# Supplementary material for: Systematic quantification of the dynamics of newly synthesized proteins unveiling their degradation pathways in human cells
Source: Chem Sci. 2020 Mar 10;11(13):3557–68. doi: 10.1039/c9sc06479f (PMC8152571; doi:10.1039/c9sc06479f)
Supplement: SC-011-C9SC06479F-s002 [file SC-011-C9SC06479F-s002.xlsx]

## Sheet: Control experiment
Table S1a - Quantifying the dynamics of 2970 proteins and their half-lives in MCF-7 cells
Uniprot ID	Gene Symbol	Degradation rate (h-1)	Standard deviation	Half-life (h)	Unique peptide hits	Annotation
A0AV96	RBM47	0.08676	0.00472	7.98925	2	RBM47_HUMAN RNA-binding protein 47
A0FGR8-6	ESYT2	0.03952	0.01056	17.5391	3	ESYT2_HUMAN Isoform 6 of Extended synaptotagmin-2
A1L0T0	ILVBL	0.06622	0.00443	10.4673	1	ILVBL_HUMAN Acetolactate synthase-like protein
A2A3N6	PIPSL	0.11749	0.00495	5.89963	1	PIPSL_HUMAN Putative PIP5K1A and PSMD4-like protein
A2RRP1	NBAS	0.05813	0.00213	11.9241	1	NBAS_HUMAN Neuroblastoma-amplified sequence
A3KMH1	VWA8	0.07108	0.00585	9.75165	1	VWA8_HUMAN von Willebrand factor A domain-containing protein 8
A3KN83	SBNO1	0.06567	0.00541	10.555	1	SBNO1_HUMAN Protein strawberry notch homolog 1
A4D1E9	GTPBP10	0.09469	0.00754	7.32017	2	GTPBA_HUMAN GTP-binding protein 10
A5YKK6	CNOT1	0.06471	0.00573	10.7116	1	CNOT1_HUMAN CCR4-NOT transcription complex subunit 1
A6NCI4	VWA3A	0.06241	0.00304	11.1063	1	VWA3A_HUMAN von Willebrand factor A domain-containing protein 3A
A6NDG6	PGP	0.03202	0.005	21.6473	3	PGP_HUMAN Phosphoglycolate phosphatase
A6NIZ1		0.02627	0.01107	26.3855	1	RP1BL_HUMAN Ras-related protein Rap-1b-like protein
A6NKD9	CCDC85C	0.1233	0.01566	5.62163	1	CC85C_HUMAN Coiled-coil domain-containing protein 85C
A6NKH3	RPL37L	0.09062	0.01688	7.64894	1	RL37L_HUMAN Putative 60S ribosomal protein L37a-like
A8MTT3	CEBPZOS	0.06836	0.00489	10.1397	1	A8MTT3_HUMAN Protein CEBPZOS
A9UHW6	MIF4GD	0.12209	0.01414	5.67735	1	MI4GD_HUMAN MIF4G domain-containing protein
A9UHW6-3	MIF4GD	0.06377	0.01157	10.8695	1	MI4GD_HUMAN Isoform 3 of MIF4G domain-containing protein
B4DTU4	LIG1	0.07846	0.00571	8.8344	1	B4DTU4_HUMAN DNA ligase
B5ME19	EIF3CL	0.37574	0.09157	1.84475	3	EIFCL_HUMAN Eukaryotic translation initiation factor 3 subunit C-like protein
C9J2U4	TAMM41	0.0467	0.00518	14.8426	1	C9J2U4_HUMAN Chromosome 3 open reading frame 31, isoform CRA_f
E7EQ69	NAA50	0.08636	0.00933	8.02625	1	E7EQ69_HUMAN N-alpha-acetyltransferase 50
E9PN48	ARFGAP2	0.06737	0.00689	10.2887	2	E9PN48_HUMAN ADP-ribosylation factor GTPase-activating protein 2 (Fragment)
E9PRG8	C11orf48	0.08261	0.00846	8.3906	2	E9PRG8_HUMAN Uncharacterized protein C11orf48
G3V4T6	GSTZ1	0.05566	0.00314	12.4532	1	G3V4T6_HUMAN Maleylacetoacetate isomerase
H0YAR2	PABPC1	0.0705	0.00557	9.83187	1	H0YAR2_HUMAN Polyadenylate-binding protein 1 (Fragment)
H0YBE0	MTDH	0.04682	0.00693	14.8045	1	H0YBE0_HUMAN Protein LYRIC (Fragment)
H0YIV9		0.12293	0.01794	5.63855	1	H0YIV9_HUMAN Uncharacterized protein (Fragment)
H0YJ12	PPP2R5C	0.06809	0.00696	10.1799	1	H0YJ12_HUMAN Serine/threonine-protein phosphatase 2A 56 kDa regulatory subunit gamma isoform (Fragment)
H7C1R8	SLC22A5	0.06458	0.00464	10.7332	1	H7C1R8_HUMAN Solute carrier family 22 member 5 (Fragment)
J3KP28	SYTL2	0.06207	0.01089	11.1672	3	J3KP28_HUMAN Synaptotagmin-like protein 2
O00151	PDLIM1	0.04695	0.00634	14.7635	2	PDLI1_HUMAN PDZ and LIM domain protein 1
O00159	MYO1C	0.07971	0.00253	8.69586	4	MYO1C_HUMAN Unconventional myosin-Ic
O00170	AIP	0.0628	0.00466	11.0374	3	AIP_HUMAN AH receptor-interacting protein
O00178	GTPBP1	0.03454	0.00995	20.068	1	GTPB1_HUMAN GTP-binding protein 1
O00186	STXBP3	0.07016	0.00497	9.87952	10	STXB3_HUMAN Syntaxin-binding protein 3
O00193	SMAP	0.04888	0.00736	14.1806	2	SMAP_HUMAN Small acidic protein
O00194	RAB27B	0.03316	0.00732	20.9031	1	RB27B_HUMAN Ras-related protein Rab-27B
O00203	AP3B1	0.05196	0.00334	13.34	2	AP3B1_HUMAN AP-3 complex subunit beta-1
O00204	SULT2B1	0.05812	0.00675	11.9261	5	ST2B1_HUMAN Sulfotransferase family cytosolic 2B member 1
O00214-2	LGALS8	0.11356	0.005	6.1038	1	LEG8_HUMAN Isoform 2 of Galectin-8
O00231-2	PSMD11	0.07169	0.00543	9.66867	7	PSD11_HUMAN Isoform 2 of 26S proteasome non-ATPase regulatory subunit 11
O00232	PSMD12	0.21302	0.03253	3.25391	6	PSD12_HUMAN 26S proteasome non-ATPase regulatory subunit 12
O00233	PSMD9	0.07373	0.00401	9.40116	1	PSMD9_HUMAN 26S proteasome non-ATPase regulatory subunit 9
O00257	CBX4	0.15527	0.00968	4.46414	4	CBX4_HUMAN E3 SUMO-protein ligase CBX4
O00267	SUPT5H	0.06431	0.01038	10.7782	4	SPT5H_HUMAN Transcription elongation factor SPT5
O00299	CLIC1	0.06741	0.00532	10.2826	3	CLIC1_HUMAN Chloride intracellular channel protein 1
O00400	SLC33A1	0.06637	0.00459	10.4437	2	ACATN_HUMAN Acetyl-coenzyme A transporter 1
O00410-3	IPO5	0.05197	0.00386	13.3374	6	IPO5_HUMAN Isoform 3 of Importin-5
O00422	SAP18	0.12905	0.00653	5.37115	5	SAP18_HUMAN Histone deacetylase complex subunit SAP18
O00429-6	DNM1L	0.03643	0.00424	19.0268	2	DNM1L_HUMAN Isoform 6 of Dynamin-1-like protein
O00458	IFRD1	0.14383	0.01509	4.81921	2	IFRD1_HUMAN Interferon-related developmental regulator 1
O00471	EXOC5	0.06158	0.00381	11.256	2	EXOC5_HUMAN Exocyst complex component 5
O00483	NDUFA4	0.09236	0.00997	7.50484	2	NDUA4_HUMAN NADH dehydrogenase [ubiquinone] 1 alpha subcomplex subunit 4
O00487	PSMD14	0.10392	0.01681	6.67001	3	PSDE_HUMAN 26S proteasome non-ATPase regulatory subunit 14
O00505	KPNA3	0.05399	0.00618	12.8384	1	IMA4_HUMAN Importin subunit alpha-4
O00506	STK25	0.07932	0.00668	8.73862	2	STK25_HUMAN Serine/threonine-protein kinase 25
O00515	LAD1	0.04016	0.00544	17.2596	7	LAD1_HUMAN Ladinin-1
O00541	PES1	0.07917	0.00956	8.75517	5	PESC_HUMAN Pescadillo homolog
O00560	SDCBP	0.10583	0.00541	6.54963	1	SDCB1_HUMAN Syntenin-1
O00566	MPHOSPH10	0.06919	0.00199	10.018	4	MPP10_HUMAN U3 small nucleolar ribonucleoprotein protein MPP10
O00567	NOP56	0.12702	0.00786	5.45699	3	NOP56_HUMAN Nucleolar protein 56
O00570	SOX1	0.05948	0.03076	11.6534	3	SOX1_HUMAN Transcription factor SOX-1
O00571	DDX3X	0.08029	0.01041	8.63304	8	DDX3X_HUMAN ATP-dependent RNA helicase DDX3X
O00629	KPNA4	0.04722	0.00511	14.6791	3	IMA3_HUMAN Importin subunit alpha-3
O00743-3	PPP6C	0.10587	0.01231	6.54715	3	PPP6_HUMAN Isoform 3 of Serine/threonine-protein phosphatase 6 catalytic subunit
O00757	FBP2	0.04071	0.00417	17.0265	1	F16P2_HUMAN Fructose-1,6-bisphosphatase isozyme 2
O00762	UBE2C	0.17308	0.01614	4.00478	4	UBE2C_HUMAN Ubiquitin-conjugating enzyme E2 C
O00767	SCD	0.25494	0.01622	2.71886	3	ACOD_HUMAN Acyl-CoA desaturase
O14497	ARID1A	0.04216	0.01258	16.4409	7	ARI1A_HUMAN AT-rich interactive domain-containing protein 1A
O14530	TXNDC9	0.13776	0.007	5.03156	3	TXND9_HUMAN Thioredoxin domain-containing protein 9
O14548	COX7A2L	0.1856	0.01748	3.73463	3	COX7R_HUMAN Cytochrome c oxidase subunit 7A-related protein, mitochondrial
O14562	UBFD1	0.0589	0.00362	11.7682	4	UBFD1_HUMAN Ubiquitin domain-containing protein UBFD1
O14578-4	CIT	0.11254	0.00466	6.15912	3	CTRO_HUMAN Isoform 4 of Citron Rho-interacting kinase
O14617-5	AP3D1	0.03963	0.00476	17.4905	4	AP3D1_HUMAN Isoform 5 of AP-3 complex subunit delta-1
O14647	CHD2	0.09951	0.00873	6.9656	1	CHD2_HUMAN Chromodomain-helicase-DNA-binding protein 2
O14656	TOR1A	0.03888	0.00701	17.8279	2	TOR1A_HUMAN Torsin-1A
O14657	TOR1B	0.05937	0.00487	11.675	6	TOR1B_HUMAN Torsin-1B
O14672	ADAM10	0.17765	0.01703	3.90176	2	ADA10_HUMAN Disintegrin and metalloproteinase domain-containing protein 10
O14681	EI24	0.0359	0.0068	19.3077	1	EI24_HUMAN Etoposide-induced protein 2.4 homolog
O14733-2	MAP2K7	0.09111	0.00625	7.60781	1	MP2K7_HUMAN Isoform 2 of Dual specificity mitogen-activated protein kinase kinase 7
O14737	PDCD5	0.09047	0.01296	7.66162	2	PDCD5_HUMAN Programmed cell death protein 5
O14744	PRMT5	0.09804	0.01078	7.07004	1	ANM5_HUMAN Protein arginine N-methyltransferase 5
O14745	SLC9A3R1	0.05288	0.00455	13.1079	3	NHRF1_HUMAN Na(+)/H(+) exchange regulatory cofactor NHE-RF1
O14753	OVOL1	0.18829	0.02976	3.68127	3	OVOL1_HUMAN Putative transcription factor Ovo-like 1
O14757	CHEK1	0.12259	0.0101	5.65419	4	CHK1_HUMAN Serine/threonine-protein kinase Chk1
O14776	TCERG1	0.06797	0.00726	10.1978	7	TCRG1_HUMAN Transcription elongation regulator 1
O14777	NDC80	0.14456	0.01524	4.79488	2	NDC80_HUMAN Kinetochore protein NDC80 homolog
O14786	NRP1	0.21304	0.01911	3.2536	2	NRP1_HUMAN Neuropilin-1
O14787	TNPO2	0.04251	0.00424	16.3055	2	TNPO2_HUMAN Transportin-2
O14818	PSMA7	0.43176	0.05663	1.6054	2	PSA7_HUMAN Proteasome subunit alpha type-7
O14832	PHYH	0.12151	0.00879	5.70445	3	PAHX_HUMAN Phytanoyl-CoA dioxygenase, peroxisomal
O14874	BCKDK	0.10795	0.00813	6.421	1	BCKD_HUMAN [3-methyl-2-oxobutanoate dehydrogenase [lipoamide]] kinase, mitochondrial
O14907	TAX1BP3	0.07056	0.00945	9.82351	1	TX1B3_HUMAN Tax1-binding protein 3
O14910	LIN7A	0.07268	0.00377	9.53697	2	LIN7A_HUMAN Protein lin-7 homolog A
O14929	HAT1	0.05247	0.0037	13.2104	5	HAT1_HUMAN Histone acetyltransferase type B catalytic subunit
O14949	UQCRQ	0.10909	0.01242	6.3539	1	QCR8_HUMAN Cytochrome b-c1 complex subunit 8
O14950	MYL12B	0.2644	0.02876	2.62159	1	ML12B_HUMAN Myosin regulatory light chain 12B
O14964	HGS	0.06887	0.00401	10.0646	8	HGS_HUMAN Hepatocyte growth factor-regulated tyrosine kinase substrate
O14965	AURKA	0.17129	0.01449	4.04663	2	AURKA_HUMAN Aurora kinase A
O14967	CLGN	0.09021	0.00877	7.68371	1	CLGN_HUMAN Calmegin
O14974	PPP1R12A	0.0644	0.00396	10.7632	4	MYPT1_HUMAN Protein phosphatase 1 regulatory subunit 12A
O14975	SLC27A2	0.04543	0.00531	15.2575	1	S27A2_HUMAN Very long-chain acyl-CoA synthetase
O14976	GAK	0.0559	0.0048	12.3998	7	GAK_HUMAN Cyclin-G-associated kinase
O14979	HNRNPDL	0.07256	0.00502	9.55275	3	HNRDL_HUMAN Heterogeneous nuclear ribonucleoprotein D-like
O14980	XPO1	0.0533	0.00478	13.0046	6	XPO1_HUMAN Exportin-1
O15020	SPTBN2	0.05786	0.00908	11.9797	5	SPTN2_HUMAN Spectrin beta chain, non-erythrocytic 2
O15037	KHNYN	0.08747	0.00464	7.9244	1	KHNYN_HUMAN Protein KHNYN
O15042	U2SURP	0.08977	0.01226	7.72137	7	SR140_HUMAN U2 snRNP-associated SURP motif-containing protein
O15090	ZNF536	0.19395	0.01601	3.57384	1	ZN536_HUMAN Zinc finger protein 536
O15091	KIAA0391	0.07446	0.00529	9.30899	8	MRRP3_HUMAN Mitochondrial ribonuclease P protein 3
O15119	TBX3	0.1508	0.01445	4.59647	2	TBX3_HUMAN T-box transcription factor TBX3
O15143	ARPC1B	0.07739	0.00482	8.95655	1	ARC1B_HUMAN Actin-related protein 2/3 complex subunit 1B
O15144	ARPC2	0.1019	0.011	6.80223	4	ARPC2_HUMAN Actin-related protein 2/3 complex subunit 2
O15145	ARPC3	0.08277	0.01026	8.37438	4	ARPC3_HUMAN Actin-related protein 2/3 complex subunit 3
O15155	BET1	0.06086	0.00359	11.3892	2	BET1_HUMAN BET1 homolog
O15162	PLSCR1	0.05935	0.00568	11.679	2	PLS1_HUMAN Phospholipid scramblase 1
O15164	TRIM24	0.07362	0.00564	9.4152	5	TIF1A_HUMAN Transcription intermediary factor 1-alpha
O15173-2	PGRMC2	0.05672	0.0044	12.2205	1	PGRC2_HUMAN Isoform 2 of Membrane-associated progesterone receptor component 2
O15198	SMAD9	0.13761	0.01123	5.03704	1	SMAD9_HUMAN Mothers against decapentaplegic homolog 9
O15226-2	NKRF	0.06207	0.00131	11.1672	4	NKRF_HUMAN Isoform 2 of NF-kappa-B-repressing factor
O15230	LAMA5	0.10232	0.0068	6.77431	1	LAMA5_HUMAN Laminin subunit alpha-5
O15231-6	ZNF185	0.05848	0.00498	11.8527	4	ZN185_HUMAN Isoform 6 of Zinc finger protein 185
O15258	RER1	0.04058	0.00925	17.081	2	RER1_HUMAN Protein RER1
O15269	SPTLC1	0.10557	0.00278	6.56576	3	SPTC1_HUMAN Serine palmitoyltransferase 1
O15270	SPTLC2	0.06514	0.00444	10.6409	1	SPTC2_HUMAN Serine palmitoyltransferase 2
O15297	PPM1D	0.27681	0.02713	2.50405	6	PPM1D_HUMAN Protein phosphatase 1D
O15305	PMM2	0.06362	0.00943	10.8951	1	PMM2_HUMAN Phosphomannomutase 2
O15321	TM9SF1	0.04984	0.0113	13.9074	1	TM9S1_HUMAN Transmembrane 9 superfamily member 1
O15347	HMGB3	0.04346	0.00384	15.9491	6	HMGB3_HUMAN High mobility group protein B3
O15355	PPM1G	0.16293	0.00925	4.25426	2	PPM1G_HUMAN Protein phosphatase 1G
O15371	EIF3D	0.07178	0.00274	9.65655	4	EIF3D_HUMAN Eukaryotic translation initiation factor 3 subunit D
O15372	EIF3H	0.12318	0.01922	5.62711	7	EIF3H_HUMAN Eukaryotic translation initiation factor 3 subunit H
O15397	IPO8	0.05967	0.0076	11.6163	1	IPO8_HUMAN Importin-8
O15417	TNRC18	0.33579	0.05037	2.06423	3	TNC18_HUMAN Trinucleotide repeat-containing gene 18 protein
O15446-2	CD3EAP	0.04601	0.00765	15.0651	1	RPA34_HUMAN Isoform 2 of DNA-directed RNA polymerase I subunit RPA34
O15460	P4HA2	0.23185	0.01979	2.98964	1	P4HA2_HUMAN Prolyl 4-hydroxylase subunit alpha-2
O15498	YKT6	0.04751	0.00369	14.5895	3	YKT6_HUMAN Synaptobrevin homolog YKT6
O15511-2	ARPC5	0.1876	0.02889	3.69481	2	ARPC5_HUMAN Isoform 2 of Actin-related protein 2/3 complex subunit 5
O15530	PDPK1	0.0653	0.00706	10.6148	2	PDPK1_HUMAN 3-phosphoinositide-dependent protein kinase 1
O15551	CLDN3	0.07722	0.00508	8.97626	2	CLD3_HUMAN Claudin-3
O43143	DHX15	0.0463	0.00322	14.9708	6	DHX15_HUMAN Putative pre-mRNA-splicing factor ATP-dependent RNA helicase DHX15
O43148-2	RNMT	0.05129	0.0048	13.5143	4	MCES_HUMAN Isoform 2 of mRNA cap guanine-N7 methyltransferase
O43166	SIPA1L1	0.0659	0.00171	10.5182	3	SI1L1_HUMAN Signal-induced proliferation-associated 1-like protein 1
O43172	PRPF4	0.05295	0.00588	13.0906	5	PRP4_HUMAN U4/U6 small nuclear ribonucleoprotein Prp4
O43175	PHGDH	0.07851	0.00692	8.82878	3	SERA_HUMAN D-3-phosphoglycerate dehydrogenase
O43181	NDUFS4	0.0928	0.00937	7.46926	4	NDUS4_HUMAN NADH dehydrogenase [ubiquinone] iron-sulfur protein 4, mitochondrial
O43242	PSMD3	0.04691	0.00525	14.7761	1	PSMD3_HUMAN 26S proteasome non-ATPase regulatory subunit 3
O43251-8	RBFOX2	0.03575	0.01158	19.3887	2	RFOX2_HUMAN Isoform 8 of RNA binding protein fox-1 homolog 2
O43290	SART1	0.06263	0.00486	11.0673	13	SNUT1_HUMAN U4/U6.U5 tri-snRNP-associated protein 1
O43293	DAPK3	0.24003	0.05033	2.88775	2	DAPK3_HUMAN Death-associated protein kinase 3
O43390	HNRNPR	0.05168	0.00481	13.4123	2	HNRPR_HUMAN Heterogeneous nuclear ribonucleoprotein R
O43390-2	HNRNPR	0.05483	0.00442	12.6418	13	HNRPR_HUMAN Isoform 2 of Heterogeneous nuclear ribonucleoprotein R
O43395	PRPF3	0.07535	0.00591	9.19903	8	PRPF3_HUMAN U4/U6 small nuclear ribonucleoprotein Prp3
O43396	TXNL1	0.05597	0.00537	12.3843	2	TXNL1_HUMAN Thioredoxin-like protein 1
O43402	EMC8	0.041	0.00332	16.906	2	EMC8_HUMAN ER membrane protein complex subunit 8
O43427	FIBP	0.19356	0.02333	3.58105	2	FIBP_HUMAN Acidic fibroblast growth factor intracellular-binding protein
O43432-3	EIF4G3	0.10593	0.009	6.54345	1	IF4G3_HUMAN Isoform 3 of Eukaryotic translation initiation factor 4 gamma 3
O43447	PPIH	0.04326	0.00275	16.0228	5	PPIH_HUMAN Peptidyl-prolyl cis-trans isomerase H
O43488	AKR7A2	0.04079	0.00573	16.9931	2	ARK72_HUMAN Aflatoxin B1 aldehyde reductase member 2
O43505	B3GNT1	0.0774	0.01211	8.95539	2	B3GN1_HUMAN N-acetyllactosaminide beta-1,3-N-acetylglucosaminyltransferase
O43524	FOXO3	0.12454	0.01094	5.56566	2	FOXO3_HUMAN Forkhead box protein O3
O43583	DENR	0.04945	0.0095	14.0171	1	DENR_HUMAN Density-regulated protein
O43615	TIMM44	0.0575	0.00473	12.0547	7	TIM44_HUMAN Mitochondrial import inner membrane translocase subunit TIM44
O43617	TRAPPC3	0.11041	0.01438	6.27794	2	TPPC3_HUMAN Trafficking protein particle complex subunit 3
O43633	CHMP2A	0.07676	0.00707	9.03006	3	CHM2A_HUMAN Charged multivesicular body protein 2a
O43657	TSPAN6	0.10065	0.00607	6.88671	1	TSN6_HUMAN Tetraspanin-6
O43663	PRC1	0.11276	0.00538	6.1471	6	PRC1_HUMAN Protein regulator of cytokinesis 1
O43665-3	RGS10	0.06963	0.01153	9.95472	1	RGS10_HUMAN Isoform 3 of Regulator of G-protein signaling 10
O43670-4	ZNF207	0.06863	0.008	10.0998	1	ZN207_HUMAN Isoform 4 of Zinc finger protein 207
O43674	NDUFB5	0.11203	0.00778	6.18716	3	NDUB5_HUMAN NADH dehydrogenase [ubiquinone] 1 beta subcomplex subunit 5, mitochondrial
O43681	ASNA1	0.0378	0.00372	18.3372	1	ASNA_HUMAN ATPase ASNA1
O43684	BUB3	0.0531	0.01257	13.0536	1	BUB3_HUMAN Mitotic checkpoint protein BUB3
O43707	ACTN4	0.04152	0.02537	16.6943	8	ACTN4_HUMAN Alpha-actinin-4
O43708	GSTZ1	0.05409	0.00444	12.8147	1	MAAI_HUMAN Maleylacetoacetate isomerase
O43709	WBSCR22	0.1277	0.01243	5.42793	2	WBS22_HUMAN Ribosome biogenesis methyltransferase WBSCR22
O43719	HTATSF1	0.04854	0.00468	14.2799	1	HTSF1_HUMAN HIV Tat-specific factor 1
O43747-2	AP1G1	0.08652	0.00713	8.01141	4	AP1G1_HUMAN Isoform 2 of AP-1 complex subunit gamma-1
O43768-4	ENSA	0.09875	0.00842	7.01921	5	ENSA_HUMAN Isoform 4 of Alpha-endosulfine
O43776	NARS	0.03926	0.00361	17.6553	3	SYNC_HUMAN Asparagine--tRNA ligase, cytoplasmic
O43795	MYO1B	0.06035	0.00233	11.4855	7	MYO1B_HUMAN Unconventional myosin-Ib
O43809	NUDT21	0.01989	0.00631	34.849	4	CPSF5_HUMAN Cleavage and polyadenylation specificity factor subunit 5
O43837	IDH3B	0.0589	0.00198	11.7682	2	IDH3B_HUMAN Isocitrate dehydrogenase [NAD] subunit beta, mitochondrial
O43865	AHCYL1	0.11601	0.0086	5.97489	1	SAHH2_HUMAN Putative adenosylhomocysteinase 2
O43933	PEX1	0.10054	0.01788	6.89424	1	PEX1_HUMAN Peroxisome biogenesis factor 1
O60216	RAD21	0.09689	0.01158	7.15396	1	RAD21_HUMAN Double-strand-break repair protein rad21 homolog
O60237	PPP1R12B	0.04807	0.00635	14.4195	1	MYPT2_HUMAN Protein phosphatase 1 regulatory subunit 12B
O60238	BNIP3L	0.28143	0.03161	2.46295	2	BNI3L_HUMAN BCL2/adenovirus E1B 19 kDa protein-interacting protein 3-like
O60264	SMARCA5	0.13376	0.01081	5.18202	2	SMCA5_HUMAN SWI/SNF-related matrix-associated actin-dependent regulator of chromatin subfamily A member 5
O60271	SPAG9	0.06349	0.00315	10.9174	3	JIP4_HUMAN C-Jun-amino-terminal kinase-interacting protein 4
O60292	SIPA1L3	0.03922	0.00246	17.6733	4	SI1L3_HUMAN Signal-induced proliferation-associated 1-like protein 3
O60313-2	OPA1	0.05514	0.00487	12.5707	14	OPA1_HUMAN Isoform 2 of Dynamin-like 120 kDa protein, mitochondrial
O60333-3	KIF1B	0.10849	0.00736	6.38904	1	KIF1B_HUMAN Isoform 3 of Kinesin-like protein KIF1B
O60333-4	KIF1B	0.09958	0.00542	6.96071	2	KIF1B_HUMAN Isoform 4 of Kinesin-like protein KIF1B
O60437	PPL	0.07116	0.00861	9.74069	1	PEPL_HUMAN Periplakin
O60476	MAN1A2	0.07078	0.00554	9.79298	1	MA1A2_HUMAN Mannosyl-oligosaccharide 1,2-alpha-mannosidase IB
O60493	SNX3	0.10016	0.00673	6.9204	3	SNX3_HUMAN Sorting nexin-3
O60502	MGEA5	0.19273	0.01874	3.59647	2	NCOAT_HUMAN Bifunctional protein NCOAT
O60506	SYNCRIP	0.04672	0.0011	14.8362	8	HNRPQ_HUMAN Heterogeneous nuclear ribonucleoprotein Q
O60508	CDC40	0.16899	0.02581	4.10171	1	PRP17_HUMAN Pre-mRNA-processing factor 17
O60513	B4GALT4	0.09146	0.00814	7.57869	2	B4GT4_HUMAN Beta-1,4-galactosyltransferase 4
O60563	CCNT1	0.04847	0.00844	14.3005	4	CCNT1_HUMAN Cyclin-T1
O60610	DIAPH1	0.1235	0.00926	5.61253	2	DIAP1_HUMAN Protein diaphanous homolog 1
O60645	EXOC3	0.05698	0.00307	12.1647	2	EXOC3_HUMAN Exocyst complex component 3
O60664	PLIN3	0.083	0.00628	8.35117	8	PLIN3_HUMAN Perilipin-3
O60669	SLC16A7	0.13307	0.01193	5.20889	2	MOT2_HUMAN Monocarboxylate transporter 2
O60678	PRMT3	0.06435	0.0039	10.7715	2	ANM3_HUMAN Protein arginine N-methyltransferase 3
O60684	KPNA6	0.06177	0.00339	11.2214	1	IMA7_HUMAN Importin subunit alpha-7
O60701	UGDH	0.04345	0.00434	15.9528	11	UGDH_HUMAN UDP-glucose 6-dehydrogenase
O60716	CTNND1	0.06809	0.00624	10.1799	5	CTND1_HUMAN Catenin delta-1
O60749	SNX2	0.0509	0.0043	13.6178	6	SNX2_HUMAN Sorting nexin-2
O60762	DPM1	0.05845	0.0064	11.8588	3	DPM1_HUMAN Dolichol-phosphate mannosyltransferase
O60825	PFKFB2	0.04798	0.00556	14.4466	1	F262_HUMAN 6-phosphofructo-2-kinase/fructose-2,6-bisphosphatase 2
O60832	DKC1	0.17742	0.00869	3.90682	3	DKC1_HUMAN H/ACA ribonucleoprotein complex subunit 4
O60841	EIF5B	0.06921	0.00171	10.0151	10	IF2P_HUMAN Eukaryotic translation initiation factor 5B
O60870	KIN	0.08687	0.01231	7.97913	1	KIN17_HUMAN DNA/RNA-binding protein KIN17
O60884	DNAJA2	0.06248	0.00499	11.0939	8	DNJA2_HUMAN DnaJ homolog subfamily A member 2
O60885	BRD4	0.11973	0.00684	5.78925	5	BRD4_HUMAN Bromodomain-containing protein 4
O60911	CTSV	0.31302	0.05194	2.21439	1	CATL2_HUMAN Cathepsin L2
O60925	PFDN1	0.04741	0.00375	14.6203	1	PFD1_HUMAN Prefoldin subunit 1
O60930	RNASEH1	0.20247	0.01772	3.42346	1	RNH1_HUMAN Ribonuclease H1
O60934	NBN	0.07682	0.00392	9.023	1	NBN_HUMAN Nibrin
O75083	WDR1	0.06599	0.00381	10.5038	2	WDR1_HUMAN WD repeat-containing protein 1
O75110	ATP9A	0.11354	0.00759	6.10487	1	ATP9A_HUMAN Probable phospholipid-transporting ATPase IIA
O75112-7	LDB3	0.0625	0.00777	11.0904	1	LDB3_HUMAN Isoform 7 of LIM domain-binding protein 3
O75116	ROCK2	0.11854	0.00883	5.84737	3	ROCK2_HUMAN Rho-associated protein kinase 2
O75122	CLASP2	0.04498	0.00456	15.4101	2	CLAP2_HUMAN CLIP-associating protein 2
O75127	PTCD1	0.09164	0.00391	7.56381	4	PTCD1_HUMAN Pentatricopeptide repeat-containing protein 1, mitochondrial
O75128-2	COBL	0.05181	0.00545	13.3786	4	COBL_HUMAN Isoform 2 of Protein cordon-bleu
O75131	CPNE3	0.04962	0.00632	13.9691	6	CPNE3_HUMAN Copine-3
O75146	HIP1R	0.04823	0.00597	14.3717	5	HIP1R_HUMAN Huntingtin-interacting protein 1-related protein
O75151	PHF2	0.05375	0.00358	12.8958	2	PHF2_HUMAN Lysine-specific demethylase PHF2
O75152	ZC3H11A	0.0695	0.00618	9.97334	9	ZC11A_HUMAN Zinc finger CCCH domain-containing protein 11A
O75155	CAND2	0.04692	0.00264	14.773	1	CAND2_HUMAN Cullin-associated NEDD8-dissociated protein 2
O75175	CNOT3	0.1128	0.00673	6.14492	2	CNOT3_HUMAN CCR4-NOT transcription complex subunit 3
O75190	DNAJB6	0.10546	0.0111	6.57261	3	DNJB6_HUMAN DnaJ homolog subfamily B member 6
O75190-2	DNAJB6	0.15113	0.01134	4.58643	2	DNJB6_HUMAN Isoform B of DnaJ homolog subfamily B member 6
O75208	COQ9	0.06745	0.00193	10.2765	1	COQ9_HUMAN Ubiquinone biosynthesis protein COQ9, mitochondrial
O75306	NDUFS2	0.10747	0.00893	6.44968	1	NDUS2_HUMAN NADH dehydrogenase [ubiquinone] iron-sulfur protein 2, mitochondrial
O75319	DUSP11	0.14752	0.01036	4.69867	1	DUS11_HUMAN RNA/RNP complex-1-interacting phosphatase
O75323	GBAS	0.04412	0.00616	15.7105	4	NIPS2_HUMAN Protein NipSnap homolog 2
O75330-3	HMMR	0.20545	0.00446	3.3738	4	HMMR_HUMAN Isoform 3 of Hyaluronan mediated motility receptor
O75334	PPFIA2	0.05305	0.0018	13.0659	1	LIPA2_HUMAN Liprin-alpha-2
O75351	VPS4B	0.07343	0.01159	9.43956	6	VPS4B_HUMAN Vacuolar protein sorting-associated protein 4B
O75352	MPDU1	0.05078	0.00295	13.65	2	MPU1_HUMAN Mannose-P-dolichol utilization defect 1 protein
O75362	ZNF217	0.18345	0.02629	3.7784	21	ZN217_HUMAN Zinc finger protein 217
O75367	H2AFY	0.04643	0.00638	14.9289	1	H2AY_HUMAN Core histone macro-H2A.1
O75369-8	FLNB	0.05612	0.00308	12.3512	49	FLNB_HUMAN Isoform 8 of Filamin-B
O75376	NCOR1	0.07212	0.00951	9.61103	3	NCOR1_HUMAN Nuclear receptor corepressor 1
O75386	TULP3	0.15966	0.01764	4.3414	1	TULP3_HUMAN Tubby-related protein 3
O75390	CS	0.04607	0.00721	15.0455	9	CISY_HUMAN Citrate synthase, mitochondrial
O75391	SPAG7	0.07172	0.00402	9.66463	2	SPAG7_HUMAN Sperm-associated antigen 7
O75394	MRPL33	0.07686	0.00543	9.01831	2	RM33_HUMAN 39S ribosomal protein L33, mitochondrial
O75396	SEC22B	0.06029	0.00658	11.4969	2	SC22B_HUMAN Vesicle-trafficking protein SEC22b
O75400	PRPF40A	0.07392	0.00466	9.37699	10	PR40A_HUMAN Pre-mRNA-processing factor 40 homolog A
O75431	MTX2	0.08841	0.00531	7.84014	2	MTX2_HUMAN Metaxin-2
O75436	VPS26A	0.04558	0.00612	15.2073	4	VP26A_HUMAN Vacuolar protein sorting-associated protein 26A
O75438-2	NDUFB1	0.44466	0.07991	1.55883	2	NDUB1_HUMAN Isoform 2 of NADH dehydrogenase [ubiquinone] 1 beta subcomplex subunit 1
O75439	PMPCB	0.08375	0.0057	8.27638	3	MPPB_HUMAN Mitochondrial-processing peptidase subunit beta
O75449	KATNA1	0.10807	0.00759	6.41387	1	KTNA1_HUMAN Katanin p60 ATPase-containing subunit A1
O75475	PSIP1	0.05136	0.00631	13.4959	6	PSIP1_HUMAN PC4 and SFRS1-interacting protein
O75496	GMNN	0.12709	0.01238	5.45399	1	GEMI_HUMAN Geminin
O75521	ECI2	0.04194	0.008	16.5271	2	ECI2_HUMAN Enoyl-CoA delta isomerase 2, mitochondrial
O75526	RBMXL2	0.01823	0.007	38.0223	1	RMXL2_HUMAN RNA-binding motif protein, X-linked-like-2
O75528	TADA3	0.19912	0.02066	3.48105	5	TADA3_HUMAN Transcriptional adapter 3
O75530-2	EED	0.12331	0.01002	5.62118	2	EED_HUMAN Isoform 2 of Polycomb protein EED
O75531	BANF1	0.04216	0.01725	16.4409	1	BAF_HUMAN Barrier-to-autointegration factor
O75533	SF3B1	0.06998	0.00706	9.90493	14	SF3B1_HUMAN Splicing factor 3B subunit 1
O75534-3	CSDE1	0.31538	0.02173	2.19782	16	CSDE1_HUMAN Isoform 3 of Cold shock domain-containing protein E1
O75582	RPS6KA5	0.07994	0.00788	8.67084	1	KS6A5_HUMAN Ribosomal protein S6 kinase alpha-5
O75608	LYPLA1	0.05688	0.00537	12.1861	3	LYPA1_HUMAN Acyl-protein thioesterase 1
O75616	ERAL1	0.06298	0.00237	11.0058	2	ERAL1_HUMAN GTPase Era, mitochondrial
O75643	SNRNP200	0.19896	0.00781	3.48385	4	U520_HUMAN U5 small nuclear ribonucleoprotein 200 kDa helicase
O75648	TRMU	0.04908	0.00569	14.1228	1	MTU1_HUMAN Mitochondrial tRNA-specific 2-thiouridylase 1
O75674	TOM1L1	0.12106	0.0085	5.72565	1	TM1L1_HUMAN TOM1-like protein 1
O75676	RPS6KA4	0.1037	0.00779	6.68416	1	KS6A4_HUMAN Ribosomal protein S6 kinase alpha-4
O75683	SURF6	0.09142	0.00648	7.58201	3	SURF6_HUMAN Surfeit locus protein 6
O75691	UTP20	0.07629	0.00556	9.08569	1	UTP20_HUMAN Small subunit processome component 20 homolog
O75694	NUP155	0.0676	0.00559	10.2537	4	NU155_HUMAN Nuclear pore complex protein Nup155
O75717	WDHD1	0.05646	0.00785	12.2768	3	WDHD1_HUMAN WD repeat and HMG-box DNA-binding protein 1
O75718	CRTAP	0.22042	0.03035	3.14467	2	CRTAP_HUMAN Cartilage-associated protein
O75746	SLC25A12	0.05566	0.00232	12.4532	3	CMC1_HUMAN Calcium-binding mitochondrial carrier protein Aralar1
O75787	ATP6AP2	0.13073	0.01646	5.30213	1	RENR_HUMAN Renin receptor
O75821	EIF3G	0.04661	0.00821	14.8712	3	EIF3G_HUMAN Eukaryotic translation initiation factor 3 subunit G
O75822	EIF3J	0.0275	0.00701	25.2054	2	EIF3J_HUMAN Eukaryotic translation initiation factor 3 subunit J
O75828	CBR3	0.0333	0.00433	20.8152	1	CBR3_HUMAN Carbonyl reductase [NADPH] 3
O75832	PSMD10	0.05372	0.00935	12.903	1	PSD10_HUMAN 26S proteasome non-ATPase regulatory subunit 10
O75844	ZMPSTE24	0.03274	0.00637	21.1713	2	FACE1_HUMAN CAAX prenyl protease 1 homolog
O75845	SC5D	0.09519	0.00754	7.28172	1	SC5D_HUMAN Lathosterol oxidase
O75874	IDH1	0.05597	0.00811	12.3843	8	IDHC_HUMAN Isocitrate dehydrogenase [NADP] cytoplasmic
O75879	PET112	0.07633	0.0104	9.08093	1	GATB_HUMAN Glutamyl-tRNA(Gln) amidotransferase subunit B, mitochondrial
O75884	RBBP9	0.05169	0.0055	13.4097	1	RBBP9_HUMAN Putative hydrolase RBBP9
O75909-4	CCNK	0.06653	0.00319	10.4186	2	CCNK_HUMAN Isoform 4 of Cyclin-K
O75914-3	PAK3	0.04735	0.0027	14.6388	1	PAK3_HUMAN Isoform 3 of Serine/threonine-protein kinase PAK 3
O75915	ARL6IP5	0.06167	0.01725	11.2396	1	PRAF3_HUMAN PRA1 family protein 3
O75923-13	DYSF	0.05933	0.00379	11.6829	1	DYSF_HUMAN Isoform 13 of Dysferlin
O75934	BCAS2	0.39864	0.04832	1.73878	3	SPF27_HUMAN Pre-mRNA-splicing factor SPF27
O75937	DNAJC8	0.04367	0.00365	15.8724	6	DNJC8_HUMAN DnaJ homolog subfamily C member 8
O75940	SMNDC1	0.07002	0.00363	9.89927	4	SPF30_HUMAN Survival of motor neuron-related-splicing factor 30
O75947	ATP5H	0.07951	0.0049	8.71774	3	ATP5H_HUMAN ATP synthase subunit d, mitochondrial
O75955	FLOT1	0.15227	0.0064	4.55209	2	FLOT1_HUMAN Flotillin-1
O75962	TRIO	0.06855	0.0023	10.1116	1	TRIO_HUMAN Triple functional domain protein
O75964	ATP5L	0.17791	0.0332	3.89606	1	ATP5L_HUMAN ATP synthase subunit g, mitochondrial
O76003	GLRX3	0.04642	0.00572	14.9321	4	GLRX3_HUMAN Glutaredoxin-3
O76021	RSL1D1	0.04173	0.00671	16.6103	8	RL1D1_HUMAN Ribosomal L1 domain-containing protein 1
O76031	CLPX	0.06329	0.00655	10.9519	8	CLPX_HUMAN ATP-dependent Clp protease ATP-binding subunit clpX-like, mitochondrial
O76041-2	NEBL	0.05412	0.00934	12.8076	3	NEBL_HUMAN Isoform 2 of Nebulette
O76062	TM7SF2	0.10025	0.00561	6.91419	1	ERG24_HUMAN Delta(14)-sterol reductase
O76080	ZFAND5	0.39236	0.06885	1.76661	1	ZFAN5_HUMAN AN1-type zinc finger protein 5
O76094	SRP72	0.06416	0.00328	10.8034	8	SRP72_HUMAN Signal recognition particle subunit SRP72
O76095	JTB	0.08357	0.00518	8.29421	1	JTB_HUMAN Protein JTB
O94776	MTA2	0.11509	0.00816	6.02265	3	MTA2_HUMAN Metastasis-associated protein MTA2
O94804	STK10	0.03894	0.00767	17.8004	3	STK10_HUMAN Serine/threonine-protein kinase 10
O94822-3	LTN1	0.12737	0.01045	5.442	1	LTN1_HUMAN Isoform 3 of E3 ubiquitin-protein ligase listerin
O94826	TOMM70A	0.05786	0.00799	11.9797	15	TOM70_HUMAN Mitochondrial import receptor subunit TOM70
O94855-2	SEC24D	0.08396	0.00432	8.25568	1	SC24D_HUMAN Isoform 2 of Protein transport protein Sec24D
O94874	UFL1	0.05057	0.00562	13.7067	7	UFL1_HUMAN E3 UFM1-protein ligase 1
O94874-3	UFL1	0.00141	0.00773	>200	1	UFL1_HUMAN Isoform 3 of E3 UFM1-protein ligase 1
O94885	SASH1	0.11879	0.00599	5.83506	1	SASH1_HUMAN SAM and SH3 domain-containing protein 1
O94888	UBXN7	0.05767	0.01011	12.0192	1	UBXN7_HUMAN UBX domain-containing protein 7
O94903	PROSC	0.05122	0.00604	13.5327	2	PROSC_HUMAN Proline synthase co-transcribed bacterial homolog protein
O94906	PRPF6	0.14275	0.00557	4.85567	11	PRP6_HUMAN Pre-mRNA-processing factor 6
O94913	PCF11	0.089	0.00617	7.78817	11	PCF11_HUMAN Pre-mRNA cleavage complex 2 protein Pcf11
O94925	GLS	0.0498	0.0074	13.9186	8	GLSK_HUMAN Glutaminase kidney isoform, mitochondrial
O94952	FBXO21	0.14372	0.01116	4.8229	3	FBX21_HUMAN F-box only protein 21
O94955	RHOBTB3	0.23379	0.0429	2.96483	1	RHBT3_HUMAN Rho-related BTB domain-containing protein 3
O94964-2	SOGA1	0.06347	0.0119	10.9209	1	SOGA1_HUMAN Isoform 2 of Protein SOGA1
O94966-5	USP19	0.07842	0.00527	8.83891	1	UBP19_HUMAN Isoform 5 of Ubiquitin carboxyl-terminal hydrolase 19
O94972	TRIM37	0.51599	0.10562	1.34333	2	TRI37_HUMAN E3 ubiquitin-protein ligase TRIM37
O94979-8	SEC31A	0.04387	0.0065	15.8	9	SC31A_HUMAN Isoform 8 of Protein transport protein Sec31A
O95067	CCNB2	0.23554	0.03137	2.9428	1	CCNB2_HUMAN G2/mitotic-specific cyclin-B2
O95071	UBR5	0.11298	0.00422	6.13513	4	UBR5_HUMAN E3 ubiquitin-protein ligase UBR5
O95084	PRSS23	1.68615	0.59474	0.411083	2	PRS23_HUMAN Serine protease 23
O95104	SCAF4	0.06221	0.00505	11.1421	2	SFR15_HUMAN Splicing factor, arginine/serine-rich 15
O95139	NDUFB6	0.0971	0.00981	7.13849	3	NDUB6_HUMAN NADH dehydrogenase [ubiquinone] 1 beta subcomplex subunit 6
O95140	MFN2	0.09189	0.00489	7.54323	1	MFN2_HUMAN Mitofusin-2
O95163	IKBKAP	0.09314	0.0087	7.44199	1	ELP1_HUMAN Elongator complex protein 1
O95166	GABARAP	0.14393	0.01169	4.81586	2	GBRAP_HUMAN Gamma-aminobutyric acid receptor-associated protein
O95182	NDUFA7	0.09877	0.00681	7.01779	2	NDUA7_HUMAN NADH dehydrogenase [ubiquinone] 1 alpha subcomplex subunit 7
O95197	RTN3	0.03461	0.0061	20.0274	3	RTN3_HUMAN Reticulon-3
O95201	ZNF205	0.14645	0.01658	4.733	1	ZN205_HUMAN Zinc finger protein 205
O95202	LETM1	0.05983	0.00379	11.5853	12	LETM1_HUMAN LETM1 and EF-hand domain-containing protein 1, mitochondrial
O95208	EPN2	0.07433	0.00494	9.32527	4	EPN2_HUMAN Epsin-2
O95218	ZRANB2	0.05821	0.00938	11.9077	2	ZRAB2_HUMAN Zinc finger Ran-binding domain-containing protein 2
O95229	ZWINT	0.30826	0.03856	2.24858	1	ZWINT_HUMAN ZW10 interactor
O95232	LUC7L3	0.06686	0.0017	10.3671	4	LC7L3_HUMAN Luc7-like protein 3
O95239	KIF4A	0.05542	0.00706	12.5072	4	KIF4A_HUMAN Chromosome-associated kinesin KIF4A
O95243	MBD4	0.09078	0.00331	7.63546	4	MBD4_HUMAN Methyl-CpG-binding domain protein 4
O95249	GOSR1	0.06727	0.00526	10.304	2	GOSR1_HUMAN Golgi SNAP receptor complex member 1
O95292	VAPB	0.03901	0.00636	17.7684	9	VAPB_HUMAN Vesicle-associated membrane protein-associated protein B/C
O95298	NDUFC2	0.1789	0.02233	3.8745	3	NDUC2_HUMAN NADH dehydrogenase [ubiquinone] 1 subunit C2
O95299	NDUFA10	0.10736	0.00777	6.45629	5	NDUAA_HUMAN NADH dehydrogenase [ubiquinone] 1 alpha subcomplex subunit 10, mitochondrial
O95319-3	CELF2	0.05456	0.00748	12.7043	4	CELF2_HUMAN Isoform 3 of CUGBP Elav-like family member 2
O95340-2	PAPSS2	0.056	0.00422	12.3776	4	PAPS2_HUMAN Isoform B of Bifunctional 3'-phosphoadenosine 5'-phosphosulfate synthase 2
O95347	SMC2	0.13714	0.00745	5.0543	4	SMC2_HUMAN Structural maintenance of chromosomes protein 2
O95372	LYPLA2	0.06075	0.00958	11.4098	1	LYPA2_HUMAN Acyl-protein thioesterase 2
O95373	IPO7	0.04721	0.00296	14.6822	2	IPO7_HUMAN Importin-7
O95391	SLU7	0.12364	0.00647	5.60617	3	SLU7_HUMAN Pre-mRNA-splicing factor SLU7
O95402	MED26	0.14661	0.01156	4.72783	2	MED26_HUMAN Mediator of RNA polymerase II transcription subunit 26
O95425	SVIL	0.04608	0.00501	15.0423	9	SVIL_HUMAN Supervillin
O95433	AHSA1	0.05503	0.0069	12.5958	6	AHSA1_HUMAN Activator of 90 kDa heat shock protein ATPase homolog 1
O95453	PARN	0.07987	0.00431	8.67844	2	PARN_HUMAN Poly(A)-specific ribonuclease PARN
O95456	PSMG1	0.10305	0.0126	6.72632	1	PSMG1_HUMAN Proteasome assembly chaperone 1
O95470	SGPL1	0.04063	0.00694	17.06	7	SGPL1_HUMAN Sphingosine-1-phosphate lyase 1
O95471	CLDN7	0.07822	0.00559	8.86151	2	CLD7_HUMAN Claudin-7
O95563	MPC2	0.10155	0.0096	6.82567	1	MPC2_HUMAN Mitochondrial pyruvate carrier 2
O95573	ACSL3	0.09849	0.00572	7.03774	5	ACSL3_HUMAN Long-chain-fatty-acid--CoA ligase 3
O95630	STAMBP	0.0705	0.00212	9.83187	1	STABP_HUMAN STAM-binding protein
O95671	ASMTL	0.08762	0.01265	7.91083	2	ASML_HUMAN N-acetylserotonin O-methyltransferase-like protein
O95716	RAB3D	0.04401	0.01325	15.7498	1	RAB3D_HUMAN Ras-related protein Rab-3D
O95747	OXSR1	0.03997	0.004	17.3417	4	OXSR1_HUMAN Serine/threonine-protein kinase OSR1
O95749	GGPS1	0.06165	0.00482	11.2433	1	GGPPS_HUMAN Geranylgeranyl pyrophosphate synthase
O95758-4	PTBP3	0.06276	0.00481	11.0444	6	PTBP3_HUMAN Isoform 4 of Polypyrimidine tract-binding protein 3
O95782	AP2A1	0.05321	0.00313	13.0266	4	AP2A1_HUMAN AP-2 complex subunit alpha-1
O95785	WIZ	0.0373	0.00707	18.583	2	WIZ_HUMAN Protein Wiz
O95793	STAU1	0.05743	0.00195	12.0694	5	STAU1_HUMAN Double-stranded RNA-binding protein Staufen homolog 1
O95801	TTC4	0.0581	0.00862	11.9302	2	TTC4_HUMAN Tetratricopeptide repeat protein 4
O95817	BAG3	0.10922	0.01384	6.34634	2	BAG3_HUMAN BAG family molecular chaperone regulator 3
O95831	AIFM1	0.05978	0.00935	11.595	8	AIFM1_HUMAN Apoptosis-inducing factor 1, mitochondrial
O95858	TSPAN15	0.11899	0.00621	5.82526	1	TSN15_HUMAN Tetraspanin-15
O95873	C6orf47	0.05847	0.00486	11.8547	1	CF047_HUMAN Uncharacterized protein C6orf47
O95881	TXNDC12	0.10766	0.00273	6.4383	2	TXD12_HUMAN Thioredoxin domain-containing protein 12
O95900	TRUB2	0.31143	0.04532	2.22569	1	TRUB2_HUMAN Probable tRNA pseudouridine synthase 2
O95994	AGR2	0.06638	0.0045	10.4421	2	AGR2_HUMAN Anterior gradient protein 2 homolog
O96000	NDUFB10	0.1982	0.02925	3.49721	3	NDUBA_HUMAN NADH dehydrogenase [ubiquinone] 1 beta subcomplex subunit 10
O96005	CLPTM1	0.04841	0.00649	14.3183	1	CLPT1_HUMAN Cleft lip and palate transmembrane protein 1
O96008	TOMM40	0.06563	0.00854	10.5614	3	TOM40_HUMAN Mitochondrial import receptor subunit TOM40 homolog
O96011	PEX11B	0.05402	0.00591	12.8313	1	PX11B_HUMAN Peroxisomal membrane protein 11B
O96013	PAK4	0.0722	0.00678	9.60038	3	PAK4_HUMAN Serine/threonine-protein kinase PAK 4
P00156	MT-CYB	0.05224	0.00786	13.2685	1	CYB_HUMAN Cytochrome b
P00167	CYB5A	0.05646	0.00724	12.2768	3	CYB5_HUMAN Cytochrome b5
P00338-3	LDHA	0.04694	0.00897	14.7667	12	LDHA_HUMAN Isoform 3 of L-lactate dehydrogenase A chain
P00367	GLUD1	0.11809	0.00957	5.86965	4	DHE3_HUMAN Glutamate dehydrogenase 1, mitochondrial
P00387-3	CYB5R3	0.05878	0.00431	11.7922	2	NB5R3_HUMAN Isoform 3 of NADH-cytochrome b5 reductase 3
P00390	GSR	0.16904	0.02379	4.10049	2	GSHR_HUMAN Glutathione reductase, mitochondrial
P00491	PNP	0.1073	0.01414	6.4599	1	PNPH_HUMAN Purine nucleoside phosphorylase
P00492	HPRT1	0.01838	0.00792	37.712	3	HPRT_HUMAN Hypoxanthine-guanine phosphoribosyltransferase
P00505	GOT2	0.03053	0.01609	22.7038	5	AATM_HUMAN Aspartate aminotransferase, mitochondrial
P00558	PGK1	0.03946	0.00585	17.5658	16	PGK1_HUMAN Phosphoglycerate kinase 1
P00568	AK1	0.05537	0.00808	12.5185	2	KAD1_HUMAN Adenylate kinase isoenzyme 1
P00966	ASS1	0.06307	0.00576	10.9901	14	ASSY_HUMAN Argininosuccinate synthase
P00973-3	OAS1	0.04823	0.00276	14.3717	2	OAS1_HUMAN Isoform p48 of 2'-5'-oligoadenylate synthase 1
P01111	NRAS	0.01062	0.00788	65.2681	5	RASN_HUMAN GTPase NRas
P01116	KRAS	0.04171	0.00539	16.6182	2	RASK_HUMAN GTPase KRas
P02545	LMNA	0.07116	0.00676	9.74069	10	LMNA_HUMAN Prelamin-A/C
P02786	TFRC	0.09287	0.00441	7.46363	1	TFR1_HUMAN Transferrin receptor protein 1
P02794	FTH1	0.21224	0.06225	3.26586	4	FRIH_HUMAN Ferritin heavy chain
P03372	ESR1	0.2851	0.04258	2.43124	1	ESR1_HUMAN Estrogen receptor
P04049-2	RAF1	0.07237	0.01094	9.57782	1	RAF1_HUMAN Isoform 2 of RAF proto-oncogene serine/threonine-protein kinase
P04062	GBA	0.1423	0.00986	4.87103	2	GLCM_HUMAN Glucosylceramidase
P04075-2	ALDOA	0.00637	0.01923	108.814	9	ALDOA_HUMAN Isoform 2 of Fructose-bisphosphate aldolase A
P04080	CSTB	0.03681	0.00466	18.8304	3	CYTB_HUMAN Cystatin-B
P04083	ANXA1	0.05806	0.00631	11.9385	1	ANXA1_HUMAN Annexin A1
P04150-3	NR3C1	0.07127	0.00733	9.72565	1	GCR_HUMAN Isoform Alpha-2 of Glucocorticoid receptor
P04156	PRNP	0.10966	0.00951	6.32088	1	PRIO_HUMAN Major prion protein
P04181	OAT	0.06901	0.00712	10.0442	9	OAT_HUMAN Ornithine aminotransferase, mitochondrial
P04183	TK1	0.08282	0.00381	8.36932	4	KITH_HUMAN Thymidine kinase, cytosolic
P04406	GAPDH	0.0501	0.00401	13.8353	13	G3P_HUMAN Glyceraldehyde-3-phosphate dehydrogenase
P04632	CAPNS1	0.3618	0.08253	1.91583	3	CPNS1_HUMAN Calpain small subunit 1
P04792	HSPB1	0.09252	0.01157	7.49186	4	HSPB1_HUMAN Heat shock protein beta-1
P04798	CYP1A1	0.40433	0.04671	1.71431	1	CP1A1_HUMAN Cytochrome P450 1A1
P04843	RPN1	0.07287	0.00765	9.51211	14	RPN1_HUMAN Dolichyl-diphosphooligosaccharide--protein glycosyltransferase subunit 1
P04844	RPN2	0.11984	0.00816	5.78394	7	RPN2_HUMAN Dolichyl-diphosphooligosaccharide--protein glycosyltransferase subunit 2
P04899-4	GNAI2	0.07494	0.00688	9.24936	5	GNAI2_HUMAN Isoform sGi2 of Guanine nucleotide-binding protein G(i) subunit alpha-2
P05026	ATP1B1	0.11453	0.00863	6.0521	8	AT1B1_HUMAN Sodium/potassium-transporting ATPase subunit beta-1
P05114	HMGN1	0.02072	0.00712	33.453	3	HMGN1_HUMAN Non-histone chromosomal protein HMG-14
P05141	SLC25A5	0.0537	0.00648	12.9078	4	ADT2_HUMAN ADP/ATP translocase 2
P05161	ISG15	0.06216	0.00891	11.151	3	ISG15_HUMAN Ubiquitin-like protein ISG15
P05198	EIF2S1	0.04734	0.00612	14.6419	5	IF2A_HUMAN Eukaryotic translation initiation factor 2 subunit 1
P05204	HMGN2	0.01972	0.00781	35.1495	1	HMGN2_HUMAN Non-histone chromosomal protein HMG-17
P05386	RPLP1	0.10141	0.00734	6.8351	1	RLA1_HUMAN 60S acidic ribosomal protein P1
P05387	RPLP2	0.07119	0.0035	9.73658	1	RLA2_HUMAN 60S acidic ribosomal protein P2
P05388	RPLP0	0.04749	0.00451	14.5956	3	RLA0_HUMAN 60S acidic ribosomal protein P0
P05455	SSB	0.05824	0.01147	11.9016	4	LA_HUMAN Lupus La protein
P05556	ITGB1	0.16331	0.01001	4.24436	1	ITB1_HUMAN Integrin beta-1
P05556-3	ITGB1	0.05233	0.01787	13.2457	4	ITB1_HUMAN Isoform 3 of Integrin beta-1
P06280	GLA	0.15557	0.0085	4.45553	1	AGAL_HUMAN Alpha-galactosidase A
P06396	GSN	0.04381	0.00462	15.8217	4	GELS_HUMAN Gelsolin
P06400	RB1	0.07786	0.00481	8.90248	2	RB_HUMAN Retinoblastoma-associated protein
P06401	PGR	0.07684	0.0048	9.02066	1	PRGR_HUMAN Progesterone receptor
P06493	CDK1	0.06762	0.00361	10.2506	2	CDK1_HUMAN Cyclin-dependent kinase 1
P06576	ATP5B	0.13953	0.01065	4.96773	4	ATPB_HUMAN ATP synthase subunit beta, mitochondrial
P06703	S100A6	0.06289	0.0063	11.0216	2	S10A6_HUMAN Protein S100-A6
P06730-2	EIF4E	0.03881	0.00458	17.86	3	IF4E_HUMAN Isoform 2 of Eukaryotic translation initiation factor 4E
P06733	ENO1	0.05795	0.00224	11.9611	13	ENOA_HUMAN Alpha-enolase
P06744-2	GPI	0.26796	0.06307	2.58676	5	G6PI_HUMAN Isoform 2 of Glucose-6-phosphate isomerase
P06748	NPM1	0.05501	0.00383	12.6004	10	NPM_HUMAN Nucleophosmin
P06753	TPM3	0.09407	0.00327	7.36842	3	TPM3_HUMAN Tropomyosin alpha-3 chain
P07099	EPHX1	0.06328	0.00423	10.9537	1	HYEP_HUMAN Epoxide hydrolase 1
P07108-5	DBI	0.0232	0.00665	29.877	3	ACBP_HUMAN Isoform 5 of Acyl-CoA-binding protein
P07195	LDHB	0.00856	0.00464	80.9751	1	LDHB_HUMAN L-lactate dehydrogenase B chain
P07237	P4HB	0.09187	0.00413	7.54487	1	PDIA1_HUMAN Protein disulfide-isomerase
P07305	H1F0	0.04655	0.00359	14.8904	6	H10_HUMAN Histone H1.0
P07355-2	ANXA2	0.04706	0.00616	14.729	1	ANXA2_HUMAN Isoform 2 of Annexin A2
P07384	CAPN1	0.06752	0.00539	10.2658	1	CAN1_HUMAN Calpain-1 catalytic subunit
P07602-3	PSAP	0.0663	0.00388	10.4547	2	SAP_HUMAN Isoform Sap-mu-9 of Prosaposin
P07686	HEXB	0.03684	0.00463	18.8151	5	HEXB_HUMAN Beta-hexosaminidase subunit beta
P07737	PFN1	0.07387	0.01372	9.38334	7	PROF1_HUMAN Profilin-1
P07814	EPRS	0.08965	0.00435	7.7317	4	SYEP_HUMAN Bifunctional glutamate/proline--tRNA ligase
P07858	CTSB	0.02627	0.00719	26.3855	3	CATB_HUMAN Cathepsin B
P07900-2	HSP90AA1	0.06444	0.00536	10.7565	19	HS90A_HUMAN Isoform 2 of Heat shock protein HSP 90-alpha
P07910	HNRNPC	0.09293	0.01032	7.45881	1	HNRPC_HUMAN Heterogeneous nuclear ribonucleoproteins C1/C2
P07954	FH	0.13282	0.00578	5.2187	5	FUMH_HUMAN Fumarate hydratase, mitochondrial
P08047	SP1	0.06032	0.00618	11.4912	2	SP1_HUMAN Transcription factor Sp1
P08107	HSPA1A	0.07465	0.00743	9.28529	18	HSP71_HUMAN Heat shock 70 kDa protein 1A/1B
P08134	RHOC	0.04843	0.00685	14.3124	3	RHOC_HUMAN Rho-related GTP-binding protein RhoC
P08195-4	SLC3A2	0.07792	0.00632	8.89563	2	4F2_HUMAN Isoform 4 of 4F2 cell-surface antigen heavy chain
P08236	GUSB	0.26733	0.01604	2.59285	1	BGLR_HUMAN Beta-glucuronidase
P08237-3	PFKM	0.10539	0.01719	6.57697	2	K6PF_HUMAN Isoform 3 of 6-phosphofructokinase, muscle type
P08238	HSP90AB1	0.08849	0.01264	7.83306	12	HS90B_HUMAN Heat shock protein HSP 90-beta
P08240	SRPR	0.05506	0.0035	12.5889	4	SRPR_HUMAN Signal recognition particle receptor subunit alpha
P08243	ASNS	0.07204	0.00746	9.6217	8	ASNS_HUMAN Asparagine synthetase [glutamine-hydrolyzing]
P08397	HMBS	0.15166	0.01919	4.5704	1	HEM3_HUMAN Porphobilinogen deaminase
P08559-4	PDHA1	0.12876	0.00807	5.38325	3	ODPA_HUMAN Isoform 4 of Pyruvate dehydrogenase E1 component subunit alpha, somatic form, mitochondrial
P08574	CYC1	0.0733	0.00726	9.45631	1	CY1_HUMAN Cytochrome c1, heme protein, mitochondrial
P08579	SNRPB2	0.15368	0.01973	4.51033	2	RU2B_HUMAN U2 small nuclear ribonucleoprotein B''
P08621	SNRNP70	0.0629	0.00292	11.0198	4	RU17_HUMAN U1 small nuclear ribonucleoprotein 70 kDa
P08651	NFIC	0.08002	0.00466	8.66217	2	NFIC_HUMAN Nuclear factor 1 C-type
P08670	VIM	0.12043	0.01989	5.7556	2	VIME_HUMAN Vimentin
P08754	GNAI3	0.08487	0.0088	8.16716	2	GNAI3_HUMAN Guanine nucleotide-binding protein G(k) subunit alpha
P08758	ANXA5	0.04391	0.00343	15.7856	7	ANXA5_HUMAN Annexin A5
P08865	RPSA	0.0767	0.01171	9.03712	4	RSSA_HUMAN 40S ribosomal protein SA
P08962	CD63	0.08108	0.00627	8.54893	3	CD63_HUMAN CD63 antigen
P09001	MRPL3	0.12285	0.01721	5.64222	2	RM03_HUMAN 39S ribosomal protein L3, mitochondrial
P09012	SNRPA	0.06636	0.00691	10.4453	4	SNRPA_HUMAN U1 small nuclear ribonucleoprotein A
P09110	ACAA1	0.04962	0.00414	13.9691	2	THIK_HUMAN 3-ketoacyl-CoA thiolase, peroxisomal
P09132	SRP19	0.04807	0.00383	14.4195	3	SRP19_HUMAN Signal recognition particle 19 kDa protein
P09234	SNRPC	0.05082	0.00598	13.6393	2	RU1C_HUMAN U1 small nuclear ribonucleoprotein C
P09382	LGALS1	0.05313	0.00668	13.0462	1	LEG1_HUMAN Galectin-1
P09429	HMGB1	0.02536	0.00479	27.3323	7	HMGB1_HUMAN High mobility group protein B1
P09467	FBP1	0.05837	0.00532	11.8751	4	F16P1_HUMAN Fructose-1,6-bisphosphatase 1
P09493-8	TPM1	0.05214	0.00854	13.294	1	TPM1_HUMAN Isoform 8 of Tropomyosin alpha-1 chain
P09493-9	TPM1	0.08027	0.00371	8.6352	5	TPM1_HUMAN Isoform 9 of Tropomyosin alpha-1 chain
P09496	CLTA	0.0626	0.00636	11.0726	1	CLCA_HUMAN Clathrin light chain A
P09525	ANXA4	0.06532	0.00868	10.6116	5	ANXA4_HUMAN Annexin A4
P09543	CNP	0.07001	0.00431	9.90069	4	CN37_HUMAN 2',3'-cyclic-nucleotide 3'-phosphodiesterase
P09622	DLD	0.09854	0.01234	7.03417	10	DLDH_HUMAN Dihydrolipoyl dehydrogenase, mitochondrial
P09651	HNRNPA1	0.06673	0.00394	10.3873	5	ROA1_HUMAN Heterogeneous nuclear ribonucleoprotein A1
P09661	SNRPA1	0.09924	0.00482	6.98455	6	RU2A_HUMAN U2 small nuclear ribonucleoprotein A'
P09669	COX6C	0.50032	0.1094	1.38541	4	COX6C_HUMAN Cytochrome c oxidase subunit 6C
P09874	PARP1	0.03202	0.01159	21.6473	11	PARP1_HUMAN Poly [ADP-ribose] polymerase 1
P09914	IFIT1	0.08716	0.00704	7.95258	2	IFIT1_HUMAN Interferon-induced protein with tetratricopeptide repeats 1
P09960	LTA4H	0.03133	0.00441	22.1241	3	LKHA4_HUMAN Leukotriene A-4 hydrolase
P0C7X2	ZNF688	0.06622	0.00413	10.4673	1	ZN688_HUMAN Zinc finger protein 688
P0CG08	GPR89B	0.06542	0.00539	10.5953	2	GPHRB_HUMAN Golgi pH regulator B
P0CG48	UBC	0.1157	0.00883	5.9909	3	UBC_HUMAN Polyubiquitin-C
P0CW22	RPS17L	0.11609	0.02543	5.97077	4	RS17L_HUMAN 40S ribosomal protein S17-like
P10155	TROVE2	0.11522	0.0107	6.01586	3	RO60_HUMAN 60 kDa SS-A/Ro ribonucleoprotein
P10244	MYBL2	0.11082	0.00758	6.25471	1	MYBB_HUMAN Myb-related protein B
P10316	HLA-A	0.09189	0.0128	7.54323	2	1A69_HUMAN HLA class I histocompatibility antigen, A-69 alpha chain
P10599	TXN	0.06112	0.00928	11.3408	1	THIO_HUMAN Thioredoxin
P10606	COX5B	0.16473	0.00631	4.20778	1	COX5B_HUMAN Cytochrome c oxidase subunit 5B, mitochondrial
P10619	CTSA	0.13132	0.01654	5.27831	3	PPGB_HUMAN Lysosomal protective protein
P10620	MGST1	0.04557	0.00399	15.2106	1	MGST1_HUMAN Microsomal glutathione S-transferase 1
P10644	PRKAR1A	0.12133	0.00585	5.71291	3	KAP0_HUMAN cAMP-dependent protein kinase type I-alpha regulatory subunit
P10768	ESD	0.0475	0.00432	14.5926	5	ESTD_HUMAN S-formylglutathione hydrolase
P10809	HSPD1	0.055	0.00668	12.6027	20	CH60_HUMAN 60 kDa heat shock protein, mitochondrial
P10909-2	CLU	0.17138	0.00809	4.0445	8	CLUS_HUMAN Isoform 2 of Clusterin
P11021	HSPA5	0.02699	0.00723	25.6816	17	GRP78_HUMAN 78 kDa glucose-regulated protein
P11142	HSPA8	0.07282	0.00299	9.51864	19	HSP7C_HUMAN Heat shock cognate 71 kDa protein
P11172	UMPS	0.05989	0.00784	11.5737	3	UMPS_HUMAN Uridine 5'-monophosphate synthase
P11177	PDHB	0.0878	0.00756	7.89461	2	ODPB_HUMAN Pyruvate dehydrogenase E1 component subunit beta, mitochondrial
P11182	DBT	0.09893	0.00469	7.00644	1	ODB2_HUMAN Lipoamide acyltransferase component of branched-chain alpha-keto acid dehydrogenase complex, mitochondrial
P11233	RALA	0.06063	0.00436	11.4324	3	RALA_HUMAN Ras-related protein Ral-A
P11234	RALB	0.05211	0.00838	13.3016	3	RALB_HUMAN Ras-related protein Ral-B
P11387	TOP1	0.06222	0.00436	11.1403	14	TOP1_HUMAN DNA topoisomerase 1
P11388-4	TOP2A	0.11133	0.003	6.22606	2	TOP2A_HUMAN Isoform 4 of DNA topoisomerase 2-alpha
P11413-2	G6PD	0.07871	0.01077	8.80634	8	G6PD_HUMAN Isoform Long of Glucose-6-phosphate 1-dehydrogenase
P11474	ESRRA	0.1159	0.01167	5.98056	1	ERR1_HUMAN Steroid hormone receptor ERR1
P11586	MTHFD1	0.06225	0.00454	11.1349	6	C1TC_HUMAN C-1-tetrahydrofolate synthase, cytoplasmic
P11908-2	PRPS2	0.10051	0.01316	6.8963	1	PRPS2_HUMAN Isoform 2 of Ribose-phosphate pyrophosphokinase 2
P11940	PABPC1	0.09932	0.00822	6.97893	11	PABP1_HUMAN Polyadenylate-binding protein 1
P12004	PCNA	0.03602	0.00892	19.2434	1	PCNA_HUMAN Proliferating cell nuclear antigen
P12081	HARS	0.0618	0.00555	11.216	3	SYHC_HUMAN Histidine--tRNA ligase, cytoplasmic
P12235	SLC25A4	0.14391	0.01726	4.81653	2	ADT1_HUMAN ADP/ATP translocase 1
P12236	SLC25A6	0.03955	0.00493	17.5258	6	ADT3_HUMAN ADP/ATP translocase 3
P12268	IMPDH2	0.07807	0.01118	8.87853	5	IMDH2_HUMAN Inosine-5'-monophosphate dehydrogenase 2
P12270	TPR	0.23506	0.02396	2.94881	3	TPR_HUMAN Nucleoprotein TPR
P12814-4	ACTN1	0.05208	0.01358	13.3093	8	ACTN1_HUMAN Isoform 4 of Alpha-actinin-1
P12956	XRCC6	0.05444	0.00465	12.7323	12	XRCC6_HUMAN X-ray repair cross-complementing protein 6
P13010	XRCC5	0.10498	0.00721	6.60266	6	XRCC5_HUMAN X-ray repair cross-complementing protein 5
P13051	UNG	0.09938	0.00553	6.97472	5	UNG_HUMAN Uracil-DNA glycosylase
P13073	COX4I1	0.1366	0.01269	5.07428	8	COX41_HUMAN Cytochrome c oxidase subunit 4 isoform 1, mitochondrial
P13498	CYBA	0.28464	0.03028	2.43517	3	CY24A_HUMAN Cytochrome b-245 light chain
P13639	EEF2	0.1241	0.01385	5.58539	18	EF2_HUMAN Elongation factor 2
P13640	MT1G	0.05572	0.00682	12.4398	1	MT1G_HUMAN Metallothionein-1G
P13667	PDIA4	0.03228	0.01557	21.473	9	PDIA4_HUMAN Protein disulfide-isomerase A4
P13674	P4HA1	0.06116	0.0116	11.3333	4	P4HA1_HUMAN Prolyl 4-hydroxylase subunit alpha-1
P13693	TPT1	0.13221	0.01164	5.24277	2	TCTP_HUMAN Translationally-controlled tumor protein
P13798	APEH	0.14314	0.01877	4.84244	1	ACPH_HUMAN Acylamino-acid-releasing enzyme
P13804	ETFA	0.04012	0.00638	17.2768	5	ETFA_HUMAN Electron transfer flavoprotein subunit alpha, mitochondrial
P13929	ENO3	0.04654	0.00626	14.8936	4	ENOB_HUMAN Beta-enolase
P13984	GTF2F2	0.06362	0.00362	10.8951	2	T2FB_HUMAN General transcription factor IIF subunit 2
P13995	MTHFD2	0.12219	0.00804	5.6727	5	MTDC_HUMAN Bifunctional methylenetetrahydrofolate dehydrogenase/cyclohydrolase, mitochondrial
P14174	MIF	0.04932	0.00987	14.0541	1	MIF_HUMAN Macrophage migration inhibitory factor
P14314	PRKCSH	0.0578	0.01398	11.9922	1	GLU2B_HUMAN Glucosidase 2 subunit beta
P14324	FDPS	0.07384	0.01202	9.38715	2	FPPS_HUMAN Farnesyl pyrophosphate synthase
P14406	COX7A2	0.12035	0.0187	5.75943	1	CX7A2_HUMAN Cytochrome c oxidase subunit 7A2, mitochondrial
P14550	AKR1A1	0.06012	0.00441	11.5294	3	AK1A1_HUMAN Alcohol dehydrogenase [NADP(+)]
P14618	PKM	0.03955	0.00685	17.5258	1	KPYM_HUMAN Pyruvate kinase PKM
P14618-2	PKM	0.06332	0.00461	10.9467	10	KPYM_HUMAN Isoform M1 of Pyruvate kinase PKM
P14625	HSP90B1	0.05804	0.00648	11.9426	7	ENPL_HUMAN Endoplasmin
P14635	CCNB1	0.21091	0.02167	3.28646	2	CCNB1_HUMAN G2/mitotic-specific cyclin-B1
P14678-3	SNRPB	0.1134	0.01723	6.11241	2	RSMB_HUMAN Isoform SM-B1 of Small nuclear ribonucleoprotein-associated proteins B and B'
P14866	HNRNPL	0.07432	0.00581	9.32652	8	HNRPL_HUMAN Heterogeneous nuclear ribonucleoprotein L
P14868	DARS	0.09229	0.01014	7.51053	5	SYDC_HUMAN Aspartate--tRNA ligase, cytoplasmic
P14927-2	UQCRB	0.14737	0.02303	4.70345	5	QCR7_HUMAN Isoform 2 of Cytochrome b-c1 complex subunit 7
P15170-3	GSPT1	0.06927	0.00476	10.0065	4	ERF3A_HUMAN Isoform 3 of Eukaryotic peptide chain release factor GTP-binding subunit ERF3A
P15291	B4GALT1	0.1041	0.00668	6.65847	1	B4GT1_HUMAN Beta-1,4-galactosyltransferase 1
P15311	EZR	0.04616	0.0069	15.0162	6	EZRI_HUMAN Ezrin
P15408	FOSL2	0.20839	0.01468	3.3262	4	FOSL2_HUMAN Fos-related antigen 2
P15514	AREG	0.31259	0.03252	2.21743	3	AREG_HUMAN Amphiregulin
P15559	NQO1	0.15301	0.02332	4.53008	7	NQO1_HUMAN NAD(P)H dehydrogenase [quinone] 1
P15586	GNS	0.1617	0.01575	4.28662	1	GNS_HUMAN N-acetylglucosamine-6-sulfatase
P15880	RPS2	0.13084	0.03068	5.29767	10	RS2_HUMAN 40S ribosomal protein S2
P15927-3	RPA2	0.0332	0.0161	20.8779	3	RFA2_HUMAN Isoform 3 of Replication protein A 32 kDa subunit
P16152	CBR1	0.05416	0.0056	12.7981	5	CBR1_HUMAN Carbonyl reductase [NADPH] 1
P16401	HIST1H1B	0.02874	0.01641	24.1179	5	H15_HUMAN Histone H1.5
P16402	HIST1H1D	0.03461	0.01222	20.0274	4	H13_HUMAN Histone H1.3
P16403	HIST1H1C	0.04132	0.02059	16.7751	2	H12_HUMAN Histone H1.2
P16435	POR	0.0585	0.00404	11.8487	4	NCPR_HUMAN NADPH--cytochrome P450 reductase
P16455	MGMT	0.05977	0.00346	11.5969	1	MGMT_HUMAN Methylated-DNA--protein-cysteine methyltransferase
P16615	ATP2A2	0.07922	0.0039	8.74965	5	AT2A2_HUMAN Sarcoplasmic/endoplasmic reticulum calcium ATPase 2
P16989	YBX3	0.07321	0.00828	9.46793	4	YBOX3_HUMAN Y-box-binding protein 3
P17010	ZFX	0.06445	0.00418	10.7548	2	ZFX_HUMAN Zinc finger X-chromosomal protein
P17029	ZKSCAN1	0.11557	0.00616	5.99764	1	ZKSC1_HUMAN Zinc finger protein with KRAB and SCAN domains 1
P17252	PRKCA	0.05363	0.00569	12.9246	2	KPCA_HUMAN Protein kinase C alpha type
P17275	JUNB	0.32673	0.02752	2.12147	3	JUNB_HUMAN Transcription factor jun-B
P17480	UBTF	0.06138	0.00241	11.2927	5	UBF1_HUMAN Nucleolar transcription factor 1
P17568	NDUFB7	0.2818	0.05229	2.45971	2	NDUB7_HUMAN NADH dehydrogenase [ubiquinone] 1 beta subcomplex subunit 7
P17612	PRKACA	0.0752	0.00575	9.21738	2	KAPCA_HUMAN cAMP-dependent protein kinase catalytic subunit alpha
P17676	CEBPB	0.13493	0.00525	5.13709	2	CEBPB_HUMAN CCAAT/enhancer-binding protein beta
P17706	PTPN2	0.05201	0.00713	13.3272	2	PTN2_HUMAN Tyrosine-protein phosphatase non-receptor type 2
P17812	CTPS1	0.03315	0.0023	20.9094	5	PYRG1_HUMAN CTP synthase 1
P17844	DDX5	0.06814	0.00668	10.1724	11	DDX5_HUMAN Probable ATP-dependent RNA helicase DDX5
P17858-2	PFKL	0.11823	0.02334	5.8627	5	K6PL_HUMAN Isoform 2 of 6-phosphofructokinase, liver type
P17931	LGALS3	0.05712	0.00795	12.1349	2	LEG3_HUMAN Galectin-3
P17980	PSMC3	0.17267	0.02106	4.01429	5	PRS6A_HUMAN 26S protease regulatory subunit 6A
P17987	TCP1	0.02987	0.00563	23.2055	5	TCPA_HUMAN T-complex protein 1 subunit alpha
P18031	PTPN1	0.05281	0.00352	13.1253	8	PTN1_HUMAN Tyrosine-protein phosphatase non-receptor type 1
P18065	IGFBP2	0.9782	0.23687	0.708595	1	IBP2_HUMAN Insulin-like growth factor-binding protein 2
P18077	RPL35A	0.09045	0.01525	7.66332	3	RL35A_HUMAN 60S ribosomal protein L35a
P18084	ITGB5	0.08978	0.00485	7.72051	1	ITB5_HUMAN Integrin beta-5
P18124	RPL7	0.05368	0.01497	12.9126	2	RL7_HUMAN 60S ribosomal protein L7
P18146	EGR1	0.35751	0.06372	1.93882	1	EGR1_HUMAN Early growth response protein 1
P18206	VCL	0.05136	0.00445	13.4959	26	VINC_HUMAN Vinculin
P18583-9	SON	0.05716	0.00919	12.1264	8	SON_HUMAN Isoform I of Protein SON
P18615	NELFE	0.04916	0.01111	14.0998	4	NELFE_HUMAN Negative elongation factor E
P18621-3	RPL17	0.09514	0.01376	7.28555	3	RL17_HUMAN Isoform 3 of 60S ribosomal protein L17
P18669	PGAM1	0.0411	0.0074	16.8649	4	PGAM1_HUMAN Phosphoglycerate mutase 1
P18827	SDC1	0.1382	0.00876	5.01554	1	SDC1_HUMAN Syndecan-1
P18858	LIG1	0.04938	0.00892	14.037	11	DNLI1_HUMAN DNA ligase 1
P19338	NCL	0.06389	0.00455	10.8491	19	NUCL_HUMAN Nucleolin
P19367-3	HK1	0.04808	0.00684	14.4165	9	HXK1_HUMAN Isoform 3 of Hexokinase-1
P19404	NDUFV2	0.16269	0.01719	4.26054	3	NDUV2_HUMAN NADH dehydrogenase [ubiquinone] flavoprotein 2, mitochondrial
P19419	ELK1	0.15126	0.00616	4.58249	1	ELK1_HUMAN ETS domain-containing protein Elk-1
P19447	ERCC3	0.16664	0.02188	4.15955	2	ERCC3_HUMAN TFIIH basal transcription factor complex helicase XPB subunit
P19525	EIF2AK2	0.05584	0.00643	12.4131	8	E2AK2_HUMAN Interferon-induced, double-stranded RNA-activated protein kinase
P19784	CSNK2A2	0.04789	0.00265	14.4737	2	CSK22_HUMAN Casein kinase II subunit alpha'
P19838-2	NFKB1	0.06765	0.00877	10.2461	1	NFKB1_HUMAN Isoform 2 of Nuclear factor NF-kappa-B p105 subunit
P20042	EIF2S2	0.0548	0.0048	12.6487	8	IF2B_HUMAN Eukaryotic translation initiation factor 2 subunit 2
P20290	BTF3	0.08837	0.00544	7.84369	6	BTF3_HUMAN Transcription factor BTF3
P20339	RAB5A	0.05513	0.00526	12.573	2	RAB5A_HUMAN Ras-related protein Rab-5A
P20340-2	RAB6A	0.05718	0.00408	12.1222	3	RAB6A_HUMAN Isoform 2 of Ras-related protein Rab-6A
P20618	PSMB1	0.718	0.21551	0.965386	2	PSB1_HUMAN Proteasome subunit beta type-1
P20671	HIST1H2AD	0.04397	0.00329	15.7641	1	H2A1D_HUMAN Histone H2A type 1-D
P20674	COX5A	0.08047	0.0063	8.61373	1	COX5A_HUMAN Cytochrome c oxidase subunit 5A, mitochondrial
P20700	LMNB1	0.08172	0.00539	8.48198	1	LMNB1_HUMAN Lamin-B1
P20839-6	IMPDH1	0.06649	0.00569	10.4248	3	IMDH1_HUMAN Isoform 6 of Inosine-5'-monophosphate dehydrogenase 1
P21127	CDK11B	0.09984	0.00373	6.94258	3	CD11B_HUMAN Cyclin-dependent kinase 11B
P21266	GSTM3	0.04579	0.00739	15.1375	7	GSTM3_HUMAN Glutathione S-transferase Mu 3
P21283	ATP6V1C1	0.07782	0.01053	8.90706	11	VATC1_HUMAN V-type proton ATPase subunit C 1
P21291	CSRP1	0.03522	0.00977	19.6805	5	CSRP1_HUMAN Cysteine and glycine-rich protein 1
P21333	FLNA	0.05333	0.0065	12.9973	45	FLNA_HUMAN Filamin-A
P21399	ACO1	0.05289	0.00446	13.1054	1	ACOC_HUMAN Cytoplasmic aconitate hydratase
P21580	TNFAIP3	0.16272	0.01918	4.25975	2	TNAP3_HUMAN Tumor necrosis factor alpha-induced protein 3
P21741	MDK	1.41014	0.56249	0.491545	2	MK_HUMAN Midkine
P21796	VDAC1	0.03604	0.00653	19.2327	12	VDAC1_HUMAN Voltage-dependent anion-selective channel protein 1
P21860	ERBB3	0.16524	0.00734	4.19479	2	ERBB3_HUMAN Receptor tyrosine-protein kinase erbB-3
P21912	SDHB	0.07691	0.00783	9.01245	5	DHSB_HUMAN Succinate dehydrogenase [ubiquinone] iron-sulfur subunit, mitochondrial
P21926	CD9	0.04792	0.01426	14.4647	6	CD9_HUMAN CD9 antigen
P22033	MUT	0.10496	0.00665	6.60392	2	MUTA_HUMAN Methylmalonyl-CoA mutase, mitochondrial
P22059	OSBP	0.07502	0.00657	9.2395	3	OSBP1_HUMAN Oxysterol-binding protein 1
P22061-2	PCMT1	0.0678	0.00947	10.2234	3	PIMT_HUMAN Isoform 2 of Protein-L-isoaspartate(D-aspartate) O-methyltransferase
P22087	FBL	0.05497	0.00456	12.6096	4	FBRL_HUMAN rRNA 2'-O-methyltransferase fibrillarin
P22234-2	PAICS	0.05964	0.02274	11.6222	4	PUR6_HUMAN Isoform 2 of Multifunctional protein ADE2
P22307	SCP2	0.02545	0.01145	27.2356	7	NLTP_HUMAN Non-specific lipid-transfer protein
P22314	UBA1	0.04797	0.00321	14.4496	7	UBA1_HUMAN Ubiquitin-like modifier-activating enzyme 1
P22392-2	NME2	0.04987	0.00535	13.8991	8	NDKB_HUMAN Isoform 3 of Nucleoside diphosphate kinase B
P22570-3	FDXR	0.03532	0.00792	19.6248	2	ADRO_HUMAN Isoform 3 of NADPH:adrenodoxin oxidoreductase, mitochondrial
P22626	HNRNPA2B1	0.04967	0.00292	13.955	6	ROA2_HUMAN Heterogeneous nuclear ribonucleoproteins A2/B1
P22694-2	PRKACB	0.06088	0.00491	11.3855	3	KAPCB_HUMAN Isoform 2 of cAMP-dependent protein kinase catalytic subunit beta
P22695	UQCRC2	0.06495	0.005	10.672	5	QCR2_HUMAN Cytochrome b-c1 complex subunit 2, mitochondrial
P22830-2	FECH	0.08285	0.01164	8.36629	1	HEMH_HUMAN Isoform 2 of Ferrochelatase, mitochondrial
P23193	TCEA1	0.07308	0.00323	9.48477	2	TCEA1_HUMAN Transcription elongation factor A protein 1
P23246	SFPQ	0.07877	0.00627	8.79963	10	SFPQ_HUMAN Splicing factor, proline- and glutamine-rich
P23284	PPIB	0.07892	0.00598	8.78291	9	PPIB_HUMAN Peptidyl-prolyl cis-trans isomerase B
P23381	WARS	0.06948	0.00411	9.97621	5	SYWC_HUMAN Tryptophan--tRNA ligase, cytoplasmic
P23396-2	RPS3	0.12084	0.02161	5.73607	5	RS3_HUMAN Isoform 2 of 40S ribosomal protein S3
P23443	RPS6KB1	0.09312	0.01258	7.44359	8	KS6B1_HUMAN Ribosomal protein S6 kinase beta-1
P23458	JAK1	0.39223	0.05759	1.7672	2	JAK1_HUMAN Tyrosine-protein kinase JAK1
P23470	PTPRG	0.02328	0.00809	29.7744	1	PTPRG_HUMAN Receptor-type tyrosine-protein phosphatase gamma
P23497	SP100	0.06458	0.00329	10.7332	6	SP100_HUMAN Nuclear autoantigen Sp-100
P23526	AHCY	0.08095	0.01145	8.56266	2	SAHH_HUMAN Adenosylhomocysteinase
P23528	CFL1	0.0681	0.00838	10.1784	11	COF1_HUMAN Cofilin-1
P23588	EIF4B	0.07409	0.00471	9.35548	3	IF4B_HUMAN Eukaryotic translation initiation factor 4B
P23763	VAMP1	0.03899	0.00568	17.7776	1	VAMP1_HUMAN Vesicle-associated membrane protein 1
P23771-2	GATA3	0.10738	0.01159	6.45509	1	GATA3_HUMAN Isoform 2 of Trans-acting T-cell-specific transcription factor GATA-3
P23786	CPT2	0.04686	0.00625	14.7919	5	CPT2_HUMAN Carnitine O-palmitoyltransferase 2, mitochondrial
P23919	DTYMK	0.05327	0.00469	13.012	2	KTHY_HUMAN Thymidylate kinase
P23921	RRM1	0.12213	0.01199	5.67549	3	RIR1_HUMAN Ribonucleoside-diphosphate reductase large subunit
P24390	KDELR1	0.03763	0.00558	18.4201	1	ERD21_HUMAN ER lumen protein retaining receptor 1
P24468	NR2F2	0.10801	0.009	6.41744	1	COT2_HUMAN COUP transcription factor 2
P24534	EEF1B2	0.056	0.00158	12.3776	2	EF1B_HUMAN Elongation factor 1-beta
P24539	ATP5F1	0.06273	0.0084	11.0497	6	AT5F1_HUMAN ATP synthase F(0) complex subunit B1, mitochondrial
P24666	ACP1	0.04926	0.00643	14.0712	2	PPAC_HUMAN Low molecular weight phosphotyrosine protein phosphatase
P24752	ACAT1	0.07321	0.00995	9.46793	5	THIL_HUMAN Acetyl-CoA acetyltransferase, mitochondrial
P24941	CDK2	0.05968	0.00202	11.6144	4	CDK2_HUMAN Cyclin-dependent kinase 2
P25205	MCM3	0.06599	0.00165	10.5038	2	MCM3_HUMAN DNA replication licensing factor MCM3
P25398	RPS12	0.05665	0.00502	12.2356	2	RS12_HUMAN 40S ribosomal protein S12
P25440-2	BRD2	0.16834	0.01302	4.11754	6	BRD2_HUMAN Isoform 2 of Bromodomain-containing protein 2
P25490	YY1	0.0651	0.00555	10.6474	4	TYY1_HUMAN Transcriptional repressor protein YY1
P25685	DNAJB1	0.08636	0.0075	8.02625	8	DNJB1_HUMAN DnaJ homolog subfamily B member 1
P25705	ATP5A1	0.06807	0.00491	10.1829	9	ATPA_HUMAN ATP synthase subunit alpha, mitochondrial
P25786-2	PSMA1	0.34684	0.06225	1.99846	2	PSA1_HUMAN Isoform Long of Proteasome subunit alpha type-1
P25788	PSMA3	0.40667	0.05558	1.70445	5	PSA3_HUMAN Proteasome subunit alpha type-3
P25789	PSMA4	0.35182	0.04844	1.97018	6	PSA4_HUMAN Proteasome subunit alpha type-4
P26196	DDX6	0.06773	0.00609	10.234	6	DDX6_HUMAN Probable ATP-dependent RNA helicase DDX6
P26232	CTNNA2	0.10389	0.00579	6.67193	6	CTNA2_HUMAN Catenin alpha-2
P26358-2	DNMT1	0.03451	0.02025	20.0854	8	DNMT1_HUMAN Isoform 2 of DNA (cytosine-5)-methyltransferase 1
P26368	U2AF2	0.05522	0.00467	12.5525	8	U2AF2_HUMAN Splicing factor U2AF 65 kDa subunit
P26373	RPL13	0.12495	0.02335	5.5474	5	RL13_HUMAN 60S ribosomal protein L13
P26440	IVD	0.13595	0.00569	5.09854	2	IVD_HUMAN Isovaleryl-CoA dehydrogenase, mitochondrial
P26583	HMGB2	0.03931	0.00686	17.6328	7	HMGB2_HUMAN High mobility group protein B2
P26599-3	PTBP1	0.0548	0.00569	12.6487	6	PTBP1_HUMAN Isoform 3 of Polypyrimidine tract-binding protein 1
P26640	VARS	0.04842	0.00247	14.3153	7	SYVC_HUMAN Valine--tRNA ligase
P26641	EEF1G	0.04956	0.00164	13.986	8	EF1G_HUMAN Elongation factor 1-gamma
P26885	FKBP2	0.02886	0.00675	24.0176	3	FKBP2_HUMAN Peptidyl-prolyl cis-trans isomerase FKBP2
P27105	STOM	0.06059	0.00574	11.44	2	STOM_HUMAN Erythrocyte band 7 integral membrane protein
P27144	AK4	0.0394	0.00502	17.5926	3	KAD4_HUMAN Adenylate kinase 4, mitochondrial
P27348	YWHAQ	0.05068	0.00623	13.6769	4	1433T_HUMAN 14-3-3 protein theta
P27361	MAPK3	0.06891	0.00816	10.0587	2	MK03_HUMAN Mitogen-activated protein kinase 3
P27448-7	MARK3	0.09374	0.01143	7.39436	3	MARK3_HUMAN Isoform 6 of MAP/microtubule affinity-regulating kinase 3
P27635	RPL10	0.12729	0.01818	5.44542	3	RL10_HUMAN 60S ribosomal protein L10
P27694	RPA1	0.05739	0.00319	12.0778	7	RFA1_HUMAN Replication protein A 70 kDa DNA-binding subunit
P27695	APEX1	0.03878	0.00229	17.8738	4	APEX1_HUMAN DNA-(apurinic or apyrimidinic site) lyase
P27797	CALR	0.04496	0.00818	15.417	6	CALR_HUMAN Calreticulin
P27816	MAP4	0.05998	0.00423	11.5563	11	MAP4_HUMAN Microtubule-associated protein 4
P27824	CANX	0.04512	0.00911	15.3623	4	CALX_HUMAN Calnexin
P27986-4	PIK3R1	0.13796	0.03498	5.02426	1	P85A_HUMAN Isoform 4 of Phosphatidylinositol 3-kinase regulatory subunit alpha
P28288	ABCD3	0.04094	0.00765	16.9308	1	ABCD3_HUMAN ATP-binding cassette sub-family D member 3
P28331-2	NDUFS1	0.19218	0.01282	3.60676	2	NDUS1_HUMAN Isoform 2 of NADH-ubiquinone oxidoreductase 75 kDa subunit, mitochondrial
P28482	MAPK1	0.07115	0.00751	9.74205	2	MK01_HUMAN Mitogen-activated protein kinase 1
P28676	GCA	0.10728	0.01935	6.4611	1	GRAN_HUMAN Grancalcin
P28702-3	RXRB	0.08117	0.00638	8.53945	3	RXRB_HUMAN Isoform 2 of Retinoic acid receptor RXR-beta
P28838	LAP3	0.07466	0.00308	9.28405	8	AMPL_HUMAN Cytosol aminopeptidase
P29083	GTF2E1	0.05906	0.00414	11.7363	1	T2EA_HUMAN General transcription factor IIE subunit 1
P29084	GTF2E2	0.05156	0.00896	13.4435	9	T2EB_HUMAN Transcription initiation factor IIE subunit beta
P29144	TPP2	0.06338	0.00367	10.9364	1	TPP2_HUMAN Tripeptidyl-peptidase 2
P29317	EPHA2	0.11919	0.00621	5.81548	1	EPHA2_HUMAN Ephrin type-A receptor 2
P29350-4	PTPN6	0.05447	0.00714	12.7253	2	PTN6_HUMAN Isoform 4 of Tyrosine-protein phosphatase non-receptor type 6
P29372	MPG	0.09668	0.01093	7.1695	1	3MG_HUMAN DNA-3-methyladenine glycosylase
P29373	CRABP2	0.06099	0.0104	11.3649	3	RABP2_HUMAN Cellular retinoic acid-binding protein 2
P29401-2	TKT	0.14495	0.01779	4.78197	9	TKT_HUMAN Isoform 2 of Transketolase
P29692-2	EEF1D	0.06137	0.00421	11.2946	4	EF1D_HUMAN Isoform 2 of Elongation factor 1-delta
P29992	GNA11	0.066	0.00629	10.5022	4	GNA11_HUMAN Guanine nucleotide-binding protein subunit alpha-11
P30038	ALDH4A1	0.0529	0.00586	13.103	6	AL4A1_HUMAN Delta-1-pyrroline-5-carboxylate dehydrogenase, mitochondrial
P30040	ERP29	0.05466	0.00178	12.6811	8	ERP29_HUMAN Endoplasmic reticulum resident protein 29
P30041	PRDX6	0.06528	0.00341	10.6181	5	PRDX6_HUMAN Peroxiredoxin-6
P30042	C21orf33	0.03902	0.00808	17.7639	3	ES1_HUMAN ES1 protein homolog, mitochondrial
P30043	BLVRB	0.07936	0.01219	8.73421	2	BLVRB_HUMAN Flavin reductase (NADPH)
P30044	PRDX5	0.02659	0.01019	26.068	5	PRDX5_HUMAN Peroxiredoxin-5, mitochondrial
P30048	PRDX3	0.03823	0.00486	18.131	1	PRDX3_HUMAN Thioredoxin-dependent peroxide reductase, mitochondrial
P30050	RPL12	0.22988	0.03779	3.01526	7	RL12_HUMAN 60S ribosomal protein L12
P30084	ECHS1	0.12237	0.0059	5.66436	10	ECHM_HUMAN Enoyl-CoA hydratase, mitochondrial
P30085	CMPK1	0.04143	0.00322	16.7306	3	KCY_HUMAN UMP-CMP kinase
P30086	PEBP1	0.00525	0.01078	132.028	5	PEBP1_HUMAN Phosphatidylethanolamine-binding protein 1
P30101	PDIA3	0.04907	0.00308	14.1257	15	PDIA3_HUMAN Protein disulfide-isomerase A3
P30153	PPP2R1A	0.10544	0.00885	6.57385	7	2AAA_HUMAN Serine/threonine-protein phosphatase 2A 65 kDa regulatory subunit A alpha isoform
P30405	PPIF	0.04524	0.00474	15.3216	3	PPIF_HUMAN Peptidyl-prolyl cis-trans isomerase F, mitochondrial
P30419	NMT1	0.04754	0.00262	14.5803	4	NMT1_HUMAN Glycylpeptide N-tetradecanoyltransferase 1
P30519	HMOX2	0.05631	0.00524	12.3095	4	HMOX2_HUMAN Heme oxygenase 2
P30520	ADSS	0.03931	0.00485	17.6328	1	PURA2_HUMAN Adenylosuccinate synthetase isozyme 2
P30613	PKLR	0.06759	0.00658	10.2552	1	KPYR_HUMAN Pyruvate kinase PKLR
P30626	SRI	0.06251	0.0131	11.0886	2	SORCN_HUMAN Sorcin
P30740	SERPINB1	0.04708	0.00458	14.7228	2	ILEU_HUMAN Leukocyte elastase inhibitor
P31146	CORO1A	0.11363	0.00745	6.10004	2	COR1A_HUMAN Coronin-1A
P31150	GDI1	0.0312	0.00469	22.2163	3	GDIA_HUMAN Rab GDP dissociation inhibitor alpha
P31153	MAT2A	0.09688	0.00744	7.1547	6	METK2_HUMAN S-adenosylmethionine synthase isoform type-2
P31350-2	RRM2	0.18122	0.01921	3.82489	3	RIR2_HUMAN Isoform 2 of Ribonucleoside-diphosphate reductase subunit M2
P31431	SDC4	0.1474	0.00625	4.70249	1	SDC4_HUMAN Syndecan-4
P31483	TIA1	0.09039	0.01271	7.66841	1	TIA1_HUMAN Nucleolysin TIA-1 isoform p40
P31641	SLC6A6	0.19145	0.01846	3.62051	1	SC6A6_HUMAN Sodium- and chloride-dependent taurine transporter
P31689	DNAJA1	0.13467	0.012	5.14701	8	DNJA1_HUMAN DnaJ homolog subfamily A member 1
P31749	AKT1	0.06353	0.00218	10.9105	2	AKT1_HUMAN RAC-alpha serine/threonine-protein kinase
P31751	AKT2	0.06467	0.00717	10.7182	3	AKT2_HUMAN RAC-beta serine/threonine-protein kinase
P31930	UQCRC1	0.03328	0.00678	20.8277	1	QCR1_HUMAN Cytochrome b-c1 complex subunit 1, mitochondrial
P31939	ATIC	0.06855	0.00594	10.1116	5	PUR9_HUMAN Bifunctional purine biosynthesis protein PURH
P31943	HNRNPH1	0.0354	0.00884	19.5804	1	HNRH1_HUMAN Heterogeneous nuclear ribonucleoprotein H
P31946	YWHAB	0.05323	0.000964137	13.0217	2	1433B_HUMAN 14-3-3 protein beta/alpha
P31948	STIP1	0.05471	0.00365	12.6695	18	STIP1_HUMAN Stress-induced-phosphoprotein 1
P31949	S100A11	0.09697	0.01255	7.14806	3	S10AB_HUMAN Protein S100-A11
P32121-4	ARRB2	0.05504	0.00393	12.5935	2	ARRB2_HUMAN Isoform 4 of Beta-arrestin-2
P32322	PYCR1	0.06919	0.00452	10.018	1	P5CR1_HUMAN Pyrroline-5-carboxylate reductase 1, mitochondrial
P32519	ELF1	0.2589	0.02551	2.67728	1	ELF1_HUMAN ETS-related transcription factor Elf-1
P32969	RPL9	0.09327	0.01698	7.43162	3	RL9_HUMAN 60S ribosomal protein L9
P33121	ACSL1	0.06596	0.00466	10.5086	1	ACSL1_HUMAN Long-chain-fatty-acid--CoA ligase 1
P33176	KIF5B	0.05825	0.00984	11.8995	10	KINH_HUMAN Kinesin-1 heavy chain
P33316	DUT	0.04237	0.00347	16.3594	1	DUT_HUMAN Deoxyuridine 5'-triphosphate nucleotidohydrolase, mitochondrial
P33552	CKS2	0.70376	0.12962	0.98492	1	CKS2_HUMAN Cyclin-dependent kinases regulatory subunit 2
P33947	KDELR2	0.03577	0.00475	19.3779	2	ERD22_HUMAN ER lumen protein retaining receptor 2
P33981	TTK	0.10377	0.00954	6.67965	2	TTK_HUMAN Dual specificity protein kinase TTK
P33991	MCM4	0.08726	0.00242	7.94347	2	MCM4_HUMAN DNA replication licensing factor MCM4
P33992	MCM5	0.05656	0.00686	12.2551	10	MCM5_HUMAN DNA replication licensing factor MCM5
P33993	MCM7	0.20981	0.02176	3.30369	4	MCM7_HUMAN DNA replication licensing factor MCM7
P34897	SHMT2	0.04797	0.0053	14.4496	5	GLYM_HUMAN Serine hydroxymethyltransferase, mitochondrial
P35080-2	PFN2	0.11551	0.01696	6.00075	1	PROF2_HUMAN Isoform IIb of Profilin-2
P35221-2	CTNNA1	0.10708	0.00472	6.47317	19	CTNA1_HUMAN Isoform 2 of Catenin alpha-1
P35226	BMI1	0.071	0.00416	9.76264	1	BMI1_HUMAN Polycomb complex protein BMI-1
P35227	PCGF2	0.05969	0.00594	11.6125	1	PCGF2_HUMAN Polycomb group RING finger protein 2
P35237	SERPINB6	0.04735	0.00459	14.6388	1	SPB6_HUMAN Serpin B6
P35240-2	NF2	0.05786	0.00625	11.9797	3	MERL_HUMAN Isoform 2 of Merlin
P35241-5	RDX	0.03936	0.00569	17.6104	12	RADI_HUMAN Isoform 5 of Radixin
P35249	RFC4	0.05781	0.00664	11.9901	5	RFC4_HUMAN Replication factor C subunit 4
P35250	RFC2	0.1169	0.01443	5.9294	1	RFC2_HUMAN Replication factor C subunit 2
P35251	RFC1	0.08115	0.00342	8.54155	4	RFC1_HUMAN Replication factor C subunit 1
P35268	RPL22	0.16474	0.02472	4.20752	2	RL22_HUMAN 60S ribosomal protein L22
P35269	GTF2F1	0.07256	0.00559	9.55275	5	T2FA_HUMAN General transcription factor IIF subunit 1
P35270	SPR	0.0576	0.00808	12.0338	3	SPRE_HUMAN Sepiapterin reductase
P35579	MYH9	0.09701	0.00762	7.14511	6	MYH9_HUMAN Myosin-9
P35606	COPB2	0.06273	0.00537	11.0497	8	COPB2_HUMAN Coatomer subunit beta'
P35610	SOAT1	0.08248	0.0077	8.40382	2	SOAT1_HUMAN Sterol O-acyltransferase 1
P35611-3	ADD1	0.23464	0.01046	2.95409	1	ADDA_HUMAN Isoform 3 of Alpha-adducin
P35637	FUS	0.07836	0.00758	8.84568	2	FUS_HUMAN RNA-binding protein FUS
P35658-5	NUP214	0.05701	0.00499	12.1583	3	NU214_HUMAN Isoform 5 of Nuclear pore complex protein Nup214
P35659	DEK	0.03755	0.00445	18.4593	7	DEK_HUMAN Protein DEK
P35749-2	MYH11	0.13007	0.01112	5.32903	2	MYH11_HUMAN Isoform 2 of Myosin-11
P35813-3	PPM1A	0.05978	0.00586	11.595	1	PPM1A_HUMAN Isoform 3 of Protein phosphatase 1A
P35914	HMGCL	0.02921	0.00399	23.7298	4	HMGCL_HUMAN Hydroxymethylglutaryl-CoA lyase, mitochondrial
P35998	PSMC2	0.10803	0.01127	6.41625	4	PRS7_HUMAN 26S protease regulatory subunit 7
P36405	ARL3	0.05303	0.00843	13.0709	4	ARL3_HUMAN ADP-ribosylation factor-like protein 3
P36507	MAP2K2	0.07615	0.00961	9.10239	3	MP2K2_HUMAN Dual specificity mitogen-activated protein kinase kinase 2
P36542	ATP5C1	0.13387	0.00448	5.17776	4	ATPG_HUMAN ATP synthase subunit gamma, mitochondrial
P36543	ATP6V1E1	0.11202	0.01434	6.18771	8	VATE1_HUMAN V-type proton ATPase subunit E 1
P36578	RPL4	0.10158	0.02489	6.82366	6	RL4_HUMAN 60S ribosomal protein L4
P36776	LONP1	0.05834	0.00851	11.8812	7	LONM_HUMAN Lon protease homolog, mitochondrial
P36957	DLST	0.04504	0.01141	15.3896	4	ODO2_HUMAN Dihydrolipoyllysine-residue succinyltransferase component of 2-oxoglutarate dehydrogenase complex, mitochondrial
P36969	GPX4	0.05402	0.00245	12.8313	4	GPX4_HUMAN Phospholipid hydroperoxide glutathione peroxidase, mitochondrial
P37108	SRP14	0.09631	0.01408	7.19704	7	SRP14_HUMAN Signal recognition particle 14 kDa protein
P37198	NUP62	0.08581	0.00475	8.0777	1	NUP62_HUMAN Nuclear pore glycoprotein p62
P37268	FDFT1	0.15966	0.01312	4.3414	1	FDFT_HUMAN Squalene synthase
P37802	TAGLN2	0.05061	0.01722	13.6959	1	TAGL2_HUMAN Transgelin-2
P37837	TALDO1	0.04037	0.0084	17.1699	13	TALDO_HUMAN Transaldolase
P38117-2	ETFB	0.08494	0.00564	8.16043	3	ETFB_HUMAN Isoform 2 of Electron transfer flavoprotein subunit beta
P38159	RBMX	0.03457	0.00787	20.0505	3	RBMX_HUMAN RNA-binding motif protein, X chromosome
P38646	HSPA9	0.06328	0.00775	10.9537	13	GRP75_HUMAN Stress-70 protein, mitochondrial
P38919	EIF4A3	0.07103	0.00408	9.75851	5	IF4A3_HUMAN Eukaryotic initiation factor 4A-III
P39019	RPS19	0.07801	0.013	8.88536	3	RS19_HUMAN 40S ribosomal protein S19
P39023	RPL3	0.2047	0.05137	3.38616	4	RL3_HUMAN 60S ribosomal protein L3
P39210	MPV17	0.04973	0.00536	13.9382	1	MPV17_HUMAN Protein Mpv17
P39656	DDOST	0.09843	0.00572	7.04203	2	OST48_HUMAN Dolichyl-diphosphooligosaccharide--protein glycosyltransferase 48 kDa subunit
P39748	FEN1	0.10565	0.01188	6.56079	9	FEN1_HUMAN Flap endonuclease 1
P39880-3	CUX1	0.04193	0.01499	16.5311	9	CUX1_HUMAN Isoform 3 of Homeobox protein cut-like 1
P40227	CCT6A	0.12392	0.01882	5.59351	7	TCPZ_HUMAN T-complex protein 1 subunit zeta
P40424	PBX1	0.11873	0.00934	5.83801	1	PBX1_HUMAN Pre-B-cell leukemia transcription factor 1
P40429	RPL13A	0.17096	0.03981	4.05444	5	RL13A_HUMAN 60S ribosomal protein L13a
P40616	ARL1	0.05727	0.00834	12.1031	1	ARL1_HUMAN ADP-ribosylation factor-like protein 1
P40763	STAT3	0.06036	0.00565	11.4836	8	STAT3_HUMAN Signal transducer and activator of transcription 3
P40818	USP8	0.0565	0.00597	12.2681	4	UBP8_HUMAN Ubiquitin carboxyl-terminal hydrolase 8
P40925-3	MDH1	0.04312	0.00575	16.0748	11	MDHC_HUMAN Isoform 3 of Malate dehydrogenase, cytoplasmic
P40926	MDH2	0.01404	0.01818	49.3695	12	MDHM_HUMAN Malate dehydrogenase, mitochondrial
P40937	RFC5	0.08785	0.00351	7.89012	1	RFC5_HUMAN Replication factor C subunit 5
P40938	RFC3	0.1212	0.01401	5.71904	1	RFC3_HUMAN Replication factor C subunit 3
P40939	HADHA	0.07575	0.00766	9.15046	12	ECHA_HUMAN Trifunctional enzyme subunit alpha, mitochondrial
P41212	ETV6	0.09578	0.00256	7.23687	2	ETV6_HUMAN Transcription factor ETV6
P41214	EIF2D	0.06041	0.00731	11.474	1	EIF2D_HUMAN Eukaryotic translation initiation factor 2D
P41223	BUD31	0.1196	0.00358	5.79554	5	BUD31_HUMAN Protein BUD31 homolog
P41227	NAA10	0.17645	0.0228	3.92829	2	NAA10_HUMAN N-alpha-acetyltransferase 10
P41240	CSK	0.04995	0.00664	13.8768	5	CSK_HUMAN Tyrosine-protein kinase CSK
P41250	GARS	0.05853	0.00306	11.8426	2	SYG_HUMAN Glycine--tRNA ligase
P41252	IARS	0.06607	0.01199	10.4911	4	SYIC_HUMAN Isoleucine--tRNA ligase, cytoplasmic
P42025	ACTR1B	0.07522	0.00569	9.21493	1	ACTY_HUMAN Beta-centractin
P42126	ECI1	0.09438	0.01224	7.34422	1	ECI1_HUMAN Enoyl-CoA delta isomerase 1, mitochondrial
P42166	TMPO	0.05637	0.01259	12.2964	13	LAP2A_HUMAN Lamina-associated polypeptide 2, isoform alpha
P42167	TMPO	0.03654	0.00796	18.9695	5	LAP2B_HUMAN Lamina-associated polypeptide 2, isoforms beta/gamma
P42224	STAT1	0.05885	0.00324	11.7782	8	STAT1_HUMAN Signal transducer and activator of transcription 1-alpha/beta
P42285	SKIV2L2	0.09214	0.01061	7.52276	2	SK2L2_HUMAN Superkiller viralicidic activity 2-like 2
P42677	RPS27	0.32095	0.08219	2.15967	1	RS27_HUMAN 40S ribosomal protein S27
P42696	RBM34	0.10055	0.01006	6.89356	1	RBM34_HUMAN RNA-binding protein 34
P42704	LRPPRC	0.07458	0.00685	9.29401	27	LPPRC_HUMAN Leucine-rich PPR motif-containing protein, mitochondrial
P42765	ACAA2	0.05321	0.00414	13.0266	3	THIM_HUMAN 3-ketoacyl-CoA thiolase, mitochondrial
P42766	RPL35	0.41064	0.10749	1.68797	6	RL35_HUMAN 60S ribosomal protein L35
P43243	MATR3	0.05403	0.00616	12.8289	11	MATR3_HUMAN Matrin-3
P43304	GPD2	0.09114	0.00917	7.6053	3	GPDM_HUMAN Glycerol-3-phosphate dehydrogenase, mitochondrial
P43307	SSR1	0.04124	0.0038	16.8076	1	SSRA_HUMAN Translocon-associated protein subunit alpha
P43487	RANBP1	0.04817	0.00161	14.3896	3	RANG_HUMAN Ran-specific GTPase-activating protein
P43490	NAMPT	0.03243	0.00268	21.3736	7	NAMPT_HUMAN Nicotinamide phosphoribosyltransferase
P43686	PSMC4	0.13094	0.01447	5.29362	2	PRS6B_HUMAN 26S protease regulatory subunit 6B
P43897-2	TSFM	0.04436	0.00563	15.6255	6	EFTS_HUMAN Isoform 2 of Elongation factor Ts, mitochondrial
P45877	PPIC	0.06573	0.00815	10.5454	3	PPIC_HUMAN Peptidyl-prolyl cis-trans isomerase C
P45880-1	VDAC2	0.0369	0.00707	18.7845	10	VDAC2_HUMAN Isoform 1 of Voltage-dependent anion-selective channel protein 2
P45954	ACADSB	0.04585	0.00272	15.1177	3	ACDSB_HUMAN Short/branched chain specific acyl-CoA dehydrogenase, mitochondrial
P45973	CBX5	0.07666	0.00836	9.04184	4	CBX5_HUMAN Chromobox protein homolog 5
P45983	MAPK8	0.10874	0.01227	6.37435	1	MK08_HUMAN Mitogen-activated protein kinase 8
P46013	MKI67	0.07715	0.00429	8.98441	51	KI67_HUMAN Antigen KI-67
P46019	PHKA2	0.06437	0.0033	10.7682	1	KPB2_HUMAN Phosphorylase b kinase regulatory subunit alpha, liver isoform
P46060	RANGAP1	0.08741	0.00567	7.92984	8	RAGP1_HUMAN Ran GTPase-activating protein 1
P46063	RECQL	0.07044	0.01058	9.84025	1	RECQ1_HUMAN ATP-dependent DNA helicase Q1
P46087-4	NOP2	0.04638	0.00606	14.945	4	NOP2_HUMAN Isoform 4 of Putative ribosomal RNA methyltransferase NOP2
P46199	MTIF2	0.08307	0.0049	8.34413	3	IF2M_HUMAN Translation initiation factor IF-2, mitochondrial
P46379-3	BAG6	0.08494	0.0057	8.16043	1	BAG6_HUMAN Isoform 3 of Large proline-rich protein BAG6
P46459	NSF	0.05966	0.00534	11.6183	12	NSF_HUMAN Vesicle-fusing ATPase
P46776	RPL27A	0.07474	0.01273	9.27411	4	RL27A_HUMAN 60S ribosomal protein L27a
P46777	RPL5	0.05411	0.0075	12.81	8	RL5_HUMAN 60S ribosomal protein L5
P46778	RPL21	0.04769	0.00908	14.5344	3	RL21_HUMAN 60S ribosomal protein L21
P46779-3	RPL28	0.09134	0.02236	7.58865	3	RL28_HUMAN Isoform 3 of 60S ribosomal protein L28
P46781	RPS9	0.13751	0.0347	5.0407	4	RS9_HUMAN 40S ribosomal protein S9
P46782	RPS5	0.36609	0.10655	1.89338	5	RS5_HUMAN 40S ribosomal protein S5
P46940	IQGAP1	0.04973	0.00189	13.9382	24	IQGA1_HUMAN Ras GTPase-activating-like protein IQGAP1
P46977	STT3A	0.05046	0.00863	13.7366	3	STT3A_HUMAN Dolichyl-diphosphooligosaccharide--protein glycosyltransferase subunit STT3A
P47756	CAPZB	0.04477	0.0056	15.4824	1	CAPZB_HUMAN F-actin-capping protein subunit beta
P47813	EIF1AX	0.06495	0.00638	10.672	5	IF1AX_HUMAN Eukaryotic translation initiation factor 1A, X-chromosomal
P47897	QARS	0.04659	0.01001	14.8776	1	SYQ_HUMAN Glutamine--tRNA ligase
P47914	RPL29	0.18884	0.03784	3.67055	7	RL29_HUMAN 60S ribosomal protein L29
P47989	XDH	0.0507	0.00282	13.6715	1	XDH_HUMAN Xanthine dehydrogenase/oxidase
P48047	ATP5O	0.05707	0.00845	12.1456	5	ATPO_HUMAN ATP synthase subunit O, mitochondrial
P48059-3	LIMS1	0.06364	0.002	10.8917	3	LIMS1_HUMAN Isoform 3 of LIM and senescent cell antigen-like-containing domain protein 1
P48382	RFX5	0.05681	0.00534	12.2011	2	RFX5_HUMAN DNA-binding protein RFX5
P48426	PIP4K2A	0.03334	0.00528	20.7903	1	PI42A_HUMAN Phosphatidylinositol 5-phosphate 4-kinase type-2 alpha
P48443	RXRG	0.1157	0.00537	5.9909	2	RXRG_HUMAN Retinoic acid receptor RXR-gamma
P48444	ARCN1	0.08721	0.00754	7.94802	7	COPD_HUMAN Coatomer subunit delta
P48509	CD151	0.10943	0.00694	6.33416	1	CD151_HUMAN CD151 antigen
P48552	NRIP1	0.25165	0.02498	2.75441	3	NRIP1_HUMAN Nuclear receptor-interacting protein 1
P48556	PSMD8	0.06174	0.00683	11.2269	8	PSMD8_HUMAN 26S proteasome non-ATPase regulatory subunit 8
P48634	PRRC2A	0.05035	0.0045	13.7666	6	PRC2A_HUMAN Protein PRRC2A
P48643	CCT5	0.15124	0.01932	4.58309	13	TCPE_HUMAN T-complex protein 1 subunit epsilon
P48651	PTDSS1	0.03687	0.00732	18.7998	1	PTSS1_HUMAN Phosphatidylserine synthase 1
P48735	IDH2	0.04866	0.00494	14.2447	14	IDHP_HUMAN Isocitrate dehydrogenase [NADP], mitochondrial
P48739-2	PITPNB	0.06885	0.00523	10.0675	5	PIPNB_HUMAN Isoform 2 of Phosphatidylinositol transfer protein beta isoform
P49005	POLD2	0.11627	0.0092	5.96153	2	DPOD2_HUMAN DNA polymerase delta subunit 2
P49023-3	PXN	0.07296	0.00485	9.50037	3	PAXI_HUMAN Isoform Gamma of Paxillin
P49069	CAMLG	0.05698	0.00623	12.1647	2	CAMLG_HUMAN Calcium signal-modulating cyclophilin ligand
P49137	MAPKAPK2	0.0956	0.0141	7.25049	3	MAPK2_HUMAN MAP kinase-activated protein kinase 2
P49321-3	NASP	0.0421	0.00546	16.4643	1	NASP_HUMAN Isoform 3 of Nuclear autoantigenic sperm protein
P49327	FASN	0.09198	0.00803	7.53585	7	FAS_HUMAN Fatty acid synthase
P49336	CDK8	0.05925	0.00611	11.6987	1	CDK8_HUMAN Cyclin-dependent kinase 8
P49366	DHPS	0.06995	0.00496	9.90918	1	DHYS_HUMAN Deoxyhypusine synthase
P49368	CCT3	0.27486	0.05368	2.52182	6	TCPG_HUMAN T-complex protein 1 subunit gamma
P49407	ARRB1	0.0585	0.00359	11.8487	1	ARRB1_HUMAN Beta-arrestin-1
P49411	TUFM	0.03377	0.00659	20.5255	5	EFTU_HUMAN Elongation factor Tu, mitochondrial
P49419	ALDH7A1	0.04394	0.00639	15.7749	1	AL7A1_HUMAN Alpha-aminoadipic semialdehyde dehydrogenase
P49454	CENPF	0.14373	0.00751	4.82256	7	CENPF_HUMAN Centromere protein F
P49458	SRP9	0.08792	0.01099	7.88384	5	SRP09_HUMAN Signal recognition particle 9 kDa protein
P49585	PCYT1A	0.04472	0.01033	15.4997	1	PCY1A_HUMAN Choline-phosphate cytidylyltransferase A
P49588	AARS	0.06827	0.00434	10.153	11	SYAC_HUMAN Alanine--tRNA ligase, cytoplasmic
P49589-3	CARS	0.07237	0.00681	9.57782	5	SYCC_HUMAN Isoform 3 of Cysteine--tRNA ligase, cytoplasmic
P49591	SARS	0.11878	0.01282	5.83555	2	SYSC_HUMAN Serine--tRNA ligase, cytoplasmic
P49643	PRIM2	0.08558	0.01139	8.09941	3	PRI2_HUMAN DNA primase large subunit
P49711	CTCF	0.05245	0.00592	13.2154	2	CTCF_HUMAN Transcriptional repressor CTCF
P49720	PSMB3	0.16689	0.02986	4.15332	2	PSB3_HUMAN Proteasome subunit beta type-3
P49736	MCM2	0.06049	0.00496	11.4589	7	MCM2_HUMAN DNA replication licensing factor MCM2
P49748-3	ACADVL	0.09972	0.00774	6.95093	7	ACADV_HUMAN Isoform 3 of Very long-chain specific acyl-CoA dehydrogenase, mitochondrial
P49750-4	YLPM1	0.05185	0.00673	13.3683	5	YLPM1_HUMAN Isoform 4 of YLP motif-containing protein 1
P49753	ACOT2	0.05963	0.00698	11.6241	1	ACOT2_HUMAN Acyl-coenzyme A thioesterase 2, mitochondrial
P49755	TMED10	0.07925	0.00348	8.74634	6	TMEDA_HUMAN Transmembrane emp24 domain-containing protein 10
P49756	RBM25	0.06592	0.00754	10.515	6	RBM25_HUMAN RNA-binding protein 25
P49757	NUMB	0.07769	0.00507	8.92196	2	NUMB_HUMAN Protein numb homolog
P49773	HINT1	0.04107	0.00343	16.8772	1	HINT1_HUMAN Histidine triad nucleotide-binding protein 1
P49790	NUP153	0.04214	0.00548	16.4487	9	NU153_HUMAN Nuclear pore complex protein Nup153
P49792	RANBP2	0.07826	0.00338	8.85698	8	RBP2_HUMAN E3 SUMO-protein ligase RanBP2
P49821	NDUFV1	0.12394	0.00694	5.5926	4	NDUV1_HUMAN NADH dehydrogenase [ubiquinone] flavoprotein 1, mitochondrial
P49840	GSK3A	0.04845	0.00309	14.3064	3	GSK3A_HUMAN Glycogen synthase kinase-3 alpha
P49848-3	TAF6	0.42908	0.049	1.61543	1	TAF6_HUMAN Isoform 3 of Transcription initiation factor TFIID subunit 6
P49902	NT5C2	0.07985	0.01227	8.68062	3	5NTC_HUMAN Cytosolic purine 5'-nucleotidase
P49903	SEPHS1	0.03645	0.0046	19.0164	2	SPS1_HUMAN Selenide, water dikinase 1
P49915	GMPS	0.03983	0.00438	17.4026	8	GUAA_HUMAN GMP synthase [glutamine-hydrolyzing]
P50148	GNAQ	0.03511	0.01277	19.7422	1	GNAQ_HUMAN Guanine nucleotide-binding protein G(q) subunit alpha
P50213	IDH3A	0.05602	0.00313	12.3732	4	IDH3A_HUMAN Isocitrate dehydrogenase [NAD] subunit alpha, mitochondrial
P50219	MNX1	0.09928	0.00963	6.98174	1	MNX1_HUMAN Motor neuron and pancreas homeobox protein 1
P50395	GDI2	0.0564	0.00495	12.2898	6	GDIB_HUMAN Rab GDP dissociation inhibitor beta
P50402	EMD	0.04884	0.00564	14.1922	1	EMD_HUMAN Emerin
P50416	CPT1A	0.04936	0.00543	14.0427	2	CPT1A_HUMAN Carnitine O-palmitoyltransferase 1, liver isoform
P50454	SERPINH1	0.08184	0.01081	8.46954	9	SERPH_HUMAN Serpin H1
P50461	CSRP3	0.06586	0.01329	10.5246	1	CSRP3_HUMAN Cysteine and glycine-rich protein 3
P50502	ST13	0.06312	0.00311	10.9814	9	F10A1_HUMAN Hsc70-interacting protein
P50552	VASP	0.05748	0.00574	12.0589	3	VASP_HUMAN Vasodilator-stimulated phosphoprotein
P50570-4	DNM2	0.06763	0.00272	10.2491	9	DYN2_HUMAN Isoform 4 of Dynamin-2
P50750-2	CDK9	0.15304	0.01295	4.52919	2	CDK9_HUMAN Isoform 2 of Cyclin-dependent kinase 9
P50897	PPT1	0.23511	0.03221	2.94818	2	PPT1_HUMAN Palmitoyl-protein thioesterase 1
P50990	CCT8	0.07851	0.00522	8.82878	6	TCPQ_HUMAN T-complex protein 1 subunit theta
P50991	CCT4	0.06545	0.00595	10.5905	10	TCPD_HUMAN T-complex protein 1 subunit delta
P50995	ANXA11	0.05459	0.00608	12.6973	3	ANX11_HUMAN Annexin A11
P51114	FXR1	0.06531	0.00457	10.6132	2	FXR1_HUMAN Fragile X mental retardation syndrome-related protein 1
P51116	FXR2	0.07338	0.00327	9.446	1	FXR2_HUMAN Fragile X mental retardation syndrome-related protein 2
P51148-2	RAB5C	0.0586	0.00516	11.8285	4	RAB5C_HUMAN Isoform 2 of Ras-related protein Rab-5C
P51149	RAB7A	0.03444	0.0093	20.1262	8	RAB7A_HUMAN Ras-related protein Rab-7a
P51153	RAB13	0.05462	0.00791	12.6904	4	RAB13_HUMAN Ras-related protein Rab-13
P51159	RAB27A	0.00917	0.00692	75.5886	3	RB27A_HUMAN Ras-related protein Rab-27A
P51160	PDE6C	0.0662	0.00593	10.4705	1	PDE6C_HUMAN Cone cGMP-specific 3',5'-cyclic phosphodiesterase subunit alpha'
P51398	DAP3	0.08551	0.00653	8.10604	4	RT29_HUMAN 28S ribosomal protein S29, mitochondrial
P51452	DUSP3	0.05585	0.00966	12.4109	1	DUS3_HUMAN Dual specificity protein phosphatase 3
P51572-2	BCAP31	0.02871	0.01129	24.1431	11	BAP31_HUMAN Isoform 2 of B-cell receptor-associated protein 31
P51610-4	HCFC1	0.03097	0.01192	22.3812	2	HCFC1_HUMAN Isoform 4 of Host cell factor 1
P51648-2	ALDH3A2	0.0684	0.00389	10.1337	4	AL3A2_HUMAN Isoform 2 of Fatty aldehyde dehydrogenase
P51649-2	ALDH5A1	0.11071	0.00609	6.26093	1	SSDH_HUMAN Isoform 2 of Succinate-semialdehyde dehydrogenase, mitochondrial
P51659-2	HSD17B4	0.04055	0.00983	17.0936	9	DHB4_HUMAN Isoform 2 of Peroxisomal multifunctional enzyme type 2
P51665	PSMD7	0.10005	0.01793	6.92801	1	PSMD7_HUMAN 26S proteasome non-ATPase regulatory subunit 7
P51668	UBE2D1	0.05704	0.00914	12.1519	1	UB2D1_HUMAN Ubiquitin-conjugating enzyme E2 D1
P51784	USP11	0.15051	0.00218	4.60532	1	UBP11_HUMAN Ubiquitin carboxyl-terminal hydrolase 11
P51809-2	VAMP7	0.05467	0.00381	12.6787	2	VAMP7_HUMAN Isoform 2 of Vesicle-associated membrane protein 7
P51825-2	AFF1	0.09305	0.00361	7.44919	2	AFF1_HUMAN Isoform 2 of AF4/FMR2 family member 1
P51858-3	HDGF	0.05886	0.00594	11.7762	7	HDGF_HUMAN Isoform 3 of Hepatoma-derived growth factor
P51965	UBE2E1	0.07523	0.00437	9.21371	2	UB2E1_HUMAN Ubiquitin-conjugating enzyme E2 E1
P51970	NDUFA8	0.11343	0.00727	6.11079	3	NDUA8_HUMAN NADH dehydrogenase [ubiquinone] 1 alpha subcomplex subunit 8
P51991	HNRNPA3	0.05105	0.0034	13.5778	7	ROA3_HUMAN Heterogeneous nuclear ribonucleoprotein A3
P52209	PGD	0.06511	0.00826	10.6458	8	6PGD_HUMAN 6-phosphogluconate dehydrogenase, decarboxylating
P52272	HNRNPM	0.05428	0.00916	12.7698	15	HNRPM_HUMAN Heterogeneous nuclear ribonucleoprotein M
P52272-2	HNRNPM	0.05963	0.00764	11.6241	1	HNRPM_HUMAN Isoform 2 of Heterogeneous nuclear ribonucleoprotein M
P52292	KPNA2	0.13051	0.00732	5.31107	8	IMA1_HUMAN Importin subunit alpha-1
P52294	KPNA1	0.05671	0.0041	12.2227	4	IMA5_HUMAN Importin subunit alpha-5
P52306-5	RAP1GDS1	0.05696	0.00631	12.169	1	GDS1_HUMAN Isoform 5 of Rap1 GTPase-GDP dissociation stimulator 1
P52569-3	SLC7A2	0.10041	0.00606	6.90317	5	CTR2_HUMAN Isoform 3 of Low affinity cationic amino acid transporter 2
P52594-4	AGFG1	0.06606	0.00555	10.4927	4	AGFG1_HUMAN Isoform 4 of Arf-GAP domain and FG repeat-containing protein 1
P52597	HNRNPF	0.0673	0.00555	10.2994	3	HNRPF_HUMAN Heterogeneous nuclear ribonucleoprotein F
P52701	MSH6	0.13657	0.00818	5.0754	2	MSH6_HUMAN DNA mismatch repair protein Msh6
P52735	VAV2	0.06312	0.00542	10.9814	3	VAV2_HUMAN Guanine nucleotide exchange factor VAV2
P52756	RBM5	0.06285	0.00936	11.0286	3	RBM5_HUMAN RNA-binding protein 5
P52788	SMS	0.06573	0.00794	10.5454	2	SPSY_HUMAN Spermine synthase
P52907	CAPZA1	0.05191	0.00326	13.3529	4	CAZA1_HUMAN F-actin-capping protein subunit alpha-1
P52943	CRIP2	0.04906	0.00924	14.1286	1	CRIP2_HUMAN Cysteine-rich protein 2
P52943-2	CRIP2	0.03309	0.00848	20.9473	4	CRIP2_HUMAN Isoform 2 of Cysteine-rich protein 2
P52948	NUP98	0.05874	0.00808	11.8003	2	NUP98_HUMAN Nuclear pore complex protein Nup98-Nup96
P53004	BLVRA	0.04776	0.00288	14.5131	5	BIEA_HUMAN Biliverdin reductase A
P53007	SLC25A1	0.04901	0.00323	14.143	4	TXTP_HUMAN Tricarboxylate transport protein, mitochondrial
P53041	PPP5C	0.10386	0.01331	6.67386	4	PPP5_HUMAN Serine/threonine-protein phosphatase 5
P53350	PLK1	0.13499	0.00619	5.1348	1	PLK1_HUMAN Serine/threonine-protein kinase PLK1
P53355-3	DAPK1	0.23989	0.05264	2.88944	1	DAPK1_HUMAN Isoform 3 of Death-associated protein kinase 1
P53365	ARFIP2	0.05209	0.01021	13.3067	1	ARFP2_HUMAN Arfaptin-2
P53367	ARFIP1	0.04548	0.0042	15.2407	2	ARFP1_HUMAN Arfaptin-1
P53396	ACLY	0.16958	0.03307	4.08743	2	ACLY_HUMAN ATP-citrate synthase
P53582	METAP1	0.03942	0.00361	17.5836	2	MAP11_HUMAN Methionine aminopeptidase 1
P53597	SUCLG1	0.05556	0.00798	12.4757	5	SUCA_HUMAN Succinyl-CoA ligase [ADP/GDP-forming] subunit alpha, mitochondrial
P53618	COPB1	0.07587	0.004	9.13598	4	COPB_HUMAN Coatomer subunit beta
P53621-2	COPA	0.05888	0.00538	11.7722	12	COPA_HUMAN Isoform 2 of Coatomer subunit alpha
P53701	HCCS	0.04569	0.00659	15.1707	1	CCHL_HUMAN Cytochrome c-type heme lyase
P53779	MAPK10	0.08396	0.00967	8.25568	1	MK10_HUMAN Mitogen-activated protein kinase 10
P53801	PTTG1IP	0.12926	0.0042	5.36243	1	PTTG_HUMAN Pituitary tumor-transforming gene 1 protein-interacting protein
P53985	SLC16A1	0.04541	0.0105	15.2642	2	MOT1_HUMAN Monocarboxylate transporter 1
P53990-5	IST1	0.05562	0.00468	12.4622	3	IST1_HUMAN Isoform 5 of IST1 homolog
P53999	SUB1	0.08854	0.0025	7.82863	2	TCP4_HUMAN Activated RNA polymerase II transcriptional coactivator p15
P54136	RARS	0.05604	0.00376	12.3688	2	SYRC_HUMAN Arginine--tRNA ligase, cytoplasmic
P54577	YARS	0.06137	0.00624	11.2946	14	SYYC_HUMAN Tyrosine--tRNA ligase, cytoplasmic
P54578	USP14	0.05989	0.00427	11.5737	3	UBP14_HUMAN Ubiquitin carboxyl-terminal hydrolase 14
P54709	ATP1B3	0.15901	0.01506	4.35914	8	AT1B3_HUMAN Sodium/potassium-transporting ATPase subunit beta-3
P54819	AK2	0.06296	0.00616	11.0093	4	KAD2_HUMAN Adenylate kinase 2, mitochondrial
P54886	ALDH18A1	0.05784	0.00433	11.9839	2	P5CS_HUMAN Delta-1-pyrroline-5-carboxylate synthase
P54920	NAPA	0.06155	0.00721	11.2615	6	SNAA_HUMAN Alpha-soluble NSF attachment protein
P55010	EIF5	0.05295	0.0089	13.0906	15	IF5_HUMAN Eukaryotic translation initiation factor 5
P55011	SLC12A2	0.11535	0.00499	6.00908	4	S12A2_HUMAN Solute carrier family 12 member 2
P55039	DRG2	0.08165	0.00922	8.48925	5	DRG2_HUMAN Developmentally-regulated GTP-binding protein 2
P55060	CSE1L	0.09456	0.00612	7.33024	13	XPO2_HUMAN Exportin-2
P55061	TMBIM6	0.41403	0.04113	1.67415	1	BI1_HUMAN Bax inhibitor 1
P55072	VCP	0.01462	0.02078	47.4109	6	TERA_HUMAN Transitional endoplasmic reticulum ATPase
P55081	MFAP1	0.09155	0.00356	7.57124	4	MFAP1_HUMAN Microfibrillar-associated protein 1
P55084	HADHB	0.06146	0.00655	11.278	6	ECHB_HUMAN Trifunctional enzyme subunit beta, mitochondrial
P55145	MANF	0.04703	0.00498	14.7384	1	MANF_HUMAN Mesencephalic astrocyte-derived neurotrophic factor
P55199	ELL	0.07788	0.0035	8.90019	2	ELL_HUMAN RNA polymerase II elongation factor ELL
P55201-2	BRPF1	0.10501	0.00563	6.60077	2	BRPF1_HUMAN Isoform 2 of Peregrin
P55209	NAP1L1	0.13176	0.01477	5.26068	4	NP1L1_HUMAN Nucleosome assembly protein 1-like 1
P55263	ADK	0.05382	0.00575	12.879	2	ADK_HUMAN Adenosine kinase
P55265-4	ADAR	0.06975	0.00538	9.93759	16	DSRAD_HUMAN Isoform 4 of Double-stranded RNA-specific adenosine deaminase
P55317	FOXA1	0.18101	0.01625	3.82933	2	FOXA1_HUMAN Hepatocyte nuclear factor 3-alpha
P55769	NHP2L1	0.14202	0.00997	4.88063	4	NH2L1_HUMAN NHP2-like protein 1
P55786	NPEPPS	0.05991	0.00639	11.5698	2	PSA_HUMAN Puromycin-sensitive aminopeptidase
P55795	HNRNPH2	0.06168	0.004	11.2378	1	HNRH2_HUMAN Heterogeneous nuclear ribonucleoprotein H2
P55854	SUMO3	0.05757	0.00386	12.0401	3	SUMO3_HUMAN Small ubiquitin-related modifier 3
P55884-2	EIF3B	0.0645	0.00695	10.7465	2	EIF3B_HUMAN Isoform 2 of Eukaryotic translation initiation factor 3 subunit B
P56159	GFRA1	0.15268	0.00754	4.53987	12	GFRA1_HUMAN GDNF family receptor alpha-1
P56181	NDUFV3	0.12437	0.00867	5.57327	1	NDUV3_HUMAN NADH dehydrogenase [ubiquinone] flavoprotein 3, mitochondrial
P56181-2	NDUFV3	0.04925	0.00662	14.0741	1	NDUV3_HUMAN Isoform 2 of NADH dehydrogenase [ubiquinone] flavoprotein 3, mitochondrial
P56182	RRP1	0.15471	0.01424	4.4803	1	RRP1_HUMAN Ribosomal RNA processing protein 1 homolog A
P56192	MARS	0.04716	0.00326	14.6978	1	SYMC_HUMAN Methionine--tRNA ligase, cytoplasmic
P56211	ARPP19	0.08206	0.00572	8.44683	2	ARP19_HUMAN cAMP-regulated phosphoprotein 19
P56270-2	MAZ	0.06558	0.00434	10.5695	2	MAZ_HUMAN Isoform 2 of Myc-associated zinc finger protein
P56378	MP68	0.15438	0.01769	4.48988	1	68MP_HUMAN 6.8 kDa mitochondrial proteolipid
P56545-2	CTBP2	0.08244	0.00262	8.4079	1	CTBP2_HUMAN Isoform 2 of C-terminal-binding protein 2
P56556	NDUFA6	0.14865	0.01577	4.66295	1	NDUA6_HUMAN NADH dehydrogenase [ubiquinone] 1 alpha subcomplex subunit 6
P56589	PEX3	0.10393	0.00552	6.66937	2	PEX3_HUMAN Peroxisomal biogenesis factor 3
P56962	STX17	0.06526	0.00512	10.6213	1	STX17_HUMAN Syntaxin-17
P57076	C21orf59	0.15151	0.01588	4.57493	5	CU059_HUMAN UPF0769 protein C21orf59
P57088	TMEM33	0.06293	0.00511	11.0146	1	TMM33_HUMAN Transmembrane protein 33
P57105	SYNJ2BP	0.03641	0.00586	19.0373	2	SYJ2B_HUMAN Synaptojanin-2-binding protein
P57721	PCBP3	0.06553	0.00386	10.5776	1	PCBP3_HUMAN Poly(rC)-binding protein 3
P57723	PCBP4	0.07088	0.00441	9.77916	1	PCBP4_HUMAN Poly(rC)-binding protein 4
P57737-3	CORO7	0.06464	0.00568	10.7232	5	CORO7_HUMAN Isoform 3 of Coronin-7
P57772	EEFSEC	0.24742	0.03926	2.8015	5	SELB_HUMAN Selenocysteine-specific elongation factor
P58107	EPPK1	0.05618	0.00343	12.338	9	EPIPL_HUMAN Epiplakin
P58546	MTPN	0.04877	0.00258	14.2126	2	MTPN_HUMAN Myotrophin
P59998-2	ARPC4	0.17879	0.03642	3.87688	3	ARPC4_HUMAN Isoform 2 of Actin-related protein 2/3 complex subunit 4
P60033	CD81	0.08439	0.00715	8.21362	1	CD81_HUMAN CD81 antigen
P60059	SEC61G	0.12417	0.0117	5.58224	1	SC61G_HUMAN Protein transport protein Sec61 subunit gamma
P60174	TPI1	0.02589	0.0066	26.7728	13	TPIS_HUMAN Triosephosphate isomerase
P60228	EIF3E	0.14534	0.02425	4.76914	8	EIF3E_HUMAN Eukaryotic translation initiation factor 3 subunit E
P60468	SEC61B	0.10078	0.00484	6.87782	1	SC61B_HUMAN Protein transport protein Sec61 subunit beta
P60520	GABARAPL2	0.08527	0.00757	8.12885	3	GBRL2_HUMAN Gamma-aminobutyric acid receptor-associated protein-like 2
P60660-2	MYL6	0.10621	0.06617	6.5262	1	MYL6_HUMAN Isoform Smooth muscle of Myosin light polypeptide 6
P60709	ACTB	0.04643	0.0156	14.9289	4	ACTB_HUMAN Actin, cytoplasmic 1
P60842	EIF4A1	0.11041	0.01156	6.27794	4	IF4A1_HUMAN Eukaryotic initiation factor 4A-I
P60866-2	RPS20	0.12941	0.02343	5.35621	3	RS20_HUMAN Isoform 2 of 40S ribosomal protein S20
P60891	PRPS1	0.04104	0.00305	16.8896	1	PRPS1_HUMAN Ribose-phosphate pyrophosphokinase 1
P60900	PSMA6	0.31244	0.04415	2.2185	2	PSA6_HUMAN Proteasome subunit alpha type-6
P60903	S100A10	0.23182	0.03516	2.99002	4	S10AA_HUMAN Protein S100-A10
P60953	CDC42	0.04106	0.00615	20.9663	2	CDC42_HUMAN Cell division control protein 42 homolog
P60953-1	CDC42	0.05053	0.00776	13.7175	4	CDC42_HUMAN Isoform 1 of Cell division control protein 42 homolog
P60981	DSTN	0.05124	0.00957	13.5275	5	DEST_HUMAN Destrin
P60983	GMFB	0.05671	0.00828	12.2227	2	GMFB_HUMAN Glia maturation factor beta
P61006	RAB8A	0.04206	0.00791	16.48	10	RAB8A_HUMAN Ras-related protein Rab-8A
P61009	SPCS3	0.04537	0.00581	15.2777	2	SPCS3_HUMAN Signal peptidase complex subunit 3
P61011	SRP54	0.12413	0.01575	5.58404	12	SRP54_HUMAN Signal recognition particle 54 kDa protein
P61026	RAB10	0.05264	0.00995	13.1677	4	RAB10_HUMAN Ras-related protein Rab-10
P61077-3	UBE2D3	0.06096	0.00862	11.3705	1	UB2D3_HUMAN Isoform 3 of Ubiquitin-conjugating enzyme E2 D3
P61081	UBE2M	0.04218	0.00675	16.4331	3	UBC12_HUMAN NEDD8-conjugating enzyme Ubc12
P61086	UBE2K	0.03489	0.00292	19.8666	2	UBE2K_HUMAN Ubiquitin-conjugating enzyme E2 K
P61088	UBE2N	0.05609	0.01155	12.3578	1	UBE2N_HUMAN Ubiquitin-conjugating enzyme E2 N
P61106	RAB14	0.02038	0.01317	34.0111	1	RAB14_HUMAN Ras-related protein Rab-14
P61158	ACTR3	0.05794	0.0063	11.9632	4	ARP3_HUMAN Actin-related protein 3
P61160-2	ACTR2	0.05426	0.00352	12.7746	4	ARP2_HUMAN Isoform 2 of Actin-related protein 2
P61163	ACTR1A	0.14534	0.01594	4.76914	3	ACTZ_HUMAN Alpha-centractin
P61201-2	COPS2	0.08042	0.00877	8.61909	1	CSN2_HUMAN Isoform 2 of COP9 signalosome complex subunit 2
P61204	ARF3	0.02149	0.0109	32.2544	3	ARF3_HUMAN ADP-ribosylation factor 3
P61221	ABCE1	0.03926	0.0051	17.6553	2	ABCE1_HUMAN ATP-binding cassette sub-family E member 1
P61225	RAP2B	0.04864	0.00685	14.2506	2	RAP2B_HUMAN Ras-related protein Rap-2b
P61247	RPS3A	0.21816	0.05803	3.17724	8	RS3A_HUMAN 40S ribosomal protein S3a
P61254	RPL26	0.28138	0.05766	2.46338	5	RL26_HUMAN 60S ribosomal protein L26
P61289-2	PSME3	0.04762	0.00495	14.5558	5	PSME3_HUMAN Isoform 2 of Proteasome activator complex subunit 3
P61313	RPL15	0.56503	0.20522	1.22674	2	RL15_HUMAN 60S ribosomal protein L15
P61353	RPL27	0.228	0.06179	3.04012	4	RL27_HUMAN 60S ribosomal protein L27
P61421	ATP6V0D1	0.15476	0.02042	4.47885	3	VA0D1_HUMAN V-type proton ATPase subunit d 1
P61586	RHOA	0.05802	0.00647	11.9467	2	RHOA_HUMAN Transforming protein RhoA
P61587	RND3	0.24734	0.03262	2.80241	4	RND3_HUMAN Rho-related GTP-binding protein RhoE
P61604	HSPE1	0.04584	0.00938	15.121	5	CH10_HUMAN 10 kDa heat shock protein, mitochondrial
P61619	SEC61A1	0.06703	0.00347	10.3409	4	S61A1_HUMAN Protein transport protein Sec61 subunit alpha isoform 1
P61758	VBP1	0.08004	0.00948	8.66001	2	PFD3_HUMAN Prefoldin subunit 3
P61923	COPZ1	0.08573	0.00841	8.08523	2	COPZ1_HUMAN Coatomer subunit zeta-1
P61927	RPL37	0.20538	0.04319	3.37495	4	RL37_HUMAN 60S ribosomal protein L37
P61956	SUMO2	0.08011	0.00512	8.65244	1	SUMO2_HUMAN Small ubiquitin-related modifier 2
P61960	UFM1	0.06446	0.00856	10.7531	1	UFM1_HUMAN Ubiquitin-fold modifier 1
P61962	DCAF7	0.14705	0.01223	4.71368	2	DCAF7_HUMAN DDB1- and CUL4-associated factor 7
P61978-2	HNRNPK	0.04117	0.00741	16.8362	7	HNRPK_HUMAN Isoform 2 of Heterogeneous nuclear ribonucleoprotein K
P61978-3	HNRNPK	0.0833	0.00751	8.32109	1	HNRPK_HUMAN Isoform 3 of Heterogeneous nuclear ribonucleoprotein K
P61981	YWHAG	0.05485	0.00704	12.6371	4	1433G_HUMAN 14-3-3 protein gamma
P62072	TIMM10	0.12655	0.01259	5.47726	3	TIM10_HUMAN Mitochondrial import inner membrane translocase subunit Tim10
P62081	RPS7	0.15159	0.03182	4.57251	6	RS7_HUMAN 40S ribosomal protein S7
P62136-2	PPP1CA	0.06692	0.00623	10.3578	4	PP1A_HUMAN Isoform 2 of Serine/threonine-protein phosphatase PP1-alpha catalytic subunit
P62191	PSMC1	0.16094	0.02379	4.30687	6	PRS4_HUMAN 26S protease regulatory subunit 4
P62195	PSMC5	0.23438	0.03912	2.95736	4	PRS8_HUMAN 26S protease regulatory subunit 8
P62241	RPS8	0.11941	0.02167	5.80477	2	RS8_HUMAN 40S ribosomal protein S8
P62244	RPS15A	0.13542	0.0278	5.1185	4	RS15A_HUMAN 40S ribosomal protein S15a
P62249	RPS16	0.04328	0.00872	16.0154	3	RS16_HUMAN 40S ribosomal protein S16
P62256	UBE2H	0.07718	0.00538	8.98092	3	UBE2H_HUMAN Ubiquitin-conjugating enzyme E2 H
P62258	YWHAE	0.08734	0.00476	7.93619	4	1433E_HUMAN 14-3-3 protein epsilon
P62263	RPS14	0.16402	0.034	4.22599	1	RS14_HUMAN 40S ribosomal protein S14
P62266	RPS23	0.10098	0.02172	6.8642	2	RS23_HUMAN 40S ribosomal protein S23
P62269	RPS18	0.08897	0.01728	7.7908	3	RS18_HUMAN 40S ribosomal protein S18
P62273-2	RPS29	0.05416	0.00425	12.7981	1	RS29_HUMAN Isoform 2 of 40S ribosomal protein S29
P62277	RPS13	0.07003	0.00786	9.89786	3	RS13_HUMAN 40S ribosomal protein S13
P62280	RPS11	0.13954	0.026	4.96737	5	RS11_HUMAN 40S ribosomal protein S11
P62314	SNRPD1	0.04622	0.01324	14.9967	1	SMD1_HUMAN Small nuclear ribonucleoprotein Sm D1
P62316	SNRPD2	0.08757	0.00892	7.91535	5	SMD2_HUMAN Small nuclear ribonucleoprotein Sm D2
P62318	SNRPD3	0.14128	0.00518	4.90619	2	SMD3_HUMAN Small nuclear ribonucleoprotein Sm D3
P62330	ARF6	0.07361	0.01085	9.41648	2	ARF6_HUMAN ADP-ribosylation factor 6
P62333	PSMC6	0.14987	0.01607	4.62499	6	PRS10_HUMAN 26S protease regulatory subunit 10B
P62341	SELT	0.04965	0.00378	13.9607	1	SELT_HUMAN Selenoprotein T
P62424	RPL7A	0.24745	0.0756	2.80116	5	RL7A_HUMAN 60S ribosomal protein L7a
P62487	POLR2G	0.10747	0.00847	6.44968	1	RPB7_HUMAN DNA-directed RNA polymerase II subunit RPB7
P62495	ETF1	0.05228	0.00525	13.2584	7	ERF1_HUMAN Eukaryotic peptide chain release factor subunit 1
P62701	RPS4X	0.13626	0.02641	5.08695	8	RS4X_HUMAN 40S ribosomal protein S4, X isoform
P62714	PPP2CB	0.07971	0.00873	8.69586	1	PP2AB_HUMAN Serine/threonine-protein phosphatase 2A catalytic subunit beta isoform
P62736	ACTA2	0.05257	0.00404	13.1852	6	ACTA_HUMAN Actin, aortic smooth muscle
P62745	RHOB	0.13055	0.00338	5.30944	3	RHOB_HUMAN Rho-related GTP-binding protein RhoB
P62750	RPL23A	0.14119	0.02059	4.90932	7	RL23A_HUMAN 60S ribosomal protein L23a
P62753	RPS6	0.10977	0.01754	6.31454	5	RS6_HUMAN 40S ribosomal protein S6
P62805	HIST1H4A	0.03505	0.00615	19.776	1	H4_HUMAN Histone H4
P62820	RAB1A	0.04516	0.00451	15.3487	7	RAB1A_HUMAN Ras-related protein Rab-1A
P62826	RAN	0.05692	0.00392	12.1776	3	RAN_HUMAN GTP-binding nuclear protein Ran
P62829	RPL23	0.08697	0.02307	7.96996	2	RL23_HUMAN 60S ribosomal protein L23
P62834	RAP1A	0.03589	0.00833	19.3131	4	RAP1A_HUMAN Ras-related protein Rap-1A
P62841	RPS15	0.10936	0.02288	6.33821	2	RS15_HUMAN 40S ribosomal protein S15
P62847-4	RPS24	0.10444	0.01886	6.6368	3	RS24_HUMAN Isoform 4 of 40S ribosomal protein S24
P62851	RPS25	0.27614	0.05661	2.51013	4	RS25_HUMAN 40S ribosomal protein S25
P62888	RPL30	0.31238	0.05816	2.21892	6	RL30_HUMAN 60S ribosomal protein L30
P62891	RPL39	0.11111	0.0223	6.23839	1	RL39_HUMAN 60S ribosomal protein L39
P62906	RPL10A	0.13425	0.02718	5.16311	4	RL10A_HUMAN 60S ribosomal protein L10a
P62910	RPL32	0.2513	0.05679	2.75825	4	RL32_HUMAN 60S ribosomal protein L32
P62913	RPL11	0.12838	0.02578	5.39918	3	RL11_HUMAN 60S ribosomal protein L11
P62917	RPL8	0.2824	0.07797	2.45449	2	RL8_HUMAN 60S ribosomal protein L8
P62937	PPIA	0.07578	0.01314	9.14684	9	PPIA_HUMAN Peptidyl-prolyl cis-trans isomerase A
P62979	RPS27A	0.13371	0.03313	5.18396	1	RS27A_HUMAN Ubiquitin-40S ribosomal protein S27a
P62993	GRB2	0.07688	0.00987	9.01596	7	GRB2_HUMAN Growth factor receptor-bound protein 2
P63000-2	RAC1	0.06481	0.00892	10.6951	8	RAC1_HUMAN Isoform B of Ras-related C3 botulinum toxin substrate 1
P63010-2	AP2B1	0.06562	0.00325	10.563	12	AP2B1_HUMAN Isoform 2 of AP-2 complex subunit beta
P63092-4	GNAS	0.1236	0.01219	5.60799	2	GNAS2_HUMAN Isoform 4 of Guanine nucleotide-binding protein G(s) subunit alpha isoforms short
P63104	YWHAZ	0.04344	0.00899	15.9564	4	1433Z_HUMAN 14-3-3 protein zeta/delta
P63165	SUMO1	0.12422	0.00644	5.58	2	SUMO1_HUMAN Small ubiquitin-related modifier 1
P63218	GNG5	0.0656	0.00714	10.5663	2	GBG5_HUMAN Guanine nucleotide-binding protein G(I)/G(S)/G(O) subunit gamma-5
P63220	RPS21	0.26784	0.07233	2.58792	3	RS21_HUMAN 40S ribosomal protein S21
P63241-2	EIF5A	0.05553	0.0028	12.4824	3	IF5A1_HUMAN Isoform 2 of Eukaryotic translation initiation factor 5A-1
P63244	GNB2L1	0.09361	0.00951	7.40463	8	GBLP_HUMAN Guanine nucleotide-binding protein subunit beta-2-like 1
P63279	UBE2I	0.05509	0.00813	12.5821	7	UBC9_HUMAN SUMO-conjugating enzyme UBC9
P63313	TMSB10	0.10773	0.01926	6.43411	1	TYB10_HUMAN Thymosin beta-10
P67775	PPP2CA	0.08918	0.00766	7.77245	3	PP2AA_HUMAN Serine/threonine-protein phosphatase 2A catalytic subunit alpha isoform
P67809	YBX1	0.07196	0.00788	9.6324	1	YBOX1_HUMAN Nuclease-sensitive element-binding protein 1
P67812	SEC11A	0.12433	0.01565	5.57506	3	SC11A_HUMAN Signal peptidase complex catalytic subunit SEC11A
P67870	CSNK2B	0.13183	0.01422	5.25789	2	CSK2B_HUMAN Casein kinase II subunit beta
P68036-3	UBE2L3	0.05806	0.01303	11.9385	3	UB2L3_HUMAN Isoform 3 of Ubiquitin-conjugating enzyme E2 L3
P68363	TUBA1B	0.04592	0.00346	15.0947	6	TBA1B_HUMAN Tubulin alpha-1B chain
P68371	TUBB4B	0.06977	0.00526	9.93475	1	TBB4B_HUMAN Tubulin beta-4B chain
P68402	PAFAH1B2	0.05948	0.00755	11.6534	1	PA1B2_HUMAN Platelet-activating factor acetylhydrolase IB subunit beta
P68431	HIST1H3A	0.54074	0.14465	1.28185	4	H31_HUMAN Histone H3.1
P78316	NOP14	0.11753	0.01039	5.89762	12	NOP14_HUMAN Nucleolar protein 14
P78318	IGBP1	0.06009	0.00287	11.5352	1	IGBP1_HUMAN Immunoglobulin-binding protein 1
P78332	RBM6	0.0605	0.0039	11.457	4	RBM6_HUMAN RNA-binding protein 6
P78344	EIF4G2	0.09915	0.011	6.99089	17	IF4G2_HUMAN Eukaryotic translation initiation factor 4 gamma 2
P78346-2	RPP30	0.07681	0.00486	9.02418	1	RPP30_HUMAN Isoform 2 of Ribonuclease P protein subunit p30
P78347	GTF2I	0.06671	0.00563	10.3905	18	GTF2I_HUMAN General transcription factor II-I
P78356	PIP4K2B	0.03655	0.00402	18.9644	3	PI42B_HUMAN Phosphatidylinositol 5-phosphate 4-kinase type-2 beta
P78371	CCT2	0.09678	0.00427	7.16209	14	TCPB_HUMAN T-complex protein 1 subunit beta
P78406	RAE1	0.08524	0.00451	8.13171	6	RAE1L_HUMAN mRNA export factor
P78413	IRX4	0.12536	0.0136	5.52925	1	IRX4_HUMAN Iroquois-class homeodomain protein IRX-4
P78417	GSTO1	0.05414	0.00658	12.8029	5	GSTO1_HUMAN Glutathione S-transferase omega-1
P78527	PRKDC	0.02769	0.00718	25.0324	1	PRKDC_HUMAN DNA-dependent protein kinase catalytic subunit
P78549	NTHL1	0.13831	0.01217	5.01155	2	NTHL1_HUMAN Endonuclease III-like protein 1
P80404	ABAT	0.08765	0.00823	7.90813	5	GABT_HUMAN 4-aminobutyrate aminotransferase, mitochondrial
P81274	GPSM2	0.12799	0.00955	5.41564	2	GPSM2_HUMAN G-protein-signaling modulator 2
P82650	MRPS22	0.08058	0.00441	8.60198	2	RT22_HUMAN 28S ribosomal protein S22, mitochondrial
P82663	MRPS25	0.18445	0.03101	3.75791	2	RT25_HUMAN 28S ribosomal protein S25, mitochondrial
P82673	MRPS35	0.26909	0.02461	2.57589	3	RT35_HUMAN 28S ribosomal protein S35, mitochondrial
P82675	MRPS5	0.07256	0.00721	9.55275	2	RT05_HUMAN 28S ribosomal protein S5, mitochondrial
P82912	MRPS11	0.11557	0.00747	5.99764	2	RT11_HUMAN 28S ribosomal protein S11, mitochondrial
P82914	MRPS15	0.17902	0.02813	3.8719	2	RT15_HUMAN 28S ribosomal protein S15, mitochondrial
P82930	MRPS34	0.17523	0.01602	3.95564	1	RT34_HUMAN 28S ribosomal protein S34, mitochondrial
P82932	MRPS6	0.10229	0.00705	6.77629	2	RT06_HUMAN 28S ribosomal protein S6, mitochondrial
P82933	MRPS9	0.08902	0.00806	7.78642	3	RT09_HUMAN 28S ribosomal protein S9, mitochondrial
P82979	SARNP	0.05324	0.00602	13.0193	2	SARNP_HUMAN SAP domain-containing ribonucleoprotein
P83111	LACTB	0.11181	0.01047	6.19933	5	LACTB_HUMAN Serine beta-lactamase-like protein LACTB, mitochondrial
P83436	COG7	0.14846	0.0155	4.66892	2	COG7_HUMAN Conserved oligomeric Golgi complex subunit 7
P83731	RPL24	0.12282	0.02097	5.6436	8	RL24_HUMAN 60S ribosomal protein L24
P83881	RPL36A	0.16738	0.0421	4.14116	4	RL36A_HUMAN 60S ribosomal protein L36a
P84090	ERH	0.06282	0.00247	11.0339	3	ERH_HUMAN Enhancer of rudimentary homolog
P84098	RPL19	0.19737	0.04666	3.51192	3	RL19_HUMAN 60S ribosomal protein L19
P84101	SERF2	0.17055	0.02475	4.06419	1	SERF2_HUMAN Small EDRK-rich factor 2
P84103	SRSF3	0.05627	0.00199	12.3182	1	SRSF3_HUMAN Serine/arginine-rich splicing factor 3
P84243	H3F3A	0.72539	0.16635	0.955551	1	H33_HUMAN Histone H3.3
P86791	CCZ1	0.21434	0.02443	3.23387	2	CCZ1_HUMAN Vacuolar fusion protein CCZ1 homolog
P98175	RBM10	0.06017	0.00364	11.5198	5	RBM10_HUMAN RNA-binding protein 10
P99999	CYCS	0.08015	0.00696	8.64812	4	CYC_HUMAN Cytochrome c
Q00059	TFAM	0.05781	0.00742	11.9901	10	TFAM_HUMAN Transcription factor A, mitochondrial
Q00169	PITPNA	0.06878	0.00642	10.0777	4	PIPNA_HUMAN Phosphatidylinositol transfer protein alpha isoform
Q00266	MAT1A	0.10148	0.00989	6.83038	2	METK1_HUMAN S-adenosylmethionine synthase isoform type-1
Q00325	SLC25A3	0.0568	0.00442	12.2033	9	MPCP_HUMAN Phosphate carrier protein, mitochondrial
Q00341	HDLBP	0.05586	0.00383	12.4086	20	VIGLN_HUMAN Vigilin
Q00403	GTF2B	0.11184	0.00764	6.19767	2	TF2B_HUMAN Transcription initiation factor IIB
Q00526	CDK3	0.09228	0.01406	7.51135	1	CDK3_HUMAN Cyclin-dependent kinase 3
Q00535	CDK5	0.05587	0.01084	12.4064	1	CDK5_HUMAN Cyclin-dependent kinase 5
Q00536-2	CDK16	0.07624	0.00896	9.09165	1	CDK16_HUMAN Isoform 2 of Cyclin-dependent kinase 16
Q00537	CDK17	0.09245	0.00763	7.49754	2	CDK17_HUMAN Cyclin-dependent kinase 17
Q00610	CLTC	0.1314	0.01631	5.27509	8	CLH1_HUMAN Clathrin heavy chain 1
Q00613	HSF1	0.06136	0.00327	11.2964	1	HSF1_HUMAN Heat shock factor protein 1
Q00653	NFKB2	0.1194	0.00342	5.80525	2	NFKB2_HUMAN Nuclear factor NF-kappa-B p100 subunit
Q00688	FKBP3	0.07018	0.0045	9.87671	6	FKBP3_HUMAN Peptidyl-prolyl cis-trans isomerase FKBP3
Q00765	REEP5	0.02433	0.01207	28.4894	4	REEP5_HUMAN Receptor expression-enhancing protein 5
Q00839	HNRNPU	0.0565	0.00962	12.2681	20	HNRPU_HUMAN Heterogeneous nuclear ribonucleoprotein U
Q00839-2	HNRNPU	0.03697	0.00502	18.7489	1	HNRPU_HUMAN Isoform Short of Heterogeneous nuclear ribonucleoprotein U
Q00978	IRF9	0.18938	0.01618	3.66009	1	IRF9_HUMAN Interferon regulatory factor 9
Q01081	U2AF1	0.09056	0.00849	7.65401	2	U2AF1_HUMAN Splicing factor U2AF 35 kDa subunit
Q01082	SPTBN1	0.03153	0.01367	21.9837	7	SPTB2_HUMAN Spectrin beta chain, non-erythrocytic 1
Q01082-3	SPTBN1	0.05144	0.01423	13.4749	1	SPTB2_HUMAN Isoform 2 of Spectrin beta chain, non-erythrocytic 1
Q01085-2	TIAL1	0.08183	0.01101	8.47058	5	TIAR_HUMAN Isoform 2 of Nucleolysin TIAR
Q01130	SRSF2	0.03377	0.00405	20.5255	2	SRSF2_HUMAN Serine/arginine-rich splicing factor 2
Q01167	FOXK2	0.10873	0.01712	6.37494	1	FOXK2_HUMAN Forkhead box protein K2
Q01518	CAP1	0.06736	0.00477	10.2902	14	CAP1_HUMAN Adenylyl cyclase-associated protein 1
Q01628	IFITM3	0.08592	0.01208	8.06736	1	IFM3_HUMAN Interferon-induced transmembrane protein 3
Q01650	SLC7A5	0.10374	0.00721	6.68158	1	LAT1_HUMAN Large neutral amino acids transporter small subunit 1
Q01780	EXOSC10	0.07471	0.00556	9.27784	8	EXOSX_HUMAN Exosome component 10
Q01813	PFKP	0.04818	0.00367	14.3866	4	K6PP_HUMAN 6-phosphofructokinase type C
Q01831	XPC	0.09075	0.0062	7.63799	1	XPC_HUMAN DNA repair protein complementing XP-C cells
Q01844-5	EWSR1	0.08298	0.01163	8.35318	6	EWS_HUMAN Isoform 5 of RNA-binding protein EWS
Q02156	PRKCE	0.03743	0.00422	18.5185	1	KPCE_HUMAN Protein kinase C epsilon type
Q02218	OGDH	0.07078	0.00668	9.79298	6	ODO1_HUMAN 2-oxoglutarate dehydrogenase, mitochondrial
Q02241	KIF23	0.10424	0.00539	6.64953	14	KIF23_HUMAN Kinesin-like protein KIF23
Q02252	ALDH6A1	0.10911	0.00608	6.35274	9	MMSA_HUMAN Methylmalonate-semialdehyde dehydrogenase [acylating], mitochondrial
Q02338	BDH1	0.10751	0.0103	6.44728	2	BDH_HUMAN D-beta-hydroxybutyrate dehydrogenase, mitochondrial
Q02447	SP3	0.09628	0.00388	7.19929	2	SP3_HUMAN Transcription factor Sp3
Q02543	RPL18A	0.07409	0.0199	9.35548	6	RL18A_HUMAN 60S ribosomal protein L18a
Q02750	MAP2K1	0.05929	0.00545	11.6908	3	MP2K1_HUMAN Dual specificity mitogen-activated protein kinase kinase 1
Q02790	FKBP4	0.06114	0.00346	11.337	17	FKBP4_HUMAN Peptidyl-prolyl cis-trans isomerase FKBP4
Q02809	PLOD1	0.11419	0.0042	6.07012	2	PLOD1_HUMAN Procollagen-lysine,2-oxoglutarate 5-dioxygenase 1
Q02878	RPL6	0.1882	0.04218	3.68303	7	RL6_HUMAN 60S ribosomal protein L6
Q02978	SLC25A11	0.03644	0.00556	19.0216	1	M2OM_HUMAN Mitochondrial 2-oxoglutarate/malate carrier protein
Q03001	DST	0.06044	0.00402	11.4684	3	DYST_HUMAN Dystonin
Q03060-6	CREM	0.06961	0.00665	9.95758	1	CREM_HUMAN Isoform 3 of cAMP-responsive element modulator
Q03113	GNA12	0.07793	0.00502	8.89448	1	GNA12_HUMAN Guanine nucleotide-binding protein subunit alpha-12
Q03164-3	KMT2A	0.07117	0.00415	9.73932	4	KMT2A_HUMAN Isoform 3 of Histone-lysine N-methyltransferase 2A
Q03167	TGFBR3	0.07636	0.00708	9.07736	1	TGBR3_HUMAN Transforming growth factor beta receptor type 3
Q03252	LMNB2	0.08831	0.00751	7.84902	4	LMNB2_HUMAN Lamin-B2
Q03701	CEBPZ	0.0766	0.00475	9.04892	5	CEBPZ_HUMAN CCAAT/enhancer-binding protein zeta
Q04637-9	EIF4G1	0.06678	0.00241	10.3796	23	IF4G1_HUMAN Isoform 9 of Eukaryotic translation initiation factor 4 gamma 1
Q04726	TLE3	0.09088	0.00279	7.62706	1	TLE3_HUMAN Transducin-like enhancer protein 3
Q04727-3	TLE4	0.09686	0.00392	7.15618	2	TLE4_HUMAN Isoform 3 of Transducin-like enhancer protein 4
Q04837	SSBP1	0.03407	0.01004	20.3448	3	SSBP_HUMAN Single-stranded DNA-binding protein, mitochondrial
Q04917	YWHAH	0.05166	0.0062	13.4175	1	1433F_HUMAN 14-3-3 protein eta
Q05048	CSTF1	0.08512	0.00754	8.14318	2	CSTF1_HUMAN Cleavage stimulation factor subunit 1
Q05084	ICA1	0.1202	0.02375	5.76662	1	ICA69_HUMAN Islet cell autoantigen 1
Q05084-2	ICA1	0.09534	0.01076	7.27027	1	ICA69_HUMAN Isoform 2 of Islet cell autoantigen 1
Q05086	UBE3A	0.04306	0.00236	16.0972	1	UBE3A_HUMAN Ubiquitin-protein ligase E3A
Q05193	DNM1	0.05741	0.00259	12.0736	1	DYN1_HUMAN Dynamin-1
Q05209	PTPN12	0.03383	0.00898	20.4891	1	PTN12_HUMAN Tyrosine-protein phosphatase non-receptor type 12
Q05397-5	PTK2	0.05952	0.00679	11.6456	2	FAK1_HUMAN Isoform 5 of Focal adhesion kinase 1
Q05481	ZNF91	0.14064	0.00729	4.92852	1	ZNF91_HUMAN Zinc finger protein 91
Q05639	EEF1A2	0.12211	0.01396	5.67642	15	EF1A2_HUMAN Elongation factor 1-alpha 2
Q05655-2	PRKCD	0.06597	0.00942	10.507	12	KPCD_HUMAN Isoform 2 of Protein kinase C delta type
Q06124	PTPN11	0.06704	0.00475	10.3393	2	PTN11_HUMAN Tyrosine-protein phosphatase non-receptor type 11
Q06323-2	PSME1	0.04205	0.00316	16.4839	6	PSME1_HUMAN Isoform 2 of Proteasome activator complex subunit 1
Q06587	RING1	0.04223	0.00284	16.4136	2	RING1_HUMAN E3 ubiquitin-protein ligase RING1
Q06787	FMR1	0.07148	0.00424	9.69708	1	FMR1_HUMAN Fragile X mental retardation protein 1
Q06830	PRDX1	0.04524	0.01274	15.3216	7	PRDX1_HUMAN Peroxiredoxin-1
Q07020	RPL18	0.13216	0.02881	5.24476	1	RL18_HUMAN 60S ribosomal protein L18
Q07157	TJP1	0.06829	0.00371	10.1501	1	ZO1_HUMAN Tight junction protein ZO-1
Q07617	SPAG1	0.05607	0.00434	12.3622	2	SPAG1_HUMAN Sperm-associated antigen 1
Q07666	KHDRBS1	0.01887	0.01236	36.7328	10	KHDR1_HUMAN KH domain-containing, RNA-binding, signal transduction-associated protein 1
Q07820	MCL1	0.43666	0.07406	1.58738	1	MCL1_HUMAN Induced myeloid leukemia cell differentiation protein Mcl-1
Q07866-9	KLC1	0.08788	0.00481	7.88743	9	KLC1_HUMAN Isoform I of Kinesin light chain 1
Q07889	SOS1	0.04416	0.00796	15.6963	1	SOS1_HUMAN Son of sevenless homolog 1
Q07955-2	SRSF1	0.05917	0.00604	11.7145	3	SRSF1_HUMAN Isoform ASF-2 of Serine/arginine-rich splicing factor 1
Q07960	ARHGAP1	0.06225	0.00728	11.1349	4	RHG01_HUMAN Rho GTPase-activating protein 1
Q08050-3	FOXM1	0.08393	0.00705	8.25863	3	FOXM1_HUMAN Isoform 4 of Forkhead box protein M1
Q08209	PPP3CA	0.06014	0.00433	11.5256	2	PP2BA_HUMAN Serine/threonine-protein phosphatase 2B catalytic subunit alpha isoform
Q08209-2	PPP3CA	0.06417	0.00888	10.8017	1	PP2BA_HUMAN Isoform 2 of Serine/threonine-protein phosphatase 2B catalytic subunit alpha isoform
Q08211	DHX9	0.04577	0.0051	15.1441	14	DHX9_HUMAN ATP-dependent RNA helicase A
Q08379	GOLGA2	0.09668	0.00833	7.1695	2	GOGA2_HUMAN Golgin subfamily A member 2
Q08380	LGALS3BP	0.38908	0.09323	1.7815	1	LG3BP_HUMAN Galectin-3-binding protein
Q08623-4	HDHD1	0.02892	0.00609	23.9677	1	HDHD1_HUMAN Isoform 4 of Pseudouridine-5'-monophosphatase
Q08722	CD47	0.04589	0.00822	15.1045	2	CD47_HUMAN Leukocyte surface antigen CD47
Q08752	PPID	0.05597	0.00828	12.3843	6	PPID_HUMAN Peptidyl-prolyl cis-trans isomerase D
Q08945	SSRP1	0.09666	0.00609	7.17098	2	SSRP1_HUMAN FACT complex subunit SSRP1
Q08AD1	CAMSAP2	0.03899	0.00525	17.7776	9	CAMP2_HUMAN Calmodulin-regulated spectrin-associated protein 2
Q08AF3	SLFN5	0.04575	0.00425	15.1508	2	SLFN5_HUMAN Schlafen family member 5
Q08J23	NSUN2	0.05368	0.00405	12.9126	10	NSUN2_HUMAN tRNA (cytosine(34)-C(5))-methyltransferase
Q09161	NCBP1	0.06092	0.006	11.378	4	NCBP1_HUMAN Nuclear cap-binding protein subunit 1
Q09666	AHNAK	0.05114	0.00981	13.5539	22	AHNK_HUMAN Neuroblast differentiation-associated protein AHNAK
Q10471	GALNT2	0.04941	0.00392	14.0285	1	GALT2_HUMAN Polypeptide N-acetylgalactosaminyltransferase 2
Q10472	GALNT1	0.05054	0.00568	13.7148	1	GALT1_HUMAN Polypeptide N-acetylgalactosaminyltransferase 1
Q10567	AP1B1	0.10402	0.00739	6.6636	3	AP1B1_HUMAN AP-1 complex subunit beta-1
Q11201	ST3GAL1	0.06448	0.00622	10.7498	2	SIA4A_HUMAN CMP-N-acetylneuraminate-beta-galactosamide-alpha-2,3-sialyltransferase 1
Q12778	FOXO1	0.16025	0.02031	4.32541	1	FOXO1_HUMAN Forkhead box protein O1
Q12792	TWF1	0.06513	0.00686	10.6425	1	TWF1_HUMAN Twinfilin-1
Q12792-3	TWF1	0.04068	0.00696	17.039	1	TWF1_HUMAN Isoform 3 of Twinfilin-1
Q12797	ASPH	0.02293	0.00737	30.2288	3	ASPH_HUMAN Aspartyl/asparaginyl beta-hydroxylase
Q12824	SMARCB1	0.09157	0.00852	7.56959	1	SNF5_HUMAN SWI/SNF-related matrix-associated actin-dependent regulator of chromatin subfamily B member 1
Q12830	BPTF	0.06562	0.0071	10.563	7	BPTF_HUMAN Nucleosome-remodeling factor subunit BPTF
Q12834	CDC20	0.25594	0.0207	2.70824	2	CDC20_HUMAN Cell division cycle protein 20 homolog
Q12840	KIF5A	0.04031	0.01016	17.1954	1	KIF5A_HUMAN Kinesin heavy chain isoform 5A
Q12846	STX4	0.07037	0.00785	9.85004	1	STX4_HUMAN Syntaxin-4
Q12849	GRSF1	0.09367	0.00545	7.39988	1	GRSF1_HUMAN G-rich sequence factor 1
Q12872-2	SFSWAP	0.06128	0.0056	11.3111	4	SFSWA_HUMAN Isoform 2 of Splicing factor, suppressor of white-apricot homolog
Q12873-3	CHD3	0.10218	0.00744	6.78359	2	CHD3_HUMAN Isoform 3 of Chromodomain-helicase-DNA-binding protein 3
Q12874	SF3A3	0.05268	0.00385	13.1577	7	SF3A3_HUMAN Splicing factor 3A subunit 3
Q12894	IFRD2	0.10716	0.00871	6.46834	1	IFRD2_HUMAN Interferon-related developmental regulator 2
Q12904-2	AIMP1	0.05524	0.00938	12.5479	1	AIMP1_HUMAN Isoform 2 of Aminoacyl tRNA synthase complex-interacting multifunctional protein 1
Q12905	ILF2	0.08149	0.00579	8.50592	2	ILF2_HUMAN Interleukin enhancer-binding factor 2
Q12906-7	ILF3	0.06189	0.00754	11.1997	15	ILF3_HUMAN Isoform 7 of Interleukin enhancer-binding factor 3
Q12907	LMAN2	0.04911	0.00963	14.1142	4	LMAN2_HUMAN Vesicular integral-membrane protein VIP36
Q12929	EPS8	0.05902	0.00537	11.7443	1	EPS8_HUMAN Epidermal growth factor receptor kinase substrate 8
Q12931	TRAP1	0.05171	0.00862	13.4045	7	TRAP1_HUMAN Heat shock protein 75 kDa, mitochondrial
Q12955	ANK3	0.03998	0.01398	17.3373	1	ANK3_HUMAN Ankyrin-3
Q12972	PPP1R8	0.05344	0.00565	12.9706	1	PP1R8_HUMAN Nuclear inhibitor of protein phosphatase 1
Q12981-1	BNIP1	0.06892	0.00376	10.0573	2	SEC20_HUMAN Isoform 3 of Vesicle transport protein SEC20
Q12982-2	BNIP2	0.04882	0.00594	14.198	1	BNIP2_HUMAN Isoform 2 of BCL2/adenovirus E1B 19 kDa protein-interacting protein 2
Q12996	CSTF3	0.05064	0.00301	13.6877	5	CSTF3_HUMAN Cleavage stimulation factor subunit 3
Q13011	ECH1	0.12235	0.01206	5.66528	5	ECH1_HUMAN Delta(3,5)-Delta(2,4)-dienoyl-CoA isomerase, mitochondrial
Q13045	FLII	0.12804	0.01407	5.41352	2	FLII_HUMAN Protein flightless-1 homolog
Q13057-2	COASY	0.0617	0.00533	11.2342	2	COASY_HUMAN Isoform 2 of Bifunctional coenzyme A synthase
Q13084	MRPL28	0.16326	0.02278	4.24566	3	RM28_HUMAN 39S ribosomal protein L28, mitochondrial
Q13123	IK	0.12526	0.00595	5.53367	13	RED_HUMAN Protein Red
Q13127	REST	0.31782	0.0316	2.18094	1	REST_HUMAN RE1-silencing transcription factor
Q13136	PPFIA1	0.05463	0.00416	12.688	2	LIPA1_HUMAN Liprin-alpha-1
Q13144	EIF2B5	0.06089	0.007	11.3836	2	EI2BE_HUMAN Translation initiation factor eIF-2B subunit epsilon
Q13148	TARDBP	0.07173	0.00394	9.66328	3	TADBP_HUMAN TAR DNA-binding protein 43
Q13151	HNRNPA0	0.08199	0.00709	8.45405	1	ROA0_HUMAN Heterogeneous nuclear ribonucleoprotein A0
Q13155	AIMP2	0.12996	0.01634	5.33354	4	AIMP2_HUMAN Aminoacyl tRNA synthase complex-interacting multifunctional protein 2
Q13177	PAK2	0.06842	0.0075	10.1308	1	PAK2_HUMAN Serine/threonine-protein kinase PAK 2
Q13185	CBX3	0.03164	0.00662	21.9073	3	CBX3_HUMAN Chromobox protein homolog 3
Q13188	STK3	0.09741	0.00428	7.11577	4	STK3_HUMAN Serine/threonine-protein kinase 3
Q13190	STX5	0.04745	0.00239	14.6079	7	STX5_HUMAN Syntaxin-5
Q13191	CBLB	0.10669	0.00929	6.49683	3	CBLB_HUMAN E3 ubiquitin-protein ligase CBL-B
Q13200	PSMD2	0.11338	0.01208	6.11349	3	PSMD2_HUMAN 26S proteasome non-ATPase regulatory subunit 2
Q13217	DNAJC3	0.05485	0.00676	12.6371	7	DNJC3_HUMAN DnaJ homolog subfamily C member 3
Q13227	GPS2	0.07948	0.00578	8.72103	2	GPS2_HUMAN G protein pathway suppressor 2
Q13228	SELENBP1	0.10117	0.01441	6.85131	1	SBP1_HUMAN Selenium-binding protein 1
Q13242	SRSF9	0.09087	0.00626	7.6279	2	SRSF9_HUMAN Serine/arginine-rich splicing factor 9
Q13243	SRSF5	0.06469	0.00483	10.7149	3	SRSF5_HUMAN Serine/arginine-rich splicing factor 5
Q13263	TRIM28	0.04238	0.01001	16.3555	11	TIF1B_HUMAN Transcription intermediary factor 1-beta
Q13283	G3BP1	0.10117	0.00705	6.85131	4	G3BP1_HUMAN Ras GTPase-activating protein-binding protein 1
Q13310-3	PABPC4	0.07831	0.00554	8.85132	10	PABP4_HUMAN Isoform 3 of Polyadenylate-binding protein 4
Q13330	MTA1	0.07329	0.00606	9.4576	6	MTA1_HUMAN Metastasis-associated protein MTA1
Q13347	EIF3I	0.09712	0.00482	7.13702	2	EIF3I_HUMAN Eukaryotic translation initiation factor 3 subunit I
Q13356	PPIL2	0.07334	0.00955	9.45115	1	PPIL2_HUMAN Peptidyl-prolyl cis-trans isomerase-like 2
Q13356-2	PPIL2	0.10411	0.00661	6.65783	4	PPIL2_HUMAN Isoform 2 of Peptidyl-prolyl cis-trans isomerase-like 2
Q13362-2	PPP2R5C	0.04755	0.00578	14.5772	1	2A5G_HUMAN Isoform Gamma-1 of Serine/threonine-protein phosphatase 2A 56 kDa regulatory subunit gamma isoform
Q13362-5	PPP2R5C	0.05783	0.00412	11.9859	5	2A5G_HUMAN Isoform 5 of Serine/threonine-protein phosphatase 2A 56 kDa regulatory subunit gamma isoform
Q13404-1	UBE2V1	0.0519	0.00452	13.3554	5	UB2V1_HUMAN Isoform 1 of Ubiquitin-conjugating enzyme E2 variant 1
Q13405	MRPL49	0.15244	0.02145	4.54702	2	RM49_HUMAN 39S ribosomal protein L49, mitochondrial
Q13409	DYNC1I2	0.08511	0.00415	8.14413	1	DC1I2_HUMAN Cytoplasmic dynein 1 intermediate chain 2
Q13416	ORC2	0.0613	0.00254	11.3075	3	ORC2_HUMAN Origin recognition complex subunit 2
Q13418	ILK	0.13102	0.01278	5.29039	1	ILK_HUMAN Integrin-linked protein kinase
Q13435	SF3B2	0.09619	0.0039	7.20602	16	SF3B2_HUMAN Splicing factor 3B subunit 2
Q13439-5	GOLGA4	0.05192	0.00741	13.3503	22	GOGA4_HUMAN Isoform 5 of Golgin subfamily A member 4
Q13442	PDAP1	0.06692	0.00599	10.3578	9	HAP28_HUMAN 28 kDa heat- and acid-stable phosphoprotein
Q13443	ADAM9	0.13135	0.00641	5.2771	1	ADAM9_HUMAN Disintegrin and metalloproteinase domain-containing protein 9
Q13445	TMED1	0.03166	0.0081	21.8935	1	TMED1_HUMAN Transmembrane emp24 domain-containing protein 1
Q13451	FKBP5	0.04625	0.00426	14.987	2	FKBP5_HUMAN Peptidyl-prolyl cis-trans isomerase FKBP5
Q13492	PICALM	0.07565	0.00677	9.16255	4	PICAL_HUMAN Phosphatidylinositol-binding clathrin assembly protein
Q13501	SQSTM1	0.08628	0.00765	8.03369	4	SQSTM_HUMAN Sequestosome-1
Q13505	MTX1	0.07426	0.00515	9.33406	1	MTX1_HUMAN Metaxin-1
Q13509	TUBB3	0.05258	0.00807	13.1827	2	TBB3_HUMAN Tubulin beta-3 chain
Q13523	PRPF4B	0.02973	0.00502	23.3147	1	PRP4B_HUMAN Serine/threonine-protein kinase PRP4 homolog
Q13526	PIN1	0.06777	0.00593	10.2279	1	PIN1_HUMAN Peptidyl-prolyl cis-trans isomerase NIMA-interacting 1
Q13530	SERINC3	0.1111	0.00548	6.23895	3	SERC3_HUMAN Serine incorporator 3
Q13546	RIPK1	0.10013	0.01036	6.92247	1	RIPK1_HUMAN Receptor-interacting serine/threonine-protein kinase 1
Q13547	HDAC1	0.09859	0.00344	7.0306	3	HDAC1_HUMAN Histone deacetylase 1
Q13572	ITPK1	0.06559	0.00197	10.5679	2	ITPK1_HUMAN Inositol-tetrakisphosphate 1-kinase
Q13573	SNW1	0.13885	0.02211	4.99206	11	SNW1_HUMAN SNW domain-containing protein 1
Q13596-3	SNX1	0.06916	0.00816	10.0224	7	SNX1_HUMAN Isoform 3 of Sorting nexin-1
Q13601	KRR1	0.09742	0.00752	7.11504	9	KRR1_HUMAN KRR1 small subunit processome component homolog
Q13610	PWP1	0.06008	0.00278	11.5371	2	PWP1_HUMAN Periodic tryptophan protein 1 homolog
Q13616	CUL1	0.05141	0.00658	13.4827	7	CUL1_HUMAN Cullin-1
Q13617-2	CUL2	0.07632	0.01267	9.08212	2	CUL2_HUMAN Isoform 2 of Cullin-2
Q13618	CUL3	0.0546	0.00354	12.695	8	CUL3_HUMAN Cullin-3
Q13619	CUL4A	0.07215	0.00581	9.60703	3	CUL4A_HUMAN Cullin-4A
Q13620	CUL4B	0.04848	0.00415	14.2976	2	CUL4B_HUMAN Cullin-4B
Q13625-3	TP53BP2	0.10389	0.00281	6.67193	2	ASPP2_HUMAN Isoform 3 of Apoptosis-stimulating of p53 protein 2
Q13627	DYRK1A	0.07115	0.00386	9.74205	1	DYR1A_HUMAN Dual specificity tyrosine-phosphorylation-regulated kinase 1A
Q13636	RAB31	0.04555	0.00511	15.2173	1	RAB31_HUMAN Ras-related protein Rab-31
Q13637	RAB32	0.03192	0.00678	21.7151	3	RAB32_HUMAN Ras-related protein Rab-32
Q13642	FHL1	0.03036	0.01068	22.8309	2	FHL1_HUMAN Four and a half LIM domains protein 1
Q13724	MOGS	0.05212	0.00607	13.2991	2	MOGS_HUMAN Mannosyl-oligosaccharide glucosidase
Q13765-2	NACA	0.10521	0.00617	6.58823	1	NACA_HUMAN Isoform 2 of Nascent polypeptide-associated complex subunit alpha
Q13795	ARFRP1	0.05716	0.00509	12.1264	1	ARFRP_HUMAN ADP-ribosylation factor-related protein 1
Q13796	SHROOM2	0.0658	0.00424	10.5342	1	SHRM2_HUMAN Protein Shroom2
Q13813-2	SPTAN1	0.06127	0.01212	11.313	10	SPTN1_HUMAN Isoform 2 of Spectrin alpha chain, non-erythrocytic 1
Q13823	GNL2	0.08267	0.00863	8.38451	3	NOG2_HUMAN Nucleolar GTP-binding protein 2
Q13838-2	DDX39B	0.05142	0.00553	13.4801	6	DX39B_HUMAN Isoform 2 of Spliceosome RNA helicase DDX39B
Q13885	TUBB2A	0.05168	0.00696	13.4123	2	TBB2A_HUMAN Tubulin beta-2A chain
Q13895	BYSL	0.10975	0.00853	6.31569	1	BYST_HUMAN Bystin
Q13907-2	IDI1	0.09018	0.00626	7.68626	5	IDI1_HUMAN Isoform 2 of Isopentenyl-diphosphate Delta-isomerase 1
Q14004	CDK13	0.07137	0.00696	9.71202	5	CDK13_HUMAN Cyclin-dependent kinase 13
Q14008-3	CKAP5	0.08827	0.00543	7.85258	15	CKAP5_HUMAN Isoform 3 of Cytoskeleton-associated protein 5
Q14011	CIRBP	0.12954	0.0223	5.35084	3	CIRBP_HUMAN Cold-inducible RNA-binding protein
Q14103	HNRNPD	0.04922	0.000979683	14.0826	7	HNRPD_HUMAN Heterogeneous nuclear ribonucleoprotein D0
Q14119	VEZF1	0.09643	0.00809	7.18809	3	VEZF1_HUMAN Vascular endothelial zinc finger 1
Q14151	SAFB2	0.07347	0.00878	9.43442	2	SAFB2_HUMAN Scaffold attachment factor B2
Q14152	EIF3A	0.0691	0.00282	10.0311	9	EIF3A_HUMAN Eukaryotic translation initiation factor 3 subunit A
Q14157-1	UBAP2L	0.02871	0.01245	24.1431	1	UBP2L_HUMAN Isoform 2 of Ubiquitin-associated protein 2-like
Q14157-5	UBAP2L	0.05712	0.00649	12.1349	5	UBP2L_HUMAN Isoform 5 of Ubiquitin-associated protein 2-like
Q14165	MLEC	0.03947	0.0085	17.5614	5	MLEC_HUMAN Malectin
Q14166	TTLL12	0.03285	0.00231	21.1004	2	TTL12_HUMAN Tubulin--tyrosine ligase-like protein 12
Q14192	FHL2	0.07297	0.00835	9.49907	1	FHL2_HUMAN Four and a half LIM domains protein 2
Q14197	ICT1	0.1639	0.02369	4.22909	2	ICT1_HUMAN Peptidyl-tRNA hydrolase ICT1, mitochondrial
Q14203	DCTN1	0.08077	0.00443	8.58174	7	DCTN1_HUMAN Dynactin subunit 1
Q14204	DYNC1H1	0.10696	0.01003	6.48043	10	DYHC1_HUMAN Cytoplasmic dynein 1 heavy chain 1
Q14232	EIF2B1	0.04507	0.0034	15.3793	3	EI2BA_HUMAN Translation initiation factor eIF-2B subunit alpha
Q14240-2	EIF4A2	0.09647	0.0166	7.18511	3	IF4A2_HUMAN Isoform 2 of Eukaryotic initiation factor 4A-II
Q14241	TCEB3	0.04363	0.00422	15.8869	5	ELOA1_HUMAN Transcription elongation factor B polypeptide 3
Q14244-7	MAP7	0.06432	0.00547	10.7765	3	MAP7_HUMAN Isoform 7 of Ensconsin
Q14247	CTTN	0.02211	0.01232	31.3499	1	SRC8_HUMAN Src substrate cortactin
Q14247-2	CTTN	0.06748	0.00347	10.2719	6	SRC8_HUMAN Isoform 2 of Src substrate cortactin
Q14249	ENDOG	0.14537	0.01475	4.76816	2	NUCG_HUMAN Endonuclease G, mitochondrial
Q14258	TRIM25	0.08019	0.00491	8.64381	7	TRI25_HUMAN E3 ubiquitin/ISG15 ligase TRIM25
Q14315	FLNC	0.04504	0.01282	15.3896	7	FLNC_HUMAN Filamin-C
Q14318-2	FKBP8	0.05992	0.00509	11.5679	8	FKBP8_HUMAN Isoform 2 of Peptidyl-prolyl cis-trans isomerase FKBP8
Q14320	FAM50A	0.06247	0.00644	11.0957	8	FA50A_HUMAN Protein FAM50A
Q14344	GNA13	0.06275	0.00467	11.0462	2	GNA13_HUMAN Guanine nucleotide-binding protein subunit alpha-13
Q14435	GALNT3	0.05281	0.00314	13.1253	5	GALT3_HUMAN Polypeptide N-acetylgalactosaminyltransferase 3
Q14444	CAPRIN1	0.11402	0.01507	6.07917	6	CAPR1_HUMAN Caprin-1
Q14457	BECN1	0.1187	0.01219	5.83949	1	BECN1_HUMAN Beclin-1
Q14469	HES1	0.63182	0.13439	1.09706	1	HES1_HUMAN Transcription factor HES-1
Q14493	SLBP	0.20765	0.01869	3.33806	3	SLBP_HUMAN Histone RNA hairpin-binding protein
Q14498	RBM39	0.07848	0.00756	8.83215	4	RBM39_HUMAN RNA-binding protein 39
Q14511-3	NEDD9	0.18111	0.02375	3.82722	3	CASL_HUMAN Isoform 3 of Enhancer of filamentation 1
Q14527	HLTF	0.05712	0.00705	12.1349	9	HLTF_HUMAN Helicase-like transcription factor
Q14534	SQLE	0.14842	0.00684	4.67017	7	ERG1_HUMAN Squalene monooxygenase
Q14554	PDIA5	0.07424	0.00518	9.33657	2	PDIA5_HUMAN Protein disulfide-isomerase A5
Q14566	MCM6	0.06916	0.00361	10.0224	3	MCM6_HUMAN DNA replication licensing factor MCM6
Q14651	PLS1	0.04872	0.00931	14.2272	1	PLSI_HUMAN Plastin-1
Q14653-4	IRF3	0.0956	0.0071	7.25049	2	IRF3_HUMAN Isoform 4 of Interferon regulatory factor 3
Q14669-3	TRIP12	0.08756	0.00549	7.91625	6	TRIPC_HUMAN Isoform 3 of E3 ubiquitin-protein ligase TRIP12
Q14671-3	PUM1	0.07072	0.00716	9.80129	4	PUM1_HUMAN Isoform 3 of Pumilio homolog 1
Q14677-3	CLINT1	0.061	0.00572	11.3631	6	EPN4_HUMAN Isoform 3 of Clathrin interactor 1
Q14680	MELK	0.13578	0.01392	5.10493	2	MELK_HUMAN Maternal embryonic leucine zipper kinase
Q14687	GSE1	0.29305	0.02897	2.36529	4	GSE1_HUMAN Genetic suppressor element 1
Q14690	PDCD11	0.11657	0.0108	5.94619	1	RRP5_HUMAN Protein RRP5 homolog
Q14692	BMS1	0.07974	0.00141	8.69259	3	BMS1_HUMAN Ribosome biogenesis protein BMS1 homolog
Q14694-2	USP10	0.06641	0.00641	10.4374	4	UBP10_HUMAN Isoform 2 of Ubiquitin carboxyl-terminal hydrolase 10
Q14696	MESDC2	0.04462	0.00787	15.5345	3	MESD_HUMAN LDLR chaperone MESD
Q14697-2	GANAB	0.04819	0.0045	14.3836	6	GANAB_HUMAN Isoform 2 of Neutral alpha-glucosidase AB
Q14738	PPP2R5D	0.06718	0.01177	10.3178	2	2A5D_HUMAN Serine/threonine-protein phosphatase 2A 56 kDa regulatory subunit delta isoform
Q14739	LBR	0.04586	0.00291	15.1144	2	LBR_HUMAN Lamin-B receptor
Q14789-2	GOLGB1	0.04759	0.01328	14.565	1	GOGB1_HUMAN Isoform 2 of Golgin subfamily B member 1
Q14807	KIF22	0.20499	0.01102	3.38137	2	KIF22_HUMAN Kinesin-like protein KIF22
Q14839-2	CHD4	0.07334	0.00941	9.45115	10	CHD4_HUMAN Isoform 2 of Chromodomain-helicase-DNA-binding protein 4
Q14847	LASP1	0.05721	0.00777	12.1158	1	LASP1_HUMAN LIM and SH3 domain protein 1
Q14847-2	LASP1	0.06594	0.01142	10.5118	7	LASP1_HUMAN Isoform 2 of LIM and SH3 domain protein 1
Q14865	ARID5B	0.42013	0.05088	1.64984	2	ARI5B_HUMAN AT-rich interactive domain-containing protein 5B
Q14919-2	DRAP1	0.16627	0.02009	4.1688	1	NC2A_HUMAN Isoform 2 of Dr1-associated corepressor
Q14966	ZNF638	0.06394	0.00649	10.8406	6	ZN638_HUMAN Zinc finger protein 638
Q14974	KPNB1	0.04592	0.0031	15.0947	3	IMB1_HUMAN Importin subunit beta-1
Q14978-2	NOLC1	0.05697	0.01132	12.1669	2	NOLC1_HUMAN Isoform Beta of Nucleolar and coiled-body phosphoprotein 1
Q14980	NUMA1	0.05806	0.00658	11.9385	19	NUMA1_HUMAN Nuclear mitotic apparatus protein 1
Q14C86-6	GAPVD1	0.05712	0.00466	12.1349	5	GAPD1_HUMAN Isoform 6 of GTPase-activating protein and VPS9 domain-containing protein 1
Q14CX7	NAA25	0.03697	0.00278	18.7489	2	NAA25_HUMAN N-alpha-acetyltransferase 25, NatB auxiliary subunit
Q15003	NCAPH	0.17487	0.03347	3.96379	1	CND2_HUMAN Condensin complex subunit 2
Q15004	KIAA0101	0.27365	0.03021	2.53297	1	PAF15_HUMAN PCNA-associated factor
Q15005	SPCS2	0.09881	0.00661	7.01495	6	SPCS2_HUMAN Signal peptidase complex subunit 2
Q15006	EMC2	0.05172	0.00916	13.4019	1	EMC2_HUMAN ER membrane protein complex subunit 2
Q15007	WTAP	0.11732	0.00701	5.90818	3	FL2D_HUMAN Pre-mRNA-splicing regulator WTAP
Q15008	PSMD6	0.37845	0.08177	1.83154	9	PSMD6_HUMAN 26S proteasome non-ATPase regulatory subunit 6
Q15014	MORF4L2	0.23418	0.02098	2.95989	9	MO4L2_HUMAN Mortality factor 4-like protein 2
Q15019-2	SEPT2	0.18081	0.02492	3.83357	9	SEPT2_HUMAN Isoform 2 of Septin-2
Q15020	SART3	0.0544	0.00409	12.7417	4	SART3_HUMAN Squamous cell carcinoma antigen recognized by T-cells 3
Q15031	LARS2	0.07761	0.0083	8.93116	4	SYLM_HUMAN Probable leucine--tRNA ligase, mitochondrial
Q15041	ARL6IP1	0.07862	0.00831	8.81642	3	AR6P1_HUMAN ADP-ribosylation factor-like protein 6-interacting protein 1
Q15046-2	KARS	0.05832	0.00302	11.8852	6	SYK_HUMAN Isoform Mitochondrial of Lysine--tRNA ligase
Q15047	SETDB1	0.15955	0.01764	4.34439	2	SETB1_HUMAN Histone-lysine N-methyltransferase SETDB1
Q15054	POLD3	0.07349	0.00555	9.43186	3	DPOD3_HUMAN DNA polymerase delta subunit 3
Q15058	KIF14	0.09023	0.0061	7.682	1	KIF14_HUMAN Kinesin-like protein KIF14
Q15061	WDR43	0.14787	0.01167	4.68754	3	WDR43_HUMAN WD repeat-containing protein 43
Q15070	OXA1L	0.07938	0.006	8.73201	2	OXA1L_HUMAN Mitochondrial inner membrane protein OXA1L
Q15075	EEA1	0.05767	0.00953	12.0192	1	EEA1_HUMAN Early endosome antigen 1
Q15084-2	PDIA6	0.04558	0.00509	15.2073	4	PDIA6_HUMAN Isoform 2 of Protein disulfide-isomerase A6
Q15120-2	PDK3	0.08687	0.00637	7.97913	6	PDK3_HUMAN Isoform 2 of [Pyruvate dehydrogenase (acetyl-transferring)] kinase isozyme 3, mitochondrial
Q15149	PLEC	0.08546	0.00737	8.11078	13	PLEC_HUMAN Plectin
Q15149-4	PLEC	0.0698	0.00601	9.93048	1	PLEC_HUMAN Isoform 4 of Plectin
Q15172	PPP2R5A	0.05369	0.00527	12.9102	2	2A5A_HUMAN Serine/threonine-protein phosphatase 2A 56 kDa regulatory subunit alpha isoform
Q15173	PPP2R5B	0.05945	0.00632	11.6593	1	2A5B_HUMAN Serine/threonine-protein phosphatase 2A 56 kDa regulatory subunit beta isoform
Q15181	PPA1	0.0521	0.0031	13.3042	6	IPYR_HUMAN Inorganic pyrophosphatase
Q15185	PTGES3	0.03805	0.00144	18.2167	4	TEBP_HUMAN Prostaglandin E synthase 3
Q15198	PDGFRL	0.74595	0.15638	0.929214	1	PGFRL_HUMAN Platelet-derived growth factor receptor-like protein
Q15208	STK38	0.13127	0.01121	5.28032	2	STK38_HUMAN Serine/threonine-protein kinase 38
Q15233	NONO	0.07116	0.01014	9.74069	7	NONO_HUMAN Non-POU domain-containing octamer-binding protein
Q15257	PPP2R4	0.05875	0.00934	11.7982	6	PTPA_HUMAN Serine/threonine-protein phosphatase 2A activator
Q15286	RAB35	0.0485	0.00614	14.2917	4	RAB35_HUMAN Ras-related protein Rab-35
Q15287	RNPS1	0.07577	0.00917	9.14804	1	RNPS1_HUMAN RNA-binding protein with serine-rich domain 1
Q15334	LLGL1	0.05132	0.00639	13.5064	1	L2GL1_HUMAN Lethal(2) giant larvae protein homolog 1
Q15349-2	RPS6KA2	0.04401	0.00477	15.7498	2	KS6A2_HUMAN Isoform 2 of Ribosomal protein S6 kinase alpha-2
Q15363	TMED2	0.05151	0.01381	13.4566	5	TMED2_HUMAN Transmembrane emp24 domain-containing protein 2
Q15365	PCBP1	0.0496	0.00332	13.9747	1	PCBP1_HUMAN Poly(rC)-binding protein 1
Q15366-2	PCBP2	0.06535	0.00494	10.6067	1	PCBP2_HUMAN Isoform 2 of Poly(rC)-binding protein 2
Q15369	TCEB1	0.05235	0.00871	13.2406	1	ELOC_HUMAN Transcription elongation factor B polypeptide 1
Q15370-2	TCEB2	0.14075	0.01776	4.92467	4	ELOB_HUMAN Isoform 2 of Transcription elongation factor B polypeptide 2
Q15382	RHEB	0.0178	0.0093	38.9409	1	RHEB_HUMAN GTP-binding protein Rheb
Q15386	UBE3C	0.06557	0.00797	10.5711	1	UBE3C_HUMAN Ubiquitin-protein ligase E3C
Q15388	TOMM20	0.07171	0.00543	9.66598	3	TOM20_HUMAN Mitochondrial import receptor subunit TOM20 homolog
Q15392	DHCR24	0.09159	0.00802	7.56794	3	DHC24_HUMAN Delta(24)-sterol reductase
Q15398	DLGAP5	0.14981	0.01462	4.62684	5	DLGP5_HUMAN Disks large-associated protein 5
Q15404	RSU1	0.05902	0.00492	11.7443	3	RSU1_HUMAN Ras suppressor protein 1
Q15424-3	SAFB	0.07146	0.01025	9.69979	3	SAFB1_HUMAN Isoform 3 of Scaffold attachment factor B1
Q15427	SF3B4	0.15769	0.02644	4.39563	3	SF3B4_HUMAN Splicing factor 3B subunit 4
Q15428	SF3A2	0.06642	0.01006	10.4358	4	SF3A2_HUMAN Splicing factor 3A subunit 2
Q15435	PPP1R7	0.07272	0.00552	9.53173	1	PP1R7_HUMAN Protein phosphatase 1 regulatory subunit 7
Q15459	SF3A1	0.06409	0.01019	10.8152	7	SF3A1_HUMAN Splicing factor 3A subunit 1
Q15465	SHH	0.14183	0.01103	4.88717	5	SHH_HUMAN Sonic hedgehog protein
Q15526	SURF1	0.0777	0.00453	8.92081	1	SURF1_HUMAN Surfeit locus protein 1
Q15527	SURF2	0.07494	0.00915	9.24936	1	SURF2_HUMAN Surfeit locus protein 2
Q15554-3	TERF2	0.08589	0.00931	8.07017	2	TERF2_HUMAN Isoform 3 of Telomeric repeat-binding factor 2
Q15555	MAPRE2	0.05424	0.00588	12.7793	1	MARE2_HUMAN Microtubule-associated protein RP/EB family member 2
Q15596	NCOA2	0.43658	0.04353	1.58768	1	NCOA2_HUMAN Nuclear receptor coactivator 2
Q15599	SLC9A3R2	0.05179	0.01042	13.3838	1	NHRF2_HUMAN Na(+)/H(+) exchange regulatory cofactor NHE-RF2
Q15629	TRAM1	0.07348	0.00619	9.43314	1	TRAM1_HUMAN Translocating chain-associated membrane protein 1
Q15631	TSN	0.09395	0.00525	7.37783	1	TSN_HUMAN Translin
Q15637-5	SF1	0.06304	0.01143	10.9954	5	SF01_HUMAN Isoform 5 of Splicing factor 1
Q15643	TRIP11	0.0415	0.00648	16.7023	12	TRIPB_HUMAN Thyroid receptor-interacting protein 11
Q15649	ZNHIT3	0.19032	0.02624	3.64201	1	ZNHI3_HUMAN Zinc finger HIT domain-containing protein 3
Q15691	MAPRE1	0.06332	0.00516	10.9467	8	MARE1_HUMAN Microtubule-associated protein RP/EB family member 1
Q15717	ELAVL1	0.0587	0.00391	11.8083	5	ELAV1_HUMAN ELAV-like protein 1
Q15738	NSDHL	0.06616	0.00421	10.4768	4	NSDHL_HUMAN Sterol-4-alpha-carboxylate 3-dehydrogenase, decarboxylating
Q15742	NAB2	0.07193	0.00713	9.63641	4	NAB2_HUMAN NGFI-A-binding protein 2
Q15758	SLC1A5	0.0664	0.0064	10.439	2	AAAT_HUMAN Neutral amino acid transporter B(0)
Q15771	RAB30	0.04405	0.00868	15.7355	3	RAB30_HUMAN Ras-related protein Rab-30
Q15785	TOMM34	0.11032	0.01546	6.28306	2	TOM34_HUMAN Mitochondrial import receptor subunit TOM34
Q15813	TBCE	0.0429	0.00499	16.1573	1	TBCE_HUMAN Tubulin-specific chaperone E
Q15819	UBE2V2	0.05127	0.008	13.5195	2	UB2V2_HUMAN Ubiquitin-conjugating enzyme E2 variant 2
Q15833	STXBP2	0.07107	0.00706	9.75302	2	STXB2_HUMAN Syntaxin-binding protein 2
Q15843	NEDD8	0.05226	0.00384	13.2634	4	NEDD8_HUMAN NEDD8
Q15907	RAB11B	0.04433	0.00786	15.6361	2	RB11B_HUMAN Ras-related protein Rab-11B
Q15911	ZFHX3	0.05632	0.00425	12.3073	2	ZFHX3_HUMAN Zinc finger homeobox protein 3
Q16181	SEPT7	0.11454	0.00865	6.05157	10	SEPT7_HUMAN Septin-7
Q16186	ADRM1	0.05732	0.00658	12.0926	5	ADRM1_HUMAN Proteasomal ubiquitin receptor ADRM1
Q16342	PDCD2	0.10114	0.00618	6.85334	1	PDCD2_HUMAN Programmed cell death protein 2
Q16394	EXT1	0.05327	0.00327	13.012	1	EXT1_HUMAN Exostosin-1
Q16401	PSMD5	0.04325	0.00563	16.0265	2	PSMD5_HUMAN 26S proteasome non-ATPase regulatory subunit 5
Q16512-2	PKN1	0.076	0.01291	9.12036	5	PKN1_HUMAN Isoform 2 of Serine/threonine-protein kinase N1
Q16513	PKN2	0.07153	0.00534	9.6903	4	PKN2_HUMAN Serine/threonine-protein kinase N2
Q16514	TAF12	0.1439	0.00887	4.81687	1	TAF12_HUMAN Transcription initiation factor TFIID subunit 12
Q16537	PPP2R5E	0.08913	0.01295	7.77681	3	2A5E_HUMAN Serine/threonine-protein phosphatase 2A 56 kDa regulatory subunit epsilon isoform
Q16543	CDC37	0.0495	0.0049	14.003	8	CDC37_HUMAN Hsp90 co-chaperone Cdc37
Q16576-2	RBBP7	0.06131	0.00406	11.3056	3	RBBP7_HUMAN Isoform 2 of Histone-binding protein RBBP7
Q16625	OCLN	0.07563	0.00372	9.16498	5	OCLN_HUMAN Occludin
Q16629	SRSF7	0.06335	0.00704	10.9415	1	SRSF7_HUMAN Serine/arginine-rich splicing factor 7
Q16630-2	CPSF6	0.03141	0.00946	22.0677	5	CPSF6_HUMAN Isoform 2 of Cleavage and polyadenylation specificity factor subunit 6
Q16658	FSCN1	0.05487	0.00423	12.6325	1	FSCN1_HUMAN Fascin
Q16698	DECR1	0.16393	0.00682	4.22831	6	DECR_HUMAN 2,4-dienoyl-CoA reductase, mitochondrial
Q16706	MAN2A1	0.10474	0.00406	6.61779	1	MA2A1_HUMAN Alpha-mannosidase 2
Q16718	NDUFA5	0.09418	0.00488	7.35981	2	NDUA5_HUMAN NADH dehydrogenase [ubiquinone] 1 alpha subcomplex subunit 5
Q16739	UGCG	0.20093	0.01765	3.44969	1	CEGT_HUMAN Ceramide glucosyltransferase
Q16762	TST	0.06916	0.00501	10.0224	4	THTR_HUMAN Thiosulfate sulfurtransferase
Q16763	UBE2S	0.14349	0.00673	4.83063	2	UBE2S_HUMAN Ubiquitin-conjugating enzyme E2 S
Q16774-2	GUK1	0.04837	0.00447	14.3301	1	KGUA_HUMAN Isoform 2 of Guanylate kinase
Q16795	NDUFA9	0.07454	0.00386	9.299	4	NDUA9_HUMAN NADH dehydrogenase [ubiquinone] 1 alpha subcomplex subunit 9, mitochondrial
Q16836-2	HADH	0.05203	0.00616	13.3221	5	HCDH_HUMAN Isoform 2 of Hydroxyacyl-coenzyme A dehydrogenase, mitochondrial
Q16850	CYP51A1	0.06822	0.00979	10.1605	7	CP51A_HUMAN Lanosterol 14-alpha demethylase
Q16864-2	ATP6V1F	0.16131	0.02477	4.29699	1	VATF_HUMAN Isoform 2 of V-type proton ATPase subunit F
Q16881	TXNRD1	0.08936	0.01081	7.75679	2	TRXR1_HUMAN Thioredoxin reductase 1, cytoplasmic
Q16891	IMMT	0.04795	0.00792	14.4556	12	IMMT_HUMAN Mitochondrial inner membrane protein
Q17RS7	GEN1	0.14476	0.01303	4.78825	1	GEN_HUMAN Flap endonuclease GEN homolog 1
Q1ED39	KNOP1	0.07763	0.00696	8.92886	3	KNOP1_HUMAN Lysine-rich nucleolar protein 1
Q1KMD3	HNRNPUL2	0.04359	0.00656	15.9015	9	HNRL2_HUMAN Heterogeneous nuclear ribonucleoprotein U-like protein 2
Q1MSJ5	CSPP1	0.13427	0.00741	5.16234	1	CSPP1_HUMAN Centrosome and spindle pole-associated protein 1
Q27J81	INF2	0.0737	0.00591	9.40498	3	INF2_HUMAN Inverted formin-2
Q29RF7	PDS5A	0.06208	0.00618	11.1654	7	PDS5A_HUMAN Sister chromatid cohesion protein PDS5 homolog A
Q2NKX8	ERCC6L	0.06227	0.00481	11.1313	1	ERC6L_HUMAN DNA excision repair protein ERCC-6-like
Q2NL82	TSR1	0.08778	0.00699	7.89641	1	TSR1_HUMAN Pre-rRNA-processing protein TSR1 homolog
Q2PPJ7	RALGAPA2	0.25037	0.04843	2.76849	1	RGPA2_HUMAN Ral GTPase-activating protein subunit alpha-2
Q2TAY7	SMU1	0.08233	0.00628	8.41913	3	SMU1_HUMAN WD40 repeat-containing protein SMU1
Q2VIQ3	KIF4B	0.08904	0.01604	7.78467	3	KIF4B_HUMAN Chromosome-associated kinesin KIF4B
Q3B726	TWISTNB	0.04877	0.01212	14.2126	1	RPA43_HUMAN DNA-directed RNA polymerase I subunit RPA43
Q3KQU3	MAP7D1	0.07857	0.00729	8.82203	2	MA7D1_HUMAN MAP7 domain-containing protein 1
Q3LXA3	DAK	0.1218	0.01801	5.69086	2	DHAK_HUMAN Bifunctional ATP-dependent dihydroxyacetone kinase/FAD-AMP lyase (cyclizing)
Q3MIW9	DPCR1	0.1553	0.0318	4.46328	1	DPCR1_HUMAN Diffuse panbronchiolitis critical region protein 1
Q3T8J9	GON4L	0.12646	0.00578	5.48116	1	GON4L_HUMAN GON-4-like protein
Q3YEC7-2	RABL6	0.07419	0.00409	9.34287	2	RABL6_HUMAN Isoform 2 of Rab-like protein 6
Q3ZAQ7	VMA21	0.0453	0.00456	15.3013	1	VMA21_HUMAN Vacuolar ATPase assembly integral membrane protein VMA21
Q3ZCQ8-2	TIMM50	0.04934	0.00704	14.0484	2	TIM50_HUMAN Isoform 2 of Mitochondrial import inner membrane translocase subunit TIM50
Q460N5	PARP14	0.05883	0.00831	11.7822	2	PAR14_HUMAN Poly [ADP-ribose] polymerase 14
Q49A26	GLYR1	0.09596	0.00617	7.22329	5	GLYR1_HUMAN Putative oxidoreductase GLYR1
Q49B96	COX19	0.11896	0.00563	5.82672	1	COX19_HUMAN Cytochrome c oxidase assembly protein COX19
Q4G176	ACSF3	0.05561	0.00318	12.4644	1	ACSF3_HUMAN Acyl-CoA synthetase family member 3, mitochondrial
Q4KMP7	TBC1D10B	0.06019	0.00367	11.516	3	TB10B_HUMAN TBC1 domain family member 10B
Q4KMQ1	TPRN	0.06116	0.00535	11.3333	1	TPRN_HUMAN Taperin
Q4LE39	ARID4B	0.08792	0.01045	7.88384	1	ARI4B_HUMAN AT-rich interactive domain-containing protein 4B
Q4U2R6	MRPL51	0.1488	0.02415	4.65825	1	RM51_HUMAN 39S ribosomal protein L51, mitochondrial
Q4VC05-2	BCL7A	0.07272	0.00899	9.53173	1	BCL7A_HUMAN Isoform 2 of B-cell CLL/lymphoma 7 protein family member A
Q4ZG55	GREB1	0.1896	0.01547	3.65584	2	GREB1_HUMAN Protein GREB1
Q52LJ0-2	FAM98B	0.06836	0.00793	10.1397	2	FA98B_HUMAN Isoform 2 of Protein FAM98B
Q53F19	C17orf85	0.06685	0.00718	10.3687	2	CQ085_HUMAN Uncharacterized protein C17orf85
Q53FV1	ORMDL2	0.08246	0.00595	8.40586	3	ORML2_HUMAN ORM1-like protein 2
Q53GA4	PHLDA2	0.312	0.03074	2.22163	1	PHLA2_HUMAN Pleckstrin homology-like domain family A member 2
Q53GQ0	HSD17B12	0.06189	0.00412	11.1997	3	DHB12_HUMAN Estradiol 17-beta-dehydrogenase 12
Q53GS9	USP39	0.05427	0.004	12.7722	2	SNUT2_HUMAN U4/U6.U5 tri-snRNP-associated protein 2
Q53H12	AGK	0.05035	0.00179	13.7666	7	AGK_HUMAN Acylglycerol kinase, mitochondrial
Q53H82	LACTB2	0.05944	0.0065	11.6613	1	LACB2_HUMAN Beta-lactamase-like protein 2
Q53HC0	CCDC92	0.16744	0.0074	4.13967	1	CCD92_HUMAN Coiled-coil domain-containing protein 92
Q53SF7	COBLL1	0.07216	0.00604	9.6057	7	COBL1_HUMAN Cordon-bleu protein-like 1
Q53T94	TAF1B	0.34608	0.05345	2.00285	1	TAF1B_HUMAN TATA box-binding protein-associated factor RNA polymerase I subunit B
Q562F6	SGOL2	0.13235	0.00463	5.23723	3	SGOL2_HUMAN Shugoshin-like 2
Q562R1	ACTBL2	0.05576	0.00273	12.4309	1	ACTBL_HUMAN Beta-actin-like protein 2
Q56A73	SPIN4	0.21545	0.01515	3.21721	1	SPIN4_HUMAN Spindlin-4
Q56NI9	ESCO2	0.15695	0.00842	4.41636	2	ESCO2_HUMAN N-acetyltransferase ESCO2
Q56VL3	OCIAD2	0.05464	0.00602	12.6857	4	OCAD2_HUMAN OCIA domain-containing protein 2
Q5BJF6	ODF2	0.29879	0.06566	2.31985	3	ODFP2_HUMAN Outer dense fiber protein 2
Q5BKY9	FAM133B	0.08025	0.00915	8.63735	2	F133B_HUMAN Protein FAM133B
Q5CZC0	FSIP2	0.05998	0.00933	11.5563	1	FSIP2_HUMAN Fibrous sheath-interacting protein 2
Q5D1E8	ZC3H12A	0.14836	0.01957	4.67206	2	ZC12A_HUMAN Ribonuclease ZC3H12A
Q5EBL8-2	PDZD11	0.12822	0.01451	5.40592	1	PDZ11_HUMAN Isoform 2 of PDZ domain-containing protein 11
Q5F1R6-2	DNAJC21	0.07346	0.00495	9.43571	2	DJC21_HUMAN Isoform 2 of DnaJ homolog subfamily C member 21
Q5H9R7-5	PPP6R3	0.07986	0.00831	8.67953	1	PP6R3_HUMAN Isoform 5 of Serine/threonine-protein phosphatase 6 regulatory subunit 3
Q5HYI7	MTX3	0.06354	0.00492	10.9088	3	MTX3_HUMAN Metaxin-3
Q5HYJ3	FAM76B	0.04215	0.00519	16.4448	2	FA76B_HUMAN Protein FAM76B
Q5HYK3	COQ5	0.15267	0.01578	4.54017	1	COQ5_HUMAN 2-methoxy-6-polyprenyl-1,4-benzoquinol methylase, mitochondrial
Q5J8M3	EMC4	0.07159	0.00677	9.68218	2	EMC4_HUMAN ER membrane protein complex subunit 4
Q5JPE7	NOMO2	0.09138	0.00272	7.58533	1	NOMO2_HUMAN Nodal modulator 2
Q5JPI3	C3orf38	0.10242	0.01144	6.76769	1	CC038_HUMAN Uncharacterized protein C3orf38
Q5JRX3-2	PITRM1	0.05963	0.00678	11.6241	6	PREP_HUMAN Isoform 2 of Presequence protease, mitochondrial
Q5JSZ5	PRRC2B	0.09547	0.00794	7.26037	12	PRC2B_HUMAN Protein PRRC2B
Q5JTH9	RRP12	0.06366	0.00336	10.8883	10	RRP12_HUMAN RRP12-like protein
Q5JTV8	TOR1AIP1	0.05323	0.00634	13.0217	5	TOIP1_HUMAN Torsin-1A-interacting protein 1
Q5JVF3-4	PCID2	0.06694	0.00689	10.3548	2	PCID2_HUMAN Isoform 4 of PCI domain-containing protein 2
Q5JXB2	UBE2NL	0.06258	0.01052	11.0762	2	UE2NL_HUMAN Putative ubiquitin-conjugating enzyme E2 N-like
Q5M775	SPECC1	0.07609	0.00412	9.10957	6	CYTSB_HUMAN Cytospin-B
Q5MIZ7	SMEK2	0.06363	0.00574	10.8934	1	P4R3B_HUMAN Serine/threonine-protein phosphatase 4 regulatory subunit 3B
Q5PRF9	SAMD4B	0.05715	0.00541	12.1286	3	SMAG2_HUMAN Protein Smaug homolog 2
Q5QNW6-2	HIST2H2BF	0.03642	0.00691	19.032	4	H2B2F_HUMAN Isoform 2 of Histone H2B type 2-F
Q5SGD2	PPM1L	0.08695	0.00783	7.97179	1	PPM1L_HUMAN Protein phosphatase 1L
Q5SRE5	NUP188	0.1706	0.01037	4.063	1	NU188_HUMAN Nucleoporin NUP188 homolog
Q5SSJ5	HP1BP3	0.05701	0.00653	12.1583	15	HP1B3_HUMAN Heterochromatin protein 1-binding protein 3
Q5STZ8	ABCF1	0.01684	0.02482	41.1608	1	Q5STZ8_HUMAN ATP-binding cassette sub-family F member 1 (Fragment)
Q5SW96	LDLRAP1	0.08342	0.00731	8.30912	2	ARH_HUMAN Low density lipoprotein receptor adapter protein 1
Q5SWX8	ODR4	0.14553	0.00557	4.76292	1	ODR4_HUMAN Protein odr-4 homolog
Q5T0D9	TPRG1L	0.13314	0.01337	5.20615	1	TPRGL_HUMAN Tumor protein p63-regulated gene 1-like protein
Q5T0N5	FNBP1L	0.06895	0.00541	10.0529	1	FBP1L_HUMAN Formin-binding protein 1-like
Q5T0W9	FAM83B	0.0518	0.00617	13.3812	10	FA83B_HUMAN Protein FAM83B
Q5T1J5	CHCHD2P9	0.52028	0.07644	1.33226	1	CHCH9_HUMAN Putative coiled-coil-helix-coiled-coil-helix domain-containing protein CHCHD2P9, mitochondrial
Q5T2T1	MPP7	0.06244	0.0037	11.101	3	MPP7_HUMAN MAGUK p55 subfamily member 7
Q5T3I0-3	GPATCH4	0.09891	0.00564	7.00786	6	GPTC4_HUMAN Isoform 3 of G patch domain-containing protein 4
Q5T3J3	LRIF1	0.08643	0.00633	8.01975	2	LRIF1_HUMAN Ligand-dependent nuclear receptor-interacting factor 1
Q5T4F4-3	ZFYVE27	0.07121	0.01132	9.73385	1	ZFY27_HUMAN Isoform 3 of Protrudin
Q5T5P2	KIAA1217	0.07778	0.0045	8.91164	3	SKT_HUMAN Sickle tail protein homolog
Q5T5U3	ARHGAP21	0.05537	0.00691	12.5185	2	RHG21_HUMAN Rho GTPase-activating protein 21
Q5T5Y3-3	CAMSAP1	0.06446	0.00414	10.7531	2	CAMP1_HUMAN Isoform 3 of Calmodulin-regulated spectrin-associated protein 1
Q5T6V5	C9orf64	0.05033	0.00344	13.772	2	CI064_HUMAN UPF0553 protein C9orf64
Q5T8D3	ACBD5	0.06078	0.00511	11.4042	6	ACBD5_HUMAN Acyl-CoA-binding domain-containing protein 5
Q5T8I3	FAM102B	0.10524	0.00931	6.58635	2	F102B_HUMAN Protein FAM102B
Q5T8P6	RBM26	0.08646	0.00301	8.01697	4	RBM26_HUMAN RNA-binding protein 26
Q5T9A4	ATAD3B	0.06198	0.00311	11.1834	5	ATD3B_HUMAN ATPase family AAA domain-containing protein 3B
Q5TFE4	NT5DC1	0.01866	0.00417	37.1462	7	NT5D1_HUMAN 5'-nucleotidase domain-containing protein 1
Q5TGZ0	MINOS1	0.06149	0.00779	11.2725	1	MOS1_HUMAN Mitochondrial inner membrane organizing system protein 1
Q5TH69	ARFGEF3	0.05484	0.00688	12.6394	1	BIG3_HUMAN Brefeldin A-inhibited guanine nucleotide-exchange protein 3
Q5U5X0	LYRM7	0.05592	0.00562	12.3953	2	LYRM7_HUMAN Complex III assembly factor LYRM7
Q5UCC4	EMC10	0.07116	0.00489	9.74069	1	EMC10_HUMAN ER membrane protein complex subunit 10
Q5UIP0	RIF1	0.0748	0.01436	9.26667	3	RIF1_HUMAN Telomere-associated protein RIF1
Q5VIR6-4	VPS53	0.13686	0.01066	5.06464	2	VPS53_HUMAN Isoform 4 of Vacuolar protein sorting-associated protein 53 homolog
Q5VSL9	STRIP1	0.10334	0.00851	6.70744	1	STRP1_HUMAN Striatin-interacting protein 1
Q5VT06	CEP350	0.10681	0.00553	6.48953	3	CE350_HUMAN Centrosome-associated protein 350
Q5VT52	RPRD2	0.06873	0.00258	10.0851	10	RPRD2_HUMAN Regulation of nuclear pre-mRNA domain-containing protein 2
Q5VTE0	EEF1A1P5	0.05846	0.00404	11.8568	8	EF1A3_HUMAN Putative elongation factor 1-alpha-like 3
Q5VTQ0	TTC39B	0.09462	0.00825	7.32559	1	TT39B_HUMAN Tetratricopeptide repeat protein 39B
Q5VV41	ARHGEF16	0.05814	0.00945	11.922	3	ARHGG_HUMAN Rho guanine nucleotide exchange factor 16
Q5VV42	CDKAL1	0.09262	0.00632	7.48377	2	CDKAL_HUMAN Threonylcarbamoyladenosine tRNA methylthiotransferase
Q5VW32	BROX	0.06587	0.00647	10.523	6	BROX_HUMAN BRO1 domain-containing protein BROX
Q5VW38	GPR107	0.07383	0.004	9.38842	2	GP107_HUMAN Protein GPR107
Q5VWG9	TAF3	0.10505	0.01067	6.59826	1	TAF3_HUMAN Transcription initiation factor TFIID subunit 3
Q5VWQ0	RSBN1	0.07907	0.00397	8.76625	1	RSBN1_HUMAN Round spermatid basic protein 1
Q5VWZ2	LYPLAL1	0.05816	0.00244	11.9179	3	LYPL1_HUMAN Lysophospholipase-like protein 1
Q5VX52	SPATA1	0.06468	0.00772	10.7166	1	SPAT1_HUMAN Spermatogenesis-associated protein 1
Q5VYK3	ECM29	0.06442	0.00391	10.7598	3	ECM29_HUMAN Proteasome-associated protein ECM29 homolog
Q5VZE5	NAA35	0.08465	0.01242	8.18839	1	NAA35_HUMAN N-alpha-acetyltransferase 35, NatC auxiliary subunit
Q5XKP0	QIL1	0.05195	0.00546	13.3426	2	QIL1_HUMAN Protein QIL1
Q66K64	DCAF15	0.15878	0.01303	4.36546	1	DCA15_HUMAN DDB1- and CUL4-associated factor 15
Q66K79	CPZ	0.09526	0.00487	7.27637	1	CBPZ_HUMAN Carboxypeptidase Z
Q676U5	ATG16L1	0.13291	0.0155	5.21516	1	A16L1_HUMAN Autophagy-related protein 16-1
Q68D10	SPTY2D1	0.09956	0.01064	6.96211	3	SPT2_HUMAN Protein SPT2 homolog
Q69YH5	CDCA2	0.15907	0.00687	4.3575	6	CDCA2_HUMAN Cell division cycle-associated protein 2
Q69YQ0	SPECC1L	0.07723	0.00653	8.9751	2	CYTSA_HUMAN Cytospin-A
Q69YU5	C12orf73	0.04931	0.0059	14.0569	1	CL073_HUMAN Uncharacterized protein C12orf73
Q6AI08	HEATR6	0.11523	0.01388	6.01534	1	HEAT6_HUMAN HEAT repeat-containing protein 6
Q6DD87	ZNF787	0.0647	0.00562	10.7132	1	ZN787_HUMAN Zinc finger protein 787
Q6DD88	ATL3	0.05316	0.00645	13.0389	3	ATLA3_HUMAN Atlastin-3
Q6DKI1	RPL7L1	0.07717	0.00387	8.98208	6	RL7L_HUMAN 60S ribosomal protein L7-like 1
Q6DN03	HIST2H2BC	0.02902	0.00668	23.8852	1	H2B2C_HUMAN Putative histone H2B type 2-C
Q6DN90	IQSEC1	0.11277	0.00763	6.14656	1	IQEC1_HUMAN IQ motif and SEC7 domain-containing protein 1
Q6GQQ9	OTUD7B	0.06793	0.00798	10.2038	1	OTU7B_HUMAN OTU domain-containing protein 7B
Q6H3X3	RAET1G	0.1239	0.00899	5.59441	1	RET1G_HUMAN Retinoic acid early transcript 1G protein
Q6I9Y2	THOC7	0.87499	0.20247	0.792177	2	THOC7_HUMAN THO complex subunit 7 homolog
Q6IAA8	LAMTOR1	0.07216	0.00416	9.6057	2	LTOR1_HUMAN Ragulator complex protein LAMTOR1
Q6IAN0	DHRS7B	0.06311	0.00583	10.9832	1	DRS7B_HUMAN Dehydrogenase/reductase SDR family member 7B
Q6IBS0	TWF2	0.04643	0.00412	14.9289	2	TWF2_HUMAN Twinfilin-2
Q6IN85	SMEK1	0.05457	0.00813	12.702	1	P4R3A_HUMAN Serine/threonine-protein phosphatase 4 regulatory subunit 3A
Q6IPM2	IQCE	0.45162	0.11857	1.5348	1	IQCE_HUMAN IQ domain-containing protein E
Q6IQ22	RAB12	0.06625	0.00483	10.4626	3	RAB12_HUMAN Ras-related protein Rab-12
Q6IQ23-2	PLEKHA7	0.08173	0.00954	8.48094	1	PKHA7_HUMAN Isoform 2 of Pleckstrin homology domain-containing family A member 7
Q6ISB3	GRHL2	0.11107	0.00499	6.24063	7	GRHL2_HUMAN Grainyhead-like protein 2 homolog
Q6KCM7-3	SLC25A25	0.09971	0.00469	6.95163	2	SCMC2_HUMAN Isoform 3 of Calcium-binding mitochondrial carrier protein SCaMC-2
Q6N021	TET2	0.1204	0.00398	5.75704	2	TET2_HUMAN Methylcytosine dioxygenase TET2
Q6NS38	ALKBH2	0.14378	0.00939	4.82089	1	ALKB2_HUMAN Alpha-ketoglutarate-dependent dioxygenase alkB homolog 2
Q6NUK1	SLC25A24	0.04183	0.00735	16.5706	14	SCMC1_HUMAN Calcium-binding mitochondrial carrier protein SCaMC-1
Q6NUM9	RETSAT	0.0589	0.0028	11.7682	1	RETST_HUMAN All-trans-retinol 13,14-reductase
Q6NUQ4	TMEM214	0.07622	0.00637	9.09403	5	TM214_HUMAN Transmembrane protein 214
Q6NV74	KIAA1211L	0.08798	0.00826	7.87846	1	K121L_HUMAN Uncharacterized protein KIAA1211-like
Q6NVY1	HIBCH	0.0476	0.00605	14.5619	2	HIBCH_HUMAN 3-hydroxyisobutyryl-CoA hydrolase, mitochondrial
Q6NW34	C3orf17	0.05067	0.00402	13.6796	2	CC017_HUMAN Uncharacterized protein C3orf17
Q6NXG1	ESRP1	0.10524	0.0084	6.58635	5	ESRP1_HUMAN Epithelial splicing regulatory protein 1
Q6NXR4	TTI2	0.07609	0.00973	9.10957	1	TTI2_HUMAN TELO2-interacting protein 2
Q6P0N0	MIS18BP1	0.15116	0.00786	4.58552	2	M18BP_HUMAN Mis18-binding protein 1
Q6P1A2	LPCAT3	0.07048	0.00293	9.83466	1	MBOA5_HUMAN Lysophospholipid acyltransferase 5
Q6P1J9	CDC73	0.08993	0.00186	7.70763	12	CDC73_HUMAN Parafibromin
Q6P1M3	LLGL2	0.07302	0.00579	9.49257	2	L2GL2_HUMAN Lethal(2) giant larvae protein homolog 2
Q6P1N0	CC2D1A	0.08919	0.00845	7.77158	5	C2D1A_HUMAN Coiled-coil and C2 domain-containing protein 1A
Q6P1N9	TATDN1	0.06007	0.00355	11.539	3	TATD1_HUMAN Putative deoxyribonuclease TATDN1
Q6P1R4	DUS1L	0.11485	0.01115	6.03524	1	DUS1L_HUMAN tRNA-dihydrouridine(16/17) synthase [NAD(P)(+)]-like
Q6P2C8	MED27	0.17724	0.0112	3.91078	5	MED27_HUMAN Mediator of RNA polymerase II transcription subunit 27
Q6P2H3	CEP85	0.12755	0.01057	5.43432	2	CEP85_HUMAN Centrosomal protein of 85 kDa
Q6P2I3	FAHD2B	0.06455	0.00354	10.7381	1	FAH2B_HUMAN Fumarylacetoacetate hydrolase domain-containing protein 2B
Q6P2Q9	PRPF8	0.15981	0.01195	4.33732	7	PRP8_HUMAN Pre-mRNA-processing-splicing factor 8
Q6P3W7	SCYL2	0.04723	0.0049	14.676	5	SCYL2_HUMAN SCY1-like protein 2
Q6P3X3	TTC27	0.0597	0.00395	11.6105	1	TTC27_HUMAN Tetratricopeptide repeat protein 27
Q6P996	PDXDC1	0.06518	0.00542	10.6344	2	PDXD1_HUMAN Pyridoxal-dependent decarboxylase domain-containing protein 1
Q6PD62	CTR9	0.06358	0.00458	10.902	4	CTR9_HUMAN RNA polymerase-associated protein CTR9 homolog
Q6PH85	DCUN1D2	0.06249	0.00658	11.0921	1	DCNL2_HUMAN DCN1-like protein 2
Q6PI48	DARS2	0.09131	0.00565	7.59114	2	SYDM_HUMAN Aspartate--tRNA ligase, mitochondrial
Q6PII3	CCDC174	0.09622	0.00667	7.20377	1	CC174_HUMAN Coiled-coil domain-containing protein 174
Q6PIU2-2	NCEH1	0.0598	0.00284	11.5911	2	NCEH1_HUMAN Isoform 2 of Neutral cholesterol ester hydrolase 1
Q6PJG2	ELMSAN1	0.1053	0.00509	6.58259	3	EMSA1_HUMAN ELM2 and SANT domain-containing protein 1
Q6PJT7	ZC3H14	0.06239	0.0043	11.1099	7	ZC3HE_HUMAN Zinc finger CCCH domain-containing protein 14
Q6PK04	CCDC137	0.08306	0.00893	8.34514	3	CC137_HUMAN Coiled-coil domain-containing protein 137
Q6PKG0	LARP1	0.0698	0.00759	9.93048	13	LARP1_HUMAN La-related protein 1
Q6PL18	ATAD2	0.12937	0.00272	5.35787	4	ATAD2_HUMAN ATPase family AAA domain-containing protein 2
Q6S8J3	POTEE	very slow	0.16749	>200	3	POTEE_HUMAN POTE ankyrin domain family member E
Q6UB35	MTHFD1L	0.07154	0.00541	9.68895	3	C1TM_HUMAN Monofunctional C1-tetrahydrofolate synthase, mitochondrial
Q6UW56-3	ATRAID	0.13719	0.00895	5.05246	1	ARAID_HUMAN Isoform 3 of All-trans retinoic acid-induced differentiation factor
Q6UWH4-2	FAM198B	0.0639	0.01846	10.8474	1	F198B_HUMAN Isoform 2 of Protein FAM198B
Q6UWU4-2	C6orf89	0.09152	0.00864	7.57372	2	CF089_HUMAN Isoform 2 of Bombesin receptor-activated protein C6orf89
Q6UXG2	KIAA1324	0.18231	0.02441	3.80203	1	K1324_HUMAN UPF0577 protein KIAA1324
Q6UXN9	WDR82	0.05719	0.0052	12.1201	4	WDR82_HUMAN WD repeat-containing protein 82
Q6UXV4	APOOL	0.07018	0.00563	9.87671	2	APOOL_HUMAN Apolipoprotein O-like
Q6W2J9	BCOR	0.20221	0.01593	3.42786	4	BCOR_HUMAN BCL-6 corepressor
Q6WKZ4	RAB11FIP1	0.06167	0.01048	11.2396	4	RFIP1_HUMAN Rab11 family-interacting protein 1
Q6XE24	RBMS3	0.05592	0.00514	12.3953	2	RBMS3_HUMAN RNA-binding motif, single-stranded-interacting protein 3
Q6XZF7	DNMBP	0.05676	0.0042	12.2119	5	DNMBP_HUMAN Dynamin-binding protein
Q6Y1H2	PTPLB	0.06137	0.0058	11.2946	2	HACD2_HUMAN Very-long-chain (3R)-3-hydroxyacyl-[acyl-carrier protein] dehydratase 2
Q6Y7W6-3	GIGYF2	0.0403	0.00427	17.1997	5	PERQ2_HUMAN Isoform 2 of PERQ amino acid-rich with GYF domain-containing protein 2
Q6YN16	HSDL2	0.05971	0.00707	11.6086	9	HSDL2_HUMAN Hydroxysteroid dehydrogenase-like protein 2
Q6ZMG9-2	CERS6	0.05199	0.00472	13.3323	2	CERS6_HUMAN Isoform 2 of Ceramide synthase 6
Q6ZN55-2	ZNF574	0.07161	0.00859	9.67947	1	ZN574_HUMAN Isoform 2 of Zinc finger protein 574
Q6ZNB6	NFXL1	0.06494	0.00539	10.6737	2	NFXL1_HUMAN NF-X1-type zinc finger protein NFXL1
Q6ZRP7	QSOX2	0.05767	0.00595	12.0192	4	QSOX2_HUMAN Sulfhydryl oxidase 2
Q6ZRV2	FAM83H	0.09426	0.0077	7.35357	2	FA83H_HUMAN Protein FAM83H
Q6ZT07	TBC1D9	0.10987	0.00248	6.30879	2	TBCD9_HUMAN TBC1 domain family member 9
Q71RC2-4	LARP4	0.08115	0.0067	8.54155	6	LARP4_HUMAN Isoform 4 of La-related protein 4
Q71U36	TUBA1A	0.03793	0.00256	18.2744	1	TBA1A_HUMAN Tubulin alpha-1A chain
Q71UM5	RPS27L	0.17103	0.03609	4.05278	1	RS27L_HUMAN 40S ribosomal protein S27-like
Q76FK4	NOL8	0.08928	0.0087	7.76375	3	NOL8_HUMAN Nucleolar protein 8
Q7KZF4	SND1	0.06685	0.00264	10.3687	8	SND1_HUMAN Staphylococcal nuclease domain-containing protein 1
Q7KZI7	MARK2	0.08753	0.00725	7.91897	2	MARK2_HUMAN Serine/threonine-protein kinase MARK2
Q7KZN9	COX15	0.07215	0.00653	9.60703	1	COX15_HUMAN Cytochrome c oxidase assembly protein COX15 homolog
Q7L014	DDX46	0.04778	0.00552	14.5071	12	DDX46_HUMAN Probable ATP-dependent RNA helicase DDX46
Q7L0Y3	TRMT10C	0.05113	0.00593	13.5566	9	MRRP1_HUMAN Mitochondrial ribonuclease P protein 1
Q7L1Q6-3	BZW1	0.08963	0.00386	7.73343	16	BZW1_HUMAN Isoform 3 of Basic leucine zipper and W2 domain-containing protein 1
Q7L2E3-2	DHX30	0.07251	0.00454	9.55933	6	DHX30_HUMAN Isoform 2 of Putative ATP-dependent RNA helicase DHX30
Q7L2H7	EIF3M	0.11081	0.011	6.25528	4	EIF3M_HUMAN Eukaryotic translation initiation factor 3 subunit M
Q7L2J0	MEPCE	0.02391	0.00705	28.9898	2	MEPCE_HUMAN 7SK snRNA methylphosphate capping enzyme
Q7L2Z9	CENPQ	0.1507	0.01168	4.59952	1	CENPQ_HUMAN Centromere protein Q
Q7L3B6	CDC37L1	0.05161	0.0073	13.4305	2	CD37L_HUMAN Hsp90 co-chaperone Cdc37-like 1
Q7L4I2	RSRC2	0.08973	0.01371	7.72481	4	RSRC2_HUMAN Arginine/serine-rich coiled-coil protein 2
Q7L590	MCM10	0.25472	0.02784	2.72121	3	MCM10_HUMAN Protein MCM10 homolog
Q7L592	NDUFAF7	0.07107	0.00393	9.75302	1	NDUF7_HUMAN NADH dehydrogenase [ubiquinone] complex I, assembly factor 7
Q7L7X3	TAOK1	0.0714	0.00636	9.70794	2	TAOK1_HUMAN Serine/threonine-protein kinase TAO1
Q7LBC6	KDM3B	0.08367	0.00843	8.2843	1	KDM3B_HUMAN Lysine-specific demethylase 3B
Q7LBR1	CHMP1B	0.07081	0.009	9.78883	5	CHM1B_HUMAN Charged multivesicular body protein 1b
Q7RTV0	PHF5A	0.06955	0.00641	9.96617	4	PHF5A_HUMAN PHD finger-like domain-containing protein 5A
Q7Z2W4	ZC3HAV1	0.0391	0.00714	17.7275	3	ZCCHV_HUMAN Zinc finger CCCH-type antiviral protein 1
Q7Z388	DPY19L4	0.10399	0.00403	6.66552	1	D19L4_HUMAN Probable C-mannosyltransferase DPY19L4
Q7Z3J2	C16orf62	0.07222	0.00584	9.59772	1	CP062_HUMAN UPF0505 protein C16orf62
Q7Z3K3	POGZ	0.16418	0.00915	4.22187	1	POGZ_HUMAN Pogo transposable element with ZNF domain
Q7Z417	NUFIP2	0.12333	0.0132	5.62026	5	NUFP2_HUMAN Nuclear fragile X mental retardation-interacting protein 2
Q7Z460	CLASP1	0.06096	0.0016	11.3705	5	CLAP1_HUMAN CLIP-associating protein 1
Q7Z478	DHX29	0.03672	0.00335	18.8766	11	DHX29_HUMAN ATP-dependent RNA helicase DHX29
Q7Z4H7	HAUS6	0.09183	0.00847	7.54816	1	HAUS6_HUMAN HAUS augmin-like complex subunit 6
Q7Z4V5-3	HDGFRP2	0.06618	0.00269	10.4737	1	HDGR2_HUMAN Isoform 3 of Hepatoma-derived growth factor-related protein 2
Q7Z4W1	DCXR	0.08454	0.00997	8.19904	2	DCXR_HUMAN L-xylulose reductase
Q7Z5G4	GOLGA7	0.10844	0.00802	6.39199	2	GOGA7_HUMAN Golgin subfamily A member 7
Q7Z5H4	VN1R5	0.14317	0.01665	4.84143	1	VN1R5_HUMAN Vomeronasal type-1 receptor 5
Q7Z5L9	IRF2BP2	0.07336	0.00681	9.44857	2	I2BP2_HUMAN Interferon regulatory factor 2-binding protein 2
Q7Z6B7	SRGAP1	0.06627	0.00309	10.4594	2	SRGP1_HUMAN SLIT-ROBO Rho GTPase-activating protein 1
Q7Z6E9	RBBP6	0.02432	0.00525	28.5011	8	RBBP6_HUMAN E3 ubiquitin-protein ligase RBBP6
Q7Z6M2	FBXO33	0.08108	0.00593	8.54893	1	FBX33_HUMAN F-box only protein 33
Q7Z6Z7	HUWE1	0.05785	0.00703	11.9818	1	HUWE1_HUMAN E3 ubiquitin-protein ligase HUWE1
Q7Z739	YTHDF3	0.07781	0.00491	8.9082	3	YTHD3_HUMAN YTH domain family protein 3
Q7Z7H5	TMED4	0.09583	0.01365	7.23309	1	TMED4_HUMAN Transmembrane emp24 domain-containing protein 4
Q7Z7K0	CMC1	0.07433	0.00346	9.32527	3	COXM1_HUMAN COX assembly mitochondrial protein homolog
Q86SF2	GALNT7	0.06499	0.00541	10.6654	4	GALT7_HUMAN N-acetylgalactosaminyltransferase 7
Q86SQ4-3	GPR126	0.06727	0.00272	10.304	2	GP126_HUMAN Isoform 3 of G-protein coupled receptor 126
Q86SX6	GLRX5	0.11096	0.00917	6.24682	1	GLRX5_HUMAN Glutaredoxin-related protein 5, mitochondrial
Q86TN4-4	TRPT1	0.03453	0.00554	20.0738	1	TRPT1_HUMAN Isoform 4 of tRNA 2'-phosphotransferase 1
Q86U06	RBM23	0.25642	0.02926	2.70317	1	RBM23_HUMAN Probable RNA-binding protein 23
Q86UE4	MTDH	0.0527	0.00578	13.1527	7	LYRIC_HUMAN Protein LYRIC
Q86UK7	ZNF598	0.05844	0.00265	11.8608	1	ZN598_HUMAN Zinc finger protein 598
Q86UP2	KTN1	0.04329	0.01276	16.0117	10	KTN1_HUMAN Kinectin
Q86UQ4	ABCA13	0.0393	0.00514	17.6373	1	ABCAD_HUMAN ATP-binding cassette sub-family A member 13
Q86UU0	BCL9L	0.09201	0.00643	7.53339	5	BCL9L_HUMAN B-cell CLL/lymphoma 9-like protein
Q86V81	ALYREF	0.24766	0.06601	2.79879	2	THOC4_HUMAN THO complex subunit 4
Q86VI3	IQGAP3	0.08833	0.00427	7.84725	1	IQGA3_HUMAN Ras GTPase-activating-like protein IQGAP3
Q86VM9	ZC3H18	0.07619	0.00512	9.09761	9	ZCH18_HUMAN Zinc finger CCCH domain-containing protein 18
Q86VP6	CAND1	0.03265	0.00295	21.2296	13	CAND1_HUMAN Cullin-associated NEDD8-dissociated protein 1
Q86VY4	TSPYL5	0.1071	0.01389	6.47196	1	TSYL5_HUMAN Testis-specific Y-encoded-like protein 5
Q86W50	METTL16	0.05659	0.00418	12.2486	1	MET16_HUMAN Methyltransferase-like protein 16
Q86W92	PPFIBP1	0.08822	0.00368	7.85703	6	LIPB1_HUMAN Liprin-beta-1
Q86WA8	LONP2	0.10628	0.00994	6.5219	1	LONP2_HUMAN Lon protease homolog 2, peroxisomal
Q86WJ1	CHD1L	0.05564	0.00346	12.4577	3	CHD1L_HUMAN Chromodomain-helicase-DNA-binding protein 1-like
Q86XL3	ANKLE2	0.08917	0.00405	7.77332	5	ANKL2_HUMAN Ankyrin repeat and LEM domain-containing protein 2
Q86XN7	PROSER1	0.07565	0.00892	9.16255	1	PRSR1_HUMAN Proline and serine-rich protein 1
Q86XP3	DDX42	0.06315	0.00433	10.9762	5	DDX42_HUMAN ATP-dependent RNA helicase DDX42
Q86XR7-2	TICAM2	0.04864	0.00435	14.2506	2	TCAM2_HUMAN Isoform 2 of TIR domain-containing adapter molecule 2
Q86Y07	VRK2	0.07191	0.00222	9.63909	1	VRK2_HUMAN Serine/threonine-protein kinase VRK2
Q86Y37	CACUL1	0.07348	0.00522	9.43314	1	CACL1_HUMAN CDK2-associated and cullin domain-containing protein 1
Q86Y56	HEATR2	0.09838	0.0028	7.04561	1	HEAT2_HUMAN HEAT repeat-containing protein 2
Q86Y82	STX12	0.03246	0.00503	21.3539	2	STX12_HUMAN Syntaxin-12
Q86YB8	ERO1LB	0.04668	0.00631	14.8489	1	ERO1B_HUMAN ERO1-like protein beta
Q86YH6	PDSS2	0.06042	0.00545	11.4721	2	DLP1_HUMAN Decaprenyl-diphosphate synthase subunit 2
Q86YP4-3	GATAD2A	0.09663	0.00368	7.17321	4	P66A_HUMAN Isoform 3 of Transcriptional repressor p66-alpha
Q8IU81	IRF2BP1	0.0618	0.00715	11.216	1	I2BP1_HUMAN Interferon regulatory factor 2-binding protein 1
Q8IUC4	RHPN2	0.16588	0.01325	4.17861	4	RHPN2_HUMAN Rhophilin-2
Q8IUD2	ERC1	0.06569	0.007	10.5518	5	RB6I2_HUMAN ELKS/Rab6-interacting/CAST family member 1
Q8IUF8	MINA	0.07707	0.00652	8.99374	3	MINA_HUMAN Bifunctional lysine-specific demethylase and histidyl-hydroxylase MINA
Q8IV36	HID1	0.07689	0.00382	9.01479	1	HID1_HUMAN Protein HID1
Q8IV48	ERI1	0.15419	0.0194	4.49541	2	ERI1_HUMAN 3'-5' exoribonuclease 1
Q8IVD9	NUDCD3	0.06383	0.00843	10.8593	1	NUDC3_HUMAN NudC domain-containing protein 3
Q8IVF5-2	TIAM2	0.13418	0.0174	5.1658	1	TIAM2_HUMAN Isoform 2 of T-lymphoma invasion and metastasis-inducing protein 2
Q8IVH2	FOXP4	0.08063	0.00916	8.59664	2	FOXP4_HUMAN Forkhead box protein P4
Q8IVT2	MISP	0.0457	0.00506	15.1673	2	MISP_HUMAN Mitotic interactor and substrate of PLK1
Q8IWC1	MAP7D3	0.07315	0.0036	9.4757	8	MA7D3_HUMAN MAP7 domain-containing protein 3
Q8IWI9-4	MGA	0.06237	0.00679	11.1135	2	MGAP_HUMAN Isoform 4 of MAX gene-associated protein
Q8IWL3	HSCB	0.04407	0.00718	15.7283	1	HSC20_HUMAN Iron-sulfur cluster co-chaperone protein HscB, mitochondrial
Q8IWR0	ZC3H7A	0.06103	0.00499	11.3575	3	Z3H7A_HUMAN Zinc finger CCCH domain-containing protein 7A
Q8IWS0	PHF6	0.05612	0.00289	12.3512	3	PHF6_HUMAN PHD finger protein 6
Q8IWU5	SULF2	0.24938	0.01673	2.77948	11	SULF2_HUMAN Extracellular sulfatase Sulf-2
Q8IWU6	SULF1	0.24733	0.01813	2.80252	2	SULF1_HUMAN Extracellular sulfatase Sulf-1
Q8IWX8	CHERP	0.11088	0.00666	6.25133	3	CHERP_HUMAN Calcium homeostasis endoplasmic reticulum protein
Q8IWZ3-6	ANKHD1	0.1238	0.00682	5.59893	3	ANKH1_HUMAN Isoform 6 of Ankyrin repeat and KH domain-containing protein 1
Q8IWZ8	SUGP1	0.06147	0.00574	11.2762	4	SUGP1_HUMAN SURP and G-patch domain-containing protein 1
Q8IX01	SUGP2	0.07635	0.00326	9.07855	4	SUGP2_HUMAN SURP and G-patch domain-containing protein 2
Q8IX18	DHX40	0.12742	0.00693	5.43986	2	DHX40_HUMAN Probable ATP-dependent RNA helicase DHX40
Q8IXB1	DNAJC10	0.05203	0.00611	13.3221	4	DJC10_HUMAN DnaJ homolog subfamily C member 10
Q8IXJ6	SIRT2	0.05585	0.00346	12.4109	1	SIR2_HUMAN NAD-dependent protein deacetylase sirtuin-2
Q8IXM3	MRPL41	0.27184	0.04392	2.54984	3	RM41_HUMAN 39S ribosomal protein L41, mitochondrial
Q8IXQ6	PARP9	0.0495	0.00458	14.003	4	PARP9_HUMAN Poly [ADP-ribose] polymerase 9
Q8IY33	MICALL2	0.06048	0.00441	11.4608	2	MILK2_HUMAN MICAL-like protein 2
Q8IY67-2	RAVER1	0.07455	0.00824	9.29775	2	RAVR1_HUMAN Isoform 2 of Ribonucleoprotein PTB-binding 1
Q8IY81	FTSJ3	0.05268	0.00477	13.1577	4	SPB1_HUMAN pre-rRNA processing protein FTSJ3
Q8IYB3	SRRM1	0.04076	0.00398	17.0056	5	SRRM1_HUMAN Serine/arginine repetitive matrix protein 1
Q8IYB5	SMAP1	0.06821	0.00462	10.162	5	SMAP1_HUMAN Stromal membrane-associated protein 1
Q8IYB5-2	SMAP1	0.05372	0.00684	12.903	1	SMAP1_HUMAN Isoform 2 of Stromal membrane-associated protein 1
Q8IYI6	EXOC8	0.05622	0.00554	12.3292	1	EXOC8_HUMAN Exocyst complex component 8
Q8IYS0	GRAMD1C	0.10384	0.00991	6.67515	1	GRM1C_HUMAN GRAM domain-containing protein 1C
Q8IYS2-2	KIAA2013	0.05895	0.00449	11.7582	1	K2013_HUMAN Isoform 2 of Uncharacterized protein KIAA2013
Q8IYU8	MICU2	0.06296	0.01133	11.0093	3	MICU2_HUMAN Calcium uptake protein 2, mitochondrial
Q8IZ81	ELMOD2	0.04492	0.00286	15.4307	2	ELMD2_HUMAN ELMO domain-containing protein 2
Q8IZH2	XRN1	0.0567	0.00599	12.2248	1	XRN1_HUMAN 5'-3' exoribonuclease 1
Q8N0U8	VKORC1L1	0.0511	0.00567	13.5645	1	VKORL_HUMAN Vitamin K epoxide reductase complex subunit 1-like protein 1
Q8N0X7	SPG20	0.07673	0.00586	9.03359	1	SPG20_HUMAN Spartin
Q8N0Y7	PGAM4	0.03908	0.01107	17.7366	2	PGAM4_HUMAN Probable phosphoglycerate mutase 4
Q8N128-2	FAM177A1	0.10156	0.00949	6.825	1	F177A_HUMAN Isoform 2 of Protein FAM177A1
Q8N163-2	CCAR2	0.05519	0.00955	12.5593	2	CCAR2_HUMAN Isoform 2 of Cell cycle and apoptosis regulator protein 2
Q8N183	NDUFAF2	0.07935	0.00648	8.73531	2	MIMIT_HUMAN Mimitin, mitochondrial
Q8N1B4	VPS52	0.19096	0.02051	3.6298	2	VPS52_HUMAN Vacuolar protein sorting-associated protein 52 homolog
Q8N1G2	CMTR1	0.08279	0.00419	8.37235	1	CMTR1_HUMAN Cap-specific mRNA (nucleoside-2'-O-)-methyltransferase 1
Q8N1G4	LRRC47	0.04496	0.00957	15.417	6	LRC47_HUMAN Leucine-rich repeat-containing protein 47
Q8N2F6	ARMC10	0.04127	0.00939	16.7954	1	ARM10_HUMAN Armadillo repeat-containing protein 10
Q8N2I9-4	STK40	0.04194	0.00606	16.5271	1	STK40_HUMAN Isoform 4 of Serine/threonine-protein kinase 40
Q8N2K0-2	ABHD12	0.07699	0.00423	9.00308	2	ABD12_HUMAN Isoform 2 of Monoacylglycerol lipase ABHD12
Q8N2W9	PIAS4	0.11796	0.00626	5.87612	2	PIAS4_HUMAN E3 SUMO-protein ligase PIAS4
Q8N335	GPD1L	0.04503	0.00354	15.393	9	GPD1L_HUMAN Glycerol-3-phosphate dehydrogenase 1-like protein
Q8N370-3	SLC43A2	0.07161	0.02426	9.67947	1	LAT4_HUMAN Isoform 3 of Large neutral amino acids transporter small subunit 4
Q8N3J9	ZNF664	0.14273	0.01158	4.85635	1	ZN664_HUMAN Zinc finger protein 664
Q8N3U4-2	STAG2	0.07518	0.00424	9.21983	2	STAG2_HUMAN Isoform 2 of Cohesin subunit SA-2
Q8N4A0	GALNT4	0.04688	0.0071	14.7856	1	GALT4_HUMAN Polypeptide N-acetylgalactosaminyltransferase 4
Q8N4S9	MARVELD2	0.08623	0.00579	8.03835	1	MALD2_HUMAN MARVEL domain-containing protein 2
Q8N4V1-2	MMGT1	0.06592	0.00987	10.515	1	MMGT1_HUMAN Isoform 2 of Membrane magnesium transporter 1
Q8N565-2	MREG	0.06784	0.00375	10.2174	3	MREG_HUMAN Isoform 2 of Melanoregulin
Q8N5C6	SRBD1	0.03146	0.00433	22.0327	1	SRBD1_HUMAN S1 RNA-binding domain-containing protein 1
Q8N5C7	DTWD1	0.04516	0.00493	15.3487	1	DTWD1_HUMAN DTW domain-containing protein 1
Q8N5F7	NKAP	0.05411	0.00407	12.81	1	NKAP_HUMAN NF-kappa-B-activating protein
Q8N5G0	SMIM20	0.05378	0.00387	12.8886	1	SMI20_HUMAN Small integral membrane protein 20
Q8N5G2	TMEM57	0.0613	0.00578	11.3075	1	MACOI_HUMAN Macoilin
Q8N5M4	TTC9C	0.05683	0.00476	12.1969	1	TTC9C_HUMAN Tetratricopeptide repeat protein 9C
Q8N5N7	MRPL50	0.18824	0.01504	3.68225	1	RM50_HUMAN 39S ribosomal protein L50, mitochondrial
Q8N5P1	ZC3H8	0.10308	0.00401	6.72436	1	ZC3H8_HUMAN Zinc finger CCCH domain-containing protein 8
Q8N684-3	CPSF7	0.05896	0.00523	11.7562	6	CPSF7_HUMAN Isoform 3 of Cleavage and polyadenylation specificity factor subunit 7
Q8N6H7	ARFGAP2	0.08619	0.01264	8.04208	5	ARFG2_HUMAN ADP-ribosylation factor GTPase-activating protein 2
Q8N6L1-2	KRTCAP2	0.11385	0.00753	6.08825	1	KTAP2_HUMAN Isoform 2 of Keratinocyte-associated protein 2
Q8N6M0	OTUD6B	0.0722	0.00404	9.60038	2	OTU6B_HUMAN OTU domain-containing protein 6B
Q8N6R0	METTL13	0.14465	0.01821	4.79189	1	MET13_HUMAN Methyltransferase-like protein 13
Q8N6T3-2	ARFGAP1	0.06993	0.00382	9.91201	2	ARFG1_HUMAN Isoform 2 of ADP-ribosylation factor GTPase-activating protein 1
Q8N766	EMC1	0.02796	0.00571	24.7907	3	EMC1_HUMAN ER membrane protein complex subunit 1
Q8N7H5	PAF1	0.08461	0.0057	8.19226	3	PAF1_HUMAN RNA polymerase II-associated factor 1 homolog
Q8N7P1	PLD5	0.06087	0.00108	11.3873	1	PLD5_HUMAN Inactive phospholipase D5
Q8N806	UBR7	0.0879	0.00838	7.88563	1	UBR7_HUMAN Putative E3 ubiquitin-protein ligase UBR7
Q8N8J7	C4orf32	0.06052	0.01045	11.4532	1	CD032_HUMAN Uncharacterized protein C4orf32
Q8N8Q9	NIPA2	0.06206	0.00703	11.169	1	NIPA2_HUMAN Magnesium transporter NIPA2
Q8N8R3	SLC25A29	0.05638	0.01024	12.2942	1	MCATL_HUMAN Mitochondrial carnitine/acylcarnitine carrier protein CACL
Q8N8S7	ENAH	0.05274	0.00818	13.1427	4	ENAH_HUMAN Protein enabled homolog
Q8N987	NECAB1	0.19131	0.02037	3.62316	1	NECA1_HUMAN N-terminal EF-hand calcium-binding protein 1
Q8N9N8	EIF1AD	0.12343	0.00864	5.61571	1	EIF1A_HUMAN Probable RNA-binding protein EIF1AD
Q8N9U0	TC2N	0.17354	0.01525	3.99416	2	TAC2N_HUMAN Tandem C2 domains nuclear protein
Q8NAV1	PRPF38A	0.11022	0.00743	6.28876	1	PR38A_HUMAN Pre-mRNA-splicing factor 38A
Q8NBJ7-3	SUMF2	0.14395	0.01082	4.81519	2	SUMF2_HUMAN Isoform 3 of Sulfatase-modifying factor 2
Q8NBL1	POGLUT1	0.09304	0.00717	7.44999	1	PGLT1_HUMAN Protein O-glucosyltransferase 1
Q8NBM4	UBAC2	0.04369	0.00635	15.8651	1	UBAC2_HUMAN Ubiquitin-associated domain-containing protein 2
Q8NBS9	TXNDC5	0.05518	0.00346	12.5616	5	TXND5_HUMAN Thioredoxin domain-containing protein 5
Q8NBU5	ATAD1	0.08454	0.00697	8.19904	2	ATAD1_HUMAN ATPase family AAA domain-containing protein 1
Q8NBX0	SCCPDH	0.02906	0.00297	23.8523	2	SCPDL_HUMAN Saccharopine dehydrogenase-like oxidoreductase
Q8NC51	SERBP1	0.09204	0.00657	7.53093	8	PAIRB_HUMAN Plasminogen activator inhibitor 1 RNA-binding protein
Q8NC54	KCT2	0.10327	0.01275	6.71199	1	KCT2_HUMAN Keratinocyte-associated transmembrane protein 2
Q8NC56	LEMD2	0.05633	0.00728	12.3051	1	LEMD2_HUMAN LEM domain-containing protein 2
Q8NC60	NOA1	0.05698	0.00336	12.1647	2	NOA1_HUMAN Nitric oxide-associated protein 1
Q8NC96	NECAP1	0.0644	0.00233	10.7632	2	NECP1_HUMAN Adaptin ear-binding coat-associated protein 1
Q8NCA5	FAM98A	0.08825	0.01206	7.85436	2	FA98A_HUMAN Protein FAM98A
Q8NCK3	ZNF485	0.07828	0.00622	8.85472	1	ZN485_HUMAN Zinc finger protein 485
Q8NCL4	GALNT6	0.06562	0.00387	10.563	2	GALT6_HUMAN Polypeptide N-acetylgalactosaminyltransferase 6
Q8NCU8	LINC00116	0.05178	0.00638	13.3864	1	YB039_HUMAN Putative uncharacterized protein encoded by LINC00116
Q8NCW5	APOA1BP	0.03419	0.00586	20.2734	3	NNRE_HUMAN NAD(P)H-hydrate epimerase
Q8ND04-2	SMG8	0.07479	0.00562	9.26791	4	SMG8_HUMAN Isoform 2 of Protein SMG8
Q8ND56-2	LSM14A	0.07792	0.01593	8.89563	3	LS14A_HUMAN Isoform 2 of Protein LSM14 homolog A
Q8NDX6	ZNF740	0.05595	0.0082	12.3887	1	ZN740_HUMAN Zinc finger protein 740
Q8NE65	ZNF738	0.08798	0.00678	7.87846	1	ZN738_HUMAN Protein ZNF738
Q8NE71	ABCF1	0.04125	0.0063	16.8036	2	ABCF1_HUMAN ATP-binding cassette sub-family F member 1
Q8NE86	MCU	0.04938	0.00625	14.037	2	MCU_HUMAN Calcium uniporter protein, mitochondrial
Q8NEF9	SRFBP1	0.09237	0.00579	7.50403	3	SRFB1_HUMAN Serum response factor-binding protein 1
Q8NEV1	CSNK2A3	0.05724	0.00492	12.1095	1	CSK23_HUMAN Casein kinase II subunit alpha 3
Q8NEY8	PPHLN1	0.06112	0.00783	11.3408	4	PPHLN_HUMAN Periphilin-1
Q8NF64	ZMIZ2	0.14331	0.0067	4.8367	1	ZMIZ2_HUMAN Zinc finger MIZ domain-containing protein 2
Q8NF91	SYNE1	0.0541	0.00818	12.8123	2	SYNE1_HUMAN Nesprin-1
Q8NFC6	BOD1L1	0.02726	0.009	25.4273	2	BD1L1_HUMAN Biorientation of chromosomes in cell division protein 1-like 1
Q8NFH5	NUP35	0.14139	0.0147	4.90238	1	NUP53_HUMAN Nucleoporin NUP53
Q8NFJ5	GPRC5A	0.06123	0.00596	11.3204	1	RAI3_HUMAN Retinoic acid-induced protein 3
Q8NFV4	ABHD11	0.08203	0.00922	8.44992	1	ABHDB_HUMAN Alpha/beta hydrolase domain-containing protein 11
Q8NFW8	CMAS	0.0502	0.00583	13.8077	1	NEUA_HUMAN N-acylneuraminate cytidylyltransferase
Q8NHH9	ATL2	0.03611	0.00643	19.1954	3	ATLA2_HUMAN Atlastin-2
Q8NHM5	KDM2B	0.06661	0.00714	10.4061	1	KDM2B_HUMAN Lysine-specific demethylase 2B
Q8NHQ9	DDX55	0.07412	0.00746	9.35169	3	DDX55_HUMAN ATP-dependent RNA helicase DDX55
Q8NHW5	RPLP0P6	0.05492	0.00341	12.621	3	RLA0L_HUMAN 60S acidic ribosomal protein P0-like
Q8NI27	THOC2	0.23636	0.01742	2.93259	2	THOC2_HUMAN THO complex subunit 2
Q8NI77	KIF18A	0.20106	0.01525	3.44746	2	KI18A_HUMAN Kinesin-like protein KIF18A
Q8TAA3	PSMA8	0.34547	0.05514	2.00639	2	PSA7L_HUMAN Proteasome subunit alpha type-7-like
Q8TAA9	VANGL1	0.09463	0.00468	7.32481	1	VANG1_HUMAN Vang-like protein 1
Q8TAQ2	SMARCC2	0.07789	0.01021	8.89905	5	SMRC2_HUMAN SWI/SNF complex subunit SMARCC2
Q8TAT6-2	NPLOC4	0.05487	0.00434	12.6325	4	NPL4_HUMAN Isoform 2 of Nuclear protein localization protein 4 homolog
Q8TB61	SLC35B2	0.03402	0.00792	20.3747	3	S35B2_HUMAN Adenosine 3'-phospho 5'-phosphosulfate transporter 1
Q8TB72	PUM2	0.05486	0.00515	12.6348	5	PUM2_HUMAN Pumilio homolog 2
Q8TBA6	GOLGA5	0.03613	0.00688	19.1848	7	GOGA5_HUMAN Golgin subfamily A member 5
Q8TBF4	ZCRB1	0.09523	0.00556	7.27866	3	ZCRB1_HUMAN Zinc finger CCHC-type and RNA-binding motif-containing protein 1
Q8TBM8	DNAJB14	0.08663	0.00541	8.00124	2	DJB14_HUMAN DnaJ homolog subfamily B member 14
Q8TBQ9	TMEM167A	0.04604	0.00689	15.0553	1	KISHA_HUMAN Protein kish-A
Q8TBX8	PIP4K2C	0.08447	0.00453	8.20584	2	PI42C_HUMAN Phosphatidylinositol 5-phosphate 4-kinase type-2 gamma
Q8TC12	RDH11	0.06192	0.00435	11.1942	5	RDH11_HUMAN Retinol dehydrogenase 11
Q8TCC3-2	MRPL30	0.12644	0.01775	5.48202	2	RM30_HUMAN Isoform 2 of 39S ribosomal protein L30, mitochondrial
Q8TCD1	C18orf32	0.06584	0.00402	10.5278	2	CR032_HUMAN UPF0729 protein C18orf32
Q8TCG1	KIAA1524	0.09709	0.00557	7.13922	1	CIP2A_HUMAN Protein CIP2A
Q8TCJ2	STT3B	0.04462	0.00953	15.5345	3	STT3B_HUMAN Dolichyl-diphosphooligosaccharide--protein glycosyltransferase subunit STT3B
Q8TCT8	SPPL2A	0.06791	0.00663	10.2068	1	SPP2A_HUMAN Signal peptide peptidase-like 2A
Q8TCT9-2	HM13	0.08793	0.00574	7.88294	2	HM13_HUMAN Isoform 2 of Minor histocompatibility antigen H13
Q8TCU6	PREX1	0.09405	0.00663	7.36999	7	PREX1_HUMAN Phosphatidylinositol 3,4,5-trisphosphate-dependent Rac exchanger 1 protein
Q8TD19	NEK9	0.04198	0.00737	16.5114	1	NEK9_HUMAN Serine/threonine-protein kinase Nek9
Q8TD30	GPT2	0.10383	0.00876	6.67579	5	ALAT2_HUMAN Alanine aminotransferase 2
Q8TDB6	DTX3L	0.05171	0.01447	13.4045	4	DTX3L_HUMAN E3 ubiquitin-protein ligase DTX3L
Q8TDD1-2	DDX54	0.04183	0.00669	16.5706	2	DDX54_HUMAN Isoform 2 of ATP-dependent RNA helicase DDX54
Q8TDW5-2	SYTL5	0.13901	0.00869	4.98631	4	SYTL5_HUMAN Isoform 2 of Synaptotagmin-like protein 5
Q8TED0	UTP15	0.10233	0.00774	6.77365	2	UTP15_HUMAN U3 small nucleolar RNA-associated protein 15 homolog
Q8TEW0	PARD3	0.06054	0.00546	11.4494	3	PARD3_HUMAN Partitioning defective 3 homolog
Q8TEX9-2	IPO4	0.06407	0.00511	10.8186	1	IPO4_HUMAN Isoform 2 of Importin-4
Q8TEY7	USP33	0.12764	0.00639	5.43049	1	UBP33_HUMAN Ubiquitin carboxyl-terminal hydrolase 33
[truncated: 972 more rows]

## Sheet: Btz-treated experiment
Table S1b - Quantifying the dynamics of 3023 proteins and their half-lives in btz-treated MCF-7 cells
Uniprot ID	Gene Symbol	Degradation rate (h-1)	Standard deviation	Half-life (h)	Unique peptide hits	Annotation
A0AV96	RBM47	0.03818	0.0065	18.1547	1	RBM47_HUMAN RNA-binding protein 47
A0AVT1	UBA6	0.05596	0.00692	12.3865	1	UBA6_HUMAN Ubiquitin-like modifier-activating enzyme 6
A0FGR8-6	ESYT2	0.02381	0.00473	29.1116	3	ESYT2_HUMAN Isoform 6 of Extended synaptotagmin-2
A1L0T0	ILVBL	0.03603	0.00594	19.2381	2	ILVBL_HUMAN Acetolactate synthase-like protein
A2A3N6	PIPSL	0.02386	0.00217	29.0506	2	PIPSL_HUMAN Putative PIP5K1A and PSMD4-like protein
A2RRP1	NBAS	0.03554	0.01063	19.5033	1	NBAS_HUMAN Neuroblastoma-amplified sequence
A3KN83	SBNO1	0.04012	0.00538	17.2768	2	SBNO1_HUMAN Protein strawberry notch homolog 1
A4D1E9	GTPBP10	0.04973	0.00603	13.9382	3	GTPBA_HUMAN GTP-binding protein 10
A5YKK6	CNOT1	0.01085	0.01056	63.8845	1	CNOT1_HUMAN CCR4-NOT transcription complex subunit 1
A6NCI4	VWA3A	0.06205	0.00741	11.1708	1	VWA3A_HUMAN von Willebrand factor A domain-containing protein 3A
A6NDG6	PGP	0.03928	0.01875	17.6463	1	PGP_HUMAN Phosphoglycolate phosphatase
A6NDU8	C5orf51	0.04804	0.00881	14.4285	1	CE051_HUMAN UPF0600 protein C5orf51
A6NIZ1		0.02078	0.00583	33.3565	3	RP1BL_HUMAN Ras-related protein Rap-1b-like protein
A8MW92	PHF20L1	0.02369	0.00639	29.2591	1	P20L1_HUMAN PHD finger protein 20-like protein 1
A8MWD9	SNRPGP15	0.05757	0.02328	12.0401	1	RUXGL_HUMAN Small nuclear ribonucleoprotein G-like protein
A9UHW6-3	MIF4GD	0.01247	0.00871	55.5852	1	MI4GD_HUMAN Isoform 3 of MIF4G domain-containing protein
B4DTU4	LIG1	0.01788	0.0039	38.7666	1	B4DTU4_HUMAN DNA ligase
B5ME19	EIF3CL	0.05852	0.01373	11.8446	3	EIFCL_HUMAN Eukaryotic translation initiation factor 3 subunit C-like protein
B7ZLX3	CLASP1	0.01774	0.01271	39.0726	1	B7ZLX3_HUMAN CLASP1 protein
E7EQ69	NAA50	0.02408	0.00851	28.7852	1	E7EQ69_HUMAN N-alpha-acetyltransferase 50
E9PN48	ARFGAP2	very slow	0.00218	>200	1	E9PN48_HUMAN ADP-ribosylation factor GTPase-activating protein 2 (Fragment)
E9PRG8	C11orf48	0.02517	0.00539	27.5386	2	E9PRG8_HUMAN Uncharacterized protein C11orf48
G3V4T6	GSTZ1	0.02534	0.00247	27.3539	2	G3V4T6_HUMAN Maleylacetoacetate isomerase
H0Y2V6	CEP170	0.0198	0.00516	35.0074	1	H0Y2V6_HUMAN Centrosomal protein of 170 kDa (Fragment)
H0YB30	PCNXL2	0.12117	0.00956	5.72045	1	H0YB30_HUMAN Pecanex-like protein 2 (Fragment)
I3L239	TRAP1	0.03938	0.00821	17.6015	1	I3L239_HUMAN Heat shock protein 75 kDa, mitochondrial (Fragment)
I3L2J0	CIC	0.00549	0.0104	126.256	1	I3L2J0_HUMAN Protein capicua homolog
J3KP28	SYTL2	0.03649	0.00589	18.9955	3	J3KP28_HUMAN Synaptotagmin-like protein 2
J3KTN0	EIF4A1	very slow	0.01299	>200	1	J3KTN0_HUMAN Eukaryotic initiation factor 4A-I (Fragment)
O00124	UBXN8	0.02603	0.00963	26.6288	1	UBXN8_HUMAN UBX domain-containing protein 8
O00139-4	KIF2A	0.026	0.007	26.6595	3	KIF2A_HUMAN Isoform 4 of Kinesin-like protein KIF2A
O00148	DDX39A	0.07367	0.00591	9.40881	1	DX39A_HUMAN ATP-dependent RNA helicase DDX39A
O00151	PDLIM1	0.0149	0.00638	46.5199	1	PDLI1_HUMAN PDZ and LIM domain protein 1
O00154	ACOT7	0.04162	0.00159	16.6542	1	BACH_HUMAN Cytosolic acyl coenzyme A thioester hydrolase
O00159	MYO1C	0.02162	0.01169	32.0605	4	MYO1C_HUMAN Unconventional myosin-Ic
O00186	STXBP3	0.0387	0.00585	17.9108	6	STXB3_HUMAN Syntaxin-binding protein 3
O00193	SMAP	0.01397	0.01433	49.6168	1	SMAP_HUMAN Small acidic protein
O00194	RAB27B	very slow	0.00846	>200	1	RB27B_HUMAN Ras-related protein Rab-27B
O00203	AP3B1	0.03448	0.00503	20.1029	3	AP3B1_HUMAN AP-3 complex subunit beta-1
O00204	SULT2B1	0.0083	0.00506	83.5117	4	ST2B1_HUMAN Sulfotransferase family cytosolic 2B member 1
O00212	RHOD	0.02934	0.00386	23.6246	1	RHOD_HUMAN Rho-related GTP-binding protein RhoD
O00231-2	PSMD11	0.06439	0.00992	10.7648	6	PSD11_HUMAN Isoform 2 of 26S proteasome non-ATPase regulatory subunit 11
O00232	PSMD12	0.09197	0.01248	7.53667	2	PSD12_HUMAN 26S proteasome non-ATPase regulatory subunit 12
O00244	ATOX1	0.02294	0.0178	30.2157	1	ATOX1_HUMAN Copper transport protein ATOX1
O00267	SUPT5H	0.06103	0.00619	11.3575	5	SPT5H_HUMAN Transcription elongation factor SPT5
O00268	TAF4	0.01618	0.00832	42.8398	1	TAF4_HUMAN Transcription initiation factor TFIID subunit 4
O00299	CLIC1	0.02681	0.01267	25.8541	1	CLIC1_HUMAN Chloride intracellular channel protein 1
O00400	SLC33A1	0.0725	0.01427	9.56065	1	ACATN_HUMAN Acetyl-coenzyme A transporter 1
O00401	WASL	0.04647	0.0075	14.916	2	WASL_HUMAN Neural Wiskott-Aldrich syndrome protein
O00410-3	IPO5	0.02775	0.01076	24.9783	4	IPO5_HUMAN Isoform 3 of Importin-5
O00422	SAP18	0.07012	0.00714	9.88516	2	SAP18_HUMAN Histone deacetylase complex subunit SAP18
O00429-6	DNM1L	0.00711	0.00459	97.4891	3	DNM1L_HUMAN Isoform 6 of Dynamin-1-like protein
O00469-2	PLOD2	0.07875	0.00882	8.80187	1	PLOD2_HUMAN Isoform 2 of Procollagen-lysine,2-oxoglutarate 5-dioxygenase 2
O00471	EXOC5	0.02531	0.00975	27.3863	3	EXOC5_HUMAN Exocyst complex component 5
O00483	NDUFA4	0.06416	0.00899	10.8034	2	NDUA4_HUMAN NADH dehydrogenase [ubiquinone] 1 alpha subcomplex subunit 4
O00487	PSMD14	0.04922	0.01633	14.0826	2	PSDE_HUMAN 26S proteasome non-ATPase regulatory subunit 14
O00505	KPNA3	very slow	0.00869	>200	1	IMA4_HUMAN Importin subunit alpha-4
O00506	STK25	0.03346	0.01186	20.7157	3	STK25_HUMAN Serine/threonine-protein kinase 25
O00515	LAD1	0.03021	0.00369	22.9443	8	LAD1_HUMAN Ladinin-1
O00541	PES1	0.0219	0.00732	31.6506	8	PESC_HUMAN Pescadillo homolog
O00560	SDCBP	0.07386	0.00543	9.38461	4	SDCB1_HUMAN Syntenin-1
O00566	MPHOSPH10	0.03052	0.00311	22.7112	1	MPP10_HUMAN U3 small nucleolar ribonucleoprotein protein MPP10
O00567	NOP56	0.09671	0.00902	7.16728	2	NOP56_HUMAN Nucleolar protein 56
O00570	SOX1	0.02672	0.00604	25.9411	3	SOX1_HUMAN Transcription factor SOX-1
O00571	DDX3X	0.03869	0.01014	17.9154	9	DDX3X_HUMAN ATP-dependent RNA helicase DDX3X
O00629	KPNA4	0.02307	0.00301	30.0454	2	IMA3_HUMAN Importin subunit alpha-3
O00743-3	PPP6C	0.04861	0.00386	14.2594	1	PPP6_HUMAN Isoform 3 of Serine/threonine-protein phosphatase 6 catalytic subunit
O00757	FBP2	very slow	0.00591	>200	1	F16P2_HUMAN Fructose-1,6-bisphosphatase isozyme 2
O00762	UBE2C	0.00686	0.00442	101.042	4	UBE2C_HUMAN Ubiquitin-conjugating enzyme E2 C
O00767	SCD	0.10315	0.01018	6.7198	5	ACOD_HUMAN Acyl-CoA desaturase
O14493	CLDN4	0.05786	0.02232	11.9797	1	CLD4_HUMAN Claudin-4
O14497	ARID1A	0.03818	0.00466	18.1547	2	ARI1A_HUMAN AT-rich interactive domain-containing protein 1A
O14524	TMEM194A	0.01189	0.00882	58.2967	1	T194A_HUMAN Transmembrane protein 194A
O14530	TXNDC9	0.03461	0.00808	20.0274	1	TXND9_HUMAN Thioredoxin domain-containing protein 9
O14548	COX7A2L	0.15155	0.00676	4.57372	2	COX7R_HUMAN Cytochrome c oxidase subunit 7A-related protein, mitochondrial
O14562	UBFD1	0.00978	0.00732	70.8739	4	UBFD1_HUMAN Ubiquitin domain-containing protein UBFD1
O14569	CYB561D2	0.03381	0.00676	20.5012	1	C56D2_HUMAN Cytochrome b561 domain-containing protein 2
O14578-4	CIT	0.02941	0.00631	23.5684	2	CTRO_HUMAN Isoform 4 of Citron Rho-interacting kinase
O14617-5	AP3D1	0.05101	0.01474	13.5885	1	AP3D1_HUMAN Isoform 5 of AP-3 complex subunit delta-1
O14641	DVL2	0.0045	0.01673	154.033	1	DVL2_HUMAN Segment polarity protein dishevelled homolog DVL-2
O14656	TOR1A	0.03416	0.00739	20.2912	3	TOR1A_HUMAN Torsin-1A
O14657	TOR1B	0.03331	0.00791	20.809	3	TOR1B_HUMAN Torsin-1B
O14662	STX16	0.09202	0.01802	7.53257	1	STX16_HUMAN Syntaxin-16
O14672	ADAM10	0.06466	0.01782	10.7199	1	ADA10_HUMAN Disintegrin and metalloproteinase domain-containing protein 10
O14683	TP53I11	0.01858	0.00983	37.3061	1	P5I11_HUMAN Tumor protein p53-inducible protein 11
O14730	RIOK3	0.12528	0.02254	5.53278	1	RIOK3_HUMAN Serine/threonine-protein kinase RIO3
O14734	ACOT8	0.01089	0.00758	63.6499	1	ACOT8_HUMAN Acyl-coenzyme A thioesterase 8
O14737	PDCD5	0.04695	0.01233	14.7635	1	PDCD5_HUMAN Programmed cell death protein 5
O14753	OVOL1	0.06641	0.005	10.4374	1	OVOL1_HUMAN Putative transcription factor Ovo-like 1
O14757	CHEK1	0.04733	0.00781	14.645	1	CHK1_HUMAN Serine/threonine-protein kinase Chk1
O14776	TCERG1	0.0527	0.02443	13.1527	1	TCRG1_HUMAN Transcription elongation regulator 1
O14777	NDC80	0.03706	0.00966	18.7034	4	NDC80_HUMAN Kinetochore protein NDC80 homolog
O14786	NRP1	0.11246	0.00838	6.1635	2	NRP1_HUMAN Neuropilin-1
O14818	PSMA7	0.21047	0.02726	3.29333	2	PSA7_HUMAN Proteasome subunit alpha type-7
O14832	PHYH	0.0839	0.00715	8.26159	4	PAHX_HUMAN Phytanoyl-CoA dioxygenase, peroxisomal
O14874	BCKDK	0.03998	0.02101	17.3373	1	BCKD_HUMAN [3-methyl-2-oxobutanoate dehydrogenase [lipoamide]] kinase, mitochondrial
O14880	MGST3	0.01875	0.00568	36.9678	1	MGST3_HUMAN Microsomal glutathione S-transferase 3
O14907	TAX1BP3	very slow	0.0033	>200	1	TX1B3_HUMAN Tax1-binding protein 3
O14908	GIPC1	0.04605	0.00402	15.0521	1	GIPC1_HUMAN PDZ domain-containing protein GIPC1
O14929	HAT1	0.05414	0.01067	12.8029	4	HAT1_HUMAN Histone acetyltransferase type B catalytic subunit
O14949	UQCRQ	0.06954	0.01397	9.9676	1	QCR8_HUMAN Cytochrome b-c1 complex subunit 8
O14964	HGS	very slow	0.0078	>200	3	HGS_HUMAN Hepatocyte growth factor-regulated tyrosine kinase substrate
O14965	AURKA	0.03809	0.00831	18.1976	4	AURKA_HUMAN Aurora kinase A
O14967	CLGN	0.04107	0.00681	16.8772	2	CLGN_HUMAN Calmegin
O14974	PPP1R12A	0.05827	0.01233	11.8954	7	MYPT1_HUMAN Protein phosphatase 1 regulatory subunit 12A
O14975	SLC27A2	0.05628	0.00873	12.316	1	S27A2_HUMAN Very long-chain acyl-CoA synthetase
O14976	GAK	0.02047	0.00354	33.8616	2	GAK_HUMAN Cyclin-G-associated kinase
O14979	HNRNPDL	0.02197	0.00628	31.5497	3	HNRDL_HUMAN Heterogeneous nuclear ribonucleoprotein D-like
O14980	XPO1	0.02296	0.00907	30.1893	5	XPO1_HUMAN Exportin-1
O15020	SPTBN2	0.03765	0.00867	18.4103	7	SPTN2_HUMAN Spectrin beta chain, non-erythrocytic 2
O15027-5	SEC16A	0.0107	0.00383	64.7801	1	SC16A_HUMAN Isoform 5 of Protein transport protein Sec16A
O15042	U2SURP	0.07848	0.01136	8.83215	3	SR140_HUMAN U2 snRNP-associated SURP motif-containing protein
O15091	KIAA0391	0.05501	0.00497	12.6004	10	MRRP3_HUMAN Mitochondrial ribonuclease P protein 3
O15119	TBX3	0.08646	0.00967	8.01697	3	TBX3_HUMAN T-box transcription factor TBX3
O15121	DEGS1	0.09176	0.00424	7.55391	1	DEGS1_HUMAN Sphingolipid delta(4)-desaturase DES1
O15143	ARPC1B	0.0431	0.01202	16.0823	2	ARC1B_HUMAN Actin-related protein 2/3 complex subunit 1B
O15144	ARPC2	0.08248	0.01346	8.40382	4	ARPC2_HUMAN Actin-related protein 2/3 complex subunit 2
O15145	ARPC3	0.01859	0.00538	37.286	2	ARPC3_HUMAN Actin-related protein 2/3 complex subunit 3
O15155	BET1	0.0343	0.0064	20.2084	2	BET1_HUMAN BET1 homolog
O15162	PLSCR1	0.06754	0.0188	10.2628	2	PLS1_HUMAN Phospholipid scramblase 1
O15164	TRIM24	0.0468	0.00945	14.8108	5	TIF1A_HUMAN Transcription intermediary factor 1-alpha
O15169	AXIN1	very slow	0.00616	>200	1	AXIN1_HUMAN Axin-1
O15173-2	PGRMC2	0.05039	0.01786	13.7556	1	PGRC2_HUMAN Isoform 2 of Membrane-associated progesterone receptor component 2
O15198	SMAD9	0.02374	0.00346	29.1974	1	SMAD9_HUMAN Mothers against decapentaplegic homolog 9
O15226-2	NKRF	very slow	0.00621	>200	2	NKRF_HUMAN Isoform 2 of NF-kappa-B-repressing factor
O15231-6	ZNF185	0.03669	0.00567	18.892	4	ZN185_HUMAN Isoform 6 of Zinc finger protein 185
O15234	CASC3	0.02742	0.01256	25.2789	1	CASC3_HUMAN Protein CASC3
O15235	MRPS12	0.09517	0.01085	7.28325	1	RT12_HUMAN 28S ribosomal protein S12, mitochondrial
O15258	RER1	0.0367	0.01611	18.8868	2	RER1_HUMAN Protein RER1
O15260	SURF4	0.03442	0.01062	20.1379	1	SURF4_HUMAN Surfeit locus protein 4
O15269	SPTLC1	0.07188	0.00659	9.64312	3	SPTC1_HUMAN Serine palmitoyltransferase 1
O15270	SPTLC2	very slow	0.01584	>200	2	SPTC2_HUMAN Serine palmitoyltransferase 2
O15297	PPM1D	0.05596	0.01159	12.3865	10	PPM1D_HUMAN Protein phosphatase 1D
O15305	PMM2	0.00788	0.00854	87.9628	4	PMM2_HUMAN Phosphomannomutase 2
O15321	TM9SF1	0.04071	0.00568	17.0265	2	TM9S1_HUMAN Transmembrane 9 superfamily member 1
O15347	HMGB3	0.00553	0.00539	125.343	8	HMGB3_HUMAN High mobility group protein B3
O15355	PPM1G	0.10543	0.01284	6.57448	3	PPM1G_HUMAN Protein phosphatase 1G
O15371	EIF3D	0.03617	0.00319	19.1636	4	EIF3D_HUMAN Eukaryotic translation initiation factor 3 subunit D
O15372	EIF3H	0.06572	0.00913	10.547	6	EIF3H_HUMAN Eukaryotic translation initiation factor 3 subunit H
O15393-2	TMPRSS2	0.09595	0.00895	7.22405	1	TMPS2_HUMAN Isoform 2 of Transmembrane protease serine 2
O15397	IPO8	0.0113	0.00258	61.3405	1	IPO8_HUMAN Importin-8
O15417	TNRC18	0.07556	0.01491	9.17347	3	TNC18_HUMAN Trinucleotide repeat-containing gene 18 protein
O15460	P4HA2	0.10041	0.00986	6.90317	1	P4HA2_HUMAN Prolyl 4-hydroxylase subunit alpha-2
O15511-2	ARPC5	0.05806	0.00873	11.9385	4	ARPC5_HUMAN Isoform 2 of Actin-related protein 2/3 complex subunit 5
O43143	DHX15	0.04545	0.00733	15.2508	3	DHX15_HUMAN Putative pre-mRNA-splicing factor ATP-dependent RNA helicase DHX15
O43148-2	RNMT	0.03704	0.00784	18.7135	2	MCES_HUMAN Isoform 2 of mRNA cap guanine-N7 methyltransferase
O43169	CYB5B	0.00487	0.01101	142.33	1	CYB5B_HUMAN Cytochrome b5 type B
O43172	PRPF4	0.02902	0.00475	23.8852	8	PRP4_HUMAN U4/U6 small nuclear ribonucleoprotein Prp4
O43175	PHGDH	0.00992	0.00846	69.8737	2	SERA_HUMAN D-3-phosphoglycerate dehydrogenase
O43181	NDUFS4	0.03946	0.00443	17.5658	3	NDUS4_HUMAN NADH dehydrogenase [ubiquinone] iron-sulfur protein 4, mitochondrial
O43242	PSMD3	0.02127	0.00346	32.588	4	PSMD3_HUMAN 26S proteasome non-ATPase regulatory subunit 3
O43252	PAPSS1	0.03174	0.01108	21.8383	1	PAPS1_HUMAN Bifunctional 3'-phosphoadenosine 5'-phosphosulfate synthase 1
O43255	SIAH2	0.03855	0.0079	17.9805	1	SIAH2_HUMAN E3 ubiquitin-protein ligase SIAH2
O43290	SART1	0.01131	0.01037	61.2862	10	SNUT1_HUMAN U4/U6.U5 tri-snRNP-associated protein 1
O43298	ZBTB43	very slow	0.01008	>200	2	ZBT43_HUMAN Zinc finger and BTB domain-containing protein 43
O43390	HNRNPR	0.03894	0.01588	17.8004	1	HNRPR_HUMAN Heterogeneous nuclear ribonucleoprotein R
O43390-2	HNRNPR	0.0401	0.01437	17.2855	13	HNRPR_HUMAN Isoform 2 of Heterogeneous nuclear ribonucleoprotein R
O43395	PRPF3	0.02644	0.00246	26.2159	5	PRPF3_HUMAN U4/U6 small nuclear ribonucleoprotein Prp3
O43396	TXNL1	very slow	0.01756	>200	1	TXNL1_HUMAN Thioredoxin-like protein 1
O43399-7	TPD52L2	0.05003	0.01009	13.8546	1	TPD54_HUMAN Isoform 7 of Tumor protein D54
O43402	EMC8	0.02493	0.00536	27.8037	1	EMC8_HUMAN ER membrane protein complex subunit 8
O43414	ERI3	0.01991	0.00335	34.814	1	ERI3_HUMAN ERI1 exoribonuclease 3
O43427	FIBP	0.05836	0.01085	11.8771	1	FIBP_HUMAN Acidic fibroblast growth factor intracellular-binding protein
O43432-3	EIF4G3	0.01465	0.00799	47.3138	2	IF4G3_HUMAN Isoform 3 of Eukaryotic translation initiation factor 4 gamma 3
O43447	PPIH	0.04022	0.00325	17.2339	2	PPIH_HUMAN Peptidyl-prolyl cis-trans isomerase H
O43482	OIP5	very slow	0.02818	>200	1	MS18B_HUMAN Protein Mis18-beta
O43488	AKR7A2	0.01081	0.0114	64.1209	1	ARK72_HUMAN Aflatoxin B1 aldehyde reductase member 2
O43491	EPB41L2	0.01222	0.03074	56.7224	1	E41L2_HUMAN Band 4.1-like protein 2
O43505	B3GNT1	0.02613	0.00531	26.5269	1	B3GN1_HUMAN N-acetyllactosaminide beta-1,3-N-acetylglucosaminyltransferase
O43524	FOXO3	0.03166	0.00569	21.8935	2	FOXO3_HUMAN Forkhead box protein O3
O43583	DENR	very slow	0.01364	>200	1	DENR_HUMAN Density-regulated protein
O43615	TIMM44	0.03715	0.01016	18.6581	5	TIM44_HUMAN Mitochondrial import inner membrane translocase subunit TIM44
O43633	CHMP2A	0.00193	0.00457	>200	2	CHM2A_HUMAN Charged multivesicular body protein 2a
O43663	PRC1	0.04859	0.01093	14.2652	7	PRC1_HUMAN Protein regulator of cytokinesis 1
O43670-4	ZNF207	0.03825	0.01059	18.1215	1	ZN207_HUMAN Isoform 4 of Zinc finger protein 207
O43674	NDUFB5	0.06618	0.00615	10.4737	2	NDUB5_HUMAN NADH dehydrogenase [ubiquinone] 1 beta subcomplex subunit 5, mitochondrial
O43681	ASNA1	0.01478	0.00652	46.8976	1	ASNA_HUMAN ATPase ASNA1
O43707	ACTN4	0.01192	0.01364	58.1499	6	ACTN4_HUMAN Alpha-actinin-4
O43709	WBSCR22	0.09993	0.01207	6.93633	1	WBS22_HUMAN Ribosome biogenesis methyltransferase WBSCR22
O43747-2	AP1G1	0.04105	0.00312	16.8854	4	AP1G1_HUMAN Isoform 2 of AP-1 complex subunit gamma-1
O43752	STX6	0.0183	0.01056	37.8769	1	STX6_HUMAN Syntaxin-6
O43768-4	ENSA	0.01788	0.00364	38.7666	6	ENSA_HUMAN Isoform 4 of Alpha-endosulfine
O43776	NARS	0.04539	0.01492	15.2709	1	SYNC_HUMAN Asparagine--tRNA ligase, cytoplasmic
O43795	MYO1B	0.02504	0.01015	27.6816	3	MYO1B_HUMAN Unconventional myosin-Ib
O43809	NUDT21	0.02009	0.0039	34.5021	3	CPSF5_HUMAN Cleavage and polyadenylation specificity factor subunit 5
O43813	LANCL1	0.03188	0.00482	21.7424	2	LANC1_HUMAN LanC-like protein 1
O43824	GTPBP6	0.03294	0.00941	21.0427	1	GTPB6_HUMAN Putative GTP-binding protein 6
O43837	IDH3B	0.06219	0.00321	11.1456	1	IDH3B_HUMAN Isocitrate dehydrogenase [NAD] subunit beta, mitochondrial
O43865	AHCYL1	0.03593	0.00974	19.2916	1	SAHH2_HUMAN Putative adenosylhomocysteinase 2
O43913	ORC5	0.04532	0.00437	15.2945	2	ORC5_HUMAN Origin recognition complex subunit 5
O43933	PEX1	0.02273	0.00595	30.4948	1	PEX1_HUMAN Peroxisome biogenesis factor 1
O60216	RAD21	0.05053	0.00787	13.7175	2	RAD21_HUMAN Double-strand-break repair protein rad21 homolog
O60238	BNIP3L	0.07092	0.00744	9.77365	2	BNI3L_HUMAN BCL2/adenovirus E1B 19 kDa protein-interacting protein 3-like
O60239	SH3BP5	0.08592	0.01919	8.06736	1	3BP5_HUMAN SH3 domain-binding protein 5
O60264	SMARCA5	0.07526	0.00542	9.21003	3	SMCA5_HUMAN SWI/SNF-related matrix-associated actin-dependent regulator of chromatin subfamily A member 5
O60306	AQR	0.10107	0.01242	6.85809	1	AQR_HUMAN Intron-binding protein aquarius
O60313-2	OPA1	0.02627	0.00402	26.3855	8	OPA1_HUMAN Isoform 2 of Dynamin-like 120 kDa protein, mitochondrial
O60341-2	KDM1A	0.05989	0.00825	11.5737	2	KDM1A_HUMAN Isoform 2 of Lysine-specific histone demethylase 1A
O60353	FZD6	0.03785	0.01055	18.313	2	FZD6_HUMAN Frizzled-6
O60493	SNX3	0.00986	0.00452	70.2989	1	SNX3_HUMAN Sorting nexin-3
O60499	STX10	0.03494	0.00827	19.8382	1	STX10_HUMAN Syntaxin-10
O60502	MGEA5	0.1227	0.01975	5.64912	1	NCOAT_HUMAN Bifunctional protein NCOAT
O60506	SYNCRIP	0.03472	0.01385	19.9639	5	HNRPQ_HUMAN Heterogeneous nuclear ribonucleoprotein Q
O60524	NEMF	0.03123	0.00815	22.1949	1	NEMF_HUMAN Nuclear export mediator factor NEMF
O60573	EIF4E2	0.04213	0.02893	16.4526	1	IF4E2_HUMAN Eukaryotic translation initiation factor 4E type 2
O60610	DIAPH1	0.01609	0.0077	43.0794	2	DIAP1_HUMAN Protein diaphanous homolog 1
O60664	PLIN3	very slow	0.00119	>200	7	PLIN3_HUMAN Perilipin-3
O60669	SLC16A7	0.05087	0.00565	13.6259	2	MOT2_HUMAN Monocarboxylate transporter 2
O60675	MAFK	0.023	0.00601	30.1368	1	MAFK_HUMAN Transcription factor MafK
O60684	KPNA6	0.01851	0.00291	37.4472	3	IMA7_HUMAN Importin subunit alpha-7
O60701	UGDH	0.04638	0.00635	14.945	12	UGDH_HUMAN UDP-glucose 6-dehydrogenase
O60716	CTNND1	0.03458	0.00705	20.0447	6	CTND1_HUMAN Catenin delta-1
O60716-3	CTNND1	very slow	0.0251	>200	1	CTND1_HUMAN Isoform 1AC of Catenin delta-1
O60749	SNX2	0.0303	0.01625	22.8761	6	SNX2_HUMAN Sorting nexin-2
O60762	DPM1	0.03803	0.01852	18.2263	3	DPM1_HUMAN Dolichol-phosphate mannosyltransferase
O60763-2	USO1	0.04278	0.00439	16.2026	1	USO1_HUMAN Isoform 2 of General vesicular transport factor p115
O60832	DKC1	0.11695	0.01515	5.92687	1	DKC1_HUMAN H/ACA ribonucleoprotein complex subunit 4
O60841	EIF5B	0.02446	0.00522	28.338	5	IF2P_HUMAN Eukaryotic translation initiation factor 5B
O60884	DNAJA2	0.01471	0.00628	47.1208	6	DNJA2_HUMAN DnaJ homolog subfamily A member 2
O60885	BRD4	0.01525	0.00571	45.4523	1	BRD4_HUMAN Bromodomain-containing protein 4
O60911	CTSV	0.1376	0.01913	5.03741	1	CATL2_HUMAN Cathepsin L2
O60925	PFDN1	0.02481	0.00908	27.9382	1	PFD1_HUMAN Prefoldin subunit 1
O75044	SRGAP2	0.01692	0.00672	40.9661	1	SRGP2_HUMAN SLIT-ROBO Rho GTPase-activating protein 2
O75112-7	LDB3	0.0238	0.0053	29.1238	1	LDB3_HUMAN Isoform 7 of LIM domain-binding protein 3
O75116	ROCK2	0.02718	0.00769	25.5021	2	ROCK2_HUMAN Rho-associated protein kinase 2
O75122	CLASP2	0.02991	0.01612	23.1744	2	CLAP2_HUMAN CLIP-associating protein 2
O75127	PTCD1	0.07258	0.005	9.55011	1	PTCD1_HUMAN Pentatricopeptide repeat-containing protein 1, mitochondrial
O75128-2	COBL	0.02681	0.00355	25.8541	2	COBL_HUMAN Isoform 2 of Protein cordon-bleu
O75131	CPNE3	0.01533	0.00777	45.2151	6	CPNE3_HUMAN Copine-3
O75146	HIP1R	0.01161	0.00893	59.7026	4	HIP1R_HUMAN Huntingtin-interacting protein 1-related protein
O75150	RNF40	0.06103	0.00639	11.3575	4	BRE1B_HUMAN E3 ubiquitin-protein ligase BRE1B
O75152	ZC3H11A	very slow	0.00771	>200	4	ZC11A_HUMAN Zinc finger CCCH domain-containing protein 11A
O75153	CLUH	0.02521	0.00967	27.4949	1	CLU_HUMAN Clustered mitochondria protein homolog
O75155	CAND2	0.00521	0.00765	133.042	1	CAND2_HUMAN Cullin-associated NEDD8-dissociated protein 2
O75165	DNAJC13	0.00699	0.00851	99.1627	1	DJC13_HUMAN DnaJ homolog subfamily C member 13
O75175	CNOT3	0.02337	0.00615	29.6597	3	CNOT3_HUMAN CCR4-NOT transcription complex subunit 3
O75179	ANKRD17	0.02617	0.00892	26.4863	2	ANR17_HUMAN Ankyrin repeat domain-containing protein 17
O75190	DNAJB6	0.06468	0.0077	10.7166	1	DNJB6_HUMAN DnaJ homolog subfamily B member 6
O75190-2	DNAJB6	0.03701	0.00565	18.7286	2	DNJB6_HUMAN Isoform B of DnaJ homolog subfamily B member 6
O75319	DUSP11	0.08549	0.00756	8.10793	1	DUS11_HUMAN RNA/RNP complex-1-interacting phosphatase
O75323	GBAS	0.00442	0.00798	156.821	4	NIPS2_HUMAN Protein NipSnap homolog 2
O75330-3	HMMR	0.04454	0.00849	15.5624	5	HMMR_HUMAN Isoform 3 of Hyaluronan mediated motility receptor
O75334	PPFIA2	0.01547	0.00725	44.8059	1	LIPA2_HUMAN Liprin-alpha-2
O75340	PDCD6	0.01385	0.00475	50.0467	1	PDCD6_HUMAN Programmed cell death protein 6
O75347	TBCA	very slow	0.01213	>200	2	TBCA_HUMAN Tubulin-specific chaperone A
O75348	ATP6V1G1	0.12644	0.01163	5.48202	1	VATG1_HUMAN V-type proton ATPase subunit G 1
O75351	VPS4B	very slow	0.00578	>200	6	VPS4B_HUMAN Vacuolar protein sorting-associated protein 4B
O75352	MPDU1	0.01668	0.0061	41.5556	2	MPU1_HUMAN Mannose-P-dolichol utilization defect 1 protein
O75362	ZNF217	0.07137	0.00262	9.71202	22	ZN217_HUMAN Zinc finger protein 217
O75368	SH3BGRL	0.0043	0.00416	161.197	2	SH3L1_HUMAN SH3 domain-binding glutamic acid-rich-like protein
O75369-8	FLNB	0.02079	0.00352	33.3404	43	FLNB_HUMAN Isoform 8 of Filamin-B
O75386	TULP3	0.02135	0.00386	32.4659	1	TULP3_HUMAN Tubby-related protein 3
O75390	CS	0.02613	0.0052	26.5269	7	CISY_HUMAN Citrate synthase, mitochondrial
O75391	SPAG7	0.01267	0.00611	54.7077	1	SPAG7_HUMAN Sperm-associated antigen 7
O75396	SEC22B	0.02593	0.00511	26.7315	2	SC22B_HUMAN Vesicle-trafficking protein SEC22b
O75400	PRPF40A	0.02991	0.00607	23.1744	10	PR40A_HUMAN Pre-mRNA-processing factor 40 homolog A
O75431	MTX2	0.04388	0.00728	15.7964	1	MTX2_HUMAN Metaxin-2
O75436	VPS26A	0.01217	0.00979	56.9554	1	VP26A_HUMAN Vacuolar protein sorting-associated protein 26A
O75438-2	NDUFB1	0.18381	0.03056	3.771	1	NDUB1_HUMAN Isoform 2 of NADH dehydrogenase [ubiquinone] 1 beta subcomplex subunit 1
O75439	PMPCB	0.0721	0.00969	9.61369	2	MPPB_HUMAN Mitochondrial-processing peptidase subunit beta
O75475	PSIP1	0.02914	0.01801	23.7868	7	PSIP1_HUMAN PC4 and SFRS1-interacting protein
O75521	ECI2	0.01954	0.00717	35.4732	1	ECI2_HUMAN Enoyl-CoA delta isomerase 2, mitochondrial
O75526	RBMXL2	very slow	0.00528	>200	1	RMXL2_HUMAN RNA-binding motif protein, X-linked-like-2
O75528	TADA3	0.05933	0.00612	11.6829	4	TADA3_HUMAN Transcriptional adapter 3
O75530-2	EED	0.07217	0.00451	9.60437	2	EED_HUMAN Isoform 2 of Polycomb protein EED
O75533	SF3B1	0.02335	0.00654	29.6851	13	SF3B1_HUMAN Splicing factor 3B subunit 1
O75534-3	CSDE1	0.04592	0.00471	15.0947	20	CSDE1_HUMAN Isoform 3 of Cold shock domain-containing protein E1
O75582	RPS6KA5	0.04859	0.00583	14.2652	2	KS6A5_HUMAN Ribosomal protein S6 kinase alpha-5
O75608	LYPLA1	0.01543	0.00595	44.922	3	LYPA1_HUMAN Acyl-protein thioesterase 1
O75616	ERAL1	0.03675	0.00496	18.8611	2	ERAL1_HUMAN GTPase Era, mitochondrial
O75643	SNRNP200	0.10057	0.0047	6.89219	13	U520_HUMAN U5 small nuclear ribonucleoprotein 200 kDa helicase
O75648	TRMU	0.00818	0.00878	84.7368	1	MTU1_HUMAN Mitochondrial tRNA-specific 2-thiouridylase 1
O75683	SURF6	very slow	0.00792	>200	3	SURF6_HUMAN Surfeit locus protein 6
O75688	PPM1B	0.01763	0.00377	39.3163	1	PPM1B_HUMAN Protein phosphatase 1B
O75691	UTP20	0.03781	0.00711	18.3324	1	UTP20_HUMAN Small subunit processome component 20 homolog
O75694	NUP155	0.04805	0.00661	14.4255	2	NU155_HUMAN Nuclear pore complex protein Nup155
O75717	WDHD1	0.01209	0.01358	57.3323	2	WDHD1_HUMAN WD repeat and HMG-box DNA-binding protein 1
O75718	CRTAP	0.10713	0.01572	6.47015	2	CRTAP_HUMAN Cartilage-associated protein
O75787	ATP6AP2	0.07602	0.00364	9.11796	3	RENR_HUMAN Renin receptor
O75792	RNASEH2A	0.0882	0.00653	7.85881	1	RNH2A_HUMAN Ribonuclease H2 subunit A
O75794	CDC123	0.00293	0.00567	>200	1	CD123_HUMAN Cell division cycle protein 123 homolog
O75815	BCAR3	0.05588	0.01239	12.4042	1	BCAR3_HUMAN Breast cancer anti-estrogen resistance protein 3
O75821	EIF3G	very slow	0.00794	>200	2	EIF3G_HUMAN Eukaryotic translation initiation factor 3 subunit G
O75822	EIF3J	0.01656	0.0075	41.8567	3	EIF3J_HUMAN Eukaryotic translation initiation factor 3 subunit J
O75832	PSMD10	very slow	0.00696	>200	1	PSD10_HUMAN 26S proteasome non-ATPase regulatory subunit 10
O75844	ZMPSTE24	0.02421	0.00802	28.6306	3	FACE1_HUMAN CAAX prenyl protease 1 homolog
O75874	IDH1	0.00865	0.00431	80.1326	8	IDHC_HUMAN Isocitrate dehydrogenase [NADP] cytoplasmic
O75879	PET112	0.00884	0.01154	78.4103	1	GATB_HUMAN Glutamyl-tRNA(Gln) amidotransferase subunit B, mitochondrial
O75880	SCO1	0.01321	0.00822	52.4714	1	SCO1_HUMAN Protein SCO1 homolog, mitochondrial
O75884	RBBP9	very slow	0.01282	>200	1	RBBP9_HUMAN Putative hydrolase RBBP9
O75909-4	CCNK	0.0585	0.009	11.8487	1	CCNK_HUMAN Isoform 4 of Cyclin-K
O75915	ARL6IP5	0.01862	0.00579	37.2259	2	PRAF3_HUMAN PRA1 family protein 3
O75925	PIAS1	0.04445	0.00502	15.5939	2	PIAS1_HUMAN E3 SUMO-protein ligase PIAS1
O75928	PIAS2	0.05829	0.00792	11.8914	1	PIAS2_HUMAN E3 SUMO-protein ligase PIAS2
O75934	BCAS2	0.11685	0.01422	5.93194	2	SPF27_HUMAN Pre-mRNA-splicing factor SPF27
O75937	DNAJC8	0.02895	0.0045	23.9429	4	DNJC8_HUMAN DnaJ homolog subfamily C member 8
O75940	SMNDC1	0.02728	0.00694	25.4086	5	SPF30_HUMAN Survival of motor neuron-related-splicing factor 30
O75947	ATP5H	0.0444	0.00598	15.6114	5	ATP5H_HUMAN ATP synthase subunit d, mitochondrial
O75955	FLOT1	0.05996	0.00838	11.5602	8	FLOT1_HUMAN Flotillin-1
O75956	CDK2AP2	0.03178	0.00571	21.8108	1	CDKA2_HUMAN Cyclin-dependent kinase 2-associated protein 2
O75964	ATP5L	0.10393	0.00589	6.66937	1	ATP5L_HUMAN ATP synthase subunit g, mitochondrial
O76003	GLRX3	0.02291	0.00721	30.2552	3	GLRX3_HUMAN Glutaredoxin-3
O76021	RSL1D1	0.00235	0.0124	>200	7	RL1D1_HUMAN Ribosomal L1 domain-containing protein 1
O76031	CLPX	0.03354	0.00314	20.6663	10	CLPX_HUMAN ATP-dependent Clp protease ATP-binding subunit clpX-like, mitochondrial
O76041-2	NEBL	0.01923	0.00433	36.0451	2	NEBL_HUMAN Isoform 2 of Nebulette
O76062	TM7SF2	0.05596	0.00415	12.3865	1	ERG24_HUMAN Delta(14)-sterol reductase
O76080	ZFAND5	0.01594	0.00334	43.4848	1	ZFAN5_HUMAN AN1-type zinc finger protein 5
O76094	SRP72	0.03316	0.00509	20.9031	8	SRP72_HUMAN Signal recognition particle subunit SRP72
O76095	JTB	0.05313	0.00809	13.0462	1	JTB_HUMAN Protein JTB
O94776	MTA2	0.06486	0.00857	10.6868	4	MTA2_HUMAN Metastasis-associated protein MTA2
O94822-3	LTN1	0.01933	0.00842	35.8586	1	LTN1_HUMAN Isoform 3 of E3 ubiquitin-protein ligase listerin
O94826	TOMM70A	0.02751	0.0068	25.1962	14	TOM70_HUMAN Mitochondrial import receptor subunit TOM70
O94855-2	SEC24D	0.08	0.01151	8.66434	3	SC24D_HUMAN Isoform 2 of Protein transport protein Sec24D
O94874	UFL1	0.02153	0.00657	32.1945	9	UFL1_HUMAN E3 UFM1-protein ligase 1
O94885	SASH1	0.04108	0.005	16.8731	1	SASH1_HUMAN SAM and SH3 domain-containing protein 1
O94887	FARP2	0.03491	0.00195	19.8553	1	FARP2_HUMAN FERM, RhoGEF and pleckstrin domain-containing protein 2
O94888	UBXN7	0.01798	0.00337	38.551	1	UBXN7_HUMAN UBX domain-containing protein 7
O94901-9	SUN1	0.16644	0.03092	4.16455	1	SUN1_HUMAN Isoform 9 of SUN domain-containing protein 1
O94905	ERLIN2	0.09959	0.01746	6.96001	1	ERLN2_HUMAN Erlin-2
O94906	PRPF6	0.08017	0.00568	8.64597	13	PRP6_HUMAN Pre-mRNA-processing factor 6
O94913	PCF11	0.04772	0.00781	14.5253	7	PCF11_HUMAN Pre-mRNA cleavage complex 2 protein Pcf11
O94925	GLS	0.03197	0.00633	21.6812	3	GLSK_HUMAN Glutaminase kidney isoform, mitochondrial
O94952	FBXO21	0.02489	0.00724	27.8484	4	FBX21_HUMAN F-box only protein 21
O94955	RHOBTB3	0.13706	0.02436	5.05725	2	RHBT3_HUMAN Rho-related BTB domain-containing protein 3
O94966-5	USP19	0.00471	0.00889	147.165	1	UBP19_HUMAN Isoform 5 of Ubiquitin carboxyl-terminal hydrolase 19
O94972	TRIM37	0.23078	0.04098	3.0035	1	TRI37_HUMAN E3 ubiquitin-protein ligase TRIM37
O94979-8	SEC31A	0.02285	0.00654	30.3347	8	SC31A_HUMAN Isoform 8 of Protein transport protein Sec31A
O95067	CCNB2	0.04375	0.00523	15.8434	2	CCNB2_HUMAN G2/mitotic-specific cyclin-B2
O95071	UBR5	0.08582	0.01726	8.07676	1	UBR5_HUMAN E3 ubiquitin-protein ligase UBR5
O95084	PRSS23	1.66776	0.7465	0.415616	1	PRS23_HUMAN Serine protease 23
O95104	SCAF4	0.04098	0.00512	16.9143	3	SFR15_HUMAN Splicing factor, arginine/serine-rich 15
O95139	NDUFB6	0.03935	0.00643	17.6149	3	NDUB6_HUMAN NADH dehydrogenase [ubiquinone] 1 beta subcomplex subunit 6
O95140	MFN2	0.01772	0.01873	39.1167	1	MFN2_HUMAN Mitofusin-2
O95166	GABARAP	0.05644	0.00417	12.2811	2	GBRAP_HUMAN Gamma-aminobutyric acid receptor-associated protein
O95169	NDUFB8	0.07978	0.00726	8.68823	1	NDUB8_HUMAN NADH dehydrogenase [ubiquinone] 1 beta subcomplex subunit 8, mitochondrial
O95182	NDUFA7	0.03377	0.00954	20.5255	2	NDUA7_HUMAN NADH dehydrogenase [ubiquinone] 1 alpha subcomplex subunit 7
O95197	RTN3	0.01864	0.00566	37.186	4	RTN3_HUMAN Reticulon-3
O95202	LETM1	0.03076	0.00559	22.534	9	LETM1_HUMAN LETM1 and EF-hand domain-containing protein 1, mitochondrial
O95208	EPN2	0.02046	0.00992	33.8782	5	EPN2_HUMAN Epsin-2
O95219	SNX4	0.0237	0.00599	29.2467	1	SNX4_HUMAN Sorting nexin-4
O95229	ZWINT	0.06334	0.01303	10.9433	1	ZWINT_HUMAN ZW10 interactor
O95232	LUC7L3	very slow	0.01423	>200	3	LC7L3_HUMAN Luc7-like protein 3
O95235	KIF20A	0.08592	0.01259	8.06736	5	KI20A_HUMAN Kinesin-like protein KIF20A
O95239	KIF4A	0.05232	0.01599	13.2482	1	KIF4A_HUMAN Chromosome-associated kinesin KIF4A
O95243	MBD4	0.08245	0.02099	8.40688	3	MBD4_HUMAN Methyl-CpG-binding domain protein 4
O95249	GOSR1	0.01898	0.00596	36.5199	2	GOSR1_HUMAN Golgi SNAP receptor complex member 1
O95251	KAT7	0.09682	0.00383	7.15913	1	KAT7_HUMAN Histone acetyltransferase KAT7
O95292	VAPB	0.01663	0.00806	41.6805	9	VAPB_HUMAN Vesicle-associated membrane protein-associated protein B/C
O95299	NDUFA10	0.09229	0.01169	7.51053	2	NDUAA_HUMAN NADH dehydrogenase [ubiquinone] 1 alpha subcomplex subunit 10, mitochondrial
O95319-3	CELF2	0.062	0.0217	11.1798	2	CELF2_HUMAN Isoform 3 of CUGBP Elav-like family member 2
O95340-2	PAPSS2	0.03554	0.00717	19.5033	3	PAPS2_HUMAN Isoform B of Bifunctional 3'-phosphoadenosine 5'-phosphosulfate synthase 2
O95347	SMC2	0.08884	0.01107	7.8022	3	SMC2_HUMAN Structural maintenance of chromosomes protein 2
O95365	ZBTB7A	very slow	0.01041	>200	3	ZBT7A_HUMAN Zinc finger and BTB domain-containing protein 7A
O95372	LYPLA2	very slow	0.00475	>200	1	LYPA2_HUMAN Acyl-protein thioesterase 2
O95373	IPO7	0.02351	0.00664	29.4831	2	IPO7_HUMAN Importin-7
O95391	SLU7	0.02553	0.00955	27.1503	3	SLU7_HUMAN Pre-mRNA-splicing factor SLU7
O95394-4	PGM3	0.04133	0.01108	16.771	3	AGM1_HUMAN Isoform 3 of Phosphoacetylglucosamine mutase
O95402	MED26	0.02823	0.01035	24.5536	1	MED26_HUMAN Mediator of RNA polymerase II transcription subunit 26
O95425	SVIL	0.01857	0.00519	37.3262	4	SVIL_HUMAN Supervillin
O95433	AHSA1	0.02782	0.00813	24.9154	6	AHSA1_HUMAN Activator of 90 kDa heat shock protein ATPase homolog 1
O95456	PSMG1	0.04179	0.01289	16.5864	1	PSMG1_HUMAN Proteasome assembly chaperone 1
O95470	SGPL1	0.02165	0.00521	32.016	5	SGPL1_HUMAN Sphingosine-1-phosphate lyase 1
O95471	CLDN7	0.02407	0.0056	28.7971	2	CLD7_HUMAN Claudin-7
O95573	ACSL3	0.0306	0.0053	22.6519	6	ACSL3_HUMAN Long-chain-fatty-acid--CoA ligase 3
O95619	YEATS4	0.01067	0.01305	64.9622	1	YETS4_HUMAN YEATS domain-containing protein 4
O95685	PPP1R3D	very slow	0.00337	>200	1	PPR3D_HUMAN Protein phosphatase 1 regulatory subunit 3D
O95714	HERC2	0.01668	0.00482	41.5556	1	HERC2_HUMAN E3 ubiquitin-protein ligase HERC2
O95716	RAB3D	0.02784	0.00675	24.8975	1	RAB3D_HUMAN Ras-related protein Rab-3D
O95747	OXSR1	0.02379	0.00665	29.1361	3	OXSR1_HUMAN Serine/threonine-protein kinase OSR1
O95758-4	PTBP3	0.03035	0.00361	22.8385	5	PTBP3_HUMAN Isoform 4 of Polypyrimidine tract-binding protein 3
O95782	AP2A1	0.01049	0.00232	66.0769	2	AP2A1_HUMAN AP-2 complex subunit alpha-1
O95785	WIZ	0.01732	0.00278	40.02	2	WIZ_HUMAN Protein Wiz
O95793	STAU1	0.00343	0.00372	>200	6	STAU1_HUMAN Double-stranded RNA-binding protein Staufen homolog 1
O95801	TTC4	0.03542	0.01187	19.5694	2	TTC4_HUMAN Tetratricopeptide repeat protein 4
O95817	BAG3	0.00753	0.00321	92.0514	3	BAG3_HUMAN BAG family molecular chaperone regulator 3
O95831	AIFM1	0.05013	0.01708	13.827	4	AIFM1_HUMAN Apoptosis-inducing factor 1, mitochondrial
O95858	TSPAN15	0.06267	0.00494	11.0603	1	TSN15_HUMAN Tetraspanin-15
O95870	ABHD16A	0.02741	0.00538	25.2881	1	ABHGA_HUMAN Abhydrolase domain-containing protein 16A
O95881	TXNDC12	0.03687	0.0053	18.7998	2	TXD12_HUMAN Thioredoxin domain-containing protein 12
O95900	TRUB2	0.12905	0.01685	5.37115	2	TRUB2_HUMAN Probable tRNA pseudouridine synthase 2
O95926	SYF2	0.07137	0.00634	9.71202	2	SYF2_HUMAN Pre-mRNA-splicing factor SYF2
O95983	MBD3	0.03191	0.00912	21.7219	2	MBD3_HUMAN Methyl-CpG-binding domain protein 3
O95994	AGR2	0.02484	0.0049	27.9045	1	AGR2_HUMAN Anterior gradient protein 2 homolog
O96000	NDUFB10	0.11593	0.01483	5.97901	4	NDUBA_HUMAN NADH dehydrogenase [ubiquinone] 1 beta subcomplex subunit 10
O96005	CLPTM1	0.02548	0.00824	27.2036	1	CLPT1_HUMAN Cleft lip and palate transmembrane protein 1
O96008	TOMM40	0.03324	0.00597	20.8528	2	TOM40_HUMAN Mitochondrial import receptor subunit TOM40 homolog
O96013	PAK4	0.02714	0.01143	25.5397	3	PAK4_HUMAN Serine/threonine-protein kinase PAK 4
O96019	ACTL6A	0.03184	0.00908	21.7697	2	ACL6A_HUMAN Actin-like protein 6A
P00156	MT-CYB	0.04845	0.00685	14.3064	1	CYB_HUMAN Cytochrome b
P00167	CYB5A	0.04343	0.01993	15.9601	2	CYB5_HUMAN Cytochrome b5
P00338-3	LDHA	0.02537	0.00827	27.3215	10	LDHA_HUMAN Isoform 3 of L-lactate dehydrogenase A chain
P00367	GLUD1	0.08266	0.01479	8.38552	6	DHE3_HUMAN Glutamate dehydrogenase 1, mitochondrial
P00374	DHFR	0.01395	0.01068	49.688	2	DYR_HUMAN Dihydrofolate reductase
P00387-3	CYB5R3	0.01404	0.0088	49.3695	3	NB5R3_HUMAN Isoform 3 of NADH-cytochrome b5 reductase 3
P00390	GSR	0.04961	0.01658	13.9719	2	GSHR_HUMAN Glutathione reductase, mitochondrial
P00491	PNP	0.07057	0.00703	9.82212	1	PNPH_HUMAN Purine nucleoside phosphorylase
P00492	HPRT1	0.00376	0.03189	184.348	1	HPRT_HUMAN Hypoxanthine-guanine phosphoribosyltransferase
P00505	GOT2	very slow	0.01864	>200	4	AATM_HUMAN Aspartate aminotransferase, mitochondrial
P00558	PGK1	0.01097	0.00379	63.1857	14	PGK1_HUMAN Phosphoglycerate kinase 1
P00568	AK1	0.00417	0.00529	166.222	2	KAD1_HUMAN Adenylate kinase isoenzyme 1
P00846	MT-ATP6	0.0454	0.00514	15.2676	1	ATP6_HUMAN ATP synthase subunit a
P00966	ASS1	0.03248	0.01101	21.3407	13	ASSY_HUMAN Argininosuccinate synthase
P00973-3	OAS1	0.00944	0.00804	73.4266	1	OAS1_HUMAN Isoform p48 of 2'-5'-oligoadenylate synthase 1
P01111	NRAS	0.0307	0.0033	22.5781	5	RASN_HUMAN GTPase NRas
P01116	KRAS	0.03017	0.00691	22.9747	2	RASK_HUMAN GTPase KRas
P02545	LMNA	0.03985	0.00358	17.3939	11	LMNA_HUMAN Prelamin-A/C
P02647	APOA1	0.01457	0.00795	47.5736	1	APOA1_HUMAN Apolipoprotein A-I
P03372	ESR1	0.13269	0.00724	5.22381	1	ESR1_HUMAN Estrogen receptor
P04040	CAT	0.07242	0.00646	9.57121	1	CATA_HUMAN Catalase
P04062	GBA	0.13286	0.00694	5.21712	2	GLCM_HUMAN Glucosylceramidase
P04075-2	ALDOA	very slow	0.03562	>200	12	ALDOA_HUMAN Isoform 2 of Fructose-bisphosphate aldolase A
P04150-3	NR3C1	very slow	0.00461	>200	3	GCR_HUMAN Isoform Alpha-2 of Glucocorticoid receptor
P04156	PRNP	0.09762	0.00604	7.10046	1	PRIO_HUMAN Major prion protein
P04181	OAT	0.02943	0.00874	23.5524	11	OAT_HUMAN Ornithine aminotransferase, mitochondrial
P04183	TK1	0.03074	0.00351	22.5487	4	KITH_HUMAN Thymidine kinase, cytosolic
P04406	GAPDH	very slow	0.00968	>200	13	G3P_HUMAN Glyceraldehyde-3-phosphate dehydrogenase
P04632	CAPNS1	0.06804	0.01267	10.1873	3	CPNS1_HUMAN Calpain small subunit 1
P04792	HSPB1	0.00409	0.00947	169.474	4	HSPB1_HUMAN Heat shock protein beta-1
P04798	CYP1A1	0.16534	0.02816	4.19225	2	CP1A1_HUMAN Cytochrome P450 1A1
P04843	RPN1	0.05894	0.00915	11.7602	14	RPN1_HUMAN Dolichyl-diphosphooligosaccharide--protein glycosyltransferase subunit 1
P04844	RPN2	0.02804	0.00436	24.7199	8	RPN2_HUMAN Dolichyl-diphosphooligosaccharide--protein glycosyltransferase subunit 2
P04899-4	GNAI2	0.05302	0.0079	13.0733	5	GNAI2_HUMAN Isoform sGi2 of Guanine nucleotide-binding protein G(i) subunit alpha-2
P04908	HIST1H2AB	0.03633	0.00838	19.0792	1	H2A1B_HUMAN Histone H2A type 1-B/E
P05023	ATP1A1	0.06068	0.00448	11.423	2	AT1A1_HUMAN Sodium/potassium-transporting ATPase subunit alpha-1
P05026	ATP1B1	0.06607	0.00819	10.4911	7	AT1B1_HUMAN Sodium/potassium-transporting ATPase subunit beta-1
P05067	APP	0.11025	0.02196	6.28705	1	A4_HUMAN Amyloid beta A4 protein
P05114	HMGN1	very slow	0.00576	>200	3	HMGN1_HUMAN Non-histone chromosomal protein HMG-14
P05141	SLC25A5	0.02117	0.00811	32.742	3	ADT2_HUMAN ADP/ATP translocase 2
P05161	ISG15	0.0369	0.00537	18.7845	2	ISG15_HUMAN Ubiquitin-like protein ISG15
P05166-2	PCCB	0.11906	0.02472	5.82183	1	PCCB_HUMAN Isoform 2 of Propionyl-CoA carboxylase beta chain, mitochondrial
P05198	EIF2S1	0.02346	0.00877	29.5459	6	IF2A_HUMAN Eukaryotic translation initiation factor 2 subunit 1
P05387	RPLP2	0.03979	0.00646	17.4201	2	RLA2_HUMAN 60S acidic ribosomal protein P2
P05388	RPLP0	0.05708	0.00582	12.1434	3	RLA0_HUMAN 60S acidic ribosomal protein P0
P05412	JUN	0.0648	0.01307	10.6967	1	JUN_HUMAN Transcription factor AP-1
P05423	POLR3D	0.02019	0.01972	34.3312	1	RPC4_HUMAN DNA-directed RNA polymerase III subunit RPC4
P05455	SSB	0.09235	0.0086	7.50565	9	LA_HUMAN Lupus La protein
P05556-3	ITGB1	0.02581	0.01033	26.8558	4	ITB1_HUMAN Isoform 3 of Integrin beta-1
P06280	GLA	0.10893	0.00812	6.36323	2	AGAL_HUMAN Alpha-galactosidase A
P06396	GSN	0.01559	0.01137	44.461	2	GELS_HUMAN Gelsolin
P06400	RB1	0.04851	0.00725	14.2887	5	RB_HUMAN Retinoblastoma-associated protein
P06493	CDK1	0.02892	0.00877	23.9677	2	CDK1_HUMAN Cyclin-dependent kinase 1
P06576	ATP5B	0.10634	0.00896	6.51822	2	ATPB_HUMAN ATP synthase subunit beta, mitochondrial
P06730-2	EIF4E	0.01486	0.00622	46.6452	7	IF4E_HUMAN Isoform 2 of Eukaryotic translation initiation factor 4E
P06733	ENO1	0.03357	0.00948	20.6478	13	ENOA_HUMAN Alpha-enolase
P06737	PYGL	0.04656	0.00738	14.8872	2	PYGL_HUMAN Glycogen phosphorylase, liver form
P06744-2	GPI	0.09737	0.01347	7.11869	6	G6PI_HUMAN Isoform 2 of Glucose-6-phosphate isomerase
P06748	NPM1	0.02731	0.00415	25.3807	11	NPM_HUMAN Nucleophosmin
P06753	TPM3	0.04526	0.00425	15.3148	2	TPM3_HUMAN Tropomyosin alpha-3 chain
P06865	HEXA	0.06227	0.00763	11.1313	1	HEXA_HUMAN Beta-hexosaminidase subunit alpha
P07099	EPHX1	0.021	0.00393	33.007	2	HYEP_HUMAN Epoxide hydrolase 1
P07108-5	DBI	very slow	0.01777	>200	1	ACBP_HUMAN Isoform 5 of Acyl-CoA-binding protein
P07237	P4HB	very slow	0.01386	>200	1	PDIA1_HUMAN Protein disulfide-isomerase
P07305	H1F0	very slow	0.00667	>200	5	H10_HUMAN Histone H1.0
P07384	CAPN1	0.03473	0.00895	19.9582	1	CAN1_HUMAN Calpain-1 catalytic subunit
P07737	PFN1	0.03247	0.01092	21.3473	4	PROF1_HUMAN Profilin-1
P07814	EPRS	0.02956	0.00835	23.4488	1	SYEP_HUMAN Bifunctional glutamate/proline--tRNA ligase
P07858	CTSB	0.02935	0.00438	23.6166	2	CATB_HUMAN Cathepsin B
P07900-2	HSP90AA1	0.04114	0.01282	16.8485	19	HS90A_HUMAN Isoform 2 of Heat shock protein HSP 90-alpha
P07948	LYN	0.03209	0.00765	21.6001	1	LYN_HUMAN Tyrosine-protein kinase Lyn
P07949	RET	0.21074	0.01572	3.28911	2	RET_HUMAN Proto-oncogene tyrosine-protein kinase receptor Ret
P07954	FH	0.05869	0.00791	11.8103	5	FUMH_HUMAN Fumarate hydratase, mitochondrial
P08047	SP1	0.04244	0.00685	16.3324	2	SP1_HUMAN Transcription factor Sp1
P08107	HSPA1A	0.04147	0.00665	16.7144	10	HSP71_HUMAN Heat shock 70 kDa protein 1A/1B
P08134	RHOC	0.02195	0.0086	31.5785	4	RHOC_HUMAN Rho-related GTP-binding protein RhoC
P08183	ABCB1	0.00734	0.00679	94.4342	1	MDR1_HUMAN Multidrug resistance protein 1
P08195-4	SLC3A2	0.05032	0.00824	13.7748	3	4F2_HUMAN Isoform 4 of 4F2 cell-surface antigen heavy chain
P08237-3	PFKM	0.03579	0.00253	19.3671	2	K6PF_HUMAN Isoform 3 of 6-phosphofructokinase, muscle type
P08238	HSP90AB1	0.01181	0.00494	58.6915	9	HS90B_HUMAN Heat shock protein HSP 90-beta
P08240	SRPR	0.01264	0.00761	54.8376	10	SRPR_HUMAN Signal recognition particle receptor subunit alpha
P08243	ASNS	0.03596	0.00294	19.2755	7	ASNS_HUMAN Asparagine synthetase [glutamine-hydrolyzing]
P08397	HMBS	0.07765	0.00929	8.92656	2	HEM3_HUMAN Porphobilinogen deaminase
P08473	MME	0.02452	0.00754	28.2686	1	NEP_HUMAN Neprilysin
P08559-4	PDHA1	0.07814	0.00304	8.87058	2	ODPA_HUMAN Isoform 4 of Pyruvate dehydrogenase E1 component subunit alpha, somatic form, mitochondrial
P08574	CYC1	0.03992	0.00458	17.3634	1	CY1_HUMAN Cytochrome c1, heme protein, mitochondrial
P08579	SNRPB2	0.11422	0.01286	6.06853	4	RU2B_HUMAN U2 small nuclear ribonucleoprotein B''
P08621	SNRNP70	0.02878	0.00529	24.0843	3	RU17_HUMAN U1 small nuclear ribonucleoprotein 70 kDa
P08631	HCK	0.01593	0.00644	43.5121	1	HCK_HUMAN Tyrosine-protein kinase HCK
P08651	NFIC	0.02489	0.01129	27.8484	1	NFIC_HUMAN Nuclear factor 1 C-type
P08754	GNAI3	0.05156	0.00983	13.4435	1	GNAI3_HUMAN Guanine nucleotide-binding protein G(k) subunit alpha
P08758	ANXA5	0.01749	0.00536	39.6311	5	ANXA5_HUMAN Annexin A5
P08865	RPSA	0.05101	0.02812	13.5885	3	RSSA_HUMAN 40S ribosomal protein SA
P08922	ROS1	0.05784	0.00375	11.9839	1	ROS1_HUMAN Proto-oncogene tyrosine-protein kinase ROS
P08962	CD63	0.04223	0.00779	16.4136	2	CD63_HUMAN CD63 antigen
P09001	MRPL3	0.14112	0.01525	4.91176	2	RM03_HUMAN 39S ribosomal protein L3, mitochondrial
P09012	SNRPA	0.05197	0.01106	13.3374	5	SNRPA_HUMAN U1 small nuclear ribonucleoprotein A
P09110	ACAA1	0.03404	0.01219	20.3627	2	THIK_HUMAN 3-ketoacyl-CoA thiolase, peroxisomal
P09132	SRP19	0.00927	0.00374	74.7732	2	SRP19_HUMAN Signal recognition particle 19 kDa protein
P09234	SNRPC	0.02092	0.00434	33.1332	1	RU1C_HUMAN U1 small nuclear ribonucleoprotein C
P09382	LGALS1	very slow	0.00576	>200	1	LEG1_HUMAN Galectin-1
P09429	HMGB1	0.01415	0.01428	48.9857	7	HMGB1_HUMAN High mobility group protein B1
P09467	FBP1	very slow	0.00565	>200	2	F16P1_HUMAN Fructose-1,6-bisphosphatase 1
P09493-8	TPM1	0.02008	0.00935	34.5193	1	TPM1_HUMAN Isoform 8 of Tropomyosin alpha-1 chain
P09493-9	TPM1	0.04547	0.01825	15.2441	4	TPM1_HUMAN Isoform 9 of Tropomyosin alpha-1 chain
P09525	ANXA4	0.01063	0.00357	65.2067	4	ANXA4_HUMAN Annexin A4
P09543	CNP	very slow	0.00625	>200	8	CN37_HUMAN 2',3'-cyclic-nucleotide 3'-phosphodiesterase
P09622	DLD	0.02614	0.00798	26.5167	6	DLDH_HUMAN Dihydrolipoyl dehydrogenase, mitochondrial
P09651	HNRNPA1	very slow	0.00855	>200	2	ROA1_HUMAN Heterogeneous nuclear ribonucleoprotein A1
P09661	SNRPA1	0.06609	0.00495	10.4879	7	RU2A_HUMAN U2 small nuclear ribonucleoprotein A'
P09669	COX6C	0.46742	0.04865	1.48292	3	COX6C_HUMAN Cytochrome c oxidase subunit 6C
P09758	TACSTD2	0.05194	0.00795	13.3452	1	TACD2_HUMAN Tumor-associated calcium signal transducer 2
P09874	PARP1	0.02098	0.00946	33.0385	8	PARP1_HUMAN Poly [ADP-ribose] polymerase 1
P09914	IFIT1	0.02484	0.00329	27.9045	1	IFIT1_HUMAN Interferon-induced protein with tetratricopeptide repeats 1
P09960	LTA4H	very slow	0.00635	>200	3	LKHA4_HUMAN Leukotriene A-4 hydrolase
P09972	ALDOC	very slow	0.03682	>200	1	ALDOC_HUMAN Fructose-bisphosphate aldolase C
P0C7P4	UQCRFS1P1	0.03826	0.01066	18.1168	2	UCRIL_HUMAN Putative cytochrome b-c1 complex subunit Rieske-like protein 1
P0C7X2	ZNF688	very slow	0.0078	>200	1	ZN688_HUMAN Zinc finger protein 688
P0CG08	GPR89B	0.03766	0.00609	18.4054	2	GPHRB_HUMAN Golgi pH regulator B
P0CG48	UBC	0.02389	0.01028	29.0141	3	UBC_HUMAN Polyubiquitin-C
P0CW22	RPS17L	0.09361	0.01627	7.40463	2	RS17L_HUMAN 40S ribosomal protein S17-like
P10155	TROVE2	0.08631	0.00895	8.0309	2	RO60_HUMAN 60 kDa SS-A/Ro ribonucleoprotein
P10301	RRAS	0.04943	0.00628	14.0228	2	RRAS_HUMAN Ras-related protein R-Ras
P10316	HLA-A	0.03153	0.01149	21.9837	1	1A69_HUMAN HLA class I histocompatibility antigen, A-69 alpha chain
P10412	HIST1H1E	very slow	0.00665	>200	2	H14_HUMAN Histone H1.4
P10599	TXN	very slow	0.00739	>200	1	THIO_HUMAN Thioredoxin
P10619	CTSA	0.08773	0.00581	7.90091	2	PPGB_HUMAN Lysosomal protective protein
P10620	MGST1	0.00945	0.00474	73.3489	1	MGST1_HUMAN Microsomal glutathione S-transferase 1
P10644	PRKAR1A	0.0485	0.00754	14.2917	4	KAP0_HUMAN cAMP-dependent protein kinase type I-alpha regulatory subunit
P10768	ESD	0.02568	0.00594	26.9917	3	ESTD_HUMAN S-formylglutathione hydrolase
P10809	HSPD1	0.01479	0.00802	46.8659	16	CH60_HUMAN 60 kDa heat shock protein, mitochondrial
P10909-2	CLU	0.10069	0.00449	6.88397	5	CLUS_HUMAN Isoform 2 of Clusterin
P11021	HSPA5	0.01801	0.00717	38.4868	16	GRP78_HUMAN 78 kDa glucose-regulated protein
P11142	HSPA8	0.04452	0.00986	15.5693	17	HSP7C_HUMAN Heat shock cognate 71 kDa protein
P11166	SLC2A1	0.03655	0.0078	18.9644	1	GTR1_HUMAN Solute carrier family 2, facilitated glucose transporter member 1
P11172	UMPS	0.04842	0.0203	14.3153	3	UMPS_HUMAN Uridine 5'-monophosphate synthase
P11177	PDHB	0.05819	0.00794	11.9118	4	ODPB_HUMAN Pyruvate dehydrogenase E1 component subunit beta, mitochondrial
P11216	PYGB	0.03303	0.00288	20.9854	1	PYGB_HUMAN Glycogen phosphorylase, brain form
P11233	RALA	0.0126	0.00995	55.0117	3	RALA_HUMAN Ras-related protein Ral-A
P11234	RALB	0.04984	0.00502	13.9074	4	RALB_HUMAN Ras-related protein Ral-B
P11310-2	ACADM	0.06062	0.00772	11.4343	1	ACADM_HUMAN Isoform 2 of Medium-chain specific acyl-CoA dehydrogenase, mitochondrial
P11387	TOP1	0.01003	0.00908	69.1074	9	TOP1_HUMAN DNA topoisomerase 1
P11388-4	TOP2A	0.0554	0.0133	12.5117	1	TOP2A_HUMAN Isoform 4 of DNA topoisomerase 2-alpha
P11413-2	G6PD	0.03427	0.00281	20.2261	7	G6PD_HUMAN Isoform Long of Glucose-6-phosphate 1-dehydrogenase
P11498	PC	0.05083	0.01172	13.6366	1	PYC_HUMAN Pyruvate carboxylase, mitochondrial
P11586	MTHFD1	0.03529	0.00319	19.6415	13	C1TC_HUMAN C-1-tetrahydrofolate synthase, cytoplasmic
P11908	PRPS2	0.02793	0.0092	24.8173	1	PRPS2_HUMAN Ribose-phosphate pyrophosphokinase 2
P11940	PABPC1	0.06148	0.00653	11.2744	9	PABP1_HUMAN Polyadenylate-binding protein 1
P12004	PCNA	0.04504	0.00882	15.3896	3	PCNA_HUMAN Proliferating cell nuclear antigen
P12081	HARS	0.0047	0.00521	147.478	6	SYHC_HUMAN Histidine--tRNA ligase, cytoplasmic
P12235	SLC25A4	0.10803	0.01016	6.41625	2	ADT1_HUMAN ADP/ATP translocase 1
P12236	SLC25A6	0.02879	0.01087	24.076	8	ADT3_HUMAN ADP/ATP translocase 3
P12268	IMPDH2	0.01398	0.00545	49.5813	2	IMDH2_HUMAN Inosine-5'-monophosphate dehydrogenase 2
P12270	TPR	0.03924	0.01363	17.6643	6	TPR_HUMAN Nucleoprotein TPR
P12429	ANXA3	0.00794	0.00689	87.2981	1	ANXA3_HUMAN Annexin A3
P12532-2	CKMT1A	0.00627	0.00745	110.55	2	KCRU_HUMAN Isoform 2 of Creatine kinase U-type, mitochondrial
P12814-4	ACTN1	0.01331	0.00857	52.0772	3	ACTN1_HUMAN Isoform 4 of Alpha-actinin-1
P12956	XRCC6	0.05258	0.00836	13.1827	12	XRCC6_HUMAN X-ray repair cross-complementing protein 6
P13010	XRCC5	0.06961	0.02049	9.95758	4	XRCC5_HUMAN X-ray repair cross-complementing protein 5
P13051	UNG	0.064	0.00437	10.8304	5	UNG_HUMAN Uracil-DNA glycosylase
P13073	COX4I1	0.08208	0.00855	8.44478	8	COX41_HUMAN Cytochrome c oxidase subunit 4 isoform 1, mitochondrial
P13284	IFI30	0.02881	0.01962	24.0593	1	GILT_HUMAN Gamma-interferon-inducible lysosomal thiol reductase
P13498	CYBA	0.10259	0.01531	6.75648	3	CY24A_HUMAN Cytochrome b-245 light chain
P13639	EEF2	0.04237	0.00584	16.3594	21	EF2_HUMAN Elongation factor 2
P13640	MT1G	0.01549	0.01814	44.748	1	MT1G_HUMAN Metallothionein-1G
P13667	PDIA4	0.00713	0.00668	97.2156	7	PDIA4_HUMAN Protein disulfide-isomerase A4
P13674	P4HA1	0.02845	0.00669	24.3637	3	P4HA1_HUMAN Prolyl 4-hydroxylase subunit alpha-1
P13693	TPT1	0.06391	0.00984	10.8457	1	TCTP_HUMAN Translationally-controlled tumor protein
P13798	APEH	0.06258	0.00837	11.0762	2	ACPH_HUMAN Acylamino-acid-releasing enzyme
P13804	ETFA	0.04764	0.00792	14.5497	5	ETFA_HUMAN Electron transfer flavoprotein subunit alpha, mitochondrial
P13929	ENO3	0.01249	0.00864	55.4962	3	ENOB_HUMAN Beta-enolase
P14317	HCLS1	very slow	0.00485	>200	1	HCLS1_HUMAN Hematopoietic lineage cell-specific protein
P14324	FDPS	0.04	0.00665	17.3287	2	FPPS_HUMAN Farnesyl pyrophosphate synthase
P14406	COX7A2	0.04327	0.01049	16.0191	1	CX7A2_HUMAN Cytochrome c oxidase subunit 7A2, mitochondrial
P14550	AKR1A1	0.01883	0.00409	36.8108	3	AK1A1_HUMAN Alcohol dehydrogenase [NADP(+)]
P14618-2	PKM	0.03439	0.01703	20.1555	13	KPYM_HUMAN Isoform M1 of Pyruvate kinase PKM
P14625	HSP90B1	0.03238	0.00938	21.4066	9	ENPL_HUMAN Endoplasmin
P14635	CCNB1	0.04572	0.00511	15.1607	3	CCNB1_HUMAN G2/mitotic-specific cyclin-B1
P14678-3	SNRPB	0.04969	0.0071	13.9494	1	RSMB_HUMAN Isoform SM-B1 of Small nuclear ribonucleoprotein-associated proteins B and B'
P14735	IDE	0.01513	0.00811	45.8128	2	IDE_HUMAN Insulin-degrading enzyme
P14866	HNRNPL	very slow	0.01299	>200	3	HNRPL_HUMAN Heterogeneous nuclear ribonucleoprotein L
P14868	DARS	0.04813	0.00819	14.4016	2	SYDC_HUMAN Aspartate--tRNA ligase, cytoplasmic
P14927	UQCRB	0.10752	0.00567	6.44668	1	QCR7_HUMAN Cytochrome b-c1 complex subunit 7
P14927-2	UQCRB	0.08817	0.00602	7.86149	4	QCR7_HUMAN Isoform 2 of Cytochrome b-c1 complex subunit 7
P15104	GLUL	0.1209	0.01807	5.73323	1	GLNA_HUMAN Glutamine synthetase
P15170-3	GSPT1	very slow	0.00943	>200	4	ERF3A_HUMAN Isoform 3 of Eukaryotic peptide chain release factor GTP-binding subunit ERF3A
P15291	B4GALT1	0.07998	0.00665	8.66651	3	B4GT1_HUMAN Beta-1,4-galactosyltransferase 1
P15311	EZR	0.01644	0.00825	42.1622	11	EZRI_HUMAN Ezrin
P15408	FOSL2	0.05011	0.00795	13.8325	2	FOSL2_HUMAN Fos-related antigen 2
P15514	AREG	0.21929	0.02768	3.16087	1	AREG_HUMAN Amphiregulin
P15559	NQO1	0.07464	0.01238	9.28654	2	NQO1_HUMAN NAD(P)H dehydrogenase [quinone] 1
P15822	HIVEP1	0.03943	0.01042	17.5792	1	ZEP1_HUMAN Zinc finger protein 40
P15880	RPS2	0.08359	0.01119	8.29223	4	RS2_HUMAN 40S ribosomal protein S2
P15923	TCF3	0.00772	0.01444	89.7859	2	TFE2_HUMAN Transcription factor E2-alpha
P15927-3	RPA2	0.01271	0.00952	54.5356	1	RFA2_HUMAN Isoform 3 of Replication protein A 32 kDa subunit
P16104	H2AFX	0.04857	0.00938	14.2711	1	H2AX_HUMAN Histone H2AX
P16152	CBR1	0.01978	0.00368	35.0428	4	CBR1_HUMAN Carbonyl reductase [NADPH] 1
P16278	GLB1	0.0794	0.01492	8.72981	1	BGAL_HUMAN Beta-galactosidase
P16333	NCK1	0.01967	0.00323	35.2388	1	NCK1_HUMAN Cytoplasmic protein NCK1
P16401	HIST1H1B	very slow	0.01732	>200	5	H15_HUMAN Histone H1.5
P16402	HIST1H1D	very slow	0.00987	>200	4	H13_HUMAN Histone H1.3
P16403	HIST1H1C	very slow	0.01273	>200	3	H12_HUMAN Histone H1.2
P16435	POR	0.02067	0.00714	33.534	3	NCPR_HUMAN NADPH--cytochrome P450 reductase
P16455	MGMT	0.00881	0.00532	78.6773	2	MGMT_HUMAN Methylated-DNA--protein-cysteine methyltransferase
P16615	ATP2A2	0.00447	0.00932	155.066	3	AT2A2_HUMAN Sarcoplasmic/endoplasmic reticulum calcium ATPase 2
P16989	YBX3	0.00315	0.02888	>200	4	YBOX3_HUMAN Y-box-binding protein 3
P17010	ZFX	0.01548	0.00581	44.7769	2	ZFX_HUMAN Zinc finger X-chromosomal protein
P17029	ZKSCAN1	0.05181	0.00696	13.3786	1	ZKSC1_HUMAN Zinc finger protein with KRAB and SCAN domains 1
P17152	TMEM11	very slow	0.0089	>200	1	TMM11_HUMAN Transmembrane protein 11, mitochondrial
P17252	PRKCA	0.01378	0.01225	50.301	3	KPCA_HUMAN Protein kinase C alpha type
P17275	JUNB	0.08865	0.0036	7.81892	6	JUNB_HUMAN Transcription factor jun-B
P17480	UBTF	0.04067	0.00235	17.0432	8	UBF1_HUMAN Nucleolar transcription factor 1
P17535	JUND	0.11129	0.00969	6.2283	3	JUND_HUMAN Transcription factor jun-D
P17568	NDUFB7	0.1382	0.02227	5.01554	2	NDUB7_HUMAN NADH dehydrogenase [ubiquinone] 1 beta subcomplex subunit 7
P17612	PRKACA	0.0281	0.00468	24.6672	3	KAPCA_HUMAN cAMP-dependent protein kinase catalytic subunit alpha
P17706	PTPN2	0.03079	0.00712	22.5121	2	PTN2_HUMAN Tyrosine-protein phosphatase non-receptor type 2
P17812	CTPS1	0.02939	0.00567	23.5845	8	PYRG1_HUMAN CTP synthase 1
P17844	DDX5	0.05691	0.00881	12.1797	14	DDX5_HUMAN Probable ATP-dependent RNA helicase DDX5
P17858	PFKL	0.06098	0.01014	11.3668	1	K6PL_HUMAN 6-phosphofructokinase, liver type
P17858-2	PFKL	0.10414	0.02346	6.65592	2	K6PL_HUMAN Isoform 2 of 6-phosphofructokinase, liver type
P17931	LGALS3	0.0445	0.0155	15.5763	1	LEG3_HUMAN Galectin-3
P17980	PSMC3	0.0747	0.01182	9.27908	2	PRS6A_HUMAN 26S protease regulatory subunit 6A
P17987	TCP1	0.02289	0.00549	30.2817	6	TCPA_HUMAN T-complex protein 1 subunit alpha
P18031	PTPN1	0.03024	0.00652	22.9215	7	PTN1_HUMAN Tyrosine-protein phosphatase non-receptor type 1
P18077	RPL35A	0.07158	0.01404	9.68353	2	RL35A_HUMAN 60S ribosomal protein L35a
P18124	RPL7	very slow	0.00258	>200	4	RL7_HUMAN 60S ribosomal protein L7
P18206	VCL	0.01894	0.00569	36.597	20	VINC_HUMAN Vinculin
P18615	NELFE	0.02595	0.00192	26.7109	5	NELFE_HUMAN Negative elongation factor E
P18621-3	RPL17	0.07254	0.01424	9.55538	1	RL17_HUMAN Isoform 3 of 60S ribosomal protein L17
P18669	PGAM1	0.0039	0.01189	177.73	2	PGAM1_HUMAN Phosphoglycerate mutase 1
P18754-2	RCC1	0.00902	0.0091	76.8456	2	RCC1_HUMAN Isoform 2 of Regulator of chromosome condensation
P18827	SDC1	0.12221	0.01529	5.67177	1	SDC1_HUMAN Syndecan-1
P18858	LIG1	0.0129	0.00489	53.7323	16	DNLI1_HUMAN DNA ligase 1
P18887	XRCC1	0.04772	0.00522	14.5253	1	XRCC1_HUMAN DNA repair protein XRCC1
P19338	NCL	very slow	0.01037	>200	19	NUCL_HUMAN Nucleolin
P19367-3	HK1	0.04099	0.00539	16.9102	6	HXK1_HUMAN Isoform 3 of Hexokinase-1
P19388	POLR2E	0.046	0.01167	15.0684	1	RPAB1_HUMAN DNA-directed RNA polymerases I, II, and III subunit RPABC1
P19404	NDUFV2	0.066	0.00841	10.5022	2	NDUV2_HUMAN NADH dehydrogenase [ubiquinone] flavoprotein 2, mitochondrial
P19525	EIF2AK2	0.01281	0.00356	54.1099	4	E2AK2_HUMAN Interferon-induced, double-stranded RNA-activated protein kinase
P19793	RXRA	0.0407	0.00251	17.0306	2	RXRA_HUMAN Retinoic acid receptor RXR-alpha
P19838-2	NFKB1	0.06603	0.01022	10.4975	4	NFKB1_HUMAN Isoform 2 of Nuclear factor NF-kappa-B p105 subunit
P20042	EIF2S2	very slow	0.01203	>200	9	IF2B_HUMAN Eukaryotic translation initiation factor 2 subunit 2
P20248	CCNA2	0.05667	0.00869	12.2313	1	CCNA2_HUMAN Cyclin-A2
P20290	BTF3	very slow	0.00896	>200	6	BTF3_HUMAN Transcription factor BTF3
P20338	RAB4A	0.01915	0.01111	36.1957	1	RAB4A_HUMAN Ras-related protein Rab-4A
P20339	RAB5A	0.04266	0.01011	16.2482	2	RAB5A_HUMAN Ras-related protein Rab-5A
P20340-2	RAB6A	0.01659	0.00617	41.781	3	RAB6A_HUMAN Isoform 2 of Ras-related protein Rab-6A
P20393	NR1D1	0.07034	0.00897	9.85424	1	NR1D1_HUMAN Nuclear receptor subfamily 1 group D member 1
P20618	PSMB1	0.52764	0.13201	1.31367	1	PSB1_HUMAN Proteasome subunit beta type-1
P20645	M6PR	0.03446	0.00968	20.1145	1	MPRD_HUMAN Cation-dependent mannose-6-phosphate receptor
P20700	LMNB1	0.07408	0.00505	9.35674	2	LMNB1_HUMAN Lamin-B1
P20839-6	IMPDH1	0.01807	0.00934	38.359	3	IMDH1_HUMAN Isoform 6 of Inosine-5'-monophosphate dehydrogenase 1
P20962	PTMS	very slow	0.01412	>200	1	PTMS_HUMAN Parathymosin
P21127	CDK11B	0.04524	0.01603	15.3216	1	CD11B_HUMAN Cyclin-dependent kinase 11B
P21266	GSTM3	0.04308	0.01156	16.0898	6	GSTM3_HUMAN Glutathione S-transferase Mu 3
P21281	ATP6V1B2	0.03062	0.00534	22.6371	1	VATB2_HUMAN V-type proton ATPase subunit B, brain isoform
P21283	ATP6V1C1	0.04913	0.009	14.1084	9	VATC1_HUMAN V-type proton ATPase subunit C 1
P21291	CSRP1	0.02698	0.00358	25.6911	7	CSRP1_HUMAN Cysteine and glycine-rich protein 1
P21333	FLNA	0.02043	0.00694	33.9279	30	FLNA_HUMAN Filamin-A
P21399	ACO1	0.02392	0.00559	28.9777	2	ACOC_HUMAN Cytoplasmic aconitate hydratase
P21580	TNFAIP3	0.0688	0.01541	10.0748	1	TNAP3_HUMAN Tumor necrosis factor alpha-induced protein 3
P21781	FGF7	0.0426	0.0079	16.2711	1	FGF7_HUMAN Fibroblast growth factor 7
P21796	VDAC1	0.02959	0.0053	23.425	7	VDAC1_HUMAN Voltage-dependent anion-selective channel protein 1
P21860	ERBB3	0.12979	0.01828	5.34053	1	ERBB3_HUMAN Receptor tyrosine-protein kinase erbB-3
P21912	SDHB	0.03081	0.00662	22.4975	5	DHSB_HUMAN Succinate dehydrogenase [ubiquinone] iron-sulfur subunit, mitochondrial
P21926	CD9	very slow	0.01396	>200	5	CD9_HUMAN CD9 antigen
P22059	OSBP	0.01498	0.00353	46.2715	1	OSBP1_HUMAN Oxysterol-binding protein 1
P22061	PCMT1	0.05474	0.01844	12.6625	1	PIMT_HUMAN Protein-L-isoaspartate(D-aspartate) O-methyltransferase
P22061-2	PCMT1	0.05062	0.02738	13.6931	2	PIMT_HUMAN Isoform 2 of Protein-L-isoaspartate(D-aspartate) O-methyltransferase
P22087	FBL	0.07851	0.00609	8.82878	2	FBRL_HUMAN rRNA 2'-O-methyltransferase fibrillarin
P22234	PAICS	very slow	0.02518	>200	1	PUR6_HUMAN Multifunctional protein ADE2
P22234-2	PAICS	very slow	0.01491	>200	7	PUR6_HUMAN Isoform 2 of Multifunctional protein ADE2
P22307	SCP2	very slow	0.00959	>200	5	NLTP_HUMAN Non-specific lipid-transfer protein
P22314	UBA1	0.0229	0.00416	30.2684	5	UBA1_HUMAN Ubiquitin-like modifier-activating enzyme 1
P22392-2	NME2	0.00723	0.02901	95.871	6	NDKB_HUMAN Isoform 3 of Nucleoside diphosphate kinase B
P22626	HNRNPA2B1	0.02627	0.02509	26.3855	5	ROA2_HUMAN Heterogeneous nuclear ribonucleoproteins A2/B1
P22670	RFX1	0.02967	0.00469	23.3619	1	RFX1_HUMAN MHC class II regulatory factor RFX1
P22694-2	PRKACB	0.04053	0.00776	17.1021	3	KAPCB_HUMAN Isoform 2 of cAMP-dependent protein kinase catalytic subunit beta
P22695	UQCRC2	0.04012	0.00214	17.2768	6	QCR2_HUMAN Cytochrome b-c1 complex subunit 2, mitochondrial
P23025	XPA	0.07686	0.02215	9.01831	1	XPA_HUMAN DNA repair protein complementing XP-A cells
P23246	SFPQ	0.02672	0.01103	25.9411	10	SFPQ_HUMAN Splicing factor, proline- and glutamine-rich
P23284	PPIB	0.03955	0.01548	17.5258	8	PPIB_HUMAN Peptidyl-prolyl cis-trans isomerase B
P23381	WARS	0.00851	0.00721	81.4509	4	SYWC_HUMAN Tryptophan--tRNA ligase, cytoplasmic
P23396	RPS3	0.03255	0.0065	21.2948	1	RS3_HUMAN 40S ribosomal protein S3
P23396-2	RPS3	0.03596	0.00775	19.2755	4	RS3_HUMAN Isoform 2 of 40S ribosomal protein S3
P23443	RPS6KB1	0.02564	0.00618	27.0338	6	KS6B1_HUMAN Ribosomal protein S6 kinase beta-1
P23458	JAK1	0.10071	0.01049	6.88261	4	JAK1_HUMAN Tyrosine-protein kinase JAK1
P23497	SP100	0.04952	0.01757	13.9973	6	SP100_HUMAN Nuclear autoantigen Sp-100
P23526	AHCY	0.06749	0.01183	10.2704	1	SAHH_HUMAN Adenosylhomocysteinase
P23528	CFL1	0.03248	0.00738	21.3407	12	COF1_HUMAN Cofilin-1
P23588	EIF4B	0.04262	0.00634	16.2634	5	IF4B_HUMAN Eukaryotic translation initiation factor 4B
P23771-2	GATA3	0.07164	0.00681	9.67542	1	GATA3_HUMAN Isoform 2 of Trans-acting T-cell-specific transcription factor GATA-3
P23786	CPT2	0.03454	0.01887	20.068	3	CPT2_HUMAN Carnitine O-palmitoyltransferase 2, mitochondrial
P23919	DTYMK	0.00491	0.0033	141.171	1	KTHY_HUMAN Thymidylate kinase
P23921	RRM1	0.09507	0.01623	7.29091	3	RIR1_HUMAN Ribonucleoside-diphosphate reductase large subunit
P24390	KDELR1	0.06219	0.00911	11.1456	1	ERD21_HUMAN ER lumen protein retaining receptor 1
P24534	EEF1B2	0.0047	0.00574	147.478	4	EF1B_HUMAN Elongation factor 1-beta
P24539	ATP5F1	0.02439	0.00686	28.4193	6	AT5F1_HUMAN ATP synthase F(0) complex subunit B1, mitochondrial
P24666	ACP1	very slow	0.00341	>200	1	PPAC_HUMAN Low molecular weight phosphotyrosine protein phosphatase
P24752	ACAT1	0.07096	0.00947	9.76814	4	THIL_HUMAN Acetyl-CoA acetyltransferase, mitochondrial
P24941	CDK2	0.02647	0.01689	26.1861	3	CDK2_HUMAN Cyclin-dependent kinase 2
P25098	ADRBK1	0.04455	0.00221	15.5589	1	ARBK1_HUMAN Beta-adrenergic receptor kinase 1
P25205	MCM3	0.06434	0.00824	10.7732	4	MCM3_HUMAN DNA replication licensing factor MCM3
P25398	RPS12	0.02825	0.00511	24.5362	2	RS12_HUMAN 40S ribosomal protein S12
P25440-2	BRD2	0.07096	0.00356	9.76814	2	BRD2_HUMAN Isoform 2 of Bromodomain-containing protein 2
P25490	YY1	0.04072	0.00519	17.0223	3	TYY1_HUMAN Transcriptional repressor protein YY1
P25685	DNAJB1	0.00126	0.00561	>200	7	DNJB1_HUMAN DnaJ homolog subfamily B member 1
P25705	ATP5A1	0.04542	0.00701	15.2608	10	ATPA_HUMAN ATP synthase subunit alpha, mitochondrial
P25786-2	PSMA1	0.31974	0.06022	2.16785	1	PSA1_HUMAN Isoform Long of Proteasome subunit alpha type-1
P25787	PSMA2	0.33116	0.06718	2.09309	1	PSA2_HUMAN Proteasome subunit alpha type-2
P25788	PSMA3	0.20286	0.03591	3.41687	4	PSA3_HUMAN Proteasome subunit alpha type-3
P25789	PSMA4	0.25799	0.04474	2.68672	4	PSA4_HUMAN Proteasome subunit alpha type-4
P26196	DDX6	0.05793	0.02057	11.9653	6	DDX6_HUMAN Probable ATP-dependent RNA helicase DDX6
P26232	CTNNA2	0.04009	0.00708	17.2898	7	CTNA2_HUMAN Catenin alpha-2
P26358-2	DNMT1	0.03074	0.0094	22.5487	4	DNMT1_HUMAN Isoform 2 of DNA (cytosine-5)-methyltransferase 1
P26368	U2AF2	0.05575	0.00978	12.4331	7	U2AF2_HUMAN Splicing factor U2AF 65 kDa subunit
P26373	RPL13	0.06824	0.01074	10.1575	3	RL13_HUMAN 60S ribosomal protein L13
P26440	IVD	0.10023	0.02541	6.91557	4	IVD_HUMAN Isovaleryl-CoA dehydrogenase, mitochondrial
P26583	HMGB2	0.01641	0.00927	42.2393	8	HMGB2_HUMAN High mobility group protein B2
P26599-3	PTBP1	0.04829	0.02291	14.3538	7	PTBP1_HUMAN Isoform 3 of Polypyrimidine tract-binding protein 1
P26639-2	TARS	0.03405	0.01022	20.3567	1	SYTC_HUMAN Isoform 2 of Threonine--tRNA ligase, cytoplasmic
P26640	VARS	0.03831	0.00562	18.0931	6	SYVC_HUMAN Valine--tRNA ligase
P26641	EEF1G	0.0645	0.01939	10.7465	7	EF1G_HUMAN Elongation factor 1-gamma
P27105	STOM	0.04751	0.00293	14.5895	3	STOM_HUMAN Erythrocyte band 7 integral membrane protein
P27144	AK4	0.0213	0.005	32.5421	1	KAD4_HUMAN Adenylate kinase 4, mitochondrial
P27348	YWHAQ	0.01473	0.00849	47.0568	2	1433T_HUMAN 14-3-3 protein theta
P27361	MAPK3	0.01452	0.00559	47.7374	1	MK03_HUMAN Mitogen-activated protein kinase 3
P27448	MARK3	very slow	0.01699	>200	1	MARK3_HUMAN MAP/microtubule affinity-regulating kinase 3
P27448-7	MARK3	0.03331	0.00343	20.809	1	MARK3_HUMAN Isoform 6 of MAP/microtubule affinity-regulating kinase 3
P27635	RPL10	0.067	0.0058	10.3455	4	RL10_HUMAN 60S ribosomal protein L10
P27694	RPA1	0.05228	0.00396	13.2584	8	RFA1_HUMAN Replication protein A 70 kDa DNA-binding subunit
P27695	APEX1	very slow	0.00671	>200	6	APEX1_HUMAN DNA-(apurinic or apyrimidinic site) lyase
P27797	CALR	0.01218	0.02158	56.9086	3	CALR_HUMAN Calreticulin
P27816	MAP4	0.0294	0.0043	23.5764	8	MAP4_HUMAN Microtubule-associated protein 4
P27824	CANX	0.03016	0.01338	22.9823	7	CALX_HUMAN Calnexin
P28066	PSMA5	0.03625	0.00921	19.1213	3	PSA5_HUMAN Proteasome subunit alpha type-5
P28288	ABCD3	0.02746	0.00703	25.2421	2	ABCD3_HUMAN ATP-binding cassette sub-family D member 3
P28324	ELK4	0.057	0.01651	12.1605	1	ELK4_HUMAN ETS domain-containing protein Elk-4
P28340	POLD1	0.0537	0.00774	12.9078	1	DPOD1_HUMAN DNA polymerase delta catalytic subunit
P28347	TEAD1	0.01251	0.00488	55.4074	1	TEAD1_HUMAN Transcriptional enhancer factor TEF-1
P28360	MSX1	0.16481	0.0183	4.20573	1	MSX1_HUMAN Homeobox protein MSX-1
P28482	MAPK1	0.05072	0.02039	13.6662	1	MK01_HUMAN Mitogen-activated protein kinase 1
P28676	GCA	0.01777	0.00584	39.0066	1	GRAN_HUMAN Grancalcin
P28702-3	RXRB	0.00808	0.00994	85.7855	2	RXRB_HUMAN Isoform 2 of Retinoic acid receptor RXR-beta
P28838	LAP3	0.0259	0.00578	26.7624	8	AMPL_HUMAN Cytosol aminopeptidase
P29084	GTF2E2	0.0283	0.00354	24.4928	5	T2EB_HUMAN Transcription initiation factor IIE subunit beta
P29144	TPP2	0.01037	0.00627	66.8416	1	TPP2_HUMAN Tripeptidyl-peptidase 2
P29317	EPHA2	0.07787	0.0056	8.90134	3	EPHA2_HUMAN Ephrin type-A receptor 2
P29372	MPG	0.02617	0.00189	26.4863	2	3MG_HUMAN DNA-3-methyladenine glycosylase
P29373	CRABP2	very slow	0.01002	>200	2	RABP2_HUMAN Cellular retinoic acid-binding protein 2
P29401-2	TKT	0.05741	0.01147	12.0736	6	TKT_HUMAN Isoform 2 of Transketolase
P29692-2	EEF1D	0.01681	0.01167	41.2342	3	EF1D_HUMAN Isoform 2 of Elongation factor 1-delta
P29992	GNA11	0.04218	0.00672	16.4331	2	GNA11_HUMAN Guanine nucleotide-binding protein subunit alpha-11
P30038	ALDH4A1	0.03478	0.00677	19.9295	7	AL4A1_HUMAN Delta-1-pyrroline-5-carboxylate dehydrogenase, mitochondrial
P30040	ERP29	0.00849	0.01162	81.6428	8	ERP29_HUMAN Endoplasmic reticulum resident protein 29
P30041	PRDX6	0.00712	0.00494	97.3521	4	PRDX6_HUMAN Peroxiredoxin-6
P30042	C21orf33	0.03809	0.01495	18.1976	5	ES1_HUMAN ES1 protein homolog, mitochondrial
P30043	BLVRB	0.01379	0.00478	50.2645	2	BLVRB_HUMAN Flavin reductase (NADPH)
P30044	PRDX5	very slow	0.00487	>200	2	PRDX5_HUMAN Peroxiredoxin-5, mitochondrial
P30048	PRDX3	very slow	0.0151	>200	2	PRDX3_HUMAN Thioredoxin-dependent peroxide reductase, mitochondrial
P30050	RPL12	0.15026	0.01552	4.61299	6	RL12_HUMAN 60S ribosomal protein L12
P30084	ECHS1	0.03229	0.01232	21.4663	7	ECHM_HUMAN Enoyl-CoA hydratase, mitochondrial
P30085	CMPK1	very slow	0.0089	>200	1	KCY_HUMAN UMP-CMP kinase
P30086	PEBP1	very slow	0.02287	>200	5	PEBP1_HUMAN Phosphatidylethanolamine-binding protein 1
P30101	PDIA3	0.01902	0.00641	36.4431	12	PDIA3_HUMAN Protein disulfide-isomerase A3
P30153	PPP2R1A	0.03337	0.00568	20.7716	7	2AAA_HUMAN Serine/threonine-protein phosphatase 2A 65 kDa regulatory subunit A alpha isoform
P30281	CCND3	0.03919	0.00447	17.6868	1	CCND3_HUMAN G1/S-specific cyclin-D3
P30405	PPIF	0.01576	0.00957	43.9814	3	PPIF_HUMAN Peptidyl-prolyl cis-trans isomerase F, mitochondrial
P30419	NMT1	0.01981	0.00713	34.9898	2	NMT1_HUMAN Glycylpeptide N-tetradecanoyltransferase 1
P30519	HMOX2	0.00832	0.0286	83.311	2	HMOX2_HUMAN Heme oxygenase 2
P30520	ADSS	very slow	0.00559	>200	2	PURA2_HUMAN Adenylosuccinate synthetase isozyme 2
P30536	TSPO	0.0095	0.0089	72.9629	1	TSPOA_HUMAN Translocator protein
P30613	PKLR	0.02017	0.00963	34.3653	1	KPYR_HUMAN Pyruvate kinase PKLR
P30626	SRI	very slow	0.00236	>200	2	SORCN_HUMAN Sorcin
P30740	SERPINB1	0.01474	0.00339	47.0249	2	ILEU_HUMAN Leukocyte elastase inhibitor
P30876	POLR2B	0.04361	0.01904	15.8942	1	RPB2_HUMAN DNA-directed RNA polymerase II subunit RPB2
P31040	SDHA	0.11699	0.00825	5.92484	2	DHSA_HUMAN Succinate dehydrogenase [ubiquinone] flavoprotein subunit, mitochondrial
P31150	GDI1	0.01256	0.00661	55.1869	5	GDIA_HUMAN Rab GDP dissociation inhibitor alpha
P31153	MAT2A	0.01908	0.02251	36.3285	5	METK2_HUMAN S-adenosylmethionine synthase isoform type-2
P31350-2	RRM2	0.03293	0.00679	21.0491	3	RIR2_HUMAN Isoform 2 of Ribonucleoside-diphosphate reductase subunit M2
P31431	SDC4	0.20949	0.01113	3.30874	1	SDC4_HUMAN Syndecan-4
P31483	TIA1	0.01877	0.00303	36.9285	1	TIA1_HUMAN Nucleolysin TIA-1 isoform p40
P31689	DNAJA1	0.02706	0.00251	25.6152	9	DNJA1_HUMAN DnaJ homolog subfamily A member 1
P31749	AKT1	0.04394	0.00758	15.7749	4	AKT1_HUMAN RAC-alpha serine/threonine-protein kinase
P31751	AKT2	0.04049	0.00667	17.119	5	AKT2_HUMAN RAC-beta serine/threonine-protein kinase
P31930	UQCRC1	0.04338	0.01122	15.9785	1	QCR1_HUMAN Cytochrome b-c1 complex subunit 1, mitochondrial
P31937	HIBADH	0.03701	0.00656	18.7286	1	3HIDH_HUMAN 3-hydroxyisobutyrate dehydrogenase, mitochondrial
P31939	ATIC	0.02063	0.00483	33.599	7	PUR9_HUMAN Bifunctional purine biosynthesis protein PURH
P31946	YWHAB	0.03477	0.00548	19.9352	3	1433B_HUMAN 14-3-3 protein beta/alpha
P31947	SFN	0.00347	0.0074	199.754	2	1433S_HUMAN 14-3-3 protein sigma
P31948	STIP1	0.0184	0.01078	37.671	18	STIP1_HUMAN Stress-induced-phosphoprotein 1
P31949	S100A11	0.00218	0.00615	>200	3	S10AB_HUMAN Protein S100-A11
P32119	PRDX2	very slow	0.01232	>200	2	PRDX2_HUMAN Peroxiredoxin-2
P32321-2	DCTD	very slow	0.00787	>200	1	DCTD_HUMAN Isoform 2 of Deoxycytidylate deaminase
P32969	RPL9	0.04219	0.01279	16.4292	2	RL9_HUMAN 60S ribosomal protein L9
P33176	KIF5B	0.00356	0.00561	194.704	9	KINH_HUMAN Kinesin-1 heavy chain
P33552	CKS2	0.12017	0.02352	5.76806	1	CKS2_HUMAN Cyclin-dependent kinases regulatory subunit 2
P33908	MAN1A1	0.09575	0.00892	7.23914	1	MA1A1_HUMAN Mannosyl-oligosaccharide 1,2-alpha-mannosidase IA
P33947	KDELR2	0.06146	0.0072	11.278	2	ERD22_HUMAN ER lumen protein retaining receptor 2
P33981	TTK	very slow	0.0159	>200	3	TTK_HUMAN Dual specificity protein kinase TTK
P33991	MCM4	0.07868	0.00827	8.8097	6	MCM4_HUMAN DNA replication licensing factor MCM4
P33992	MCM5	0.05704	0.01331	12.1519	10	MCM5_HUMAN DNA replication licensing factor MCM5
P33993	MCM7	0.11332	0.01192	6.11672	3	MCM7_HUMAN DNA replication licensing factor MCM7
P34897	SHMT2	0.03498	0.01133	19.8155	3	GLYM_HUMAN Serine hydroxymethyltransferase, mitochondrial
P34932	HSPA4	0.0228	0.00335	30.4012	1	HSP74_HUMAN Heat shock 70 kDa protein 4
P35080	PFN2	0.04594	0.01353	15.0881	1	PROF2_HUMAN Profilin-2
P35080-2	PFN2	0.03842	0.00425	18.0413	1	PROF2_HUMAN Isoform IIb of Profilin-2
P35221-2	CTNNA1	0.03369	0.00268	20.5743	16	CTNA1_HUMAN Isoform 2 of Catenin alpha-1
P35226	BMI1	very slow	0.00582	>200	1	BMI1_HUMAN Polycomb complex protein BMI-1
P35227	PCGF2	very slow	0.00399	>200	1	PCGF2_HUMAN Polycomb group RING finger protein 2
P35232	PHB	0.06698	0.01125	10.3486	1	PHB_HUMAN Prohibitin
P35237	SERPINB6	0.02143	0.00643	32.3447	1	SPB6_HUMAN Serpin B6
P35240-2	NF2	0.02306	0.00436	30.0584	1	MERL_HUMAN Isoform 2 of Merlin
P35241-5	RDX	0.02962	0.00687	23.4013	10	RADI_HUMAN Isoform 5 of Radixin
P35249	RFC4	0.01574	0.00499	44.0373	2	RFC4_HUMAN Replication factor C subunit 4
P35250	RFC2	0.0383	0.00563	18.0978	1	RFC2_HUMAN Replication factor C subunit 2
P35251	RFC1	0.0143	0.00273	48.4718	2	RFC1_HUMAN Replication factor C subunit 1
P35268	RPL22	0.10939	0.00997	6.33648	1	RL22_HUMAN 60S ribosomal protein L22
P35269	GTF2F1	0.02233	0.00315	31.0411	3	T2FA_HUMAN General transcription factor IIF subunit 1
P35579	MYH9	0.09172	0.02401	7.55721	18	MYH9_HUMAN Myosin-9
P35606	COPB2	0.03511	0.00492	19.7422	11	COPB2_HUMAN Coatomer subunit beta'
P35610	SOAT1	0.01927	0.011	35.9703	1	SOAT1_HUMAN Sterol O-acyltransferase 1
P35637	FUS	0.02192	0.00746	31.6217	4	FUS_HUMAN RNA-binding protein FUS
P35658-5	NUP214	0.01542	0.00543	44.9512	1	NU214_HUMAN Isoform 5 of Nuclear pore complex protein Nup214
P35659	DEK	0.01819	0.00494	38.1059	7	DEK_HUMAN Protein DEK
P35712	SOX6	0.06959	0.00615	9.96044	1	SOX6_HUMAN Transcription factor SOX-6
P35716	SOX11	very slow	0.01123	>200	1	SOX11_HUMAN Transcription factor SOX-11
P35749-2	MYH11	0.09343	0.02301	7.41889	2	MYH11_HUMAN Isoform 2 of Myosin-11
P35813-3	PPM1A	very slow	0.00695	>200	1	PPM1A_HUMAN Isoform 3 of Protein phosphatase 1A
P35869	AHR	0.09462	0.02125	7.32559	1	AHR_HUMAN Aryl hydrocarbon receptor
P35914	HMGCL	0.02747	0.00812	25.2329	2	HMGCL_HUMAN Hydroxymethylglutaryl-CoA lyase, mitochondrial
P35998	PSMC2	0.07005	0.00982	9.89503	8	PRS7_HUMAN 26S protease regulatory subunit 7
P36405	ARL3	very slow	0.00541	>200	2	ARL3_HUMAN ADP-ribosylation factor-like protein 3
P36507	MAP2K2	0.04753	0.00864	14.5834	3	MP2K2_HUMAN Dual specificity mitogen-activated protein kinase kinase 2
P36542	ATP5C1	0.10221	0.00856	6.7816	4	ATPG_HUMAN ATP synthase subunit gamma, mitochondrial
P36543	ATP6V1E1	0.01741	0.0088	39.8132	5	VATE1_HUMAN V-type proton ATPase subunit E 1
P36578	RPL4	very slow	0.00706	>200	3	RL4_HUMAN 60S ribosomal protein L4
P36776	LONP1	0.08013	0.01837	8.65028	7	LONM_HUMAN Lon protease homolog, mitochondrial
P36957	DLST	0.02102	0.00866	32.9756	5	ODO2_HUMAN Dihydrolipoyllysine-residue succinyltransferase component of 2-oxoglutarate dehydrogenase complex, mitochondrial
P36969	GPX4	0.03562	0.0047	19.4595	2	GPX4_HUMAN Phospholipid hydroperoxide glutathione peroxidase, mitochondrial
P37108	SRP14	0.04737	0.00617	14.6326	4	SRP14_HUMAN Signal recognition particle 14 kDa protein
P37198	NUP62	0.02944	0.00712	23.5444	1	NUP62_HUMAN Nuclear pore glycoprotein p62
P37268	FDFT1	0.06401	0.01452	10.8287	1	FDFT_HUMAN Squalene synthase
P37802	TAGLN2	0.06245	0.00908	11.0992	1	TAGL2_HUMAN Transgelin-2
P37837	TALDO1	0.03946	0.00453	17.5658	10	TALDO_HUMAN Transaldolase
P38117	ETFB	0.04839	0.00374	14.3242	2	ETFB_HUMAN Electron transfer flavoprotein subunit beta
P38117-2	ETFB	0.05064	0.011	13.6877	4	ETFB_HUMAN Isoform 2 of Electron transfer flavoprotein subunit beta
P38159	RBMX	very slow	0.00719	>200	2	RBMX_HUMAN RNA-binding motif protein, X chromosome
P38571	LIPA	0.13226	0.0105	5.24079	1	LICH_HUMAN Lysosomal acid lipase/cholesteryl ester hydrolase
P38606	ATP6V1A	0.15203	0.02404	4.55928	2	VATA_HUMAN V-type proton ATPase catalytic subunit A
P38646	HSPA9	0.03247	0.0087	21.3473	20	GRP75_HUMAN Stress-70 protein, mitochondrial
P38919	EIF4A3	0.08445	0.00877	8.20778	4	IF4A3_HUMAN Eukaryotic initiation factor 4A-III
P39019	RPS19	0.02562	0.00498	27.0549	3	RS19_HUMAN 40S ribosomal protein S19
P39023	RPL3	0.06432	0.00909	10.7765	4	RL3_HUMAN 60S ribosomal protein L3
P39656	DDOST	0.05993	0.01529	11.5659	4	OST48_HUMAN Dolichyl-diphosphooligosaccharide--protein glycosyltransferase 48 kDa subunit
P39748	FEN1	0.09271	0.00817	7.47651	6	FEN1_HUMAN Flap endonuclease 1
P39880-3	CUX1	0.04092	0.0042	16.9391	12	CUX1_HUMAN Isoform 3 of Homeobox protein cut-like 1
P40227	CCT6A	0.05741	0.00854	12.0736	6	TCPZ_HUMAN T-complex protein 1 subunit zeta
P40424	PBX1	very slow	0.0148	>200	1	PBX1_HUMAN Pre-B-cell leukemia transcription factor 1
P40429	RPL13A	0.09155	0.01776	7.57124	5	RL13A_HUMAN 60S ribosomal protein L13a
P40616	ARL1	0.03732	0.00598	18.5731	2	ARL1_HUMAN ADP-ribosylation factor-like protein 1
P40692	MLH1	0.09368	0.01297	7.39909	1	MLH1_HUMAN DNA mismatch repair protein Mlh1
P40763	STAT3	0.01412	0.00728	49.0897	4	STAT3_HUMAN Signal transducer and activator of transcription 3
P40818	USP8	very slow	0.00664	>200	3	UBP8_HUMAN Ubiquitin carboxyl-terminal hydrolase 8
P40925-3	MDH1	0.01177	0.00719	58.891	10	MDHC_HUMAN Isoform 3 of Malate dehydrogenase, cytoplasmic
P40926	MDH2	very slow	0.02234	>200	8	MDHM_HUMAN Malate dehydrogenase, mitochondrial
P40937	RFC5	0.09508	0.0098	7.29015	1	RFC5_HUMAN Replication factor C subunit 5
P40939	HADHA	0.05028	0.00627	13.7857	13	ECHA_HUMAN Trifunctional enzyme subunit alpha, mitochondrial
P41091	EIF2S3	0.0261	0.00566	26.5574	1	IF2G_HUMAN Eukaryotic translation initiation factor 2 subunit 3
P41212	ETV6	0.01277	0.01213	54.2793	1	ETV6_HUMAN Transcription factor ETV6
P41214	EIF2D	0.01931	0.00377	35.8958	4	EIF2D_HUMAN Eukaryotic translation initiation factor 2D
P41223	BUD31	0.03237	0.01284	21.4133	3	BUD31_HUMAN Protein BUD31 homolog
P41227	NAA10	0.06555	0.00557	10.5743	1	NAA10_HUMAN N-alpha-acetyltransferase 10
P41240	CSK	very slow	0.00588	>200	2	CSK_HUMAN Tyrosine-protein kinase CSK
P41250	GARS	0.04899	0.01243	14.1487	4	SYG_HUMAN Glycine--tRNA ligase
P41252	IARS	0.02994	0.00931	23.1512	2	SYIC_HUMAN Isoleucine--tRNA ligase, cytoplasmic
P41440	SLC19A1	0.04187	0.00987	16.5547	1	S19A1_HUMAN Folate transporter 1
P41743	PRKCI	0.05599	0.01001	12.3798	1	KPCI_HUMAN Protein kinase C iota type
P42166	TMPO	0.02118	0.00492	32.7265	10	LAP2A_HUMAN Lamina-associated polypeptide 2, isoform alpha
P42167	TMPO	0.00909	0.00963	76.2538	3	LAP2B_HUMAN Lamina-associated polypeptide 2, isoforms beta/gamma
P42224	STAT1	0.04301	0.00558	16.116	6	STAT1_HUMAN Signal transducer and activator of transcription 1-alpha/beta
P42285	SKIV2L2	0.05702	0.0084	12.1562	2	SK2L2_HUMAN Superkiller viralicidic activity 2-like 2
P42694	HELZ	0.03521	0.00937	19.6861	1	HELZ_HUMAN Probable helicase with zinc finger domain
P42704	LRPPRC	0.0694	0.01072	9.98771	25	LPPRC_HUMAN Leucine-rich PPR motif-containing protein, mitochondrial
P42765	ACAA2	0.04811	0.00446	14.4075	2	THIM_HUMAN 3-ketoacyl-CoA thiolase, mitochondrial
P42766	RPL35	0.14182	0.0248	4.88751	7	RL35_HUMAN 60S ribosomal protein L35
P43155	CRAT	0.05709	0.01029	12.1413	2	CACP_HUMAN Carnitine O-acetyltransferase
P43243	MATR3	0.03819	0.00303	18.15	9	MATR3_HUMAN Matrin-3
P43246	MSH2	0.0906	0.01616	7.65063	1	MSH2_HUMAN DNA mismatch repair protein Msh2
P43250-2	GRK6	0.06441	0.02193	10.7615	1	GRK6_HUMAN Isoform GRK6B of G protein-coupled receptor kinase 6
P43304	GPD2	0.11176	0.0085	6.2021	3	GPDM_HUMAN Glycerol-3-phosphate dehydrogenase, mitochondrial
P43307	SSR1	0.01775	0.00613	39.0505	1	SSRA_HUMAN Translocon-associated protein subunit alpha
P43487	RANBP1	0.000634887	0.00411	>200	3	RANG_HUMAN Ran-specific GTPase-activating protein
P43490	NAMPT	0.01744	0.00355	39.7447	2	NAMPT_HUMAN Nicotinamide phosphoribosyltransferase
P43686	PSMC4	0.02765	0.00467	25.0686	4	PRS6B_HUMAN 26S protease regulatory subunit 6B
P43897-2	TSFM	0.0414	0.00493	16.7427	4	EFTS_HUMAN Isoform 2 of Elongation factor Ts, mitochondrial
P45877	PPIC	0.04808	0.00677	14.4165	2	PPIC_HUMAN Peptidyl-prolyl cis-trans isomerase C
P45880-1	VDAC2	0.02705	0.00887	25.6247	8	VDAC2_HUMAN Isoform 1 of Voltage-dependent anion-selective channel protein 2
P45954	ACADSB	0.03401	0.00383	20.3807	1	ACDSB_HUMAN Short/branched chain specific acyl-CoA dehydrogenase, mitochondrial
P45973	CBX5	0.04498	0.00714	15.4101	3	CBX5_HUMAN Chromobox protein homolog 5
P45974	USP5	0.03883	0.00572	17.8508	1	UBP5_HUMAN Ubiquitin carboxyl-terminal hydrolase 5
P46013	MKI67	0.0117	0.01132	59.2433	42	KI67_HUMAN Antigen KI-67
P46019	PHKA2	0.01939	0.00248	35.7477	1	KPB2_HUMAN Phosphorylase b kinase regulatory subunit alpha, liver isoform
P46060	RANGAP1	0.0097	0.00312	71.4585	6	RAGP1_HUMAN Ran GTPase-activating protein 1
P46063	RECQL	0.03532	0.01723	19.6248	1	RECQ1_HUMAN ATP-dependent DNA helicase Q1
P46087-4	NOP2	0.01621	0.01176	42.7605	1	NOP2_HUMAN Isoform 4 of Putative ribosomal RNA methyltransferase NOP2
P46109	CRKL	very slow	0.01925	>200	1	CRKL_HUMAN Crk-like protein
P46199	MTIF2	0.05043	0.00787	13.7447	3	IF2M_HUMAN Translation initiation factor IF-2, mitochondrial
P46459	NSF	0.01969	0.00957	35.203	11	NSF_HUMAN Vesicle-fusing ATPase
P46527	CDKN1B	0.06335	0.01419	10.9415	1	CDN1B_HUMAN Cyclin-dependent kinase inhibitor 1B
P46734-3	MAP2K3	0.02378	0.00643	29.1483	1	MP2K3_HUMAN Isoform 2 of Dual specificity mitogen-activated protein kinase kinase 3
P46776	RPL27A	0.0568	0.00462	12.2033	4	RL27A_HUMAN 60S ribosomal protein L27a
P46777	RPL5	0.02555	0.00857	27.129	10	RL5_HUMAN 60S ribosomal protein L5
P46778	RPL21	0.02019	0.00235	34.3312	3	RL21_HUMAN 60S ribosomal protein L21
P46779-3	RPL28	0.01253	0.00216	55.319	3	RL28_HUMAN Isoform 3 of 60S ribosomal protein L28
P46781	RPS9	0.07239	0.01535	9.57518	4	RS9_HUMAN 40S ribosomal protein S9
P46782	RPS5	0.14239	0.02865	4.86795	4	RS5_HUMAN 40S ribosomal protein S5
P46783	RPS10	0.27685	0.05871	2.50369	2	RS10_HUMAN 40S ribosomal protein S10
P46940	IQGAP1	0.02845	0.00505	24.3637	19	IQGA1_HUMAN Ras GTPase-activating-like protein IQGAP1
P46977	STT3A	0.04338	0.00509	15.9785	3	STT3A_HUMAN Dolichyl-diphosphooligosaccharide--protein glycosyltransferase subunit STT3A
P47755	CAPZA2	0.05214	0.01459	13.294	1	CAZA2_HUMAN F-actin-capping protein subunit alpha-2
P47756	CAPZB	0.03212	0.00599	21.5799	1	CAPZB_HUMAN F-actin-capping protein subunit beta
P47813	EIF1AX	0.03998	0.00979	17.3373	5	IF1AX_HUMAN Eukaryotic translation initiation factor 1A, X-chromosomal
P47897	QARS	0.03188	0.00326	21.7424	1	SYQ_HUMAN Glutamine--tRNA ligase
P47914	RPL29	0.1007	0.01642	6.88329	5	RL29_HUMAN 60S ribosomal protein L29
P47974	ZFP36L2	0.02039	0.00723	33.9945	1	TISD_HUMAN Zinc finger protein 36, C3H1 type-like 2
P47989	XDH	0.01605	0.00787	43.1867	1	XDH_HUMAN Xanthine dehydrogenase/oxidase
P48047	ATP5O	0.02491	0.00751	27.8261	6	ATPO_HUMAN ATP synthase subunit O, mitochondrial
P48059-3	LIMS1	0.01708	0.0029	40.5824	3	LIMS1_HUMAN Isoform 3 of LIM and senescent cell antigen-like-containing domain protein 1
P48431	SOX2	0.03249	0.00432	21.3342	1	SOX2_HUMAN Transcription factor SOX-2
P48443	RXRG	0.03719	0.00498	18.638	2	RXRG_HUMAN Retinoic acid receptor RXR-gamma
P48444	ARCN1	0.04316	0.00866	16.0599	8	COPD_HUMAN Coatomer subunit delta
P48552	NRIP1	0.08067	0.01523	8.59238	3	NRIP1_HUMAN Nuclear receptor-interacting protein 1
P48556	PSMD8	0.03387	0.00538	20.4649	5	PSMD8_HUMAN 26S proteasome non-ATPase regulatory subunit 8
P48634	PRRC2A	0.01196	0.00829	57.9554	8	PRC2A_HUMAN Protein PRRC2A
P48643	CCT5	0.08342	0.00797	8.30912	12	TCPE_HUMAN T-complex protein 1 subunit epsilon
P48651	PTDSS1	0.03449	0.01127	20.097	1	PTSS1_HUMAN Phosphatidylserine synthase 1
P48729-2	CSNK1A1	0.0303	0.0037	22.8761	1	KC1A_HUMAN Isoform 2 of Casein kinase I isoform alpha
P48735	IDH2	0.05249	0.01286	13.2053	8	IDHP_HUMAN Isocitrate dehydrogenase [NADP], mitochondrial
P48739-2	PITPNB	0.03542	0.01254	19.5694	3	PIPNB_HUMAN Isoform 2 of Phosphatidylinositol transfer protein beta isoform
P49023-3	PXN	0.00705	0.0014	98.3187	3	PAXI_HUMAN Isoform Gamma of Paxillin
P49069	CAMLG	0.01975	0.00571	35.0961	2	CAMLG_HUMAN Calcium signal-modulating cyclophilin ligand
P49137	MAPKAPK2	0.0317	0.00504	21.8658	2	MAPK2_HUMAN MAP kinase-activated protein kinase 2
P49189	ALDH9A1	0.0083	0.0076	83.5117	2	AL9A1_HUMAN 4-trimethylaminobutyraldehyde dehydrogenase
P49207	RPL34	very slow	0.00575	>200	1	RL34_HUMAN 60S ribosomal protein L34
P49326	FMO5	0.05167	0.01326	13.4149	1	FMO5_HUMAN Dimethylaniline monooxygenase [N-oxide-forming] 5
P49327	FASN	0.07091	0.01231	9.77503	3	FAS_HUMAN Fatty acid synthase
P49368	CCT3	0.17036	0.02226	4.06872	4	TCPG_HUMAN T-complex protein 1 subunit gamma
P49411	TUFM	0.03491	0.00612	19.8553	6	EFTU_HUMAN Elongation factor Tu, mitochondrial
P49419	ALDH7A1	0.02406	0.00738	28.8091	5	AL7A1_HUMAN Alpha-aminoadipic semialdehyde dehydrogenase
P49454	CENPF	0.03482	0.00772	19.9066	7	CENPF_HUMAN Centromere protein F
P49458	SRP9	0.0479	0.0084	14.4707	5	SRP09_HUMAN Signal recognition particle 9 kDa protein
P49585	PCYT1A	0.04967	0.01291	13.955	1	PCY1A_HUMAN Choline-phosphate cytidylyltransferase A
P49588	AARS	0.02521	0.00752	27.4949	13	SYAC_HUMAN Alanine--tRNA ligase, cytoplasmic
P49589-3	CARS	0.01175	0.00648	58.9912	2	SYCC_HUMAN Isoform 3 of Cysteine--tRNA ligase, cytoplasmic
P49590	HARS2	0.0138	0.00719	50.2281	1	SYHM_HUMAN Probable histidine--tRNA ligase, mitochondrial
P49591	SARS	0.07456	0.01635	9.2965	1	SYSC_HUMAN Serine--tRNA ligase, cytoplasmic
P49642	PRIM1	0.04586	0.00897	15.1144	1	PRI1_HUMAN DNA primase small subunit
P49643	PRIM2	0.02981	0.00433	23.2522	2	PRI2_HUMAN DNA primase large subunit
P49736	MCM2	0.05725	0.00555	12.1074	8	MCM2_HUMAN DNA replication licensing factor MCM2
P49748-3	ACADVL	0.03616	0.00708	19.1689	7	ACADV_HUMAN Isoform 3 of Very long-chain specific acyl-CoA dehydrogenase, mitochondrial
P49750-4	YLPM1	0.01697	0.00776	40.8454	8	YLPM1_HUMAN Isoform 4 of YLP motif-containing protein 1
P49755	TMED10	0.06068	0.01014	11.423	6	TMEDA_HUMAN Transmembrane emp24 domain-containing protein 10
P49756	RBM25	0.03445	0.00429	20.1204	5	RBM25_HUMAN RNA-binding protein 25
P49757	NUMB	0.04076	0.01242	17.0056	2	NUMB_HUMAN Protein numb homolog
P49770	EIF2B2	0.01315	0.00564	52.7108	2	EI2BB_HUMAN Translation initiation factor eIF-2B subunit beta
P49773	HINT1	0.00774	0.00404	89.5539	2	HINT1_HUMAN Histidine triad nucleotide-binding protein 1
P49790	NUP153	0.01782	0.0046	38.8971	11	NU153_HUMAN Nuclear pore complex protein Nup153
P49792	RANBP2	0.03416	0.01103	20.2912	9	RBP2_HUMAN E3 SUMO-protein ligase RanBP2
P49821	NDUFV1	0.11186	0.01095	6.19656	3	NDUV1_HUMAN NADH dehydrogenase [ubiquinone] flavoprotein 1, mitochondrial
P49840	GSK3A	0.03411	0.0185	20.3209	2	GSK3A_HUMAN Glycogen synthase kinase-3 alpha
P49902	NT5C2	0.03026	0.005	22.9064	3	5NTC_HUMAN Cytosolic purine 5'-nucleotidase
P49903	SEPHS1	0.04997	0.00789	13.8713	1	SPS1_HUMAN Selenide, water dikinase 1
P49915	GMPS	0.03874	0.01005	17.8923	12	GUAA_HUMAN GMP synthase [glutamine-hydrolyzing]
P49959	MRE11A	0.02253	0.00888	30.7655	1	MRE11_HUMAN Double-strand break repair protein MRE11A
P50151	GNG10	0.0198	0.00511	35.0074	1	GBG10_HUMAN Guanine nucleotide-binding protein G(I)/G(S)/G(O) subunit gamma-10
P50213	IDH3A	0.01594	0.00625	43.4848	3	IDH3A_HUMAN Isocitrate dehydrogenase [NAD] subunit alpha, mitochondrial
P50219	MNX1	0.03116	0.00804	22.2448	1	MNX1_HUMAN Motor neuron and pancreas homeobox protein 1
P50224-3	SULT1A3	0.04593	0.00998	15.0914	1	ST1A3_HUMAN Isoform 3 of Sulfotransferase 1A3/1A4
P50395	GDI2	0.01186	0.007	58.4441	6	GDIB_HUMAN Rab GDP dissociation inhibitor beta
P50416	CPT1A	very slow	0.00751	>200	3	CPT1A_HUMAN Carnitine O-palmitoyltransferase 1, liver isoform
P50454	SERPINH1	0.02019	0.00366	34.3312	10	SERPH_HUMAN Serpin H1
P50461	CSRP3	0.03591	0.00848	19.3023	1	CSRP3_HUMAN Cysteine and glycine-rich protein 3
P50502	ST13	0.05849	0.01084	11.8507	9	F10A1_HUMAN Hsc70-interacting protein
P50548	ERF	0.04786	0.00309	14.4828	2	ERF_HUMAN ETS domain-containing transcription factor ERF
P50552	VASP	0.04855	0.00983	14.277	4	VASP_HUMAN Vasodilator-stimulated phosphoprotein
P50570-4	DNM2	0.03432	0.00314	20.1966	2	DYN2_HUMAN Isoform 4 of Dynamin-2
P50579	METAP2	very slow	0.0083	>200	1	MAP2_HUMAN Methionine aminopeptidase 2
P50750-2	CDK9	0.13455	0.01298	5.1516	1	CDK9_HUMAN Isoform 2 of Cyclin-dependent kinase 9
P50897	PPT1	0.10555	0.00503	6.567	2	PPT1_HUMAN Palmitoyl-protein thioesterase 1
P50990	CCT8	0.04923	0.01136	14.0798	7	TCPQ_HUMAN T-complex protein 1 subunit theta
P50991	CCT4	0.03484	0.00467	19.8952	9	TCPD_HUMAN T-complex protein 1 subunit delta
P50995	ANXA11	0.01235	0.00421	56.1253	2	ANX11_HUMAN Annexin A11
P51003	PAPOLA	0.04377	0.00613	15.8361	2	PAPOA_HUMAN Poly(A) polymerase alpha
P51114	FXR1	0.02834	0.00919	24.4583	3	FXR1_HUMAN Fragile X mental retardation syndrome-related protein 1
P51148-2	RAB5C	0.02627	0.00718	26.3855	4	RAB5C_HUMAN Isoform 2 of Ras-related protein Rab-5C
P51149	RAB7A	0.06223	0.01837	11.1385	6	RAB7A_HUMAN Ras-related protein Rab-7a
P51153	RAB13	0.05527	0.01751	12.5411	2	RAB13_HUMAN Ras-related protein Rab-13
P51160	PDE6C	0.0271	0.00782	25.5774	1	PDE6C_HUMAN Cone cGMP-specific 3',5'-cyclic phosphodiesterase subunit alpha'
P51398	DAP3	0.07199	0.00303	9.62838	2	RT29_HUMAN 28S ribosomal protein S29, mitochondrial
P51532	SMARCA4	0.1036	0.00901	6.69061	2	SMCA4_HUMAN Transcription activator BRG1
P51572-2	BCAP31	0.03535	0.00967	19.6081	13	BAP31_HUMAN Isoform 2 of B-cell receptor-associated protein 31
P51617	IRAK1	0.05067	0.01231	13.6796	1	IRAK1_HUMAN Interleukin-1 receptor-associated kinase 1
P51648-2	ALDH3A2	0.01058	0.00965	65.5149	4	AL3A2_HUMAN Isoform 2 of Fatty aldehyde dehydrogenase
P51649-2	ALDH5A1	0.10241	0.00397	6.76835	3	SSDH_HUMAN Isoform 2 of Succinate-semialdehyde dehydrogenase, mitochondrial
P51659-2	HSD17B4	very slow	0.01456	>200	9	DHB4_HUMAN Isoform 2 of Peroxisomal multifunctional enzyme type 2
P51665	PSMD7	0.05562	0.00991	12.4622	2	PSMD7_HUMAN 26S proteasome non-ATPase regulatory subunit 7
P51668	UBE2D1	0.00415	0.00557	167.023	1	UB2D1_HUMAN Ubiquitin-conjugating enzyme E2 D1
P51784	USP11	0.02805	0.02015	24.7111	1	UBP11_HUMAN Ubiquitin carboxyl-terminal hydrolase 11
P51809-2	VAMP7	0.01192	0.00905	58.1499	1	VAMP7_HUMAN Isoform 2 of Vesicle-associated membrane protein 7
P51858-3	HDGF	0.03922	0.01183	17.6733	8	HDGF_HUMAN Isoform 3 of Hepatoma-derived growth factor
P51946	CCNH	0.01951	0.00999	35.5278	1	CCNH_HUMAN Cyclin-H
P51965	UBE2E1	0.01782	0.00542	38.8971	2	UB2E1_HUMAN Ubiquitin-conjugating enzyme E2 E1
P51970	NDUFA8	0.0352	0.00471	19.6917	4	NDUA8_HUMAN NADH dehydrogenase [ubiquinone] 1 alpha subcomplex subunit 8
P51991	HNRNPA3	0.04108	0.0075	16.8731	5	ROA3_HUMAN Heterogeneous nuclear ribonucleoprotein A3
P52209	PGD	0.04907	0.00876	14.1257	10	6PGD_HUMAN 6-phosphogluconate dehydrogenase, decarboxylating
P52272	HNRNPM	0.02422	0.00377	28.6188	10	HNRPM_HUMAN Heterogeneous nuclear ribonucleoprotein M
P52272-2	HNRNPM	0.02905	0.00658	23.8605	1	HNRPM_HUMAN Isoform 2 of Heterogeneous nuclear ribonucleoprotein M
P52292	KPNA2	0.02204	0.00493	31.4495	8	IMA1_HUMAN Importin subunit alpha-1
P52294	KPNA1	0.01373	0.00844	50.4841	3	IMA5_HUMAN Importin subunit alpha-5
P52435	POLR2J	0.10503	0.01484	6.59952	1	RPB11_HUMAN DNA-directed RNA polymerase II subunit RPB11-a
P52569-3	SLC7A2	0.09124	0.01195	7.59697	3	CTR2_HUMAN Isoform 3 of Low affinity cationic amino acid transporter 2
P52594-4	AGFG1	0.00098337	0.00428	>200	4	AGFG1_HUMAN Isoform 4 of Arf-GAP domain and FG repeat-containing protein 1
P52597	HNRNPF	0.02468	0.0081	28.0854	3	HNRPF_HUMAN Heterogeneous nuclear ribonucleoprotein F
P52701	MSH6	0.10276	0.01125	6.7453	6	MSH6_HUMAN DNA mismatch repair protein Msh6
P52735	VAV2	0.00474	0.00623	146.234	1	VAV2_HUMAN Guanine nucleotide exchange factor VAV2
P52756	RBM5	0.01523	0.0072	45.512	2	RBM5_HUMAN RNA-binding protein 5
P52788	SMS	0.01285	0.01144	53.9414	2	SPSY_HUMAN Spermine synthase
P52907	CAPZA1	0.01419	0.00581	48.8476	2	CAZA1_HUMAN F-actin-capping protein subunit alpha-1
P52926-2	HMGA2	very slow	0.00731	>200	1	HMGA2_HUMAN Isoform 2 of High mobility group protein HMGI-C
P52943-2	CRIP2	very slow	0.00871	>200	3	CRIP2_HUMAN Isoform 2 of Cysteine-rich protein 2
P52948	NUP98	0.0174	0.00717	39.836	3	NUP98_HUMAN Nuclear pore complex protein Nup98-Nup96
P53004	BLVRA	0.0258	0.00668	26.8662	4	BIEA_HUMAN Biliverdin reductase A
P53007	SLC25A1	0.0549	0.01916	12.6256	2	TXTP_HUMAN Tricarboxylate transport protein, mitochondrial
P53041	PPP5C	0.03721	0.00554	18.628	2	PPP5_HUMAN Serine/threonine-protein phosphatase 5
P53350	PLK1	0.0381	0.00601	18.1928	3	PLK1_HUMAN Serine/threonine-protein kinase PLK1
P53365	ARFIP2	0.02947	0.00886	23.5204	1	ARFP2_HUMAN Arfaptin-2
P53367	ARFIP1	0.01605	0.00673	43.1867	3	ARFP1_HUMAN Arfaptin-1
P53597	SUCLG1	0.0352	0.00733	19.6917	4	SUCA_HUMAN Succinyl-CoA ligase [ADP/GDP-forming] subunit alpha, mitochondrial
P53602	MVD	0.02011	0.0086	34.4678	1	MVD1_HUMAN Diphosphomevalonate decarboxylase
P53618	COPB1	0.00555	0.00929	124.891	3	COPB_HUMAN Coatomer subunit beta
P53621-2	COPA	very slow	0.00618	>200	11	COPA_HUMAN Isoform 2 of Coatomer subunit alpha
P53701	HCCS	0.0678	0.01532	10.2234	1	CCHL_HUMAN Cytochrome c-type heme lyase
P53801	PTTG1IP	0.12022	0.01297	5.76566	1	PTTG_HUMAN Pituitary tumor-transforming gene 1 protein-interacting protein
P53804	TTC3	0.02597	0.00529	26.6903	1	TTC3_HUMAN E3 ubiquitin-protein ligase TTC3
P53816	PLA2G16	0.03568	0.00616	19.4268	1	HRSL3_HUMAN HRAS-like suppressor 3
P53985	SLC16A1	0.03649	0.00674	18.9955	1	MOT1_HUMAN Monocarboxylate transporter 1
P53990-5	IST1	0.01945	0.00265	35.6374	2	IST1_HUMAN Isoform 5 of IST1 homolog
P53999	SUB1	0.04137	0.0029	16.7548	3	TCP4_HUMAN Activated RNA polymerase II transcriptional coactivator p15
P54136	RARS	0.01455	0.0079	47.639	1	SYRC_HUMAN Arginine--tRNA ligase, cytoplasmic
P54577	YARS	0.02359	0.00649	29.3831	13	SYYC_HUMAN Tyrosine--tRNA ligase, cytoplasmic
P54578	USP14	0.02941	0.007	23.5684	5	UBP14_HUMAN Ubiquitin carboxyl-terminal hydrolase 14
P54619-3	PRKAG1	0.02556	0.01393	27.1184	1	AAKG1_HUMAN Isoform 3 of 5'-AMP-activated protein kinase subunit gamma-1
P54709	ATP1B3	0.08217	0.00883	8.43553	6	AT1B3_HUMAN Sodium/potassium-transporting ATPase subunit beta-3
P54764	EPHA4	0.03641	0.00873	19.0373	1	EPHA4_HUMAN Ephrin type-A receptor 4
P54819	AK2	very slow	0.00907	>200	7	KAD2_HUMAN Adenylate kinase 2, mitochondrial
P54886	ALDH18A1	0.02442	0.00711	28.3844	4	P5CS_HUMAN Delta-1-pyrroline-5-carboxylate synthase
P54920	NAPA	0.03263	0.00976	21.2426	6	SNAA_HUMAN Alpha-soluble NSF attachment protein
P55010	EIF5	0.02789	0.01029	24.8529	11	IF5_HUMAN Eukaryotic translation initiation factor 5
P55011	SLC12A2	0.08036	0.00641	8.62552	6	S12A2_HUMAN Solute carrier family 12 member 2
P55036	PSMD4	0.05697	0.01008	12.1669	1	PSMD4_HUMAN 26S proteasome non-ATPase regulatory subunit 4
P55039	DRG2	0.02137	0.00385	32.4355	5	DRG2_HUMAN Developmentally-regulated GTP-binding protein 2
P55060	CSE1L	0.04385	0.00845	15.8072	13	XPO2_HUMAN Exportin-2
P55072	VCP	very slow	0.01792	>200	6	TERA_HUMAN Transitional endoplasmic reticulum ATPase
P55081	MFAP1	0.04082	0.00794	16.9806	2	MFAP1_HUMAN Microfibrillar-associated protein 1
P55084	HADHB	0.03249	0.00728	21.3342	4	ECHB_HUMAN Trifunctional enzyme subunit beta, mitochondrial
P55196-5	MLLT4	0.05108	0.00621	13.5698	1	AFAD_HUMAN Isoform 5 of Afadin
P55199	ELL	0.01664	0.00376	41.6555	1	ELL_HUMAN RNA polymerase II elongation factor ELL
P55209	NAP1L1	very slow	0.00902	>200	1	NP1L1_HUMAN Nucleosome assembly protein 1-like 1
P55263	ADK	0.01794	0.00865	38.637	1	ADK_HUMAN Adenosine kinase
P55265-4	ADAR	0.05505	0.00756	12.5912	15	DSRAD_HUMAN Isoform 4 of Double-stranded RNA-specific adenosine deaminase
P55317	FOXA1	0.06493	0.00845	10.6753	1	FOXA1_HUMAN Hepatocyte nuclear factor 3-alpha
P55735	SEC13	0.01172	0.00699	59.1423	1	SEC13_HUMAN Protein SEC13 homolog
P55769	NHP2L1	0.0982	0.01076	7.05853	3	NH2L1_HUMAN NHP2-like protein 1
P55795	HNRNPH2	0.05026	0.0151	13.7912	3	HNRH2_HUMAN Heterogeneous nuclear ribonucleoprotein H2
P55854	SUMO3	0.05694	0.00745	12.1733	3	SUMO3_HUMAN Small ubiquitin-related modifier 3
P55884-2	EIF3B	0.01507	0.007	45.9952	2	EIF3B_HUMAN Isoform 2 of Eukaryotic translation initiation factor 3 subunit B
P56159	GFRA1	0.13544	0.00633	5.11774	11	GFRA1_HUMAN GDNF family receptor alpha-1
P56181-2	NDUFV3	0.02397	0.00736	28.9173	1	NDUV3_HUMAN Isoform 2 of NADH dehydrogenase [ubiquinone] flavoprotein 3, mitochondrial
P56182	RRP1	0.07112	0.0037	9.74616	3	RRP1_HUMAN Ribosomal RNA processing protein 1 homolog A
P56192	MARS	0.03828	0.01609	18.1073	1	SYMC_HUMAN Methionine--tRNA ligase, cytoplasmic
P56211	ARPP19	0.02405	0.00435	28.8211	3	ARP19_HUMAN cAMP-regulated phosphoprotein 19
P56270-2	MAZ	0.02735	0.00263	25.3436	2	MAZ_HUMAN Isoform 2 of Myc-associated zinc finger protein
P56282	POLE2	0.02541	0.01153	27.2785	1	DPOE2_HUMAN DNA polymerase epsilon subunit 2
P56378-2	MP68	0.11847	0.01843	5.85082	1	68MP_HUMAN Isoform 2 of 6.8 kDa mitochondrial proteolipid
P56381	ATP5E	0.13751	0.01558	5.0407	1	ATP5E_HUMAN ATP synthase subunit epsilon, mitochondrial
P56385	ATP5I	0.06173	0.00418	11.2287	1	ATP5I_HUMAN ATP synthase subunit e, mitochondrial
P56545-2	CTBP2	0.01963	0.00877	35.3106	1	CTBP2_HUMAN Isoform 2 of C-terminal-binding protein 2
P56556	NDUFA6	0.09975	0.01096	6.94884	2	NDUA6_HUMAN NADH dehydrogenase [ubiquinone] 1 alpha subcomplex subunit 6
P56589	PEX3	0.06215	0.01546	11.1528	1	PEX3_HUMAN Peroxisomal biogenesis factor 3
P56715	RP1	0.00705	0.00314	98.3187	1	RP1_HUMAN Oxygen-regulated protein 1
P56937	HSD17B7	0.03513	0.00671	19.7309	1	DHB7_HUMAN 3-keto-steroid reductase
P56945-6	BCAR1	0.03663	0.01293	18.9229	1	BCAR1_HUMAN Isoform 6 of Breast cancer anti-estrogen resistance protein 1
P56962	STX17	0.04016	0.01872	17.2596	1	STX17_HUMAN Syntaxin-17
P57076	C21orf59	0.01787	0.00614	38.7883	5	CU059_HUMAN UPF0769 protein C21orf59
P57105	SYNJ2BP	0.0126	0.00947	55.0117	1	SYJ2B_HUMAN Synaptojanin-2-binding protein
P57723	PCBP4	0.03348	0.00548	20.7033	1	PCBP4_HUMAN Poly(rC)-binding protein 4
P57737-3	CORO7	0.05117	0.01673	13.546	5	CORO7_HUMAN Isoform 3 of Coronin-7
P57740	NUP107	0.08293	0.00788	8.35822	2	NU107_HUMAN Nuclear pore complex protein Nup107
P57772	EEFSEC	0.00114	0.00734	>200	2	SELB_HUMAN Selenocysteine-specific elongation factor
P58107	EPPK1	0.08196	0.00792	8.45714	5	EPIPL_HUMAN Epiplakin
P58546	MTPN	very slow	0.00779	>200	1	MTPN_HUMAN Myotrophin
P59998-2	ARPC4	0.05899	0.00957	11.7502	1	ARPC4_HUMAN Isoform 2 of Actin-related protein 2/3 complex subunit 4
P60059	SEC61G	0.04195	0.00716	16.5232	1	SC61G_HUMAN Protein transport protein Sec61 subunit gamma
P60174	TPI1	0.00395	0.01669	175.48	8	TPIS_HUMAN Triosephosphate isomerase
P60228	EIF3E	0.042	0.0052	16.5035	6	EIF3E_HUMAN Eukaryotic translation initiation factor 3 subunit E
P60468	SEC61B	0.05242	0.01145	13.223	1	SC61B_HUMAN Protein transport protein Sec61 subunit beta
P60520	GABARAPL2	0.04605	0.0057	15.0521	4	GBRL2_HUMAN Gamma-aminobutyric acid receptor-associated protein-like 2
P60604	UBE2G2	0.07961	0.00505	8.70679	1	UB2G2_HUMAN Ubiquitin-conjugating enzyme E2 G2
P60660-2	MYL6	0.06845	0.00752	10.1263	1	MYL6_HUMAN Isoform Smooth muscle of Myosin light polypeptide 6
P60709	ACTB	0.0286	0.02051	24.2359	3	ACTB_HUMAN Actin, cytoplasmic 1
P60842	EIF4A1	0.02434	0.00576	28.4777	3	IF4A1_HUMAN Eukaryotic initiation factor 4A-I
P60866-2	RPS20	0.05841	0.01271	11.8669	3	RS20_HUMAN Isoform 2 of 40S ribosomal protein S20
P60900	PSMA6	0.18682	0.02977	3.71024	3	PSA6_HUMAN Proteasome subunit alpha type-6
P60903	S100A10	0.13544	0.01852	5.11774	3	S10AA_HUMAN Protein S100-A10
P60953	CDC42	very slow	0.0058	>200	2	CDC42_HUMAN Cell division control protein 42 homolog
P60953-1	CDC42	0.01341	0.00843	51.6888	1	CDC42_HUMAN Isoform 1 of Cell division control protein 42 homolog
P60981	DSTN	0.0218	0.00413	31.7957	7	DEST_HUMAN Destrin
P60983	GMFB	very slow	0.00437	>200	1	GMFB_HUMAN Glia maturation factor beta
P61006	RAB8A	0.04866	0.00453	14.2447	7	RAB8A_HUMAN Ras-related protein Rab-8A
P61009	SPCS3	0.02691	0.00828	25.758	1	SPCS3_HUMAN Signal peptidase complex subunit 3
P61011	SRP54	0.03312	0.002	20.9284	12	SRP54_HUMAN Signal recognition particle 54 kDa protein
P61019	RAB2A	0.04945	0.00978	14.0171	1	RAB2A_HUMAN Ras-related protein Rab-2A
P61026	RAB10	0.05502	0.01297	12.5981	5	RAB10_HUMAN Ras-related protein Rab-10
P61077-3	UBE2D3	0.03206	0.00952	21.6203	1	UB2D3_HUMAN Isoform 3 of Ubiquitin-conjugating enzyme E2 D3
P61081	UBE2M	0.01268	0.00514	54.6646	4	UBC12_HUMAN NEDD8-conjugating enzyme Ubc12
P61086	UBE2K	very slow	0.00565	>200	1	UBE2K_HUMAN Ubiquitin-conjugating enzyme E2 K
P61106	RAB14	0.05811	0.01326	11.9282	2	RAB14_HUMAN Ras-related protein Rab-14
P61158	ACTR3	0.03756	0.00804	18.4544	3	ARP3_HUMAN Actin-related protein 3
P61160-2	ACTR2	0.01624	0.00432	42.6815	7	ARP2_HUMAN Isoform 2 of Actin-related protein 2
P61163	ACTR1A	0.05298	0.00557	13.0832	5	ACTZ_HUMAN Alpha-centractin
P61165	TMEM258	0.03233	0.00798	21.4398	1	TM258_HUMAN Transmembrane protein 258
P61221	ABCE1	0.00723	0.00564	95.871	5	ABCE1_HUMAN ATP-binding cassette sub-family E member 1
P61225	RAP2B	0.03001	0.0067	23.0972	2	RAP2B_HUMAN Ras-related protein Rap-2b
P61247	RPS3A	0.11909	0.02379	5.82036	6	RS3A_HUMAN 40S ribosomal protein S3a
P61254	RPL26	0.17456	0.02882	3.97082	7	RL26_HUMAN 60S ribosomal protein L26
P61289-2	PSME3	0.04833	0.01465	14.342	2	PSME3_HUMAN Isoform 2 of Proteasome activator complex subunit 3
P61353	RPL27	0.11686	0.02078	5.93143	4	RL27_HUMAN 60S ribosomal protein L27
P61513	RPL37A	0.03814	0.0085	18.1738	2	RL37A_HUMAN 60S ribosomal protein L37a
P61587	RND3	0.07911	0.00542	8.76181	2	RND3_HUMAN Rho-related GTP-binding protein RhoE
P61604	HSPE1	very slow	0.01344	>200	4	CH10_HUMAN 10 kDa heat shock protein, mitochondrial
P61619	SEC61A1	0.04759	0.00682	14.565	2	S61A1_HUMAN Protein transport protein Sec61 subunit alpha isoform 1
P61758	VBP1	very slow	0.0059	>200	2	PFD3_HUMAN Prefoldin subunit 3
P61769	B2M	0.15222	0.01741	4.55359	2	B2MG_HUMAN Beta-2-microglobulin
P61923	COPZ1	0.04452	0.02607	15.5693	1	COPZ1_HUMAN Coatomer subunit zeta-1
P61927	RPL37	0.07482	0.00876	9.2642	3	RL37_HUMAN 60S ribosomal protein L37
P61956	SUMO2	0.07082	0.02876	9.78745	1	SUMO2_HUMAN Small ubiquitin-related modifier 2
P61962	DCAF7	0.07901	0.01363	8.7729	2	DCAF7_HUMAN DDB1- and CUL4-associated factor 7
P61970	NUTF2	very slow	0.00798	>200	2	NTF2_HUMAN Nuclear transport factor 2
P61978-2	HNRNPK	0.01804	0.00894	38.4228	6	HNRPK_HUMAN Isoform 2 of Heterogeneous nuclear ribonucleoprotein K
P61981	YWHAG	0.03865	0.01054	17.934	3	1433G_HUMAN 14-3-3 protein gamma
P62072	TIMM10	0.04403	0.00153	15.7426	2	TIM10_HUMAN Mitochondrial import inner membrane translocase subunit Tim10
P62081	RPS7	0.11038	0.01716	6.27964	7	RS7_HUMAN 40S ribosomal protein S7
P62136-2	PPP1CA	0.03578	0.00461	19.3725	3	PP1A_HUMAN Isoform 2 of Serine/threonine-protein phosphatase PP1-alpha catalytic subunit
P62158	CALM1	0.05585	0.01482	12.4109	1	CALM_HUMAN Calmodulin
P62191	PSMC1	0.05105	0.01038	13.5778	3	PRS4_HUMAN 26S protease regulatory subunit 4
P62195	PSMC5	0.04313	0.00451	16.0711	4	PRS8_HUMAN 26S protease regulatory subunit 8
P62241	RPS8	0.04095	0.00818	16.9267	2	RS8_HUMAN 40S ribosomal protein S8
P62244	RPS15A	0.07827	0.01113	8.85585	2	RS15A_HUMAN 40S ribosomal protein S15a
P62249	RPS16	0.03083	0.01897	22.4829	5	RS16_HUMAN 40S ribosomal protein S16
P62256	UBE2H	very slow	0.00308	>200	3	UBE2H_HUMAN Ubiquitin-conjugating enzyme E2 H
P62258	YWHAE	0.0642	0.01287	10.7967	2	1433E_HUMAN 14-3-3 protein epsilon
P62263	RPS14	0.03275	0.00191	21.1648	2	RS14_HUMAN 40S ribosomal protein S14
P62269	RPS18	0.04758	0.00849	14.568	5	RS18_HUMAN 40S ribosomal protein S18
P62273	RPS29	0.00995	0.00222	69.663	1	RS29_HUMAN 40S ribosomal protein S29
P62277	RPS13	0.04873	0.00825	14.2242	4	RS13_HUMAN 40S ribosomal protein S13
P62280	RPS11	0.05882	0.01127	11.7842	4	RS11_HUMAN 40S ribosomal protein S11
P62304	SNRPE	0.05102	0.00797	13.5858	1	RUXE_HUMAN Small nuclear ribonucleoprotein E
P62306	SNRPF	0.03419	0.00601	20.2734	1	RUXF_HUMAN Small nuclear ribonucleoprotein F
P62312	LSM6	very slow	0.00503	>200	1	LSM6_HUMAN U6 snRNA-associated Sm-like protein LSm6
P62314	SNRPD1	very slow	0.01045	>200	1	SMD1_HUMAN Small nuclear ribonucleoprotein Sm D1
P62316	SNRPD2	0.06908	0.00815	10.034	6	SMD2_HUMAN Small nuclear ribonucleoprotein Sm D2
P62318	SNRPD3	0.07454	0.00669	9.299	3	SMD3_HUMAN Small nuclear ribonucleoprotein Sm D3
P62333	PSMC6	0.04874	0.01014	14.2213	6	PRS10_HUMAN 26S protease regulatory subunit 10B
P62424	RPL7A	0.13734	0.03185	5.04694	5	RL7A_HUMAN 60S ribosomal protein L7a
P62487	POLR2G	very slow	0.01002	>200	1	RPB7_HUMAN DNA-directed RNA polymerase II subunit RPB7
P62495	ETF1	0.02615	0.00856	26.5066	2	ERF1_HUMAN Eukaryotic peptide chain release factor subunit 1
P62701	RPS4X	0.06433	0.00941	10.7749	6	RS4X_HUMAN 40S ribosomal protein S4, X isoform
P62714	PPP2CB	0.02127	0.01162	32.588	1	PP2AB_HUMAN Serine/threonine-protein phosphatase 2A catalytic subunit beta isoform
P62736	ACTA2	0.0336	0.00633	20.6294	4	ACTA_HUMAN Actin, aortic smooth muscle
P62745	RHOB	0.04316	0.01114	16.0599	1	RHOB_HUMAN Rho-related GTP-binding protein RhoB
P62750	RPL23A	0.09489	0.01126	7.30474	6	RL23A_HUMAN 60S ribosomal protein L23a
P62753	RPS6	0.04465	0.00721	15.524	8	RS6_HUMAN 40S ribosomal protein S6
P62805	HIST1H4A	0.22361	0.03413	3.0998	3	H4_HUMAN Histone H4
P62820	RAB1A	0.07699	0.01323	9.00308	7	RAB1A_HUMAN Ras-related protein Rab-1A
P62826	RAN	0.01365	0.0039	50.78	3	RAN_HUMAN GTP-binding nuclear protein Ran
P62829	RPL23	0.02141	0.01219	32.3749	2	RL23_HUMAN 60S ribosomal protein L23
P62834	RAP1A	0.04414	0.0063	15.7034	3	RAP1A_HUMAN Ras-related protein Rap-1A
P62841	RPS15	0.03139	0.00539	22.0818	1	RS15_HUMAN 40S ribosomal protein S15
P62847-4	RPS24	0.04759	0.00883	14.565	2	RS24_HUMAN Isoform 4 of 40S ribosomal protein S24
P62851	RPS25	0.14282	0.02202	4.85329	4	RS25_HUMAN 40S ribosomal protein S25
P62861	FAU	0.05324	0.00918	13.0193	1	RS30_HUMAN 40S ribosomal protein S30
P62888	RPL30	0.09763	0.01237	7.09974	4	RL30_HUMAN 60S ribosomal protein L30
P62899-2	RPL31	0.0501	0.00763	13.8353	3	RL31_HUMAN Isoform 2 of 60S ribosomal protein L31
P62906	RPL10A	0.06377	0.014	10.8695	4	RL10A_HUMAN 60S ribosomal protein L10a
P62910	RPL32	0.0983	0.00874	7.05134	3	RL32_HUMAN 60S ribosomal protein L32
P62913	RPL11	0.0832	0.01487	8.3311	3	RL11_HUMAN 60S ribosomal protein L11
P62917	RPL8	0.10558	0.02149	6.56514	4	RL8_HUMAN 60S ribosomal protein L8
P62937	PPIA	0.02139	0.02162	32.4052	7	PPIA_HUMAN Peptidyl-prolyl cis-trans isomerase A
P62979	RPS27A	0.05566	0.0109	12.4532	1	RS27A_HUMAN Ubiquitin-40S ribosomal protein S27a
P62993	GRB2	0.03985	0.0134	17.3939	9	GRB2_HUMAN Growth factor receptor-bound protein 2
P63000-2	RAC1	0.00836	0.00449	82.9123	5	RAC1_HUMAN Isoform B of Ras-related C3 botulinum toxin substrate 1
P63010-2	AP2B1	0.018	0.00287	38.5082	10	AP2B1_HUMAN Isoform 2 of AP-2 complex subunit beta
P63092-4	GNAS	0.10459	0.0266	6.62728	1	GNAS2_HUMAN Isoform 4 of Guanine nucleotide-binding protein G(s) subunit alpha isoforms short
P63098	PPP3R1	0.03872	0.00773	17.9015	1	CANB1_HUMAN Calcineurin subunit B type 1
P63104	YWHAZ	very slow	0.00561	>200	7	1433Z_HUMAN 14-3-3 protein zeta/delta
P63151-2	PPP2R2A	0.02922	0.00434	23.7217	1	2ABA_HUMAN Isoform 2 of Serine/threonine-protein phosphatase 2A 55 kDa regulatory subunit B alpha isoform
P63165	SUMO1	0.05093	0.01241	13.6098	1	SUMO1_HUMAN Small ubiquitin-related modifier 1
P63167	DYNLL1	0.07435	0.01545	9.32276	1	DYL1_HUMAN Dynein light chain 1, cytoplasmic
P63208	SKP1	0.06626	0.01604	10.461	1	SKP1_HUMAN S-phase kinase-associated protein 1
P63218	GNG5	0.02973	0.00487	23.3147	2	GBG5_HUMAN Guanine nucleotide-binding protein G(I)/G(S)/G(O) subunit gamma-5
P63220	RPS21	0.08583	0.01223	8.07581	3	RS21_HUMAN 40S ribosomal protein S21
P63241-2	EIF5A	0.03409	0.00867	20.3329	4	IF5A1_HUMAN Isoform 2 of Eukaryotic translation initiation factor 5A-1
P63244	GNB2L1	0.03945	0.00975	17.5703	5	GBLP_HUMAN Guanine nucleotide-binding protein subunit beta-2-like 1
P63272	SUPT4H1	0.0798	0.00829	8.68605	1	SPT4H_HUMAN Transcription elongation factor SPT4
P63279	UBE2I	0.03549	0.01128	19.5308	4	UBC9_HUMAN SUMO-conjugating enzyme UBC9
P67775	PPP2CA	0.03306	0.00441	20.9663	1	PP2AA_HUMAN Serine/threonine-protein phosphatase 2A catalytic subunit alpha isoform
P67809	YBX1	very slow	0.00504	>200	1	YBOX1_HUMAN Nuclease-sensitive element-binding protein 1
P67812	SEC11A	0.06769	0.00704	10.24	1	SC11A_HUMAN Signal peptidase complex catalytic subunit SEC11A
P68036	UBE2L3	0.000862158	0.00216	>200	1	UB2L3_HUMAN Ubiquitin-conjugating enzyme E2 L3
P68036-3	UBE2L3	0.02646	0.01709	26.196	3	UB2L3_HUMAN Isoform 3 of Ubiquitin-conjugating enzyme E2 L3
P68363	TUBA1B	0.00399	0.01278	173.721	5	TBA1B_HUMAN Tubulin alpha-1B chain
P68371	TUBB4B	very slow	0.01082	>200	1	TBB4B_HUMAN Tubulin beta-4B chain
P68431	HIST1H3A	0.32338	0.07982	2.14344	4	H31_HUMAN Histone H3.1
P78312	FAM193A	0.01087	0.01435	63.767	1	F193A_HUMAN Protein FAM193A
P78316	NOP14	0.04884	0.00754	14.1922	8	NOP14_HUMAN Nucleolar protein 14
P78318	IGBP1	very slow	0.02678	>200	1	IGBP1_HUMAN Immunoglobulin-binding protein 1
P78332	RBM6	0.03488	0.00435	19.8723	5	RBM6_HUMAN RNA-binding protein 6
P78344	EIF4G2	0.01793	0.01022	38.6585	15	IF4G2_HUMAN Eukaryotic translation initiation factor 4 gamma 2
P78347	GTF2I	0.02899	0.00312	23.9099	18	GTF2I_HUMAN General transcription factor II-I
P78371	CCT2	0.04994	0.00987	13.8796	9	TCPB_HUMAN T-complex protein 1 subunit beta
P78383	SLC35B1	0.03167	0.00566	21.8866	1	S35B1_HUMAN Solute carrier family 35 member B1
P78406	RAE1	0.04677	0.01187	14.8203	6	RAE1L_HUMAN mRNA export factor
P78411	IRX5	0.05013	0.01157	13.827	1	IRX5_HUMAN Iroquois-class homeodomain protein IRX-5
P78413	IRX4	0.06928	0.01266	10.005	2	IRX4_HUMAN Iroquois-class homeodomain protein IRX-4
P78417	GSTO1	0.01479	0.01071	46.8659	5	GSTO1_HUMAN Glutathione S-transferase omega-1
P78527	PRKDC	0.04262	0.00778	16.2634	4	PRKDC_HUMAN DNA-dependent protein kinase catalytic subunit
P80404	ABAT	0.07312	0.01395	9.47958	1	GABT_HUMAN 4-aminobutyrate aminotransferase, mitochondrial
P81274	GPSM2	0.02662	0.00581	26.0386	3	GPSM2_HUMAN G-protein-signaling modulator 2
P82650	MRPS22	0.07331	0.0065	9.45502	3	RT22_HUMAN 28S ribosomal protein S22, mitochondrial
P82663	MRPS25	0.10094	0.00745	6.86692	1	RT25_HUMAN 28S ribosomal protein S25, mitochondrial
P82673	MRPS35	0.12713	0.01475	5.45227	5	RT35_HUMAN 28S ribosomal protein S35, mitochondrial
P82675	MRPS5	0.04012	0.00804	17.2768	1	RT05_HUMAN 28S ribosomal protein S5, mitochondrial
P82914	MRPS15	0.11896	0.01009	5.82672	1	RT15_HUMAN 28S ribosomal protein S15, mitochondrial
P82930	MRPS34	0.10167	0.00716	6.81762	1	RT34_HUMAN 28S ribosomal protein S34, mitochondrial
P82933	MRPS9	0.03703	0.00533	18.7185	4	RT09_HUMAN 28S ribosomal protein S9, mitochondrial
P82979	SARNP	0.0126	0.01141	55.0117	5	SARNP_HUMAN SAP domain-containing ribonucleoprotein
P83111	LACTB	0.09251	0.00455	7.49267	2	LACTB_HUMAN Serine beta-lactamase-like protein LACTB, mitochondrial
P83436	COG7	0.04446	0.00906	15.5904	2	COG7_HUMAN Conserved oligomeric Golgi complex subunit 7
P83731	RPL24	0.05201	0.01467	13.3272	5	RL24_HUMAN 60S ribosomal protein L24
P83881	RPL36A	0.06217	0.00741	11.1492	3	RL36A_HUMAN 60S ribosomal protein L36a
P84022	SMAD3	0.01391	0.00534	49.8309	1	SMAD3_HUMAN Mothers against decapentaplegic homolog 3
P84090	ERH	0.01356	0.00644	51.117	3	ERH_HUMAN Enhancer of rudimentary homolog
P84095	RHOG	0.00389	0.01174	178.187	1	RHOG_HUMAN Rho-related GTP-binding protein RhoG
P84098	RPL19	0.05983	0.01048	11.5853	3	RL19_HUMAN 60S ribosomal protein L19
P84101	SERF2	0.06941	0.01581	9.98627	1	SERF2_HUMAN Small EDRK-rich factor 2
P84101-2	SERF2	0.06706	0.00978	10.3362	2	SERF2_HUMAN Isoform 2 of Small EDRK-rich factor 2
P84103	SRSF3	0.01028	0.0079	67.4268	1	SRSF3_HUMAN Serine/arginine-rich splicing factor 3
P84243	H3F3A	0.80481	0.14359	0.861256	1	H33_HUMAN Histone H3.3
P85037	FOXK1	0.01482	0.00511	46.7711	4	FOXK1_HUMAN Forkhead box protein K1
P98175	RBM10	0.0025	0.0043	>200	5	RBM10_HUMAN RNA-binding protein 10
P99999	CYCS	0.00466	0.00565	148.744	5	CYC_HUMAN Cytochrome c
Q00005-7	PPP2R2B	0.03329	0.00936	20.8215	1	2ABB_HUMAN Isoform 7 of Serine/threonine-protein phosphatase 2A 55 kDa regulatory subunit B beta isoform
Q00059	TFAM	0.02738	0.00922	25.3158	6	TFAM_HUMAN Transcription factor A, mitochondrial
Q00169	PITPNA	0.03185	0.0099	21.7629	1	PIPNA_HUMAN Phosphatidylinositol transfer protein alpha isoform
Q00266	MAT1A	0.03823	0.00682	18.131	2	METK1_HUMAN S-adenosylmethionine synthase isoform type-1
Q00325	SLC25A3	0.01214	0.00655	57.0961	5	MPCP_HUMAN Phosphate carrier protein, mitochondrial
Q00341	HDLBP	0.03527	0.00739	19.6526	19	VIGLN_HUMAN Vigilin
Q00526	CDK3	0.04253	0.00779	16.2978	1	CDK3_HUMAN Cyclin-dependent kinase 3
Q00535	CDK5	0.00562	0.00435	123.336	1	CDK5_HUMAN Cyclin-dependent kinase 5
Q00610	CLTC	0.07635	0.01271	9.07855	12	CLH1_HUMAN Clathrin heavy chain 1
Q00613	HSF1	0.02633	0.00192	26.3254	2	HSF1_HUMAN Heat shock factor protein 1
Q00653	NFKB2	0.0593	0.01177	11.6888	1	NFKB2_HUMAN Nuclear factor NF-kappa-B p100 subunit
Q00688	FKBP3	0.01276	0.00561	54.3219	5	FKBP3_HUMAN Peptidyl-prolyl cis-trans isomerase FKBP3
Q00765	REEP5	very slow	0.00955	>200	4	REEP5_HUMAN Receptor expression-enhancing protein 5
Q00839	HNRNPU	0.02989	0.00399	23.1899	20	HNRPU_HUMAN Heterogeneous nuclear ribonucleoprotein U
Q00978	IRF9	0.13526	0.01396	5.12455	1	IRF9_HUMAN Interferon regulatory factor 9
Q01081	U2AF1	0.08044	0.01858	8.61695	1	U2AF1_HUMAN Splicing factor U2AF 35 kDa subunit
Q01082	SPTBN1	0.0042	0.01053	165.035	11	SPTB2_HUMAN Spectrin beta chain, non-erythrocytic 1
Q01085-2	TIAL1	0.03369	0.00783	20.5743	4	TIAR_HUMAN Isoform 2 of Nucleolysin TIAR
Q01518	CAP1	0.02453	0.0031	28.2571	11	CAP1_HUMAN Adenylyl cyclase-associated protein 1
Q01581	HMGCS1	0.02407	0.00918	28.7971	2	HMCS1_HUMAN Hydroxymethylglutaryl-CoA synthase, cytoplasmic
Q01628	IFITM3	0.07895	0.00529	8.77957	1	IFM3_HUMAN Interferon-induced transmembrane protein 3
Q01650	SLC7A5	0.06612	0.01483	10.4832	1	LAT1_HUMAN Large neutral amino acids transporter small subunit 1
Q01780	EXOSC10	0.04225	0.00679	16.4059	4	EXOSX_HUMAN Exosome component 10
Q01813	PFKP	0.02357	0.0027	29.408	2	K6PP_HUMAN 6-phosphofructokinase type C
Q01844-5	EWSR1	0.03191	0.01182	21.7219	6	EWS_HUMAN Isoform 5 of RNA-binding protein EWS
Q01995	TAGLN	0.03642	0.00719	19.032	1	TAGL_HUMAN Transgelin
Q02086	SP2	0.00418	0.00553	165.825	2	SP2_HUMAN Transcription factor Sp2
Q02218	OGDH	0.06578	0.01337	10.5374	2	ODO1_HUMAN 2-oxoglutarate dehydrogenase, mitochondrial
Q02224	CENPE	0.02021	0.03014	34.2972	1	CENPE_HUMAN Centromere-associated protein E
Q02241	KIF23	0.03712	0.00323	18.6731	12	KIF23_HUMAN Kinesin-like protein KIF23
Q02252	ALDH6A1	0.068	0.00792	10.1933	3	MMSA_HUMAN Methylmalonate-semialdehyde dehydrogenase [acylating], mitochondrial
Q02338	BDH1	0.06053	0.00664	11.4513	1	BDH_HUMAN D-beta-hydroxybutyrate dehydrogenase, mitochondrial
Q02388	COL7A1	very slow	0.00679	>200	1	CO7A1_HUMAN Collagen alpha-1(VII) chain
Q02543	RPL18A	0.00859	0.00332	80.6923	3	RL18A_HUMAN 60S ribosomal protein L18a
Q02750	MAP2K1	0.03606	0.02309	19.2221	1	MP2K1_HUMAN Dual specificity mitogen-activated protein kinase kinase 1
Q02790	FKBP4	0.02436	0.0087	28.4543	14	FKBP4_HUMAN Peptidyl-prolyl cis-trans isomerase FKBP4
Q02878	RPL6	0.01084	0.00342	63.9435	5	RL6_HUMAN 60S ribosomal protein L6
Q02880	TOP2B	0.01806	0.00875	38.3802	1	TOP2B_HUMAN DNA topoisomerase 2-beta
Q03001	DST	0.01266	0.00596	54.751	1	DYST_HUMAN Dystonin
Q03112-3	MECOM	0.04085	0.00425	16.9681	1	EVI1_HUMAN Isoform 2 of MDS1 and EVI1 complex locus protein EVI1
Q03113	GNA12	0.03002	0.01009	23.0895	1	GNA12_HUMAN Guanine nucleotide-binding protein subunit alpha-12
Q03519	TAP2	0.06357	0.0111	10.9037	1	TAP2_HUMAN Antigen peptide transporter 2
Q03701	CEBPZ	0.00757	0.00685	91.565	2	CEBPZ_HUMAN CCAAT/enhancer-binding protein zeta
Q04637-9	EIF4G1	0.03479	0.01249	19.9237	14	IF4G1_HUMAN Isoform 9 of Eukaryotic translation initiation factor 4 gamma 1
Q04724	TLE1	0.01191	0.00856	58.1988	1	TLE1_HUMAN Transducin-like enhancer protein 1
Q04837	SSBP1	0.00171	0.01284	>200	1	SSBP_HUMAN Single-stranded DNA-binding protein, mitochondrial
Q04917	YWHAH	0.0516	0.01065	13.4331	4	1433F_HUMAN 14-3-3 protein eta
Q05048	CSTF1	0.01204	0.00374	57.5704	2	CSTF1_HUMAN Cleavage stimulation factor subunit 1
Q05084-2	ICA1	0.02044	0.00766	33.9113	2	ICA69_HUMAN Isoform 2 of Islet cell autoantigen 1
Q05193	DNM1	0.00937	0.00272	73.9752	3	DYN1_HUMAN Dynamin-1
Q05209	PTPN12	very slow	0.0064	>200	1	PTN12_HUMAN Tyrosine-protein phosphatase non-receptor type 12
Q05481	ZNF91	0.06211	0.01387	11.16	2	ZNF91_HUMAN Zinc finger protein 91
Q05519	SRSF11	0.0412	0.00608	16.824	1	SRS11_HUMAN Serine/arginine-rich splicing factor 11
Q05639	EEF1A2	0.09138	0.01349	7.58533	13	EF1A2_HUMAN Elongation factor 1-alpha 2
Q05655-2	PRKCD	0.04042	0.01665	17.1486	11	KPCD_HUMAN Isoform 2 of Protein kinase C delta type
Q06323-2	PSME1	0.05831	0.00741	11.8873	4	PSME1_HUMAN Isoform 2 of Proteasome activator complex subunit 1
Q06546	GABPA	0.03497	0.00719	19.8212	1	GABPA_HUMAN GA-binding protein alpha chain
Q06587	RING1	0.02862	0.00669	24.219	1	RING1_HUMAN E3 ubiquitin-protein ligase RING1
Q06830	PRDX1	0.01502	0.00912	46.1483	7	PRDX1_HUMAN Peroxiredoxin-1
Q07020	RPL18	0.06105	0.01216	11.3538	1	RL18_HUMAN 60S ribosomal protein L18
Q07157	TJP1	0.03175	0.01056	21.8314	2	ZO1_HUMAN Tight junction protein ZO-1
Q07617	SPAG1	very slow	0.01276	>200	2	SPAG1_HUMAN Sperm-associated antigen 1
Q07666	KHDRBS1	very slow	0.00797	>200	9	KHDR1_HUMAN KH domain-containing, RNA-binding, signal transduction-associated protein 1
Q07820	MCL1	0.13472	0.01905	5.14509	2	MCL1_HUMAN Induced myeloid leukemia cell differentiation protein Mcl-1
Q07866-9	KLC1	0.03191	0.00898	21.7219	6	KLC1_HUMAN Isoform I of Kinesin light chain 1
Q07889	SOS1	0.02044	0.00344	33.9113	1	SOS1_HUMAN Son of sevenless homolog 1
Q07955-2	SRSF1	very slow	0.00703	>200	3	SRSF1_HUMAN Isoform ASF-2 of Serine/arginine-rich splicing factor 1
Q07960	ARHGAP1	0.01422	0.00344	48.7445	3	RHG01_HUMAN Rho GTPase-activating protein 1
Q08117-2	AES	0.08161	0.01363	8.49341	1	AES_HUMAN Isoform 2 of Amino-terminal enhancer of split
Q08170	SRSF4	0.00724	0.00792	95.7386	1	SRSF4_HUMAN Serine/arginine-rich splicing factor 4
Q08209	PPP3CA	0.00371	0.00278	186.832	2	PP2BA_HUMAN Serine/threonine-protein phosphatase 2B catalytic subunit alpha isoform
Q08209-2	PPP3CA	0.0088	0.00518	78.7667	1	PP2BA_HUMAN Isoform 2 of Serine/threonine-protein phosphatase 2B catalytic subunit alpha isoform
Q08211	DHX9	very slow	0.0095	>200	14	DHX9_HUMAN ATP-dependent RNA helicase A
Q08345-5	DDR1	0.13233	0.02072	5.23802	1	DDR1_HUMAN Isoform 4 of Epithelial discoidin domain-containing receptor 1
Q08379	GOLGA2	0.00649	0.01036	106.802	2	GOGA2_HUMAN Golgin subfamily A member 2
Q08623-4	HDHD1	very slow	0.00413	>200	2	HDHD1_HUMAN Isoform 4 of Pseudouridine-5'-monophosphatase
Q08722	CD47	0.01393	0.00756	49.7593	2	CD47_HUMAN Leukocyte surface antigen CD47
Q08752	PPID	0.02304	0.00489	30.0845	7	PPID_HUMAN Peptidyl-prolyl cis-trans isomerase D
Q08AD1	CAMSAP2	0.03159	0.00717	21.942	8	CAMP2_HUMAN Calmodulin-regulated spectrin-associated protein 2
Q08AF3	SLFN5	0.02457	0.00817	28.2111	2	SLFN5_HUMAN Schlafen family member 5
Q08J23	NSUN2	0.03724	0.00533	18.613	5	NSUN2_HUMAN tRNA (cytosine(34)-C(5))-methyltransferase
Q09161	NCBP1	0.02759	0.0035	25.1231	4	NCBP1_HUMAN Nuclear cap-binding protein subunit 1
Q09328	MGAT5	0.0566	0.01155	12.2464	1	MGT5A_HUMAN Alpha-1,6-mannosylglycoprotein 6-beta-N-acetylglucosaminyltransferase A
Q09666	AHNAK	0.02405	0.01193	28.8211	11	AHNK_HUMAN Neuroblast differentiation-associated protein AHNAK
Q10471	GALNT2	0.02948	0.00336	23.5125	1	GALT2_HUMAN Polypeptide N-acetylgalactosaminyltransferase 2
Q10713	PMPCA	0.03937	0.00861	17.606	2	MPPA_HUMAN Mitochondrial-processing peptidase subunit alpha
Q11201	ST3GAL1	0.01459	0.00956	47.5084	2	SIA4A_HUMAN CMP-N-acetylneuraminate-beta-galactosamide-alpha-2,3-sialyltransferase 1
Q11206-4	ST3GAL4	very slow	0.01673	>200	1	SIA4C_HUMAN Isoform 4 of CMP-N-acetylneuraminate-beta-galactosamide-alpha-2,3-sialyltransferase 4
Q12792-3	TWF1	0.0566	0.01625	12.2464	1	TWF1_HUMAN Isoform 3 of Twinfilin-1
Q12797	ASPH	0.05724	0.01735	12.1095	3	ASPH_HUMAN Aspartyl/asparaginyl beta-hydroxylase
Q12802-2	AKAP13	0.01805	0.00729	38.4015	1	AKP13_HUMAN Isoform 2 of A-kinase anchor protein 13
Q12816	TRO	0.03702	0.00317	18.7236	1	TROP_HUMAN Trophinin
Q12824	SMARCB1	0.03511	0.00571	19.7422	1	SNF5_HUMAN SWI/SNF-related matrix-associated actin-dependent regulator of chromatin subfamily B member 1
Q12830	BPTF	very slow	0.01661	>200	3	BPTF_HUMAN Nucleosome-remodeling factor subunit BPTF
Q12834	CDC20	0.11845	0.0123	5.85181	3	CDC20_HUMAN Cell division cycle protein 20 homolog
Q12846	STX4	0.04051	0.00267	17.1105	1	STX4_HUMAN Syntaxin-4
Q12849	GRSF1	0.05328	0.00811	13.0095	2	GRSF1_HUMAN G-rich sequence factor 1
Q12857-4	NFIA	0.03866	0.01164	17.9293	1	NFIA_HUMAN Isoform 4 of Nuclear factor 1 A-type
Q12872-2	SFSWAP	0.01301	0.01053	53.278	1	SFSWA_HUMAN Isoform 2 of Splicing factor, suppressor of white-apricot homolog
Q12873-3	CHD3	0.03305	0.00812	20.9727	2	CHD3_HUMAN Isoform 3 of Chromodomain-helicase-DNA-binding protein 3
Q12874	SF3A3	0.02116	0.00538	32.7574	4	SF3A3_HUMAN Splicing factor 3A subunit 3
Q12882	DPYD	0.03387	0.00449	20.4649	1	DPYD_HUMAN Dihydropyrimidine dehydrogenase [NADP(+)]
Q12904-2	AIMP1	0.03133	0.00929	22.1241	3	AIMP1_HUMAN Isoform 2 of Aminoacyl tRNA synthase complex-interacting multifunctional protein 1
Q12905	ILF2	0.06864	0.01312	10.0983	3	ILF2_HUMAN Interleukin enhancer-binding factor 2
Q12906-7	ILF3	0.02804	0.00411	24.7199	14	ILF3_HUMAN Isoform 7 of Interleukin enhancer-binding factor 3
Q12929	EPS8	0.01281	0.00651	54.1099	2	EPS8_HUMAN Epidermal growth factor receptor kinase substrate 8
Q12931	TRAP1	0.06761	0.01313	10.2521	6	TRAP1_HUMAN Heat shock protein 75 kDa, mitochondrial
Q12948	FOXC1	0.09239	0.00523	7.5024	1	FOXC1_HUMAN Forkhead box protein C1
Q12972	PPP1R8	0.02184	0.00774	31.7375	1	PP1R8_HUMAN Nuclear inhibitor of protein phosphatase 1
Q12979	ABR	0.02765	0.00987	25.0686	1	ABR_HUMAN Active breakpoint cluster region-related protein
Q12983	BNIP3	0.11839	0.01599	5.85478	1	BNIP3_HUMAN BCL2/adenovirus E1B 19 kDa protein-interacting protein 3
Q12986	NFX1	0.00813	0.00837	85.258	1	NFX1_HUMAN Transcriptional repressor NF-X1
Q12996	CSTF3	very slow	0.01399	>200	1	CSTF3_HUMAN Cleavage stimulation factor subunit 3
Q12999	TSPAN31	0.01888	0.01621	36.7133	1	TSN31_HUMAN Tetraspanin-31
Q13011	ECH1	0.06491	0.00801	10.6786	6	ECH1_HUMAN Delta(3,5)-Delta(2,4)-dienoyl-CoA isomerase, mitochondrial
Q13084	MRPL28	0.15143	0.00995	4.57734	1	RM28_HUMAN 39S ribosomal protein L28, mitochondrial
Q13107	USP4	0.02826	0.00653	24.5275	1	UBP4_HUMAN Ubiquitin carboxyl-terminal hydrolase 4
Q13112	CHAF1B	0.06777	0.01656	10.2279	1	CAF1B_HUMAN Chromatin assembly factor 1 subunit B
Q13118	KLF10	0.31488	0.07371	2.20131	1	KLF10_HUMAN Krueppel-like factor 10
Q13123	IK	0.0503	0.00562	13.7803	9	RED_HUMAN Protein Red
Q13127	REST	0.12971	0.01683	5.34382	2	REST_HUMAN RE1-silencing transcription factor
Q13131-2	PRKAA1	very slow	0.00687	>200	1	AAPK1_HUMAN Isoform 2 of 5'-AMP-activated protein kinase catalytic subunit alpha-1
Q13136	PPFIA1	0.01424	0.00633	48.6761	2	LIPA1_HUMAN Liprin-alpha-1
Q13144	EIF2B5	0.02626	0.01304	26.3956	1	EI2BE_HUMAN Translation initiation factor eIF-2B subunit epsilon
Q13148	TARDBP	0.05002	0.00933	13.8574	4	TADBP_HUMAN TAR DNA-binding protein 43
Q13151	HNRNPA0	0.0094	0.00857	73.7391	1	ROA0_HUMAN Heterogeneous nuclear ribonucleoprotein A0
Q13155	AIMP2	0.04819	0.00827	14.3836	3	AIMP2_HUMAN Aminoacyl tRNA synthase complex-interacting multifunctional protein 2
Q13158	FADD	0.01109	0.00638	62.502	1	FADD_HUMAN Protein FADD
Q13177	PAK2	0.01404	0.00784	49.3695	7	PAK2_HUMAN Serine/threonine-protein kinase PAK 2
Q13185	CBX3	0.01301	0.01058	53.278	3	CBX3_HUMAN Chromobox protein homolog 3
Q13188	STK3	0.00353	0.00934	196.359	1	STK3_HUMAN Serine/threonine-protein kinase 3
Q13190	STX5	0.05321	0.0151	13.0266	5	STX5_HUMAN Syntaxin-5
Q13191	CBLB	0.01871	0.00961	37.0469	3	CBLB_HUMAN E3 ubiquitin-protein ligase CBL-B
Q13200	PSMD2	0.02481	0.00787	27.9382	2	PSMD2_HUMAN 26S proteasome non-ATPase regulatory subunit 2
Q13207	TBX2	0.04639	0.00731	14.9417	2	TBX2_HUMAN T-box transcription factor TBX2
Q13217	DNAJC3	0.04747	0.01217	14.6018	8	DNJC3_HUMAN DnaJ homolog subfamily C member 3
Q13242	SRSF9	0.02397	0.00649	28.9173	1	SRSF9_HUMAN Serine/arginine-rich splicing factor 9
Q13243	SRSF5	0.0532	0.00302	13.0291	4	SRSF5_HUMAN Serine/arginine-rich splicing factor 5
Q13247	SRSF6	very slow	0.00995	>200	2	SRSF6_HUMAN Serine/arginine-rich splicing factor 6
Q13263	TRIM28	0.03298	0.00617	21.0172	12	TIF1B_HUMAN Transcription intermediary factor 1-beta
Q13283	G3BP1	0.04916	0.02	14.0998	2	G3BP1_HUMAN Ras GTPase-activating protein-binding protein 1
Q13310-3	PABPC4	0.04207	0.00265	16.476	9	PABP4_HUMAN Isoform 3 of Polyadenylate-binding protein 4
Q13325	IFIT5	very slow	0.00346	>200	2	IFIT5_HUMAN Interferon-induced protein with tetratricopeptide repeats 5
Q13330	MTA1	0.08577	0.01589	8.08146	2	MTA1_HUMAN Metastasis-associated protein MTA1
Q13347	EIF3I	0.04317	0.00663	16.0562	3	EIF3I_HUMAN Eukaryotic translation initiation factor 3 subunit I
Q13356-2	PPIL2	0.04592	0.007	15.0947	5	PPIL2_HUMAN Isoform 2 of Peptidyl-prolyl cis-trans isomerase-like 2
Q13362-2	PPP2R5C	0.01404	0.0049	49.3695	1	2A5G_HUMAN Isoform Gamma-1 of Serine/threonine-protein phosphatase 2A 56 kDa regulatory subunit gamma isoform
Q13362-4	PPP2R5C	0.03976	0.00469	17.4333	1	2A5G_HUMAN Isoform 4 of Serine/threonine-protein phosphatase 2A 56 kDa regulatory subunit gamma isoform
Q13362-5	PPP2R5C	0.00412	0.0023	168.24	5	2A5G_HUMAN Isoform 5 of Serine/threonine-protein phosphatase 2A 56 kDa regulatory subunit gamma isoform
Q13363	CTBP1	0.04289	0.00454	16.161	1	CTBP1_HUMAN C-terminal-binding protein 1
Q13404-1	UBE2V1	0.03095	0.02157	22.3957	5	UB2V1_HUMAN Isoform 1 of Ubiquitin-conjugating enzyme E2 variant 1
Q13405	MRPL49	0.06689	0.00644	10.3625	2	RM49_HUMAN 39S ribosomal protein L49, mitochondrial
Q13409	DYNC1I2	0.01263	0.00617	54.881	1	DC1I2_HUMAN Cytoplasmic dynein 1 intermediate chain 2
Q13416	ORC2	0.02983	0.0037	23.2366	2	ORC2_HUMAN Origin recognition complex subunit 2
Q13418	ILK	0.06112	0.00876	11.3408	2	ILK_HUMAN Integrin-linked protein kinase
Q13423	NNT	0.02841	0.00905	24.398	1	NNTM_HUMAN NAD(P) transhydrogenase, mitochondrial
Q13428-4	TCOF1	0.0201	0.00778	34.4849	1	TCOF_HUMAN Isoform 4 of Treacle protein
Q13435	SF3B2	0.06184	0.01321	11.2087	17	SF3B2_HUMAN Splicing factor 3B subunit 2
Q13439-5	GOLGA4	0.02186	0.00528	31.7085	14	GOGA4_HUMAN Isoform 5 of Golgin subfamily A member 4
Q13442	PDAP1	0.02005	0.00634	34.5709	8	HAP28_HUMAN 28 kDa heat- and acid-stable phosphoprotein
Q13445	TMED1	0.01776	0.0057	39.0286	2	TMED1_HUMAN Transmembrane emp24 domain-containing protein 1
Q13451	FKBP5	0.01909	0.00728	36.3094	3	FKBP5_HUMAN Peptidyl-prolyl cis-trans isomerase FKBP5
Q13492	PICALM	0.0355	0.00495	19.5253	8	PICAL_HUMAN Phosphatidylinositol-binding clathrin assembly protein
Q13496	MTM1	0.00719	0.01024	96.4043	1	MTM1_HUMAN Myotubularin
Q13501	SQSTM1	0.09174	0.00706	7.55556	4	SQSTM_HUMAN Sequestosome-1
Q13505	MTX1	0.04128	0.01597	16.7914	3	MTX1_HUMAN Metaxin-1
Q13523	PRPF4B	0.00831	0.01005	83.4112	1	PRP4B_HUMAN Serine/threonine-protein kinase PRP4 homolog
Q13526	PIN1	0.00491	0.00385	141.171	1	PIN1_HUMAN Peptidyl-prolyl cis-trans isomerase NIMA-interacting 1
Q13530	SERINC3	0.09564	0.00856	7.24746	2	SERC3_HUMAN Serine incorporator 3
Q13547	HDAC1	0.07343	0.01311	9.43956	3	HDAC1_HUMAN Histone deacetylase 1
Q13557-11	CAMK2D	0.06411	0.01347	10.8118	1	KCC2D_HUMAN Isoform Delta 11 of Calcium/calmodulin-dependent protein kinase type II subunit delta
Q13564	NAE1	0.06152	0.00603	11.267	1	ULA1_HUMAN NEDD8-activating enzyme E1 regulatory subunit
Q13569	TDG	0.06014	0.0102	11.5256	3	TDG_HUMAN G/T mismatch-specific thymine DNA glycosylase
Q13572	ITPK1	very slow	0.01815	>200	3	ITPK1_HUMAN Inositol-tetrakisphosphate 1-kinase
Q13573	SNW1	0.01534	0.0068	45.1856	10	SNW1_HUMAN SNW domain-containing protein 1
Q13595	TRA2A	0.03164	0.0078	21.9073	1	TRA2A_HUMAN Transformer-2 protein homolog alpha
Q13596-3	SNX1	0.02661	0.00421	26.0484	7	SNX1_HUMAN Isoform 3 of Sorting nexin-1
Q13601	KRR1	0.02535	0.00548	27.3431	3	KRR1_HUMAN KRR1 small subunit processome component homolog
Q13616	CUL1	0.04479	0.01061	15.4755	5	CUL1_HUMAN Cullin-1
Q13617-2	CUL2	0.01182	0.00759	58.6419	1	CUL2_HUMAN Isoform 2 of Cullin-2
Q13618	CUL3	0.01665	0.00376	41.6305	11	CUL3_HUMAN Cullin-3
Q13619	CUL4A	0.02246	0.00626	30.8614	2	CUL4A_HUMAN Cullin-4A
Q13620	CUL4B	0.01634	0.00354	42.4203	4	CUL4B_HUMAN Cullin-4B
Q13625-3	TP53BP2	0.000675633	0.00683	>200	1	ASPP2_HUMAN Isoform 3 of Apoptosis-stimulating of p53 protein 2
Q13636	RAB31	0.0415	0.00411	16.7023	2	RAB31_HUMAN Ras-related protein Rab-31
Q13637	RAB32	0.02663	0.00769	26.0288	2	RAB32_HUMAN Ras-related protein Rab-32
Q13765-2	NACA	0.01603	0.00767	43.2406	4	NACA_HUMAN Isoform 2 of Nascent polypeptide-associated complex subunit alpha
Q13796	SHROOM2	0.00476	0.00952	145.619	1	SHRM2_HUMAN Protein Shroom2
Q13813-2	SPTAN1	0.06321	0.00835	10.9658	8	SPTN1_HUMAN Isoform 2 of Spectrin alpha chain, non-erythrocytic 1
Q13838-2	DDX39B	0.05019	0.00254	13.8105	6	DX39B_HUMAN Isoform 2 of Spliceosome RNA helicase DDX39B
Q13885	TUBB2A	0.01223	0.0028	56.676	2	TBB2A_HUMAN Tubulin beta-2A chain
Q13895	BYSL	0.05939	0.00712	11.6711	2	BYST_HUMAN Bystin
Q13901	C1D	0.03994	0.00325	17.3547	1	C1D_HUMAN Nuclear nucleic acid-binding protein C1D
Q13907-2	IDI1	0.02235	0.00441	31.0133	7	IDI1_HUMAN Isoform 2 of Isopentenyl-diphosphate Delta-isomerase 1
Q13936-2	CACNA1C	0.03188	0.01146	21.7424	1	CAC1C_HUMAN Isoform 2 of Voltage-dependent L-type calcium channel subunit alpha-1C
Q13948	CUX1	0.01807	0.0069	38.359	2	CASP_HUMAN Protein CASP
Q14004	CDK13	0.02059	0.00904	33.6643	1	CDK13_HUMAN Cyclin-dependent kinase 13
Q14008-3	CKAP5	0.01637	0.00614	42.3425	21	CKAP5_HUMAN Isoform 3 of Cytoskeleton-associated protein 5
Q14011	CIRBP	0.05539	0.00169	12.5139	2	CIRBP_HUMAN Cold-inducible RNA-binding protein
Q14061	COX17	0.0738	0.01304	9.39224	1	COX17_HUMAN Cytochrome c oxidase copper chaperone
Q14103	HNRNPD	0.03287	0.0049	21.0875	8	HNRPD_HUMAN Heterogeneous nuclear ribonucleoprotein D0
Q14103-3	HNRNPD	0.46889	0.10229	1.47827	1	HNRPD_HUMAN Isoform 3 of Heterogeneous nuclear ribonucleoprotein D0
Q14119	VEZF1	0.03795	0.00819	18.2647	4	VEZF1_HUMAN Vascular endothelial zinc finger 1
Q14139-2	UBE4A	0.04483	0.00759	15.4617	2	UBE4A_HUMAN Isoform 2 of Ubiquitin conjugation factor E4 A
Q14151	SAFB2	0.02108	0.00949	32.8817	2	SAFB2_HUMAN Scaffold attachment factor B2
Q14152	EIF3A	0.01981	0.00184	34.9898	16	EIF3A_HUMAN Eukaryotic translation initiation factor 3 subunit A
Q14157-5	UBAP2L	0.00893	0.00735	77.6201	3	UBP2L_HUMAN Isoform 5 of Ubiquitin-associated protein 2-like
Q14161	GIT2	0.03831	0.00724	18.0931	1	GIT2_HUMAN ARF GTPase-activating protein GIT2
Q14165	MLEC	0.01831	0.00865	37.8562	4	MLEC_HUMAN Malectin
Q14166	TTLL12	very slow	0.01358	>200	1	TTL12_HUMAN Tubulin--tyrosine ligase-like protein 12
Q14192	FHL2	0.033	0.00516	21.0045	1	FHL2_HUMAN Four and a half LIM domains protein 2
Q14197	ICT1	0.0689	0.00933	10.0602	2	ICT1_HUMAN Peptidyl-tRNA hydrolase ICT1, mitochondrial
Q14203	DCTN1	0.05645	0.01014	12.279	11	DCTN1_HUMAN Dynactin subunit 1
Q14204	DYNC1H1	0.04264	0.00649	16.2558	6	DYHC1_HUMAN Cytoplasmic dynein 1 heavy chain 1
Q14232	EIF2B1	0.01173	0.0029	59.0918	2	EI2BA_HUMAN Translation initiation factor eIF-2B subunit alpha
Q14240-2	EIF4A2	0.03601	0.01545	19.2487	2	IF4A2_HUMAN Isoform 2 of Eukaryotic initiation factor 4A-II
Q14241	TCEB3	0.0121	0.00133	57.2849	6	ELOA1_HUMAN Transcription elongation factor B polypeptide 3
Q14244-7	MAP7	0.01933	0.00636	35.8586	4	MAP7_HUMAN Isoform 7 of Ensconsin
Q14247-2	CTTN	0.02707	0.00723	25.6057	5	SRC8_HUMAN Isoform 2 of Src substrate cortactin
Q14258	TRIM25	0.02185	0.00643	31.723	4	TRI25_HUMAN E3 ubiquitin/ISG15 ligase TRIM25
Q14315	FLNC	0.04619	0.00438	15.0064	8	FLNC_HUMAN Filamin-C
Q14318-2	FKBP8	0.03558	0.00816	19.4814	5	FKBP8_HUMAN Isoform 2 of Peptidyl-prolyl cis-trans isomerase FKBP8
Q14320	FAM50A	0.02662	0.00224	26.0386	9	FA50A_HUMAN Protein FAM50A
Q14344	GNA13	0.02485	0.00361	27.8932	4	GNA13_HUMAN Guanine nucleotide-binding protein subunit alpha-13
Q14435	GALNT3	0.02565	0.00559	27.0233	2	GALT3_HUMAN Polypeptide N-acetylgalactosaminyltransferase 3
Q14444	CAPRIN1	0.03323	0.00596	20.8591	6	CAPR1_HUMAN Caprin-1
Q14469	HES1	0.13989	0.0196	4.95494	1	HES1_HUMAN Transcription factor HES-1
Q14493	SLBP	0.07941	0.00972	8.72871	4	SLBP_HUMAN Histone RNA hairpin-binding protein
Q14498	RBM39	0.01524	0.0063	45.4821	2	RBM39_HUMAN RNA-binding protein 39
Q14527	HLTF	0.04116	0.00659	16.8403	8	HLTF_HUMAN Helicase-like transcription factor
Q14534	SQLE	0.05128	0.00855	13.5169	7	ERG1_HUMAN Squalene monooxygenase
Q14554	PDIA5	0.02468	0.0065	28.0854	1	PDIA5_HUMAN Protein disulfide-isomerase A5
Q14558-2	PRPSAP1	very slow	0.0091	>200	1	KPRA_HUMAN Isoform 2 of Phosphoribosyl pyrophosphate synthase-associated protein 1
Q14566	MCM6	0.04337	0.0095	15.9822	2	MCM6_HUMAN DNA replication licensing factor MCM6
Q14571	ITPR2	0.000903687	0.00732	>200	1	ITPR2_HUMAN Inositol 1,4,5-trisphosphate receptor type 2
Q14592	ZNF460	0.03336	0.00608	20.7778	1	ZN460_HUMAN Zinc finger protein 460
Q14643	ITPR1	0.09638	0.01417	7.19182	2	ITPR1_HUMAN Inositol 1,4,5-trisphosphate receptor type 1
Q14651	PLS1	0.01864	0.00823	37.186	5	PLSI_HUMAN Plastin-1
Q14653-4	IRF3	0.02072	0.00888	33.453	1	IRF3_HUMAN Isoform 4 of Interferon regulatory factor 3
Q14669-3	TRIP12	0.03056	0.00476	22.6815	5	TRIPC_HUMAN Isoform 3 of E3 ubiquitin-protein ligase TRIP12
Q14671-3	PUM1	0.03308	0.00617	20.9537	2	PUM1_HUMAN Isoform 3 of Pumilio homolog 1
Q14677-3	CLINT1	0.02485	0.00269	27.8932	8	EPN4_HUMAN Isoform 3 of Clathrin interactor 1
Q14684	RRP1B	0.01529	0.00608	45.3334	3	RRP1B_HUMAN Ribosomal RNA processing protein 1 homolog B
Q14687	GSE1	0.10474	0.01921	6.61779	7	GSE1_HUMAN Genetic suppressor element 1
Q14690	PDCD11	0.00877	0.01276	79.0362	1	RRP5_HUMAN Protein RRP5 homolog
Q14692	BMS1	0.01763	0.00468	39.3163	4	BMS1_HUMAN Ribosome biogenesis protein BMS1 homolog
Q14694-2	USP10	0.01388	0.0052	49.9386	4	UBP10_HUMAN Isoform 2 of Ubiquitin carboxyl-terminal hydrolase 10
Q14696	MESDC2	0.0193	0.00783	35.9144	2	MESD_HUMAN LDLR chaperone MESD
Q14697-2	GANAB	0.02716	0.0101	25.5209	4	GANAB_HUMAN Isoform 2 of Neutral alpha-glucosidase AB
Q14728	MFSD10	0.02082	0.00708	33.2924	1	MFS10_HUMAN Major facilitator superfamily domain-containing protein 10
Q14738	PPP2R5D	0.00825	0.00256	84.0178	4	2A5D_HUMAN Serine/threonine-protein phosphatase 2A 56 kDa regulatory subunit delta isoform
Q14739	LBR	0.01479	0.00567	46.8659	2	LBR_HUMAN Lamin-B receptor
Q14790-9	CASP8	0.01423	0.0039	48.7103	2	CASP8_HUMAN Isoform 9 of Caspase-8
Q14807	KIF22	0.07804	0.00449	8.88195	4	KIF22_HUMAN Kinesin-like protein KIF22
Q14839-2	CHD4	0.02731	0.00247	25.3807	11	CHD4_HUMAN Isoform 2 of Chromodomain-helicase-DNA-binding protein 4
Q14847	LASP1	very slow	0.00338	>200	1	LASP1_HUMAN LIM and SH3 domain protein 1
Q14847-2	LASP1	0.03092	0.01967	22.4174	8	LASP1_HUMAN Isoform 2 of LIM and SH3 domain protein 1
Q14865	ARID5B	0.1064	0.00977	6.51454	2	ARI5B_HUMAN AT-rich interactive domain-containing protein 5B
Q14919-2	DRAP1	0.12513	0.00748	5.53942	1	NC2A_HUMAN Isoform 2 of Dr1-associated corepressor
Q14966	ZNF638	0.01939	0.00472	35.7477	4	ZN638_HUMAN Zinc finger protein 638
Q14974	KPNB1	0.02702	0.00469	25.6531	5	IMB1_HUMAN Importin subunit beta-1
Q14980	NUMA1	0.02344	0.00657	29.5711	19	NUMA1_HUMAN Nuclear mitotic apparatus protein 1
Q14C86-6	GAPVD1	0.01301	0.00529	53.278	4	GAPD1_HUMAN Isoform 6 of GTPase-activating protein and VPS9 domain-containing protein 1
Q15005	SPCS2	0.01571	0.00285	44.1214	5	SPCS2_HUMAN Signal peptidase complex subunit 2
Q15006	EMC2	0.02726	0.00939	25.4273	3	EMC2_HUMAN ER membrane protein complex subunit 2
Q15007	WTAP	0.10947	0.01845	6.33185	1	FL2D_HUMAN Pre-mRNA-splicing regulator WTAP
Q15008	PSMD6	0.09229	0.01421	7.51053	9	PSMD6_HUMAN 26S proteasome non-ATPase regulatory subunit 6
Q15014	MORF4L2	0.1656	0.02402	4.18567	7	MO4L2_HUMAN Mortality factor 4-like protein 2
Q15019-2	SEPT2	0.05226	0.01504	13.2634	7	SEPT2_HUMAN Isoform 2 of Septin-2
Q15020	SART3	0.01246	0.01471	55.6298	2	SART3_HUMAN Squamous cell carcinoma antigen recognized by T-cells 3
Q15025	TNIP1	0.11222	0.02477	6.17668	1	TNIP1_HUMAN TNFAIP3-interacting protein 1
Q15029	EFTUD2	0.02347	0.01513	29.5333	1	U5S1_HUMAN 116 kDa U5 small nuclear ribonucleoprotein component
Q15031	LARS2	0.14318	0.01489	4.84109	2	SYLM_HUMAN Probable leucine--tRNA ligase, mitochondrial
Q15032	R3HDM1	0.00687	0.00476	100.895	2	R3HD1_HUMAN R3H domain-containing protein 1
Q15035	TRAM2	0.05036	0.00858	13.7638	1	TRAM2_HUMAN Translocating chain-associated membrane protein 2
Q15041	ARL6IP1	0.01903	0.00507	36.4239	3	AR6P1_HUMAN ADP-ribosylation factor-like protein 6-interacting protein 1
Q15046	KARS	0.05995	0.02231	11.5621	1	SYK_HUMAN Lysine--tRNA ligase
Q15046-2	KARS	0.03778	0.00894	18.3469	5	SYK_HUMAN Isoform Mitochondrial of Lysine--tRNA ligase
Q15054	POLD3	0.03662	0.0085	18.9281	2	DPOD3_HUMAN DNA polymerase delta subunit 3
Q15056	EIF4H	0.02274	0.01026	30.4814	3	IF4H_HUMAN Eukaryotic translation initiation factor 4H
Q15059	BRD3	0.0219	0.00757	31.6506	2	BRD3_HUMAN Bromodomain-containing protein 3
Q15061	WDR43	0.08653	0.01061	8.01048	5	WDR43_HUMAN WD repeat-containing protein 43
Q15070	OXA1L	0.02755	0.00527	25.1596	3	OXA1L_HUMAN Mitochondrial inner membrane protein OXA1L
Q15084-2	PDIA6	0.00932	0.00737	74.372	6	PDIA6_HUMAN Isoform 2 of Protein disulfide-isomerase A6
Q15119	PDK2	0.05412	0.0086	12.8076	1	PDK2_HUMAN [Pyruvate dehydrogenase (acetyl-transferring)] kinase isozyme 2, mitochondrial
Q15120-2	PDK3	0.0788	0.00382	8.79628	4	PDK3_HUMAN Isoform 2 of [Pyruvate dehydrogenase (acetyl-transferring)] kinase isozyme 3, mitochondrial
Q15131	CDK10	0.0992	0.02147	6.98737	1	CDK10_HUMAN Cyclin-dependent kinase 10
Q15149	PLEC	0.04148	0.00605	16.7104	17	PLEC_HUMAN Plectin
Q15170-2	TCEAL1	0.05162	0.00582	13.4279	2	TCAL1_HUMAN Isoform 2 of Transcription elongation factor A protein-like 1
Q15172	PPP2R5A	very slow	0.00329	>200	2	2A5A_HUMAN Serine/threonine-protein phosphatase 2A 56 kDa regulatory subunit alpha isoform
Q15173	PPP2R5B	0.00475	0.00334	145.926	1	2A5B_HUMAN Serine/threonine-protein phosphatase 2A 56 kDa regulatory subunit beta isoform
Q15181	PPA1	0.03228	0.00542	21.473	6	IPYR_HUMAN Inorganic pyrophosphatase
Q15185	PTGES3	0.01826	0.02209	37.9599	3	TEBP_HUMAN Prostaglandin E synthase 3
Q15233	NONO	0.05585	0.00788	12.4109	7	NONO_HUMAN Non-POU domain-containing octamer-binding protein
Q15257	PPP2R4	0.01893	0.00603	36.6163	4	PTPA_HUMAN Serine/threonine-protein phosphatase 2A activator
Q15257-2	PPP2R4	0.00609	0.00353	113.817	1	PTPA_HUMAN Isoform 1 of Serine/threonine-protein phosphatase 2A activator
Q15269	PWP2	0.09522	0.01327	7.27943	1	PWP2_HUMAN Periodic tryptophan protein 2 homolog
Q15286	RAB35	0.06475	0.01763	10.705	3	RAB35_HUMAN Ras-related protein Rab-35
Q15287	RNPS1	0.03859	0.00858	17.9618	2	RNPS1_HUMAN RNA-binding protein with serine-rich domain 1
Q15345	LRRC41	0.07253	0.0095	9.5567	2	LRC41_HUMAN Leucine-rich repeat-containing protein 41
Q15349-2	RPS6KA2	very slow	0.00567	>200	1	KS6A2_HUMAN Isoform 2 of Ribosomal protein S6 kinase alpha-2
Q15363	TMED2	0.05394	0.01678	12.8503	2	TMED2_HUMAN Transmembrane emp24 domain-containing protein 2
Q15366-2	PCBP2	0.00292	0.00438	>200	1	PCBP2_HUMAN Isoform 2 of Poly(rC)-binding protein 2
Q15369	TCEB1	0.0469	0.01219	14.7793	1	ELOC_HUMAN Transcription elongation factor B polypeptide 1
Q15370-2	TCEB2	0.03932	0.00278	17.6284	4	ELOB_HUMAN Isoform 2 of Transcription elongation factor B polypeptide 2
Q15382	RHEB	0.00769	0.00729	90.1362	1	RHEB_HUMAN GTP-binding protein Rheb
Q15386	UBE3C	0.02623	0.00206	26.4257	2	UBE3C_HUMAN Ubiquitin-protein ligase E3C
Q15388	TOMM20	0.02987	0.00634	23.2055	3	TOM20_HUMAN Mitochondrial import receptor subunit TOM20 homolog
Q15392	DHCR24	0.07061	0.01164	9.81656	5	DHC24_HUMAN Delta(24)-sterol reductase
Q15393	SF3B3	0.0092	0.00837	75.3421	1	SF3B3_HUMAN Splicing factor 3B subunit 3
Q15398	DLGAP5	0.0263	0.008	26.3554	6	DLGP5_HUMAN Disks large-associated protein 5
Q15404	RSU1	0.01206	0.00575	57.4749	1	RSU1_HUMAN Ras suppressor protein 1
Q15417	CNN3	0.00994	0.00222	69.7331	1	CNN3_HUMAN Calponin-3
Q15427	SF3B4	0.02647	0.00474	26.1861	1	SF3B4_HUMAN Splicing factor 3B subunit 4
Q15428	SF3A2	0.05438	0.00678	12.7464	2	SF3A2_HUMAN Splicing factor 3A subunit 2
Q15437	SEC23B	0.0179	0.00575	38.7233	2	SC23B_HUMAN Protein transport protein Sec23B
Q15459	SF3A1	0.03062	0.01201	22.6371	3	SF3A1_HUMAN Splicing factor 3A subunit 1
Q15465	SHH	0.06339	0.00436	10.9346	5	SHH_HUMAN Sonic hedgehog protein
Q15526	SURF1	0.05217	0.00474	13.2863	2	SURF1_HUMAN Surfeit locus protein 1
Q15554-3	TERF2	0.04252	0.00789	16.3017	2	TERF2_HUMAN Isoform 3 of Telomeric repeat-binding factor 2
Q15555	MAPRE2	0.05982	0.03252	11.5872	1	MARE2_HUMAN Microtubule-associated protein RP/EB family member 2
Q15560	TCEA2	0.05967	0.00733	11.6163	2	TCEA2_HUMAN Transcription elongation factor A protein 2
Q15562-2	TEAD2	0.0252	0.00406	27.5058	2	TEAD2_HUMAN Isoform 2 of Transcriptional enhancer factor TEF-4
Q15596	NCOA2	0.14309	0.02461	4.84413	1	NCOA2_HUMAN Nuclear receptor coactivator 2
Q15629	TRAM1	0.04159	0.02004	16.6662	1	TRAM1_HUMAN Translocating chain-associated membrane protein 1
Q15631	TSN	0.05703	0.02495	12.1541	2	TSN_HUMAN Translin
Q15637-5	SF1	0.02642	0.01013	26.2357	3	SF01_HUMAN Isoform 5 of Splicing factor 1
Q15643	TRIP11	0.00252	0.00638	>200	13	TRIPB_HUMAN Thyroid receptor-interacting protein 11
Q15649	ZNHIT3	0.0879	0.01049	7.88563	1	ZNHI3_HUMAN Zinc finger HIT domain-containing protein 3
Q15691	MAPRE1	0.00757	0.00649	91.565	7	MARE1_HUMAN Microtubule-associated protein RP/EB family member 1
Q15700-2	DLG2	very slow	0.01646	>200	1	DLG2_HUMAN Isoform 2 of Disks large homolog 2
Q15717	ELAVL1	0.01554	0.00512	44.6041	3	ELAV1_HUMAN ELAV-like protein 1
Q15738	NSDHL	0.03874	0.00877	17.8923	6	NSDHL_HUMAN Sterol-4-alpha-carboxylate 3-dehydrogenase, decarboxylating
Q15742	NAB2	0.03149	0.00761	22.0117	4	NAB2_HUMAN NGFI-A-binding protein 2
Q15758	SLC1A5	0.02683	0.01327	25.8348	1	AAAT_HUMAN Neutral amino acid transporter B(0)
Q15771	RAB30	0.04285	0.00783	16.1761	4	RAB30_HUMAN Ras-related protein Rab-30
Q15785	TOMM34	0.01612	0.01148	42.9992	2	TOM34_HUMAN Mitochondrial import receptor subunit TOM34
Q15800	MSMO1	0.05504	0.00718	12.5935	1	MSMO1_HUMAN Methylsterol monooxygenase 1
Q15833	STXBP2	0.0772	0.00584	8.97859	1	STXB2_HUMAN Syntaxin-binding protein 2
Q15843	NEDD8	very slow	0.00696	>200	3	NEDD8_HUMAN NEDD8
Q15906-2	VPS72	0.12903	0.02062	5.37198	1	VPS72_HUMAN Isoform 2 of Vacuolar protein sorting-associated protein 72 homolog
Q15907	RAB11B	0.00577	0.00737	120.129	3	RB11B_HUMAN Ras-related protein Rab-11B
Q15910-2	EZH2	0.07254	0.00506	9.55538	1	EZH2_HUMAN Isoform 2 of Histone-lysine N-methyltransferase EZH2
Q15942	ZYX	0.00795	0.01165	87.1883	1	ZYX_HUMAN Zyxin
Q16181	SEPT7	0.06353	0.00723	10.9105	8	SEPT7_HUMAN Septin-7
Q16186	ADRM1	0.04287	0.00512	16.1686	5	ADRM1_HUMAN Proteasomal ubiquitin receptor ADRM1
Q16394	EXT1	0.01039	0.01054	66.7129	1	EXT1_HUMAN Exostosin-1
Q16401	PSMD5	0.01713	0.0069	40.4639	1	PSMD5_HUMAN 26S proteasome non-ATPase regulatory subunit 5
Q16512-2	PKN1	0.00886	0.00967	78.2333	3	PKN1_HUMAN Isoform 2 of Serine/threonine-protein kinase N1
Q16513	PKN2	0.00407	0.00339	170.306	1	PKN2_HUMAN Serine/threonine-protein kinase N2
Q16527	CSRP2	0.03184	0.01129	21.7697	2	CSRP2_HUMAN Cysteine and glycine-rich protein 2
Q16531	DDB1	0.05582	0.01092	12.4175	1	DDB1_HUMAN DNA damage-binding protein 1
Q16537	PPP2R5E	0.01491	0.00453	46.4887	1	2A5E_HUMAN Serine/threonine-protein phosphatase 2A 56 kDa regulatory subunit epsilon isoform
Q16539	MAPK14	0.00512	0.0023	135.38	1	MK14_HUMAN Mitogen-activated protein kinase 14
Q16543	CDC37	0.00987	0.00208	70.2277	7	CDC37_HUMAN Hsp90 co-chaperone Cdc37
Q16555	DPYSL2	0.03306	0.0087	20.9663	2	DPYL2_HUMAN Dihydropyrimidinase-related protein 2
Q16563	SYPL1	0.03143	0.01022	22.0537	1	SYPL1_HUMAN Synaptophysin-like protein 1
Q16576-2	RBBP7	0.03226	0.01395	21.4863	3	RBBP7_HUMAN Isoform 2 of Histone-binding protein RBBP7
Q16625	OCLN	0.03121	0.00412	22.2091	4	OCLN_HUMAN Occludin
Q16629	SRSF7	0.03307	0.00836	20.96	1	SRSF7_HUMAN Serine/arginine-rich splicing factor 7
Q16630-2	CPSF6	0.0474	0.01159	14.6234	3	CPSF6_HUMAN Isoform 2 of Cleavage and polyadenylation specificity factor subunit 6
Q16644	MAPKAPK3	0.08431	0.00639	8.22141	1	MAPK3_HUMAN MAP kinase-activated protein kinase 3
Q16698	DECR1	0.09764	0.01252	7.09901	2	DECR_HUMAN 2,4-dienoyl-CoA reductase, mitochondrial
Q16706	MAN2A1	0.03039	0.01347	22.8084	1	MA2A1_HUMAN Alpha-mannosidase 2
Q16718	NDUFA5	0.08454	0.01821	8.19904	3	NDUA5_HUMAN NADH dehydrogenase [ubiquinone] 1 alpha subcomplex subunit 5
Q16719	KYNU	0.05865	0.01343	11.8184	2	KYNU_HUMAN Kynureninase
Q16762	TST	0.04954	0.00998	13.9917	5	THTR_HUMAN Thiosulfate sulfurtransferase
Q16763	UBE2S	0.01243	0.00827	55.7641	1	UBE2S_HUMAN Ubiquitin-conjugating enzyme E2 S
Q16775	HAGH	0.02993	0.01474	23.1589	1	GLO2_HUMAN Hydroxyacylglutathione hydrolase, mitochondrial
Q16795	NDUFA9	0.03553	0.00937	19.5088	3	NDUA9_HUMAN NADH dehydrogenase [ubiquinone] 1 alpha subcomplex subunit 9, mitochondrial
Q16822	PCK2	0.05755	0.01011	12.0443	2	PCKGM_HUMAN Phosphoenolpyruvate carboxykinase [GTP], mitochondrial
Q16836-2	HADH	0.01778	0.01082	38.9847	5	HCDH_HUMAN Isoform 2 of Hydroxyacyl-coenzyme A dehydrogenase, mitochondrial
Q16850	CYP51A1	0.14078	0.00781	4.92362	6	CP51A_HUMAN Lanosterol 14-alpha demethylase
Q16864-2	ATP6V1F	0.03643	0.00668	19.0268	1	VATF_HUMAN Isoform 2 of V-type proton ATPase subunit F
Q16881	TXNRD1	0.0237	0.00592	29.2467	2	TRXR1_HUMAN Thioredoxin reductase 1, cytoplasmic
Q16890	TPD52L1	0.05909	0.01365	11.7304	4	TPD53_HUMAN Tumor protein D53
Q16891	IMMT	0.03889	0.0063	17.8233	13	IMMT_HUMAN Mitochondrial inner membrane protein
Q1ED39	KNOP1	0.01221	0.00383	56.7688	3	KNOP1_HUMAN Lysine-rich nucleolar protein 1
Q1KMD3	HNRNPUL2	0.01825	0.00382	37.9807	6	HNRL2_HUMAN Heterogeneous nuclear ribonucleoprotein U-like protein 2
Q1MSJ5	CSPP1	0.03271	0.00224	21.1907	1	CSPP1_HUMAN Centrosome and spindle pole-associated protein 1
Q27J81	INF2	0.0468	0.00755	14.8108	5	INF2_HUMAN Inverted formin-2
Q29RF7	PDS5A	0.04913	0.00632	14.1084	9	PDS5A_HUMAN Sister chromatid cohesion protein PDS5 homolog A
Q2M1P5	KIF7	0.00133	0.00846	>200	1	KIF7_HUMAN Kinesin-like protein KIF7
Q2PZI1	DPY19L1	0.0288	0.0096	24.0676	1	D19L1_HUMAN Probable C-mannosyltransferase DPY19L1
Q2TAL8	QRICH1	0.02949	0.00277	23.5045	2	QRIC1_HUMAN Glutamine-rich protein 1
Q2TAY7	SMU1	0.06542	0.01553	10.5953	3	SMU1_HUMAN WD40 repeat-containing protein SMU1
Q2VIQ3	KIF4B	0.04144	0.0103	16.7265	2	KIF4B_HUMAN Chromosome-associated kinesin KIF4B
Q32P41	TRMT5	0.04325	0.0065	16.0265	1	TRM5_HUMAN tRNA (guanine(37)-N1)-methyltransferase
Q3KQU3	MAP7D1	0.00114	0.02009	>200	2	MA7D1_HUMAN MAP7 domain-containing protein 1
Q3LXA3	DAK	0.07308	0.01221	9.48477	1	DHAK_HUMAN Bifunctional ATP-dependent dihydroxyacetone kinase/FAD-AMP lyase (cyclizing)
Q3SXY8	ARL13B	0.04213	0.00962	16.4526	1	AR13B_HUMAN ADP-ribosylation factor-like protein 13B
Q3SYG4-3	BBS9	0.07836	0.02428	8.84568	1	PTHB1_HUMAN Isoform 3 of Protein PTHB1
Q3YEC7-2	RABL6	0.04951	0.00787	14.0001	3	RABL6_HUMAN Isoform 2 of Rab-like protein 6
Q3ZCQ8-2	TIMM50	0.033	0.008	21.0045	2	TIM50_HUMAN Isoform 2 of Mitochondrial import inner membrane translocase subunit TIM50
Q3ZCX4	ZNF568	0.05847	0.01233	11.8547	1	ZN568_HUMAN Zinc finger protein 568
Q49A26	GLYR1	0.02342	0.00648	29.5964	1	GLYR1_HUMAN Putative oxidoreductase GLYR1
Q49B96	COX19	0.00671	0.01218	103.301	1	COX19_HUMAN Cytochrome c oxidase assembly protein COX19
Q4G0J3-3	LARP7	0.01176	0.00662	58.9411	1	LARP7_HUMAN Isoform 3 of La-related protein 7
Q4G176	ACSF3	0.04001	0.00669	17.3243	1	ACSF3_HUMAN Acyl-CoA synthetase family member 3, mitochondrial
Q4J6C6	PREPL	0.02452	0.01044	28.2686	1	PPCEL_HUMAN Prolyl endopeptidase-like
Q4KMP7	TBC1D10B	0.01047	0.0038	66.2032	2	TB10B_HUMAN TBC1 domain family member 10B
Q4KMQ1	TPRN	0.02173	0.00513	31.8982	1	TPRN_HUMAN Taperin
Q4LE39	ARID4B	0.01406	0.01175	49.2992	1	ARI4B_HUMAN AT-rich interactive domain-containing protein 4B
Q4U2R6	MRPL51	0.12029	0.00786	5.7623	2	RM51_HUMAN 39S ribosomal protein L51, mitochondrial
Q4VC05-2	BCL7A	0.05585	0.0083	12.4109	1	BCL7A_HUMAN Isoform 2 of B-cell CLL/lymphoma 7 protein family member A
Q4VC31	CCDC58	0.03071	0.0051	22.5707	3	CCD58_HUMAN Coiled-coil domain-containing protein 58
Q4VCS5	AMOT	0.04329	0.0068	16.0117	1	AMOT_HUMAN Angiomotin
Q4ZG55	GREB1	0.12977	0.01164	5.34135	1	GREB1_HUMAN Protein GREB1
Q53FV1	ORMDL2	0.04497	0.00468	15.4135	2	ORML2_HUMAN ORM1-like protein 2
Q53GA4	PHLDA2	0.10279	0.00687	6.74333	1	PHLA2_HUMAN Pleckstrin homology-like domain family A member 2
Q53GQ0	HSD17B12	0.03919	0.00798	17.6868	3	DHB12_HUMAN Estradiol 17-beta-dehydrogenase 12
Q53GS9	USP39	0.03238	0.00621	21.4066	2	SNUT2_HUMAN U4/U6.U5 tri-snRNP-associated protein 2
Q53H12	AGK	0.03323	0.01159	20.8591	6	AGK_HUMAN Acylglycerol kinase, mitochondrial
Q53H82	LACTB2	0.02916	0.00513	23.7705	1	LACB2_HUMAN Beta-lactamase-like protein 2
Q53HC0	CCDC92	0.01402	0.00335	49.4399	1	CCD92_HUMAN Coiled-coil domain-containing protein 92
Q53SF7	COBLL1	0.02425	0.00533	28.5834	6	COBL1_HUMAN Cordon-bleu protein-like 1
Q562F6	SGOL2	0.04867	0.01072	14.2418	1	SGOL2_HUMAN Shugoshin-like 2
Q562R1	ACTBL2	0.08092	0.02123	8.56583	1	ACTBL_HUMAN Beta-actin-like protein 2
Q567U6	CCDC93	0.01626	0.02229	42.629	1	CCD93_HUMAN Coiled-coil domain-containing protein 93
Q56NI9	ESCO2	0.02518	0.00405	27.5277	4	ESCO2_HUMAN N-acetyltransferase ESCO2
Q56P03	EAPP	0.08608	0.0095	8.05236	1	EAPP_HUMAN E2F-associated phosphoprotein
Q56VL3	OCIAD2	0.00711	0.0044	97.4891	2	OCAD2_HUMAN OCIA domain-containing protein 2
Q5BJF6	ODF2	0.0345	0.00405	20.0912	2	ODFP2_HUMAN Outer dense fiber protein 2
Q5BKT4	ALG10	0.02189	0.00532	31.665	2	AG10A_HUMAN Dol-P-Glc:Glc(2)Man(9)GlcNAc(2)-PP-Dol alpha-1,2-glucosyltransferase
Q5C9Z4	NOM1	0.07184	0.00825	9.64849	3	NOM1_HUMAN Nucleolar MIF4G domain-containing protein 1
Q5D1E8	ZC3H12A	0.0703	0.01035	9.85985	1	ZC12A_HUMAN Ribonuclease ZC3H12A
Q5F1R6-2	DNAJC21	0.01584	0.00666	43.7593	2	DJC21_HUMAN Isoform 2 of DnaJ homolog subfamily C member 21
Q5H9L2	TCEAL5	0.09169	0.01974	7.55968	1	TCAL5_HUMAN Transcription elongation factor A protein-like 5
Q5H9R7-5	PPP6R3	0.05073	0.00782	13.6635	2	PP6R3_HUMAN Isoform 5 of Serine/threonine-protein phosphatase 6 regulatory subunit 3
Q5HYI7	MTX3	0.05194	0.01512	13.3452	2	MTX3_HUMAN Metaxin-3
Q5HYI8	RABL3	0.019	0.0076	36.4814	2	RABL3_HUMAN Rab-like protein 3
Q5HYK3	COQ5	0.06021	0.00521	11.5122	1	COQ5_HUMAN 2-methoxy-6-polyprenyl-1,4-benzoquinol methylase, mitochondrial
Q5J8M3	EMC4	0.03506	0.00659	19.7703	2	EMC4_HUMAN ER membrane protein complex subunit 4
Q5JPH6	EARS2	0.03751	0.00754	18.479	2	SYEM_HUMAN Probable glutamate--tRNA ligase, mitochondrial
Q5JRX3-2	PITRM1	0.02225	0.00782	31.1527	5	PREP_HUMAN Isoform 2 of Presequence protease, mitochondrial
Q5JSZ5	PRRC2B	0.02958	0.00993	23.433	11	PRC2B_HUMAN Protein PRRC2B
Q5JTH9	RRP12	0.02897	0.0051	23.9264	5	RRP12_HUMAN RRP12-like protein
Q5JTV8	TOR1AIP1	0.04331	0.02154	16.0043	4	TOIP1_HUMAN Torsin-1A-interacting protein 1
Q5JUV4	NT5C2	0.07928	0.01629	8.74303	1	Q5JUV4_HUMAN Cytosolic purine 5'-nucleotidase (Fragment)
Q5JVF3-4	PCID2	0.01087	0.00346	63.767	3	PCID2_HUMAN Isoform 4 of PCI domain-containing protein 2
Q5JWF2	GNAS	0.08851	0.01014	7.83129	1	GNAS1_HUMAN Guanine nucleotide-binding protein G(s) subunit alpha isoforms XLas
Q5JXB2	UBE2NL	0.01225	0.01048	56.5834	2	UE2NL_HUMAN Putative ubiquitin-conjugating enzyme E2 N-like
Q5K651	SAMD9	0.02144	0.00371	32.3296	1	SAMD9_HUMAN Sterile alpha motif domain-containing protein 9
Q5M775	SPECC1	very slow	0.00822	>200	2	CYTSB_HUMAN Cytospin-B
Q5MNZ9	WIPI1	0.00697	0.00315	99.4472	1	WIPI1_HUMAN WD repeat domain phosphoinositide-interacting protein 1
Q5PRF9	SAMD4B	0.00333	0.00656	>200	1	SMAG2_HUMAN Protein Smaug homolog 2
Q5QNW6-2	HIST2H2BF	0.02836	0.01959	24.441	5	H2B2F_HUMAN Isoform 2 of Histone H2B type 2-F
Q5SGD2	PPM1L	0.01661	0.00497	41.7307	1	PPM1L_HUMAN Protein phosphatase 1L
Q5SRE5	NUP188	0.09078	0.01153	7.63546	3	NU188_HUMAN Nucleoporin NUP188 homolog
Q5SSJ5	HP1BP3	0.01577	0.00479	43.9535	13	HP1B3_HUMAN Heterochromatin protein 1-binding protein 3
Q5ST30-4	VARS2	0.05297	0.0103	13.0857	1	SYVM_HUMAN Isoform 4 of Valine--tRNA ligase, mitochondrial
Q5SW96	LDLRAP1	0.01885	0.00385	36.7717	1	ARH_HUMAN Low density lipoprotein receptor adapter protein 1
Q5SWX8	ODR4	0.03686	0.01062	18.8049	1	ODR4_HUMAN Protein odr-4 homolog
Q5T0D9	TPRG1L	0.04375	0.00508	15.8434	1	TPRGL_HUMAN Tumor protein p63-regulated gene 1-like protein
Q5T0W9	FAM83B	0.02124	0.01004	32.634	4	FA83B_HUMAN Protein FAM83B
Q5T1J5	CHCHD2P9	0.26088	0.04033	2.65696	1	CHCH9_HUMAN Putative coiled-coil-helix-coiled-coil-helix domain-containing protein CHCHD2P9, mitochondrial
Q5T280	C9orf114	0.02436	0.01002	28.4543	2	CI114_HUMAN Uncharacterized protein C9orf114
Q5T3I0-3	GPATCH4	0.0482	0.02259	14.3806	2	GPTC4_HUMAN Isoform 3 of G patch domain-containing protein 4
Q5T4F4-3	ZFYVE27	very slow	0.00589	>200	1	ZFY27_HUMAN Isoform 3 of Protrudin
Q5T4S7-2	UBR4	0.02064	0.00695	33.5827	2	UBR4_HUMAN Isoform 2 of E3 ubiquitin-protein ligase UBR4
Q5T5Y3-3	CAMSAP1	0.03089	0.00611	22.4392	2	CAMP1_HUMAN Isoform 3 of Calmodulin-regulated spectrin-associated protein 1
Q5T6F2	UBAP2	0.02222	0.01239	31.1947	3	UBAP2_HUMAN Ubiquitin-associated protein 2
Q5T6S3	PHF19	0.0424	0.01024	16.3478	1	PHF19_HUMAN PHD finger protein 19
Q5T8D3	ACBD5	0.02449	0.00796	28.3033	3	ACBD5_HUMAN Acyl-CoA-binding domain-containing protein 5
Q5T8D3-3	ACBD5	0.02511	0.0057	27.6044	1	ACBD5_HUMAN Isoform 3 of Acyl-CoA-binding domain-containing protein 5
Q5T8P6	RBM26	0.03527	0.00403	19.6526	3	RBM26_HUMAN RNA-binding protein 26
Q5T9A4	ATAD3B	0.04138	0.00302	16.7508	6	ATD3B_HUMAN ATPase family AAA domain-containing protein 3B
Q5TFE4	NT5DC1	0.03735	0.0138	18.5582	3	NT5D1_HUMAN 5'-nucleotidase domain-containing protein 1
Q5TGZ0	MINOS1	0.05456	0.01778	12.7043	1	MOS1_HUMAN Mitochondrial inner membrane organizing system protein 1
Q5TH69	ARFGEF3	very slow	0.01719	>200	1	BIG3_HUMAN Brefeldin A-inhibited guanine nucleotide-exchange protein 3
Q5TKA1-2	LIN9	0.01526	0.00639	45.4225	1	LIN9_HUMAN Isoform 2 of Protein lin-9 homolog
Q5U3C3	TMEM164	0.07095	0.00605	9.76952	2	TM164_HUMAN Transmembrane protein 164
Q5U5X0	LYRM7	0.03807	0.01149	18.2072	1	LYRM7_HUMAN Complex III assembly factor LYRM7
Q5UIP0	RIF1	0.07676	0.00748	9.03006	2	RIF1_HUMAN Telomere-associated protein RIF1
Q5VIR6-4	VPS53	0.07574	0.00816	9.15167	2	VPS53_HUMAN Isoform 4 of Vacuolar protein sorting-associated protein 53 homolog
Q5VSL9	STRIP1	0.02124	0.00252	32.634	1	STRP1_HUMAN Striatin-interacting protein 1
Q5VT06	CEP350	0.01197	0.0076	57.907	1	CE350_HUMAN Centrosome-associated protein 350
Q5VT52	RPRD2	0.00842	0.00441	82.3215	9	RPRD2_HUMAN Regulation of nuclear pre-mRNA domain-containing protein 2
Q5VTE0	EEF1A1P5	0.11984	0.01392	5.78394	5	EF1A3_HUMAN Putative elongation factor 1-alpha-like 3
Q5VTQ0	TTC39B	0.0609	0.00712	11.3817	1	TT39B_HUMAN Tetratricopeptide repeat protein 39B
Q5VTR2	RNF20	0.01291	0.01132	53.6907	2	BRE1A_HUMAN E3 ubiquitin-protein ligase BRE1A
Q5VV41	ARHGEF16	0.02427	0.00409	28.5598	3	ARHGG_HUMAN Rho guanine nucleotide exchange factor 16
Q5VW32	BROX	0.01942	0.00205	35.6924	3	BROX_HUMAN BRO1 domain-containing protein BROX
Q5VW38	GPR107	0.05705	0.00621	12.1498	4	GP107_HUMAN Protein GPR107
Q5VWN6	FAM208B	0.09489	0.015	7.30474	1	F208B_HUMAN Protein FAM208B
Q5VWZ2	LYPLAL1	0.01661	0.00367	41.7307	2	LYPL1_HUMAN Lysophospholipase-like protein 1
Q5VYK3	ECM29	0.02652	0.00613	26.1368	7	ECM29_HUMAN Proteasome-associated protein ECM29 homolog
Q5VZE5	NAA35	0.05175	0.00563	13.3941	1	NAA35_HUMAN N-alpha-acetyltransferase 35, NatC auxiliary subunit
Q5W0Z9	ZDHHC20	0.04796	0.00611	14.4526	2	ZDH20_HUMAN Probable palmitoyltransferase ZDHHC20
Q5XKP0	QIL1	0.0278	0.00415	24.9334	3	QIL1_HUMAN Protein QIL1
Q63ZY3-2	KANK2	0.05557	0.00759	12.4734	1	KANK2_HUMAN Isoform 2 of KN motif and ankyrin repeat domain-containing protein 2
Q658Y4	FAM91A1	0.02159	0.00658	32.105	1	F91A1_HUMAN Protein FAM91A1
Q66K64	DCAF15	0.04176	0.0056	16.5984	1	DCA15_HUMAN DDB1- and CUL4-associated factor 15
Q66K74	MAP1S	0.02722	0.00725	25.4646	1	MAP1S_HUMAN Microtubule-associated protein 1S
Q66PJ3	ARL6IP4	very slow	0.00495	>200	1	AR6P4_HUMAN ADP-ribosylation factor-like protein 6-interacting protein 4
Q685J3	MUC17	0.03183	0.00374	21.7765	1	MUC17_HUMAN Mucin-17
Q68D10	SPTY2D1	0.03883	0.00768	17.8508	3	SPT2_HUMAN Protein SPT2 homolog
Q69YH5	CDCA2	0.02871	0.00369	24.1431	4	CDCA2_HUMAN Cell division cycle-associated protein 2
Q69YQ0	SPECC1L	0.03281	0.00802	21.1261	1	CYTSA_HUMAN Cytospin-A
Q6AI08	HEATR6	0.04627	0.00795	14.9805	2	HEAT6_HUMAN HEAT repeat-containing protein 6
Q6DD87	ZNF787	0.013	0.00395	53.319	1	ZN787_HUMAN Zinc finger protein 787
Q6DD88	ATL3	0.04415	0.01439	15.6998	5	ATLA3_HUMAN Atlastin-3
Q6DKI1	RPL7L1	0.01795	0.00759	38.6154	3	RL7L_HUMAN 60S ribosomal protein L7-like 1
Q6DKK2	TTC19	0.03747	0.00808	18.4987	1	TTC19_HUMAN Tetratricopeptide repeat protein 19, mitochondrial
Q6DN03	HIST2H2BC	0.0082	0.00726	84.5301	1	H2B2C_HUMAN Putative histone H2B type 2-C
Q6FIF0	ZFAND6	very slow	0.01966	>200	2	ZFAN6_HUMAN AN1-type zinc finger protein 6
Q6GMV3	PTRHD1	very slow	0.0033	>200	2	PTRD1_HUMAN Putative peptidyl-tRNA hydrolase PTRHD1
Q6GQQ9	OTUD7B	0.03853	0.01114	17.9898	1	OTU7B_HUMAN OTU domain-containing protein 7B
Q6ICG6-2	KIAA0930	0.01581	0.00705	43.8423	2	K0930_HUMAN Isoform 2 of Uncharacterized protein KIAA0930
Q6IQ22	RAB12	0.02427	0.0059	28.5598	1	RAB12_HUMAN Ras-related protein Rab-12
Q6IQ49	SDE2	0.00216	0.00939	>200	1	SDE2_HUMAN Protein SDE2 homolog
Q6ISB3	GRHL2	0.06354	0.01391	10.9088	6	GRHL2_HUMAN Grainyhead-like protein 2 homolog
Q6KCM7-3	SLC25A25	0.06182	0.00846	11.2123	2	SCMC2_HUMAN Isoform 3 of Calcium-binding mitochondrial carrier protein SCaMC-2
Q6NUK1	SLC25A24	0.03623	0.00349	19.1319	8	SCMC1_HUMAN Calcium-binding mitochondrial carrier protein SCaMC-1
Q6NUK4	REEP3	0.02537	0.0048	27.3215	4	REEP3_HUMAN Receptor expression-enhancing protein 3
Q6NUQ4	TMEM214	0.01883	0.00432	36.8108	7	TM214_HUMAN Transmembrane protein 214
Q6NVY1	HIBCH	0.03048	0.01146	22.741	1	HIBCH_HUMAN 3-hydroxyisobutyryl-CoA hydrolase, mitochondrial
Q6NXE6	ARMC6	very slow	0.00841	>200	1	ARMC6_HUMAN Armadillo repeat-containing protein 6
Q6NXG1	ESRP1	0.04622	0.00619	14.9967	3	ESRP1_HUMAN Epithelial splicing regulatory protein 1
Q6NXR4	TTI2	0.05355	0.02327	12.9439	1	TTI2_HUMAN TELO2-interacting protein 2
Q6P087	RPUSD3	0.03877	0.00755	17.8784	1	RUSD3_HUMAN RNA pseudouridylate synthase domain-containing protein 3
Q6P1A2	LPCAT3	0.04489	0.00661	15.441	2	MBOA5_HUMAN Lysophospholipid acyltransferase 5
Q6P1J9	CDC73	0.02988	0.00671	23.1977	10	CDC73_HUMAN Parafibromin
Q6P1L8	MRPL14	0.0993	0.00963	6.98033	1	RM14_HUMAN 39S ribosomal protein L14, mitochondrial
Q6P1M3	LLGL2	0.0393	0.01407	17.6373	1	L2GL2_HUMAN Lethal(2) giant larvae protein homolog 2
Q6P1N0	CC2D1A	0.03432	0.00697	20.1966	3	C2D1A_HUMAN Coiled-coil and C2 domain-containing protein 1A
Q6P1N9	TATDN1	0.02888	0.00396	24.0009	4	TATD1_HUMAN Putative deoxyribonuclease TATDN1
Q6P2H3	CEP85	0.04377	0.00473	15.8361	3	CEP85_HUMAN Centrosomal protein of 85 kDa
Q6P2Q9	PRPF8	0.04341	0.00869	15.9675	7	PRP8_HUMAN Pre-mRNA-processing-splicing factor 8
Q6P3W7	SCYL2	0.03196	0.00613	21.688	7	SCYL2_HUMAN SCY1-like protein 2
Q6P4I2	WDR73	very slow	0.00502	>200	1	WDR73_HUMAN WD repeat-containing protein 73
Q6P6C2-1	ALKBH5	0.04444	0.00668	15.5974	1	ALKB5_HUMAN Isoform 1 of RNA demethylase ALKBH5
Q6P996	PDXDC1	0.02593	0.00599	26.7315	2	PDXD1_HUMAN Pyridoxal-dependent decarboxylase domain-containing protein 1
Q6PD62	CTR9	0.00968	0.00467	71.6061	3	CTR9_HUMAN RNA polymerase-associated protein CTR9 homolog
Q6PD74	AAGAB	very slow	0.0088	>200	1	AAGAB_HUMAN Alpha- and gamma-adaptin-binding protein p34
Q6PH85	DCUN1D2	very slow	0.00287	>200	1	DCNL2_HUMAN DCN1-like protein 2
Q6PI47	KCTD18	0.06576	0.01569	10.5406	1	KCD18_HUMAN BTB/POZ domain-containing protein KCTD18
Q6PI48	DARS2	0.06157	0.00814	11.2579	7	SYDM_HUMAN Aspartate--tRNA ligase, mitochondrial
Q6PJG2	ELMSAN1	0.0147	0.00985	47.1529	4	EMSA1_HUMAN ELM2 and SANT domain-containing protein 1
Q6PJT7	ZC3H14	0.03534	0.01069	19.6137	3	ZC3HE_HUMAN Zinc finger CCCH domain-containing protein 14
Q6PK04	CCDC137	0.0159	0.00615	43.5942	1	CC137_HUMAN Coiled-coil domain-containing protein 137
Q6PKG0	LARP1	0.03081	0.00795	22.4975	10	LARP1_HUMAN La-related protein 1
Q6PL18	ATAD2	0.06366	0.00978	10.8883	1	ATAD2_HUMAN ATPase family AAA domain-containing protein 2
Q6S8J3	POTEE	0.02026	0.00623	34.2126	2	POTEE_HUMAN POTE ankyrin domain family member E
Q6UB35	MTHFD1L	0.04327	0.00485	16.0191	2	C1TM_HUMAN Monofunctional C1-tetrahydrofolate synthase, mitochondrial
Q6UN15-3	FIP1L1	0.02556	0.00852	27.1184	1	FIP1_HUMAN Isoform 3 of Pre-mRNA 3'-end-processing factor FIP1
Q6UW02	CYP20A1	0.01567	0.00703	44.234	2	CP20A_HUMAN Cytochrome P450 20A1
Q6UW56-3	ATRAID	0.05035	0.00256	13.7666	1	ARAID_HUMAN Isoform 3 of All-trans retinoic acid-induced differentiation factor
Q6UX04	CWC27	very slow	0.01795	>200	1	CWC27_HUMAN Peptidyl-prolyl cis-trans isomerase CWC27 homolog
Q6UXG2	KIAA1324	0.07951	0.00348	8.71774	2	K1324_HUMAN UPF0577 protein KIAA1324
Q6UXN9	WDR82	0.02166	0.00674	32.0013	2	WDR82_HUMAN WD repeat-containing protein 82
Q6VY07-2	PACS1	0.03559	0.00747	19.4759	1	PACS1_HUMAN Isoform 2 of Phosphofurin acidic cluster sorting protein 1
Q6W2J9	BCOR	0.05003	0.004	13.8546	4	BCOR_HUMAN BCL-6 corepressor
Q6WKZ4	RAB11FIP1	0.02742	0.00879	25.2789	2	RFIP1_HUMAN Rab11 family-interacting protein 1
Q6XZF7	DNMBP	0.01094	0.00432	63.359	5	DNMBP_HUMAN Dynamin-binding protein
Q6Y7W6	GIGYF2	0.04802	0.00814	14.4346	1	PERQ2_HUMAN PERQ amino acid-rich with GYF domain-containing protein 2
Q6Y7W6-3	GIGYF2	0.00383	0.01246	180.978	7	PERQ2_HUMAN Isoform 2 of PERQ amino acid-rich with GYF domain-containing protein 2
Q6YN16	HSDL2	0.01597	0.0063	43.4031	6	HSDL2_HUMAN Hydroxysteroid dehydrogenase-like protein 2
Q6ZMG9-2	CERS6	0.02225	0.00641	31.1527	2	CERS6_HUMAN Isoform 2 of Ceramide synthase 6
Q6ZN30	BNC2	0.06124	0.00834	11.3185	1	BNC2_HUMAN Zinc finger protein basonuclin-2
Q6ZNB6	NFXL1	0.00649	0.00892	106.802	1	NFXL1_HUMAN NF-X1-type zinc finger protein NFXL1
Q6ZRP7	QSOX2	0.0399	0.0045	17.3721	2	QSOX2_HUMAN Sulfhydryl oxidase 2
Q6ZRV2	FAM83H	0.02282	0.00515	30.3745	2	FA83H_HUMAN Protein FAM83H
Q6ZT07	TBC1D9	0.03653	0.00999	18.9747	2	TBCD9_HUMAN TBC1 domain family member 9
Q6ZUX7	LHFPL2	0.028	0.00781	24.7553	1	LHPL2_HUMAN Lipoma HMGIC fusion partner-like 2 protein
Q6ZXV5	TMTC3	0.02214	0.01319	31.3075	1	TMTC3_HUMAN Transmembrane and TPR repeat-containing protein 3
Q712K3	UBE2R2	very slow	0.00456	>200	1	UB2R2_HUMAN Ubiquitin-conjugating enzyme E2 R2
Q71RC2-4	LARP4	0.00668	0.00831	103.765	5	LARP4_HUMAN Isoform 4 of La-related protein 4
Q71RG4	TMUB2	0.0432	0.01205	16.0451	1	TMUB2_HUMAN Transmembrane and ubiquitin-like domain-containing protein 2
Q75N03	CBLL1	0.05632	0.01743	12.3073	2	HAKAI_HUMAN E3 ubiquitin-protein ligase Hakai
Q7KZF4	SND1	0.02383	0.0061	29.0872	6	SND1_HUMAN Staphylococcal nuclease domain-containing protein 1
Q7KZI7	MARK2	0.01545	0.00518	44.8639	3	MARK2_HUMAN Serine/threonine-protein kinase MARK2
Q7KZN9	COX15	0.0321	0.00686	21.5934	2	COX15_HUMAN Cytochrome c oxidase assembly protein COX15 homolog
Q7L014	DDX46	0.04347	0.00609	15.9454	12	DDX46_HUMAN Probable ATP-dependent RNA helicase DDX46
Q7L0Y3	TRMT10C	0.04809	0.0087	14.4135	9	MRRP1_HUMAN Mitochondrial ribonuclease P protein 1
Q7L1Q6-3	BZW1	0.0177	0.00434	39.1609	15	BZW1_HUMAN Isoform 3 of Basic leucine zipper and W2 domain-containing protein 1
Q7L1W4	LRRC8D	0.08137	0.01094	8.51846	1	LRC8D_HUMAN Leucine-rich repeat-containing protein 8D
Q7L273	KCTD9	0.03079	0.00745	22.5121	1	KCTD9_HUMAN BTB/POZ domain-containing protein KCTD9
Q7L2E3-2	DHX30	0.02774	0.00564	24.9873	2	DHX30_HUMAN Isoform 2 of Putative ATP-dependent RNA helicase DHX30
Q7L2H7	EIF3M	0.08402	0.01497	8.24979	3	EIF3M_HUMAN Eukaryotic translation initiation factor 3 subunit M
Q7L2J0	MEPCE	0.01296	0.00441	53.4836	2	MEPCE_HUMAN 7SK snRNA methylphosphate capping enzyme
Q7L311	ARMCX2	0.02578	0.00877	26.887	1	ARMX2_HUMAN Armadillo repeat-containing X-linked protein 2
Q7L3T8	PARS2	0.03296	0.00876	21.03	1	SYPM_HUMAN Probable proline--tRNA ligase, mitochondrial
Q7L4I2	RSRC2	0.02037	0.00414	34.0278	2	RSRC2_HUMAN Arginine/serine-rich coiled-coil protein 2
Q7L576	CYFIP1	0.08806	0.01748	7.87131	1	CYFP1_HUMAN Cytoplasmic FMR1-interacting protein 1
Q7L590	MCM10	0.06749	0.00648	10.2704	4	MCM10_HUMAN Protein MCM10 homolog
Q7L5Y9	MAEA	0.03769	0.007	18.3907	1	MAEA_HUMAN Macrophage erythroblast attacher
Q7L7X3	TAOK1	0.03449	0.00852	20.097	3	TAOK1_HUMAN Serine/threonine-protein kinase TAO1
Q7L9L4-2	MOB1B	0.000814807	0.00469	>200	3	MOB1B_HUMAN Isoform 2 of MOB kinase activator 1B
Q7LBR1	CHMP1B	0.04627	0.02694	14.9805	5	CHM1B_HUMAN Charged multivesicular body protein 1b
Q7LFL8	CXXC5	0.1815	0.02324	3.81899	1	CXXC5_HUMAN CXXC-type zinc finger protein 5
Q7RTV0	PHF5A	0.05348	0.01555	12.9609	3	PHF5A_HUMAN PHD finger-like domain-containing protein 5A
Q7Z2K6	ERMP1	0.08115	0.00447	8.54155	1	ERMP1_HUMAN Endoplasmic reticulum metallopeptidase 1
Q7Z2T5	TRMT1L	0.05856	0.01275	11.8365	3	TRM1L_HUMAN TRMT1-like protein
Q7Z2W4	ZC3HAV1	0.00837	0.00593	82.8133	4	ZCCHV_HUMAN Zinc finger CCCH-type antiviral protein 1
Q7Z3E5	ARMC9	0.04256	0.00907	16.2864	2	ARMC9_HUMAN LisH domain-containing protein ARMC9
Q7Z404	TMC4	0.06863	0.01611	10.0998	1	TMC4_HUMAN Transmembrane channel-like protein 4
Q7Z406-2	MYH14	0.02033	0.00886	34.0948	2	MYH14_HUMAN Isoform 2 of Myosin-14
Q7Z417	NUFIP2	0.02522	0.0044	27.484	2	NUFP2_HUMAN Nuclear fragile X mental retardation-interacting protein 2
Q7Z460	CLASP1	0.04821	0.01127	14.3777	5	CLAP1_HUMAN CLIP-associating protein 1
Q7Z478	DHX29	0.01227	0.0051	56.4912	9	DHX29_HUMAN ATP-dependent RNA helicase DHX29
Q7Z569	BRAP	0.03172	0.00698	21.8521	1	BRAP_HUMAN BRCA1-associated protein
Q7Z5G4	GOLGA7	0.02176	0.00717	31.8542	2	GOGA7_HUMAN Golgin subfamily A member 7
Q7Z5K2-3	WAPAL	0.01802	0.00906	38.4654	1	WAPL_HUMAN Isoform 3 of Wings apart-like protein homolog
Q7Z5L9	IRF2BP2	0.03038	0.00195	22.8159	2	I2BP2_HUMAN Interferon regulatory factor 2-binding protein 2
Q7Z6B7	SRGAP1	0.03432	0.00767	20.1966	2	SRGP1_HUMAN SLIT-ROBO Rho GTPase-activating protein 1
Q7Z6E9	RBBP6	very slow	0.01168	>200	9	RBBP6_HUMAN E3 ubiquitin-protein ligase RBBP6
Q7Z739	YTHDF3	0.01386	0.00565	50.0106	2	YTHD3_HUMAN YTH domain family protein 3
Q7Z769	SLC35E3	0.03221	0.00706	21.5196	1	S35E3_HUMAN Solute carrier family 35 member E3
Q7Z7A1	CNTRL	0.08012	0.01125	8.65136	1	CNTRL_HUMAN Centriolin
Q7Z7K0	CMC1	0.02935	0.00336	23.6166	1	COXM1_HUMAN COX assembly mitochondrial protein homolog
Q86SQ4-3	GPR126	0.04017	0.00628	17.2553	1	GP126_HUMAN Isoform 3 of G-protein coupled receptor 126
Q86T82	USP37	0.01746	0.00821	39.6992	3	UBP37_HUMAN Ubiquitin carboxyl-terminal hydrolase 37
Q86TU7	SETD3	0.10273	0.01619	6.74727	1	SETD3_HUMAN Histone-lysine N-methyltransferase setd3
Q86U06	RBM23	0.11359	0.01719	6.10218	1	RBM23_HUMAN Probable RNA-binding protein 23
Q86U38	NOP9	0.03037	0.00616	22.8234	1	NOP9_HUMAN Nucleolar protein 9
Q86UD0	SAPCD2	0.0882	0.00247	7.85881	1	SAPC2_HUMAN Suppressor APC domain-containing protein 2
Q86UD5	SLC9B2	0.01177	0.00598	58.891	1	SL9B2_HUMAN Mitochondrial sodium/hydrogen exchanger 9B2
Q86UE4	MTDH	0.01267	0.0076	54.7077	7	LYRIC_HUMAN Protein LYRIC
Q86UE8	TLK2	0.03257	0.00911	21.2818	1	TLK2_HUMAN Serine/threonine-protein kinase tousled-like 2
Q86UK7	ZNF598	0.01661	0.00326	41.7307	2	ZN598_HUMAN Zinc finger protein 598
Q86UP2	KTN1	0.02319	0.00837	29.8899	9	KTN1_HUMAN Kinectin
Q86UU0	BCL9L	0.06642	0.00673	10.4358	2	BCL9L_HUMAN B-cell CLL/lymphoma 9-like protein
Q86V81	ALYREF	0.07624	0.01799	9.09165	1	THOC4_HUMAN THO complex subunit 4
Q86VF2-5	IGFN1	0.03106	0.00359	22.3164	1	IGFN1_HUMAN Isoform 5 of Immunoglobulin-like and fibronectin type III domain-containing protein 1
Q86VI3	IQGAP3	0.02245	0.00534	30.8752	2	IQGA3_HUMAN Ras GTPase-activating-like protein IQGAP3
Q86VM9	ZC3H18	0.01565	0.00848	44.2906	6	ZCH18_HUMAN Zinc finger CCCH domain-containing protein 18
Q86VP3-2	PACS2	0.02787	0.01392	24.8707	1	PACS2_HUMAN Isoform 2 of Phosphofurin acidic cluster sorting protein 2
Q86VP6	CAND1	0.0127	0.00285	54.5785	12	CAND1_HUMAN Cullin-associated NEDD8-dissociated protein 1
Q86VW0	SESTD1	0.01221	0.00678	56.7688	1	SESD1_HUMAN SEC14 domain and spectrin repeat-containing protein 1
Q86VY4	TSPYL5	very slow	0.00946	>200	1	TSYL5_HUMAN Testis-specific Y-encoded-like protein 5
Q86W56	PARG	0.0216	0.00766	32.0901	1	PARG_HUMAN Poly(ADP-ribose) glycohydrolase
Q86WJ1	CHD1L	0.03084	0.00554	22.4756	3	CHD1L_HUMAN Chromodomain-helicase-DNA-binding protein 1-like
Q86X27	RALGPS2	0.01718	0.00541	40.3462	1	RGPS2_HUMAN Ras-specific guanine nucleotide-releasing factor RalGPS2
Q86XI2-2	NCAPG2	0.09459	0.00804	7.32791	2	CNDG2_HUMAN Isoform 2 of Condensin-2 complex subunit G2
Q86XL3	ANKLE2	0.01286	0.00827	53.8995	3	ANKL2_HUMAN Ankyrin repeat and LEM domain-containing protein 2
Q86XP3	DDX42	0.0255	0.00746	27.1822	4	DDX42_HUMAN ATP-dependent RNA helicase DDX42
Q86Y56	HEATR2	0.05075	0.00788	13.6581	1	HEAT2_HUMAN HEAT repeat-containing protein 2
Q86YH6	PDSS2	0.01694	0.00671	40.9178	1	DLP1_HUMAN Decaprenyl-diphosphate synthase subunit 2
Q86YP4-3	GATAD2A	0.00853	0.0078	81.2599	1	P66A_HUMAN Isoform 3 of Transcriptional repressor p66-alpha
Q86YQ8	CPNE8	0.0159	0.00423	43.5942	1	CPNE8_HUMAN Copine-8
Q8IU81	IRF2BP1	0.01852	0.00401	37.427	2	I2BP1_HUMAN Interferon regulatory factor 2-binding protein 1
Q8IUC4	RHPN2	0.02912	0.00693	23.8031	9	RHPN2_HUMAN Rhophilin-2
Q8IUD2	ERC1	0.02105	0.00463	32.9286	4	RB6I2_HUMAN ELKS/Rab6-interacting/CAST family member 1
Q8IUF8	MINA	0.06524	0.01354	10.6246	3	MINA_HUMAN Bifunctional lysine-specific demethylase and histidyl-hydroxylase MINA
Q8IUH4	ZDHHC13	very slow	0.0127	>200	1	ZDH13_HUMAN Palmitoyltransferase ZDHHC13
Q8IV36	HID1	0.01357	0.00693	51.0794	1	HID1_HUMAN Protein HID1
Q8IVD9	NUDCD3	0.00191	0.00572	>200	2	NUDC3_HUMAN NudC domain-containing protein 3
Q8IVF5-2	TIAM2	0.07662	0.0068	9.04656	1	TIAM2_HUMAN Isoform 2 of T-lymphoma invasion and metastasis-inducing protein 2
Q8IVH2	FOXP4	0.03235	0.00429	21.4265	2	FOXP4_HUMAN Forkhead box protein P4
Q8IVH8	MAP4K3	very slow	0.00982	>200	2	M4K3_HUMAN Mitogen-activated protein kinase kinase kinase kinase 3
Q8IVM0-2	CCDC50	0.00508	0.00582	136.446	1	CCD50_HUMAN Isoform 2 of Coiled-coil domain-containing protein 50
Q8IVT2	MISP	0.02866	0.00578	24.1852	1	MISP_HUMAN Mitotic interactor and substrate of PLK1
Q8IWA4	MFN1	0.04016	0.00895	17.2596	1	MFN1_HUMAN Mitofusin-1
Q8IWC1	MAP7D3	0.01733	0.00381	39.997	4	MA7D3_HUMAN MAP7 domain-containing protein 3
Q8IWE4	DCUN1D3	very slow	0.00674	>200	1	DCNL3_HUMAN DCN1-like protein 3
Q8IWL3	HSCB	very slow	0.0066	>200	1	HSC20_HUMAN Iron-sulfur cluster co-chaperone protein HscB, mitochondrial
Q8IWR0	ZC3H7A	0.01727	0.00371	40.1359	2	Z3H7A_HUMAN Zinc finger CCCH domain-containing protein 7A
Q8IWS0	PHF6	0.03086	0.0014	22.461	2	PHF6_HUMAN PHD finger protein 6
Q8IWU5	SULF2	0.08197	0.00852	8.45611	9	SULF2_HUMAN Extracellular sulfatase Sulf-2
Q8IWX8	CHERP	0.06224	0.00779	11.1367	2	CHERP_HUMAN Calcium homeostasis endoplasmic reticulum protein
Q8IWZ8	SUGP1	0.01238	0.0041	55.9893	4	SUGP1_HUMAN SURP and G-patch domain-containing protein 1
Q8IX01	SUGP2	0.03226	0.00559	21.4863	5	SUGP2_HUMAN SURP and G-patch domain-containing protein 2
Q8IX03	WWC1	0.03809	0.00861	18.1976	1	KIBRA_HUMAN Protein KIBRA
Q8IX04	UEVLD	0.03506	0.01906	19.7703	1	UEVLD_HUMAN Ubiquitin-conjugating enzyme E2 variant 3
Q8IX18	DHX40	0.04371	0.00602	15.8579	4	DHX40_HUMAN Probable ATP-dependent RNA helicase DHX40
Q8IXB1	DNAJC10	0.0642	0.01768	10.7967	2	DJC10_HUMAN DnaJ homolog subfamily C member 10
Q8IXH7	NELFCD	0.08592	0.00656	8.06736	1	NELFD_HUMAN Negative elongation factor C/D
Q8IXM3	MRPL41	0.14509	0.00482	4.77736	1	RM41_HUMAN 39S ribosomal protein L41, mitochondrial
Q8IXQ4	GPALPP1	0.02213	0.00337	31.3216	2	GPAM1_HUMAN GPALPP motifs-containing protein 1
Q8IXU6	SLC35F2	0.04418	0.00755	15.6892	1	S35F2_HUMAN Solute carrier family 35 member F2
Q8IY33	MICALL2	0.01565	0.00254	44.2906	1	MILK2_HUMAN MICAL-like protein 2
Q8IY37	DHX37	0.02569	0.00683	26.9812	2	DHX37_HUMAN Probable ATP-dependent RNA helicase DHX37
Q8IY67-2	RAVER1	0.02859	0.00511	24.2444	1	RAVR1_HUMAN Isoform 2 of Ribonucleoprotein PTB-binding 1
Q8IY81	FTSJ3	0.01617	0.00607	42.8662	3	SPB1_HUMAN pre-rRNA processing protein FTSJ3
Q8IYB3	SRRM1	very slow	0.00306	>200	4	SRRM1_HUMAN Serine/arginine repetitive matrix protein 1
Q8IYB5	SMAP1	0.00683	0.0041	101.486	2	SMAP1_HUMAN Stromal membrane-associated protein 1
Q8IYL3	C1orf174	0.02869	0.01467	24.1599	1	CA174_HUMAN UPF0688 protein C1orf174
Q8IYU8	MICU2	0.10097	0.0166	6.86488	3	MICU2_HUMAN Calcium uptake protein 2, mitochondrial
Q8IZ69	TRMT2A	0.03148	0.01211	22.0187	1	TRM2A_HUMAN tRNA (uracil-5-)-methyltransferase homolog A
Q8IZ81	ELMOD2	0.01803	0.00752	38.4441	1	ELMD2_HUMAN ELMO domain-containing protein 2
Q8IZH2	XRN1	0.0038	0.00284	182.407	1	XRN1_HUMAN 5'-3' exoribonuclease 1
Q8N0T1	C8orf59	0.08148	0.00676	8.50696	1	CH059_HUMAN Uncharacterized protein C8orf59
Q8N0U8	VKORC1L1	0.01659	0.00736	41.781	2	VKORL_HUMAN Vitamin K epoxide reductase complex subunit 1-like protein 1
Q8N0Y7	PGAM4	0.01793	0.02287	38.6585	1	PGAM4_HUMAN Probable phosphoglycerate mutase 4
Q8N0Z3	SPICE1	0.03123	0.00749	22.1949	1	SPICE_HUMAN Spindle and centriole-associated protein 1
Q8N138	ORMDL3	0.05488	0.00598	12.6302	1	ORML3_HUMAN ORM1-like protein 3
Q8N163	CCAR2	0.05709	0.00714	12.1413	1	CCAR2_HUMAN Cell cycle and apoptosis regulator protein 2
Q8N183	NDUFAF2	0.02523	0.01402	27.4731	2	MIMIT_HUMAN Mimitin, mitochondrial
Q8N1G2	CMTR1	0.04349	0.0045	15.9381	1	CMTR1_HUMAN Cap-specific mRNA (nucleoside-2'-O-)-methyltransferase 1
Q8N1G4	LRRC47	0.01847	0.00735	37.5283	2	LRC47_HUMAN Leucine-rich repeat-containing protein 47
Q8N2F6	ARMC10	0.03157	0.00595	21.9559	1	ARM10_HUMAN Armadillo repeat-containing protein 10
Q8N2H4	SYS1	0.01609	0.00634	43.0794	1	SYS1_HUMAN Protein SYS1 homolog
Q8N2M8	CLASRP	0.02429	0.00546	28.5363	2	CLASR_HUMAN CLK4-associating serine/arginine rich protein
Q8N2W9	PIAS4	0.04743	0.00604	14.6141	1	PIAS4_HUMAN E3 SUMO-protein ligase PIAS4
Q8N335	GPD1L	0.03022	0.01186	22.9367	5	GPD1L_HUMAN Glycerol-3-phosphate dehydrogenase 1-like protein
Q8N370-3	SLC43A2	0.05081	0.0053	13.6419	3	LAT4_HUMAN Isoform 3 of Large neutral amino acids transporter small subunit 4
Q8N3J9	ZNF664	0.08038	0.00846	8.62338	1	ZN664_HUMAN Zinc finger protein 664
Q8N3U4-2	STAG2	0.03786	0.01329	18.3082	3	STAG2_HUMAN Isoform 2 of Cohesin subunit SA-2
Q8N490	PNKD	0.01314	0.00619	52.7509	1	PNKD_HUMAN Probable hydrolase PNKD
Q8N4C8	MINK1	0.03587	0.00529	19.3239	2	MINK1_HUMAN Misshapen-like kinase 1
Q8N4S9	MARVELD2	0.01241	0.00673	55.8539	1	MALD2_HUMAN MARVEL domain-containing protein 2
Q8N4V1-2	MMGT1	0.05401	0.01911	12.8337	1	MMGT1_HUMAN Isoform 2 of Membrane magnesium transporter 1
Q8N511	TMEM199	0.01712	0.0053	40.4876	1	TM199_HUMAN Transmembrane protein 199
Q8N573	OXR1	0.04307	0.01766	16.0935	1	OXR1_HUMAN Oxidation resistance protein 1
Q8N5C6	SRBD1	0.01438	0.00675	48.2022	1	SRBD1_HUMAN S1 RNA-binding domain-containing protein 1
Q8N5F7	NKAP	very slow	0.00588	>200	3	NKAP_HUMAN NF-kappa-B-activating protein
Q8N5G2	TMEM57	0.00789	0.00549	87.8514	2	MACOI_HUMAN Macoilin
Q8N5I4	DHRSX	0.02751	0.0042	25.1962	1	DHRSX_HUMAN Dehydrogenase/reductase SDR family member on chromosome X
Q8N5K1	CISD2	0.05207	0.00868	13.3118	2	CISD2_HUMAN CDGSH iron-sulfur domain-containing protein 2
Q8N5L8	RPP25L	0.04497	0.00355	15.4135	1	RP25L_HUMAN Ribonuclease P protein subunit p25-like protein
Q8N5M4	TTC9C	very slow	0.00155	>200	2	TTC9C_HUMAN Tetratricopeptide repeat protein 9C
Q8N5Y8-3	PARP16	0.06458	0.01528	10.7332	1	PAR16_HUMAN Isoform 3 of Mono [ADP-ribose] polymerase PARP16
Q8N684-3	CPSF7	0.03968	0.0134	17.4684	2	CPSF7_HUMAN Isoform 3 of Cleavage and polyadenylation specificity factor subunit 7
Q8N6H7	ARFGAP2	0.0194	0.00629	35.7292	2	ARFG2_HUMAN ADP-ribosylation factor GTPase-activating protein 2
Q8N6L1-2	KRTCAP2	0.06634	0.00946	10.4484	1	KTAP2_HUMAN Isoform 2 of Keratinocyte-associated protein 2
Q8N6M3	FITM2	0.00307	0.00722	>200	2	FITM2_HUMAN Fat storage-inducing transmembrane protein 2
Q8N6R0	METTL13	0.04949	0.01475	14.0058	1	MET13_HUMAN Methyltransferase-like protein 13
Q8N766	EMC1	0.02426	0.00538	28.5716	3	EMC1_HUMAN ER membrane protein complex subunit 1
Q8N7B9-2	EFCAB3	0.03688	0.00388	18.7947	1	EFCB3_HUMAN Isoform 2 of EF-hand calcium-binding domain-containing protein 3
Q8N7H5	PAF1	very slow	0.0212	>200	3	PAF1_HUMAN RNA polymerase II-associated factor 1 homolog
Q8N7X1	RBMXL3	0.01552	0.00592	44.6615	1	RMXL3_HUMAN RNA-binding motif protein, X-linked-like-3
Q8N806	UBR7	0.00809	0.01009	85.6795	1	UBR7_HUMAN Putative E3 ubiquitin-protein ligase UBR7
Q8N8R3	SLC25A29	0.05332	0.0059	12.9998	1	MCATL_HUMAN Mitochondrial carnitine/acylcarnitine carrier protein CACL
Q8N8S7	ENAH	0.05417	0.01022	12.7958	3	ENAH_HUMAN Protein enabled homolog
Q8N9B5	JMY	0.02122	0.00693	32.6648	1	JMY_HUMAN Junction-mediating and -regulatory protein
Q8N9I9-2	DTX3	0.05452	0.00612	12.7136	1	DTX3_HUMAN Isoform 2 of Probable E3 ubiquitin-protein ligase DTX3
Q8N9U0	TC2N	0.07932	0.01131	8.73862	1	TAC2N_HUMAN Tandem C2 domains nuclear protein
Q8NBJ4	GOLM1	0.08006	0.00446	8.65785	2	GOLM1_HUMAN Golgi membrane protein 1
Q8NBL1	POGLUT1	0.05524	0.01338	12.5479	2	PGLT1_HUMAN Protein O-glucosyltransferase 1
Q8NBN3	TMEM87A	0.03547	0.00972	19.5418	1	TM87A_HUMAN Transmembrane protein 87A
Q8NBS9	TXNDC5	0.01481	0.00745	46.8026	7	TXND5_HUMAN Thioredoxin domain-containing protein 5
Q8NBT2	SPC24	0.01617	0.00901	42.8662	1	SPC24_HUMAN Kinetochore protein Spc24
Q8NBU5	ATAD1	0.01286	0.00653	53.8995	2	ATAD1_HUMAN ATPase family AAA domain-containing protein 1
Q8NBZ7-2	UXS1	0.1162	0.02045	5.96512	1	UXS1_HUMAN Isoform 2 of UDP-glucuronic acid decarboxylase 1
Q8NC42	RNF149	0.05927	0.00684	11.6947	1	RN149_HUMAN E3 ubiquitin-protein ligase RNF149
Q8NC51	SERBP1	0.04439	0.00831	15.6149	9	PAIRB_HUMAN Plasminogen activator inhibitor 1 RNA-binding protein
Q8NC54	KCT2	0.09664	0.00976	7.17247	1	KCT2_HUMAN Keratinocyte-associated transmembrane protein 2
Q8NC56	LEMD2	0.05455	0.0121	12.7066	2	LEMD2_HUMAN LEM domain-containing protein 2
Q8NCA5	FAM98A	0.04977	0.00277	13.927	3	FA98A_HUMAN Protein FAM98A
Q8NCE2	MTMR14	0.03875	0.00771	17.8877	2	MTMRE_HUMAN Myotubularin-related protein 14
Q8NCL4	GALNT6	0.02687	0.005	25.7963	5	GALT6_HUMAN Polypeptide N-acetylgalactosaminyltransferase 6
Q8NCN4	RNF169	very slow	0.0064	>200	1	RN169_HUMAN E3 ubiquitin-protein ligase RNF169
Q8NCN5	PDPR	0.04532	0.00699	15.2945	1	PDPR_HUMAN Pyruvate dehydrogenase phosphatase regulatory subunit, mitochondrial
Q8ND04-2	SMG8	0.04338	0.00418	15.9785	2	SMG8_HUMAN Isoform 2 of Protein SMG8
Q8ND56-2	LSM14A	very slow	0.01205	>200	3	LS14A_HUMAN Isoform 2 of Protein LSM14 homolog A
Q8NDD1-3	C1orf131	0.01745	0.01662	39.7219	1	CA131_HUMAN Isoform 3 of Uncharacterized protein C1orf131
Q8NDM7	WDR96	0.04005	0.01589	17.307	1	WDR96_HUMAN WD repeat-containing protein 96
[truncated: 1,025 more rows]

## Sheet: 3-MA-treated experiment
Table S1c - Quantifying the dynamics of 2895 proteins and their half-lives in 3-MA-treated MCF-7 cells
Uniprot ID	Gene Symbol	Degradation rate (h-1)	Standard deviation	Half-life (h)	Unique peptide hits	Annotation
A0AV96	RBM47	0.06804	0.00461	10.1873	2	RBM47_HUMAN RNA-binding protein 47
A0FGR8-6	ESYT2	0.01962	0.00646	35.3286	2	ESYT2_HUMAN Isoform 6 of Extended synaptotagmin-2
A1L0T0	ILVBL	0.03936	0.00421	17.6104	2	ILVBL_HUMAN Acetolactate synthase-like protein
A2A3N6	PIPSL	0.23396	0.01825	2.96267	3	PIPSL_HUMAN Putative PIP5K1A and PSMD4-like protein
A3KMH1	VWA8	very slow	0.00814	>200	1	VWA8_HUMAN von Willebrand factor A domain-containing protein 8
A3KN83	SBNO1	0.04551	0.00505	15.2307	1	SBNO1_HUMAN Protein strawberry notch homolog 1
A4D1E9	GTPBP10	0.0834	0.00644	8.31112	5	GTPBA_HUMAN GTP-binding protein 10
A6NCI4	VWA3A	0.11875	0.00828	5.83703	1	VWA3A_HUMAN von Willebrand factor A domain-containing protein 3A
A6NDG6	PGP	0.06239	0.01377	11.1099	1	PGP_HUMAN Phosphoglycolate phosphatase
A6NE01	FAM186A	0.03811	0.00883	18.1881	2	F186A_HUMAN Protein FAM186A
A6NIZ1		very slow	0.00962	>200	3	RP1BL_HUMAN Ras-related protein Rap-1b-like protein
A6NKH3	RPL37L	0.09015	0.01968	7.68882	2	RL37L_HUMAN Putative 60S ribosomal protein L37a-like
A8MTT3	CEBPZOS	0.03073	0.00356	22.556	1	A8MTT3_HUMAN Protein CEBPZOS
A8MWD9	SNRPGP15	0.10798	0.01393	6.41922	1	RUXGL_HUMAN Small nuclear ribonucleoprotein G-like protein
A8MXP9	MATR3	0.04327	0.00821	16.0191	1	A8MXP9_HUMAN Matrin-3
A9UHW6-3	MIF4GD	0.07578	0.00943	9.14684	1	MI4GD_HUMAN Isoform 3 of MIF4G domain-containing protein
B4DKA8	USP8	0.02141	0.00762	32.3749	1	B4DKA8_HUMAN Ubiquitin carboxyl-terminal hydrolase
B4DTU4	LIG1	0.04198	0.01087	16.5114	1	B4DTU4_HUMAN DNA ligase
B5ME19	EIF3CL	0.25728	0.06455	2.69414	2	EIFCL_HUMAN Eukaryotic translation initiation factor 3 subunit C-like protein
C9J2U4	TAMM41	0.04013	0.00398	17.2725	1	C9J2U4_HUMAN Chromosome 3 open reading frame 31, isoform CRA_f
E7ETH6	ZNF587B	0.15581	0.01693	4.44867	1	Z587B_HUMAN Zinc finger protein 587B
E9PN48	ARFGAP2	0.06119	0.00731	11.3278	2	E9PN48_HUMAN ADP-ribosylation factor GTPase-activating protein 2 (Fragment)
E9PRG8	C11orf48	0.06926	0.00808	10.0079	2	E9PRG8_HUMAN Uncharacterized protein C11orf48
F8WCI5	C3orf33	0.00908	0.01115	76.3378	1	F8WCI5_HUMAN Uncharacterized protein C3orf33
G3V203	RPL18	0.19974	0.06022	3.47025	1	G3V203_HUMAN 60S ribosomal protein L18
G3V4T6	GSTZ1	0.02011	0.008	34.4678	2	G3V4T6_HUMAN Maleylacetoacetate isomerase
H0Y2V6	CEP170	0.03088	0.01002	22.4465	1	H0Y2V6_HUMAN Centrosomal protein of 170 kDa (Fragment)
H0YB30	PCNXL2	0.15976	0.01076	4.33868	1	H0YB30_HUMAN Pecanex-like protein 2 (Fragment)
H0YBE0	MTDH	0.01536	0.00808	45.1268	1	H0YBE0_HUMAN Protein LYRIC (Fragment)
H0YNU7	CERS2	very slow	0.01835	>200	1	H0YNU7_HUMAN Ceramide synthase 2
J3KTN0	EIF4A1	0.01785	0.01931	38.8318	1	J3KTN0_HUMAN Eukaryotic initiation factor 4A-I (Fragment)
K7EMZ9	LSM14A	0.05877	0.00913	11.7942	1	K7EMZ9_HUMAN Protein LSM14 homolog A (Fragment)
O00115	DNASE2	0.08247	0.00812	8.40484	2	DNS2A_HUMAN Deoxyribonuclease-2-alpha
O00148	DDX39A	0.03457	0.00475	20.0505	1	DX39A_HUMAN ATP-dependent RNA helicase DDX39A
O00151	PDLIM1	0.02575	0.01081	26.9183	4	PDLI1_HUMAN PDZ and LIM domain protein 1
O00154	ACOT7	very slow	0.00996	>200	1	BACH_HUMAN Cytosolic acyl coenzyme A thioester hydrolase
O00159	MYO1C	0.06048	0.01403	11.4608	2	MYO1C_HUMAN Unconventional myosin-Ic
O00170	AIP	0.02741	0.00427	25.2881	4	AIP_HUMAN AH receptor-interacting protein
O00186	STXBP3	0.02975	0.00421	23.2991	6	STXB3_HUMAN Syntaxin-binding protein 3
O00203	AP3B1	0.01997	0.00673	34.7094	3	AP3B1_HUMAN AP-3 complex subunit beta-1
O00212	RHOD	0.06277	0.00614	11.0427	2	RHOD_HUMAN Rho-related GTP-binding protein RhoD
O00231-2	PSMD11	0.14217	0.02302	4.87548	4	PSD11_HUMAN Isoform 2 of 26S proteasome non-ATPase regulatory subunit 11
O00232	PSMD12	0.25366	0.04673	2.73258	4	PSD12_HUMAN 26S proteasome non-ATPase regulatory subunit 12
O00233	PSMD9	0.03062	0.00994	22.6371	1	PSMD9_HUMAN 26S proteasome non-ATPase regulatory subunit 9
O00257	CBX4	0.08032	0.00413	8.62982	5	CBX4_HUMAN E3 SUMO-protein ligase CBX4
O00267	SUPT5H	0.02683	0.0081	25.8348	4	SPT5H_HUMAN Transcription elongation factor SPT5
O00299	CLIC1	0.06876	0.00909	10.0807	1	CLIC1_HUMAN Chloride intracellular channel protein 1
O00391	QSOX1	0.28844	0.06878	2.40309	1	QSOX1_HUMAN Sulfhydryl oxidase 1
O00400	SLC33A1	0.01404	0.01328	49.3695	4	ACATN_HUMAN Acetyl-coenzyme A transporter 1
O00410-3	IPO5	0.02822	0.0072	24.5623	4	IPO5_HUMAN Isoform 3 of Importin-5
O00422	SAP18	0.11522	0.00365	6.01586	4	SAP18_HUMAN Histone deacetylase complex subunit SAP18
O00429-6	DNM1L	0.03501	0.00454	19.7985	4	DNM1L_HUMAN Isoform 6 of Dynamin-1-like protein
O00458	IFRD1	0.10472	0.01071	6.61905	1	IFRD1_HUMAN Interferon-related developmental regulator 1
O00471	EXOC5	0.0376	0.00504	18.4348	1	EXOC5_HUMAN Exocyst complex component 5
O00483	NDUFA4	0.09686	0.00788	7.15618	2	NDUA4_HUMAN NADH dehydrogenase [ubiquinone] 1 alpha subcomplex subunit 4
O00487	PSMD14	0.10838	0.01594	6.39553	2	PSDE_HUMAN 26S proteasome non-ATPase regulatory subunit 14
O00506	STK25	0.11395	0.00944	6.08291	4	STK25_HUMAN Serine/threonine-protein kinase 25
O00515	LAD1	0.0157	0.0055	44.1495	8	LAD1_HUMAN Ladinin-1
O00541	PES1	0.07427	0.00638	9.3328	9	PESC_HUMAN Pescadillo homolog
O00560	SDCBP	0.07651	0.0076	9.05956	2	SDCB1_HUMAN Syntenin-1
O00566	MPHOSPH10	0.04209	0.00582	16.4682	3	MPP10_HUMAN U3 small nucleolar ribonucleoprotein protein MPP10
O00570	SOX1	0.11157	0.00575	6.21267	2	SOX1_HUMAN Transcription factor SOX-1
O00571	DDX3X	0.07372	0.01063	9.40243	9	DDX3X_HUMAN ATP-dependent RNA helicase DDX3X
O00629	KPNA4	0.0211	0.00675	32.8506	3	IMA3_HUMAN Importin subunit alpha-3
O00743-3	PPP6C	0.0971	0.01076	7.13849	3	PPP6_HUMAN Isoform 3 of Serine/threonine-protein phosphatase 6 catalytic subunit
O00757	FBP2	0.02179	0.00565	31.8103	1	F16P2_HUMAN Fructose-1,6-bisphosphatase isozyme 2
O00762	UBE2C	0.13155	0.01165	5.26908	5	UBE2C_HUMAN Ubiquitin-conjugating enzyme E2 C
O00767	SCD	0.23933	0.00881	2.8962	4	ACOD_HUMAN Acyl-CoA desaturase
O14493	CLDN4	0.07844	0.01145	8.83665	1	CLD4_HUMAN Claudin-4
O14497	ARID1A	0.02895	0.00665	23.9429	4	ARI1A_HUMAN AT-rich interactive domain-containing protein 1A
O14530	TXNDC9	0.02631	0.00758	26.3454	1	TXND9_HUMAN Thioredoxin domain-containing protein 9
O14548	COX7A2L	0.14864	0.01277	4.66326	4	COX7R_HUMAN Cytochrome c oxidase subunit 7A-related protein, mitochondrial
O14562	UBFD1	0.00948	0.00633	73.1168	5	UBFD1_HUMAN Ubiquitin domain-containing protein UBFD1
O14578-4	CIT	0.07919	0.00578	8.75296	2	CTRO_HUMAN Isoform 4 of Citron Rho-interacting kinase
O14617-5	AP3D1	0.02463	0.00649	28.1424	2	AP3D1_HUMAN Isoform 5 of AP-3 complex subunit delta-1
O14656	TOR1A	0.00484	0.00616	143.212	4	TOR1A_HUMAN Torsin-1A
O14657	TOR1B	0.02845	0.00552	24.3637	4	TOR1B_HUMAN Torsin-1B
O14672	ADAM10	0.13492	0.01138	5.13747	1	ADA10_HUMAN Disintegrin and metalloproteinase domain-containing protein 10
O14683	TP53I11	0.06603	0.00571	10.4975	2	P5I11_HUMAN Tumor protein p53-inducible protein 11
O14734	ACOT8	0.01623	0.00791	42.7078	1	ACOT8_HUMAN Acyl-coenzyme A thioesterase 8
O14737	PDCD5	0.11232	0.01599	6.17118	2	PDCD5_HUMAN Programmed cell death protein 5
O14744	PRMT5	0.10004	0.0196	6.9287	2	ANM5_HUMAN Protein arginine N-methyltransferase 5
O14745	SLC9A3R1	0.03401	0.00551	20.3807	4	NHRF1_HUMAN Na(+)/H(+) exchange regulatory cofactor NHE-RF1
O14776	TCERG1	0.02784	0.00309	24.8975	10	TCRG1_HUMAN Transcription elongation regulator 1
O14777	NDC80	0.12439	0.00776	5.57237	3	NDC80_HUMAN Kinetochore protein NDC80 homolog
O14786	NRP1	0.13984	0.00962	4.95672	3	NRP1_HUMAN Neuropilin-1
O14818	PSMA7	0.32112	0.03956	2.15853	2	PSA7_HUMAN Proteasome subunit alpha type-7
O14832	PHYH	0.09522	0.00631	7.27943	4	PAHX_HUMAN Phytanoyl-CoA dioxygenase, peroxisomal
O14874	BCKDK	0.05437	0.00693	12.7487	2	BCKD_HUMAN [3-methyl-2-oxobutanoate dehydrogenase [lipoamide]] kinase, mitochondrial
O14908	GIPC1	0.07513	0.00748	9.22597	2	GIPC1_HUMAN PDZ domain-containing protein GIPC1
O14910	LIN7A	0.12126	0.01057	5.71621	1	LIN7A_HUMAN Protein lin-7 homolog A
O14929	HAT1	0.02508	0.00414	27.6374	6	HAT1_HUMAN Histone acetyltransferase type B catalytic subunit
O14949	UQCRQ	0.14053	0.01815	4.93238	1	QCR8_HUMAN Cytochrome b-c1 complex subunit 8
O14950	MYL12B	0.19854	0.03254	3.49122	3	ML12B_HUMAN Myosin regulatory light chain 12B
O14964	HGS	0.05032	0.00793	13.7748	5	HGS_HUMAN Hepatocyte growth factor-regulated tyrosine kinase substrate
O14965	AURKA	0.13334	0.00793	5.19834	4	AURKA_HUMAN Aurora kinase A
O14974	PPP1R12A	0.02008	0.00835	34.5193	4	MYPT1_HUMAN Protein phosphatase 1 regulatory subunit 12A
O14975	SLC27A2	0.03743	0.0049	18.5185	4	S27A2_HUMAN Very long-chain acyl-CoA synthetase
O14976	GAK	0.01473	0.00867	47.0568	7	GAK_HUMAN Cyclin-G-associated kinase
O14979	HNRNPDL	0.05445	0.00588	12.73	3	HNRDL_HUMAN Heterogeneous nuclear ribonucleoprotein D-like
O14980	XPO1	0.03108	0.00419	22.302	8	XPO1_HUMAN Exportin-1
O15014	ZNF609	0.07686	0.00703	9.01831	3	ZN609_HUMAN Zinc finger protein 609
O15020	SPTBN2	0.0169	0.00799	41.0146	11	SPTN2_HUMAN Spectrin beta chain, non-erythrocytic 2
O15021	MAST4	0.05986	0.00493	11.5795	1	MAST4_HUMAN Microtubule-associated serine/threonine-protein kinase 4
O15042	U2SURP	0.03939	0.01634	17.597	5	SR140_HUMAN U2 snRNP-associated SURP motif-containing protein
O15091	KIAA0391	0.07135	0.00442	9.71475	8	MRRP3_HUMAN Mitochondrial ribonuclease P protein 3
O15119	TBX3	0.15546	0.00799	4.45869	3	TBX3_HUMAN T-box transcription factor TBX3
O15126	SCAMP1	0.02357	0.00566	29.408	1	SCAM1_HUMAN Secretory carrier-associated membrane protein 1
O15143	ARPC1B	0.00946	0.02664	73.2714	1	ARC1B_HUMAN Actin-related protein 2/3 complex subunit 1B
O15144	ARPC2	0.07517	0.0163	9.22106	3	ARPC2_HUMAN Actin-related protein 2/3 complex subunit 2
O15145	ARPC3	0.00478	0.00848	145.01	3	ARPC3_HUMAN Actin-related protein 2/3 complex subunit 3
O15162	PLSCR1	0.04603	0.00376	15.0586	3	PLS1_HUMAN Phospholipid scramblase 1
O15164	TRIM24	0.05291	0.00618	13.1005	4	TIF1A_HUMAN Transcription intermediary factor 1-alpha
O15226-2	NKRF	0.05288	0.00699	13.1079	2	NKRF_HUMAN Isoform 2 of NF-kappa-B-repressing factor
O15231-6	ZNF185	0.01946	0.00846	35.6191	3	ZN185_HUMAN Isoform 6 of Zinc finger protein 185
O15235	MRPS12	0.12362	0.01698	5.60708	1	RT12_HUMAN 28S ribosomal protein S12, mitochondrial
O15269	SPTLC1	0.06129	0.00374	11.3093	3	SPTC1_HUMAN Serine palmitoyltransferase 1
O15270	SPTLC2	0.02215	0.00348	31.2933	3	SPTC2_HUMAN Serine palmitoyltransferase 2
O15297	PPM1D	0.13161	0.00912	5.26668	7	PPM1D_HUMAN Protein phosphatase 1D
O15305	PMM2	0.04978	0.00757	13.9242	2	PMM2_HUMAN Phosphomannomutase 2
O15321	TM9SF1	0.01445	0.01505	47.9687	1	TM9S1_HUMAN Transmembrane 9 superfamily member 1
O15347	HMGB3	0.04253	0.00342	16.2978	8	HMGB3_HUMAN High mobility group protein B3
O15355	PPM1G	0.095	0.00181	7.29629	3	PPM1G_HUMAN Protein phosphatase 1G
O15372	EIF3H	0.06403	0.00914	10.8254	8	EIF3H_HUMAN Eukaryotic translation initiation factor 3 subunit H
O15417	TNRC18	0.11104	0.01198	6.24232	2	TNC18_HUMAN Trinucleotide repeat-containing gene 18 protein
O15446-2	CD3EAP	0.03073	0.00843	22.556	1	RPA34_HUMAN Isoform 2 of DNA-directed RNA polymerase I subunit RPA34
O15460	P4HA2	0.04665	0.00623	14.8585	1	P4HA2_HUMAN Prolyl 4-hydroxylase subunit alpha-2
O15498	YKT6	0.04266	0.00741	16.2482	3	YKT6_HUMAN Synaptobrevin homolog YKT6
O15511-2	ARPC5	0.12232	0.0166	5.66667	6	ARPC5_HUMAN Isoform 2 of Actin-related protein 2/3 complex subunit 5
O15541	RNF113A	0.03487	0.00638	19.878	1	R113A_HUMAN RING finger protein 113A
O15551	CLDN3	0.06335	0.00493	10.9415	1	CLD3_HUMAN Claudin-3
O43143	DHX15	0.01109	0.00484	62.502	5	DHX15_HUMAN Putative pre-mRNA-splicing factor ATP-dependent RNA helicase DHX15
O43148-2	RNMT	0.02569	0.00617	26.9812	2	MCES_HUMAN Isoform 2 of mRNA cap guanine-N7 methyltransferase
O43166	SIPA1L1	0.07473	0.00621	9.27535	4	SI1L1_HUMAN Signal-induced proliferation-associated 1-like protein 1
O43172	PRPF4	0.0221	0.00615	31.3641	8	PRP4_HUMAN U4/U6 small nuclear ribonucleoprotein Prp4
O43175	PHGDH	0.03785	0.02476	18.313	1	SERA_HUMAN D-3-phosphoglycerate dehydrogenase
O43181	NDUFS4	0.05584	0.00825	12.4131	4	NDUS4_HUMAN NADH dehydrogenase [ubiquinone] iron-sulfur protein 4, mitochondrial
O43242	PSMD3	0.02208	0.00423	31.3925	5	PSMD3_HUMAN 26S proteasome non-ATPase regulatory subunit 3
O43252	PAPSS1	0.01844	0.00761	37.5893	1	PAPS1_HUMAN Bifunctional 3'-phosphoadenosine 5'-phosphosulfate synthase 1
O43290	SART1	0.02352	0.00824	29.4705	12	SNUT1_HUMAN U4/U6.U5 tri-snRNP-associated protein 1
O43293	DAPK3	0.18593	0.03498	3.728	1	DAPK3_HUMAN Death-associated protein kinase 3
O43298	ZBTB43	0.05954	0.00803	11.6417	2	ZBT43_HUMAN Zinc finger and BTB domain-containing protein 43
O43347	MSI1	0.04885	0.00539	14.1893	3	MSI1H_HUMAN RNA-binding protein Musashi homolog 1
O43390-2	HNRNPR	0.0289	0.00507	23.9843	11	HNRPR_HUMAN Isoform 2 of Heterogeneous nuclear ribonucleoprotein R
O43395	PRPF3	0.06488	0.00448	10.6835	8	PRPF3_HUMAN U4/U6 small nuclear ribonucleoprotein Prp3
O43396	TXNL1	0.03144	0.00498	22.0467	1	TXNL1_HUMAN Thioredoxin-like protein 1
O43402	EMC8	0.04623	0.00796	14.9934	1	EMC8_HUMAN ER membrane protein complex subunit 8
O43414	ERI3	0.0616	0.00481	11.2524	1	ERI3_HUMAN ERI1 exoribonuclease 3
O43427	FIBP	0.14846	0.0129	4.66892	2	FIBP_HUMAN Acidic fibroblast growth factor intracellular-binding protein
O43432-3	EIF4G3	0.08154	0.01029	8.5007	2	IF4G3_HUMAN Isoform 3 of Eukaryotic translation initiation factor 4 gamma 3
O43447	PPIH	0.02239	0.00388	30.9579	2	PPIH_HUMAN Peptidyl-prolyl cis-trans isomerase H
O43488	AKR7A2	0.03072	0.00255	22.5634	2	ARK72_HUMAN Aflatoxin B1 aldehyde reductase member 2
O43491	EPB41L2	0.02121	0.00919	32.6802	1	E41L2_HUMAN Band 4.1-like protein 2
O43505	B3GNT1	0.07024	0.01737	9.86827	1	B3GN1_HUMAN N-acetyllactosaminide beta-1,3-N-acetylglucosaminyltransferase
O43524	FOXO3	0.12056	0.00761	5.7494	3	FOXO3_HUMAN Forkhead box protein O3
O43615	TIMM44	0.02473	0.00713	28.0286	9	TIM44_HUMAN Mitochondrial import inner membrane translocase subunit TIM44
O43617	TRAPPC3	0.11269	0.01086	6.15092	1	TPPC3_HUMAN Trafficking protein particle complex subunit 3
O43633	CHMP2A	0.10188	0.00967	6.80356	3	CHM2A_HUMAN Charged multivesicular body protein 2a
O43657	TSPAN6	0.06138	0.00712	11.2927	1	TSN6_HUMAN Tetraspanin-6
O43660	PLRG1	0.01589	0.00638	43.6216	1	PLRG1_HUMAN Pleiotropic regulator 1
O43663	PRC1	0.08886	0.00252	7.80044	9	PRC1_HUMAN Protein regulator of cytokinesis 1
O43665-3	RGS10	0.10114	0.01373	6.85334	2	RGS10_HUMAN Isoform 3 of Regulator of G-protein signaling 10
O43670-4	ZNF207	0.05582	0.003	12.4175	1	ZN207_HUMAN Isoform 4 of Zinc finger protein 207
O43674	NDUFB5	0.08073	0.00657	8.58599	4	NDUB5_HUMAN NADH dehydrogenase [ubiquinone] 1 beta subcomplex subunit 5, mitochondrial
O43683	BUB1	0.17257	0.02748	4.01661	1	BUB1_HUMAN Mitotic checkpoint serine/threonine-protein kinase BUB1
O43684	BUB3	0.0139	0.00653	49.8667	2	BUB3_HUMAN Mitotic checkpoint protein BUB3
O43707	ACTN4	very slow	0.01535	>200	8	ACTN4_HUMAN Alpha-actinin-4
O43709	WBSCR22	0.12142	0.01059	5.70867	2	WBS22_HUMAN Ribosome biogenesis methyltransferase WBSCR22
O43747-2	AP1G1	0.07656	0.00799	9.05365	4	AP1G1_HUMAN Isoform 2 of AP-1 complex subunit gamma-1
O43752	STX6	0.04235	0.00962	16.3671	1	STX6_HUMAN Syntaxin-6
O43768-4	ENSA	0.06675	0.00685	10.3842	6	ENSA_HUMAN Isoform 4 of Alpha-endosulfine
O43776	NARS	0.04248	0.0079	16.317	2	SYNC_HUMAN Asparagine--tRNA ligase, cytoplasmic
O43795	MYO1B	0.03786	0.00883	18.3082	4	MYO1B_HUMAN Unconventional myosin-Ib
O43809	NUDT21	0.04095	0.00552	16.9267	3	CPSF5_HUMAN Cleavage and polyadenylation specificity factor subunit 5
O43823	AKAP8	0.03646	0.00552	19.0112	3	AKAP8_HUMAN A-kinase anchor protein 8
O43865	AHCYL1	0.05492	0.00966	12.621	2	SAHH2_HUMAN Putative adenosylhomocysteinase 2
O43913	ORC5	0.08467	0.00628	8.18646	2	ORC5_HUMAN Origin recognition complex subunit 5
O43920	NDUFS5	0.18304	0.03659	3.78686	1	NDUS5_HUMAN NADH dehydrogenase [ubiquinone] iron-sulfur protein 5
O43933	PEX1	0.09741	0.01188	7.11577	1	PEX1_HUMAN Peroxisome biogenesis factor 1
O60231	DHX16	very slow	0.01142	>200	1	DHX16_HUMAN Putative pre-mRNA-splicing factor ATP-dependent RNA helicase DHX16
O60238	BNIP3L	0.17497	0.01002	3.96152	2	BNI3L_HUMAN BCL2/adenovirus E1B 19 kDa protein-interacting protein 3-like
O60271	SPAG9	0.05889	0.01123	11.7702	1	JIP4_HUMAN C-Jun-amino-terminal kinase-interacting protein 4
O60292	SIPA1L3	0.0321	0.006	21.5934	2	SI1L3_HUMAN Signal-induced proliferation-associated 1-like protein 3
O60293	ZFC3H1	0.07765	0.00516	8.92656	1	ZC3H1_HUMAN Zinc finger C3H1 domain-containing protein
O60313-2	OPA1	0.03394	0.00618	20.4227	10	OPA1_HUMAN Isoform 2 of Dynamin-like 120 kDa protein, mitochondrial
O60493	SNX3	0.15015	0.01083	4.61636	2	SNX3_HUMAN Sorting nexin-3
O60506	SYNCRIP	0.01547	0.00413	44.8059	9	HNRPQ_HUMAN Heterogeneous nuclear ribonucleoprotein Q
O60513	B4GALT4	0.07092	0.01307	9.77365	1	B4GT4_HUMAN Beta-1,4-galactosyltransferase 4
O60563	CCNT1	0.02225	0.00951	31.1527	4	CCNT1_HUMAN Cyclin-T1
O60573	EIF4E2	0.0863	0.00673	8.03183	2	IF4E2_HUMAN Eukaryotic translation initiation factor 4E type 2
O60645	EXOC3	0.02141	0.00488	32.3749	1	EXOC3_HUMAN Exocyst complex component 3
O60664	PLIN3	0.0289	0.00379	23.9843	6	PLIN3_HUMAN Perilipin-3
O60684	KPNA6	0.02491	0.00782	27.8261	2	IMA7_HUMAN Importin subunit alpha-7
O60701	UGDH	very slow	0.00899	>200	12	UGDH_HUMAN UDP-glucose 6-dehydrogenase
O60716	CTNND1	0.03054	0.00508	22.6964	8	CTND1_HUMAN Catenin delta-1
O60749	SNX2	0.06544	0.00931	10.5921	3	SNX2_HUMAN Sorting nexin-2
O60762	DPM1	0.04185	0.00554	16.5627	2	DPM1_HUMAN Dolichol-phosphate mannosyltransferase
O60832	DKC1	0.12577	0.00307	5.51123	3	DKC1_HUMAN H/ACA ribonucleoprotein complex subunit 4
O60841	EIF5B	0.03585	0.00734	19.3346	5	IF2P_HUMAN Eukaryotic translation initiation factor 5B
O60870	KIN	0.04817	0.00562	14.3896	4	KIN17_HUMAN DNA/RNA-binding protein KIN17
O60884	DNAJA2	0.03814	0.00461	18.1738	4	DNJA2_HUMAN DnaJ homolog subfamily A member 2
O60885	BRD4	0.08642	0.00825	8.02068	5	BRD4_HUMAN Bromodomain-containing protein 4
O60911	CTSV	0.08845	0.0068	7.8366	1	CATL2_HUMAN Cathepsin L2
O60942	RNGTT	very slow	0.01331	>200	1	MCE1_HUMAN mRNA-capping enzyme
O75112-7	LDB3	0.04851	0.0058	14.2887	1	LDB3_HUMAN Isoform 7 of LIM domain-binding protein 3
O75122	CLASP2	0.03197	0.00401	21.6812	3	CLAP2_HUMAN CLIP-associating protein 2
O75127	PTCD1	0.11344	0.00539	6.11025	2	PTCD1_HUMAN Pentatricopeptide repeat-containing protein 1, mitochondrial
O75128-2	COBL	0.04517	0.00826	15.3453	3	COBL_HUMAN Isoform 2 of Protein cordon-bleu
O75131	CPNE3	0.04069	0.00456	17.0348	6	CPNE3_HUMAN Copine-3
O75146	HIP1R	0.01056	0.01019	65.6389	6	HIP1R_HUMAN Huntingtin-interacting protein 1-related protein
O75150	RNF40	0.05211	0.00648	13.3016	5	BRE1B_HUMAN E3 ubiquitin-protein ligase BRE1B
O75152	ZC3H11A	0.03669	0.00907	18.892	14	ZC11A_HUMAN Zinc finger CCCH domain-containing protein 11A
O75153	CLUH	0.03424	0.00763	20.2438	2	CLU_HUMAN Clustered mitochondria protein homolog
O75155	CAND2	0.02949	0.005	23.5045	2	CAND2_HUMAN Cullin-associated NEDD8-dissociated protein 2
O75175	CNOT3	0.08392	0.00896	8.25962	2	CNOT3_HUMAN CCR4-NOT transcription complex subunit 3
O75179	ANKRD17	0.05614	0.00852	12.3468	2	ANR17_HUMAN Ankyrin repeat domain-containing protein 17
O75190	DNAJB6	0.15761	0.0095	4.39786	3	DNJB6_HUMAN DnaJ homolog subfamily B member 6
O75190-2	DNAJB6	0.1581	0.01139	4.38423	2	DNJB6_HUMAN Isoform B of DnaJ homolog subfamily B member 6
O75208	COQ9	0.02879	0.00639	24.076	1	COQ9_HUMAN Ubiquinone biosynthesis protein COQ9, mitochondrial
O75306	NDUFS2	0.12355	0.01709	5.61026	3	NDUS2_HUMAN NADH dehydrogenase [ubiquinone] iron-sulfur protein 2, mitochondrial
O75319	DUSP11	0.13345	0.01029	5.19406	1	DUS11_HUMAN RNA/RNP complex-1-interacting phosphatase
O75323	GBAS	0.03775	0.00227	18.3615	3	NIPS2_HUMAN Protein NipSnap homolog 2
O75330-3	HMMR	0.08386	0.00907	8.26553	7	HMMR_HUMAN Isoform 3 of Hyaluronan mediated motility receptor
O75340	PDCD6	0.01933	0.00627	35.8586	1	PDCD6_HUMAN Programmed cell death protein 6
O75348	ATP6V1G1	0.28846	0.0321	2.40292	3	VATG1_HUMAN V-type proton ATPase subunit G 1
O75351	VPS4B	0.06713	0.01027	10.3254	4	VPS4B_HUMAN Vacuolar protein sorting-associated protein 4B
O75352	MPDU1	0.03296	0.00556	21.03	2	MPU1_HUMAN Mannose-P-dolichol utilization defect 1 protein
O75362	ZNF217	0.18762	0.00721	3.69442	20	ZN217_HUMAN Zinc finger protein 217
O75368	SH3BGRL	0.09084	0.00822	7.63042	1	SH3L1_HUMAN SH3 domain-binding glutamic acid-rich-like protein
O75369-8	FLNB	0.03134	0.00372	22.117	44	FLNB_HUMAN Isoform 8 of Filamin-B
O75376	NCOR1	0.06399	0.00702	10.8321	1	NCOR1_HUMAN Nuclear receptor corepressor 1
O75390	CS	0.02076	0.00579	33.3886	9	CISY_HUMAN Citrate synthase, mitochondrial
O75391	SPAG7	0.09848	0.00917	7.03846	1	SPAG7_HUMAN Sperm-associated antigen 7
O75394	MRPL33	0.07956	0.00912	8.71226	2	RM33_HUMAN 39S ribosomal protein L33, mitochondrial
O75396	SEC22B	0.04907	0.00601	14.1257	3	SC22B_HUMAN Vesicle-trafficking protein SEC22b
O75400	PRPF40A	0.03114	0.00582	22.2591	8	PR40A_HUMAN Pre-mRNA-processing factor 40 homolog A
O75431	MTX2	0.0805	0.0068	8.61052	2	MTX2_HUMAN Metaxin-2
O75438-2	NDUFB1	0.3539	0.05562	1.9586	2	NDUB1_HUMAN Isoform 2 of NADH dehydrogenase [ubiquinone] 1 beta subcomplex subunit 1
O75439	PMPCB	0.04433	0.00999	15.6361	2	MPPB_HUMAN Mitochondrial-processing peptidase subunit beta
O75475	PSIP1	0.05774	0.00339	12.0046	10	PSIP1_HUMAN PC4 and SFRS1-interacting protein
O75489	NDUFS3	0.27094	0.04089	2.55831	1	NDUS3_HUMAN NADH dehydrogenase [ubiquinone] iron-sulfur protein 3, mitochondrial
O75521	ECI2	0.01779	0.00211	38.9627	2	ECI2_HUMAN Enoyl-CoA delta isomerase 2, mitochondrial
O75528	TADA3	0.15093	0.01113	4.59251	3	TADA3_HUMAN Transcriptional adapter 3
O75530-2	EED	0.07677	0.00652	9.02888	1	EED_HUMAN Isoform 2 of Polycomb protein EED
O75533	SF3B1	0.02483	0.00652	27.9157	15	SF3B1_HUMAN Splicing factor 3B subunit 1
O75534-3	CSDE1	0.21093	0.00972	3.28615	18	CSDE1_HUMAN Isoform 3 of Cold shock domain-containing protein E1
O75608	LYPLA1	0.03849	0.00495	18.0085	3	LYPA1_HUMAN Acyl-protein thioesterase 1
O75616	ERAL1	0.04613	0.00368	15.026	1	ERAL1_HUMAN GTPase Era, mitochondrial
O75643	SNRNP200	0.16801	0.01122	4.12563	8	U520_HUMAN U5 small nuclear ribonucleoprotein 200 kDa helicase
O75648	TRMU	0.02841	0.00328	24.398	1	MTU1_HUMAN Mitochondrial tRNA-specific 2-thiouridylase 1
O75676	RPS6KA4	0.07534	0.00427	9.20025	1	KS6A4_HUMAN Ribosomal protein S6 kinase alpha-4
O75683	SURF6	0.04614	0.00943	15.0227	5	SURF6_HUMAN Surfeit locus protein 6
O75694	NUP155	0.05939	0.00299	11.6711	5	NU155_HUMAN Nuclear pore complex protein Nup155
O75717	WDHD1	0.04142	0.01053	16.7346	1	WDHD1_HUMAN WD repeat and HMG-box DNA-binding protein 1
O75718	CRTAP	0.16593	0.02161	4.17735	2	CRTAP_HUMAN Cartilage-associated protein
O75746	SLC25A12	0.01707	0.0075	40.6062	3	CMC1_HUMAN Calcium-binding mitochondrial carrier protein Aralar1
O75787	ATP6AP2	0.25328	0.03811	2.73668	3	RENR_HUMAN Renin receptor
O75792	RNASEH2A	0.29739	0.06131	2.33077	1	RNH2A_HUMAN Ribonuclease H2 subunit A
O75794	CDC123	0.09924	0.01613	6.98455	1	CD123_HUMAN Cell division cycle protein 123 homolog
O75821	EIF3G	0.0275	0.00858	25.2054	4	EIF3G_HUMAN Eukaryotic translation initiation factor 3 subunit G
O75822	EIF3J	0.00889	0.00981	77.9693	3	EIF3J_HUMAN Eukaryotic translation initiation factor 3 subunit J
O75844	ZMPSTE24	very slow	0.01611	>200	3	FACE1_HUMAN CAAX prenyl protease 1 homolog
O75845	SC5D	0.07099	0.00518	9.76401	1	SC5D_HUMAN Lathosterol oxidase
O75874	IDH1	0.06441	0.0086	10.7615	8	IDHC_HUMAN Isocitrate dehydrogenase [NADP] cytoplasmic
O75884	RBBP9	0.05238	0.00923	13.2331	1	RBBP9_HUMAN Putative hydrolase RBBP9
O75909-4	CCNK	0.05568	0.00733	12.4488	2	CCNK_HUMAN Isoform 4 of Cyclin-K
O75914-3	PAK3	0.0238	0.00445	29.1238	3	PAK3_HUMAN Isoform 3 of Serine/threonine-protein kinase PAK 3
O75915	ARL6IP5	0.06464	0.01052	10.7232	1	PRAF3_HUMAN PRA1 family protein 3
O75925	PIAS1	0.12476	0.01006	5.55584	2	PIAS1_HUMAN E3 SUMO-protein ligase PIAS1
O75934	BCAS2	0.3419	0.0434	2.02734	4	SPF27_HUMAN Pre-mRNA-splicing factor SPF27
O75937	DNAJC8	0.01746	0.00586	39.6992	6	DNJC8_HUMAN DnaJ homolog subfamily C member 8
O75940	SMNDC1	0.05682	0.00362	12.199	4	SPF30_HUMAN Survival of motor neuron-related-splicing factor 30
O75947	ATP5H	0.05158	0.0049	13.4383	3	ATP5H_HUMAN ATP synthase subunit d, mitochondrial
O75955	FLOT1	0.13089	0.00817	5.29565	3	FLOT1_HUMAN Flotillin-1
O75964	ATP5L	0.12774	0.02075	5.42623	2	ATP5L_HUMAN ATP synthase subunit g, mitochondrial
O76003	GLRX3	0.03858	0.00403	17.9665	2	GLRX3_HUMAN Glutaredoxin-3
O76021	RSL1D1	0.01128	0.0091	61.4492	9	RL1D1_HUMAN Ribosomal L1 domain-containing protein 1
O76031	CLPX	very slow	0.00716	>200	12	CLPX_HUMAN ATP-dependent Clp protease ATP-binding subunit clpX-like, mitochondrial
O76041	NEBL	0.04324	0.00843	16.0302	1	NEBL_HUMAN Nebulette
O76041-2	NEBL	0.06672	0.01132	10.3889	3	NEBL_HUMAN Isoform 2 of Nebulette
O76062	TM7SF2	0.06945	0.00578	9.98052	1	ERG24_HUMAN Delta(14)-sterol reductase
O76080	ZFAND5	0.2352	0.0269	2.94705	1	ZFAN5_HUMAN AN1-type zinc finger protein 5
O76094	SRP72	0.03686	0.00382	18.8049	10	SRP72_HUMAN Signal recognition particle subunit SRP72
O94776	MTA2	0.05074	0.00477	13.6608	5	MTA2_HUMAN Metastasis-associated protein MTA2
O94804	STK10	0.01557	0.00629	44.5181	2	STK10_HUMAN Serine/threonine-protein kinase 10
O94826	TOMM70A	0.0113	0.0091	61.3405	18	TOM70_HUMAN Mitochondrial import receptor subunit TOM70
O94832	MYO1D	0.07817	0.0168	8.86718	1	MYO1D_HUMAN Unconventional myosin-Id
O94855-2	SEC24D	0.06474	0.00964	10.7066	2	SC24D_HUMAN Isoform 2 of Protein transport protein Sec24D
O94874	UFL1	very slow	0.00899	>200	9	UFL1_HUMAN E3 UFM1-protein ligase 1
O94888	UBXN7	0.03822	0.005	18.1357	1	UBXN7_HUMAN UBX domain-containing protein 7
O94903	PROSC	0.04374	0.00876	15.847	1	PROSC_HUMAN Proline synthase co-transcribed bacterial homolog protein
O94906	PRPF6	0.11167	0.00747	6.2071	12	PRP6_HUMAN Pre-mRNA-processing factor 6
O94913	PCF11	0.04859	0.00611	14.2652	9	PCF11_HUMAN Pre-mRNA cleavage complex 2 protein Pcf11
O94925	GLS	0.03466	0.00682	19.9985	6	GLSK_HUMAN Glutaminase kidney isoform, mitochondrial
O94952	FBXO21	0.08935	0.00428	7.75766	3	FBX21_HUMAN F-box only protein 21
O94972	TRIM37	0.50795	0.10656	1.3646	1	TRI37_HUMAN E3 ubiquitin-protein ligase TRIM37
O94979-8	SEC31A	0.01523	0.0076	45.512	11	SC31A_HUMAN Isoform 8 of Protein transport protein Sec31A
O95067	CCNB2	0.13828	0.01344	5.01264	2	CCNB2_HUMAN G2/mitotic-specific cyclin-B2
O95071	UBR5	0.0619	0.00489	11.1979	3	UBR5_HUMAN E3 ubiquitin-protein ligase UBR5
O95084	PRSS23	6.47521	6654.69	0.107046	4	PRS23_HUMAN Serine protease 23
O95139	NDUFB6	0.0939	0.01103	7.38176	3	NDUB6_HUMAN NADH dehydrogenase [ubiquinone] 1 beta subcomplex subunit 6
O95140	MFN2	0.05383	0.0054	12.8766	2	MFN2_HUMAN Mitofusin-2
O95163	IKBKAP	0.05014	0.00778	13.8242	1	ELP1_HUMAN Elongator complex protein 1
O95166	GABARAP	0.11165	0.01058	6.20821	2	GBRAP_HUMAN Gamma-aminobutyric acid receptor-associated protein
O95182	NDUFA7	0.05949	0.00542	11.6515	5	NDUA7_HUMAN NADH dehydrogenase [ubiquinone] 1 alpha subcomplex subunit 7
O95197	RTN3	0.01132	0.00517	61.2321	3	RTN3_HUMAN Reticulon-3
O95197-5	RTN3	0.02546	0.00977	27.2249	1	RTN3_HUMAN Isoform 5 of Reticulon-3
O95202	LETM1	0.01407	0.00742	49.2642	13	LETM1_HUMAN LETM1 and EF-hand domain-containing protein 1, mitochondrial
O95208	EPN2	0.0169	0.00938	41.0146	2	EPN2_HUMAN Epsin-2
O95218	ZRANB2	0.00759	0.01362	91.3237	1	ZRAB2_HUMAN Zinc finger Ran-binding domain-containing protein 2
O95219	SNX4	0.07544	0.00774	9.18806	1	SNX4_HUMAN Sorting nexin-4
O95232	LUC7L3	0.03381	0.00701	20.5012	4	LC7L3_HUMAN Luc7-like protein 3
O95235	KIF20A	0.1266	0.0032	5.4751	4	KI20A_HUMAN Kinesin-like protein KIF20A
O95239	KIF4A	0.03289	0.00896	21.0747	2	KIF4A_HUMAN Chromosome-associated kinesin KIF4A
O95243	MBD4	0.12179	0.00752	5.69133	4	MBD4_HUMAN Methyl-CpG-binding domain protein 4
O95249	GOSR1	0.04988	0.00884	13.8963	2	GOSR1_HUMAN Golgi SNAP receptor complex member 1
O95292	VAPB	0.0078	0.00695	88.865	9	VAPB_HUMAN Vesicle-associated membrane protein-associated protein B/C
O95298	NDUFC2	0.17774	0.01924	3.89978	2	NDUC2_HUMAN NADH dehydrogenase [ubiquinone] 1 subunit C2
O95299	NDUFA10	0.0605	0.00606	11.457	5	NDUAA_HUMAN NADH dehydrogenase [ubiquinone] 1 alpha subcomplex subunit 10, mitochondrial
O95302	FKBP9	0.03463	0.00961	20.0158	1	FKBP9_HUMAN Peptidyl-prolyl cis-trans isomerase FKBP9
O95319-3	CELF2	0.03196	0.00304	21.688	4	CELF2_HUMAN Isoform 3 of CUGBP Elav-like family member 2
O95340-2	PAPSS2	0.00518	0.01079	133.812	5	PAPS2_HUMAN Isoform B of Bifunctional 3'-phosphoadenosine 5'-phosphosulfate synthase 2
O95347	SMC2	0.0794	0.00552	8.72981	3	SMC2_HUMAN Structural maintenance of chromosomes protein 2
O95363	FARS2	0.03049	0.00458	22.7336	1	SYFM_HUMAN Phenylalanine--tRNA ligase, mitochondrial
O95365	ZBTB7A	0.04317	0.00665	16.0562	2	ZBT7A_HUMAN Zinc finger and BTB domain-containing protein 7A
O95373	IPO7	very slow	0.00728	>200	1	IPO7_HUMAN Importin-7
O95376	ARIH2	0.03355	0.01229	20.6601	1	ARI2_HUMAN E3 ubiquitin-protein ligase ARIH2
O95391	SLU7	0.07334	0.00988	9.45115	4	SLU7_HUMAN Pre-mRNA-splicing factor SLU7
O95394-4	PGM3	0.03174	0.00783	21.8383	3	AGM1_HUMAN Isoform 3 of Phosphoacetylglucosamine mutase
O95402	MED26	0.1327	0.01315	5.22342	2	MED26_HUMAN Mediator of RNA polymerase II transcription subunit 26
O95425	SVIL	0.01234	0.0082	56.1708	8	SVIL_HUMAN Supervillin
O95433	AHSA1	0.07435	0.01357	9.32276	7	AHSA1_HUMAN Activator of 90 kDa heat shock protein ATPase homolog 1
O95453	PARN	0.06725	0.00838	10.307	1	PARN_HUMAN Poly(A)-specific ribonuclease PARN
O95470	SGPL1	0.02826	0.00573	24.5275	4	SGPL1_HUMAN Sphingosine-1-phosphate lyase 1
O95471	CLDN7	0.0707	0.01254	9.80406	3	CLD7_HUMAN Claudin-7
O95573	ACSL3	0.04461	0.00414	15.5379	8	ACSL3_HUMAN Long-chain-fatty-acid--CoA ligase 3
O95628-6	CNOT4	0.06489	0.00741	10.6819	2	CNOT4_HUMAN Isoform 6 of CCR4-NOT transcription complex subunit 4
O95671	ASMTL	0.09898	0.01967	7.0029	2	ASML_HUMAN N-acetylserotonin O-methyltransferase-like protein
O95716	RAB3D	very slow	0.0169	>200	3	RAB3D_HUMAN Ras-related protein Rab-3D
O95747	OXSR1	0.00998	0.00476	69.4536	2	OXSR1_HUMAN Serine/threonine-protein kinase OSR1
O95758-4	PTBP3	0.02439	0.0074	28.4193	5	PTBP3_HUMAN Isoform 4 of Polypyrimidine tract-binding protein 3
O95782	AP2A1	0.02273	0.00853	30.4948	5	AP2A1_HUMAN AP-2 complex subunit alpha-1
O95785	WIZ	0.03434	0.00666	20.1848	2	WIZ_HUMAN Protein Wiz
O95793	STAU1	0.09137	0.01128	7.58616	5	STAU1_HUMAN Double-stranded RNA-binding protein Staufen homolog 1
O95801	TTC4	0.06841	0.00899	10.1322	2	TTC4_HUMAN Tetratricopeptide repeat protein 4
O95817	BAG3	0.06932	0.00682	9.99924	4	BAG3_HUMAN BAG family molecular chaperone regulator 3
O95831	AIFM1	0.0169	0.00681	41.0146	10	AIFM1_HUMAN Apoptosis-inducing factor 1, mitochondrial
O95858	TSPAN15	0.10205	0.00521	6.79223	1	TSN15_HUMAN Tetraspanin-15
O95926	SYF2	0.18411	0.01017	3.76485	2	SYF2_HUMAN Pre-mRNA-splicing factor SYF2
O95983	MBD3	0.03268	0.00535	21.2101	1	MBD3_HUMAN Methyl-CpG-binding domain protein 3
O95994	AGR2	0.06164	0.00752	11.2451	1	AGR2_HUMAN Anterior gradient protein 2 homolog
O96000	NDUFB10	0.17801	0.0142	3.89387	3	NDUBA_HUMAN NADH dehydrogenase [ubiquinone] 1 beta subcomplex subunit 10
O96005	CLPTM1	0.02558	0.00668	27.0972	2	CLPT1_HUMAN Cleft lip and palate transmembrane protein 1
P00167	CYB5A	0.03291	0.00356	21.0619	3	CYB5_HUMAN Cytochrome b5
P00338-3	LDHA	0.06428	0.00906	10.7832	11	LDHA_HUMAN Isoform 3 of L-lactate dehydrogenase A chain
P00367	GLUD1	0.09628	0.01291	7.19929	8	DHE3_HUMAN Glutamate dehydrogenase 1, mitochondrial
P00374	DHFR	0.0733	0.00889	9.45631	1	DYR_HUMAN Dihydrofolate reductase
P00387-3	CYB5R3	0.01687	0.00517	41.0876	4	NB5R3_HUMAN Isoform 3 of NADH-cytochrome b5 reductase 3
P00390	GSR	0.09108	0.01602	7.61031	1	GSHR_HUMAN Glutathione reductase, mitochondrial
P00492	HPRT1	0.05292	0.01082	13.098	1	HPRT_HUMAN Hypoxanthine-guanine phosphoribosyltransferase
P00505	GOT2	very slow	0.02221	>200	7	AATM_HUMAN Aspartate aminotransferase, mitochondrial
P00558	PGK1	0.01229	0.00404	56.3993	18	PGK1_HUMAN Phosphoglycerate kinase 1
P00568	AK1	0.08674	0.0125	7.99109	3	KAD1_HUMAN Adenylate kinase isoenzyme 1
P00846	MT-ATP6	0.03773	0.00667	18.3712	1	ATP6_HUMAN ATP synthase subunit a
P00918	CA2	0.03216	0.00515	21.5531	1	CAH2_HUMAN Carbonic anhydrase 2
P00966	ASS1	0.05357	0.01152	12.9391	14	ASSY_HUMAN Argininosuccinate synthase
P01111	NRAS	very slow	0.00955	>200	4	RASN_HUMAN GTPase NRas
P01116	KRAS	0.01265	0.00482	54.7942	2	RASK_HUMAN GTPase KRas
P02545	LMNA	0.01857	0.00657	37.3262	11	LMNA_HUMAN Prelamin-A/C
P02647	APOA1	0.04693	0.00602	14.7698	1	APOA1_HUMAN Apolipoprotein A-I
P02786	TFRC	0.03278	0.00228	21.1454	3	TFR1_HUMAN Transferrin receptor protein 1
P02794	FTH1	0.22564	0.06837	3.07192	1	FRIH_HUMAN Ferritin heavy chain
P04040	CAT	0.04891	0.00931	14.1719	2	CATA_HUMAN Catalase
P04062	GBA	0.14502	0.01014	4.77967	3	GLCM_HUMAN Glucosylceramidase
P04075-2	ALDOA	very slow	0.02681	>200	11	ALDOA_HUMAN Isoform 2 of Fructose-bisphosphate aldolase A
P04080	CSTB	0.05403	0.00874	12.8289	3	CYTB_HUMAN Cystatin-B
P04156	PRNP	0.23232	0.03001	2.98359	1	PRIO_HUMAN Major prion protein
P04181	OAT	0.05273	0.00364	13.1452	10	OAT_HUMAN Ornithine aminotransferase, mitochondrial
P04183	TK1	0.08255	0.0049	8.3967	4	KITH_HUMAN Thymidine kinase, cytosolic
P04406	GAPDH	0.05358	0.01059	12.9367	14	G3P_HUMAN Glyceraldehyde-3-phosphate dehydrogenase
P04632	CAPNS1	0.3113	0.06708	2.22662	3	CPNS1_HUMAN Calpain small subunit 1
P04792	HSPB1	0.07294	0.00715	9.50298	4	HSPB1_HUMAN Heat shock protein beta-1
P04798	CYP1A1	0.24234	0.03527	2.86023	3	CP1A1_HUMAN Cytochrome P450 1A1
P04843	RPN1	0.04991	0.007	13.8879	14	RPN1_HUMAN Dolichyl-diphosphooligosaccharide--protein glycosyltransferase subunit 1
P04844	RPN2	0.1076	0.00977	6.44189	6	RPN2_HUMAN Dolichyl-diphosphooligosaccharide--protein glycosyltransferase subunit 2
P04899-4	GNAI2	0.02654	0.0085	26.1171	8	GNAI2_HUMAN Isoform sGi2 of Guanine nucleotide-binding protein G(i) subunit alpha-2
P04908	HIST1H2AB	0.06173	0.01101	11.2287	1	H2A1B_HUMAN Histone H2A type 1-B/E
P05023	ATP1A1	0.06936	0.00831	9.99347	3	AT1A1_HUMAN Sodium/potassium-transporting ATPase subunit alpha-1
P05026	ATP1B1	0.06323	0.00788	10.9623	6	AT1B1_HUMAN Sodium/potassium-transporting ATPase subunit beta-1
P05114	HMGN1	very slow	0.01031	>200	4	HMGN1_HUMAN Non-histone chromosomal protein HMG-14
P05141	SLC25A5	0.02331	0.00984	29.736	4	ADT2_HUMAN ADP/ATP translocase 2
P05161	ISG15	0.08571	0.01068	8.08712	1	ISG15_HUMAN Ubiquitin-like protein ISG15
P05166-2	PCCB	0.19015	0.03132	3.64527	1	PCCB_HUMAN Isoform 2 of Propionyl-CoA carboxylase beta chain, mitochondrial
P05198	EIF2S1	0.05004	0.00931	13.8519	4	IF2A_HUMAN Eukaryotic translation initiation factor 2 subunit 1
P05204	HMGN2	very slow	0.01594	>200	1	HMGN2_HUMAN Non-histone chromosomal protein HMG-17
P05362	ICAM1	0.02333	0.00517	29.7106	1	ICAM1_HUMAN Intercellular adhesion molecule 1
P05387	RPLP2	0.06574	0.00647	10.5438	3	RLA2_HUMAN 60S acidic ribosomal protein P2
P05388	RPLP0	0.04158	0.00408	16.6702	3	RLA0_HUMAN 60S acidic ribosomal protein P0
P05412	JUN	0.23525	0.0355	2.94643	1	JUN_HUMAN Transcription factor AP-1
P05455	SSB	0.00947	0.01078	73.194	9	LA_HUMAN Lupus La protein
P05556	ITGB1	0.10034	0.00882	6.90798	1	ITB1_HUMAN Integrin beta-1
P05556-3	ITGB1	0.04987	0.00952	13.8991	3	ITB1_HUMAN Isoform 3 of Integrin beta-1
P06280	GLA	0.18938	0.00706	3.66009	2	AGAL_HUMAN Alpha-galactosidase A
P06396	GSN	0.02495	0.01069	27.7815	7	GELS_HUMAN Gelsolin
P06400	RB1	0.02797	0.0085	24.7818	2	RB_HUMAN Retinoblastoma-associated protein
P06401	PGR	0.04671	0.0092	14.8394	1	PRGR_HUMAN Progesterone receptor
P06493	CDK1	0.08521	0.01105	8.13458	2	CDK1_HUMAN Cyclin-dependent kinase 1
P06576	ATP5B	0.11193	0.01207	6.19268	4	ATPB_HUMAN ATP synthase subunit beta, mitochondrial
P06730-2	EIF4E	0.02651	0.00618	26.1466	2	IF4E_HUMAN Isoform 2 of Eukaryotic translation initiation factor 4E
P06733	ENO1	0.04396	0.00966	15.7677	16	ENOA_HUMAN Alpha-enolase
P06737	PYGL	0.04966	0.00837	13.9579	1	PYGL_HUMAN Glycogen phosphorylase, liver form
P06744-2	GPI	0.15134	0.02683	4.58007	7	G6PI_HUMAN Isoform 2 of Glucose-6-phosphate isomerase
P06748	NPM1	0.00881	0.00738	78.6773	11	NPM_HUMAN Nucleophosmin
P06753	TPM3	0.05058	0.015	13.704	4	TPM3_HUMAN Tropomyosin alpha-3 chain
P07108-5	DBI	0.06407	0.01044	10.8186	1	ACBP_HUMAN Isoform 5 of Acyl-CoA-binding protein
P07237	P4HB	0.03357	0.01119	20.6478	1	PDIA1_HUMAN Protein disulfide-isomerase
P07305	H1F0	0.03379	0.00734	20.5134	5	H10_HUMAN Histone H1.0
P07384	CAPN1	0.06992	0.00809	9.91343	3	CAN1_HUMAN Calpain-1 catalytic subunit
P07602-3	PSAP	very slow	0.0115	>200	3	SAP_HUMAN Isoform Sap-mu-9 of Prosaposin
P07686	HEXB	0.01817	0.00217	38.1479	2	HEXB_HUMAN Beta-hexosaminidase subunit beta
P07737	PFN1	0.0701	0.01114	9.88798	6	PROF1_HUMAN Profilin-1
P07814	EPRS	0.02243	0.01157	30.9027	6	SYEP_HUMAN Bifunctional glutamate/proline--tRNA ligase
P07858	CTSB	0.01188	0.00957	58.3457	2	CATB_HUMAN Cathepsin B
P07900-2	HSP90AA1	0.00874	0.00635	79.3075	21	HS90A_HUMAN Isoform 2 of Heat shock protein HSP 90-alpha
P07910	HNRNPC	0.06946	0.01052	9.97908	3	HNRPC_HUMAN Heterogeneous nuclear ribonucleoproteins C1/C2
P07948	LYN	0.01599	0.00526	43.3488	1	LYN_HUMAN Tyrosine-protein kinase Lyn
P07949	RET	0.32288	0.01568	2.14676	1	RET_HUMAN Proto-oncogene tyrosine-protein kinase receptor Ret
P07954	FH	0.13449	0.01119	5.15389	4	FUMH_HUMAN Fumarate hydratase, mitochondrial
P08107	HSPA1A	very slow	0.01036	>200	14	HSP71_HUMAN Heat shock 70 kDa protein 1A/1B
P08134	RHOC	0.06249	0.00829	11.0921	2	RHOC_HUMAN Rho-related GTP-binding protein RhoC
P08195-4	SLC3A2	0.02398	0.01615	28.9052	2	4F2_HUMAN Isoform 4 of 4F2 cell-surface antigen heavy chain
P08237-3	PFKM	0.06216	0.00745	11.151	1	K6PF_HUMAN Isoform 3 of 6-phosphofructokinase, muscle type
P08238	HSP90AB1	0.02318	0.00511	29.9028	8	HS90B_HUMAN Heat shock protein HSP 90-beta
P08240	SRPR	0.01725	0.00796	40.1824	8	SRPR_HUMAN Signal recognition particle receptor subunit alpha
P08243	ASNS	0.06393	0.02375	10.8423	8	ASNS_HUMAN Asparagine synthetase [glutamine-hydrolyzing]
P08397	HMBS	0.11364	0.00592	6.0995	3	HEM3_HUMAN Porphobilinogen deaminase
P08559-4	PDHA1	0.13146	0.01381	5.27269	3	ODPA_HUMAN Isoform 4 of Pyruvate dehydrogenase E1 component subunit alpha, somatic form, mitochondrial
P08579	SNRPB2	0.12306	0.01017	5.6326	3	RU2B_HUMAN U2 small nuclear ribonucleoprotein B''
P08621	SNRNP70	0.03224	0.0039	21.4996	3	RU17_HUMAN U1 small nuclear ribonucleoprotein 70 kDa
P08754	GNAI3	0.05187	0.00677	13.3632	2	GNAI3_HUMAN Guanine nucleotide-binding protein G(k) subunit alpha
P08758	ANXA5	0.05306	0.00789	13.0635	6	ANXA5_HUMAN Annexin A5
P08865	RPSA	0.05478	0.00827	12.6533	5	RSSA_HUMAN 40S ribosomal protein SA
P08922	ROS1	0.06589	0.00925	10.5198	1	ROS1_HUMAN Proto-oncogene tyrosine-protein kinase ROS
P08962	CD63	0.03966	0.0078	17.4772	3	CD63_HUMAN CD63 antigen
P09001	MRPL3	0.1832	0.02779	3.78355	1	RM03_HUMAN 39S ribosomal protein L3, mitochondrial
P09012	SNRPA	0.08575	0.01292	8.08335	5	SNRPA_HUMAN U1 small nuclear ribonucleoprotein A
P09110	ACAA1	0.00231	0.00713	>200	2	THIK_HUMAN 3-ketoacyl-CoA thiolase, peroxisomal
P09132	SRP19	0.05075	0.00699	13.6581	3	SRP19_HUMAN Signal recognition particle 19 kDa protein
P09234	SNRPC	0.02908	0.00428	23.8359	1	RU1C_HUMAN U1 small nuclear ribonucleoprotein C
P09382	LGALS1	0.04587	0.00702	15.1111	2	LEG1_HUMAN Galectin-1
P09429	HMGB1	0.07217	0.00986	9.60437	9	HMGB1_HUMAN High mobility group protein B1
P09467	FBP1	0.0377	0.01066	18.3859	5	F16P1_HUMAN Fructose-1,6-bisphosphatase 1
P09493-8	TPM1	0.03627	0.01635	19.1108	1	TPM1_HUMAN Isoform 8 of Tropomyosin alpha-1 chain
P09493-9	TPM1	0.03594	0.01168	19.2862	6	TPM1_HUMAN Isoform 9 of Tropomyosin alpha-1 chain
P09525	ANXA4	0.04344	0.00834	15.9564	5	ANXA4_HUMAN Annexin A4
P09543	CNP	0.02113	0.00552	32.8039	7	CN37_HUMAN 2',3'-cyclic-nucleotide 3'-phosphodiesterase
P09601	HMOX1	0.06174	0.00657	11.2269	2	HMOX1_HUMAN Heme oxygenase 1
P09622	DLD	0.06677	0.00893	10.3811	12	DLDH_HUMAN Dihydrolipoyl dehydrogenase, mitochondrial
P09651	HNRNPA1	0.0282	0.00963	24.5797	3	ROA1_HUMAN Heterogeneous nuclear ribonucleoprotein A1
P09661	SNRPA1	0.07281	0.00592	9.51994	8	RU2A_HUMAN U2 small nuclear ribonucleoprotein A'
P09669	COX6C	0.61726	0.08989	1.12294	4	COX6C_HUMAN Cytochrome c oxidase subunit 6C
P09874	PARP1	0.01415	0.00712	48.9857	15	PARP1_HUMAN Poly [ADP-ribose] polymerase 1
P09914	IFIT1	0.1033	0.01492	6.71004	2	IFIT1_HUMAN Interferon-induced protein with tetratricopeptide repeats 1
P09960	LTA4H	0.05604	0.00885	12.3688	1	LKHA4_HUMAN Leukotriene A-4 hydrolase
P0C221	CCDC175	very slow	0.00422	>200	1	CC175_HUMAN Coiled-coil domain-containing protein 175
P0C7P4	UQCRFS1P1	0.03787	0.00759	18.3033	2	UCRIL_HUMAN Putative cytochrome b-c1 complex subunit Rieske-like protein 1
P0C7X2	ZNF688	0.03969	0.00974	17.464	1	ZN688_HUMAN Zinc finger protein 688
P0CG08	GPR89B	0.04294	0.00605	16.1422	2	GPHRB_HUMAN Golgi pH regulator B
P0CG48	UBC	0.02824	0.01352	24.5449	3	UBC_HUMAN Polyubiquitin-C
P0CW22	RPS17L	0.17661	0.03715	3.92473	2	RS17L_HUMAN 40S ribosomal protein S17-like
P0DJ07	PET100	0.13019	0.01012	5.32412	1	PT100_HUMAN Protein PET100 homolog, mitochondrial
P10155	TROVE2	0.13786	0.01455	5.02791	3	RO60_HUMAN 60 kDa SS-A/Ro ribonucleoprotein
P10276	RARA	0.11003	0.00747	6.29962	3	RARA_HUMAN Retinoic acid receptor alpha
P10301	RRAS	very slow	0.01646	>200	2	RRAS_HUMAN Ras-related protein R-Ras
P10316	HLA-A	0.08475	0.00747	8.17873	2	1A69_HUMAN HLA class I histocompatibility antigen, A-69 alpha chain
P10599	TXN	0.04998	0.01077	13.8685	2	THIO_HUMAN Thioredoxin
P10606	COX5B	0.16542	0.01283	4.19023	2	COX5B_HUMAN Cytochrome c oxidase subunit 5B, mitochondrial
P10619	CTSA	0.0913	0.01259	7.59197	3	PPGB_HUMAN Lysosomal protective protein
P10620	MGST1	0.06193	0.01229	11.1924	1	MGST1_HUMAN Microsomal glutathione S-transferase 1
P10632	CYP2C8	0.06265	0.01843	11.0638	1	CP2C8_HUMAN Cytochrome P450 2C8
P10644	PRKAR1A	0.11678	0.01172	5.9355	4	KAP0_HUMAN cAMP-dependent protein kinase type I-alpha regulatory subunit
P10768	ESD	0.05837	0.00871	11.8751	4	ESTD_HUMAN S-formylglutathione hydrolase
P10809	HSPD1	0.01856	0.00636	37.3463	18	CH60_HUMAN 60 kDa heat shock protein, mitochondrial
P10909-2	CLU	0.14803	0.01118	4.68248	5	CLUS_HUMAN Isoform 2 of Clusterin
P11021	HSPA5	0.02618	0.01592	26.4762	17	GRP78_HUMAN 78 kDa glucose-regulated protein
P11142	HSPA8	0.03724	0.0175	18.613	21	HSP7C_HUMAN Heat shock cognate 71 kDa protein
P11166	SLC2A1	0.01708	0.01152	40.5824	1	GTR1_HUMAN Solute carrier family 2, facilitated glucose transporter member 1
P11172	UMPS	0.0296	0.00467	23.4171	1	UMPS_HUMAN Uridine 5'-monophosphate synthase
P11177	PDHB	0.11463	0.00542	6.04682	2	ODPB_HUMAN Pyruvate dehydrogenase E1 component subunit beta, mitochondrial
P11233	RALA	0.01103	0.00697	62.842	5	RALA_HUMAN Ras-related protein Ral-A
P11234	RALB	0.00198	0.00892	>200	5	RALB_HUMAN Ras-related protein Ral-B
P11310-2	ACADM	0.10083	0.00946	6.87441	3	ACADM_HUMAN Isoform 2 of Medium-chain specific acyl-CoA dehydrogenase, mitochondrial
P11387	TOP1	0.01241	0.01011	55.8539	11	TOP1_HUMAN DNA topoisomerase 1
P11413-2	G6PD	0.05398	0.01055	12.8408	5	G6PD_HUMAN Isoform Long of Glucose-6-phosphate 1-dehydrogenase
P11586	MTHFD1	0.06479	0.00791	10.6984	14	C1TC_HUMAN C-1-tetrahydrofolate synthase, cytoplasmic
P11908-2	PRPS2	0.05305	0.00823	13.0659	2	PRPS2_HUMAN Isoform 2 of Ribose-phosphate pyrophosphokinase 2
P11940	PABPC1	0.02873	0.00953	24.1263	13	PABP1_HUMAN Polyadenylate-binding protein 1
P12004	PCNA	0.00479	0.0068	144.707	2	PCNA_HUMAN Proliferating cell nuclear antigen
P12081	HARS	0.03187	0.0053	21.7492	3	SYHC_HUMAN Histidine--tRNA ligase, cytoplasmic
P12236	SLC25A6	0.07541	0.0101	9.19171	8	ADT3_HUMAN ADP/ATP translocase 3
P12268	IMPDH2	0.02176	0.00404	31.8542	6	IMDH2_HUMAN Inosine-5'-monophosphate dehydrogenase 2
P12270	TPR	0.12398	0.01361	5.5908	2	TPR_HUMAN Nucleoprotein TPR
P12429	ANXA3	0.03252	0.01484	21.3145	1	ANXA3_HUMAN Annexin A3
P12532-2	CKMT1A	0.05386	0.00987	12.8694	1	KCRU_HUMAN Isoform 2 of Creatine kinase U-type, mitochondrial
P12814-4	ACTN1	0.0185	0.00773	37.4674	7	ACTN1_HUMAN Isoform 4 of Alpha-actinin-1
P12956	XRCC6	0.04436	0.0051	15.6255	13	XRCC6_HUMAN X-ray repair cross-complementing protein 6
P13010	XRCC5	0.0711	0.01072	9.74891	8	XRCC5_HUMAN X-ray repair cross-complementing protein 5
P13051	UNG	0.13425	0.00876	5.16311	4	UNG_HUMAN Uracil-DNA glycosylase
P13073	COX4I1	0.09736	0.00586	7.11942	8	COX41_HUMAN Cytochrome c oxidase subunit 4 isoform 1, mitochondrial
P13196	ALAS1	0.18432	0.01942	3.76056	1	HEM1_HUMAN 5-aminolevulinate synthase, nonspecific, mitochondrial
P13284	IFI30	0.07706	0.01447	8.9949	1	GILT_HUMAN Gamma-interferon-inducible lysosomal thiol reductase
P13498	CYBA	0.18538	0.01236	3.73906	2	CY24A_HUMAN Cytochrome b-245 light chain
P13639	EEF2	0.12893	0.01506	5.37615	18	EF2_HUMAN Elongation factor 2
P13667	PDIA4	0.00354	0.01325	195.804	14	PDIA4_HUMAN Protein disulfide-isomerase A4
P13674	P4HA1	0.02652	0.0043	26.1368	4	P4HA1_HUMAN Prolyl 4-hydroxylase subunit alpha-1
P13693	TPT1	0.15176	0.0143	4.56739	2	TCTP_HUMAN Translationally-controlled tumor protein
P13796	LCP1	0.03366	0.01209	20.5926	1	PLSL_HUMAN Plastin-2
[truncated: 2,378 more rows]
