# Supplementary material for: Systematic quantification of the dynamics of newly synthesized proteins unveiling their degradation pathways in human cells
Source: Chem Sci. 2020 Mar 10;11(13):3557–68. doi: 10.1039/c9sc06479f (PMC8152571; doi:10.1039/c9sc06479f)
Supplement: SC-011-C9SC06479F-s003 [file SC-011-C9SC06479F-s003.xlsx]

## Sheet: Sheet1
Table S2 - The half-lives of proteins in different cellular compartments
Uniprot ID	Gene Symbol	Half-life (h)	Extracellular exosome	Golgi apparatus	Plasma membrane	Mitochondrion	Cytosol	Cytoskeleton	Lysosome	Nucleus	Proteasome	Ribosome	Annotation
A0AV96	RBM47	7.98925								ü			RBM47_HUMAN RNA-binding protein 47
A0FGR8-6	ESYT2	17.5391			ü								ESYT2_HUMAN Isoform 6 of Extended synaptotagmin-2
A1L0T0	ILVBL	10.4673											ILVBL_HUMAN Acetolactate synthase-like protein
A2A3N6	PIPSL	5.89963											PIPSL_HUMAN Putative PIP5K1A and PSMD4-like protein
A2RRP1	NBAS	11.9241					ü						NBAS_HUMAN Neuroblastoma-amplified sequence
A3KMH1	VWA8	9.75165				ü							VWA8_HUMAN von Willebrand factor A domain-containing protein 8
A3KN83	SBNO1	10.555											SBNO1_HUMAN Protein strawberry notch homolog 1
A4D1E9	GTPBP10	7.32017				ü				ü			GTPBA_HUMAN GTP-binding protein 10
A5YKK6	CNOT1	10.7116					ü			ü			CNOT1_HUMAN CCR4-NOT transcription complex subunit 1
A6NCI4	VWA3A	11.1063											VWA3A_HUMAN von Willebrand factor A domain-containing protein 3A
A6NDG6	PGP	21.6473					ü						PGP_HUMAN Phosphoglycolate phosphatase
A6NIZ1		26.3855			ü		ü						RP1BL_HUMAN Ras-related protein Rap-1b-like protein
A6NKD9	CCDC85C	5.62163											CC85C_HUMAN Coiled-coil domain-containing protein 85C
A6NKH3	RPL37L	7.64894										ü	RL37L_HUMAN Putative 60S ribosomal protein L37a-like
A8MTT3	CEBPZOS	10.1397				ü							A8MTT3_HUMAN Protein CEBPZOS
A9UHW6	MIF4GD	5.67735								ü			MI4GD_HUMAN MIF4G domain-containing protein
A9UHW6-3	MIF4GD	10.8695								ü			MI4GD_HUMAN Isoform 3 of MIF4G domain-containing protein
B4DTU4	LIG1	8.8344		ü		ü				ü			B4DTU4_HUMAN DNA ligase
B5ME19	EIF3CL	1.84475											EIFCL_HUMAN Eukaryotic translation initiation factor 3 subunit C-like protein
C9J2U4	TAMM41	14.8426				ü							C9J2U4_HUMAN Chromosome 3 open reading frame 31, isoform CRA_f
E7EQ69	NAA50	8.02625	ü										E7EQ69_HUMAN N-alpha-acetyltransferase 50
E9PN48	ARFGAP2	10.2887		ü			ü						E9PN48_HUMAN ADP-ribosylation factor GTPase-activating protein 2 (Fragment)
E9PRG8	C11orf48	8.3906											E9PRG8_HUMAN Uncharacterized protein C11orf48
G3V4T6	GSTZ1	12.4532				ü	ü						G3V4T6_HUMAN Maleylacetoacetate isomerase
H0YAR2	PABPC1	9.83187	ü				ü			ü			H0YAR2_HUMAN Polyadenylate-binding protein 1 (Fragment)
H0YBE0	MTDH	14.8045								ü			H0YBE0_HUMAN Protein LYRIC (Fragment)
H0YIV9		5.63855											H0YIV9_HUMAN Uncharacterized protein (Fragment)
H0YJ12	PPP2R5C	10.1799					ü			ü			H0YJ12_HUMAN Serine/threonine-protein phosphatase 2A 56 kDa regulatory subunit gamma isoform (Fragment)
H7C1R8	SLC22A5	10.7332	ü										H7C1R8_HUMAN Solute carrier family 22 member 5 (Fragment)
J3KP28	SYTL2	11.1672											J3KP28_HUMAN Synaptotagmin-like protein 2
O00151	PDLIM1	14.7635						ü					PDLI1_HUMAN PDZ and LIM domain protein 1
O00159	MYO1C	8.69586	ü		ü		ü	ü		ü			MYO1C_HUMAN Unconventional myosin-Ic
O00170	AIP	11.0374					ü			ü			AIP_HUMAN AH receptor-interacting protein
O00178	GTPBP1	20.068					ü						GTPB1_HUMAN GTP-binding protein 1
O00186	STXBP3	9.87952	ü		ü		ü						STXB3_HUMAN Syntaxin-binding protein 3
O00193	SMAP	14.1806											SMAP_HUMAN Small acidic protein
O00194	RAB27B	20.9031	ü	ü	ü								RB27B_HUMAN Ras-related protein Rab-27B
O00203	AP3B1	13.34		ü					ü				AP3B1_HUMAN AP-3 complex subunit beta-1
O00204	SULT2B1	11.9261	ü				ü			ü			ST2B1_HUMAN Sulfotransferase family cytosolic 2B member 1
O00214-2	LGALS8	6.1038	ü				ü						LEG8_HUMAN Isoform 2 of Galectin-8
O00231-2	PSMD11	9.66867	ü				ü			ü	ü		PSD11_HUMAN Isoform 2 of 26S proteasome non-ATPase regulatory subunit 11
O00232	PSMD12	3.25391	ü				ü			ü	ü		PSD12_HUMAN 26S proteasome non-ATPase regulatory subunit 12
O00233	PSMD9	9.40116					ü			ü	ü		PSMD9_HUMAN 26S proteasome non-ATPase regulatory subunit 9
O00257	CBX4	4.46414								ü			CBX4_HUMAN E3 SUMO-protein ligase CBX4
O00267	SUPT5H	10.7782								ü			SPT5H_HUMAN Transcription elongation factor SPT5
O00299	CLIC1	10.2826	ü		ü	ü				ü			CLIC1_HUMAN Chloride intracellular channel protein 1
O00400	SLC33A1	10.4437		ü	ü								ACATN_HUMAN Acetyl-coenzyme A transporter 1
O00410-3	IPO5	13.3374		ü						ü			IPO5_HUMAN Isoform 3 of Importin-5
O00422	SAP18	5.37115								ü			SAP18_HUMAN Histone deacetylase complex subunit SAP18
O00429-6	DNM1L	19.0268		ü	ü	ü	ü	ü					DNM1L_HUMAN Isoform 6 of Dynamin-1-like protein
O00458	IFRD1	4.81921								ü			IFRD1_HUMAN Interferon-related developmental regulator 1
O00471	EXOC5	11.256			ü		ü						EXOC5_HUMAN Exocyst complex component 5
O00483	NDUFA4	7.50484	ü			ü							NDUA4_HUMAN NADH dehydrogenase [ubiquinone] 1 alpha subcomplex subunit 4
O00487	PSMD14	6.67001	ü				ü			ü	ü		PSDE_HUMAN 26S proteasome non-ATPase regulatory subunit 14
O00505	KPNA3	12.8384					ü			ü			IMA4_HUMAN Importin subunit alpha-4
O00506	STK25	8.73862	ü	ü									STK25_HUMAN Serine/threonine-protein kinase 25
O00515	LAD1	17.2596	ü										LAD1_HUMAN Ladinin-1
O00541	PES1	8.75517								ü			PESC_HUMAN Pescadillo homolog
O00560	SDCBP	6.54963	ü		ü		ü	ü		ü			SDCB1_HUMAN Syntenin-1
O00566	MPHOSPH10	10.018								ü			MPP10_HUMAN U3 small nucleolar ribonucleoprotein protein MPP10
O00567	NOP56	5.45699								ü			NOP56_HUMAN Nucleolar protein 56
O00570	SOX1	11.6534								ü			SOX1_HUMAN Transcription factor SOX-1
O00571	DDX3X	8.63304	ü			ü	ü			ü		ü	DDX3X_HUMAN ATP-dependent RNA helicase DDX3X
O00629	KPNA4	14.6791	ü				ü			ü			IMA3_HUMAN Importin subunit alpha-3
O00743-3	PPP6C	6.54715		ü			ü						PPP6_HUMAN Isoform 3 of Serine/threonine-protein phosphatase 6 catalytic subunit
O00757	FBP2	17.0265	ü		ü		ü			ü			F16P2_HUMAN Fructose-1,6-bisphosphatase isozyme 2
O00762	UBE2C	4.00478			ü		ü			ü			UBE2C_HUMAN Ubiquitin-conjugating enzyme E2 C
O00767	SCD	2.71886											ACOD_HUMAN Acyl-CoA desaturase
O14497	ARID1A	16.4409								ü			ARI1A_HUMAN AT-rich interactive domain-containing protein 1A
O14530	TXNDC9	5.03156						ü		ü			TXND9_HUMAN Thioredoxin domain-containing protein 9
O14548	COX7A2L	3.73463				ü							COX7R_HUMAN Cytochrome c oxidase subunit 7A-related protein, mitochondrial
O14562	UBFD1	11.7682											UBFD1_HUMAN Ubiquitin domain-containing protein UBFD1
O14578-4	CIT	6.15912		ü			ü						CTRO_HUMAN Isoform 4 of Citron Rho-interacting kinase
O14617-5	AP3D1	17.4905		ü	ü				ü	ü			AP3D1_HUMAN Isoform 5 of AP-3 complex subunit delta-1
O14647	CHD2	6.9656	ü							ü			CHD2_HUMAN Chromodomain-helicase-DNA-binding protein 2
O14656	TOR1A	17.8279	ü		ü			ü		ü			TOR1A_HUMAN Torsin-1A
O14657	TOR1B	11.675	ü							ü			TOR1B_HUMAN Torsin-1B
O14672	ADAM10	3.90176	ü	ü	ü					ü			ADA10_HUMAN Disintegrin and metalloproteinase domain-containing protein 10
O14681	EI24	19.3077		ü						ü			EI24_HUMAN Etoposide-induced protein 2.4 homolog
O14733-2	MAP2K7	7.60781					ü			ü			MP2K7_HUMAN Isoform 2 of Dual specificity mitogen-activated protein kinase kinase 7
O14737	PDCD5	7.66162	ü				ü			ü			PDCD5_HUMAN Programmed cell death protein 5
O14744	PRMT5	7.07004		ü			ü			ü			ANM5_HUMAN Protein arginine N-methyltransferase 5
O14745	SLC9A3R1	13.1079	ü		ü			ü		ü			NHRF1_HUMAN Na(+)/H(+) exchange regulatory cofactor NHE-RF1
O14753	OVOL1	3.68127								ü			OVOL1_HUMAN Putative transcription factor Ovo-like 1
O14757	CHEK1	5.65419					ü	ü		ü			CHK1_HUMAN Serine/threonine-protein kinase Chk1
O14776	TCERG1	10.1978						ü		ü			TCRG1_HUMAN Transcription elongation regulator 1
O14777	NDC80	4.79488					ü			ü			NDC80_HUMAN Kinetochore protein NDC80 homolog
O14786	NRP1	3.2536			ü		ü	ü					NRP1_HUMAN Neuropilin-1
O14787	TNPO2	16.3055								ü			TNPO2_HUMAN Transportin-2
O14818	PSMA7	1.6054	ü				ü			ü	ü		PSA7_HUMAN Proteasome subunit alpha type-7
O14832	PHYH	5.70445				ü							PAHX_HUMAN Phytanoyl-CoA dioxygenase, peroxisomal
O14874	BCKDK	6.421				ü							BCKD_HUMAN [3-methyl-2-oxobutanoate dehydrogenase [lipoamide]] kinase, mitochondrial
O14907	TAX1BP3	9.82351	ü		ü		ü			ü			TX1B3_HUMAN Tax1-binding protein 3
O14910	LIN7A	9.53697	ü		ü								LIN7A_HUMAN Protein lin-7 homolog A
O14929	HAT1	13.2104								ü			HAT1_HUMAN Histone acetyltransferase type B catalytic subunit
O14949	UQCRQ	6.3539				ü							QCR8_HUMAN Cytochrome b-c1 complex subunit 8
O14950	MYL12B	2.62159	ü				ü	ü					ML12B_HUMAN Myosin regulatory light chain 12B
O14964	HGS	10.0646	ü				ü						HGS_HUMAN Hepatocyte growth factor-regulated tyrosine kinase substrate
O14965	AURKA	4.04663					ü	ü		ü			AURKA_HUMAN Aurora kinase A
O14967	CLGN	7.68371								ü			CLGN_HUMAN Calmegin
O14974	PPP1R12A	10.7632					ü	ü		ü			MYPT1_HUMAN Protein phosphatase 1 regulatory subunit 12A
O14975	SLC27A2	15.2575	ü		ü	ü							S27A2_HUMAN Very long-chain acyl-CoA synthetase
O14976	GAK	12.3998		ü	ü		ü						GAK_HUMAN Cyclin-G-associated kinase
O14979	HNRNPDL	9.55275	ü							ü			HNRDL_HUMAN Heterogeneous nuclear ribonucleoprotein D-like
O14980	XPO1	13.0046					ü			ü			XPO1_HUMAN Exportin-1
O15020	SPTBN2	11.9797			ü		ü	ü					SPTN2_HUMAN Spectrin beta chain, non-erythrocytic 2
O15037	KHNYN	7.9244											KHNYN_HUMAN Protein KHNYN
O15042	U2SURP	7.72137								ü			SR140_HUMAN U2 snRNP-associated SURP motif-containing protein
O15090	ZNF536	3.57384								ü			ZN536_HUMAN Zinc finger protein 536
O15091	KIAA0391	9.30899				ü							MRRP3_HUMAN Mitochondrial ribonuclease P protein 3
O15119	TBX3	4.59647								ü			TBX3_HUMAN T-box transcription factor TBX3
O15143	ARPC1B	8.95655	ü				ü	ü					ARC1B_HUMAN Actin-related protein 2/3 complex subunit 1B
O15144	ARPC2	6.80223	ü	ü			ü	ü					ARPC2_HUMAN Actin-related protein 2/3 complex subunit 2
O15145	ARPC3	8.37438	ü				ü	ü					ARPC3_HUMAN Actin-related protein 2/3 complex subunit 3
O15155	BET1	11.3892		ü									BET1_HUMAN BET1 homolog
O15162	PLSCR1	11.679	ü	ü	ü		ü			ü			PLS1_HUMAN Phospholipid scramblase 1
O15164	TRIM24	9.4152					ü			ü			TIF1A_HUMAN Transcription intermediary factor 1-alpha
O15173-2	PGRMC2	12.2205								ü			PGRC2_HUMAN Isoform 2 of Membrane-associated progesterone receptor component 2
O15198	SMAD9	5.03704					ü			ü			SMAD9_HUMAN Mothers against decapentaplegic homolog 9
O15226-2	NKRF	11.1672								ü			NKRF_HUMAN Isoform 2 of NF-kappa-B-repressing factor
O15230	LAMA5	6.77431	ü		ü					ü			LAMA5_HUMAN Laminin subunit alpha-5
O15231-6	ZNF185	11.8527						ü					ZN185_HUMAN Isoform 6 of Zinc finger protein 185
O15258	RER1	17.081		ü	ü								RER1_HUMAN Protein RER1
O15269	SPTLC1	6.56576											SPTC1_HUMAN Serine palmitoyltransferase 1
O15270	SPTLC2	10.6409				ü							SPTC2_HUMAN Serine palmitoyltransferase 2
O15297	PPM1D	2.50405								ü			PPM1D_HUMAN Protein phosphatase 1D
O15305	PMM2	10.8951	ü				ü						PMM2_HUMAN Phosphomannomutase 2
O15321	TM9SF1	13.9074							ü				TM9S1_HUMAN Transmembrane 9 superfamily member 1
O15347	HMGB3	15.9491								ü			HMGB3_HUMAN High mobility group protein B3
O15355	PPM1G	4.25426								ü			PPM1G_HUMAN Protein phosphatase 1G
O15371	EIF3D	9.65655					ü						EIF3D_HUMAN Eukaryotic translation initiation factor 3 subunit D
O15372	EIF3H	5.62711	ü				ü						EIF3H_HUMAN Eukaryotic translation initiation factor 3 subunit H
O15397	IPO8	11.6163					ü			ü			IPO8_HUMAN Importin-8
O15417	TNRC18	2.06423				ü				ü			TNC18_HUMAN Trinucleotide repeat-containing gene 18 protein
O15446-2	CD3EAP	15.0651				ü				ü			RPA34_HUMAN Isoform 2 of DNA-directed RNA polymerase I subunit RPA34
O15460	P4HA2	2.98964								ü			P4HA2_HUMAN Prolyl 4-hydroxylase subunit alpha-2
O15498	YKT6	14.5895	ü	ü	ü	ü	ü						YKT6_HUMAN Synaptobrevin homolog YKT6
O15511-2	ARPC5	3.69481	ü				ü	ü					ARPC5_HUMAN Isoform 2 of Actin-related protein 2/3 complex subunit 5
O15530	PDPK1	10.6148			ü		ü			ü			PDPK1_HUMAN 3-phosphoinositide-dependent protein kinase 1
O15551	CLDN3	8.97626	ü		ü								CLD3_HUMAN Claudin-3
O43143	DHX15	14.9708								ü			DHX15_HUMAN Putative pre-mRNA-splicing factor ATP-dependent RNA helicase DHX15
O43148-2	RNMT	13.5143								ü			MCES_HUMAN Isoform 2 of mRNA cap guanine-N7 methyltransferase
O43166	SIPA1L1	10.5182			ü			ü					SI1L1_HUMAN Signal-induced proliferation-associated 1-like protein 1
O43172	PRPF4	13.0906								ü			PRP4_HUMAN U4/U6 small nuclear ribonucleoprotein Prp4
O43175	PHGDH	8.82878	ü				ü						SERA_HUMAN D-3-phosphoglycerate dehydrogenase
O43181	NDUFS4	7.46926				ü							NDUS4_HUMAN NADH dehydrogenase [ubiquinone] iron-sulfur protein 4, mitochondrial
O43242	PSMD3	14.7761	ü				ü			ü	ü		PSMD3_HUMAN 26S proteasome non-ATPase regulatory subunit 3
O43251-8	RBFOX2	19.3887								ü			RFOX2_HUMAN Isoform 8 of RNA binding protein fox-1 homolog 2
O43290	SART1	11.0673		ü			ü			ü			SNUT1_HUMAN U4/U6.U5 tri-snRNP-associated protein 1
O43293	DAPK3	2.88775						ü		ü			DAPK3_HUMAN Death-associated protein kinase 3
O43390	HNRNPR	13.4123								ü			HNRPR_HUMAN Heterogeneous nuclear ribonucleoprotein R
O43390-2	HNRNPR	12.6418								ü			HNRPR_HUMAN Isoform 2 of Heterogeneous nuclear ribonucleoprotein R
O43395	PRPF3	9.19903								ü			PRPF3_HUMAN U4/U6 small nuclear ribonucleoprotein Prp3
O43396	TXNL1	12.3843	ü			ü				ü	ü		TXNL1_HUMAN Thioredoxin-like protein 1
O43402	EMC8	16.906				ü				ü			EMC8_HUMAN ER membrane protein complex subunit 8
O43427	FIBP	3.58105	ü			ü				ü			FIBP_HUMAN Acidic fibroblast growth factor intracellular-binding protein
O43432-3	EIF4G3	6.54345					ü						IF4G3_HUMAN Isoform 3 of Eukaryotic translation initiation factor 4 gamma 3
O43447	PPIH	16.0228								ü			PPIH_HUMAN Peptidyl-prolyl cis-trans isomerase H
O43488	AKR7A2	16.9931	ü	ü		ü	ü						ARK72_HUMAN Aflatoxin B1 aldehyde reductase member 2
O43505	B3GNT1	8.95539	ü	ü									B3GN1_HUMAN N-acetyllactosaminide beta-1,3-N-acetylglucosaminyltransferase
O43524	FOXO3	5.56566				ü	ü			ü			FOXO3_HUMAN Forkhead box protein O3
O43583	DENR	14.0171										ü	DENR_HUMAN Density-regulated protein
O43615	TIMM44	12.0547				ü							TIM44_HUMAN Mitochondrial import inner membrane translocase subunit TIM44
O43617	TRAPPC3	6.27794		ü			ü						TPPC3_HUMAN Trafficking protein particle complex subunit 3
O43633	CHMP2A	9.03006	ü				ü			ü			CHM2A_HUMAN Charged multivesicular body protein 2a
O43657	TSPAN6	6.88671	ü		ü								TSN6_HUMAN Tetraspanin-6
O43663	PRC1	6.1471					ü	ü		ü			PRC1_HUMAN Protein regulator of cytokinesis 1
O43665-3	RGS10	9.95472					ü			ü			RGS10_HUMAN Isoform 3 of Regulator of G-protein signaling 10
O43670-4	ZNF207	10.0998						ü		ü			ZN207_HUMAN Isoform 4 of Zinc finger protein 207
O43674	NDUFB5	6.18716				ü				ü			NDUB5_HUMAN NADH dehydrogenase [ubiquinone] 1 beta subcomplex subunit 5, mitochondrial
O43681	ASNA1	18.3372	ü							ü			ASNA_HUMAN ATPase ASNA1
O43684	BUB3	13.0536					ü			ü			BUB3_HUMAN Mitotic checkpoint protein BUB3
O43707	ACTN4	16.6943	ü					ü		ü			ACTN4_HUMAN Alpha-actinin-4
O43708	GSTZ1	12.8147				ü	ü						MAAI_HUMAN Maleylacetoacetate isomerase
O43709	WBSCR22	5.42793								ü			WBS22_HUMAN Ribosome biogenesis methyltransferase WBSCR22
O43719	HTATSF1	14.2799								ü			HTSF1_HUMAN HIV Tat-specific factor 1
O43747-2	AP1G1	8.01141		ü			ü		ü				AP1G1_HUMAN Isoform 2 of AP-1 complex subunit gamma-1
O43768-4	ENSA	7.01921								ü			ENSA_HUMAN Isoform 4 of Alpha-endosulfine
O43776	NARS	17.6553	ü			ü	ü						SYNC_HUMAN Asparagine--tRNA ligase, cytoplasmic
O43795	MYO1B	11.4855	ü	ü	ü			ü					MYO1B_HUMAN Unconventional myosin-Ib
O43809	NUDT21	34.849						ü		ü			CPSF5_HUMAN Cleavage and polyadenylation specificity factor subunit 5
O43837	IDH3B	11.7682				ü				ü			IDH3B_HUMAN Isocitrate dehydrogenase [NAD] subunit beta, mitochondrial
O43865	AHCYL1	5.97489	ü		ü		ü						SAHH2_HUMAN Putative adenosylhomocysteinase 2
O43933	PEX1	6.89424	ü				ü						PEX1_HUMAN Peroxisome biogenesis factor 1
O60216	RAD21	7.15396					ü			ü			RAD21_HUMAN Double-strand-break repair protein rad21 homolog
O60237	PPP1R12B	14.4195					ü	ü		ü			MYPT2_HUMAN Protein phosphatase 1 regulatory subunit 12B
O60238	BNIP3L	2.46295				ü	ü			ü			BNI3L_HUMAN BCL2/adenovirus E1B 19 kDa protein-interacting protein 3-like
O60264	SMARCA5	5.18202								ü			SMCA5_HUMAN SWI/SNF-related matrix-associated actin-dependent regulator of chromatin subfamily A member 5
O60271	SPAG9	10.9174	ü		ü		ü	ü					JIP4_HUMAN C-Jun-amino-terminal kinase-interacting protein 4
O60292	SIPA1L3	17.6733			ü			ü					SI1L3_HUMAN Signal-induced proliferation-associated 1-like protein 3
O60313-2	OPA1	12.5707				ü				ü			OPA1_HUMAN Isoform 2 of Dynamin-like 120 kDa protein, mitochondrial
O60333-3	KIF1B	6.38904				ü		ü					KIF1B_HUMAN Isoform 3 of Kinesin-like protein KIF1B
O60333-4	KIF1B	6.96071				ü		ü					KIF1B_HUMAN Isoform 4 of Kinesin-like protein KIF1B
O60437	PPL	9.74069	ü		ü	ü		ü		ü			PEPL_HUMAN Periplakin
O60476	MAN1A2	9.79298	ü	ü									MA1A2_HUMAN Mannosyl-oligosaccharide 1,2-alpha-mannosidase IB
O60493	SNX3	6.9204	ü				ü						SNX3_HUMAN Sorting nexin-3
O60502	MGEA5	3.59647					ü			ü			NCOAT_HUMAN Bifunctional protein NCOAT
O60506	SYNCRIP	14.8362								ü			HNRPQ_HUMAN Heterogeneous nuclear ribonucleoprotein Q
O60508	CDC40	4.10171								ü			PRP17_HUMAN Pre-mRNA-processing factor 17
O60513	B4GALT4	7.57869		ü									B4GT4_HUMAN Beta-1,4-galactosyltransferase 4
O60563	CCNT1	14.3005								ü			CCNT1_HUMAN Cyclin-T1
O60610	DIAPH1	5.61253			ü		ü	ü					DIAP1_HUMAN Protein diaphanous homolog 1
O60645	EXOC3	12.1647			ü		ü						EXOC3_HUMAN Exocyst complex component 3
O60664	PLIN3	8.35117		ü			ü						PLIN3_HUMAN Perilipin-3
O60669	SLC16A7	5.20889			ü								MOT2_HUMAN Monocarboxylate transporter 2
O60678	PRMT3	10.7715					ü					ü	ANM3_HUMAN Protein arginine N-methyltransferase 3
O60684	KPNA6	11.2214					ü			ü			IMA7_HUMAN Importin subunit alpha-7
O60701	UGDH	15.9528	ü				ü			ü			UGDH_HUMAN UDP-glucose 6-dehydrogenase
O60716	CTNND1	10.1799	ü		ü		ü			ü			CTND1_HUMAN Catenin delta-1
O60749	SNX2	13.6178	ü		ü		ü						SNX2_HUMAN Sorting nexin-2
O60762	DPM1	11.8588								ü			DPM1_HUMAN Dolichol-phosphate mannosyltransferase
O60825	PFKFB2	14.4466					ü						F262_HUMAN 6-phosphofructo-2-kinase/fructose-2,6-bisphosphatase 2
O60832	DKC1	3.90682								ü			DKC1_HUMAN H/ACA ribonucleoprotein complex subunit 4
O60841	EIF5B	10.0151					ü			ü			IF2P_HUMAN Eukaryotic translation initiation factor 5B
O60870	KIN	7.97913								ü			KIN17_HUMAN DNA/RNA-binding protein KIN17
O60884	DNAJA2	11.0939	ü				ü						DNJA2_HUMAN DnaJ homolog subfamily A member 2
O60885	BRD4	5.78925								ü			BRD4_HUMAN Bromodomain-containing protein 4
O60911	CTSV	2.21439	ü		ü				ü	ü			CATL2_HUMAN Cathepsin L2
O60925	PFDN1	14.6203											PFD1_HUMAN Prefoldin subunit 1
O60930	RNASEH1	3.42346											RNH1_HUMAN Ribonuclease H1
O60934	NBN	9.023					ü			ü			NBN_HUMAN Nibrin
O75083	WDR1	10.5038	ü		ü		ü	ü					WDR1_HUMAN WD repeat-containing protein 1
O75110	ATP9A	6.10487		ü	ü								ATP9A_HUMAN Probable phospholipid-transporting ATPase IIA
O75112-7	LDB3	11.0904						ü					LDB3_HUMAN Isoform 7 of LIM domain-binding protein 3
O75116	ROCK2	5.84737			ü		ü	ü		ü			ROCK2_HUMAN Rho-associated protein kinase 2
O75122	CLASP2	15.4101		ü	ü		ü	ü					CLAP2_HUMAN CLIP-associating protein 2
O75127	PTCD1	7.56381				ü							PTCD1_HUMAN Pentatricopeptide repeat-containing protein 1, mitochondrial
O75128-2	COBL	13.3786			ü			ü					COBL_HUMAN Isoform 2 of Protein cordon-bleu
O75131	CPNE3	13.9691	ü		ü		ü			ü			CPNE3_HUMAN Copine-3
O75146	HIP1R	14.3717			ü	ü		ü					HIP1R_HUMAN Huntingtin-interacting protein 1-related protein
O75151	PHF2	12.8958								ü			PHF2_HUMAN Lysine-specific demethylase PHF2
O75152	ZC3H11A	9.97334								ü			ZC11A_HUMAN Zinc finger CCCH domain-containing protein 11A
O75155	CAND2	14.773								ü			CAND2_HUMAN Cullin-associated NEDD8-dissociated protein 2
O75175	CNOT3	6.14492					ü			ü			CNOT3_HUMAN CCR4-NOT transcription complex subunit 3
O75190	DNAJB6	6.57261					ü			ü			DNJB6_HUMAN DnaJ homolog subfamily B member 6
O75190-2	DNAJB6	4.58643					ü			ü			DNJB6_HUMAN Isoform B of DnaJ homolog subfamily B member 6
O75208	COQ9	10.2765				ü							COQ9_HUMAN Ubiquinone biosynthesis protein COQ9, mitochondrial
O75306	NDUFS2	6.44968				ü				ü			NDUS2_HUMAN NADH dehydrogenase [ubiquinone] iron-sulfur protein 2, mitochondrial
O75319	DUSP11	4.69867								ü			DUS11_HUMAN RNA/RNP complex-1-interacting phosphatase
O75323	GBAS	15.7105				ü							NIPS2_HUMAN Protein NipSnap homolog 2
O75330-3	HMMR	3.3738			ü		ü						HMMR_HUMAN Isoform 3 of Hyaluronan mediated motility receptor
O75334	PPFIA2	13.0659	ü		ü		ü						LIPA2_HUMAN Liprin-alpha-2
O75351	VPS4B	9.43956	ü				ü	ü		ü			VPS4B_HUMAN Vacuolar protein sorting-associated protein 4B
O75352	MPDU1	13.65	ü			ü							MPU1_HUMAN Mannose-P-dolichol utilization defect 1 protein
O75362	ZNF217	3.7784								ü			ZN217_HUMAN Zinc finger protein 217
O75367	H2AFY	14.9289	ü							ü			H2AY_HUMAN Core histone macro-H2A.1
O75369-8	FLNB	12.3512	ü		ü		ü	ü					FLNB_HUMAN Isoform 8 of Filamin-B
O75376	NCOR1	9.61103						ü		ü			NCOR1_HUMAN Nuclear receptor corepressor 1
O75386	TULP3	4.3414			ü			ü		ü			TULP3_HUMAN Tubby-related protein 3
O75390	CS	15.0455	ü			ü				ü			CISY_HUMAN Citrate synthase, mitochondrial
O75391	SPAG7	9.66463								ü			SPAG7_HUMAN Sperm-associated antigen 7
O75394	MRPL33	9.01831				ü						ü	RM33_HUMAN 39S ribosomal protein L33, mitochondrial
O75396	SEC22B	11.4969		ü									SC22B_HUMAN Vesicle-trafficking protein SEC22b
O75400	PRPF40A	9.37699								ü			PR40A_HUMAN Pre-mRNA-processing factor 40 homolog A
O75431	MTX2	7.84014				ü							MTX2_HUMAN Metaxin-2
O75436	VPS26A	15.2073	ü		ü		ü						VP26A_HUMAN Vacuolar protein sorting-associated protein 26A
O75438-2	NDUFB1	1.55883	ü			ü							NDUB1_HUMAN Isoform 2 of NADH dehydrogenase [ubiquinone] 1 beta subcomplex subunit 1
O75439	PMPCB	8.27638				ü							MPPB_HUMAN Mitochondrial-processing peptidase subunit beta
O75449	KATNA1	6.41387						ü		ü			KTNA1_HUMAN Katanin p60 ATPase-containing subunit A1
O75475	PSIP1	13.4959					ü			ü			PSIP1_HUMAN PC4 and SFRS1-interacting protein
O75496	GMNN	5.45399					ü			ü			GEMI_HUMAN Geminin
O75521	ECI2	16.5271				ü				ü			ECI2_HUMAN Enoyl-CoA delta isomerase 2, mitochondrial
O75526	RBMXL2	38.0223								ü			RMXL2_HUMAN RNA-binding motif protein, X-linked-like-2
O75528	TADA3	3.48105						ü		ü			TADA3_HUMAN Transcriptional adapter 3
O75530-2	EED	5.62118								ü			EED_HUMAN Isoform 2 of Polycomb protein EED
O75531	BANF1	16.4409	ü				ü			ü			BAF_HUMAN Barrier-to-autointegration factor
O75533	SF3B1	9.90493								ü			SF3B1_HUMAN Splicing factor 3B subunit 1
O75534-3	CSDE1	2.19782		ü	ü	ü							CSDE1_HUMAN Isoform 3 of Cold shock domain-containing protein E1
O75582	RPS6KA5	8.67084								ü			KS6A5_HUMAN Ribosomal protein S6 kinase alpha-5
O75608	LYPLA1	12.1861	ü		ü	ü	ü						LYPA1_HUMAN Acyl-protein thioesterase 1
O75616	ERAL1	11.0058				ü		ü					ERAL1_HUMAN GTPase Era, mitochondrial
O75643	SNRNP200	3.48385								ü			U520_HUMAN U5 small nuclear ribonucleoprotein 200 kDa helicase
O75648	TRMU	14.1228				ü				ü			MTU1_HUMAN Mitochondrial tRNA-specific 2-thiouridylase 1
O75674	TOM1L1	5.72565	ü	ü			ü		ü				TM1L1_HUMAN TOM1-like protein 1
O75676	RPS6KA4	6.68416								ü		ü	KS6A4_HUMAN Ribosomal protein S6 kinase alpha-4
O75683	SURF6	7.58201					ü			ü		ü	SURF6_HUMAN Surfeit locus protein 6
O75691	UTP20	9.08569			ü					ü			UTP20_HUMAN Small subunit processome component 20 homolog
O75694	NUP155	10.2537								ü			NU155_HUMAN Nuclear pore complex protein Nup155
O75717	WDHD1	12.2768								ü			WDHD1_HUMAN WD repeat and HMG-box DNA-binding protein 1
O75718	CRTAP	3.14467											CRTAP_HUMAN Cartilage-associated protein
O75746	SLC25A12	12.4532				ü							CMC1_HUMAN Calcium-binding mitochondrial carrier protein Aralar1
O75787	ATP6AP2	5.30213	ü		ü								RENR_HUMAN Renin receptor
O75821	EIF3G	14.8712					ü			ü			EIF3G_HUMAN Eukaryotic translation initiation factor 3 subunit G
O75822	EIF3J	25.2054					ü						EIF3J_HUMAN Eukaryotic translation initiation factor 3 subunit J
O75828	CBR3	20.8152					ü			ü			CBR3_HUMAN Carbonyl reductase [NADPH] 3
O75832	PSMD10	12.903					ü	ü		ü	ü		PSD10_HUMAN 26S proteasome non-ATPase regulatory subunit 10
O75844	ZMPSTE24	21.1713	ü							ü			FACE1_HUMAN CAAX prenyl protease 1 homolog
O75845	SC5D	7.28172											SC5D_HUMAN Lathosterol oxidase
O75874	IDH1	12.3843	ü			ü	ü						IDHC_HUMAN Isocitrate dehydrogenase [NADP] cytoplasmic
O75879	PET112	9.08093				ü							GATB_HUMAN Glutamyl-tRNA(Gln) amidotransferase subunit B, mitochondrial
O75884	RBBP9	13.4097	ü							ü			RBBP9_HUMAN Putative hydrolase RBBP9
O75909-4	CCNK	10.4186								ü			CCNK_HUMAN Isoform 4 of Cyclin-K
O75914-3	PAK3	14.6388			ü		ü						PAK3_HUMAN Isoform 3 of Serine/threonine-protein kinase PAK 3
O75915	ARL6IP5	11.2396	ü		ü			ü					PRAF3_HUMAN PRA1 family protein 3
O75923-13	DYSF	11.6829	ü		ü								DYSF_HUMAN Isoform 13 of Dysferlin
O75934	BCAS2	1.73878								ü			SPF27_HUMAN Pre-mRNA-splicing factor SPF27
O75937	DNAJC8	15.8724								ü			DNJC8_HUMAN DnaJ homolog subfamily C member 8
O75940	SMNDC1	9.89927								ü			SPF30_HUMAN Survival of motor neuron-related-splicing factor 30
O75947	ATP5H	8.71774	ü			ü				ü			ATP5H_HUMAN ATP synthase subunit d, mitochondrial
O75955	FLOT1	4.55209	ü		ü			ü	ü	ü			FLOT1_HUMAN Flotillin-1
O75962	TRIO	10.1116					ü						TRIO_HUMAN Triple functional domain protein
O75964	ATP5L	3.89606	ü			ü							ATP5L_HUMAN ATP synthase subunit g, mitochondrial
O76003	GLRX3	14.9321	ü		ü					ü			GLRX3_HUMAN Glutaredoxin-3
O76021	RSL1D1	16.6103					ü			ü		ü	RL1D1_HUMAN Ribosomal L1 domain-containing protein 1
O76031	CLPX	10.9519			ü	ü				ü			CLPX_HUMAN ATP-dependent Clp protease ATP-binding subunit clpX-like, mitochondrial
O76041-2	NEBL	12.8076	ü					ü					NEBL_HUMAN Isoform 2 of Nebulette
O76062	TM7SF2	6.91419			ü					ü			ERG24_HUMAN Delta(14)-sterol reductase
O76080	ZFAND5	1.76661											ZFAN5_HUMAN AN1-type zinc finger protein 5
O76094	SRP72	10.8034					ü			ü			SRP72_HUMAN Signal recognition particle subunit SRP72
O76095	JTB	8.29421			ü	ü		ü					JTB_HUMAN Protein JTB
O94776	MTA2	6.02265								ü			MTA2_HUMAN Metastasis-associated protein MTA2
O94804	STK10	17.8004	ü		ü								STK10_HUMAN Serine/threonine-protein kinase 10
O94822-3	LTN1	5.442											LTN1_HUMAN Isoform 3 of E3 ubiquitin-protein ligase listerin
O94826	TOMM70A	11.9797	ü			ü							TOM70_HUMAN Mitochondrial import receptor subunit TOM70
O94855-2	SEC24D	8.25568		ü			ü						SC24D_HUMAN Isoform 2 of Protein transport protein Sec24D
O94874	UFL1	13.7067					ü			ü			UFL1_HUMAN E3 UFM1-protein ligase 1
O94874-3	UFL1	>200					ü			ü			UFL1_HUMAN Isoform 3 of E3 UFM1-protein ligase 1
O94885	SASH1	5.83506											SASH1_HUMAN SAM and SH3 domain-containing protein 1
O94888	UBXN7	12.0192								ü			UBXN7_HUMAN UBX domain-containing protein 7
O94903	PROSC	13.5327	ü			ü							PROSC_HUMAN Proline synthase co-transcribed bacterial homolog protein
O94906	PRPF6	4.85567								ü			PRP6_HUMAN Pre-mRNA-processing factor 6
O94913	PCF11	7.78817								ü			PCF11_HUMAN Pre-mRNA cleavage complex 2 protein Pcf11
O94925	GLS	13.9186				ü	ü						GLSK_HUMAN Glutaminase kidney isoform, mitochondrial
O94952	FBXO21	4.8229											FBX21_HUMAN F-box only protein 21
O94955	RHOBTB3	2.96483	ü	ü	ü		ü						RHBT3_HUMAN Rho-related BTB domain-containing protein 3
O94964-2	SOGA1	10.9209	ü										SOGA1_HUMAN Isoform 2 of Protein SOGA1
O94966-5	USP19	8.83891					ü						UBP19_HUMAN Isoform 5 of Ubiquitin carboxyl-terminal hydrolase 19
O94972	TRIM37	1.34333					ü			ü			TRI37_HUMAN E3 ubiquitin-protein ligase TRIM37
O94979-8	SEC31A	15.8		ü			ü						SC31A_HUMAN Isoform 8 of Protein transport protein Sec31A
O95067	CCNB2	2.9428					ü	ü		ü			CCNB2_HUMAN G2/mitotic-specific cyclin-B2
O95071	UBR5	6.13513								ü			UBR5_HUMAN E3 ubiquitin-protein ligase UBR5
O95084	PRSS23	0.411083	ü							ü			PRS23_HUMAN Serine protease 23
O95104	SCAF4	11.1421								ü			SFR15_HUMAN Splicing factor, arginine/serine-rich 15
O95139	NDUFB6	7.13849				ü				ü			NDUB6_HUMAN NADH dehydrogenase [ubiquinone] 1 beta subcomplex subunit 6
O95140	MFN2	7.54323				ü	ü	ü					MFN2_HUMAN Mitofusin-2
O95163	IKBKAP	7.44199								ü			ELP1_HUMAN Elongator complex protein 1
O95166	GABARAP	4.81586		ü	ü		ü	ü	ü				GBRAP_HUMAN Gamma-aminobutyric acid receptor-associated protein
O95182	NDUFA7	7.01779				ü						ü	NDUA7_HUMAN NADH dehydrogenase [ubiquinone] 1 alpha subcomplex subunit 7
O95197	RTN3	20.0274	ü	ü	ü								RTN3_HUMAN Reticulon-3
O95201	ZNF205	4.733				ü				ü			ZN205_HUMAN Zinc finger protein 205
O95202	LETM1	11.5853				ü							LETM1_HUMAN LETM1 and EF-hand domain-containing protein 1, mitochondrial
O95208	EPN2	9.32527		ü						ü			EPN2_HUMAN Epsin-2
O95218	ZRANB2	11.9077								ü			ZRAB2_HUMAN Zinc finger Ran-binding domain-containing protein 2
O95229	ZWINT	2.24858					ü			ü			ZWINT_HUMAN ZW10 interactor
O95232	LUC7L3	10.3671								ü			LC7L3_HUMAN Luc7-like protein 3
O95239	KIF4A	12.5072					ü	ü		ü			KIF4A_HUMAN Chromosome-associated kinesin KIF4A
O95243	MBD4	7.63546								ü			MBD4_HUMAN Methyl-CpG-binding domain protein 4
O95249	GOSR1	10.304		ü			ü						GOSR1_HUMAN Golgi SNAP receptor complex member 1
O95292	VAPB	17.7684		ü									VAPB_HUMAN Vesicle-associated membrane protein-associated protein B/C
O95298	NDUFC2	3.8745			ü	ü							NDUC2_HUMAN NADH dehydrogenase [ubiquinone] 1 subunit C2
O95299	NDUFA10	6.45629				ü							NDUAA_HUMAN NADH dehydrogenase [ubiquinone] 1 alpha subcomplex subunit 10, mitochondrial
O95319-3	CELF2	12.7043								ü			CELF2_HUMAN Isoform 3 of CUGBP Elav-like family member 2
O95340-2	PAPSS2	12.3776					ü						PAPS2_HUMAN Isoform B of Bifunctional 3'-phosphoadenosine 5'-phosphosulfate synthase 2
O95347	SMC2	5.0543	ü				ü			ü			SMC2_HUMAN Structural maintenance of chromosomes protein 2
O95372	LYPLA2	11.4098	ü										LYPA2_HUMAN Acyl-protein thioesterase 2
O95373	IPO7	14.6822					ü			ü			IPO7_HUMAN Importin-7
O95391	SLU7	5.60617								ü			SLU7_HUMAN Pre-mRNA-splicing factor SLU7
O95402	MED26	4.72783								ü			MED26_HUMAN Mediator of RNA polymerase II transcription subunit 26
O95425	SVIL	15.0423			ü			ü		ü			SVIL_HUMAN Supervillin
O95433	AHSA1	12.5958	ü				ü						AHSA1_HUMAN Activator of 90 kDa heat shock protein ATPase homolog 1
O95453	PARN	8.67844					ü			ü			PARN_HUMAN Poly(A)-specific ribonuclease PARN
O95456	PSMG1	6.72632		ü						ü			PSMG1_HUMAN Proteasome assembly chaperone 1
O95470	SGPL1	17.06											SGPL1_HUMAN Sphingosine-1-phosphate lyase 1
O95471	CLDN7	8.86151			ü								CLD7_HUMAN Claudin-7
O95563	MPC2	6.82567				ü				ü			MPC2_HUMAN Mitochondrial pyruvate carrier 2
O95573	ACSL3	7.03774		ü	ü	ü							ACSL3_HUMAN Long-chain-fatty-acid--CoA ligase 3
O95630	STAMBP	9.83187	ü		ü					ü			STABP_HUMAN STAM-binding protein
O95671	ASMTL	7.91083											ASML_HUMAN N-acetylserotonin O-methyltransferase-like protein
O95716	RAB3D	15.7498	ü		ü	ü		ü					RAB3D_HUMAN Ras-related protein Rab-3D
O95747	OXSR1	17.3417	ü										OXSR1_HUMAN Serine/threonine-protein kinase OSR1
O95749	GGPS1	11.2433					ü						GGPPS_HUMAN Geranylgeranyl pyrophosphate synthase
O95758-4	PTBP3	11.0444								ü			PTBP3_HUMAN Isoform 4 of Polypyrimidine tract-binding protein 3
O95782	AP2A1	13.0266		ü	ü		ü		ü				AP2A1_HUMAN AP-2 complex subunit alpha-1
O95785	WIZ	18.583	ü							ü			WIZ_HUMAN Protein Wiz
O95793	STAU1	12.0694	ü		ü			ü					STAU1_HUMAN Double-stranded RNA-binding protein Staufen homolog 1
O95801	TTC4	11.9302											TTC4_HUMAN Tetratricopeptide repeat protein 4
O95817	BAG3	6.34634			ü		ü						BAG3_HUMAN BAG family molecular chaperone regulator 3
O95831	AIFM1	11.595				ü	ü			ü			AIFM1_HUMAN Apoptosis-inducing factor 1, mitochondrial
O95858	TSPAN15	5.82526	ü		ü								TSN15_HUMAN Tetraspanin-15
O95873	C6orf47	11.8547											CF047_HUMAN Uncharacterized protein C6orf47
O95881	TXNDC12	6.4383											TXD12_HUMAN Thioredoxin domain-containing protein 12
O95900	TRUB2	2.22569											TRUB2_HUMAN Probable tRNA pseudouridine synthase 2
O95994	AGR2	10.4421			ü	ü							AGR2_HUMAN Anterior gradient protein 2 homolog
O96000	NDUFB10	3.49721	ü			ü							NDUBA_HUMAN NADH dehydrogenase [ubiquinone] 1 beta subcomplex subunit 10
O96005	CLPTM1	14.3183			ü								CLPT1_HUMAN Cleft lip and palate transmembrane protein 1
O96008	TOMM40	10.5614	ü			ü				ü			TOM40_HUMAN Mitochondrial import receptor subunit TOM40 homolog
O96011	PEX11B	12.8313	ü										PX11B_HUMAN Peroxisomal membrane protein 11B
O96013	PAK4	9.60038		ü									PAK4_HUMAN Serine/threonine-protein kinase PAK 4
P00156	MT-CYB	13.2685				ü							CYB_HUMAN Cytochrome b
P00167	CYB5A	12.2768	ü			ü							CYB5_HUMAN Cytochrome b5
P00338-3	LDHA	14.7667	ü				ü			ü			LDHA_HUMAN Isoform 3 of L-lactate dehydrogenase A chain
P00367	GLUD1	5.86965				ü							DHE3_HUMAN Glutamate dehydrogenase 1, mitochondrial
P00387-3	CYB5R3	11.7922	ü			ü	ü						NB5R3_HUMAN Isoform 3 of NADH-cytochrome b5 reductase 3
P00390	GSR	4.10049	ü		ü	ü	ü						GSHR_HUMAN Glutathione reductase, mitochondrial
P00491	PNP	6.4599	ü				ü	ü		ü			PNPH_HUMAN Purine nucleoside phosphorylase
P00492	HPRT1	37.712	ü				ü						HPRT_HUMAN Hypoxanthine-guanine phosphoribosyltransferase
P00505	GOT2	22.7038	ü		ü	ü							AATM_HUMAN Aspartate aminotransferase, mitochondrial
P00558	PGK1	17.5658	ü				ü						PGK1_HUMAN Phosphoglycerate kinase 1
P00568	AK1	12.5185	ü				ü	ü					KAD1_HUMAN Adenylate kinase isoenzyme 1
P00966	ASS1	10.9901	ü			ü	ü		ü	ü			ASSY_HUMAN Argininosuccinate synthase
P00973-3	OAS1	14.3717				ü	ü			ü			OAS1_HUMAN Isoform p48 of 2'-5'-oligoadenylate synthase 1
P01111	NRAS	65.2681	ü	ü	ü								RASN_HUMAN GTPase NRas
P01116	KRAS	16.6182			ü	ü	ü						RASK_HUMAN GTPase KRas
P02545	LMNA	9.74069					ü	ü		ü			LMNA_HUMAN Prelamin-A/C
P02786	TFRC	7.46363	ü		ü								TFR1_HUMAN Transferrin receptor protein 1
P02794	FTH1	3.26586	ü			ü	ü		ü	ü			FRIH_HUMAN Ferritin heavy chain
P03372	ESR1	2.43124		ü	ü					ü			ESR1_HUMAN Estrogen receptor
P04049-2	RAF1	9.57782		ü	ü	ü	ü			ü			RAF1_HUMAN Isoform 2 of RAF proto-oncogene serine/threonine-protein kinase
P04062	GBA	4.87103	ü						ü				GLCM_HUMAN Glucosylceramidase
P04075-2	ALDOA	108.814	ü				ü	ü		ü			ALDOA_HUMAN Isoform 2 of Fructose-bisphosphate aldolase A
P04080	CSTB	18.8304	ü							ü			CYTB_HUMAN Cystatin-B
P04083	ANXA1	11.9385	ü		ü	ü			ü	ü			ANXA1_HUMAN Annexin A1
P04150-3	NR3C1	9.72565				ü		ü		ü			GCR_HUMAN Isoform Alpha-2 of Glucocorticoid receptor
P04156	PRNP	6.32088	ü	ü	ü	ü				ü			PRIO_HUMAN Major prion protein
P04181	OAT	10.0442				ü							OAT_HUMAN Ornithine aminotransferase, mitochondrial
P04183	TK1	8.36932					ü						KITH_HUMAN Thymidine kinase, cytosolic
P04406	GAPDH	13.8353	ü		ü		ü	ü		ü			G3P_HUMAN Glyceraldehyde-3-phosphate dehydrogenase
P04632	CAPNS1	1.91583	ü		ü		ü						CPNS1_HUMAN Calpain small subunit 1
P04792	HSPB1	7.49186	ü		ü		ü	ü		ü	ü		HSPB1_HUMAN Heat shock protein beta-1
P04798	CYP1A1	1.71431				ü							CP1A1_HUMAN Cytochrome P450 1A1
P04843	RPN1	9.51211											RPN1_HUMAN Dolichyl-diphosphooligosaccharide--protein glycosyltransferase subunit 1
P04844	RPN2	5.78394								ü			RPN2_HUMAN Dolichyl-diphosphooligosaccharide--protein glycosyltransferase subunit 2
P04899-4	GNAI2	9.24936	ü		ü		ü	ü		ü			GNAI2_HUMAN Isoform sGi2 of Guanine nucleotide-binding protein G(i) subunit alpha-2
P05026	ATP1B1	6.0521	ü		ü								AT1B1_HUMAN Sodium/potassium-transporting ATPase subunit beta-1
P05114	HMGN1	33.453								ü			HMGN1_HUMAN Non-histone chromosomal protein HMG-14
P05141	SLC25A5	12.9078	ü		ü	ü		ü		ü			ADT2_HUMAN ADP/ATP translocase 2
P05161	ISG15	11.151					ü			ü			ISG15_HUMAN Ubiquitin-like protein ISG15
P05198	EIF2S1	14.6419	ü				ü			ü		ü	IF2A_HUMAN Eukaryotic translation initiation factor 2 subunit 1
P05204	HMGN2	35.1495								ü			HMGN2_HUMAN Non-histone chromosomal protein HMG-17
P05386	RPLP1	6.8351	ü				ü					ü	RLA1_HUMAN 60S acidic ribosomal protein P1
P05387	RPLP2	9.73658	ü				ü					ü	RLA2_HUMAN 60S acidic ribosomal protein P2
P05388	RPLP0	14.5956	ü				ü			ü		ü	RLA0_HUMAN 60S acidic ribosomal protein P0
P05455	SSB	11.9016								ü			LA_HUMAN Lupus La protein
P05556	ITGB1	4.24436	ü		ü								ITB1_HUMAN Integrin beta-1
P05556-3	ITGB1	13.2457	ü		ü								ITB1_HUMAN Isoform 3 of Integrin beta-1
P06280	GLA	4.45553	ü	ü					ü				AGAL_HUMAN Alpha-galactosidase A
P06396	GSN	15.8217	ü		ü		ü	ü		ü			GELS_HUMAN Gelsolin
P06400	RB1	8.90248						ü		ü			RB_HUMAN Retinoblastoma-associated protein
P06401	PGR	9.02066			ü	ü				ü			PRGR_HUMAN Progesterone receptor
P06493	CDK1	10.2506	ü		ü	ü	ü	ü		ü			CDK1_HUMAN Cyclin-dependent kinase 1
P06576	ATP5B	4.96773	ü		ü	ü				ü			ATPB_HUMAN ATP synthase subunit beta, mitochondrial
P06703	S100A6	11.0216	ü		ü		ü			ü			S10A6_HUMAN Protein S100-A6
P06730-2	EIF4E	17.86	ü				ü						IF4E_HUMAN Isoform 2 of Eukaryotic translation initiation factor 4E
P06733	ENO1	11.9611	ü		ü		ü			ü			ENOA_HUMAN Alpha-enolase
P06744-2	GPI	2.58676	ü		ü		ü			ü			G6PI_HUMAN Isoform 2 of Glucose-6-phosphate isomerase
P06748	NPM1	12.6004					ü	ü		ü			NPM_HUMAN Nucleophosmin
P06753	TPM3	7.36842	ü				ü	ü					TPM3_HUMAN Tropomyosin alpha-3 chain
P07099	EPHX1	10.9537											HYEP_HUMAN Epoxide hydrolase 1
P07108-5	DBI	29.877	ü	ü									ACBP_HUMAN Isoform 5 of Acyl-CoA-binding protein
P07195	LDHB	80.9751	ü			ü	ü						LDHB_HUMAN L-lactate dehydrogenase B chain
P07237	P4HB	7.54487	ü		ü								PDIA1_HUMAN Protein disulfide-isomerase
P07305	H1F0	14.8904		ü				ü		ü			H10_HUMAN Histone H1.0
P07355-2	ANXA2	14.729	ü		ü		ü		ü	ü			ANXA2_HUMAN Isoform 2 of Annexin A2
P07384	CAPN1	10.2658	ü		ü	ü	ü		ü				CAN1_HUMAN Calpain-1 catalytic subunit
P07602-3	PSAP	10.4547	ü		ü	ü			ü				SAP_HUMAN Isoform Sap-mu-9 of Prosaposin
P07686	HEXB	18.8151	ü						ü				HEXB_HUMAN Beta-hexosaminidase subunit beta
P07737	PFN1	9.38334	ü				ü	ü		ü			PROF1_HUMAN Profilin-1
P07814	EPRS	7.7317			ü		ü						SYEP_HUMAN Bifunctional glutamate/proline--tRNA ligase
P07858	CTSB	26.3855	ü			ü			ü	ü			CATB_HUMAN Cathepsin B
P07900-2	HSP90AA1	10.7565	ü		ü		ü		ü	ü			HS90A_HUMAN Isoform 2 of Heat shock protein HSP 90-alpha
P07910	HNRNPC	7.45881	ü				ü			ü			HNRPC_HUMAN Heterogeneous nuclear ribonucleoproteins C1/C2
P07954	FH	5.2187	ü			ü	ü						FUMH_HUMAN Fumarate hydratase, mitochondrial
P08047	SP1	11.4912								ü			SP1_HUMAN Transcription factor Sp1
P08107	HSPA1A	9.28529				ü	ü	ü		ü			HSP71_HUMAN Heat shock 70 kDa protein 1A/1B
P08134	RHOC	14.3124	ü		ü		ü			ü			RHOC_HUMAN Rho-related GTP-binding protein RhoC
P08195-4	SLC3A2	8.89563	ü		ü					ü			4F2_HUMAN Isoform 4 of 4F2 cell-surface antigen heavy chain
P08236	GUSB	2.59285	ü		ü				ü				BGLR_HUMAN Beta-glucuronidase
P08237-3	PFKM	6.57697	ü		ü		ü						K6PF_HUMAN Isoform 3 of 6-phosphofructokinase, muscle type
P08238	HSP90AB1	7.83306	ü		ü	ü	ü		ü	ü			HS90B_HUMAN Heat shock protein HSP 90-beta
P08240	SRPR	12.5889	ü										SRPR_HUMAN Signal recognition particle receptor subunit alpha
P08243	ASNS	9.6217					ü						ASNS_HUMAN Asparagine synthetase [glutamine-hydrolyzing]
P08397	HMBS	4.5704					ü						HEM3_HUMAN Porphobilinogen deaminase
P08559-4	PDHA1	5.38325				ü				ü			ODPA_HUMAN Isoform 4 of Pyruvate dehydrogenase E1 component subunit alpha, somatic form, mitochondrial
P08574	CYC1	9.45631				ü				ü			CY1_HUMAN Cytochrome c1, heme protein, mitochondrial
P08579	SNRPB2	4.51033								ü			RU2B_HUMAN U2 small nuclear ribonucleoprotein B''
P08621	SNRNP70	11.0198								ü			RU17_HUMAN U1 small nuclear ribonucleoprotein 70 kDa
P08651	NFIC	8.66217								ü			NFIC_HUMAN Nuclear factor 1 C-type
P08670	VIM	5.7556	ü		ü		ü	ü					VIME_HUMAN Vimentin
P08754	GNAI3	8.16716	ü	ü	ü			ü	ü				GNAI3_HUMAN Guanine nucleotide-binding protein G(k) subunit alpha
P08758	ANXA5	15.7856	ü		ü								ANXA5_HUMAN Annexin A5
P08865	RPSA	9.03712	ü		ü		ü			ü		ü	RSSA_HUMAN 40S ribosomal protein SA
P08962	CD63	8.54893	ü		ü				ü				CD63_HUMAN CD63 antigen
P09001	MRPL3	5.64222				ü						ü	RM03_HUMAN 39S ribosomal protein L3, mitochondrial
P09012	SNRPA	10.4453								ü			SNRPA_HUMAN U1 small nuclear ribonucleoprotein A
P09110	ACAA1	13.9691											THIK_HUMAN 3-ketoacyl-CoA thiolase, peroxisomal
P09132	SRP19	14.4195				ü	ü			ü			SRP19_HUMAN Signal recognition particle 19 kDa protein
P09234	SNRPC	13.6393								ü			RU1C_HUMAN U1 small nuclear ribonucleoprotein C
P09382	LGALS1	13.0462	ü		ü					ü			LEG1_HUMAN Galectin-1
P09429	HMGB1	27.3323			ü					ü			HMGB1_HUMAN High mobility group protein B1
P09467	FBP1	11.8751	ü				ü						F16P1_HUMAN Fructose-1,6-bisphosphatase 1
P09493-8	TPM1	13.294					ü	ü					TPM1_HUMAN Isoform 8 of Tropomyosin alpha-1 chain
P09493-9	TPM1	8.6352					ü	ü					TPM1_HUMAN Isoform 9 of Tropomyosin alpha-1 chain
P09496	CLTA	11.0726		ü	ü		ü	ü	ü				CLCA_HUMAN Clathrin light chain A
P09525	ANXA4	10.6116	ü		ü					ü			ANXA4_HUMAN Annexin A4
P09543	CNP	9.90069	ü		ü	ü		ü		ü			CN37_HUMAN 2',3'-cyclic-nucleotide 3'-phosphodiesterase
P09622	DLD	7.03417				ü				ü			DLDH_HUMAN Dihydrolipoyl dehydrogenase, mitochondrial
P09651	HNRNPA1	10.3873	ü							ü			ROA1_HUMAN Heterogeneous nuclear ribonucleoprotein A1
P09661	SNRPA1	6.98455								ü			RU2A_HUMAN U2 small nuclear ribonucleoprotein A'
P09669	COX6C	1.38541				ü							COX6C_HUMAN Cytochrome c oxidase subunit 6C
P09874	PARP1	21.6473				ü				ü			PARP1_HUMAN Poly [ADP-ribose] polymerase 1
P09914	IFIT1	7.95258					ü						IFIT1_HUMAN Interferon-induced protein with tetratricopeptide repeats 1
P09960	LTA4H	22.1241	ü				ü			ü			LKHA4_HUMAN Leukotriene A-4 hydrolase
P0C7X2	ZNF688	10.4673								ü			ZN688_HUMAN Zinc finger protein 688
P0CG08	GPR89B	10.5953		ü									GPHRB_HUMAN Golgi pH regulator B
P0CG48	UBC	5.9909	ü		ü		ü		ü	ü			UBC_HUMAN Polyubiquitin-C
P0CW22	RPS17L	5.97077	ü				ü			ü		ü	RS17L_HUMAN 40S ribosomal protein S17-like
P10155	TROVE2	6.01586								ü			RO60_HUMAN 60 kDa SS-A/Ro ribonucleoprotein
P10244	MYBL2	6.25471								ü			MYBB_HUMAN Myb-related protein B
P10316	HLA-A	7.54323	ü	ü	ü								1A69_HUMAN HLA class I histocompatibility antigen, A-69 alpha chain
P10599	TXN	11.3408	ü			ü	ü			ü			THIO_HUMAN Thioredoxin
P10606	COX5B	4.20778	ü			ü							COX5B_HUMAN Cytochrome c oxidase subunit 5B, mitochondrial
P10619	CTSA	5.27831	ü						ü	ü			PPGB_HUMAN Lysosomal protective protein
P10620	MGST1	15.2106			ü	ü				ü			MGST1_HUMAN Microsomal glutathione S-transferase 1
P10644	PRKAR1A	5.71291			ü		ü						KAP0_HUMAN cAMP-dependent protein kinase type I-alpha regulatory subunit
P10768	ESD	14.5926	ü										ESTD_HUMAN S-formylglutathione hydrolase
P10809	HSPD1	12.6027	ü	ü	ü	ü	ü			ü			CH60_HUMAN 60 kDa heat shock protein, mitochondrial
P10909-2	CLU	4.0445	ü	ü	ü	ü	ü			ü			CLUS_HUMAN Isoform 2 of Clusterin
P11021	HSPA5	25.6816	ü		ü	ü				ü			GRP78_HUMAN 78 kDa glucose-regulated protein
P11142	HSPA8	9.51864	ü		ü		ü		ü	ü			HSP7C_HUMAN Heat shock cognate 71 kDa protein
P11172	UMPS	11.5737					ü			ü			UMPS_HUMAN Uridine 5'-monophosphate synthase
P11177	PDHB	7.89461	ü			ü				ü			ODPB_HUMAN Pyruvate dehydrogenase E1 component subunit beta, mitochondrial
P11182	DBT	7.00644				ü							ODB2_HUMAN Lipoamide acyltransferase component of branched-chain alpha-keto acid dehydrogenase complex, mitochondrial
P11233	RALA	11.4324	ü		ü								RALA_HUMAN Ras-related protein Ral-A
P11234	RALB	13.3016	ü		ü								RALB_HUMAN Ras-related protein Ral-B
P11387	TOP1	11.1403								ü			TOP1_HUMAN DNA topoisomerase 1
P11388-4	TOP2A	6.22606						ü		ü			TOP2A_HUMAN Isoform 4 of DNA topoisomerase 2-alpha
P11413-2	G6PD	8.80634	ü		ü		ü	ü		ü			G6PD_HUMAN Isoform Long of Glucose-6-phosphate 1-dehydrogenase
P11474	ESRRA	5.98056						ü		ü			ERR1_HUMAN Steroid hormone receptor ERR1
P11586	MTHFD1	11.1349	ü			ü	ü						C1TC_HUMAN C-1-tetrahydrofolate synthase, cytoplasmic
P11908-2	PRPS2	6.8963	ü										PRPS2_HUMAN Isoform 2 of Ribose-phosphate pyrophosphokinase 2
P11940	PABPC1	6.97893	ü				ü			ü			PABP1_HUMAN Polyadenylate-binding protein 1
P12004	PCNA	19.2434	ü					ü		ü			PCNA_HUMAN Proliferating cell nuclear antigen
P12081	HARS	11.216				ü	ü						SYHC_HUMAN Histidine--tRNA ligase, cytoplasmic
P12235	SLC25A4	4.81653			ü	ü				ü			ADT1_HUMAN ADP/ATP translocase 1
P12236	SLC25A6	17.5258				ü				ü			ADT3_HUMAN ADP/ATP translocase 3
P12268	IMPDH2	8.87853	ü				ü			ü			IMDH2_HUMAN Inosine-5'-monophosphate dehydrogenase 2
P12270	TPR	2.94881						ü		ü			TPR_HUMAN Nucleoprotein TPR
P12814-4	ACTN1	13.3093	ü		ü		ü	ü					ACTN1_HUMAN Isoform 4 of Alpha-actinin-1
P12956	XRCC6	12.7323					ü			ü			XRCC6_HUMAN X-ray repair cross-complementing protein 6
P13010	XRCC5	6.60266			ü		ü			ü			XRCC5_HUMAN X-ray repair cross-complementing protein 5
P13051	UNG	6.97472				ü				ü			UNG_HUMAN Uracil-DNA glycosylase
P13073	COX4I1	5.07428	ü			ü				ü			COX41_HUMAN Cytochrome c oxidase subunit 4 isoform 1, mitochondrial
P13498	CYBA	2.43517		ü	ü	ü		ü		ü			CY24A_HUMAN Cytochrome b-245 light chain
P13639	EEF2	5.58539	ü		ü		ü			ü		ü	EF2_HUMAN Elongation factor 2
P13640	MT1G	12.4398								ü			MT1G_HUMAN Metallothionein-1G
P13667	PDIA4	21.473											PDIA4_HUMAN Protein disulfide-isomerase A4
P13674	P4HA1	11.3333				ü							P4HA1_HUMAN Prolyl 4-hydroxylase subunit alpha-1
P13693	TPT1	5.24277	ü					ü		ü			TCTP_HUMAN Translationally-controlled tumor protein
P13798	APEH	4.84244	ü				ü			ü			ACPH_HUMAN Acylamino-acid-releasing enzyme
P13804	ETFA	17.2768	ü			ü							ETFA_HUMAN Electron transfer flavoprotein subunit alpha, mitochondrial
P13929	ENO3	14.8936	ü		ü		ü						ENOB_HUMAN Beta-enolase
P13984	GTF2F2	10.8951						ü		ü			T2FB_HUMAN General transcription factor IIF subunit 2
P13995	MTHFD2	5.6727				ü	ü						MTDC_HUMAN Bifunctional methylenetetrahydrofolate dehydrogenase/cyclohydrolase, mitochondrial
P14174	MIF	14.0541	ü							ü			MIF_HUMAN Macrophage migration inhibitory factor
P14314	PRKCSH	11.9922			ü								GLU2B_HUMAN Glucosidase 2 subunit beta
P14324	FDPS	9.38715			ü	ü	ü			ü			FPPS_HUMAN Farnesyl pyrophosphate synthase
P14406	COX7A2	5.75943	ü			ü							CX7A2_HUMAN Cytochrome c oxidase subunit 7A2, mitochondrial
P14550	AKR1A1	11.5294	ü		ü		ü						AK1A1_HUMAN Alcohol dehydrogenase [NADP(+)]
P14618	PKM	17.5258	ü			ü	ü			ü			KPYM_HUMAN Pyruvate kinase PKM
P14618-2	PKM	10.9467	ü			ü	ü			ü			KPYM_HUMAN Isoform M1 of Pyruvate kinase PKM
P14625	HSP90B1	11.9426	ü		ü		ü			ü			ENPL_HUMAN Endoplasmin
P14635	CCNB1	3.28646					ü	ü		ü			CCNB1_HUMAN G2/mitotic-specific cyclin-B1
P14678-3	SNRPB	6.11241	ü				ü			ü			RSMB_HUMAN Isoform SM-B1 of Small nuclear ribonucleoprotein-associated proteins B and B'
P14866	HNRNPL	9.32652	ü							ü			HNRPL_HUMAN Heterogeneous nuclear ribonucleoprotein L
P14868	DARS	7.51053	ü				ü						SYDC_HUMAN Aspartate--tRNA ligase, cytoplasmic
P14927-2	UQCRB	4.70345				ü							QCR7_HUMAN Isoform 2 of Cytochrome b-c1 complex subunit 7
P15170-3	GSPT1	10.0065					ü						ERF3A_HUMAN Isoform 3 of Eukaryotic peptide chain release factor GTP-binding subunit ERF3A
P15291	B4GALT1	6.65847	ü	ü	ü								B4GT1_HUMAN Beta-1,4-galactosyltransferase 1
P15311	EZR	15.0162	ü		ü		ü	ü		ü			EZRI_HUMAN Ezrin
P15408	FOSL2	3.3262								ü			FOSL2_HUMAN Fos-related antigen 2
P15514	AREG	2.21743		ü						ü			AREG_HUMAN Amphiregulin
P15559	NQO1	4.53008	ü				ü						NQO1_HUMAN NAD(P)H dehydrogenase [quinone] 1
P15586	GNS	4.28662	ü						ü				GNS_HUMAN N-acetylglucosamine-6-sulfatase
P15880	RPS2	5.29767	ü				ü			ü		ü	RS2_HUMAN 40S ribosomal protein S2
P15927-3	RPA2	20.8779								ü			RFA2_HUMAN Isoform 3 of Replication protein A 32 kDa subunit
P16152	CBR1	12.7981	ü				ü						CBR1_HUMAN Carbonyl reductase [NADPH] 1
P16401	HIST1H1B	24.1179	ü							ü			H15_HUMAN Histone H1.5
P16402	HIST1H1D	20.0274								ü			H13_HUMAN Histone H1.3
P16403	HIST1H1C	16.7751								ü			H12_HUMAN Histone H1.2
P16435	POR	11.8487				ü							NCPR_HUMAN NADPH--cytochrome P450 reductase
P16455	MGMT	11.5969								ü			MGMT_HUMAN Methylated-DNA--protein-cysteine methyltransferase
P16615	ATP2A2	8.74965			ü								AT2A2_HUMAN Sarcoplasmic/endoplasmic reticulum calcium ATPase 2
P16989	YBX3	9.46793								ü			YBOX3_HUMAN Y-box-binding protein 3
P17010	ZFX	10.7548								ü			ZFX_HUMAN Zinc finger X-chromosomal protein
P17029	ZKSCAN1	5.99764								ü			ZKSC1_HUMAN Zinc finger protein with KRAB and SCAN domains 1
P17252	PRKCA	12.9246	ü		ü	ü	ü			ü			KPCA_HUMAN Protein kinase C alpha type
P17275	JUNB	2.12147								ü			JUNB_HUMAN Transcription factor jun-B
P17480	UBTF	11.2927								ü			UBF1_HUMAN Nucleolar transcription factor 1
P17568	NDUFB7	2.45971				ü							NDUB7_HUMAN NADH dehydrogenase [ubiquinone] 1 beta subcomplex subunit 7
P17612	PRKACA	9.21738	ü		ü	ü	ü	ü		ü			KAPCA_HUMAN cAMP-dependent protein kinase catalytic subunit alpha
P17676	CEBPB	5.13709								ü			CEBPB_HUMAN CCAAT/enhancer-binding protein beta
P17706	PTPN2	13.3272			ü					ü			PTN2_HUMAN Tyrosine-protein phosphatase non-receptor type 2
P17812	CTPS1	20.9094					ü						PYRG1_HUMAN CTP synthase 1
P17844	DDX5	10.1724	ü							ü			DDX5_HUMAN Probable ATP-dependent RNA helicase DDX5
P17858-2	PFKL	5.8627	ü				ü						K6PL_HUMAN Isoform 2 of 6-phosphofructokinase, liver type
P17931	LGALS3	12.1349	ü		ü	ü				ü			LEG3_HUMAN Galectin-3
P17980	PSMC3	4.01429					ü			ü	ü		PRS6A_HUMAN 26S protease regulatory subunit 6A
P17987	TCP1	23.2055	ü	ü			ü	ü		ü			TCPA_HUMAN T-complex protein 1 subunit alpha
P18031	PTPN1	13.1253					ü						PTN1_HUMAN Tyrosine-protein phosphatase non-receptor type 1
P18065	IGFBP2	0.708595	ü		ü								IBP2_HUMAN Insulin-like growth factor-binding protein 2
P18077	RPL35A	7.66332	ü			ü	ü					ü	RL35A_HUMAN 60S ribosomal protein L35a
P18084	ITGB5	7.72051	ü		ü								ITB5_HUMAN Integrin beta-5
P18124	RPL7	12.9126	ü				ü			ü		ü	RL7_HUMAN 60S ribosomal protein L7
P18146	EGR1	1.93882								ü			EGR1_HUMAN Early growth response protein 1
P18206	VCL	13.4959	ü		ü		ü	ü					VINC_HUMAN Vinculin
P18583-9	SON	12.1264								ü			SON_HUMAN Isoform I of Protein SON
P18615	NELFE	14.0998			ü					ü			NELFE_HUMAN Negative elongation factor E
P18621-3	RPL17	7.28555					ü			ü		ü	RL17_HUMAN Isoform 3 of 60S ribosomal protein L17
P18669	PGAM1	16.8649	ü				ü						PGAM1_HUMAN Phosphoglycerate mutase 1
P18827	SDC1	5.01554	ü	ü	ü				ü				SDC1_HUMAN Syndecan-1
P18858	LIG1	14.037		ü		ü				ü			DNLI1_HUMAN DNA ligase 1
P19338	NCL	10.8491	ü							ü			NUCL_HUMAN Nucleolin
P19367-3	HK1	14.4165				ü	ü						HXK1_HUMAN Isoform 3 of Hexokinase-1
P19404	NDUFV2	4.26054				ü							NDUV2_HUMAN NADH dehydrogenase [ubiquinone] flavoprotein 2, mitochondrial
P19419	ELK1	4.58249				ü				ü			ELK1_HUMAN ETS domain-containing protein Elk-1
P19447	ERCC3	4.15955								ü			ERCC3_HUMAN TFIIH basal transcription factor complex helicase XPB subunit
P19525	EIF2AK2	12.4131					ü			ü		ü	E2AK2_HUMAN Interferon-induced, double-stranded RNA-activated protein kinase
P19784	CSNK2A2	14.4737			ü		ü			ü			CSK22_HUMAN Casein kinase II subunit alpha'
P19838-2	NFKB1	10.2461				ü	ü			ü			NFKB1_HUMAN Isoform 2 of Nuclear factor NF-kappa-B p105 subunit
P20042	EIF2S2	12.6487					ü			ü			IF2B_HUMAN Eukaryotic translation initiation factor 2 subunit 2
P20290	BTF3	7.84369								ü			BTF3_HUMAN Transcription factor BTF3
P20339	RAB5A	12.573	ü		ü		ü	ü					RAB5A_HUMAN Ras-related protein Rab-5A
P20340-2	RAB6A	12.1222	ü	ü	ü		ü						RAB6A_HUMAN Isoform 2 of Ras-related protein Rab-6A
P20618	PSMB1	0.965386	ü				ü			ü	ü		PSB1_HUMAN Proteasome subunit beta type-1
P20671	HIST1H2AD	15.7641	ü							ü			H2A1D_HUMAN Histone H2A type 1-D
P20674	COX5A	8.61373	ü			ü							COX5A_HUMAN Cytochrome c oxidase subunit 5A, mitochondrial
P20700	LMNB1	8.48198						ü		ü			LMNB1_HUMAN Lamin-B1
P20839-6	IMPDH1	10.4248					ü			ü			IMDH1_HUMAN Isoform 6 of Inosine-5'-monophosphate dehydrogenase 1
P21127	CDK11B	6.94258								ü			CD11B_HUMAN Cyclin-dependent kinase 11B
P21266	GSTM3	15.1375	ü				ü			ü			GSTM3_HUMAN Glutathione S-transferase Mu 3
P21283	ATP6V1C1	8.90706	ü		ü		ü		ü				VATC1_HUMAN V-type proton ATPase subunit C 1
P21291	CSRP1	19.6805	ü							ü			CSRP1_HUMAN Cysteine and glycine-rich protein 1
P21333	FLNA	12.9973	ü		ü		ü	ü		ü			FLNA_HUMAN Filamin-A
P21399	ACO1	13.1054	ü	ü		ü	ü						ACOC_HUMAN Cytoplasmic aconitate hydratase
P21580	TNFAIP3	4.25975	ü				ü		ü	ü			TNAP3_HUMAN Tumor necrosis factor alpha-induced protein 3
P21741	MDK	0.491545											MK_HUMAN Midkine
P21796	VDAC1	19.2327	ü		ü	ü				ü			VDAC1_HUMAN Voltage-dependent anion-selective channel protein 1
P21860	ERBB3	4.19479			ü								ERBB3_HUMAN Receptor tyrosine-protein kinase erbB-3
P21912	SDHB	9.01245	ü		ü	ü				ü			DHSB_HUMAN Succinate dehydrogenase [ubiquinone] iron-sulfur subunit, mitochondrial
P21926	CD9	14.4647	ü		ü								CD9_HUMAN CD9 antigen
P22033	MUT	6.60392				ü							MUTA_HUMAN Methylmalonyl-CoA mutase, mitochondrial
P22059	OSBP	9.2395		ü	ü		ü			ü			OSBP1_HUMAN Oxysterol-binding protein 1
P22061-2	PCMT1	10.2234	ü				ü						PIMT_HUMAN Isoform 2 of Protein-L-isoaspartate(D-aspartate) O-methyltransferase
P22087	FBL	12.6096	ü							ü			FBRL_HUMAN rRNA 2'-O-methyltransferase fibrillarin
P22234-2	PAICS	11.6222	ü				ü						PUR6_HUMAN Isoform 2 of Multifunctional protein ADE2
P22307	SCP2	27.2356	ü		ü	ü				ü			NLTP_HUMAN Non-specific lipid-transfer protein
P22314	UBA1	14.4496	ü			ü	ü		ü	ü			UBA1_HUMAN Ubiquitin-like modifier-activating enzyme 1
P22392-2	NME2	13.8991	ü			ü	ü	ü		ü			NDKB_HUMAN Isoform 3 of Nucleoside diphosphate kinase B
P22570-3	FDXR	19.6248				ü							ADRO_HUMAN Isoform 3 of NADPH:adrenodoxin oxidoreductase, mitochondrial
P22626	HNRNPA2B1	13.955	ü							ü			ROA2_HUMAN Heterogeneous nuclear ribonucleoproteins A2/B1
P22694-2	PRKACB	11.3855	ü		ü		ü	ü		ü			KAPCB_HUMAN Isoform 2 of cAMP-dependent protein kinase catalytic subunit beta
P22695	UQCRC2	10.672	ü			ü				ü			QCR2_HUMAN Cytochrome b-c1 complex subunit 2, mitochondrial
P22830-2	FECH	8.36629			ü	ü							HEMH_HUMAN Isoform 2 of Ferrochelatase, mitochondrial
P23193	TCEA1	9.48477								ü			TCEA1_HUMAN Transcription elongation factor A protein 1
P23246	SFPQ	8.79963								ü			SFPQ_HUMAN Splicing factor, proline- and glutamine-rich
P23284	PPIB	8.78291	ü							ü			PPIB_HUMAN Peptidyl-prolyl cis-trans isomerase B
P23381	WARS	9.97621	ü				ü			ü			SYWC_HUMAN Tryptophan--tRNA ligase, cytoplasmic
P23396-2	RPS3	5.73607	ü		ü	ü	ü	ü		ü		ü	RS3_HUMAN Isoform 2 of 40S ribosomal protein S3
P23443	RPS6KB1	7.44359				ü	ü			ü			KS6B1_HUMAN Ribosomal protein S6 kinase beta-1
P23458	JAK1	1.7672					ü	ü		ü			JAK1_HUMAN Tyrosine-protein kinase JAK1
P23470	PTPRG	29.7744	ü		ü								PTPRG_HUMAN Receptor-type tyrosine-protein phosphatase gamma
P23497	SP100	10.7332								ü			SP100_HUMAN Nuclear autoantigen Sp-100
P23526	AHCY	8.56266	ü				ü			ü			SAHH_HUMAN Adenosylhomocysteinase
P23528	CFL1	10.1784	ü		ü			ü		ü			COF1_HUMAN Cofilin-1
P23588	EIF4B	9.35548					ü						IF4B_HUMAN Eukaryotic translation initiation factor 4B
P23763	VAMP1	17.7776			ü	ü	ü		ü				VAMP1_HUMAN Vesicle-associated membrane protein 1
P23771-2	GATA3	6.45509								ü			GATA3_HUMAN Isoform 2 of Trans-acting T-cell-specific transcription factor GATA-3
P23786	CPT2	14.7919				ü				ü			CPT2_HUMAN Carnitine O-palmitoyltransferase 2, mitochondrial
P23919	DTYMK	13.012				ü	ü			ü			KTHY_HUMAN Thymidylate kinase
P23921	RRM1	5.67549	ü				ü			ü			RIR1_HUMAN Ribonucleoside-diphosphate reductase large subunit
P24390	KDELR1	18.4201		ü									ERD21_HUMAN ER lumen protein retaining receptor 1
P24468	NR2F2	6.41744								ü			COT2_HUMAN COUP transcription factor 2
P24534	EEF1B2	12.3776					ü			ü			EF1B_HUMAN Elongation factor 1-beta
P24539	ATP5F1	11.0497	ü			ü				ü			AT5F1_HUMAN ATP synthase F(0) complex subunit B1, mitochondrial
P24666	ACP1	14.0712	ü		ü								PPAC_HUMAN Low molecular weight phosphotyrosine protein phosphatase
P24752	ACAT1	9.46793	ü			ü							THIL_HUMAN Acetyl-CoA acetyltransferase, mitochondrial
P24941	CDK2	11.6144					ü	ü		ü			CDK2_HUMAN Cyclin-dependent kinase 2
P25205	MCM3	10.5038						ü		ü			MCM3_HUMAN DNA replication licensing factor MCM3
P25398	RPS12	12.2356					ü			ü		ü	RS12_HUMAN 40S ribosomal protein S12
P25440-2	BRD2	4.11754								ü			BRD2_HUMAN Isoform 2 of Bromodomain-containing protein 2
P25490	YY1	10.6474								ü			TYY1_HUMAN Transcriptional repressor protein YY1
P25685	DNAJB1	8.02625	ü				ü			ü			DNJB1_HUMAN DnaJ homolog subfamily B member 1
P25705	ATP5A1	10.1829	ü		ü	ü				ü			ATPA_HUMAN ATP synthase subunit alpha, mitochondrial
P25786-2	PSMA1	1.99846	ü				ü	ü		ü	ü		PSA1_HUMAN Isoform Long of Proteasome subunit alpha type-1
P25788	PSMA3	1.70445	ü				ü			ü	ü		PSA3_HUMAN Proteasome subunit alpha type-3
P25789	PSMA4	1.97018	ü				ü			ü	ü		PSA4_HUMAN Proteasome subunit alpha type-4
P26196	DDX6	10.234				ü	ü	ü		ü			DDX6_HUMAN Probable ATP-dependent RNA helicase DDX6
P26232	CTNNA2	6.67193			ü		ü	ü		ü			CTNA2_HUMAN Catenin alpha-2
P26358-2	DNMT1	20.0854								ü			DNMT1_HUMAN Isoform 2 of DNA (cytosine-5)-methyltransferase 1
P26368	U2AF2	12.5525								ü			U2AF2_HUMAN Splicing factor U2AF 65 kDa subunit
P26373	RPL13	5.5474					ü			ü		ü	RL13_HUMAN 60S ribosomal protein L13
P26440	IVD	5.09854				ü				ü			IVD_HUMAN Isovaleryl-CoA dehydrogenase, mitochondrial
P26583	HMGB2	17.6328								ü			HMGB2_HUMAN High mobility group protein B2
P26599-3	PTBP1	12.6487	ü							ü			PTBP1_HUMAN Isoform 3 of Polypyrimidine tract-binding protein 1
P26640	VARS	14.3153				ü	ü						SYVC_HUMAN Valine--tRNA ligase
P26641	EEF1G	13.986	ü				ü			ü			EF1G_HUMAN Elongation factor 1-gamma
P26885	FKBP2	24.0176	ü										FKBP2_HUMAN Peptidyl-prolyl cis-trans isomerase FKBP2
P27105	STOM	11.44	ü		ü	ü		ü					STOM_HUMAN Erythrocyte band 7 integral membrane protein
P27144	AK4	17.5926	ü			ü							KAD4_HUMAN Adenylate kinase 4, mitochondrial
P27348	YWHAQ	13.6769	ü		ü	ü	ü						1433T_HUMAN 14-3-3 protein theta
P27361	MAPK3	10.0587	ü	ü	ü	ü	ü	ü		ü			MK03_HUMAN Mitogen-activated protein kinase 3
P27448-7	MARK3	7.39436	ü		ü		ü						MARK3_HUMAN Isoform 6 of MAP/microtubule affinity-regulating kinase 3
P27635	RPL10	5.44542					ü					ü	RL10_HUMAN 60S ribosomal protein L10
P27694	RPA1	12.0778								ü			RFA1_HUMAN Replication protein A 70 kDa DNA-binding subunit
P27695	APEX1	17.8738				ü		ü		ü		ü	APEX1_HUMAN DNA-(apurinic or apyrimidinic site) lyase
P27797	CALR	15.417	ü	ü	ü		ü			ü			CALR_HUMAN Calreticulin
P27816	MAP4	11.5563	ü		ü			ü					MAP4_HUMAN Microtubule-associated protein 4
P27824	CANX	15.3623	ü									ü	CALX_HUMAN Calnexin
P27986-4	PIK3R1	5.02426			ü		ü			ü			P85A_HUMAN Isoform 4 of Phosphatidylinositol 3-kinase regulatory subunit alpha
P28288	ABCD3	16.9308			ü	ü	ü						ABCD3_HUMAN ATP-binding cassette sub-family D member 3
P28331-2	NDUFS1	3.60676			ü	ü							NDUS1_HUMAN Isoform 2 of NADH-ubiquinone oxidoreductase 75 kDa subunit, mitochondrial
P28482	MAPK1	9.74205	ü	ü	ü	ü	ü	ü		ü			MK01_HUMAN Mitogen-activated protein kinase 1
P28676	GCA	6.4611	ü		ü								GRAN_HUMAN Grancalcin
P28702-3	RXRB	8.53945								ü		ü	RXRB_HUMAN Isoform 2 of Retinoic acid receptor RXR-beta
P28838	LAP3	9.28405	ü	ü		ü				ü			AMPL_HUMAN Cytosol aminopeptidase
P29083	GTF2E1	11.7363								ü			T2EA_HUMAN General transcription factor IIE subunit 1
P29084	GTF2E2	13.4435								ü			T2EB_HUMAN Transcription initiation factor IIE subunit beta
P29144	TPP2	10.9364					ü			ü			TPP2_HUMAN Tripeptidyl-peptidase 2
P29317	EPHA2	5.81548			ü								EPHA2_HUMAN Ephrin type-A receptor 2
P29350-4	PTPN6	12.7253	ü				ü			ü			PTN6_HUMAN Isoform 4 of Tyrosine-protein phosphatase non-receptor type 6
P29372	MPG	7.1695				ü				ü			3MG_HUMAN DNA-3-methyladenine glycosylase
P29373	CRABP2	11.3649	ü				ü			ü			RABP2_HUMAN Cellular retinoic acid-binding protein 2
P29401-2	TKT	4.78197	ü				ü			ü			TKT_HUMAN Isoform 2 of Transketolase
P29692-2	EEF1D	11.2946					ü			ü			EF1D_HUMAN Isoform 2 of Elongation factor 1-delta
P29992	GNA11	10.5022	ü		ü				ü				GNA11_HUMAN Guanine nucleotide-binding protein subunit alpha-11
P30038	ALDH4A1	13.103				ü							AL4A1_HUMAN Delta-1-pyrroline-5-carboxylate dehydrogenase, mitochondrial
P30040	ERP29	12.6811	ü										ERP29_HUMAN Endoplasmic reticulum resident protein 29
P30041	PRDX6	10.6181	ü		ü		ü		ü				PRDX6_HUMAN Peroxiredoxin-6
P30042	C21orf33	17.7639				ü							ES1_HUMAN ES1 protein homolog, mitochondrial
P30043	BLVRB	8.73421	ü		ü		ü			ü			BLVRB_HUMAN Flavin reductase (NADPH)
P30044	PRDX5	26.068	ü			ü	ü			ü			PRDX5_HUMAN Peroxiredoxin-5, mitochondrial
P30048	PRDX3	18.131	ü			ü	ü						PRDX3_HUMAN Thioredoxin-dependent peroxide reductase, mitochondrial
P30050	RPL12	3.01526	ü				ü			ü		ü	RL12_HUMAN 60S ribosomal protein L12
P30084	ECHS1	5.66436	ü			ü							ECHM_HUMAN Enoyl-CoA hydratase, mitochondrial
P30085	CMPK1	16.7306	ü				ü			ü			KCY_HUMAN UMP-CMP kinase
P30086	PEBP1	132.028	ü				ü			ü			PEBP1_HUMAN Phosphatidylethanolamine-binding protein 1
P30101	PDIA3	14.1257	ü							ü			PDIA3_HUMAN Protein disulfide-isomerase A3
P30153	PPP2R1A	6.57385	ü		ü	ü	ü	ü		ü			2AAA_HUMAN Serine/threonine-protein phosphatase 2A 65 kDa regulatory subunit A alpha isoform
P30405	PPIF	15.3216				ü							PPIF_HUMAN Peptidyl-prolyl cis-trans isomerase F, mitochondrial
P30419	NMT1	14.5803			ü	ü	ü	ü					NMT1_HUMAN Glycylpeptide N-tetradecanoyltransferase 1
P30519	HMOX2	12.3095			ü								HMOX2_HUMAN Heme oxygenase 2
P30520	ADSS	17.6328	ü		ü		ü						PURA2_HUMAN Adenylosuccinate synthetase isozyme 2
P30613	PKLR	10.2552	ü				ü						KPYR_HUMAN Pyruvate kinase PKLR
P30626	SRI	11.0886	ü			ü	ü			ü			SORCN_HUMAN Sorcin
P30740	SERPINB1	14.7228	ü										ILEU_HUMAN Leukocyte elastase inhibitor
P31146	CORO1A	6.10004	ü		ü		ü	ü		ü			COR1A_HUMAN Coronin-1A
P31150	GDI1	22.2163		ü			ü						GDIA_HUMAN Rab GDP dissociation inhibitor alpha
P31153	MAT2A	7.1547					ü						METK2_HUMAN S-adenosylmethionine synthase isoform type-2
P31350-2	RRM2	3.82489					ü			ü			RIR2_HUMAN Isoform 2 of Ribonucleoside-diphosphate reductase subunit M2
P31431	SDC4	4.70249	ü	ü	ü				ü				SDC4_HUMAN Syndecan-4
P31483	TIA1	7.66841								ü			TIA1_HUMAN Nucleolysin TIA-1 isoform p40
P31641	SLC6A6	3.62051			ü								SC6A6_HUMAN Sodium- and chloride-dependent taurine transporter
P31689	DNAJA1	5.14701	ü			ü	ü			ü			DNJA1_HUMAN DnaJ homolog subfamily A member 1
P31749	AKT1	10.9105			ü	ü	ü	ü		ü			AKT1_HUMAN RAC-alpha serine/threonine-protein kinase
P31751	AKT2	10.7182			ü		ü			ü			AKT2_HUMAN RAC-beta serine/threonine-protein kinase
P31930	UQCRC1	20.8277				ü							QCR1_HUMAN Cytochrome b-c1 complex subunit 1, mitochondrial
P31939	ATIC	10.1116	ü		ü	ü	ü						PUR9_HUMAN Bifunctional purine biosynthesis protein PURH
P31943	HNRNPH1	19.5804								ü			HNRH1_HUMAN Heterogeneous nuclear ribonucleoprotein H
P31946	YWHAB	13.0217	ü		ü	ü	ü			ü			1433B_HUMAN 14-3-3 protein beta/alpha
P31948	STIP1	12.6695		ü						ü			STIP1_HUMAN Stress-induced-phosphoprotein 1
P31949	S100A11	7.14806	ü							ü			S10AB_HUMAN Protein S100-A11
P32121-4	ARRB2	12.5935			ü		ü			ü			ARRB2_HUMAN Isoform 4 of Beta-arrestin-2
P32322	PYCR1	10.018				ü							P5CR1_HUMAN Pyrroline-5-carboxylate reductase 1, mitochondrial
P32519	ELF1	2.67728								ü			ELF1_HUMAN ETS-related transcription factor Elf-1
P32969	RPL9	7.43162					ü			ü		ü	RL9_HUMAN 60S ribosomal protein L9
P33121	ACSL1	10.5086			ü	ü							ACSL1_HUMAN Long-chain-fatty-acid--CoA ligase 1
P33176	KIF5B	11.8995			ü			ü					KINH_HUMAN Kinesin-1 heavy chain
P33316	DUT	16.3594	ü			ü				ü			DUT_HUMAN Deoxyuridine 5'-triphosphate nucleotidohydrolase, mitochondrial
P33552	CKS2	0.98492											CKS2_HUMAN Cyclin-dependent kinases regulatory subunit 2
P33947	KDELR2	19.3779	ü	ü									ERD22_HUMAN ER lumen protein retaining receptor 2
P33981	TTK	6.67965						ü					TTK_HUMAN Dual specificity protein kinase TTK
P33991	MCM4	7.94347								ü			MCM4_HUMAN DNA replication licensing factor MCM4
P33992	MCM5	12.2551								ü			MCM5_HUMAN DNA replication licensing factor MCM5
P33993	MCM7	3.30369					ü			ü			MCM7_HUMAN DNA replication licensing factor MCM7
P34897	SHMT2	14.4496	ü			ü		ü		ü			GLYM_HUMAN Serine hydroxymethyltransferase, mitochondrial
P35080-2	PFN2	6.00075	ü					ü					PROF2_HUMAN Isoform IIb of Profilin-2
P35221-2	CTNNA1	6.47317		ü	ü		ü	ü					CTNA1_HUMAN Isoform 2 of Catenin alpha-1
P35226	BMI1	9.76264								ü			BMI1_HUMAN Polycomb complex protein BMI-1
P35227	PCGF2	11.6125								ü			PCGF2_HUMAN Polycomb group RING finger protein 2
P35237	SERPINB6	14.6388	ü		ü		ü			ü			SPB6_HUMAN Serpin B6
P35240-2	NF2	11.9797			ü			ü		ü			MERL_HUMAN Isoform 2 of Merlin
P35241-5	RDX	17.6104	ü		ü			ü					RADI_HUMAN Isoform 5 of Radixin
P35249	RFC4	11.9901								ü			RFC4_HUMAN Replication factor C subunit 4
P35250	RFC2	5.9294								ü			RFC2_HUMAN Replication factor C subunit 2
P35251	RFC1	8.54155	ü							ü			RFC1_HUMAN Replication factor C subunit 1
P35268	RPL22	4.20752	ü				ü			ü		ü	RL22_HUMAN 60S ribosomal protein L22
P35269	GTF2F1	9.55275								ü			T2FA_HUMAN General transcription factor IIF subunit 1
P35270	SPR	12.0338	ü				ü			ü			SPRE_HUMAN Sepiapterin reductase
P35579	MYH9	7.14511	ü		ü		ü	ü		ü			MYH9_HUMAN Myosin-9
P35606	COPB2	11.0497		ü			ü						COPB2_HUMAN Coatomer subunit beta'
P35610	SOAT1	8.40382											SOAT1_HUMAN Sterol O-acyltransferase 1
P35611-3	ADD1	2.95409			ü		ü	ü		ü			ADDA_HUMAN Isoform 3 of Alpha-adducin
P35637	FUS	8.84568								ü			FUS_HUMAN RNA-binding protein FUS
P35658-5	NUP214	12.1583					ü			ü			NU214_HUMAN Isoform 5 of Nuclear pore complex protein Nup214
P35659	DEK	18.4593								ü			DEK_HUMAN Protein DEK
P35749-2	MYH11	5.32903	ü				ü	ü					MYH11_HUMAN Isoform 2 of Myosin-11
P35813-3	PPM1A	11.595			ü		ü			ü			PPM1A_HUMAN Isoform 3 of Protein phosphatase 1A
P35914	HMGCL	23.7298				ü							HMGCL_HUMAN Hydroxymethylglutaryl-CoA lyase, mitochondrial
P35998	PSMC2	6.41625					ü			ü	ü		PRS7_HUMAN 26S protease regulatory subunit 7
P36405	ARL3	13.0709	ü	ü				ü		ü			ARL3_HUMAN ADP-ribosylation factor-like protein 3
P36507	MAP2K2	9.10239		ü	ü	ü	ü	ü		ü			MP2K2_HUMAN Dual specificity mitogen-activated protein kinase kinase 2
P36542	ATP5C1	5.17776	ü			ü							ATPG_HUMAN ATP synthase subunit gamma, mitochondrial
P36543	ATP6V1E1	6.18771	ü		ü	ü	ü		ü				VATE1_HUMAN V-type proton ATPase subunit E 1
P36578	RPL4	6.82366	ü				ü			ü		ü	RL4_HUMAN 60S ribosomal protein L4
P36776	LONP1	11.8812				ü				ü			LONM_HUMAN Lon protease homolog, mitochondrial
P36957	DLST	15.3896	ü			ü				ü			ODO2_HUMAN Dihydrolipoyllysine-residue succinyltransferase component of 2-oxoglutarate dehydrogenase complex, mitochondrial
P36969	GPX4	12.8313	ü			ü	ü			ü			GPX4_HUMAN Phospholipid hydroperoxide glutathione peroxidase, mitochondrial
P37108	SRP14	7.19704	ü				ü			ü			SRP14_HUMAN Signal recognition particle 14 kDa protein
P37198	NUP62	8.0777			ü			ü		ü			NUP62_HUMAN Nuclear pore glycoprotein p62
P37268	FDFT1	4.3414			ü								FDFT_HUMAN Squalene synthase
P37802	TAGLN2	13.6959	ü										TAGL2_HUMAN Transgelin-2
P37837	TALDO1	17.1699	ü				ü			ü			TALDO_HUMAN Transaldolase
P38117-2	ETFB	8.16043	ü			ü							ETFB_HUMAN Isoform 2 of Electron transfer flavoprotein subunit beta
P38159	RBMX	20.0505	ü							ü			RBMX_HUMAN RNA-binding motif protein, X chromosome
P38646	HSPA9	10.9537	ü			ü				ü			GRP75_HUMAN Stress-70 protein, mitochondrial
P38919	EIF4A3	9.75851					ü			ü			IF4A3_HUMAN Eukaryotic initiation factor 4A-III
P39019	RPS19	8.88536	ü				ü			ü		ü	RS19_HUMAN 40S ribosomal protein S19
P39023	RPL3	3.38616	ü				ü			ü		ü	RL3_HUMAN 60S ribosomal protein L3
P39210	MPV17	13.9382				ü							MPV17_HUMAN Protein Mpv17
P39656	DDOST	7.04203			ü								OST48_HUMAN Dolichyl-diphosphooligosaccharide--protein glycosyltransferase 48 kDa subunit
P39748	FEN1	6.56079			ü	ü				ü			FEN1_HUMAN Flap endonuclease 1
P39880-3	CUX1	16.5311		ü			ü			ü			CUX1_HUMAN Isoform 3 of Homeobox protein cut-like 1
P40227	CCT6A	5.59351	ü				ü	ü					TCPZ_HUMAN T-complex protein 1 subunit zeta
P40424	PBX1	5.83801								ü			PBX1_HUMAN Pre-B-cell leukemia transcription factor 1
P40429	RPL13A	4.05444					ü			ü		ü	RL13A_HUMAN 60S ribosomal protein L13a
P40616	ARL1	12.1031	ü	ü			ü						ARL1_HUMAN ADP-ribosylation factor-like protein 1
P40763	STAT3	11.4836			ü	ü	ü			ü			STAT3_HUMAN Signal transducer and activator of transcription 3
P40818	USP8	12.2681		ü	ü		ü			ü			UBP8_HUMAN Ubiquitin carboxyl-terminal hydrolase 8
P40925-3	MDH1	16.0748	ü			ü	ü	ü					MDHC_HUMAN Isoform 3 of Malate dehydrogenase, cytoplasmic
P40926	MDH2	49.3695	ü			ü				ü			MDHM_HUMAN Malate dehydrogenase, mitochondrial
P40937	RFC5	7.89012								ü			RFC5_HUMAN Replication factor C subunit 5
P40938	RFC3	5.71904								ü			RFC3_HUMAN Replication factor C subunit 3
P40939	HADHA	9.15046				ü							ECHA_HUMAN Trifunctional enzyme subunit alpha, mitochondrial
P41212	ETV6	7.23687								ü			ETV6_HUMAN Transcription factor ETV6
P41214	EIF2D	11.474					ü			ü		ü	EIF2D_HUMAN Eukaryotic translation initiation factor 2D
P41223	BUD31	5.79554								ü			BUD31_HUMAN Protein BUD31 homolog
P41227	NAA10	3.92829					ü			ü		ü	NAA10_HUMAN N-alpha-acetyltransferase 10
P41240	CSK	13.8768	ü		ü		ü						CSK_HUMAN Tyrosine-protein kinase CSK
P41250	GARS	11.8426	ü			ü	ü			ü			SYG_HUMAN Glycine--tRNA ligase
P41252	IARS	10.4911	ü				ü			ü			SYIC_HUMAN Isoleucine--tRNA ligase, cytoplasmic
P42025	ACTR1B	9.21493	ü				ü	ü					ACTY_HUMAN Beta-centractin
P42126	ECI1	7.34422	ü			ü							ECI1_HUMAN Enoyl-CoA delta isomerase 1, mitochondrial
P42166	TMPO	12.2964								ü			LAP2A_HUMAN Lamina-associated polypeptide 2, isoform alpha
P42167	TMPO	18.9695								ü			LAP2B_HUMAN Lamina-associated polypeptide 2, isoforms beta/gamma
P42224	STAT1	11.7782					ü			ü			STAT1_HUMAN Signal transducer and activator of transcription 1-alpha/beta
P42285	SKIV2L2	7.52276								ü			SK2L2_HUMAN Superkiller viralicidic activity 2-like 2
P42677	RPS27	2.15967					ü			ü		ü	RS27_HUMAN 40S ribosomal protein S27
P42696	RBM34	6.89356								ü			RBM34_HUMAN RNA-binding protein 34
P42704	LRPPRC	9.29401				ü		ü		ü			LPPRC_HUMAN Leucine-rich PPR motif-containing protein, mitochondrial
P42765	ACAA2	13.0266	ü			ü		ü					THIM_HUMAN 3-ketoacyl-CoA thiolase, mitochondrial
P42766	RPL35	1.68797					ü			ü		ü	RL35_HUMAN 60S ribosomal protein L35
P43243	MATR3	12.8289								ü			MATR3_HUMAN Matrin-3
P43304	GPD2	7.6053				ü							GPDM_HUMAN Glycerol-3-phosphate dehydrogenase, mitochondrial
P43307	SSR1	16.8076											SSRA_HUMAN Translocon-associated protein subunit alpha
P43487	RANBP1	14.3896						ü		ü			RANG_HUMAN Ran-specific GTPase-activating protein
P43490	NAMPT	21.3736	ü		ü		ü			ü			NAMPT_HUMAN Nicotinamide phosphoribosyltransferase
P43686	PSMC4	5.29362					ü			ü	ü		PRS6B_HUMAN 26S protease regulatory subunit 6B
P43897-2	TSFM	15.6255				ü				ü			EFTS_HUMAN Isoform 2 of Elongation factor Ts, mitochondrial
P45877	PPIC	10.5454	ü										PPIC_HUMAN Peptidyl-prolyl cis-trans isomerase C
P45880-1	VDAC2	18.7845	ü			ü				ü			VDAC2_HUMAN Isoform 1 of Voltage-dependent anion-selective channel protein 2
P45954	ACADSB	15.1177	ü			ü							ACDSB_HUMAN Short/branched chain specific acyl-CoA dehydrogenase, mitochondrial
P45973	CBX5	9.04184								ü			CBX5_HUMAN Chromobox protein homolog 5
P45983	MAPK8	6.37435				ü	ü			ü			MK08_HUMAN Mitogen-activated protein kinase 8
P46013	MKI67	8.98441								ü			KI67_HUMAN Antigen KI-67
P46019	PHKA2	10.7682			ü		ü						KPB2_HUMAN Phosphorylase b kinase regulatory subunit alpha, liver isoform
P46060	RANGAP1	7.92984					ü	ü		ü			RAGP1_HUMAN Ran GTPase-activating protein 1
P46063	RECQL	9.84025								ü			RECQ1_HUMAN ATP-dependent DNA helicase Q1
P46087-4	NOP2	14.945								ü			NOP2_HUMAN Isoform 4 of Putative ribosomal RNA methyltransferase NOP2
P46199	MTIF2	8.34413				ü				ü			IF2M_HUMAN Translation initiation factor IF-2, mitochondrial
P46379-3	BAG6	8.16043					ü			ü			BAG6_HUMAN Isoform 3 of Large proline-rich protein BAG6
P46459	NSF	11.6183	ü	ü	ü		ü		ü				NSF_HUMAN Vesicle-fusing ATPase
P46776	RPL27A	9.27411					ü					ü	RL27A_HUMAN 60S ribosomal protein L27a
P46777	RPL5	12.81	ü				ü			ü		ü	RL5_HUMAN 60S ribosomal protein L5
P46778	RPL21	14.5344					ü			ü		ü	RL21_HUMAN 60S ribosomal protein L21
P46779-3	RPL28	7.58865	ü				ü					ü	RL28_HUMAN Isoform 3 of 60S ribosomal protein L28
P46781	RPS9	5.0407	ü				ü			ü		ü	RS9_HUMAN 40S ribosomal protein S9
P46782	RPS5	1.89338	ü				ü			ü		ü	RS5_HUMAN 40S ribosomal protein S5
P46940	IQGAP1	13.9382	ü		ü		ü	ü		ü			IQGA1_HUMAN Ras GTPase-activating-like protein IQGAP1
P46977	STT3A	13.7366											STT3A_HUMAN Dolichyl-diphosphooligosaccharide--protein glycosyltransferase subunit STT3A
P47756	CAPZB	15.4824	ü				ü	ü					CAPZB_HUMAN F-actin-capping protein subunit beta
P47813	EIF1AX	10.672					ü						IF1AX_HUMAN Eukaryotic translation initiation factor 1A, X-chromosomal
P47897	QARS	14.8776				ü	ü						SYQ_HUMAN Glutamine--tRNA ligase
P47914	RPL29	3.67055					ü					ü	RL29_HUMAN 60S ribosomal protein L29
P47989	XDH	13.6715					ü						XDH_HUMAN Xanthine dehydrogenase/oxidase
P48047	ATP5O	12.1456	ü		ü	ü				ü			ATPO_HUMAN ATP synthase subunit O, mitochondrial
P48059-3	LIMS1	10.8917			ü		ü						LIMS1_HUMAN Isoform 3 of LIM and senescent cell antigen-like-containing domain protein 1
P48382	RFX5	12.2011								ü			RFX5_HUMAN DNA-binding protein RFX5
P48426	PIP4K2A	20.7903			ü		ü			ü			PI42A_HUMAN Phosphatidylinositol 5-phosphate 4-kinase type-2 alpha
P48443	RXRG	5.9909								ü			RXRG_HUMAN Retinoic acid receptor RXR-gamma
P48444	ARCN1	7.94802		ü			ü						COPD_HUMAN Coatomer subunit delta
P48509	CD151	6.33416			ü		ü						CD151_HUMAN CD151 antigen
P48552	NRIP1	2.75441								ü			NRIP1_HUMAN Nuclear receptor-interacting protein 1
P48556	PSMD8	11.2269	ü				ü			ü	ü		PSMD8_HUMAN 26S proteasome non-ATPase regulatory subunit 8
P48634	PRRC2A	13.7666	ü		ü					ü			PRC2A_HUMAN Protein PRRC2A
P48643	CCT5	4.58309	ü				ü	ü		ü			TCPE_HUMAN T-complex protein 1 subunit epsilon
P48651	PTDSS1	18.7998											PTSS1_HUMAN Phosphatidylserine synthase 1
P48735	IDH2	14.2447	ü			ü	ü						IDHP_HUMAN Isocitrate dehydrogenase [NADP], mitochondrial
P48739-2	PITPNB	10.0675	ü	ü									PIPNB_HUMAN Isoform 2 of Phosphatidylinositol transfer protein beta isoform
P49005	POLD2	5.96153								ü			DPOD2_HUMAN DNA polymerase delta subunit 2
P49023-3	PXN	9.50037			ü		ü	ü		ü			PAXI_HUMAN Isoform Gamma of Paxillin
P49069	CAMLG	12.1647											CAMLG_HUMAN Calcium signal-modulating cyclophilin ligand
P49137	MAPKAPK2	7.25049	ü				ü	ü		ü			MAPK2_HUMAN MAP kinase-activated protein kinase 2
P49321-3	NASP	16.4643								ü			NASP_HUMAN Isoform 3 of Nuclear autoantigenic sperm protein
P49327	FASN	7.53585	ü	ü	ü	ü	ü						FAS_HUMAN Fatty acid synthase
P49336	CDK8	11.6987								ü			CDK8_HUMAN Cyclin-dependent kinase 8
P49366	DHPS	9.90918					ü						DHYS_HUMAN Deoxyhypusine synthase
P49368	CCT3	2.52182	ü		ü		ü	ü					TCPG_HUMAN T-complex protein 1 subunit gamma
P49407	ARRB1	11.8487		ü	ü		ü		ü	ü			ARRB1_HUMAN Beta-arrestin-1
P49411	TUFM	20.5255	ü			ü							EFTU_HUMAN Elongation factor Tu, mitochondrial
P49419	ALDH7A1	15.7749	ü			ü	ü			ü			AL7A1_HUMAN Alpha-aminoadipic semialdehyde dehydrogenase
P49454	CENPF	4.82256			ü		ü	ü		ü			CENPF_HUMAN Centromere protein F
P49458	SRP9	7.88384	ü				ü						SRP09_HUMAN Signal recognition particle 9 kDa protein
P49585	PCYT1A	15.4997			ü		ü			ü			PCY1A_HUMAN Choline-phosphate cytidylyltransferase A
P49588	AARS	10.153	ü			ü	ü						SYAC_HUMAN Alanine--tRNA ligase, cytoplasmic
P49589-3	CARS	9.57782					ü						SYCC_HUMAN Isoform 3 of Cysteine--tRNA ligase, cytoplasmic
P49591	SARS	5.83555	ü				ü						SYSC_HUMAN Serine--tRNA ligase, cytoplasmic
P49643	PRIM2	8.09941								ü			PRI2_HUMAN DNA primase large subunit
P49711	CTCF	13.2154								ü			CTCF_HUMAN Transcriptional repressor CTCF
P49720	PSMB3	4.15332	ü	ü		ü	ü	ü		ü	ü		PSB3_HUMAN Proteasome subunit beta type-3
P49736	MCM2	11.4589						ü		ü			MCM2_HUMAN DNA replication licensing factor MCM2
P49748-3	ACADVL	6.95093				ü				ü			ACADV_HUMAN Isoform 3 of Very long-chain specific acyl-CoA dehydrogenase, mitochondrial
P49750-4	YLPM1	13.3683								ü			YLPM1_HUMAN Isoform 4 of YLP motif-containing protein 1
P49753	ACOT2	11.6241	ü			ü							ACOT2_HUMAN Acyl-coenzyme A thioesterase 2, mitochondrial
P49755	TMED10	8.74634	ü	ü	ü								TMEDA_HUMAN Transmembrane emp24 domain-containing protein 10
P49756	RBM25	10.515								ü			RBM25_HUMAN RNA-binding protein 25
P49757	NUMB	8.92196			ü					ü			NUMB_HUMAN Protein numb homolog
P49773	HINT1	16.8772	ü		ü			ü		ü			HINT1_HUMAN Histidine triad nucleotide-binding protein 1
P49790	NUP153	16.4487								ü			NU153_HUMAN Nuclear pore complex protein Nup153
P49792	RANBP2	8.85698				ü	ü	ü		ü			RBP2_HUMAN E3 SUMO-protein ligase RanBP2
P49821	NDUFV1	5.5926				ü							NDUV1_HUMAN NADH dehydrogenase [ubiquinone] flavoprotein 1, mitochondrial
P49840	GSK3A	14.3064				ü	ü						GSK3A_HUMAN Glycogen synthase kinase-3 alpha
P49848-3	TAF6	1.61543								ü			TAF6_HUMAN Isoform 3 of Transcription initiation factor TFIID subunit 6
P49902	NT5C2	8.68062					ü						5NTC_HUMAN Cytosolic purine 5'-nucleotidase
P49903	SEPHS1	19.0164			ü					ü			SPS1_HUMAN Selenide, water dikinase 1
P49915	GMPS	17.4026					ü						GUAA_HUMAN GMP synthase [glutamine-hydrolyzing]
P50148	GNAQ	19.7422	ü		ü				ü	ü			GNAQ_HUMAN Guanine nucleotide-binding protein G(q) subunit alpha
P50213	IDH3A	12.3732				ü				ü			IDH3A_HUMAN Isocitrate dehydrogenase [NAD] subunit alpha, mitochondrial
P50219	MNX1	6.98174								ü			MNX1_HUMAN Motor neuron and pancreas homeobox protein 1
P50395	GDI2	12.2898	ü	ü			ü						GDIB_HUMAN Rab GDP dissociation inhibitor beta
P50402	EMD	14.1922						ü		ü			EMD_HUMAN Emerin
P50416	CPT1A	14.0427				ü							CPT1A_HUMAN Carnitine O-palmitoyltransferase 1, liver isoform
P50454	SERPINH1	8.46954	ü										SERPH_HUMAN Serpin H1
P50461	CSRP3	10.5246						ü		ü			CSRP3_HUMAN Cysteine and glycine-rich protein 3
P50502	ST13	10.9814	ü				ü						F10A1_HUMAN Hsc70-interacting protein
P50552	VASP	12.0589	ü		ü		ü	ü					VASP_HUMAN Vasodilator-stimulated phosphoprotein
P50570-4	DNM2	10.2491	ü	ü	ü	ü	ü	ü		ü			DYN2_HUMAN Isoform 4 of Dynamin-2
P50750-2	CDK9	4.52919								ü			CDK9_HUMAN Isoform 2 of Cyclin-dependent kinase 9
P50897	PPT1	2.94818	ü	ü			ü		ü	ü			PPT1_HUMAN Palmitoyl-protein thioesterase 1
P50990	CCT8	8.82878	ü				ü	ü		ü			TCPQ_HUMAN T-complex protein 1 subunit theta
P50991	CCT4	10.5905	ü				ü	ü		ü			TCPD_HUMAN T-complex protein 1 subunit delta
P50995	ANXA11	12.6973	ü					ü	ü	ü			ANX11_HUMAN Annexin A11
P51114	FXR1	10.6132								ü			FXR1_HUMAN Fragile X mental retardation syndrome-related protein 1
P51116	FXR2	9.446	ü				ü			ü		ü	FXR2_HUMAN Fragile X mental retardation syndrome-related protein 2
P51148-2	RAB5C	11.8285	ü		ü				ü				RAB5C_HUMAN Isoform 2 of Ras-related protein Rab-5C
P51149	RAB7A	20.1262	ü	ü	ü		ü		ü				RAB7A_HUMAN Ras-related protein Rab-7a
P51153	RAB13	12.6904	ü	ü	ü								RAB13_HUMAN Ras-related protein Rab-13
P51159	RAB27A	75.5886	ü	ü	ü				ü				RB27A_HUMAN Ras-related protein Rab-27A
P51160	PDE6C	10.4705			ü								PDE6C_HUMAN Cone cGMP-specific 3',5'-cyclic phosphodiesterase subunit alpha'
P51398	DAP3	8.10604				ü				ü		ü	RT29_HUMAN 28S ribosomal protein S29, mitochondrial
P51452	DUSP3	12.4109	ü				ü			ü			DUS3_HUMAN Dual specificity protein phosphatase 3
P51572-2	BCAP31	24.1431		ü	ü	ü	ü						BAP31_HUMAN Isoform 2 of B-cell receptor-associated protein 31
P51610-4	HCFC1	22.3812				ü				ü			HCFC1_HUMAN Isoform 4 of Host cell factor 1
P51648-2	ALDH3A2	10.1337	ü			ü							AL3A2_HUMAN Isoform 2 of Fatty aldehyde dehydrogenase
P51649-2	ALDH5A1	6.26093				ü							SSDH_HUMAN Isoform 2 of Succinate-semialdehyde dehydrogenase, mitochondrial
P51659-2	HSD17B4	17.0936				ü							DHB4_HUMAN Isoform 2 of Peroxisomal multifunctional enzyme type 2
P51665	PSMD7	6.92801	ü				ü			ü	ü		PSMD7_HUMAN 26S proteasome non-ATPase regulatory subunit 7
P51668	UBE2D1	12.1519					ü			ü			UB2D1_HUMAN Ubiquitin-conjugating enzyme E2 D1
P51784	USP11	4.60532								ü			UBP11_HUMAN Ubiquitin carboxyl-terminal hydrolase 11
P51809-2	VAMP7	12.6787	ü	ü	ü				ü				VAMP7_HUMAN Isoform 2 of Vesicle-associated membrane protein 7
P51825-2	AFF1	7.44919								ü			AFF1_HUMAN Isoform 2 of AF4/FMR2 family member 1
P51858-3	HDGF	11.7762								ü			HDGF_HUMAN Isoform 3 of Hepatoma-derived growth factor
P51965	UBE2E1	9.21371					ü			ü			UB2E1_HUMAN Ubiquitin-conjugating enzyme E2 E1
P51970	NDUFA8	6.11079				ü							NDUA8_HUMAN NADH dehydrogenase [ubiquinone] 1 alpha subcomplex subunit 8
P51991	HNRNPA3	13.5778								ü			ROA3_HUMAN Heterogeneous nuclear ribonucleoprotein A3
P52209	PGD	10.6458	ü				ü			ü			6PGD_HUMAN 6-phosphogluconate dehydrogenase, decarboxylating
P52272	HNRNPM	12.7698	ü							ü			HNRPM_HUMAN Heterogeneous nuclear ribonucleoprotein M
P52272-2	HNRNPM	11.6241	ü							ü			HNRPM_HUMAN Isoform 2 of Heterogeneous nuclear ribonucleoprotein M
P52292	KPNA2	5.31107					ü			ü			IMA1_HUMAN Importin subunit alpha-1
P52294	KPNA1	12.2227					ü			ü			IMA5_HUMAN Importin subunit alpha-5
P52306-5	RAP1GDS1	12.169	ü			ü	ü						GDS1_HUMAN Isoform 5 of Rap1 GTPase-GDP dissociation stimulator 1
P52569-3	SLC7A2	6.90317			ü								CTR2_HUMAN Isoform 3 of Low affinity cationic amino acid transporter 2
P52594-4	AGFG1	10.4927								ü			AGFG1_HUMAN Isoform 4 of Arf-GAP domain and FG repeat-containing protein 1
P52597	HNRNPF	10.2994			ü					ü			HNRPF_HUMAN Heterogeneous nuclear ribonucleoprotein F
P52701	MSH6	5.0754		ü						ü			MSH6_HUMAN DNA mismatch repair protein Msh6
P52735	VAV2	10.9814			ü		ü						VAV2_HUMAN Guanine nucleotide exchange factor VAV2
P52756	RBM5	11.0286								ü			RBM5_HUMAN RNA-binding protein 5
P52788	SMS	10.5454	ü				ü						SPSY_HUMAN Spermine synthase
P52907	CAPZA1	13.3529	ü				ü	ü					CAZA1_HUMAN F-actin-capping protein subunit alpha-1
P52943	CRIP2	14.1286											CRIP2_HUMAN Cysteine-rich protein 2
P52943-2	CRIP2	20.9473											CRIP2_HUMAN Isoform 2 of Cysteine-rich protein 2
P52948	NUP98	11.8003					ü			ü			NUP98_HUMAN Nuclear pore complex protein Nup98-Nup96
P53004	BLVRA	14.5131	ü				ü						BIEA_HUMAN Biliverdin reductase A
P53007	SLC25A1	14.143	ü			ü				ü			TXTP_HUMAN Tricarboxylate transport protein, mitochondrial
P53041	PPP5C	6.67386			ü		ü			ü			PPP5_HUMAN Serine/threonine-protein phosphatase 5
P53350	PLK1	5.1348			ü		ü	ü		ü			PLK1_HUMAN Serine/threonine-protein kinase PLK1
P53355-3	DAPK1	2.88944			ü			ü					DAPK1_HUMAN Isoform 3 of Death-associated protein kinase 1
P53365	ARFIP2	13.3067		ü	ü		ü						ARFP2_HUMAN Arfaptin-2
P53367	ARFIP1	15.2407		ü			ü						ARFP1_HUMAN Arfaptin-1
P53396	ACLY	4.08743	ü		ü		ü			ü			ACLY_HUMAN ATP-citrate synthase
P53582	METAP1	17.5836					ü			ü		ü	MAP11_HUMAN Methionine aminopeptidase 1
P53597	SUCLG1	12.4757	ü		ü	ü	ü						SUCA_HUMAN Succinyl-CoA ligase [ADP/GDP-forming] subunit alpha, mitochondrial
P53618	COPB1	9.13598		ü	ü		ü						COPB_HUMAN Coatomer subunit beta
P53621-2	COPA	11.7722	ü	ü			ü						COPA_HUMAN Isoform 2 of Coatomer subunit alpha
P53701	HCCS	15.1707				ü							CCHL_HUMAN Cytochrome c-type heme lyase
P53779	MAPK10	8.25568			ü	ü	ü			ü			MK10_HUMAN Mitogen-activated protein kinase 10
P53801	PTTG1IP	5.36243	ü							ü			PTTG_HUMAN Pituitary tumor-transforming gene 1 protein-interacting protein
P53985	SLC16A1	15.2642	ü		ü	ü		ü					MOT1_HUMAN Monocarboxylate transporter 1
P53990-5	IST1	12.4622	ü				ü	ü		ü			IST1_HUMAN Isoform 5 of IST1 homolog
P53999	SUB1	7.82863	ü							ü			TCP4_HUMAN Activated RNA polymerase II transcriptional coactivator p15
P54136	RARS	12.3688	ü			ü	ü			ü			SYRC_HUMAN Arginine--tRNA ligase, cytoplasmic
P54577	YARS	11.2946					ü			ü			SYYC_HUMAN Tyrosine--tRNA ligase, cytoplasmic
P54578	USP14	11.5737	ü		ü						ü		UBP14_HUMAN Ubiquitin carboxyl-terminal hydrolase 14
P54709	ATP1B3	4.35914	ü		ü								AT1B3_HUMAN Sodium/potassium-transporting ATPase subunit beta-3
P54819	AK2	11.0093	ü			ü							KAD2_HUMAN Adenylate kinase 2, mitochondrial
P54886	ALDH18A1	11.9839				ü							P5CS_HUMAN Delta-1-pyrroline-5-carboxylate synthase
P54920	NAPA	11.2615	ü	ü	ü		ü						SNAA_HUMAN Alpha-soluble NSF attachment protein
P55010	EIF5	13.0906			ü		ü			ü			IF5_HUMAN Eukaryotic translation initiation factor 5
P55011	SLC12A2	6.00908	ü		ü								S12A2_HUMAN Solute carrier family 12 member 2
P55039	DRG2	8.48925				ü				ü			DRG2_HUMAN Developmentally-regulated GTP-binding protein 2
P55060	CSE1L	7.33024	ü				ü			ü			XPO2_HUMAN Exportin-2
P55061	TMBIM6	1.67415			ü	ü				ü			BI1_HUMAN Bax inhibitor 1
P55072	VCP	47.4109	ü				ü			ü	ü		TERA_HUMAN Transitional endoplasmic reticulum ATPase
P55081	MFAP1	7.57124											MFAP1_HUMAN Microfibrillar-associated protein 1
P55084	HADHB	11.278	ü			ü							ECHB_HUMAN Trifunctional enzyme subunit beta, mitochondrial
P55145	MANF	14.7384								ü			MANF_HUMAN Mesencephalic astrocyte-derived neurotrophic factor
P55199	ELL	8.90019						ü		ü			ELL_HUMAN RNA polymerase II elongation factor ELL
P55201-2	BRPF1	6.60077			ü					ü			BRPF1_HUMAN Isoform 2 of Peregrin
P55209	NAP1L1	5.26068								ü			NP1L1_HUMAN Nucleosome assembly protein 1-like 1
P55263	ADK	12.879					ü			ü			ADK_HUMAN Adenosine kinase
P55265-4	ADAR	9.93759								ü			DSRAD_HUMAN Isoform 4 of Double-stranded RNA-specific adenosine deaminase
P55317	FOXA1	3.82933								ü			FOXA1_HUMAN Hepatocyte nuclear factor 3-alpha
P55769	NHP2L1	4.88063					ü			ü		ü	NH2L1_HUMAN NHP2-like protein 1
P55786	NPEPPS	11.5698	ü				ü			ü			PSA_HUMAN Puromycin-sensitive aminopeptidase
P55795	HNRNPH2	11.2378								ü			HNRH2_HUMAN Heterogeneous nuclear ribonucleoprotein H2
P55854	SUMO3	12.0401	ü							ü			SUMO3_HUMAN Small ubiquitin-related modifier 3
P55884-2	EIF3B	10.7465	ü				ü			ü			EIF3B_HUMAN Isoform 2 of Eukaryotic translation initiation factor 3 subunit B
P56159	GFRA1	4.53987	ü		ü								GFRA1_HUMAN GDNF family receptor alpha-1
P56181	NDUFV3	5.57327				ü				ü			NDUV3_HUMAN NADH dehydrogenase [ubiquinone] flavoprotein 3, mitochondrial
P56181-2	NDUFV3	14.0741				ü				ü			NDUV3_HUMAN Isoform 2 of NADH dehydrogenase [ubiquinone] flavoprotein 3, mitochondrial
P56182	RRP1	4.4803								ü			RRP1_HUMAN Ribosomal RNA processing protein 1 homolog A
P56192	MARS	14.6978	ü				ü						SYMC_HUMAN Methionine--tRNA ligase, cytoplasmic
P56211	ARPP19	8.44683								ü			ARP19_HUMAN cAMP-regulated phosphoprotein 19
P56270-2	MAZ	10.5695								ü			MAZ_HUMAN Isoform 2 of Myc-associated zinc finger protein
P56378	MP68	4.48988				ü							68MP_HUMAN 6.8 kDa mitochondrial proteolipid
P56545-2	CTBP2	8.4079								ü			CTBP2_HUMAN Isoform 2 of C-terminal-binding protein 2
P56556	NDUFA6	4.66295				ü							NDUA6_HUMAN NADH dehydrogenase [ubiquinone] 1 alpha subcomplex subunit 6
P56589	PEX3	6.66937					ü			ü			PEX3_HUMAN Peroxisomal biogenesis factor 3
P56962	STX17	10.6213				ü	ü		ü				STX17_HUMAN Syntaxin-17
P57076	C21orf59	4.57493					ü			ü			CU059_HUMAN UPF0769 protein C21orf59
P57088	TMEM33	11.0146	ü							ü			TMM33_HUMAN Transmembrane protein 33
P57105	SYNJ2BP	19.0373			ü	ü							SYJ2B_HUMAN Synaptojanin-2-binding protein
P57721	PCBP3	10.5776	ü				ü			ü			PCBP3_HUMAN Poly(rC)-binding protein 3
P57723	PCBP4	9.77916					ü						PCBP4_HUMAN Poly(rC)-binding protein 4
P57737-3	CORO7	10.7232		ü			ü						CORO7_HUMAN Isoform 3 of Coronin-7
P57772	EEFSEC	2.8015				ü				ü			SELB_HUMAN Selenocysteine-specific elongation factor
P58107	EPPK1	12.338			ü			ü		ü			EPIPL_HUMAN Epiplakin
P58546	MTPN	14.2126	ü				ü	ü		ü			MTPN_HUMAN Myotrophin
P59998-2	ARPC4	3.87688	ü				ü	ü					ARPC4_HUMAN Isoform 2 of Actin-related protein 2/3 complex subunit 4
P60033	CD81	8.21362	ü		ü								CD81_HUMAN CD81 antigen
P60059	SEC61G	5.58224					ü						SC61G_HUMAN Protein transport protein Sec61 subunit gamma
P60174	TPI1	26.7728	ü				ü			ü			TPIS_HUMAN Triosephosphate isomerase
P60228	EIF3E	4.76914	ü				ü			ü			EIF3E_HUMAN Eukaryotic translation initiation factor 3 subunit E
P60468	SEC61B	6.87782					ü						SC61B_HUMAN Protein transport protein Sec61 subunit beta
P60520	GABARAPL2	8.12885		ü			ü						GBRL2_HUMAN Gamma-aminobutyric acid receptor-associated protein-like 2
P60660-2	MYL6	6.5262	ü				ü	ü					MYL6_HUMAN Isoform Smooth muscle of Myosin light polypeptide 6
P60709	ACTB	14.9289	ü		ü		ü	ü		ü			ACTB_HUMAN Actin, cytoplasmic 1
P60842	EIF4A1	6.27794	ü				ü			ü			IF4A1_HUMAN Eukaryotic initiation factor 4A-I
P60866-2	RPS20	5.35621	ü				ü			ü		ü	RS20_HUMAN Isoform 2 of 40S ribosomal protein S20
P60891	PRPS1	16.8896					ü						PRPS1_HUMAN Ribose-phosphate pyrophosphokinase 1
P60900	PSMA6	2.2185	ü				ü			ü	ü		PSA6_HUMAN Proteasome subunit alpha type-6
P60903	S100A10	2.99002	ü		ü								S10AA_HUMAN Protein S100-A10
P60953	CDC42	20.9663	ü	ü	ü		ü	ü					CDC42_HUMAN Cell division control protein 42 homolog
P60953-1	CDC42	13.7175	ü	ü	ü		ü	ü					CDC42_HUMAN Isoform 1 of Cell division control protein 42 homolog
P60981	DSTN	13.5275	ü					ü					DEST_HUMAN Destrin
P60983	GMFB	12.2227											GMFB_HUMAN Glia maturation factor beta
P61006	RAB8A	16.48	ü	ü	ü		ü	ü		ü			RAB8A_HUMAN Ras-related protein Rab-8A
P61009	SPCS3	15.2777											SPCS3_HUMAN Signal peptidase complex subunit 3
P61011	SRP54	5.58404					ü			ü			SRP54_HUMAN Signal recognition particle 54 kDa protein
P61026	RAB10	13.1677	ü	ü	ü								RAB10_HUMAN Ras-related protein Rab-10
P61077-3	UBE2D3	11.3705	ü		ü		ü			ü			UB2D3_HUMAN Isoform 3 of Ubiquitin-conjugating enzyme E2 D3
P61081	UBE2M	16.4331	ü				ü						UBC12_HUMAN NEDD8-conjugating enzyme Ubc12
P61086	UBE2K	19.8666	ü							ü			UBE2K_HUMAN Ubiquitin-conjugating enzyme E2 K
P61088	UBE2N	12.3578	ü				ü			ü			UBE2N_HUMAN Ubiquitin-conjugating enzyme E2 N
P61106	RAB14	34.0111	ü	ü	ü		ü		ü				RAB14_HUMAN Ras-related protein Rab-14
P61158	ACTR3	11.9632	ü				ü	ü					ARP3_HUMAN Actin-related protein 3
P61160-2	ACTR2	12.7746	ü				ü	ü					ARP2_HUMAN Isoform 2 of Actin-related protein 2
P61163	ACTR1A	4.76914	ü		ü		ü	ü					ACTZ_HUMAN Alpha-centractin
P61201-2	COPS2	8.61909								ü			CSN2_HUMAN Isoform 2 of COP9 signalosome complex subunit 2
P61204	ARF3	32.2544	ü	ü	ü								ARF3_HUMAN ADP-ribosylation factor 3
P61221	ABCE1	17.6553			ü	ü							ABCE1_HUMAN ATP-binding cassette sub-family E member 1
P61225	RAP2B	14.2506	ü		ü		ü						RAP2B_HUMAN Ras-related protein Rap-2b
P61247	RPS3A	3.17724	ü				ü			ü		ü	RS3A_HUMAN 40S ribosomal protein S3a
P61254	RPL26	2.46338	ü				ü					ü	RL26_HUMAN 60S ribosomal protein L26
P61289-2	PSME3	14.5558					ü			ü	ü		PSME3_HUMAN Isoform 2 of Proteasome activator complex subunit 3
P61313	RPL15	1.22674	ü				ü			ü		ü	RL15_HUMAN 60S ribosomal protein L15
P61353	RPL27	3.04012	ü				ü			ü		ü	RL27_HUMAN 60S ribosomal protein L27
P61421	ATP6V0D1	4.47885	ü		ü			ü	ü				VA0D1_HUMAN V-type proton ATPase subunit d 1
P61586	RHOA	11.9467	ü		ü		ü	ü					RHOA_HUMAN Transforming protein RhoA
P61587	RND3	2.80241	ü	ü									RND3_HUMAN Rho-related GTP-binding protein RhoE
P61604	HSPE1	15.121	ü			ü							CH10_HUMAN 10 kDa heat shock protein, mitochondrial
P61619	SEC61A1	10.3409			ü		ü						S61A1_HUMAN Protein transport protein Sec61 subunit alpha isoform 1
P61758	VBP1	8.66001								ü			PFD3_HUMAN Prefoldin subunit 3
P61923	COPZ1	8.08523		ü			ü						COPZ1_HUMAN Coatomer subunit zeta-1
P61927	RPL37	3.37495					ü					ü	RL37_HUMAN 60S ribosomal protein L37
P61956	SUMO2	8.65244								ü			SUMO2_HUMAN Small ubiquitin-related modifier 2
P61960	UFM1	10.7531	ü							ü			UFM1_HUMAN Ubiquitin-fold modifier 1
P61962	DCAF7	4.71368								ü			DCAF7_HUMAN DDB1- and CUL4-associated factor 7
P61978-2	HNRNPK	16.8362	ü					ü		ü			HNRPK_HUMAN Isoform 2 of Heterogeneous nuclear ribonucleoprotein K
P61978-3	HNRNPK	8.32109	ü					ü		ü			HNRPK_HUMAN Isoform 3 of Heterogeneous nuclear ribonucleoprotein K
P61981	YWHAG	12.6371	ü		ü	ü	ü						1433G_HUMAN 14-3-3 protein gamma
P62072	TIMM10	5.47726				ü							TIM10_HUMAN Mitochondrial import inner membrane translocase subunit Tim10
P62081	RPS7	4.57251	ü				ü	ü		ü		ü	RS7_HUMAN 40S ribosomal protein S7
P62136-2	PPP1CA	10.3578	ü		ü		ü			ü			PP1A_HUMAN Isoform 2 of Serine/threonine-protein phosphatase PP1-alpha catalytic subunit
P62191	PSMC1	4.30687					ü			ü	ü		PRS4_HUMAN 26S protease regulatory subunit 4
P62195	PSMC5	2.95736	ü				ü			ü	ü		PRS8_HUMAN 26S protease regulatory subunit 8
P62241	RPS8	5.80477	ü				ü			ü		ü	RS8_HUMAN 40S ribosomal protein S8
P62244	RPS15A	5.1185	ü			ü	ü			ü		ü	RS15A_HUMAN 40S ribosomal protein S15a
P62249	RPS16	16.0154	ü				ü			ü		ü	RS16_HUMAN 40S ribosomal protein S16
P62256	UBE2H	8.98092											UBE2H_HUMAN Ubiquitin-conjugating enzyme E2 H
P62258	YWHAE	7.93619	ü		ü	ü	ü	ü					1433E_HUMAN 14-3-3 protein epsilon
P62263	RPS14	4.22599	ü			ü	ü			ü		ü	RS14_HUMAN 40S ribosomal protein S14
P62266	RPS23	6.8642					ü			ü		ü	RS23_HUMAN 40S ribosomal protein S23
P62269	RPS18	7.7908	ü				ü			ü		ü	RS18_HUMAN 40S ribosomal protein S18
P62273-2	RPS29	12.7981	ü				ü			ü		ü	RS29_HUMAN Isoform 2 of 40S ribosomal protein S29
P62277	RPS13	9.89786	ü				ü			ü		ü	RS13_HUMAN 40S ribosomal protein S13
P62280	RPS11	4.96737	ü				ü			ü		ü	RS11_HUMAN 40S ribosomal protein S11
P62314	SNRPD1	14.9967					ü			ü			SMD1_HUMAN Small nuclear ribonucleoprotein Sm D1
P62316	SNRPD2	7.91535	ü				ü			ü			SMD2_HUMAN Small nuclear ribonucleoprotein Sm D2
P62318	SNRPD3	4.90619	ü				ü			ü			SMD3_HUMAN Small nuclear ribonucleoprotein Sm D3
P62330	ARF6	9.41648	ü	ü	ü								ARF6_HUMAN ADP-ribosylation factor 6
P62333	PSMC6	4.62499	ü				ü			ü	ü		PRS10_HUMAN 26S protease regulatory subunit 10B
P62341	SELT	13.9607											SELT_HUMAN Selenoprotein T
P62424	RPL7A	2.80116	ü				ü			ü		ü	RL7A_HUMAN 60S ribosomal protein L7a
P62487	POLR2G	6.44968								ü			RPB7_HUMAN DNA-directed RNA polymerase II subunit RPB7
P62495	ETF1	13.2584					ü			ü			ERF1_HUMAN Eukaryotic peptide chain release factor subunit 1
P62701	RPS4X	5.08695	ü				ü			ü		ü	RS4X_HUMAN 40S ribosomal protein S4, X isoform
P62714	PPP2CB	8.69586	ü				ü	ü		ü			PP2AB_HUMAN Serine/threonine-protein phosphatase 2A catalytic subunit beta isoform
P62736	ACTA2	13.1852	ü				ü	ü					ACTA_HUMAN Actin, aortic smooth muscle
P62745	RHOB	5.30944	ü		ü		ü			ü			RHOB_HUMAN Rho-related GTP-binding protein RhoB
P62750	RPL23A	4.90932	ü				ü			ü		ü	RL23A_HUMAN 60S ribosomal protein L23a
P62753	RPS6	6.31454					ü			ü		ü	RS6_HUMAN 40S ribosomal protein S6
P62805	HIST1H4A	19.776	ü							ü			H4_HUMAN Histone H4
P62820	RAB1A	15.3487	ü	ü			ü						RAB1A_HUMAN Ras-related protein Rab-1A
P62826	RAN	12.1776	ü				ü	ü		ü			RAN_HUMAN GTP-binding nuclear protein Ran
P62829	RPL23	7.96996	ü				ü			ü		ü	RL23_HUMAN 60S ribosomal protein L23
P62834	RAP1A	19.3131	ü		ü		ü						RAP1A_HUMAN Ras-related protein Rap-1A
P62841	RPS15	6.33821					ü			ü		ü	RS15_HUMAN 40S ribosomal protein S15
P62847-4	RPS24	6.6368					ü			ü		ü	RS24_HUMAN Isoform 4 of 40S ribosomal protein S24
P62851	RPS25	2.51013	ü				ü			ü		ü	RS25_HUMAN 40S ribosomal protein S25
P62888	RPL30	2.21892	ü				ü			ü		ü	RL30_HUMAN 60S ribosomal protein L30
P62891	RPL39	6.23839					ü					ü	RL39_HUMAN 60S ribosomal protein L39
P62906	RPL10A	5.16311	ü				ü			ü		ü	RL10A_HUMAN 60S ribosomal protein L10a
P62910	RPL32	2.75825					ü					ü	RL32_HUMAN 60S ribosomal protein L32
P62913	RPL11	5.39918	ü				ü			ü		ü	RL11_HUMAN 60S ribosomal protein L11
P62917	RPL8	2.45449					ü			ü		ü	RL8_HUMAN 60S ribosomal protein L8
P62937	PPIA	9.14684	ü		ü		ü			ü			PPIA_HUMAN Peptidyl-prolyl cis-trans isomerase A
P62979	RPS27A	5.18396	ü		ü		ü			ü		ü	RS27A_HUMAN Ubiquitin-40S ribosomal protein S27a
P62993	GRB2	9.01596	ü	ü	ü		ü			ü			GRB2_HUMAN Growth factor receptor-bound protein 2
P63000-2	RAC1	10.6951	ü	ü	ü		ü	ü		ü			RAC1_HUMAN Isoform B of Ras-related C3 botulinum toxin substrate 1
P63010-2	AP2B1	10.563		ü	ü		ü		ü				AP2B1_HUMAN Isoform 2 of AP-2 complex subunit beta
P63092-4	GNAS	5.60799	ü	ü	ü		ü			ü			GNAS2_HUMAN Isoform 4 of Guanine nucleotide-binding protein G(s) subunit alpha isoforms short
P63104	YWHAZ	15.9564	ü		ü	ü	ü			ü			1433Z_HUMAN 14-3-3 protein zeta/delta
P63165	SUMO1	5.58			ü					ü			SUMO1_HUMAN Small ubiquitin-related modifier 1
P63218	GNG5	10.5663	ü		ü	ü							GBG5_HUMAN Guanine nucleotide-binding protein G(I)/G(S)/G(O) subunit gamma-5
P63220	RPS21	2.58792					ü			ü		ü	RS21_HUMAN 40S ribosomal protein S21
P63241-2	EIF5A	12.4824	ü				ü			ü			IF5A1_HUMAN Isoform 2 of Eukaryotic translation initiation factor 5A-1
P63244	GNB2L1	7.40463	ü		ü	ü	ü			ü		ü	GBLP_HUMAN Guanine nucleotide-binding protein subunit beta-2-like 1
P63279	UBE2I	12.5821					ü			ü			UBC9_HUMAN SUMO-conjugating enzyme UBC9
P63313	TMSB10	6.43411						ü					TYB10_HUMAN Thymosin beta-10
P67775	PPP2CA	7.77245	ü		ü	ü	ü	ü		ü			PP2AA_HUMAN Serine/threonine-protein phosphatase 2A catalytic subunit alpha isoform
P67809	YBX1	9.6324	ü							ü			YBOX1_HUMAN Nuclease-sensitive element-binding protein 1
P67812	SEC11A	5.57506	ü										SC11A_HUMAN Signal peptidase complex catalytic subunit SEC11A
P67870	CSNK2B	5.25789	ü		ü		ü			ü			CSK2B_HUMAN Casein kinase II subunit beta
P68036-3	UBE2L3	11.9385	ü							ü			UB2L3_HUMAN Isoform 3 of Ubiquitin-conjugating enzyme E2 L3
P68363	TUBA1B	15.0947	ü		ü			ü					TBA1B_HUMAN Tubulin alpha-1B chain
P68371	TUBB4B	9.93475	ü		ü		ü	ü		ü			TBB4B_HUMAN Tubulin beta-4B chain
P68402	PAFAH1B2	11.6534	ü		ü		ü			ü			PA1B2_HUMAN Platelet-activating factor acetylhydrolase IB subunit beta
P68431	HIST1H3A	1.28185	ü							ü			H31_HUMAN Histone H3.1
P78316	NOP14	5.89762				ü				ü			NOP14_HUMAN Nucleolar protein 14
P78318	IGBP1	11.5352					ü	ü					IGBP1_HUMAN Immunoglobulin-binding protein 1
P78332	RBM6	11.457								ü			RBM6_HUMAN RNA-binding protein 6
P78344	EIF4G2	6.99089					ü						IF4G2_HUMAN Eukaryotic translation initiation factor 4 gamma 2
P78346-2	RPP30	9.02418								ü			RPP30_HUMAN Isoform 2 of Ribonuclease P protein subunit p30
P78347	GTF2I	10.3905								ü			GTF2I_HUMAN General transcription factor II-I
P78356	PIP4K2B	18.9644			ü		ü			ü			PI42B_HUMAN Phosphatidylinositol 5-phosphate 4-kinase type-2 beta
P78371	CCT2	7.16209	ü				ü	ü					TCPB_HUMAN T-complex protein 1 subunit beta
P78406	RAE1	8.13171								ü			RAE1L_HUMAN mRNA export factor
P78413	IRX4	5.52925								ü			IRX4_HUMAN Iroquois-class homeodomain protein IRX-4
P78417	GSTO1	12.8029	ü				ü						GSTO1_HUMAN Glutathione S-transferase omega-1
P78527	PRKDC	25.0324					ü			ü			PRKDC_HUMAN DNA-dependent protein kinase catalytic subunit
P78549	NTHL1	5.01155				ü				ü			NTHL1_HUMAN Endonuclease III-like protein 1
P80404	ABAT	7.90813	ü			ü							GABT_HUMAN 4-aminobutyrate aminotransferase, mitochondrial
P81274	GPSM2	5.41564			ü			ü					GPSM2_HUMAN G-protein-signaling modulator 2
P82650	MRPS22	8.60198				ü						ü	RT22_HUMAN 28S ribosomal protein S22, mitochondrial
P82663	MRPS25	3.75791				ü						ü	RT25_HUMAN 28S ribosomal protein S25, mitochondrial
P82673	MRPS35	2.57589				ü						ü	RT35_HUMAN 28S ribosomal protein S35, mitochondrial
P82675	MRPS5	9.55275				ü	ü					ü	RT05_HUMAN 28S ribosomal protein S5, mitochondrial
P82912	MRPS11	5.99764				ü						ü	RT11_HUMAN 28S ribosomal protein S11, mitochondrial
P82914	MRPS15	3.8719				ü				ü		ü	RT15_HUMAN 28S ribosomal protein S15, mitochondrial
P82930	MRPS34	3.95564				ü						ü	RT34_HUMAN 28S ribosomal protein S34, mitochondrial
P82932	MRPS6	6.77629				ü						ü	RT06_HUMAN 28S ribosomal protein S6, mitochondrial
P82933	MRPS9	7.78642				ü				ü		ü	RT09_HUMAN 28S ribosomal protein S9, mitochondrial
P82979	SARNP	13.0193								ü			SARNP_HUMAN SAP domain-containing ribonucleoprotein
P83111	LACTB	6.19933				ü							LACTB_HUMAN Serine beta-lactamase-like protein LACTB, mitochondrial
P83436	COG7	4.66892		ü						ü			COG7_HUMAN Conserved oligomeric Golgi complex subunit 7
P83731	RPL24	5.6436	ü				ü					ü	RL24_HUMAN 60S ribosomal protein L24
P83881	RPL36A	4.14116			ü		ü					ü	RL36A_HUMAN 60S ribosomal protein L36a
P84090	ERH	11.0339											ERH_HUMAN Enhancer of rudimentary homolog
P84098	RPL19	3.51192					ü			ü		ü	RL19_HUMAN 60S ribosomal protein L19
P84101	SERF2	4.06419					ü			ü			SERF2_HUMAN Small EDRK-rich factor 2
P84103	SRSF3	12.3182								ü			SRSF3_HUMAN Serine/arginine-rich splicing factor 3
P84243	H3F3A	0.955551	ü							ü			H33_HUMAN Histone H3.3
P86791	CCZ1	3.23387							ü				CCZ1_HUMAN Vacuolar fusion protein CCZ1 homolog
P98175	RBM10	11.5198								ü			RBM10_HUMAN RNA-binding protein 10
P99999	CYCS	8.64812				ü	ü			ü			CYC_HUMAN Cytochrome c
Q00059	TFAM	11.9901				ü	ü			ü			TFAM_HUMAN Transcription factor A, mitochondrial
Q00169	PITPNA	10.0777	ü										PIPNA_HUMAN Phosphatidylinositol transfer protein alpha isoform
Q00266	MAT1A	6.83038					ü						METK1_HUMAN S-adenosylmethionine synthase isoform type-1
Q00325	SLC25A3	12.2033	ü		ü	ü				ü			MPCP_HUMAN Phosphate carrier protein, mitochondrial
Q00341	HDLBP	12.4086			ü					ü			VIGLN_HUMAN Vigilin
Q00403	GTF2B	6.19767								ü			TF2B_HUMAN Transcription initiation factor IIB
Q00526	CDK3	7.51135											CDK3_HUMAN Cyclin-dependent kinase 3
Q00535	CDK5	12.4064			ü		ü	ü		ü			CDK5_HUMAN Cyclin-dependent kinase 5
Q00536-2	CDK16	9.09165			ü			ü					CDK16_HUMAN Isoform 2 of Cyclin-dependent kinase 16
Q00537	CDK17	7.49754											CDK17_HUMAN Cyclin-dependent kinase 17
Q00610	CLTC	5.27509	ü	ü	ü	ü	ü	ü	ü				CLH1_HUMAN Clathrin heavy chain 1
Q00613	HSF1	11.2964					ü			ü			HSF1_HUMAN Heat shock factor protein 1
Q00653	NFKB2	5.80525					ü			ü			NFKB2_HUMAN Nuclear factor NF-kappa-B p100 subunit
Q00688	FKBP3	9.87671								ü			FKBP3_HUMAN Peptidyl-prolyl cis-trans isomerase FKBP3
Q00765	REEP5	28.4894	ü										REEP5_HUMAN Receptor expression-enhancing protein 5
Q00839	HNRNPU	12.2681								ü			HNRPU_HUMAN Heterogeneous nuclear ribonucleoprotein U
Q00839-2	HNRNPU	18.7489								ü			HNRPU_HUMAN Isoform Short of Heterogeneous nuclear ribonucleoprotein U
Q00978	IRF9	3.66009					ü			ü			IRF9_HUMAN Interferon regulatory factor 9
Q01081	U2AF1	7.65401								ü			U2AF1_HUMAN Splicing factor U2AF 35 kDa subunit
Q01082	SPTBN1	21.9837	ü		ü		ü	ü		ü			SPTB2_HUMAN Spectrin beta chain, non-erythrocytic 1
Q01082-3	SPTBN1	13.4749	ü		ü		ü	ü		ü			SPTB2_HUMAN Isoform 2 of Spectrin beta chain, non-erythrocytic 1
Q01085-2	TIAL1	8.47058	ü						ü	ü			TIAR_HUMAN Isoform 2 of Nucleolysin TIAR
Q01130	SRSF2	20.5255	ü							ü			SRSF2_HUMAN Serine/arginine-rich splicing factor 2
Q01167	FOXK2	6.37494								ü			FOXK2_HUMAN Forkhead box protein K2
Q01518	CAP1	10.2902	ü		ü			ü					CAP1_HUMAN Adenylyl cyclase-associated protein 1
Q01628	IFITM3	8.06736	ü		ü				ü				IFM3_HUMAN Interferon-induced transmembrane protein 3
Q01650	SLC7A5	6.68158	ü		ü		ü						LAT1_HUMAN Large neutral amino acids transporter small subunit 1
Q01780	EXOSC10	9.27784								ü			EXOSX_HUMAN Exosome component 10
Q01813	PFKP	14.3866	ü				ü			ü			K6PP_HUMAN 6-phosphofructokinase type C
Q01831	XPC	7.63799	ü		ü					ü			XPC_HUMAN DNA repair protein complementing XP-C cells
Q01844-5	EWSR1	8.35318			ü					ü			EWS_HUMAN Isoform 5 of RNA-binding protein EWS
Q02156	PRKCE	18.5185		ü	ü	ü	ü	ü		ü			KPCE_HUMAN Protein kinase C epsilon type
Q02218	OGDH	9.79298				ü	ü						ODO1_HUMAN 2-oxoglutarate dehydrogenase, mitochondrial
Q02241	KIF23	6.64953					ü	ü		ü			KIF23_HUMAN Kinesin-like protein KIF23
Q02252	ALDH6A1	6.35274	ü			ü				ü			MMSA_HUMAN Methylmalonate-semialdehyde dehydrogenase [acylating], mitochondrial
Q02338	BDH1	6.44728				ü				ü			BDH_HUMAN D-beta-hydroxybutyrate dehydrogenase, mitochondrial
Q02447	SP3	7.19929		ü						ü			SP3_HUMAN Transcription factor Sp3
Q02543	RPL18A	9.35548					ü					ü	RL18A_HUMAN 60S ribosomal protein L18a
Q02750	MAP2K1	11.6908	ü	ü	ü	ü	ü	ü		ü			MP2K1_HUMAN Dual specificity mitogen-activated protein kinase kinase 1
Q02790	FKBP4	11.337	ü			ü	ü	ü		ü			FKBP4_HUMAN Peptidyl-prolyl cis-trans isomerase FKBP4
Q02809	PLOD1	6.07012	ü										PLOD1_HUMAN Procollagen-lysine,2-oxoglutarate 5-dioxygenase 1
Q02878	RPL6	3.68303					ü			ü		ü	RL6_HUMAN 60S ribosomal protein L6
Q02978	SLC25A11	19.0216			ü	ü				ü			M2OM_HUMAN Mitochondrial 2-oxoglutarate/malate carrier protein
Q03001	DST	11.4684	ü		ü		ü	ü		ü			DYST_HUMAN Dystonin
Q03060-6	CREM	9.95758								ü			CREM_HUMAN Isoform 3 of cAMP-responsive element modulator
Q03113	GNA12	8.89448			ü								GNA12_HUMAN Guanine nucleotide-binding protein subunit alpha-12
Q03164-3	KMT2A	9.73932								ü			KMT2A_HUMAN Isoform 3 of Histone-lysine N-methyltransferase 2A
Q03167	TGFBR3	9.07736	ü		ü								TGBR3_HUMAN Transforming growth factor beta receptor type 3
Q03252	LMNB2	7.84902						ü		ü			LMNB2_HUMAN Lamin-B2
Q03701	CEBPZ	9.04892								ü			CEBPZ_HUMAN CCAAT/enhancer-binding protein zeta
Q04637-9	EIF4G1	10.3796					ü			ü			IF4G1_HUMAN Isoform 9 of Eukaryotic translation initiation factor 4 gamma 1
Q04726	TLE3	7.62706								ü			TLE3_HUMAN Transducin-like enhancer protein 3
Q04727-3	TLE4	7.15618								ü			TLE4_HUMAN Isoform 3 of Transducin-like enhancer protein 4
Q04837	SSBP1	20.3448	ü			ü				ü			SSBP_HUMAN Single-stranded DNA-binding protein, mitochondrial
Q04917	YWHAH	13.4175	ü		ü	ü	ü						1433F_HUMAN 14-3-3 protein eta
Q05048	CSTF1	8.14318								ü			CSTF1_HUMAN Cleavage stimulation factor subunit 1
Q05084	ICA1	5.76662		ü			ü						ICA69_HUMAN Islet cell autoantigen 1
Q05084-2	ICA1	7.27027		ü			ü						ICA69_HUMAN Isoform 2 of Islet cell autoantigen 1
Q05086	UBE3A	16.0972					ü			ü	ü		UBE3A_HUMAN Ubiquitin-protein ligase E3A
Q05193	DNM1	12.0736	ü	ü	ü	ü		ü					DYN1_HUMAN Dynamin-1
Q05209	PTPN12	20.4891					ü	ü					PTN12_HUMAN Tyrosine-protein phosphatase non-receptor type 12
Q05397-5	PTK2	11.6456			ü		ü	ü		ü			FAK1_HUMAN Isoform 5 of Focal adhesion kinase 1
Q05481	ZNF91	4.92852								ü			ZNF91_HUMAN Zinc finger protein 91
Q05639	EEF1A2	5.67642							ü	ü			EF1A2_HUMAN Elongation factor 1-alpha 2
Q05655-2	PRKCD	10.507	ü		ü		ü			ü			KPCD_HUMAN Isoform 2 of Protein kinase C delta type
Q06124	PTPN11	10.3393				ü	ü			ü			PTN11_HUMAN Tyrosine-protein phosphatase non-receptor type 11
Q06323-2	PSME1	16.4839	ü				ü			ü	ü		PSME1_HUMAN Isoform 2 of Proteasome activator complex subunit 1
Q06587	RING1	16.4136								ü			RING1_HUMAN E3 ubiquitin-protein ligase RING1
Q06787	FMR1	9.69708			ü					ü		ü	FMR1_HUMAN Fragile X mental retardation protein 1
Q06830	PRDX1	15.3216	ü			ü	ü			ü			PRDX1_HUMAN Peroxiredoxin-1
Q07020	RPL18	5.24476					ü			ü		ü	RL18_HUMAN 60S ribosomal protein L18
Q07157	TJP1	10.1501			ü		ü			ü			ZO1_HUMAN Tight junction protein ZO-1
Q07617	SPAG1	12.3622						ü		ü			SPAG1_HUMAN Sperm-associated antigen 1
Q07666	KHDRBS1	36.7328					ü			ü			KHDR1_HUMAN KH domain-containing, RNA-binding, signal transduction-associated protein 1
Q07820	MCL1	1.58738				ü	ü	ü		ü			MCL1_HUMAN Induced myeloid leukemia cell differentiation protein Mcl-1
Q07866-9	KLC1	7.88743					ü	ü					KLC1_HUMAN Isoform I of Kinesin light chain 1
Q07889	SOS1	15.6963			ü		ü						SOS1_HUMAN Son of sevenless homolog 1
Q07955-2	SRSF1	11.7145	ü							ü			SRSF1_HUMAN Isoform ASF-2 of Serine/arginine-rich splicing factor 1
Q07960	ARHGAP1	11.1349	ü				ü						RHG01_HUMAN Rho GTPase-activating protein 1
Q08050-3	FOXM1	8.25863								ü			FOXM1_HUMAN Isoform 4 of Forkhead box protein M1
Q08209	PPP3CA	11.5256			ü	ü	ü			ü			PP2BA_HUMAN Serine/threonine-protein phosphatase 2B catalytic subunit alpha isoform
Q08209-2	PPP3CA	10.8017			ü	ü	ü			ü			PP2BA_HUMAN Isoform 2 of Serine/threonine-protein phosphatase 2B catalytic subunit alpha isoform
Q08211	DHX9	15.1441					ü	ü		ü			DHX9_HUMAN ATP-dependent RNA helicase A
Q08379	GOLGA2	7.1695		ü				ü		ü			GOGA2_HUMAN Golgin subfamily A member 2
Q08380	LGALS3BP	1.7815	ü		ü								LG3BP_HUMAN Galectin-3-binding protein
Q08623-4	HDHD1	23.9677	ü				ü						HDHD1_HUMAN Isoform 4 of Pseudouridine-5'-monophosphatase
Q08722	CD47	15.1045	ü		ü								CD47_HUMAN Leukocyte surface antigen CD47
Q08752	PPID	12.3843								ü			PPID_HUMAN Peptidyl-prolyl cis-trans isomerase D
Q08945	SSRP1	7.17098								ü			SSRP1_HUMAN FACT complex subunit SSRP1
Q08AD1	CAMSAP2	17.7776						ü					CAMP2_HUMAN Calmodulin-regulated spectrin-associated protein 2
Q08AF3	SLFN5	15.1508								ü			SLFN5_HUMAN Schlafen family member 5
Q08J23	NSUN2	12.9126						ü		ü			NSUN2_HUMAN tRNA (cytosine(34)-C(5))-methyltransferase
Q09161	NCBP1	11.378				ü	ü			ü			NCBP1_HUMAN Nuclear cap-binding protein subunit 1
Q09666	AHNAK	13.5539	ü		ü		ü	ü	ü	ü			AHNK_HUMAN Neuroblast differentiation-associated protein AHNAK
Q10471	GALNT2	14.0285	ü	ü									GALT2_HUMAN Polypeptide N-acetylgalactosaminyltransferase 2
Q10472	GALNT1	13.7148		ü									GALT1_HUMAN Polypeptide N-acetylgalactosaminyltransferase 1
Q10567	AP1B1	6.6636		ü			ü		ü				AP1B1_HUMAN AP-1 complex subunit beta-1
Q11201	ST3GAL1	10.7498	ü	ü									SIA4A_HUMAN CMP-N-acetylneuraminate-beta-galactosamide-alpha-2,3-sialyltransferase 1
Q12778	FOXO1	4.32541				ü	ü			ü			FOXO1_HUMAN Forkhead box protein O1
Q12792	TWF1	10.6425						ü					TWF1_HUMAN Twinfilin-1
Q12792-3	TWF1	17.039						ü					TWF1_HUMAN Isoform 3 of Twinfilin-1
Q12797	ASPH	30.2288			ü								ASPH_HUMAN Aspartyl/asparaginyl beta-hydroxylase
Q12824	SMARCB1	7.56959								ü			SNF5_HUMAN SWI/SNF-related matrix-associated actin-dependent regulator of chromatin subfamily B member 1
Q12830	BPTF	10.563	ü							ü			BPTF_HUMAN Nucleosome-remodeling factor subunit BPTF
Q12834	CDC20	2.70824					ü	ü		ü			CDC20_HUMAN Cell division cycle protein 20 homolog
Q12840	KIF5A	17.1954					ü	ü					KIF5A_HUMAN Kinesin heavy chain isoform 5A
Q12846	STX4	9.85004	ü	ü	ü		ü						STX4_HUMAN Syntaxin-4
Q12849	GRSF1	7.39988				ü							GRSF1_HUMAN G-rich sequence factor 1
Q12872-2	SFSWAP	11.3111								ü			SFSWA_HUMAN Isoform 2 of Splicing factor, suppressor of white-apricot homolog
Q12873-3	CHD3	6.78359						ü		ü			CHD3_HUMAN Isoform 3 of Chromodomain-helicase-DNA-binding protein 3
Q12874	SF3A3	13.1577								ü			SF3A3_HUMAN Splicing factor 3A subunit 3
Q12894	IFRD2	6.46834								ü			IFRD2_HUMAN Interferon-related developmental regulator 2
Q12904-2	AIMP1	12.5479		ü			ü			ü			AIMP1_HUMAN Isoform 2 of Aminoacyl tRNA synthase complex-interacting multifunctional protein 1
Q12905	ILF2	8.50592								ü			ILF2_HUMAN Interleukin enhancer-binding factor 2
Q12906-7	ILF3	11.1997				ü				ü			ILF3_HUMAN Isoform 7 of Interleukin enhancer-binding factor 3
Q12907	LMAN2	14.1142	ü	ü	ü								LMAN2_HUMAN Vesicular integral-membrane protein VIP36
Q12929	EPS8	11.7443	ü		ü								EPS8_HUMAN Epidermal growth factor receptor kinase substrate 8
Q12931	TRAP1	13.4045	ü			ü				ü			TRAP1_HUMAN Heat shock protein 75 kDa, mitochondrial
Q12955	ANK3	17.3373		ü	ü		ü	ü	ü				ANK3_HUMAN Ankyrin-3
Q12972	PPP1R8	12.9706								ü			PP1R8_HUMAN Nuclear inhibitor of protein phosphatase 1
Q12981-1	BNIP1	10.0573				ü				ü			SEC20_HUMAN Isoform 3 of Vesicle transport protein SEC20
Q12982-2	BNIP2	14.198					ü	ü		ü			BNIP2_HUMAN Isoform 2 of BCL2/adenovirus E1B 19 kDa protein-interacting protein 2
Q12996	CSTF3	13.6877								ü			CSTF3_HUMAN Cleavage stimulation factor subunit 3
Q13011	ECH1	5.66528	ü			ü							ECH1_HUMAN Delta(3,5)-Delta(2,4)-dienoyl-CoA isomerase, mitochondrial
Q13045	FLII	5.41352						ü		ü			FLII_HUMAN Protein flightless-1 homolog
Q13057-2	COASY	11.2342	ü			ü				ü			COASY_HUMAN Isoform 2 of Bifunctional coenzyme A synthase
Q13084	MRPL28	4.24566				ü						ü	RM28_HUMAN 39S ribosomal protein L28, mitochondrial
Q13123	IK	5.53367								ü			RED_HUMAN Protein Red
Q13127	REST	2.18094					ü			ü			REST_HUMAN RE1-silencing transcription factor
Q13136	PPFIA1	12.688			ü		ü						LIPA1_HUMAN Liprin-alpha-1
Q13144	EIF2B5	11.3836					ü			ü			EI2BE_HUMAN Translation initiation factor eIF-2B subunit epsilon
Q13148	TARDBP	9.66328								ü			TADBP_HUMAN TAR DNA-binding protein 43
Q13151	HNRNPA0	8.45405								ü			ROA0_HUMAN Heterogeneous nuclear ribonucleoprotein A0
Q13155	AIMP2	5.33354					ü			ü			AIMP2_HUMAN Aminoacyl tRNA synthase complex-interacting multifunctional protein 2
Q13177	PAK2	10.1308			ü		ü			ü			PAK2_HUMAN Serine/threonine-protein kinase PAK 2
Q13185	CBX3	21.9073						ü		ü			CBX3_HUMAN Chromobox protein homolog 3
Q13188	STK3	7.11577					ü			ü			STK3_HUMAN Serine/threonine-protein kinase 3
Q13190	STX5	14.6079		ü			ü			ü			STX5_HUMAN Syntaxin-5
Q13191	CBLB	6.49683			ü		ü			ü			CBLB_HUMAN E3 ubiquitin-protein ligase CBL-B
Q13200	PSMD2	6.11349	ü				ü			ü	ü		PSMD2_HUMAN 26S proteasome non-ATPase regulatory subunit 2
Q13217	DNAJC3	12.6371	ü				ü						DNJC3_HUMAN DnaJ homolog subfamily C member 3
Q13227	GPS2	8.72103								ü			GPS2_HUMAN G protein pathway suppressor 2
Q13228	SELENBP1	6.85131	ü				ü			ü			SBP1_HUMAN Selenium-binding protein 1
Q13242	SRSF9	7.6279								ü			SRSF9_HUMAN Serine/arginine-rich splicing factor 9
Q13243	SRSF5	10.7149								ü			SRSF5_HUMAN Serine/arginine-rich splicing factor 5
Q13263	TRIM28	16.3555								ü			TIF1B_HUMAN Transcription intermediary factor 1-beta
Q13283	G3BP1	6.85131					ü			ü			G3BP1_HUMAN Ras GTPase-activating protein-binding protein 1
Q13310-3	PABPC4	8.85132								ü			PABP4_HUMAN Isoform 3 of Polyadenylate-binding protein 4
Q13330	MTA1	9.4576	ü					ü		ü			MTA1_HUMAN Metastasis-associated protein MTA1
Q13347	EIF3I	7.13702	ü				ü						EIF3I_HUMAN Eukaryotic translation initiation factor 3 subunit I
Q13356	PPIL2	9.45115		ü	ü					ü			PPIL2_HUMAN Peptidyl-prolyl cis-trans isomerase-like 2
Q13356-2	PPIL2	6.65783		ü	ü					ü			PPIL2_HUMAN Isoform 2 of Peptidyl-prolyl cis-trans isomerase-like 2
Q13362-2	PPP2R5C	14.5772					ü			ü			2A5G_HUMAN Isoform Gamma-1 of Serine/threonine-protein phosphatase 2A 56 kDa regulatory subunit gamma isoform
Q13362-5	PPP2R5C	11.9859					ü			ü			2A5G_HUMAN Isoform 5 of Serine/threonine-protein phosphatase 2A 56 kDa regulatory subunit gamma isoform
Q13404-1	UBE2V1	13.3554	ü				ü			ü			UB2V1_HUMAN Isoform 1 of Ubiquitin-conjugating enzyme E2 variant 1
Q13405	MRPL49	4.54702				ü						ü	RM49_HUMAN 39S ribosomal protein L49, mitochondrial
Q13409	DYNC1I2	8.14413			ü		ü	ü					DC1I2_HUMAN Cytoplasmic dynein 1 intermediate chain 2
Q13416	ORC2	11.3075						ü		ü			ORC2_HUMAN Origin recognition complex subunit 2
Q13418	ILK	5.29039			ü		ü	ü		ü			ILK_HUMAN Integrin-linked protein kinase
Q13435	SF3B2	7.20602								ü			SF3B2_HUMAN Splicing factor 3B subunit 2
Q13439-5	GOLGA4	13.3503	ü	ü	ü		ü			ü			GOGA4_HUMAN Isoform 5 of Golgin subfamily A member 4
Q13442	PDAP1	10.3578			ü								HAP28_HUMAN 28 kDa heat- and acid-stable phosphoprotein
Q13443	ADAM9	5.2771	ü		ü								ADAM9_HUMAN Disintegrin and metalloproteinase domain-containing protein 9
Q13445	TMED1	21.8935		ü	ü								TMED1_HUMAN Transmembrane emp24 domain-containing protein 1
Q13451	FKBP5	14.987	ü							ü			FKBP5_HUMAN Peptidyl-prolyl cis-trans isomerase FKBP5
Q13492	PICALM	9.16255		ü	ü					ü			PICAL_HUMAN Phosphatidylinositol-binding clathrin assembly protein
Q13501	SQSTM1	8.03369	ü		ü		ü		ü	ü			SQSTM_HUMAN Sequestosome-1
Q13505	MTX1	9.33406				ü							MTX1_HUMAN Metaxin-1
Q13509	TUBB3	13.1827	ü		ü			ü		ü			TBB3_HUMAN Tubulin beta-3 chain
Q13523	PRPF4B	23.3147								ü			PRP4B_HUMAN Serine/threonine-protein kinase PRP4 homolog
Q13526	PIN1	10.2279				ü	ü			ü			PIN1_HUMAN Peptidyl-prolyl cis-trans isomerase NIMA-interacting 1
Q13530	SERINC3	6.23895		ü	ü								SERC3_HUMAN Serine incorporator 3
Q13546	RIPK1	6.92247			ü	ü	ü						RIPK1_HUMAN Receptor-interacting serine/threonine-protein kinase 1
Q13547	HDAC1	7.0306					ü			ü			HDAC1_HUMAN Histone deacetylase 1
Q13572	ITPK1	10.5679			ü		ü						ITPK1_HUMAN Inositol-tetrakisphosphate 1-kinase
Q13573	SNW1	4.99206								ü			SNW1_HUMAN SNW domain-containing protein 1
Q13596-3	SNX1	10.0224		ü	ü		ü						SNX1_HUMAN Isoform 3 of Sorting nexin-1
Q13601	KRR1	7.11504								ü			KRR1_HUMAN KRR1 small subunit processome component homolog
Q13610	PWP1	11.5371		ü						ü			PWP1_HUMAN Periodic tryptophan protein 1 homolog
Q13616	CUL1	13.4827					ü			ü			CUL1_HUMAN Cullin-1
Q13617-2	CUL2	9.08212					ü			ü			CUL2_HUMAN Isoform 2 of Cullin-2
Q13618	CUL3	12.695	ü	ü			ü	ü		ü			CUL3_HUMAN Cullin-3
Q13619	CUL4A	9.60703								ü			CUL4A_HUMAN Cullin-4A
Q13620	CUL4B	14.2976	ü				ü			ü			CUL4B_HUMAN Cullin-4B
Q13625-3	TP53BP2	6.67193				ü				ü			ASPP2_HUMAN Isoform 3 of Apoptosis-stimulating of p53 protein 2
Q13627	DYRK1A	9.74205								ü			DYR1A_HUMAN Dual specificity tyrosine-phosphorylation-regulated kinase 1A
Q13636	RAB31	15.2173		ü	ü								RAB31_HUMAN Ras-related protein Rab-31
Q13637	RAB32	21.7151		ü		ü							RAB32_HUMAN Ras-related protein Rab-32
Q13642	FHL1	22.8309			ü		ü			ü			FHL1_HUMAN Four and a half LIM domains protein 1
Q13724	MOGS	13.2991	ü										MOGS_HUMAN Mannosyl-oligosaccharide glucosidase
Q13765-2	NACA	6.58823	ü							ü			NACA_HUMAN Isoform 2 of Nascent polypeptide-associated complex subunit alpha
Q13795	ARFRP1	12.1264		ü	ü		ü						ARFRP_HUMAN ADP-ribosylation factor-related protein 1
Q13796	SHROOM2	10.5342	ü		ü			ü					SHRM2_HUMAN Protein Shroom2
Q13813-2	SPTAN1	11.313	ü				ü	ü					SPTN1_HUMAN Isoform 2 of Spectrin alpha chain, non-erythrocytic 1
Q13823	GNL2	8.38451								ü			NOG2_HUMAN Nucleolar GTP-binding protein 2
Q13838-2	DDX39B	13.4801								ü			DX39B_HUMAN Isoform 2 of Spliceosome RNA helicase DDX39B
Q13885	TUBB2A	13.4123	ü		ü			ü		ü			TBB2A_HUMAN Tubulin beta-2A chain
Q13895	BYSL	6.31569					ü			ü			BYST_HUMAN Bystin
Q13907-2	IDI1	7.68626					ü						IDI1_HUMAN Isoform 2 of Isopentenyl-diphosphate Delta-isomerase 1
Q14004	CDK13	9.71202		ü						ü			CDK13_HUMAN Cyclin-dependent kinase 13
Q14008-3	CKAP5	7.85258			ü		ü	ü					CKAP5_HUMAN Isoform 3 of Cytoskeleton-associated protein 5
Q14011	CIRBP	5.35084								ü			CIRBP_HUMAN Cold-inducible RNA-binding protein
Q14103	HNRNPD	14.0826	ü				ü			ü			HNRPD_HUMAN Heterogeneous nuclear ribonucleoprotein D0
Q14119	VEZF1	7.18809								ü			VEZF1_HUMAN Vascular endothelial zinc finger 1
Q14151	SAFB2	9.43442	ü							ü			SAFB2_HUMAN Scaffold attachment factor B2
Q14152	EIF3A	10.0311					ü	ü		ü			EIF3A_HUMAN Eukaryotic translation initiation factor 3 subunit A
Q14157-1	UBAP2L	24.1431								ü			UBP2L_HUMAN Isoform 2 of Ubiquitin-associated protein 2-like
Q14157-5	UBAP2L	12.1349								ü			UBP2L_HUMAN Isoform 5 of Ubiquitin-associated protein 2-like
Q14165	MLEC	17.5614			ü								MLEC_HUMAN Malectin
Q14166	TTLL12	21.1004											TTL12_HUMAN Tubulin--tyrosine ligase-like protein 12
Q14192	FHL2	9.49907						ü		ü			FHL2_HUMAN Four and a half LIM domains protein 2
Q14197	ICT1	4.22909				ü						ü	ICT1_HUMAN Peptidyl-tRNA hydrolase ICT1, mitochondrial
Q14203	DCTN1	8.58174			ü		ü	ü		ü			DCTN1_HUMAN Dynactin subunit 1
Q14204	DYNC1H1	6.48043	ü		ü		ü	ü					DYHC1_HUMAN Cytoplasmic dynein 1 heavy chain 1
Q14232	EIF2B1	15.3793			ü		ü						EI2BA_HUMAN Translation initiation factor eIF-2B subunit alpha
Q14240-2	EIF4A2	7.18511					ü						IF4A2_HUMAN Isoform 2 of Eukaryotic initiation factor 4A-II
Q14241	TCEB3	15.8869								ü			ELOA1_HUMAN Transcription elongation factor B polypeptide 3
Q14244-7	MAP7	10.7765			ü			ü					MAP7_HUMAN Isoform 7 of Ensconsin
Q14247	CTTN	31.3499	ü	ü	ü			ü					SRC8_HUMAN Src substrate cortactin
Q14247-2	CTTN	10.2719	ü	ü	ü			ü					SRC8_HUMAN Isoform 2 of Src substrate cortactin
Q14249	ENDOG	4.76816				ü	ü			ü			NUCG_HUMAN Endonuclease G, mitochondrial
Q14258	TRIM25	8.64381					ü			ü			TRI25_HUMAN E3 ubiquitin/ISG15 ligase TRIM25
Q14315	FLNC	15.3896			ü		ü	ü					FLNC_HUMAN Filamin-C
Q14318-2	FKBP8	11.5679				ü							FKBP8_HUMAN Isoform 2 of Peptidyl-prolyl cis-trans isomerase FKBP8
Q14320	FAM50A	11.0957								ü			FA50A_HUMAN Protein FAM50A
Q14344	GNA13	11.0462	ü		ü					ü			GNA13_HUMAN Guanine nucleotide-binding protein subunit alpha-13
Q14435	GALNT3	13.1253	ü	ü									GALT3_HUMAN Polypeptide N-acetylgalactosaminyltransferase 3
Q14444	CAPRIN1	6.07917					ü						CAPR1_HUMAN Caprin-1
Q14457	BECN1	5.83949		ü		ü	ü			ü			BECN1_HUMAN Beclin-1
Q14469	HES1	1.09706								ü			HES1_HUMAN Transcription factor HES-1
Q14493	SLBP	3.33806					ü			ü			SLBP_HUMAN Histone RNA hairpin-binding protein
Q14498	RBM39	8.83215						ü		ü			RBM39_HUMAN RNA-binding protein 39
Q14511-3	NEDD9	3.82722		ü	ü			ü		ü			CASL_HUMAN Isoform 3 of Enhancer of filamentation 1
Q14527	HLTF	12.1349								ü			HLTF_HUMAN Helicase-like transcription factor
Q14534	SQLE	4.67017											ERG1_HUMAN Squalene monooxygenase
Q14554	PDIA5	9.33657											PDIA5_HUMAN Protein disulfide-isomerase A5
Q14566	MCM6	10.0224								ü			MCM6_HUMAN DNA replication licensing factor MCM6
Q14651	PLS1	14.2272	ü		ü			ü					PLSI_HUMAN Plastin-1
Q14653-4	IRF3	7.25049					ü			ü			IRF3_HUMAN Isoform 4 of Interferon regulatory factor 3
Q14669-3	TRIP12	7.91625					ü			ü			TRIPC_HUMAN Isoform 3 of E3 ubiquitin-protein ligase TRIP12
Q14671-3	PUM1	9.80129					ü						PUM1_HUMAN Isoform 3 of Pumilio homolog 1
Q14677-3	CLINT1	11.3631		ü			ü			ü			EPN4_HUMAN Isoform 3 of Clathrin interactor 1
Q14680	MELK	5.10493			ü					ü			MELK_HUMAN Maternal embryonic leucine zipper kinase
Q14687	GSE1	2.36529											GSE1_HUMAN Genetic suppressor element 1
Q14690	PDCD11	5.94619					ü			ü			RRP5_HUMAN Protein RRP5 homolog
Q14692	BMS1	8.69259								ü			BMS1_HUMAN Ribosome biogenesis protein BMS1 homolog
Q14694-2	USP10	10.4374								ü			UBP10_HUMAN Isoform 2 of Ubiquitin carboxyl-terminal hydrolase 10
Q14696	MESDC2	15.5345			ü								MESD_HUMAN LDLR chaperone MESD
Q14697-2	GANAB	14.3836	ü	ü									GANAB_HUMAN Isoform 2 of Neutral alpha-glucosidase AB
Q14738	PPP2R5D	10.3178					ü			ü			2A5D_HUMAN Serine/threonine-protein phosphatase 2A 56 kDa regulatory subunit delta isoform
Q14739	LBR	15.1144								ü			LBR_HUMAN Lamin-B receptor
Q14789-2	GOLGB1	14.565		ü									GOGB1_HUMAN Isoform 2 of Golgin subfamily B member 1
Q14807	KIF22	3.38137					ü	ü		ü			KIF22_HUMAN Kinesin-like protein KIF22
Q14839-2	CHD4	9.45115						ü		ü			CHD4_HUMAN Isoform 2 of Chromodomain-helicase-DNA-binding protein 4
Q14847	LASP1	12.1158	ü					ü					LASP1_HUMAN LIM and SH3 domain protein 1
Q14847-2	LASP1	10.5118	ü					ü					LASP1_HUMAN Isoform 2 of LIM and SH3 domain protein 1
Q14865	ARID5B	1.64984								ü			ARI5B_HUMAN AT-rich interactive domain-containing protein 5B
Q14919-2	DRAP1	4.1688								ü			NC2A_HUMAN Isoform 2 of Dr1-associated corepressor
Q14966	ZNF638	10.8406								ü			ZN638_HUMAN Zinc finger protein 638
Q14974	KPNB1	15.0947	ü				ü			ü			IMB1_HUMAN Importin subunit beta-1
Q14978-2	NOLC1	12.1669								ü			NOLC1_HUMAN Isoform Beta of Nucleolar and coiled-body phosphoprotein 1
Q14980	NUMA1	11.9385	ü	ü	ü		ü	ü		ü			NUMA1_HUMAN Nuclear mitotic apparatus protein 1
Q14C86-6	GAPVD1	12.1349			ü		ü						GAPD1_HUMAN Isoform 6 of GTPase-activating protein and VPS9 domain-containing protein 1
Q14CX7	NAA25	18.7489		ü						ü			NAA25_HUMAN N-alpha-acetyltransferase 25, NatB auxiliary subunit
Q15003	NCAPH	3.96379					ü			ü			CND2_HUMAN Condensin complex subunit 2
Q15004	KIAA0101	2.53297								ü			PAF15_HUMAN PCNA-associated factor
Q15005	SPCS2	7.01495											SPCS2_HUMAN Signal peptidase complex subunit 2
Q15006	EMC2	13.4019				ü				ü			EMC2_HUMAN ER membrane protein complex subunit 2
Q15007	WTAP	5.90818								ü			FL2D_HUMAN Pre-mRNA-splicing regulator WTAP
Q15008	PSMD6	1.83154	ü				ü			ü	ü		PSMD6_HUMAN 26S proteasome non-ATPase regulatory subunit 6
Q15014	MORF4L2	2.95989			ü					ü			MO4L2_HUMAN Mortality factor 4-like protein 2
Q15019-2	SEPT2	3.83357	ü		ü			ü		ü			SEPT2_HUMAN Isoform 2 of Septin-2
Q15020	SART3	12.7417								ü			SART3_HUMAN Squamous cell carcinoma antigen recognized by T-cells 3
Q15031	LARS2	8.93116				ü	ü						SYLM_HUMAN Probable leucine--tRNA ligase, mitochondrial
Q15041	ARL6IP1	8.81642			ü		ü						AR6P1_HUMAN ADP-ribosylation factor-like protein 6-interacting protein 1
Q15046-2	KARS	11.8852			ü	ü	ü	ü		ü			SYK_HUMAN Isoform Mitochondrial of Lysine--tRNA ligase
Q15047	SETDB1	4.34439			ü					ü			SETB1_HUMAN Histone-lysine N-methyltransferase SETDB1
Q15054	POLD3	9.43186				ü				ü			DPOD3_HUMAN DNA polymerase delta subunit 3
Q15058	KIF14	7.682			ü		ü	ü		ü			KIF14_HUMAN Kinesin-like protein KIF14
Q15061	WDR43	4.68754						ü		ü			WDR43_HUMAN WD repeat-containing protein 43
Q15070	OXA1L	8.73201				ü							OXA1L_HUMAN Mitochondrial inner membrane protein OXA1L
Q15075	EEA1	12.0192	ü		ü		ü						EEA1_HUMAN Early endosome antigen 1
Q15084-2	PDIA6	15.2073	ü		ü								PDIA6_HUMAN Isoform 2 of Protein disulfide-isomerase A6
Q15120-2	PDK3	7.97913				ü							PDK3_HUMAN Isoform 2 of [Pyruvate dehydrogenase (acetyl-transferring)] kinase isozyme 3, mitochondrial
Q15149	PLEC	8.11078	ü		ü		ü	ü					PLEC_HUMAN Plectin
Q15149-4	PLEC	9.93048	ü		ü		ü	ü					PLEC_HUMAN Isoform 4 of Plectin
Q15172	PPP2R5A	12.9102			ü					ü			2A5A_HUMAN Serine/threonine-protein phosphatase 2A 56 kDa regulatory subunit alpha isoform
Q15173	PPP2R5B	11.6593					ü						2A5B_HUMAN Serine/threonine-protein phosphatase 2A 56 kDa regulatory subunit beta isoform
Q15181	PPA1	13.3042	ü				ü						IPYR_HUMAN Inorganic pyrophosphatase
Q15185	PTGES3	18.2167	ü				ü			ü			TEBP_HUMAN Prostaglandin E synthase 3
Q15198	PDGFRL	0.929214											PGFRL_HUMAN Platelet-derived growth factor receptor-like protein
Q15208	STK38	5.28032								ü			STK38_HUMAN Serine/threonine-protein kinase 38
Q15233	NONO	9.74069								ü			NONO_HUMAN Non-POU domain-containing octamer-binding protein
Q15257	PPP2R4	11.7982	ü							ü			PTPA_HUMAN Serine/threonine-protein phosphatase 2A activator
Q15286	RAB35	14.2917	ü	ü	ü	ü							RAB35_HUMAN Ras-related protein Rab-35
Q15287	RNPS1	9.14804					ü			ü			RNPS1_HUMAN RNA-binding protein with serine-rich domain 1
Q15334	LLGL1	13.5064		ü	ü			ü					L2GL1_HUMAN Lethal(2) giant larvae protein homolog 1
Q15349-2	RPS6KA2	15.7498					ü	ü		ü		ü	KS6A2_HUMAN Isoform 2 of Ribosomal protein S6 kinase alpha-2
Q15363	TMED2	13.4566		ü	ü								TMED2_HUMAN Transmembrane emp24 domain-containing protein 2
Q15365	PCBP1	13.9747	ü							ü			PCBP1_HUMAN Poly(rC)-binding protein 1
Q15366-2	PCBP2	10.6067	ü				ü			ü			PCBP2_HUMAN Isoform 2 of Poly(rC)-binding protein 2
Q15369	TCEB1	13.2406					ü			ü			ELOC_HUMAN Transcription elongation factor B polypeptide 1
Q15370-2	TCEB2	4.92467	ü				ü			ü			ELOB_HUMAN Isoform 2 of Transcription elongation factor B polypeptide 2
Q15382	RHEB	38.9409	ü	ü			ü		ü	ü			RHEB_HUMAN GTP-binding protein Rheb
Q15386	UBE3C	10.5711								ü	ü		UBE3C_HUMAN Ubiquitin-protein ligase E3C
Q15388	TOMM20	9.66598				ü							TOM20_HUMAN Mitochondrial import receptor subunit TOM20 homolog
Q15392	DHCR24	7.56794		ü	ü		ü	ü		ü			DHC24_HUMAN Delta(24)-sterol reductase
Q15398	DLGAP5	4.62684						ü		ü			DLGP5_HUMAN Disks large-associated protein 5
Q15404	RSU1	11.7443	ü				ü						RSU1_HUMAN Ras suppressor protein 1
Q15424-3	SAFB	9.69979								ü			SAFB1_HUMAN Isoform 3 of Scaffold attachment factor B1
Q15427	SF3B4	4.39563								ü			SF3B4_HUMAN Splicing factor 3B subunit 4
Q15428	SF3A2	10.4358								ü			SF3A2_HUMAN Splicing factor 3A subunit 2
Q15435	PPP1R7	9.53173	ü							ü			PP1R7_HUMAN Protein phosphatase 1 regulatory subunit 7
Q15459	SF3A1	10.8152								ü			SF3A1_HUMAN Splicing factor 3A subunit 1
Q15465	SHH	4.88717			ü		ü						SHH_HUMAN Sonic hedgehog protein
Q15526	SURF1	8.92081				ü							SURF1_HUMAN Surfeit locus protein 1
Q15527	SURF2	9.24936			ü					ü			SURF2_HUMAN Surfeit locus protein 2
Q15554-3	TERF2	8.07017		ü						ü			TERF2_HUMAN Isoform 3 of Telomeric repeat-binding factor 2
Q15555	MAPRE2	12.7793						ü					MARE2_HUMAN Microtubule-associated protein RP/EB family member 2
Q15596	NCOA2	1.58768								ü			NCOA2_HUMAN Nuclear receptor coactivator 2
Q15599	SLC9A3R2	13.3838	ü		ü					ü			NHRF2_HUMAN Na(+)/H(+) exchange regulatory cofactor NHE-RF2
Q15629	TRAM1	9.43314											TRAM1_HUMAN Translocating chain-associated membrane protein 1
Q15631	TSN	7.37783					ü			ü			TSN_HUMAN Translin
Q15637-5	SF1	10.9954								ü		ü	SF01_HUMAN Isoform 5 of Splicing factor 1
Q15643	TRIP11	16.7023		ü				ü		ü			TRIPB_HUMAN Thyroid receptor-interacting protein 11
Q15649	ZNHIT3	3.64201											ZNHI3_HUMAN Zinc finger HIT domain-containing protein 3
Q15691	MAPRE1	10.9467		ü	ü		ü	ü					MARE1_HUMAN Microtubule-associated protein RP/EB family member 1
Q15717	ELAVL1	11.8083					ü			ü			ELAV1_HUMAN ELAV-like protein 1
Q15738	NSDHL	10.4768											NSDHL_HUMAN Sterol-4-alpha-carboxylate 3-dehydrogenase, decarboxylating
Q15742	NAB2	9.63641								ü			NAB2_HUMAN NGFI-A-binding protein 2
Q15758	SLC1A5	10.439	ü	ü	ü								AAAT_HUMAN Neutral amino acid transporter B(0)
Q15771	RAB30	15.7355		ü									RAB30_HUMAN Ras-related protein Rab-30
Q15785	TOMM34	6.28306				ü				ü			TOM34_HUMAN Mitochondrial import receptor subunit TOM34
Q15813	TBCE	16.1573						ü					TBCE_HUMAN Tubulin-specific chaperone E
Q15819	UBE2V2	13.5195	ü							ü			UB2V2_HUMAN Ubiquitin-conjugating enzyme E2 variant 2
Q15833	STXBP2	9.75302	ü		ü		ü		ü				STXB2_HUMAN Syntaxin-binding protein 2
Q15843	NEDD8	13.2634	ü				ü			ü			NEDD8_HUMAN NEDD8
Q15907	RAB11B	15.6361	ü		ü	ü		ü					RB11B_HUMAN Ras-related protein Rab-11B
Q15911	ZFHX3	12.3073								ü			ZFHX3_HUMAN Zinc finger homeobox protein 3
Q16181	SEPT7	6.05157	ü				ü	ü		ü			SEPT7_HUMAN Septin-7
Q16186	ADRM1	12.0926			ü					ü	ü		ADRM1_HUMAN Proteasomal ubiquitin receptor ADRM1
Q16342	PDCD2	6.85334	ü							ü			PDCD2_HUMAN Programmed cell death protein 2
Q16394	EXT1	13.012		ü									EXT1_HUMAN Exostosin-1
Q16401	PSMD5	16.0265					ü			ü	ü		PSMD5_HUMAN 26S proteasome non-ATPase regulatory subunit 5
Q16512-2	PKN1	9.12036			ü		ü			ü			PKN1_HUMAN Isoform 2 of Serine/threonine-protein kinase N1
Q16513	PKN2	9.6903			ü		ü	ü		ü			PKN2_HUMAN Serine/threonine-protein kinase N2
Q16514	TAF12	4.81687								ü			TAF12_HUMAN Transcription initiation factor TFIID subunit 12
Q16537	PPP2R5E	7.77681											2A5E_HUMAN Serine/threonine-protein phosphatase 2A 56 kDa regulatory subunit epsilon isoform
Q16543	CDC37	14.003	ü				ü						CDC37_HUMAN Hsp90 co-chaperone Cdc37
Q16576-2	RBBP7	11.3056								ü			RBBP7_HUMAN Isoform 2 of Histone-binding protein RBBP7
Q16625	OCLN	9.16498			ü								OCLN_HUMAN Occludin
Q16629	SRSF7	10.9415	ü							ü			SRSF7_HUMAN Serine/arginine-rich splicing factor 7
Q16630-2	CPSF6	22.0677								ü			CPSF6_HUMAN Isoform 2 of Cleavage and polyadenylation specificity factor subunit 6
Q16658	FSCN1	12.6325	ü				ü	ü					FSCN1_HUMAN Fascin
Q16698	DECR1	4.22831	ü			ü				ü			DECR_HUMAN 2,4-dienoyl-CoA reductase, mitochondrial
Q16706	MAN2A1	6.61779	ü	ü	ü								MA2A1_HUMAN Alpha-mannosidase 2
Q16718	NDUFA5	7.35981				ü							NDUA5_HUMAN NADH dehydrogenase [ubiquinone] 1 alpha subcomplex subunit 5
Q16739	UGCG	3.44969		ü									CEGT_HUMAN Ceramide glucosyltransferase
Q16762	TST	10.0224	ü			ü							THTR_HUMAN Thiosulfate sulfurtransferase
Q16763	UBE2S	4.83063								ü			UBE2S_HUMAN Ubiquitin-conjugating enzyme E2 S
Q16774-2	GUK1	14.3301					ü						KGUA_HUMAN Isoform 2 of Guanylate kinase
Q16795	NDUFA9	9.299				ü				ü			NDUA9_HUMAN NADH dehydrogenase [ubiquinone] 1 alpha subcomplex subunit 9, mitochondrial
Q16836-2	HADH	13.3221				ü				ü			HCDH_HUMAN Isoform 2 of Hydroxyacyl-coenzyme A dehydrogenase, mitochondrial
Q16850	CYP51A1	10.1605			ü								CP51A_HUMAN Lanosterol 14-alpha demethylase
Q16864-2	ATP6V1F	4.29699	ü				ü						VATF_HUMAN Isoform 2 of V-type proton ATPase subunit F
Q16881	TXNRD1	7.75679	ü			ü	ü			ü			TRXR1_HUMAN Thioredoxin reductase 1, cytoplasmic
Q16891	IMMT	14.4556				ü							IMMT_HUMAN Mitochondrial inner membrane protein
Q17RS7	GEN1	4.78825	ü					ü		ü			GEN_HUMAN Flap endonuclease GEN homolog 1
Q1ED39	KNOP1	8.92886								ü			KNOP1_HUMAN Lysine-rich nucleolar protein 1
Q1KMD3	HNRNPUL2	15.9015								ü			HNRL2_HUMAN Heterogeneous nuclear ribonucleoprotein U-like protein 2
Q1MSJ5	CSPP1	5.16234						ü					CSPP1_HUMAN Centrosome and spindle pole-associated protein 1
Q27J81	INF2	9.40498											INF2_HUMAN Inverted formin-2
Q29RF7	PDS5A	11.1654			ü		ü			ü			PDS5A_HUMAN Sister chromatid cohesion protein PDS5 homolog A
Q2NKX8	ERCC6L	11.1313					ü	ü		ü			ERC6L_HUMAN DNA excision repair protein ERCC-6-like
Q2NL82	TSR1	7.89641					ü			ü			TSR1_HUMAN Pre-rRNA-processing protein TSR1 homolog
Q2PPJ7	RALGAPA2	2.76849			ü								RGPA2_HUMAN Ral GTPase-activating protein subunit alpha-2
Q2TAY7	SMU1	8.41913								ü			SMU1_HUMAN WD40 repeat-containing protein SMU1
Q2VIQ3	KIF4B	7.78467					ü	ü		ü			KIF4B_HUMAN Chromosome-associated kinesin KIF4B
Q3B726	TWISTNB	14.2126						ü		ü			RPA43_HUMAN DNA-directed RNA polymerase I subunit RPA43
Q3KQU3	MAP7D1	8.82203						ü					MA7D1_HUMAN MAP7 domain-containing protein 1
Q3LXA3	DAK	5.69086	ü				ü			ü			DHAK_HUMAN Bifunctional ATP-dependent dihydroxyacetone kinase/FAD-AMP lyase (cyclizing)
Q3MIW9	DPCR1	4.46328			ü								DPCR1_HUMAN Diffuse panbronchiolitis critical region protein 1
Q3T8J9	GON4L	5.48116								ü			GON4L_HUMAN GON-4-like protein
Q3YEC7-2	RABL6	9.34287								ü			RABL6_HUMAN Isoform 2 of Rab-like protein 6
Q3ZAQ7	VMA21	15.3013							ü				VMA21_HUMAN Vacuolar ATPase assembly integral membrane protein VMA21
Q3ZCQ8-2	TIMM50	14.0484				ü				ü			TIM50_HUMAN Isoform 2 of Mitochondrial import inner membrane translocase subunit TIM50
Q460N5	PARP14	11.7822								ü			PAR14_HUMAN Poly [ADP-ribose] polymerase 14
Q49A26	GLYR1	7.22329		ü						ü			GLYR1_HUMAN Putative oxidoreductase GLYR1
Q49B96	COX19	5.82672				ü	ü						COX19_HUMAN Cytochrome c oxidase assembly protein COX19
Q4G176	ACSF3	12.4644				ü							ACSF3_HUMAN Acyl-CoA synthetase family member 3, mitochondrial
Q4KMP7	TBC1D10B	11.516			ü		ü						TB10B_HUMAN TBC1 domain family member 10B
Q4KMQ1	TPRN	11.3333											TPRN_HUMAN Taperin
Q4LE39	ARID4B	7.88384								ü			ARI4B_HUMAN AT-rich interactive domain-containing protein 4B
Q4U2R6	MRPL51	4.65825				ü						ü	RM51_HUMAN 39S ribosomal protein L51, mitochondrial
Q4VC05-2	BCL7A	9.53173											BCL7A_HUMAN Isoform 2 of B-cell CLL/lymphoma 7 protein family member A
Q4ZG55	GREB1	3.65584	ü										GREB1_HUMAN Protein GREB1
Q52LJ0-2	FAM98B	10.1397								ü			FA98B_HUMAN Isoform 2 of Protein FAM98B
Q53F19	C17orf85	10.3687								ü			CQ085_HUMAN Uncharacterized protein C17orf85
Q53FV1	ORMDL2	8.40586											ORML2_HUMAN ORM1-like protein 2
Q53GA4	PHLDA2	2.22163											PHLA2_HUMAN Pleckstrin homology-like domain family A member 2
Q53GQ0	HSD17B12	11.1997											DHB12_HUMAN Estradiol 17-beta-dehydrogenase 12
Q53GS9	USP39	12.7722								ü			SNUT2_HUMAN U4/U6.U5 tri-snRNP-associated protein 2
Q53H12	AGK	13.7666				ü							AGK_HUMAN Acylglycerol kinase, mitochondrial
Q53H82	LACTB2	11.6613				ü							LACB2_HUMAN Beta-lactamase-like protein 2
Q53HC0	CCDC92	4.13967						ü					CCD92_HUMAN Coiled-coil domain-containing protein 92
Q53SF7	COBLL1	9.6057	ü										COBL1_HUMAN Cordon-bleu protein-like 1
Q53T94	TAF1B	2.00285	ü							ü			TAF1B_HUMAN TATA box-binding protein-associated factor RNA polymerase I subunit B
Q562F6	SGOL2	5.23723					ü			ü			SGOL2_HUMAN Shugoshin-like 2
Q562R1	ACTBL2	12.4309	ü					ü					ACTBL_HUMAN Beta-actin-like protein 2
Q56A73	SPIN4	3.21721											SPIN4_HUMAN Spindlin-4
Q56NI9	ESCO2	4.41636		ü						ü			ESCO2_HUMAN N-acetyltransferase ESCO2
Q56VL3	OCIAD2	12.6857				ü							OCAD2_HUMAN OCIA domain-containing protein 2
Q5BJF6	ODF2	2.31985			ü		ü	ü		ü			ODFP2_HUMAN Outer dense fiber protein 2
Q5BKY9	FAM133B	8.63735											F133B_HUMAN Protein FAM133B
Q5CZC0	FSIP2	11.5563				ü							FSIP2_HUMAN Fibrous sheath-interacting protein 2
Q5D1E8	ZC3H12A	4.67206						ü		ü			ZC12A_HUMAN Ribonuclease ZC3H12A
Q5EBL8-2	PDZD11	5.40592			ü		ü						PDZ11_HUMAN Isoform 2 of PDZ domain-containing protein 11
Q5F1R6-2	DNAJC21	9.43571								ü		ü	DJC21_HUMAN Isoform 2 of DnaJ homolog subfamily C member 21
Q5H9R7-5	PPP6R3	8.67953		ü	ü		ü			ü			PP6R3_HUMAN Isoform 5 of Serine/threonine-protein phosphatase 6 regulatory subunit 3
Q5HYI7	MTX3	10.9088				ü							MTX3_HUMAN Metaxin-3
Q5HYJ3	FAM76B	16.4448								ü			FA76B_HUMAN Protein FAM76B
Q5HYK3	COQ5	4.54017				ü							COQ5_HUMAN 2-methoxy-6-polyprenyl-1,4-benzoquinol methylase, mitochondrial
Q5J8M3	EMC4	9.68218											EMC4_HUMAN ER membrane protein complex subunit 4
Q5JPE7	NOMO2	7.58533											NOMO2_HUMAN Nodal modulator 2
Q5JPI3	C3orf38	6.76769											CC038_HUMAN Uncharacterized protein C3orf38
Q5JRX3-2	PITRM1	11.6241				ü							PREP_HUMAN Isoform 2 of Presequence protease, mitochondrial
Q5JSZ5	PRRC2B	7.26037											PRC2B_HUMAN Protein PRRC2B
Q5JTH9	RRP12	10.8883								ü			RRP12_HUMAN RRP12-like protein
Q5JTV8	TOR1AIP1	13.0217								ü			TOIP1_HUMAN Torsin-1A-interacting protein 1
Q5JVF3-4	PCID2	10.3548								ü			PCID2_HUMAN Isoform 4 of PCI domain-containing protein 2
Q5JXB2	UBE2NL	11.0762	ü							ü			UE2NL_HUMAN Putative ubiquitin-conjugating enzyme E2 N-like
Q5M775	SPECC1	9.10957						ü		ü			CYTSB_HUMAN Cytospin-B
Q5MIZ7	SMEK2	10.8934						ü		ü			P4R3B_HUMAN Serine/threonine-protein phosphatase 4 regulatory subunit 3B
Q5PRF9	SAMD4B	12.1286								ü			SMAG2_HUMAN Protein Smaug homolog 2
Q5QNW6-2	HIST2H2BF	19.032	ü							ü			H2B2F_HUMAN Isoform 2 of Histone H2B type 2-F
Q5SGD2	PPM1L	7.97179	ü										PPM1L_HUMAN Protein phosphatase 1L
Q5SRE5	NUP188	4.063								ü			NU188_HUMAN Nucleoporin NUP188 homolog
Q5SSJ5	HP1BP3	12.1583								ü			HP1B3_HUMAN Heterochromatin protein 1-binding protein 3
Q5STZ8	ABCF1	41.1608					ü			ü		ü	Q5STZ8_HUMAN ATP-binding cassette sub-family F member 1 (Fragment)
Q5SW96	LDLRAP1	8.30912		ü	ü		ü	ü					ARH_HUMAN Low density lipoprotein receptor adapter protein 1
Q5SWX8	ODR4	4.76292											ODR4_HUMAN Protein odr-4 homolog
Q5T0D9	TPRG1L	5.20615	ü										TPRGL_HUMAN Tumor protein p63-regulated gene 1-like protein
Q5T0N5	FNBP1L	10.0529	ü	ü	ü			ü					FBP1L_HUMAN Formin-binding protein 1-like
Q5T0W9	FAM83B	13.3812											FA83B_HUMAN Protein FAM83B
Q5T1J5	CHCHD2P9	1.33226				ü				ü			CHCH9_HUMAN Putative coiled-coil-helix-coiled-coil-helix domain-containing protein CHCHD2P9, mitochondrial
Q5T2T1	MPP7	11.101											MPP7_HUMAN MAGUK p55 subfamily member 7
Q5T3I0-3	GPATCH4	7.00786											GPTC4_HUMAN Isoform 3 of G patch domain-containing protein 4
Q5T3J3	LRIF1	8.01975						ü		ü			LRIF1_HUMAN Ligand-dependent nuclear receptor-interacting factor 1
Q5T4F4-3	ZFYVE27	9.73385			ü								ZFY27_HUMAN Isoform 3 of Protrudin
Q5T5P2	KIAA1217	8.91164											SKT_HUMAN Sickle tail protein homolog
Q5T5U3	ARHGAP21	12.5185		ü	ü			ü					RHG21_HUMAN Rho GTPase-activating protein 21
Q5T5Y3-3	CAMSAP1	10.7531						ü					CAMP1_HUMAN Isoform 3 of Calmodulin-regulated spectrin-associated protein 1
Q5T6V5	C9orf64	13.772											CI064_HUMAN UPF0553 protein C9orf64
Q5T8D3	ACBD5	11.4042								ü			ACBD5_HUMAN Acyl-CoA-binding domain-containing protein 5
Q5T8I3	FAM102B	6.58635											F102B_HUMAN Protein FAM102B
Q5T8P6	RBM26	8.01697											RBM26_HUMAN RNA-binding protein 26
Q5T9A4	ATAD3B	11.1834			ü	ü							ATD3B_HUMAN ATPase family AAA domain-containing protein 3B
Q5TFE4	NT5DC1	37.1462											NT5D1_HUMAN 5'-nucleotidase domain-containing protein 1
Q5TGZ0	MINOS1	11.2725				ü							MOS1_HUMAN Mitochondrial inner membrane organizing system protein 1
Q5TH69	ARFGEF3	12.6394											BIG3_HUMAN Brefeldin A-inhibited guanine nucleotide-exchange protein 3
Q5U5X0	LYRM7	12.3953				ü							LYRM7_HUMAN Complex III assembly factor LYRM7
Q5UCC4	EMC10	9.74069											EMC10_HUMAN ER membrane protein complex subunit 10
Q5UIP0	RIF1	9.26667			ü			ü		ü			RIF1_HUMAN Telomere-associated protein RIF1
Q5VIR6-4	VPS53	5.06464		ü	ü		ü						VPS53_HUMAN Isoform 4 of Vacuolar protein sorting-associated protein 53 homolog
Q5VSL9	STRIP1	6.70744	ü		ü					ü			STRP1_HUMAN Striatin-interacting protein 1
Q5VT06	CEP350	6.48953						ü		ü			CE350_HUMAN Centrosome-associated protein 350
Q5VT52	RPRD2	10.0851								ü			RPRD2_HUMAN Regulation of nuclear pre-mRNA domain-containing protein 2
Q5VTE0	EEF1A1P5	11.8568	ü							ü			EF1A3_HUMAN Putative elongation factor 1-alpha-like 3
Q5VTQ0	TTC39B	7.32559											TT39B_HUMAN Tetratricopeptide repeat protein 39B
Q5VV41	ARHGEF16	11.922			ü		ü						ARHGG_HUMAN Rho guanine nucleotide exchange factor 16
Q5VV42	CDKAL1	7.48377											CDKAL_HUMAN Threonylcarbamoyladenosine tRNA methylthiotransferase
Q5VW32	BROX	10.523	ü										BROX_HUMAN BRO1 domain-containing protein BROX
Q5VW38	GPR107	9.38842		ü									GP107_HUMAN Protein GPR107
Q5VWG9	TAF3	6.59826								ü			TAF3_HUMAN Transcription initiation factor TFIID subunit 3
Q5VWQ0	RSBN1	8.76625								ü			RSBN1_HUMAN Round spermatid basic protein 1
Q5VWZ2	LYPLAL1	11.9179	ü				ü						LYPL1_HUMAN Lysophospholipase-like protein 1
Q5VX52	SPATA1	10.7166											SPAT1_HUMAN Spermatogenesis-associated protein 1
Q5VYK3	ECM29	10.7598		ü				ü		ü	ü		ECM29_HUMAN Proteasome-associated protein ECM29 homolog
Q5VZE5	NAA35	8.18839											NAA35_HUMAN N-alpha-acetyltransferase 35, NatC auxiliary subunit
Q5XKP0	QIL1	13.3426				ü							QIL1_HUMAN Protein QIL1
Q66K64	DCAF15	4.36546											DCA15_HUMAN DDB1- and CUL4-associated factor 15
Q66K79	CPZ	7.27637	ü										CBPZ_HUMAN Carboxypeptidase Z
Q676U5	ATG16L1	5.21516			ü		ü	ü					A16L1_HUMAN Autophagy-related protein 16-1
Q68D10	SPTY2D1	6.96211								ü			SPT2_HUMAN Protein SPT2 homolog
Q69YH5	CDCA2	4.3575								ü			CDCA2_HUMAN Cell division cycle-associated protein 2
Q69YQ0	SPECC1L	8.9751						ü					CYTSA_HUMAN Cytospin-A
Q69YU5	C12orf73	14.0569											CL073_HUMAN Uncharacterized protein C12orf73
Q6AI08	HEATR6	6.01534											HEAT6_HUMAN HEAT repeat-containing protein 6
Q6DD87	ZNF787	10.7132								ü			ZN787_HUMAN Zinc finger protein 787
Q6DD88	ATL3	13.0389											ATLA3_HUMAN Atlastin-3
Q6DKI1	RPL7L1	8.98208					ü			ü		ü	RL7L_HUMAN 60S ribosomal protein L7-like 1
Q6DN03	HIST2H2BC	23.8852								ü			H2B2C_HUMAN Putative histone H2B type 2-C
Q6DN90	IQSEC1	6.14656								ü			IQEC1_HUMAN IQ motif and SEC7 domain-containing protein 1
Q6GQQ9	OTUD7B	10.2038								ü			OTU7B_HUMAN OTU domain-containing protein 7B
Q6H3X3	RAET1G	5.59441			ü								RET1G_HUMAN Retinoic acid early transcript 1G protein
Q6I9Y2	THOC7	0.792177								ü			THOC7_HUMAN THO complex subunit 7 homolog
Q6IAA8	LAMTOR1	9.6057	ü	ü	ü				ü				LTOR1_HUMAN Ragulator complex protein LAMTOR1
Q6IAN0	DHRS7B	10.9832											DRS7B_HUMAN Dehydrogenase/reductase SDR family member 7B
Q6IBS0	TWF2	14.9289	ü					ü					TWF2_HUMAN Twinfilin-2
Q6IN85	SMEK1	12.702						ü		ü			P4R3A_HUMAN Serine/threonine-protein phosphatase 4 regulatory subunit 3A
Q6IPM2	IQCE	1.5348			ü	ü							IQCE_HUMAN IQ domain-containing protein E
Q6IQ22	RAB12	10.4626		ü					ü				RAB12_HUMAN Ras-related protein Rab-12
Q6IQ23-2	PLEKHA7	8.48094	ü					ü		ü			PKHA7_HUMAN Isoform 2 of Pleckstrin homology domain-containing family A member 7
Q6ISB3	GRHL2	6.24063								ü			GRHL2_HUMAN Grainyhead-like protein 2 homolog
Q6KCM7-3	SLC25A25	6.95163	ü			ü							SCMC2_HUMAN Isoform 3 of Calcium-binding mitochondrial carrier protein SCaMC-2
Q6N021	TET2	5.75704								ü			TET2_HUMAN Methylcytosine dioxygenase TET2
Q6NS38	ALKBH2	4.82089						ü		ü			ALKB2_HUMAN Alpha-ketoglutarate-dependent dioxygenase alkB homolog 2
Q6NUK1	SLC25A24	16.5706				ü							SCMC1_HUMAN Calcium-binding mitochondrial carrier protein SCaMC-1
Q6NUM9	RETSAT	11.7682								ü			RETST_HUMAN All-trans-retinol 13,14-reductase
Q6NUQ4	TMEM214	9.09403		ü				ü					TM214_HUMAN Transmembrane protein 214
Q6NV74	KIAA1211L	7.87846											K121L_HUMAN Uncharacterized protein KIAA1211-like
Q6NVY1	HIBCH	14.5619	ü			ü							HIBCH_HUMAN 3-hydroxyisobutyryl-CoA hydrolase, mitochondrial
Q6NW34	C3orf17	13.6796								ü			CC017_HUMAN Uncharacterized protein C3orf17
Q6NXG1	ESRP1	6.58635								ü			ESRP1_HUMAN Epithelial splicing regulatory protein 1
Q6NXR4	TTI2	9.10957											TTI2_HUMAN TELO2-interacting protein 2
Q6P0N0	MIS18BP1	4.58552								ü			M18BP_HUMAN Mis18-binding protein 1
Q6P1A2	LPCAT3	9.83466			ü								MBOA5_HUMAN Lysophospholipid acyltransferase 5
Q6P1J9	CDC73	7.70763								ü			CDC73_HUMAN Parafibromin
Q6P1M3	LLGL2	9.49257			ü			ü		ü			L2GL2_HUMAN Lethal(2) giant larvae protein homolog 2
Q6P1N0	CC2D1A	7.77158	ü		ü			ü		ü			C2D1A_HUMAN Coiled-coil and C2 domain-containing protein 1A
Q6P1N9	TATDN1	11.539								ü			TATD1_HUMAN Putative deoxyribonuclease TATDN1
Q6P1R4	DUS1L	6.03524					ü						DUS1L_HUMAN tRNA-dihydrouridine(16/17) synthase [NAD(P)(+)]-like
Q6P2C8	MED27	3.91078								ü			MED27_HUMAN Mediator of RNA polymerase II transcription subunit 27
Q6P2H3	CEP85	5.43432		ü				ü		ü			CEP85_HUMAN Centrosomal protein of 85 kDa
Q6P2I3	FAHD2B	10.7381											FAH2B_HUMAN Fumarylacetoacetate hydrolase domain-containing protein 2B
Q6P2Q9	PRPF8	4.33732								ü			PRP8_HUMAN Pre-mRNA-processing-splicing factor 8
Q6P3W7	SCYL2	14.676		ü	ü								SCYL2_HUMAN SCY1-like protein 2
Q6P3X3	TTC27	11.6105											TTC27_HUMAN Tetratricopeptide repeat protein 27
Q6P996	PDXDC1	10.6344		ü									PDXD1_HUMAN Pyridoxal-dependent decarboxylase domain-containing protein 1
Q6PD62	CTR9	10.902								ü			CTR9_HUMAN RNA polymerase-associated protein CTR9 homolog
Q6PH85	DCUN1D2	11.0921											DCNL2_HUMAN DCN1-like protein 2
Q6PI48	DARS2	7.59114				ü				ü			SYDM_HUMAN Aspartate--tRNA ligase, mitochondrial
Q6PII3	CCDC174	7.20377								ü			CC174_HUMAN Coiled-coil domain-containing protein 174
Q6PIU2-2	NCEH1	11.5911											NCEH1_HUMAN Isoform 2 of Neutral cholesterol ester hydrolase 1
Q6PJG2	ELMSAN1	6.58259								ü			EMSA1_HUMAN ELM2 and SANT domain-containing protein 1
Q6PJT7	ZC3H14	11.1099								ü			ZC3HE_HUMAN Zinc finger CCCH domain-containing protein 14
Q6PK04	CCDC137	8.34514								ü			CC137_HUMAN Coiled-coil domain-containing protein 137
Q6PKG0	LARP1	9.93048								ü			LARP1_HUMAN La-related protein 1
Q6PL18	ATAD2	5.35787	ü							ü			ATAD2_HUMAN ATPase family AAA domain-containing protein 2
Q6S8J3	POTEE	200	ü										POTEE_HUMAN POTE ankyrin domain family member E
Q6UB35	MTHFD1L	9.68895				ü	ü						C1TM_HUMAN Monofunctional C1-tetrahydrofolate synthase, mitochondrial
Q6UW56-3	ATRAID	5.05246			ü				ü	ü			ARAID_HUMAN Isoform 3 of All-trans retinoic acid-induced differentiation factor
Q6UWH4-2	FAM198B	10.8474		ü									F198B_HUMAN Isoform 2 of Protein FAM198B
Q6UWU4-2	C6orf89	7.57372		ü	ü					ü			CF089_HUMAN Isoform 2 of Bombesin receptor-activated protein C6orf89
Q6UXG2	KIAA1324	3.80203	ü	ü	ü				ü				K1324_HUMAN UPF0577 protein KIAA1324
Q6UXN9	WDR82	12.1201								ü			WDR82_HUMAN WD repeat-containing protein 82
Q6UXV4	APOOL	9.87671				ü							APOOL_HUMAN Apolipoprotein O-like
Q6W2J9	BCOR	3.42786				ü				ü			BCOR_HUMAN BCL-6 corepressor
Q6WKZ4	RAB11FIP1	11.2396			ü								RFIP1_HUMAN Rab11 family-interacting protein 1
Q6XE24	RBMS3	12.3953											RBMS3_HUMAN RNA-binding motif, single-stranded-interacting protein 3
Q6XZF7	DNMBP	12.2119		ü				ü					DNMBP_HUMAN Dynamin-binding protein
Q6Y1H2	PTPLB	11.2946											HACD2_HUMAN Very-long-chain (3R)-3-hydroxyacyl-[acyl-carrier protein] dehydratase 2
Q6Y7W6-3	GIGYF2	17.1997											PERQ2_HUMAN Isoform 2 of PERQ amino acid-rich with GYF domain-containing protein 2
Q6YN16	HSDL2	11.6086				ü							HSDL2_HUMAN Hydroxysteroid dehydrogenase-like protein 2
Q6ZMG9-2	CERS6	13.3323								ü			CERS6_HUMAN Isoform 2 of Ceramide synthase 6
Q6ZN55-2	ZNF574	9.67947								ü			ZN574_HUMAN Isoform 2 of Zinc finger protein 574
Q6ZNB6	NFXL1	10.6737								ü			NFXL1_HUMAN NF-X1-type zinc finger protein NFXL1
Q6ZRP7	QSOX2	12.0192		ü	ü					ü			QSOX2_HUMAN Sulfhydryl oxidase 2
Q6ZRV2	FAM83H	7.35357						ü					FA83H_HUMAN Protein FAM83H
Q6ZT07	TBC1D9	6.30879											TBCD9_HUMAN TBC1 domain family member 9
Q71RC2-4	LARP4	8.54155											LARP4_HUMAN Isoform 4 of La-related protein 4
Q71U36	TUBA1A	18.2744	ü		ü		ü	ü		ü			TBA1A_HUMAN Tubulin alpha-1A chain
Q71UM5	RPS27L	4.05278					ü			ü		ü	RS27L_HUMAN 40S ribosomal protein S27-like
Q76FK4	NOL8	7.76375								ü			NOL8_HUMAN Nucleolar protein 8
Q7KZF4	SND1	10.3687	ü			ü				ü			SND1_HUMAN Staphylococcal nuclease domain-containing protein 1
Q7KZI7	MARK2	7.91897			ü	ü		ü					MARK2_HUMAN Serine/threonine-protein kinase MARK2
Q7KZN9	COX15	9.60703				ü							COX15_HUMAN Cytochrome c oxidase assembly protein COX15 homolog
Q7L014	DDX46	14.5071								ü			DDX46_HUMAN Probable ATP-dependent RNA helicase DDX46
Q7L0Y3	TRMT10C	13.5566				ü				ü			MRRP1_HUMAN Mitochondrial ribonuclease P protein 1
Q7L1Q6-3	BZW1	7.73343											BZW1_HUMAN Isoform 3 of Basic leucine zipper and W2 domain-containing protein 1
Q7L2E3-2	DHX30	9.55933				ü				ü			DHX30_HUMAN Isoform 2 of Putative ATP-dependent RNA helicase DHX30
Q7L2H7	EIF3M	6.25528					ü						EIF3M_HUMAN Eukaryotic translation initiation factor 3 subunit M
Q7L2J0	MEPCE	28.9898											MEPCE_HUMAN 7SK snRNA methylphosphate capping enzyme
Q7L2Z9	CENPQ	4.59952					ü	ü		ü			CENPQ_HUMAN Centromere protein Q
Q7L3B6	CDC37L1	13.4305											CD37L_HUMAN Hsp90 co-chaperone Cdc37-like 1
Q7L4I2	RSRC2	7.72481											RSRC2_HUMAN Arginine/serine-rich coiled-coil protein 2
Q7L590	MCM10	2.72121								ü			MCM10_HUMAN Protein MCM10 homolog
Q7L592	NDUFAF7	9.75302				ü							NDUF7_HUMAN NADH dehydrogenase [ubiquinone] complex I, assembly factor 7
Q7L7X3	TAOK1	9.70794	ü				ü						TAOK1_HUMAN Serine/threonine-protein kinase TAO1
Q7LBC6	KDM3B	8.2843								ü			KDM3B_HUMAN Lysine-specific demethylase 3B
Q7LBR1	CHMP1B	9.78883	ü				ü						CHM1B_HUMAN Charged multivesicular body protein 1b
Q7RTV0	PHF5A	9.96617								ü			PHF5A_HUMAN PHD finger-like domain-containing protein 5A
Q7Z2W4	ZC3HAV1	17.7275		ü					ü	ü			ZCCHV_HUMAN Zinc finger CCCH-type antiviral protein 1
Q7Z388	DPY19L4	6.66552								ü			D19L4_HUMAN Probable C-mannosyltransferase DPY19L4
Q7Z3J2	C16orf62	9.59772			ü								CP062_HUMAN UPF0505 protein C16orf62
Q7Z3K3	POGZ	4.22187								ü			POGZ_HUMAN Pogo transposable element with ZNF domain
Q7Z417	NUFIP2	5.62026								ü		ü	NUFP2_HUMAN Nuclear fragile X mental retardation-interacting protein 2
Q7Z460	CLASP1	11.3705	ü	ü	ü		ü	ü					CLAP1_HUMAN CLIP-associating protein 1
Q7Z478	DHX29	18.8766				ü				ü			DHX29_HUMAN ATP-dependent RNA helicase DHX29
Q7Z4H7	HAUS6	7.54816			ü		ü	ü		ü			HAUS6_HUMAN HAUS augmin-like complex subunit 6
Q7Z4V5-3	HDGFRP2	10.4737								ü			HDGR2_HUMAN Isoform 3 of Hepatoma-derived growth factor-related protein 2
Q7Z4W1	DCXR	8.19904	ü		ü			ü		ü			DCXR_HUMAN L-xylulose reductase
Q7Z5G4	GOLGA7	6.39199	ü	ü	ü								GOGA7_HUMAN Golgin subfamily A member 7
Q7Z5H4	VN1R5	4.84143			ü								VN1R5_HUMAN Vomeronasal type-1 receptor 5
Q7Z5L9	IRF2BP2	9.44857								ü			I2BP2_HUMAN Interferon regulatory factor 2-binding protein 2
Q7Z6B7	SRGAP1	10.4594			ü		ü						SRGP1_HUMAN SLIT-ROBO Rho GTPase-activating protein 1
Q7Z6E9	RBBP6	28.5011					ü	ü		ü			RBBP6_HUMAN E3 ubiquitin-protein ligase RBBP6
Q7Z6M2	FBXO33	8.54893											FBX33_HUMAN F-box only protein 33
Q7Z6Z7	HUWE1	11.9818	ü				ü			ü			HUWE1_HUMAN E3 ubiquitin-protein ligase HUWE1
Q7Z739	YTHDF3	8.9082											YTHD3_HUMAN YTH domain family protein 3
Q7Z7H5	TMED4	7.23309	ü										TMED4_HUMAN Transmembrane emp24 domain-containing protein 4
Q7Z7K0	CMC1	9.32527				ü							COXM1_HUMAN COX assembly mitochondrial protein homolog
Q86SF2	GALNT7	10.6654	ü	ü									GALT7_HUMAN N-acetylgalactosaminyltransferase 7
Q86SQ4-3	GPR126	10.304			ü								GP126_HUMAN Isoform 3 of G-protein coupled receptor 126
Q86SX6	GLRX5	6.24682				ü				ü			GLRX5_HUMAN Glutaredoxin-related protein 5, mitochondrial
Q86TN4-4	TRPT1	20.0738											TRPT1_HUMAN Isoform 4 of tRNA 2'-phosphotransferase 1
Q86U06	RBM23	2.70317								ü			RBM23_HUMAN Probable RNA-binding protein 23
Q86UE4	MTDH	13.1527			ü					ü			LYRIC_HUMAN Protein LYRIC
Q86UK7	ZNF598	11.8608											ZN598_HUMAN Zinc finger protein 598
Q86UP2	KTN1	16.0117			ü								KTN1_HUMAN Kinectin
Q86UQ4	ABCA13	17.6373			ü								ABCAD_HUMAN ATP-binding cassette sub-family A member 13
Q86UU0	BCL9L	7.53339								ü			BCL9L_HUMAN B-cell CLL/lymphoma 9-like protein
Q86V81	ALYREF	2.79879	ü				ü			ü			THOC4_HUMAN THO complex subunit 4
Q86VI3	IQGAP3	7.84725			ü		ü						IQGA3_HUMAN Ras GTPase-activating-like protein IQGAP3
Q86VM9	ZC3H18	9.09761								ü			ZCH18_HUMAN Zinc finger CCCH domain-containing protein 18
Q86VP6	CAND1	21.2296	ü	ü						ü			CAND1_HUMAN Cullin-associated NEDD8-dissociated protein 1
Q86VY4	TSPYL5	6.47196								ü			TSYL5_HUMAN Testis-specific Y-encoded-like protein 5
Q86W50	METTL16	12.2486								ü			MET16_HUMAN Methyltransferase-like protein 16
Q86W92	PPFIBP1	7.85703			ü								LIPB1_HUMAN Liprin-beta-1
Q86WA8	LONP2	6.5219								ü			LONP2_HUMAN Lon protease homolog 2, peroxisomal
Q86WJ1	CHD1L	12.4577			ü					ü			CHD1L_HUMAN Chromodomain-helicase-DNA-binding protein 1-like
Q86XL3	ANKLE2	7.77332											ANKL2_HUMAN Ankyrin repeat and LEM domain-containing protein 2
Q86XN7	PROSER1	9.16255											PRSR1_HUMAN Proline and serine-rich protein 1
Q86XP3	DDX42	10.9762								ü			DDX42_HUMAN ATP-dependent RNA helicase DDX42
Q86XR7-2	TICAM2	14.2506		ü	ü								TCAM2_HUMAN Isoform 2 of TIR domain-containing adapter molecule 2
Q86Y07	VRK2	9.63909				ü				ü			VRK2_HUMAN Serine/threonine-protein kinase VRK2
Q86Y37	CACUL1	9.43314								ü			CACL1_HUMAN CDK2-associated and cullin domain-containing protein 1
Q86Y56	HEATR2	7.04561											HEAT2_HUMAN HEAT repeat-containing protein 2
Q86Y82	STX12	21.3539	ü	ü			ü						STX12_HUMAN Syntaxin-12
Q86YB8	ERO1LB	14.8489											ERO1B_HUMAN ERO1-like protein beta
Q86YH6	PDSS2	11.4721				ü							DLP1_HUMAN Decaprenyl-diphosphate synthase subunit 2
Q86YP4-3	GATAD2A	7.17321								ü			P66A_HUMAN Isoform 3 of Transcriptional repressor p66-alpha
Q8IU81	IRF2BP1	11.216								ü			I2BP1_HUMAN Interferon regulatory factor 2-binding protein 1
Q8IUC4	RHPN2	4.17861					ü			ü			RHPN2_HUMAN Rhophilin-2
Q8IUD2	ERC1	10.5518		ü			ü						RB6I2_HUMAN ELKS/Rab6-interacting/CAST family member 1
Q8IUF8	MINA	8.99374					ü			ü			MINA_HUMAN Bifunctional lysine-specific demethylase and histidyl-hydroxylase MINA
Q8IV36	HID1	9.01479	ü	ü				ü					HID1_HUMAN Protein HID1
Q8IV48	ERI1	4.49541								ü			ERI1_HUMAN 3'-5' exoribonuclease 1
Q8IVD9	NUDCD3	10.8593											NUDC3_HUMAN NudC domain-containing protein 3
Q8IVF5-2	TIAM2	5.1658	ü		ü		ü						TIAM2_HUMAN Isoform 2 of T-lymphoma invasion and metastasis-inducing protein 2
Q8IVH2	FOXP4	8.59664								ü			FOXP4_HUMAN Forkhead box protein P4
Q8IVT2	MISP	15.1673			ü			ü					MISP_HUMAN Mitotic interactor and substrate of PLK1
Q8IWC1	MAP7D3	9.4757						ü		ü			MA7D3_HUMAN MAP7 domain-containing protein 3
Q8IWI9-4	MGA	11.1135								ü			MGAP_HUMAN Isoform 4 of MAX gene-associated protein
Q8IWL3	HSCB	15.7283				ü				ü			HSC20_HUMAN Iron-sulfur cluster co-chaperone protein HscB, mitochondrial
Q8IWR0	ZC3H7A	11.3575								ü			Z3H7A_HUMAN Zinc finger CCCH domain-containing protein 7A
Q8IWS0	PHF6	12.3512								ü			PHF6_HUMAN PHD finger protein 6
Q8IWU5	SULF2	2.77948		ü	ü								SULF2_HUMAN Extracellular sulfatase Sulf-2
Q8IWU6	SULF1	2.80252		ü	ü								SULF1_HUMAN Extracellular sulfatase Sulf-1
Q8IWX8	CHERP	6.25133											CHERP_HUMAN Calcium homeostasis endoplasmic reticulum protein
Q8IWZ3-6	ANKHD1	5.59893								ü			ANKH1_HUMAN Isoform 6 of Ankyrin repeat and KH domain-containing protein 1
Q8IWZ8	SUGP1	11.2762								ü			SUGP1_HUMAN SURP and G-patch domain-containing protein 1
Q8IX01	SUGP2	9.07855								ü			SUGP2_HUMAN SURP and G-patch domain-containing protein 2
Q8IX18	DHX40	5.43986								ü			DHX40_HUMAN Probable ATP-dependent RNA helicase DHX40
Q8IXB1	DNAJC10	13.3221											DJC10_HUMAN DnaJ homolog subfamily C member 10
Q8IXJ6	SIRT2	12.4109			ü		ü	ü		ü			SIR2_HUMAN NAD-dependent protein deacetylase sirtuin-2
Q8IXM3	MRPL41	2.54984				ü						ü	RM41_HUMAN 39S ribosomal protein L41, mitochondrial
Q8IXQ6	PARP9	14.003				ü	ü			ü			PARP9_HUMAN Poly [ADP-ribose] polymerase 9
Q8IY33	MICALL2	11.4608			ü		ü	ü					MILK2_HUMAN MICAL-like protein 2
Q8IY67-2	RAVER1	9.29775								ü			RAVR1_HUMAN Isoform 2 of Ribonucleoprotein PTB-binding 1
Q8IY81	FTSJ3	13.1577								ü			SPB1_HUMAN pre-rRNA processing protein FTSJ3
Q8IYB3	SRRM1	17.0056					ü			ü			SRRM1_HUMAN Serine/arginine repetitive matrix protein 1
Q8IYB5	SMAP1	10.162			ü								SMAP1_HUMAN Stromal membrane-associated protein 1
Q8IYB5-2	SMAP1	12.903			ü								SMAP1_HUMAN Isoform 2 of Stromal membrane-associated protein 1
Q8IYI6	EXOC8	12.3292			ü		ü						EXOC8_HUMAN Exocyst complex component 8
Q8IYS0	GRAMD1C	6.67515			ü								GRM1C_HUMAN GRAM domain-containing protein 1C
Q8IYS2-2	KIAA2013	11.7582											K2013_HUMAN Isoform 2 of Uncharacterized protein KIAA2013
Q8IYU8	MICU2	11.0093				ü				ü			MICU2_HUMAN Calcium uptake protein 2, mitochondrial
Q8IZ81	ELMOD2	15.4307											ELMD2_HUMAN ELMO domain-containing protein 2
Q8IZH2	XRN1	12.2248		ü	ü		ü	ü		ü			XRN1_HUMAN 5'-3' exoribonuclease 1
Q8N0U8	VKORC1L1	13.5645											VKORL_HUMAN Vitamin K epoxide reductase complex subunit 1-like protein 1
Q8N0X7	SPG20	9.03359			ü	ü							SPG20_HUMAN Spartin
Q8N0Y7	PGAM4	17.7366	ü				ü			ü			PGAM4_HUMAN Probable phosphoglycerate mutase 4
Q8N128-2	FAM177A1	6.825											F177A_HUMAN Isoform 2 of Protein FAM177A1
Q8N163-2	CCAR2	12.5593				ü				ü			CCAR2_HUMAN Isoform 2 of Cell cycle and apoptosis regulator protein 2
Q8N183	NDUFAF2	8.73531				ü							MIMIT_HUMAN Mimitin, mitochondrial
Q8N1B4	VPS52	3.6298		ü	ü		ü						VPS52_HUMAN Vacuolar protein sorting-associated protein 52 homolog
Q8N1G2	CMTR1	8.37235								ü			CMTR1_HUMAN Cap-specific mRNA (nucleoside-2'-O-)-methyltransferase 1
Q8N1G4	LRRC47	15.417											LRC47_HUMAN Leucine-rich repeat-containing protein 47
Q8N2F6	ARMC10	16.7954				ü							ARM10_HUMAN Armadillo repeat-containing protein 10
Q8N2I9-4	STK40	16.5271								ü			STK40_HUMAN Isoform 4 of Serine/threonine-protein kinase 40
Q8N2K0-2	ABHD12	9.00308			ü								ABD12_HUMAN Isoform 2 of Monoacylglycerol lipase ABHD12
Q8N2W9	PIAS4	5.87612								ü			PIAS4_HUMAN E3 SUMO-protein ligase PIAS4
Q8N335	GPD1L	15.393	ü		ü		ü						GPD1L_HUMAN Glycerol-3-phosphate dehydrogenase 1-like protein
Q8N370-3	SLC43A2	9.67947			ü								LAT4_HUMAN Isoform 3 of Large neutral amino acids transporter small subunit 4
Q8N3J9	ZNF664	4.85635								ü			ZN664_HUMAN Zinc finger protein 664
Q8N3U4-2	STAG2	9.21983					ü	ü		ü			STAG2_HUMAN Isoform 2 of Cohesin subunit SA-2
Q8N4A0	GALNT4	14.7856	ü	ü									GALT4_HUMAN Polypeptide N-acetylgalactosaminyltransferase 4
Q8N4S9	MARVELD2	8.03835			ü								MALD2_HUMAN MARVEL domain-containing protein 2
Q8N4V1-2	MMGT1	10.515		ü	ü								MMGT1_HUMAN Isoform 2 of Membrane magnesium transporter 1
Q8N565-2	MREG	10.2174			ü								MREG_HUMAN Isoform 2 of Melanoregulin
Q8N5C6	SRBD1	22.0327											SRBD1_HUMAN S1 RNA-binding domain-containing protein 1
Q8N5C7	DTWD1	15.3487											DTWD1_HUMAN DTW domain-containing protein 1
Q8N5F7	NKAP	12.81								ü			NKAP_HUMAN NF-kappa-B-activating protein
Q8N5G0	SMIM20	12.8886				ü							SMI20_HUMAN Small integral membrane protein 20
Q8N5G2	TMEM57	11.3075								ü			MACOI_HUMAN Macoilin
Q8N5M4	TTC9C	12.1969											TTC9C_HUMAN Tetratricopeptide repeat protein 9C
Q8N5N7	MRPL50	3.68225				ü						ü	RM50_HUMAN 39S ribosomal protein L50, mitochondrial
Q8N5P1	ZC3H8	6.72436								ü			ZC3H8_HUMAN Zinc finger CCCH domain-containing protein 8
Q8N684-3	CPSF7	11.7562								ü			CPSF7_HUMAN Isoform 3 of Cleavage and polyadenylation specificity factor subunit 7
Q8N6H7	ARFGAP2	8.04208		ü	ü		ü						ARFG2_HUMAN ADP-ribosylation factor GTPase-activating protein 2
Q8N6L1-2	KRTCAP2	6.08825											KTAP2_HUMAN Isoform 2 of Keratinocyte-associated protein 2
Q8N6M0	OTUD6B	9.60038											OTU6B_HUMAN OTU domain-containing protein 6B
Q8N6R0	METTL13	4.79189											MET13_HUMAN Methyltransferase-like protein 13
Q8N6T3-2	ARFGAP1	9.91201		ü			ü						ARFG1_HUMAN Isoform 2 of ADP-ribosylation factor GTPase-activating protein 1
Q8N766	EMC1	24.7907											EMC1_HUMAN ER membrane protein complex subunit 1
Q8N7H5	PAF1	8.19226								ü			PAF1_HUMAN RNA polymerase II-associated factor 1 homolog
Q8N7P1	PLD5	11.3873											PLD5_HUMAN Inactive phospholipase D5
Q8N806	UBR7	7.88563											UBR7_HUMAN Putative E3 ubiquitin-protein ligase UBR7
Q8N8J7	C4orf32	11.4532											CD032_HUMAN Uncharacterized protein C4orf32
Q8N8Q9	NIPA2	11.169			ü								NIPA2_HUMAN Magnesium transporter NIPA2
Q8N8R3	SLC25A29	12.2942			ü	ü							MCATL_HUMAN Mitochondrial carnitine/acylcarnitine carrier protein CACL
Q8N8S7	ENAH	13.1427			ü		ü	ü					ENAH_HUMAN Protein enabled homolog
Q8N987	NECAB1	3.62316								ü			NECA1_HUMAN N-terminal EF-hand calcium-binding protein 1
Q8N9N8	EIF1AD	5.61571						ü		ü			EIF1A_HUMAN Probable RNA-binding protein EIF1AD
Q8N9U0	TC2N	3.99416								ü			TAC2N_HUMAN Tandem C2 domains nuclear protein
Q8NAV1	PRPF38A	6.28876								ü			PR38A_HUMAN Pre-mRNA-splicing factor 38A
Q8NBJ7-3	SUMF2	4.81519											SUMF2_HUMAN Isoform 3 of Sulfatase-modifying factor 2
Q8NBL1	POGLUT1	7.44999	ü										PGLT1_HUMAN Protein O-glucosyltransferase 1
Q8NBM4	UBAC2	15.8651											UBAC2_HUMAN Ubiquitin-associated domain-containing protein 2
Q8NBS9	TXNDC5	12.5616	ü						ü				TXND5_HUMAN Thioredoxin domain-containing protein 5
Q8NBU5	ATAD1	8.19904			ü	ü				ü			ATAD1_HUMAN ATPase family AAA domain-containing protein 1
Q8NBX0	SCCPDH	23.8523			ü	ü				ü			SCPDL_HUMAN Saccharopine dehydrogenase-like oxidoreductase
Q8NC51	SERBP1	7.53093	ü		ü					ü			PAIRB_HUMAN Plasminogen activator inhibitor 1 RNA-binding protein
Q8NC54	KCT2	6.71199											KCT2_HUMAN Keratinocyte-associated transmembrane protein 2
Q8NC56	LEMD2	12.3051								ü			LEMD2_HUMAN LEM domain-containing protein 2
Q8NC60	NOA1	12.1647				ü							NOA1_HUMAN Nitric oxide-associated protein 1
Q8NC96	NECAP1	10.7632			ü								NECP1_HUMAN Adaptin ear-binding coat-associated protein 1
Q8NCA5	FAM98A	7.85436											FA98A_HUMAN Protein FAM98A
Q8NCK3	ZNF485	8.85472								ü			ZN485_HUMAN Zinc finger protein 485
Q8NCL4	GALNT6	10.563		ü									GALT6_HUMAN Polypeptide N-acetylgalactosaminyltransferase 6
Q8NCU8	LINC00116	13.3864											YB039_HUMAN Putative uncharacterized protein encoded by LINC00116
Q8NCW5	APOA1BP	20.2734	ü			ü	ü			ü			NNRE_HUMAN NAD(P)H-hydrate epimerase
Q8ND04-2	SMG8	9.26791					ü						SMG8_HUMAN Isoform 2 of Protein SMG8
Q8ND56-2	LSM14A	8.89563											LS14A_HUMAN Isoform 2 of Protein LSM14 homolog A
Q8NDX6	ZNF740	12.3887								ü			ZN740_HUMAN Zinc finger protein 740
Q8NE65	ZNF738	7.87846								ü			ZN738_HUMAN Protein ZNF738
Q8NE71	ABCF1	16.8036					ü			ü		ü	ABCF1_HUMAN ATP-binding cassette sub-family F member 1
Q8NE86	MCU	14.037				ü							MCU_HUMAN Calcium uniporter protein, mitochondrial
Q8NEF9	SRFBP1	7.50403								ü			SRFB1_HUMAN Serum response factor-binding protein 1
Q8NEV1	CSNK2A3	12.1095											CSK23_HUMAN Casein kinase II subunit alpha 3
Q8NEY8	PPHLN1	11.3408		ü						ü			PPHLN_HUMAN Periphilin-1
Q8NF64	ZMIZ2	4.8367				ü				ü			ZMIZ2_HUMAN Zinc finger MIZ domain-containing protein 2
Q8NF91	SYNE1	12.8123		ü				ü		ü			SYNE1_HUMAN Nesprin-1
Q8NFC6	BOD1L1	25.4273								ü			BD1L1_HUMAN Biorientation of chromosomes in cell division protein 1-like 1
Q8NFH5	NUP35	4.90238			ü			ü		ü			NUP53_HUMAN Nucleoporin NUP53
Q8NFJ5	GPRC5A	11.3204	ü		ü								RAI3_HUMAN Retinoic acid-induced protein 3
Q8NFV4	ABHD11	8.44992				ü							ABHDB_HUMAN Alpha/beta hydrolase domain-containing protein 11
Q8NFW8	CMAS	13.8077					ü			ü			NEUA_HUMAN N-acylneuraminate cytidylyltransferase
Q8NHH9	ATL2	19.1954											ATLA2_HUMAN Atlastin-2
Q8NHM5	KDM2B	10.4061								ü			KDM2B_HUMAN Lysine-specific demethylase 2B
Q8NHQ9	DDX55	9.35169											DDX55_HUMAN ATP-dependent RNA helicase DDX55
Q8NHW5	RPLP0P6	12.621					ü					ü	RLA0L_HUMAN 60S acidic ribosomal protein P0-like
Q8NI27	THOC2	2.93259								ü			THOC2_HUMAN THO complex subunit 2
Q8NI77	KIF18A	3.44746					ü	ü		ü			KI18A_HUMAN Kinesin-like protein KIF18A
Q8TAA3	PSMA8	2.00639	ü				ü			ü	ü		PSA7L_HUMAN Proteasome subunit alpha type-7-like
Q8TAA9	VANGL1	7.32481			ü								VANG1_HUMAN Vang-like protein 1
Q8TAQ2	SMARCC2	8.89905								ü			SMRC2_HUMAN SWI/SNF complex subunit SMARCC2
Q8TAT6-2	NPLOC4	12.6325					ü			ü			NPL4_HUMAN Isoform 2 of Nuclear protein localization protein 4 homolog
Q8TB61	SLC35B2	20.3747		ü									S35B2_HUMAN Adenosine 3'-phospho 5'-phosphosulfate transporter 1
Q8TB72	PUM2	12.6348								ü			PUM2_HUMAN Pumilio homolog 2
Q8TBA6	GOLGA5	19.1848		ü									GOGA5_HUMAN Golgin subfamily A member 5
Q8TBF4	ZCRB1	7.27866								ü			ZCRB1_HUMAN Zinc finger CCHC-type and RNA-binding motif-containing protein 1
Q8TBM8	DNAJB14	8.00124											DJB14_HUMAN DnaJ homolog subfamily B member 14
Q8TBQ9	TMEM167A	15.0553		ü									KISHA_HUMAN Protein kish-A
Q8TBX8	PIP4K2C	8.20584	ü		ü		ü						PI42C_HUMAN Phosphatidylinositol 5-phosphate 4-kinase type-2 gamma
Q8TC12	RDH11	11.1942											RDH11_HUMAN Retinol dehydrogenase 11
Q8TCC3-2	MRPL30	5.48202				ü						ü	RM30_HUMAN Isoform 2 of 39S ribosomal protein L30, mitochondrial
Q8TCD1	C18orf32	10.5278											CR032_HUMAN UPF0729 protein C18orf32
Q8TCG1	KIAA1524	7.13922			ü								CIP2A_HUMAN Protein CIP2A
Q8TCJ2	STT3B	15.5345											STT3B_HUMAN Dolichyl-diphosphooligosaccharide--protein glycosyltransferase subunit STT3B
Q8TCT8	SPPL2A	10.2068	ü	ü	ü				ü				SPP2A_HUMAN Signal peptide peptidase-like 2A
Q8TCT9-2	HM13	7.88294		ü	ü				ü				HM13_HUMAN Isoform 2 of Minor histocompatibility antigen H13
Q8TCU6	PREX1	7.36999			ü		ü						PREX1_HUMAN Phosphatidylinositol 3,4,5-trisphosphate-dependent Rac exchanger 1 protein
Q8TD19	NEK9	16.5114					ü	ü		ü			NEK9_HUMAN Serine/threonine-protein kinase Nek9
Q8TD30	GPT2	6.67579				ü							ALAT2_HUMAN Alanine aminotransferase 2
Q8TDB6	DTX3L	13.4045					ü			ü			DTX3L_HUMAN E3 ubiquitin-protein ligase DTX3L
Q8TDD1-2	DDX54	16.5706								ü			DDX54_HUMAN Isoform 2 of ATP-dependent RNA helicase DDX54
Q8TDW5-2	SYTL5	4.98631											SYTL5_HUMAN Isoform 2 of Synaptotagmin-like protein 5
Q8TED0	UTP15	6.77365								ü			UTP15_HUMAN U3 small nucleolar RNA-associated protein 15 homolog
Q8TEW0	PARD3	11.4494			ü		ü	ü					PARD3_HUMAN Partitioning defective 3 homolog
Q8TEX9-2	IPO4	10.8186								ü			IPO4_HUMAN Isoform 2 of Importin-4
Q8TEY7	USP33	5.43049		ü				ü		ü			UBP33_HUMAN Ubiquitin carboxyl-terminal hydrolase 33
[truncated: 972 more rows]
