# Supplementary material for: Systematic quantification of the dynamics of newly synthesized proteins unveiling their degradation pathways in human cells
Source: Chem Sci. 2020 Mar 10;11(13):3557–68. doi: 10.1039/c9sc06479f (PMC8152571; doi:10.1039/c9sc06479f)
Supplement: SC-011-C9SC06479F-s004 [file SC-011-C9SC06479F-s004.xlsx]

## Sheet: Proteasome
Table S3a - The half-lives of proteins in the proteasome
Uniprot ID	Gene Symbol	Half-life (h)	Classification	Annotation
P25786-2	PSMA1	1.99846	core subunit	PSA1_HUMAN Isoform Long of Proteasome subunit alpha type-1
P25788	PSMA3	1.70445	core subunit	PSA3_HUMAN Proteasome subunit alpha type-3
P25789	PSMA4	1.97018	core subunit	PSA4_HUMAN Proteasome subunit alpha type-4
P60900	PSMA6	2.2185	core subunit	PSA6_HUMAN Proteasome subunit alpha type-6
O14818	PSMA7	1.6054	core subunit	PSA7_HUMAN Proteasome subunit alpha type-7
Q8TAA3	PSMA8	2.00639	core subunit	PSA7L_HUMAN Proteasome subunit alpha type-7-like
P20618	PSMB1	0.965386	core subunit	PSB1_HUMAN Proteasome subunit beta type-1
P49720	PSMB3	4.15332	core subunit	PSB3_HUMAN Proteasome subunit beta type-3
Q99436	PSMB7	1.10962	core subunit	PSB7_HUMAN Proteasome subunit beta type-7
P62191	PSMC1	4.30687	regulatory subunit	PRS4_HUMAN 26S protease regulatory subunit 4
P35998	PSMC2	6.41625	regulatory subunit	PRS7_HUMAN 26S protease regulatory subunit 7
P17980	PSMC3	4.01429	regulatory subunit	PRS6A_HUMAN 26S protease regulatory subunit 6A
P43686	PSMC4	5.29362	regulatory subunit	PRS6B_HUMAN 26S protease regulatory subunit 6B
P62195	PSMC5	2.95736	regulatory subunit	PRS8_HUMAN 26S protease regulatory subunit 8
P62333	PSMC6	4.62499	regulatory subunit	PRS10_HUMAN 26S protease regulatory subunit 10B
Q99460	PSMD1	6.63807	regulatory subunit	PSMD1_HUMAN 26S proteasome non-ATPase regulatory subunit 1
O75832	PSMD10	12.903	regulatory subunit	PSD10_HUMAN 26S proteasome non-ATPase regulatory subunit 10
O00231-2	PSMD11	9.66867	regulatory subunit	PSD11_HUMAN Isoform 2 of 26S proteasome non-ATPase regulatory subunit 11
O00232	PSMD12	3.25391	regulatory subunit	PSD12_HUMAN 26S proteasome non-ATPase regulatory subunit 12
Q9UNM6-2	PSMD13	8.93231	regulatory subunit	PSD13_HUMAN Isoform 2 of 26S proteasome non-ATPase regulatory subunit 13
O00487	PSMD14	6.67001	regulatory subunit	PSDE_HUMAN 26S proteasome non-ATPase regulatory subunit 14
Q13200	PSMD2	6.11349	regulatory subunit	PSMD2_HUMAN 26S proteasome non-ATPase regulatory subunit 2
O43242	PSMD3	14.7761	regulatory subunit	PSMD3_HUMAN 26S proteasome non-ATPase regulatory subunit 3
Q16401	PSMD5	16.0265	regulatory subunit	PSMD5_HUMAN 26S proteasome non-ATPase regulatory subunit 5
Q15008	PSMD6	1.83154	regulatory subunit	PSMD6_HUMAN 26S proteasome non-ATPase regulatory subunit 6
P51665	PSMD7	6.92801	regulatory subunit	PSMD7_HUMAN 26S proteasome non-ATPase regulatory subunit 7
P48556	PSMD8	11.2269	regulatory subunit	PSMD8_HUMAN 26S proteasome non-ATPase regulatory subunit 8
O00233	PSMD9	9.40116	regulatory subunit	PSMD9_HUMAN 26S proteasome non-ATPase regulatory subunit 9
Q06323-2	PSME1	16.4839	regulatory subunit	PSME1_HUMAN Isoform 2 of Proteasome activator complex subunit 1
Q9UL46	PSME2	8.239	regulatory subunit	PSME2_HUMAN Proteasome activator complex subunit 2
P61289-2	PSME3	14.5558	regulatory subunit	PSME3_HUMAN Isoform 2 of Proteasome activator complex subunit 3

## Sheet: Ribosome
Table S3b - The half-lives of proteins in the ribosome
Uniprot ID	Gene Symbol	Half-life (h)	Classification	Annotation
P27635	RPL10	5.44542	cytosolic large subunit	RL10_HUMAN 60S ribosomal protein L10
P62906	RPL10A	5.16311	cytosolic large subunit	RL10A_HUMAN 60S ribosomal protein L10a
Q96L21	RPL10L	5.01917	cytosolic large subunit	RL10L_HUMAN 60S ribosomal protein L10-like
P62913	RPL11	5.39918	cytosolic large subunit	RL11_HUMAN 60S ribosomal protein L11
P30050	RPL12	3.01526	cytosolic large subunit	RL12_HUMAN 60S ribosomal protein L12
P26373	RPL13	5.5474	cytosolic large subunit	RL13_HUMAN 60S ribosomal protein L13
P40429	RPL13A	4.05444	cytosolic large subunit	RL13A_HUMAN 60S ribosomal protein L13a
P61313	RPL15	1.22674	cytosolic large subunit	RL15_HUMAN 60S ribosomal protein L15
P18621-3	RPL17	7.28555	cytosolic large subunit	RL17_HUMAN Isoform 3 of 60S ribosomal protein L17
Q07020	RPL18	5.24476	cytosolic large subunit	RL18_HUMAN 60S ribosomal protein L18
Q02543	RPL18A	9.35548	cytosolic large subunit	RL18A_HUMAN 60S ribosomal protein L18a
P84098	RPL19	3.51192	cytosolic large subunit	RL19_HUMAN 60S ribosomal protein L19
P46778	RPL21	14.5344	cytosolic large subunit	RL21_HUMAN 60S ribosomal protein L21
P35268	RPL22	4.20752	cytosolic large subunit	RL22_HUMAN 60S ribosomal protein L22
P62829	RPL23	7.96996	cytosolic large subunit	RL23_HUMAN 60S ribosomal protein L23
P62750	RPL23A	4.90932	cytosolic large subunit	RL23A_HUMAN 60S ribosomal protein L23a
P83731	RPL24	5.6436	cytosolic large subunit	RL24_HUMAN 60S ribosomal protein L24
P61254	RPL26	2.46338	cytosolic large subunit	RL26_HUMAN 60S ribosomal protein L26
P61353	RPL27	3.04012	cytosolic large subunit	RL27_HUMAN 60S ribosomal protein L27
P46776	RPL27A	9.27411	cytosolic large subunit	RL27A_HUMAN 60S ribosomal protein L27a
P46779-3	RPL28	7.58865	cytosolic large subunit	RL28_HUMAN Isoform 3 of 60S ribosomal protein L28
P47914	RPL29	3.67055	cytosolic large subunit	RL29_HUMAN 60S ribosomal protein L29
P39023	RPL3	3.38616	cytosolic large subunit	RL3_HUMAN 60S ribosomal protein L3
P62888	RPL30	2.21892	cytosolic large subunit	RL30_HUMAN 60S ribosomal protein L30
P62910	RPL32	2.75825	cytosolic large subunit	RL32_HUMAN 60S ribosomal protein L32
P42766	RPL35	1.68797	cytosolic large subunit	RL35_HUMAN 60S ribosomal protein L35
P18077	RPL35A	7.66332	cytosolic large subunit	RL35A_HUMAN 60S ribosomal protein L35a
P83881	RPL36A	4.14116	cytosolic large subunit	RL36A_HUMAN 60S ribosomal protein L36a
P61927	RPL37	3.37495	cytosolic large subunit	RL37_HUMAN 60S ribosomal protein L37
A6NKH3	RPL37L	7.64894	cytosolic large subunit	RL37L_HUMAN Putative 60S ribosomal protein L37a-like
P62891	RPL39	6.23839	cytosolic large subunit	RL39_HUMAN 60S ribosomal protein L39
Q92901	RPL3L	3.9898	cytosolic large subunit	RL3L_HUMAN 60S ribosomal protein L3-like
P36578	RPL4	6.82366	cytosolic large subunit	RL4_HUMAN 60S ribosomal protein L4
P46777	RPL5	12.81	cytosolic large subunit	RL5_HUMAN 60S ribosomal protein L5
Q02878	RPL6	3.68303	cytosolic large subunit	RL6_HUMAN 60S ribosomal protein L6
P18124	RPL7	12.9126	cytosolic large subunit	RL7_HUMAN 60S ribosomal protein L7
P62424	RPL7A	2.80116	cytosolic large subunit	RL7A_HUMAN 60S ribosomal protein L7a
Q6DKI1	RPL7L1	8.98208	cytosolic large subunit	RL7L_HUMAN 60S ribosomal protein L7-like 1
P62917	RPL8	2.45449	cytosolic large subunit	RL8_HUMAN 60S ribosomal protein L8
P32969	RPL9	7.43162	cytosolic large subunit	RL9_HUMAN 60S ribosomal protein L9
P05388	RPLP0	14.5956	cytosolic large subunit	RLA0_HUMAN 60S acidic ribosomal protein P0
Q8NHW5	RPLP0P6	12.621	cytosolic large subunit	RLA0L_HUMAN 60S acidic ribosomal protein P0-like
P05386	RPLP1	6.8351	cytosolic large subunit	RLA1_HUMAN 60S acidic ribosomal protein P1
P05387	RPLP2	9.73658	cytosolic large subunit	RLA2_HUMAN 60S acidic ribosomal protein P2
Q9NQ39	RPS10P5	3.15253	cytosolic small subunit	RS10L_HUMAN Putative 40S ribosomal protein S10-like
P62280	RPS11	4.96737	cytosolic small subunit	RS11_HUMAN 40S ribosomal protein S11
P25398	RPS12	12.2356	cytosolic small subunit	RS12_HUMAN 40S ribosomal protein S12
P62277	RPS13	9.89786	cytosolic small subunit	RS13_HUMAN 40S ribosomal protein S13
P62263	RPS14	4.22599	cytosolic small subunit	RS14_HUMAN 40S ribosomal protein S14
P62841	RPS15	6.33821	cytosolic small subunit	RS15_HUMAN 40S ribosomal protein S15
P62244	RPS15A	5.1185	cytosolic small subunit	RS15A_HUMAN 40S ribosomal protein S15a
P62249	RPS16	16.0154	cytosolic small subunit	RS16_HUMAN 40S ribosomal protein S16
P0CW22	RPS17L	5.97077	cytosolic small subunit	RS17L_HUMAN 40S ribosomal protein S17-like
P62269	RPS18	7.7908	cytosolic small subunit	RS18_HUMAN 40S ribosomal protein S18
P39019	RPS19	8.88536	cytosolic small subunit	RS19_HUMAN 40S ribosomal protein S19
P15880	RPS2	5.29767	cytosolic small subunit	RS2_HUMAN 40S ribosomal protein S2
P60866-2	RPS20	5.35621	cytosolic small subunit	RS20_HUMAN Isoform 2 of 40S ribosomal protein S20
P63220	RPS21	2.58792	cytosolic small subunit	RS21_HUMAN 40S ribosomal protein S21
P62266	RPS23	6.8642	cytosolic small subunit	RS23_HUMAN 40S ribosomal protein S23
P62847-4	RPS24	6.6368	cytosolic small subunit	RS24_HUMAN Isoform 4 of 40S ribosomal protein S24
P62851	RPS25	2.51013	cytosolic small subunit	RS25_HUMAN 40S ribosomal protein S25
P42677	RPS27	2.15967	cytosolic small subunit	RS27_HUMAN 40S ribosomal protein S27
P62979	RPS27A	5.18396	cytosolic small subunit	RS27A_HUMAN Ubiquitin-40S ribosomal protein S27a
Q71UM5	RPS27L	4.05278	cytosolic small subunit	RS27L_HUMAN 40S ribosomal protein S27-like
P62273-2	RPS29	12.7981	cytosolic small subunit	RS29_HUMAN Isoform 2 of 40S ribosomal protein S29
P23396-2	RPS3	5.73607	cytosolic small subunit	RS3_HUMAN Isoform 2 of 40S ribosomal protein S3
P61247	RPS3A	3.17724	cytosolic small subunit	RS3A_HUMAN 40S ribosomal protein S3a
P62701	RPS4X	5.08695	cytosolic small subunit	RS4X_HUMAN 40S ribosomal protein S4, X isoform
P46782	RPS5	1.89338	cytosolic small subunit	RS5_HUMAN 40S ribosomal protein S5
P62753	RPS6	6.31454	cytosolic small subunit	RS6_HUMAN 40S ribosomal protein S6
Q15349-2	RPS6KA2	15.7498	cytosolic small subunit	KS6A2_HUMAN Isoform 2 of Ribosomal protein S6 kinase alpha-2
O75676	RPS6KA4	6.68416	cytosolic small subunit	KS6A4_HUMAN Ribosomal protein S6 kinase alpha-4
P62081	RPS7	4.57251	cytosolic small subunit	RS7_HUMAN 40S ribosomal protein S7
P62241	RPS8	5.80477	cytosolic small subunit	RS8_HUMAN 40S ribosomal protein S8
P46781	RPS9	5.0407	cytosolic small subunit	RS9_HUMAN 40S ribosomal protein S9
P08865	RPSA	9.03712	cytosolic small subunit	RSSA_HUMAN 40S ribosomal protein SA
Q14197	ICT1	4.22909	mitochondiral large subunit	ICT1_HUMAN Peptidyl-tRNA hydrolase ICT1, mitochondrial
Q9BYD6	MRPL1	10.243	mitochondiral large subunit	RM01_HUMAN 39S ribosomal protein L1, mitochondrial
Q9Y3B7	MRPL11	5.06021	mitochondiral large subunit	RM11_HUMAN 39S ribosomal protein L11, mitochondrial
Q9NRX2	MRPL17	6.47136	mitochondiral large subunit	RM17_HUMAN 39S ribosomal protein L17, mitochondrial
Q9NWU5	MRPL22	6.26262	mitochondiral large subunit	RM22_HUMAN 39S ribosomal protein L22, mitochondrial
Q13084	MRPL28	4.24566	mitochondiral large subunit	RM28_HUMAN 39S ribosomal protein L28, mitochondrial
P09001	MRPL3	5.64222	mitochondiral large subunit	RM03_HUMAN 39S ribosomal protein L3, mitochondrial
Q8TCC3-2	MRPL30	5.48202	mitochondiral large subunit	RM30_HUMAN Isoform 2 of 39S ribosomal protein L30, mitochondrial
O75394	MRPL33	9.01831	mitochondiral large subunit	RM33_HUMAN 39S ribosomal protein L33, mitochondrial
Q9P0J6	MRPL36	13.5513	mitochondiral large subunit	RM36_HUMAN 39S ribosomal protein L36, mitochondrial
Q9BZE1	MRPL37	5.11812	mitochondiral large subunit	RM37_HUMAN 39S ribosomal protein L37, mitochondrial
Q9NYK5-2	MRPL39	3.68735	mitochondiral large subunit	RM39_HUMAN Isoform 2 of 39S ribosomal protein L39, mitochondrial
Q9BYD3	MRPL4	5.00395	mitochondiral large subunit	RM04_HUMAN 39S ribosomal protein L4, mitochondrial
Q9NQ50	MRPL40	6.31512	mitochondiral large subunit	RM40_HUMAN 39S ribosomal protein L40, mitochondrial
Q8IXM3	MRPL41	2.54984	mitochondiral large subunit	RM41_HUMAN 39S ribosomal protein L41, mitochondrial
Q9Y6G3	MRPL42	6.26489	mitochondiral large subunit	RM42_HUMAN 39S ribosomal protein L42, mitochondrial
Q9H9J2	MRPL44	5.66852	mitochondiral large subunit	RM44_HUMAN 39S ribosomal protein L44, mitochondrial
Q9BRJ2	MRPL45	7.76723	mitochondiral large subunit	RM45_HUMAN 39S ribosomal protein L45, mitochondrial
Q9H2W6	MRPL46	7.32095	mitochondiral large subunit	RM46_HUMAN 39S ribosomal protein L46, mitochondrial
Q9HD33	MRPL47	4.76947	mitochondiral large subunit	RM47_HUMAN 39S ribosomal protein L47, mitochondrial
Q96GC5	MRPL48	6.00231	mitochondiral large subunit	RM48_HUMAN 39S ribosomal protein L48, mitochondrial
Q13405	MRPL49	4.54702	mitochondiral large subunit	RM49_HUMAN 39S ribosomal protein L49, mitochondrial
Q8N5N7	MRPL50	3.68225	mitochondiral large subunit	RM50_HUMAN 39S ribosomal protein L50, mitochondrial
Q4U2R6	MRPL51	4.65825	mitochondiral large subunit	RM51_HUMAN 39S ribosomal protein L51, mitochondrial
Q96EL3	MRPL53	5.05762	mitochondiral large subunit	RM53_HUMAN 39S ribosomal protein L53, mitochondrial
Q9BYD2	MRPL9	2.40001	mitochondiral large subunit	RM09_HUMAN 39S ribosomal protein L9, mitochondrial
P82912	MRPS11	5.99764	mitochondiral small subunit	RT11_HUMAN 28S ribosomal protein S11, mitochondrial
P82914	MRPS15	3.8719	mitochondiral small subunit	RT15_HUMAN 28S ribosomal protein S15, mitochondrial
Q9Y399	MRPS2	5.12455	mitochondiral small subunit	RT02_HUMAN 28S ribosomal protein S2, mitochondrial
P82650	MRPS22	8.60198	mitochondiral small subunit	RT22_HUMAN 28S ribosomal protein S22, mitochondrial
Q9Y3D9	MRPS23	3.94461	mitochondiral small subunit	RT23_HUMAN 28S ribosomal protein S23, mitochondrial
P82663	MRPS25	3.75791	mitochondiral small subunit	RT25_HUMAN 28S ribosomal protein S25, mitochondrial
Q9BYN8	MRPS26	9.47311	mitochondiral small subunit	RT26_HUMAN 28S ribosomal protein S26, mitochondrial
Q92552	MRPS27	9.58975	mitochondiral small subunit	RT27_HUMAN 28S ribosomal protein S27, mitochondrial
Q9Y291	MRPS33	7.30782	mitochondiral small subunit	RT33_HUMAN 28S ribosomal protein S33, mitochondrial
P82930	MRPS34	3.95564	mitochondiral small subunit	RT34_HUMAN 28S ribosomal protein S34, mitochondrial
P82673	MRPS35	2.57589	mitochondiral small subunit	RT35_HUMAN 28S ribosomal protein S35, mitochondrial
P82675	MRPS5	9.55275	mitochondiral small subunit	RT05_HUMAN 28S ribosomal protein S5, mitochondrial
P82932	MRPS6	6.77629	mitochondiral small subunit	RT06_HUMAN 28S ribosomal protein S6, mitochondrial
Q9Y2R9	MRPS7	3.55789	mitochondiral small subunit	RT07_HUMAN 28S ribosomal protein S7, mitochondrial
P82933	MRPS9	7.78642	mitochondiral small subunit	RT09_HUMAN 28S ribosomal protein S9, mitochondrial
