# Supplementary material for: Systematic quantification of the dynamics of newly synthesized proteins unveiling their degradation pathways in human cells
Source: Chem Sci. 2020 Mar 10;11(13):3557–68. doi: 10.1039/c9sc06479f (PMC8152571; doi:10.1039/c9sc06479f)
Supplement: SC-011-C9SC06479F-s005 [file SC-011-C9SC06479F-s005.xlsx]

## Sheet: Sheet1
Table S4 - Comparison of the half-lives of 4042 quantified proteins in three experiments
Uniprot ID	Gene Symbol	Half-life (h) in Ctrl Expt	Half-life (h) in Btz Expt	Half-life (h) in 3-MA Expt	Fold change (Btz/Ctrl)	Fold change (3MA/Ctrl)	Degradation pathway	Annotation
A0AV96	RBM47	7.98925	18.1547	10.1873	2.27239	1.27513	proteasome	RBM47_HUMAN RNA-binding protein 47
A0AVT1	UBA6	N/A	12.3865	N/A	N/A	N/A	N/A	UBA6_HUMAN Ubiquitin-like modifier-activating enzyme 6
A0FGR8-6	ESYT2	17.5391	29.1116	35.3286	1.65981	2.01427	lysosome	ESYT2_HUMAN Isoform 6 of Extended synaptotagmin-2
A1L0T0	ILVBL	10.4673	19.2381	17.6104	1.83791	1.68242	not certain	ILVBL_HUMAN Acetolactate synthase-like protein
A2A3N6	PIPSL	5.89963	29.0506	2.96267	4.92414	0.50218	proteasome	PIPSL_HUMAN Putative PIP5K1A and PSMD4-like protein
A2RRP1	NBAS	11.9241	19.5033	N/A	1.63562	N/A	N/A	NBAS_HUMAN Neuroblastoma-amplified sequence
A3KMH1	VWA8	9.75165	N/A	>200	N/A	20.5094	N/A	VWA8_HUMAN von Willebrand factor A domain-containing protein 8
A3KN83	SBNO1	10.555	17.2768	15.2307	1.63684	1.44298	not certain	SBNO1_HUMAN Protein strawberry notch homolog 1
A4D1E9	GTPBP10	7.32017	13.9382	8.31112	1.90408	1.13537	not certain	GTPBA_HUMAN GTP-binding protein 10
A5YKK6	CNOT1	10.7116	63.8845	N/A	5.96406	N/A	N/A	CNOT1_HUMAN CCR4-NOT transcription complex subunit 1
A6NCI4	VWA3A	11.1063	11.1708	5.83703	1.0058	0.525558	not certain	VWA3A_HUMAN von Willebrand factor A domain-containing protein 3A
A6NDG6	PGP	21.6473	17.6463	11.1099	0.815173	0.513223	not certain	PGP_HUMAN Phosphoglycolate phosphatase
A6NDU8	C5orf51	N/A	14.4285	N/A	N/A	N/A	N/A	CE051_HUMAN UPF0600 protein C5orf51
A6NE01	FAM186A	N/A	N/A	18.1881	N/A	N/A	N/A	F186A_HUMAN Protein FAM186A
A6NIZ1		26.3855	33.3565	>200	1.2642	7.57992	lysosome	RP1BL_HUMAN Ras-related protein Rap-1b-like protein
A6NKD9	CCDC85C	5.62163	N/A	N/A	N/A	N/A	N/A	CC85C_HUMAN Coiled-coil domain-containing protein 85C
A6NKH3	RPL37L	7.64894	N/A	7.68882	N/A	1.00521	N/A	RL37L_HUMAN Putative 60S ribosomal protein L37a-like
A8MTT3	CEBPZOS	10.1397	N/A	22.556	N/A	2.22454	N/A	A8MTT3_HUMAN Protein CEBPZOS
A8MW92	PHF20L1	N/A	29.2591	N/A	N/A	N/A	N/A	P20L1_HUMAN PHD finger protein 20-like protein 1
A8MWD9	SNRPGP15	N/A	12.0401	6.41922	N/A	N/A	N/A	RUXGL_HUMAN Small nuclear ribonucleoprotein G-like protein
A8MXP9	MATR3	N/A	N/A	16.0191	N/A	N/A	N/A	A8MXP9_HUMAN Matrin-3
A9UHW6	MIF4GD	5.67735	N/A	N/A	N/A	N/A	N/A	MI4GD_HUMAN MIF4G domain-containing protein
A9UHW6-3	MIF4GD	10.8695	55.5852	9.14684	5.11387	0.841515	proteasome	MI4GD_HUMAN Isoform 3 of MIF4G domain-containing protein
B4DKA8	USP8	N/A	N/A	32.3749	N/A	N/A	N/A	B4DKA8_HUMAN Ubiquitin carboxyl-terminal hydrolase
B4DTU4	LIG1	8.8344	38.7666	16.5114	4.38814	1.86899	proteasome	B4DTU4_HUMAN DNA ligase
B5ME19	EIF3CL	1.84475	11.8446	2.69414	6.42071	1.46043	proteasome	EIFCL_HUMAN Eukaryotic translation initiation factor 3 subunit C-like protein
B7ZLX3	CLASP1	N/A	39.0726	N/A	N/A	N/A	N/A	B7ZLX3_HUMAN CLASP1 protein
C9J2U4	TAMM41	14.8426	N/A	17.2725	N/A	1.16372	N/A	C9J2U4_HUMAN Chromosome 3 open reading frame 31, isoform CRA_f
E7EQ69	NAA50	8.02625	28.7852	N/A	3.58638	N/A	N/A	E7EQ69_HUMAN N-alpha-acetyltransferase 50
E7ETH6	ZNF587B	N/A	N/A	4.44867	N/A	N/A	N/A	Z587B_HUMAN Zinc finger protein 587B
E9PN48	ARFGAP2	10.2887	>200	11.3278	19.4389	1.101	proteasome	E9PN48_HUMAN ADP-ribosylation factor GTPase-activating protein 2 (Fragment)
E9PRG8	C11orf48	8.3906	27.5386	10.0079	3.28208	1.19275	proteasome	E9PRG8_HUMAN Uncharacterized protein C11orf48
F8WCI5	C3orf33	N/A	N/A	76.3378	N/A	N/A	N/A	F8WCI5_HUMAN Uncharacterized protein C3orf33
G3V203	RPL18	N/A	N/A	3.47025	N/A	N/A	N/A	G3V203_HUMAN 60S ribosomal protein L18
G3V4T6	GSTZ1	12.4532	27.3539	34.4678	2.19653	2.76778	both	G3V4T6_HUMAN Maleylacetoacetate isomerase
H0Y2V6	CEP170	N/A	35.0074	22.4465	N/A	N/A	N/A	H0Y2V6_HUMAN Centrosomal protein of 170 kDa (Fragment)
H0YAR2	PABPC1	9.83187	N/A	N/A	N/A	N/A	N/A	H0YAR2_HUMAN Polyadenylate-binding protein 1 (Fragment)
H0YB30	PCNXL2	N/A	5.72045	4.33868	N/A	N/A	N/A	H0YB30_HUMAN Pecanex-like protein 2 (Fragment)
H0YBE0	MTDH	14.8045	N/A	45.1268	N/A	3.04818	N/A	H0YBE0_HUMAN Protein LYRIC (Fragment)
H0YIV9		5.63855	N/A	N/A	N/A	N/A	N/A	H0YIV9_HUMAN Uncharacterized protein (Fragment)
H0YJ12	PPP2R5C	10.1799	N/A	N/A	N/A	N/A	N/A	H0YJ12_HUMAN Serine/threonine-protein phosphatase 2A 56 kDa regulatory subunit gamma isoform (Fragment)
H0YNU7	CERS2	N/A	N/A	>200	N/A	N/A	N/A	H0YNU7_HUMAN Ceramide synthase 2
H7C1R8	SLC22A5	10.7332	N/A	N/A	N/A	N/A	N/A	H7C1R8_HUMAN Solute carrier family 22 member 5 (Fragment)
I3L239	TRAP1	N/A	17.6015	N/A	N/A	N/A	N/A	I3L239_HUMAN Heat shock protein 75 kDa, mitochondrial (Fragment)
I3L2J0	CIC	N/A	126.256	N/A	N/A	N/A	N/A	I3L2J0_HUMAN Protein capicua homolog
J3KP28	SYTL2	11.1672	18.9955	N/A	1.70101	N/A	N/A	J3KP28_HUMAN Synaptotagmin-like protein 2
J3KTN0	EIF4A1	N/A	>200	38.8318	N/A	N/A	N/A	J3KTN0_HUMAN Eukaryotic initiation factor 4A-I (Fragment)
K7EMZ9	LSM14A	N/A	N/A	11.7942	N/A	N/A	N/A	K7EMZ9_HUMAN Protein LSM14 homolog A (Fragment)
O00115	DNASE2	N/A	N/A	8.40484	N/A	N/A	N/A	DNS2A_HUMAN Deoxyribonuclease-2-alpha
O00124	UBXN8	N/A	26.6288	N/A	N/A	N/A	N/A	UBXN8_HUMAN UBX domain-containing protein 8
O00139-4	KIF2A	N/A	26.6595	N/A	N/A	N/A	N/A	KIF2A_HUMAN Isoform 4 of Kinesin-like protein KIF2A
O00148	DDX39A	N/A	9.40881	20.0505	N/A	N/A	N/A	DX39A_HUMAN ATP-dependent RNA helicase DDX39A
O00151	PDLIM1	14.7635	46.5199	26.9183	3.15101	1.8233	proteasome	PDLI1_HUMAN PDZ and LIM domain protein 1
O00154	ACOT7	N/A	16.6542	>200	N/A	N/A	N/A	BACH_HUMAN Cytosolic acyl coenzyme A thioester hydrolase
O00159	MYO1C	8.69586	32.0605	11.4608	3.68686	1.31796	proteasome	MYO1C_HUMAN Unconventional myosin-Ic
O00170	AIP	11.0374	N/A	25.2881	N/A	2.29113	N/A	AIP_HUMAN AH receptor-interacting protein
O00178	GTPBP1	20.068	N/A	N/A	N/A	N/A	N/A	GTPB1_HUMAN GTP-binding protein 1
O00186	STXBP3	9.87952	17.9108	23.2991	1.81292	2.35832	lysosome	STXB3_HUMAN Syntaxin-binding protein 3
O00193	SMAP	14.1806	49.6168	N/A	3.49893	N/A	N/A	SMAP_HUMAN Small acidic protein
O00194	RAB27B	20.9031	>200	N/A	9.56795	N/A	N/A	RB27B_HUMAN Ras-related protein Rab-27B
O00203	AP3B1	13.34	20.1029	34.7094	1.50696	2.6019	lysosome	AP3B1_HUMAN AP-3 complex subunit beta-1
O00204	SULT2B1	11.9261	83.5117	N/A	7.00241	N/A	N/A	ST2B1_HUMAN Sulfotransferase family cytosolic 2B member 1
O00212	RHOD	N/A	23.6246	11.0427	N/A	N/A	N/A	RHOD_HUMAN Rho-related GTP-binding protein RhoD
O00214-2	LGALS8	6.1038	N/A	N/A	N/A	N/A	N/A	LEG8_HUMAN Isoform 2 of Galectin-8
O00231-2	PSMD11	9.66867	10.7648	4.87548	1.11337	0.504255	not certain	PSD11_HUMAN Isoform 2 of 26S proteasome non-ATPase regulatory subunit 11
O00232	PSMD12	3.25391	7.53667	2.73258	2.31619	0.839786	proteasome	PSD12_HUMAN 26S proteasome non-ATPase regulatory subunit 12
O00233	PSMD9	9.40116	N/A	22.6371	N/A	2.4079	N/A	PSMD9_HUMAN 26S proteasome non-ATPase regulatory subunit 9
O00244	ATOX1	N/A	30.2157	N/A	N/A	N/A	N/A	ATOX1_HUMAN Copper transport protein ATOX1
O00257	CBX4	4.46414	N/A	8.62982	N/A	1.93314	N/A	CBX4_HUMAN E3 SUMO-protein ligase CBX4
O00267	SUPT5H	10.7782	11.3575	25.8348	1.05374	2.39694	lysosome	SPT5H_HUMAN Transcription elongation factor SPT5
O00268	TAF4	N/A	42.8398	N/A	N/A	N/A	N/A	TAF4_HUMAN Transcription initiation factor TFIID subunit 4
O00299	CLIC1	10.2826	25.8541	10.0807	2.51436	0.980366	proteasome	CLIC1_HUMAN Chloride intracellular channel protein 1
O00391	QSOX1	N/A	N/A	2.40309	N/A	N/A	N/A	QSOX1_HUMAN Sulfhydryl oxidase 1
O00400	SLC33A1	10.4437	9.56065	49.3695	0.915448	4.72721	lysosome	ACATN_HUMAN Acetyl-coenzyme A transporter 1
O00401	WASL	N/A	14.916	N/A	N/A	N/A	N/A	WASL_HUMAN Neural Wiskott-Aldrich syndrome protein
O00410-3	IPO5	13.3374	24.9783	24.5623	1.87279	1.8416	not certain	IPO5_HUMAN Isoform 3 of Importin-5
O00422	SAP18	5.37115	9.88516	6.01586	1.84042	1.12003	not certain	SAP18_HUMAN Histone deacetylase complex subunit SAP18
O00429-6	DNM1L	19.0268	97.4891	19.7985	5.12377	1.04056	proteasome	DNM1L_HUMAN Isoform 6 of Dynamin-1-like protein
O00458	IFRD1	4.81921	N/A	6.61905	N/A	1.37347	N/A	IFRD1_HUMAN Interferon-related developmental regulator 1
O00469-2	PLOD2	N/A	8.80187	N/A	N/A	N/A	N/A	PLOD2_HUMAN Isoform 2 of Procollagen-lysine,2-oxoglutarate 5-dioxygenase 2
O00471	EXOC5	11.256	27.3863	18.4348	2.43303	1.63777	proteasome	EXOC5_HUMAN Exocyst complex component 5
O00483	NDUFA4	7.50484	10.8034	7.15618	1.43953	0.953541	not certain	NDUA4_HUMAN NADH dehydrogenase [ubiquinone] 1 alpha subcomplex subunit 4
O00487	PSMD14	6.67001	14.0826	6.39553	2.11134	0.958848	proteasome	PSDE_HUMAN 26S proteasome non-ATPase regulatory subunit 14
O00505	KPNA3	12.8384	>200	N/A	15.5782	N/A	N/A	IMA4_HUMAN Importin subunit alpha-4
O00506	STK25	8.73862	20.7157	6.08291	2.37059	0.696095	proteasome	STK25_HUMAN Serine/threonine-protein kinase 25
O00515	LAD1	17.2596	22.9443	44.1495	1.32936	2.55796	lysosome	LAD1_HUMAN Ladinin-1
O00541	PES1	8.75517	31.6506	9.3328	3.61507	1.06598	proteasome	PESC_HUMAN Pescadillo homolog
O00560	SDCBP	6.54963	9.38461	9.05956	1.43285	1.38322	not certain	SDCB1_HUMAN Syntenin-1
O00566	MPHOSPH10	10.018	22.7112	16.4682	2.26704	1.64386	proteasome	MPP10_HUMAN U3 small nucleolar ribonucleoprotein protein MPP10
O00567	NOP56	5.45699	7.16728	N/A	1.31341	N/A	N/A	NOP56_HUMAN Nucleolar protein 56
O00570	SOX1	11.6534	25.9411	6.21267	2.22605	0.533118	proteasome	SOX1_HUMAN Transcription factor SOX-1
O00571	DDX3X	8.63304	17.9154	9.40243	2.07521	1.08912	proteasome	DDX3X_HUMAN ATP-dependent RNA helicase DDX3X
O00629	KPNA4	14.6791	30.0454	32.8506	2.04681	2.23791	both	IMA3_HUMAN Importin subunit alpha-3
O00743-3	PPP6C	6.54715	14.2594	7.13849	2.17795	1.09032	proteasome	PPP6_HUMAN Isoform 3 of Serine/threonine-protein phosphatase 6 catalytic subunit
O00757	FBP2	17.0265	>200	31.8103	11.7464	1.86829	proteasome	F16P2_HUMAN Fructose-1,6-bisphosphatase isozyme 2
O00762	UBE2C	4.00478	101.042	5.26908	25.2303	1.3157	proteasome	UBE2C_HUMAN Ubiquitin-conjugating enzyme E2 C
O00767	SCD	2.71886	6.7198	2.8962	2.47155	1.06522	proteasome	ACOD_HUMAN Acyl-CoA desaturase
O14493	CLDN4	N/A	11.9797	8.83665	N/A	N/A	N/A	CLD4_HUMAN Claudin-4
O14497	ARID1A	16.4409	18.1547	23.9429	1.10424	1.4563	not certain	ARI1A_HUMAN AT-rich interactive domain-containing protein 1A
O14524	TMEM194A	N/A	58.2967	N/A	N/A	N/A	N/A	T194A_HUMAN Transmembrane protein 194A
O14530	TXNDC9	5.03156	20.0274	26.3454	3.98035	5.23603	both	TXND9_HUMAN Thioredoxin domain-containing protein 9
O14548	COX7A2L	3.73463	4.57372	4.66326	1.22468	1.24865	not certain	COX7R_HUMAN Cytochrome c oxidase subunit 7A-related protein, mitochondrial
O14562	UBFD1	11.7682	70.8739	73.1168	6.02249	6.21308	both	UBFD1_HUMAN Ubiquitin domain-containing protein UBFD1
O14569	CYB561D2	N/A	20.5012	N/A	N/A	N/A	N/A	C56D2_HUMAN Cytochrome b561 domain-containing protein 2
O14578-4	CIT	6.15912	23.5684	8.75296	3.82659	1.42114	proteasome	CTRO_HUMAN Isoform 4 of Citron Rho-interacting kinase
O14617-5	AP3D1	17.4905	13.5885	28.1424	0.776906	1.60901	not certain	AP3D1_HUMAN Isoform 5 of AP-3 complex subunit delta-1
O14641	DVL2	N/A	154.033	N/A	N/A	N/A	N/A	DVL2_HUMAN Segment polarity protein dishevelled homolog DVL-2
O14647	CHD2	6.9656	N/A	N/A	N/A	N/A	N/A	CHD2_HUMAN Chromodomain-helicase-DNA-binding protein 2
O14656	TOR1A	17.8279	20.2912	143.212	1.13817	8.03306	lysosome	TOR1A_HUMAN Torsin-1A
O14657	TOR1B	11.675	20.809	24.3637	1.78235	2.08682	lysosome	TOR1B_HUMAN Torsin-1B
O14662	STX16	N/A	7.53257	N/A	N/A	N/A	N/A	STX16_HUMAN Syntaxin-16
O14672	ADAM10	3.90176	10.7199	5.13747	2.74745	1.31671	proteasome	ADA10_HUMAN Disintegrin and metalloproteinase domain-containing protein 10
O14681	EI24	19.3077	N/A	N/A	N/A	N/A	N/A	EI24_HUMAN Etoposide-induced protein 2.4 homolog
O14683	TP53I11	N/A	37.3061	10.4975	N/A	N/A	N/A	P5I11_HUMAN Tumor protein p53-inducible protein 11
O14730	RIOK3	N/A	5.53278	N/A	N/A	N/A	N/A	RIOK3_HUMAN Serine/threonine-protein kinase RIO3
O14733-2	MAP2K7	7.60781	N/A	N/A	N/A	N/A	N/A	MP2K7_HUMAN Isoform 2 of Dual specificity mitogen-activated protein kinase kinase 7
O14734	ACOT8	N/A	63.6499	42.7078	N/A	N/A	N/A	ACOT8_HUMAN Acyl-coenzyme A thioesterase 8
O14737	PDCD5	7.66162	14.7635	6.17118	1.92694	0.805467	not certain	PDCD5_HUMAN Programmed cell death protein 5
O14744	PRMT5	7.07004	N/A	6.9287	N/A	0.980008	N/A	ANM5_HUMAN Protein arginine N-methyltransferase 5
O14745	SLC9A3R1	13.1079	N/A	20.3807	N/A	1.55484	N/A	NHRF1_HUMAN Na(+)/H(+) exchange regulatory cofactor NHE-RF1
O14753	OVOL1	3.68127	10.4374	N/A	2.83527	N/A	N/A	OVOL1_HUMAN Putative transcription factor Ovo-like 1
O14757	CHEK1	5.65419	14.645	N/A	2.59011	N/A	N/A	CHK1_HUMAN Serine/threonine-protein kinase Chk1
O14776	TCERG1	10.1978	13.1527	24.8975	1.28975	2.44145	lysosome	TCRG1_HUMAN Transcription elongation regulator 1
O14777	NDC80	4.79488	18.7034	5.57237	3.9007	1.16215	proteasome	NDC80_HUMAN Kinetochore protein NDC80 homolog
O14786	NRP1	3.2536	6.1635	4.95672	1.89436	1.52346	not certain	NRP1_HUMAN Neuropilin-1
O14787	TNPO2	16.3055	N/A	N/A	N/A	N/A	N/A	TNPO2_HUMAN Transportin-2
O14818	PSMA7	1.6054	3.29333	2.15853	2.05141	1.34454	proteasome	PSA7_HUMAN Proteasome subunit alpha type-7
O14832	PHYH	5.70445	8.26159	7.27943	1.44827	1.2761	not certain	PAHX_HUMAN Phytanoyl-CoA dioxygenase, peroxisomal
O14874	BCKDK	6.421	17.3373	12.7487	2.7001	1.98547	proteasome	BCKD_HUMAN [3-methyl-2-oxobutanoate dehydrogenase [lipoamide]] kinase, mitochondrial
O14880	MGST3	N/A	36.9678	N/A	N/A	N/A	N/A	MGST3_HUMAN Microsomal glutathione S-transferase 3
O14907	TAX1BP3	9.82351	>200	N/A	20.3593	N/A	N/A	TX1B3_HUMAN Tax1-binding protein 3
O14908	GIPC1	N/A	15.0521	9.22597	N/A	N/A	N/A	GIPC1_HUMAN PDZ domain-containing protein GIPC1
O14910	LIN7A	9.53697	N/A	5.71621	N/A	0.599373	N/A	LIN7A_HUMAN Protein lin-7 homolog A
O14929	HAT1	13.2104	12.8029	27.6374	0.969154	2.09211	lysosome	HAT1_HUMAN Histone acetyltransferase type B catalytic subunit
O14949	UQCRQ	6.3539	9.9676	4.93238	1.56874	0.776276	not certain	QCR8_HUMAN Cytochrome b-c1 complex subunit 8
O14950	MYL12B	2.62159	N/A	3.49122	N/A	1.33172	N/A	ML12B_HUMAN Myosin regulatory light chain 12B
O14964	HGS	10.0646	>200	13.7748	19.8717	1.36864	proteasome	HGS_HUMAN Hepatocyte growth factor-regulated tyrosine kinase substrate
O14965	AURKA	4.04663	18.1976	5.19834	4.49698	1.28461	proteasome	AURKA_HUMAN Aurora kinase A
O14967	CLGN	7.68371	16.8772	N/A	2.19649	N/A	N/A	CLGN_HUMAN Calmegin
O14974	PPP1R12A	10.7632	11.8954	34.5193	1.1052	3.20717	lysosome	MYPT1_HUMAN Protein phosphatase 1 regulatory subunit 12A
O14975	SLC27A2	15.2575	12.316	18.5185	0.807214	1.21373	not certain	S27A2_HUMAN Very long-chain acyl-CoA synthetase
O14976	GAK	12.3998	33.8616	47.0568	2.73083	3.79498	both	GAK_HUMAN Cyclin-G-associated kinase
O14979	HNRNPDL	9.55275	31.5497	12.73	3.30269	1.3326	proteasome	HNRDL_HUMAN Heterogeneous nuclear ribonucleoprotein D-like
O14980	XPO1	13.0046	30.1893	22.302	2.32143	1.71493	proteasome	XPO1_HUMAN Exportin-1
O15014	ZNF609	N/A	N/A	9.01831	N/A	N/A	N/A	ZN609_HUMAN Zinc finger protein 609
O15020	SPTBN2	11.9797	18.4103	41.0146	1.53679	3.42367	lysosome	SPTN2_HUMAN Spectrin beta chain, non-erythrocytic 2
O15021	MAST4	N/A	N/A	11.5795	N/A	N/A	N/A	MAST4_HUMAN Microtubule-associated serine/threonine-protein kinase 4
O15027-5	SEC16A	N/A	64.7801	N/A	N/A	N/A	N/A	SC16A_HUMAN Isoform 5 of Protein transport protein Sec16A
O15037	KHNYN	7.9244	N/A	N/A	N/A	N/A	N/A	KHNYN_HUMAN Protein KHNYN
O15042	U2SURP	7.72137	8.83215	17.597	1.14386	2.279	lysosome	SR140_HUMAN U2 snRNP-associated SURP motif-containing protein
O15090	ZNF536	3.57384	N/A	N/A	N/A	N/A	N/A	ZN536_HUMAN Zinc finger protein 536
O15091	KIAA0391	9.30899	12.6004	9.71475	1.35357	1.04359	not certain	MRRP3_HUMAN Mitochondrial ribonuclease P protein 3
O15119	TBX3	4.59647	8.01697	4.45869	1.74416	0.970024	not certain	TBX3_HUMAN T-box transcription factor TBX3
O15121	DEGS1	N/A	7.55391	N/A	N/A	N/A	N/A	DEGS1_HUMAN Sphingolipid delta(4)-desaturase DES1
O15126	SCAMP1	N/A	N/A	29.408	N/A	N/A	N/A	SCAM1_HUMAN Secretory carrier-associated membrane protein 1
O15143	ARPC1B	8.95655	16.0823	73.2714	1.79559	8.18076	lysosome	ARC1B_HUMAN Actin-related protein 2/3 complex subunit 1B
O15144	ARPC2	6.80223	8.40382	9.22106	1.23545	1.35559	not certain	ARPC2_HUMAN Actin-related protein 2/3 complex subunit 2
O15145	ARPC3	8.37438	37.286	145.01	4.45239	17.3159	both	ARPC3_HUMAN Actin-related protein 2/3 complex subunit 3
O15155	BET1	11.3892	20.2084	N/A	1.77434	N/A	N/A	BET1_HUMAN BET1 homolog
O15162	PLSCR1	11.679	10.2628	15.0586	0.878739	1.28938	not certain	PLS1_HUMAN Phospholipid scramblase 1
O15164	TRIM24	9.4152	14.8108	13.1005	1.57308	1.39142	not certain	TIF1A_HUMAN Transcription intermediary factor 1-alpha
O15169	AXIN1	N/A	>200	N/A	N/A	N/A	N/A	AXIN1_HUMAN Axin-1
O15173-2	PGRMC2	12.2205	13.7556	N/A	1.12562	N/A	N/A	PGRC2_HUMAN Isoform 2 of Membrane-associated progesterone receptor component 2
O15198	SMAD9	5.03704	29.1974	N/A	5.79655	N/A	N/A	SMAD9_HUMAN Mothers against decapentaplegic homolog 9
O15226-2	NKRF	11.1672	>200	13.1079	17.9096	1.17379	proteasome	NKRF_HUMAN Isoform 2 of NF-kappa-B-repressing factor
O15230	LAMA5	6.77431	N/A	N/A	N/A	N/A	N/A	LAMA5_HUMAN Laminin subunit alpha-5
O15231-6	ZNF185	11.8527	18.892	35.6191	1.59389	3.00514	lysosome	ZN185_HUMAN Isoform 6 of Zinc finger protein 185
O15234	CASC3	N/A	25.2789	N/A	N/A	N/A	N/A	CASC3_HUMAN Protein CASC3
O15235	MRPS12	N/A	7.28325	5.60708	N/A	N/A	N/A	RT12_HUMAN 28S ribosomal protein S12, mitochondrial
O15258	RER1	17.081	18.8868	N/A	1.10572	N/A	N/A	RER1_HUMAN Protein RER1
O15260	SURF4	N/A	20.1379	N/A	N/A	N/A	N/A	SURF4_HUMAN Surfeit locus protein 4
O15269	SPTLC1	6.56576	9.64312	11.3093	1.4687	1.72247	not certain	SPTC1_HUMAN Serine palmitoyltransferase 1
O15270	SPTLC2	10.6409	>200	31.2933	18.7954	2.94086	both	SPTC2_HUMAN Serine palmitoyltransferase 2
O15297	PPM1D	2.50405	12.3865	5.26668	4.94657	2.10326	both	PPM1D_HUMAN Protein phosphatase 1D
O15305	PMM2	10.8951	87.9628	13.9242	8.0736	1.27802	proteasome	PMM2_HUMAN Phosphomannomutase 2
O15321	TM9SF1	13.9074	17.0265	47.9687	1.22427	3.44913	lysosome	TM9S1_HUMAN Transmembrane 9 superfamily member 1
O15347	HMGB3	15.9491	125.343	16.2978	7.85895	1.02187	proteasome	HMGB3_HUMAN High mobility group protein B3
O15355	PPM1G	4.25426	6.57448	7.29629	1.54539	1.71505	not certain	PPM1G_HUMAN Protein phosphatase 1G
O15371	EIF3D	9.65655	19.1636	N/A	1.98452	N/A	N/A	EIF3D_HUMAN Eukaryotic translation initiation factor 3 subunit D
O15372	EIF3H	5.62711	10.547	10.8254	1.87432	1.92379	not certain	EIF3H_HUMAN Eukaryotic translation initiation factor 3 subunit H
O15393-2	TMPRSS2	N/A	7.22405	N/A	N/A	N/A	N/A	TMPS2_HUMAN Isoform 2 of Transmembrane protease serine 2
O15397	IPO8	11.6163	61.3405	N/A	5.28053	N/A	N/A	IPO8_HUMAN Importin-8
O15417	TNRC18	2.06423	9.17347	6.24232	4.44402	3.02405	both	TNC18_HUMAN Trinucleotide repeat-containing gene 18 protein
O15446-2	CD3EAP	15.0651	N/A	22.556	N/A	1.49723	N/A	RPA34_HUMAN Isoform 2 of DNA-directed RNA polymerase I subunit RPA34
O15460	P4HA2	2.98964	6.90317	14.8585	2.30903	4.96999	both	P4HA2_HUMAN Prolyl 4-hydroxylase subunit alpha-2
O15498	YKT6	14.5895	N/A	16.2482	N/A	1.11369	N/A	YKT6_HUMAN Synaptobrevin homolog YKT6
O15511-2	ARPC5	3.69481	11.9385	5.66667	3.23114	1.53368	proteasome	ARPC5_HUMAN Isoform 2 of Actin-related protein 2/3 complex subunit 5
O15530	PDPK1	10.6148	N/A	N/A	N/A	N/A	N/A	PDPK1_HUMAN 3-phosphoinositide-dependent protein kinase 1
O15541	RNF113A	N/A	N/A	19.878	N/A	N/A	N/A	R113A_HUMAN RING finger protein 113A
O15551	CLDN3	8.97626	N/A	10.9415	N/A	1.21894	N/A	CLD3_HUMAN Claudin-3
O43143	DHX15	14.9708	15.2508	62.502	1.0187	4.17493	lysosome	DHX15_HUMAN Putative pre-mRNA-splicing factor ATP-dependent RNA helicase DHX15
O43148-2	RNMT	13.5143	18.7135	26.9812	1.38472	1.9965	not certain	MCES_HUMAN Isoform 2 of mRNA cap guanine-N7 methyltransferase
O43166	SIPA1L1	10.5182	N/A	9.27535	N/A	0.881841	N/A	SI1L1_HUMAN Signal-induced proliferation-associated 1-like protein 1
O43169	CYB5B	N/A	142.33	N/A	N/A	N/A	N/A	CYB5B_HUMAN Cytochrome b5 type B
O43172	PRPF4	13.0906	23.8852	31.3641	1.8246	2.39593	lysosome	PRP4_HUMAN U4/U6 small nuclear ribonucleoprotein Prp4
O43175	PHGDH	8.82878	69.8737	18.313	7.91431	2.07424	both	SERA_HUMAN D-3-phosphoglycerate dehydrogenase
O43181	NDUFS4	7.46926	17.5658	12.4131	2.35175	1.66189	proteasome	NDUS4_HUMAN NADH dehydrogenase [ubiquinone] iron-sulfur protein 4, mitochondrial
O43242	PSMD3	14.7761	32.588	31.3925	2.20545	2.12455	both	PSMD3_HUMAN 26S proteasome non-ATPase regulatory subunit 3
O43251-8	RBFOX2	19.3887	N/A	N/A	N/A	N/A	N/A	RFOX2_HUMAN Isoform 8 of RNA binding protein fox-1 homolog 2
O43252	PAPSS1	N/A	21.8383	37.5893	N/A	N/A	N/A	PAPS1_HUMAN Bifunctional 3'-phosphoadenosine 5'-phosphosulfate synthase 1
O43255	SIAH2	N/A	17.9805	N/A	N/A	N/A	N/A	SIAH2_HUMAN E3 ubiquitin-protein ligase SIAH2
O43290	SART1	11.0673	61.2862	29.4705	5.53758	2.66284	both	SNUT1_HUMAN U4/U6.U5 tri-snRNP-associated protein 1
O43293	DAPK3	2.88775	N/A	3.728	N/A	1.29097	N/A	DAPK3_HUMAN Death-associated protein kinase 3
O43298	ZBTB43	N/A	>200	11.6417	N/A	N/A	N/A	ZBT43_HUMAN Zinc finger and BTB domain-containing protein 43
O43347	MSI1	N/A	N/A	14.1893	N/A	N/A	N/A	MSI1H_HUMAN RNA-binding protein Musashi homolog 1
O43390	HNRNPR	13.4123	17.8004	N/A	1.32717	N/A	N/A	HNRPR_HUMAN Heterogeneous nuclear ribonucleoprotein R
O43390-2	HNRNPR	12.6418	17.2855	23.9843	1.36733	1.89723	not certain	HNRPR_HUMAN Isoform 2 of Heterogeneous nuclear ribonucleoprotein R
O43395	PRPF3	9.19903	26.2159	10.6835	2.84985	1.16137	proteasome	PRPF3_HUMAN U4/U6 small nuclear ribonucleoprotein Prp3
O43396	TXNL1	12.3843	>200	22.0467	16.1495	1.78022	proteasome	TXNL1_HUMAN Thioredoxin-like protein 1
O43399-7	TPD52L2	N/A	13.8546	N/A	N/A	N/A	N/A	TPD54_HUMAN Isoform 7 of Tumor protein D54
O43402	EMC8	16.906	27.8037	14.9934	1.6446	0.88687	not certain	EMC8_HUMAN ER membrane protein complex subunit 8
O43414	ERI3	N/A	34.814	11.2524	N/A	N/A	N/A	ERI3_HUMAN ERI1 exoribonuclease 3
O43427	FIBP	3.58105	11.8771	4.66892	3.31666	1.30379	proteasome	FIBP_HUMAN Acidic fibroblast growth factor intracellular-binding protein
O43432-3	EIF4G3	6.54345	47.3138	8.5007	7.23072	1.29912	proteasome	IF4G3_HUMAN Isoform 3 of Eukaryotic translation initiation factor 4 gamma 3
O43447	PPIH	16.0228	17.2339	30.9579	1.07558	1.93211	not certain	PPIH_HUMAN Peptidyl-prolyl cis-trans isomerase H
O43482	OIP5	N/A	>200	N/A	N/A	N/A	N/A	MS18B_HUMAN Protein Mis18-beta
O43488	AKR7A2	16.9931	64.1209	22.5634	3.77336	1.3278	proteasome	ARK72_HUMAN Aflatoxin B1 aldehyde reductase member 2
O43491	EPB41L2	N/A	56.7224	32.6802	N/A	N/A	N/A	E41L2_HUMAN Band 4.1-like protein 2
O43505	B3GNT1	8.95539	26.5269	9.86827	2.96211	1.10194	proteasome	B3GN1_HUMAN N-acetyllactosaminide beta-1,3-N-acetylglucosaminyltransferase
O43524	FOXO3	5.56566	21.8935	5.7494	3.93367	1.03301	proteasome	FOXO3_HUMAN Forkhead box protein O3
O43583	DENR	14.0171	>200	N/A	14.2683	N/A	N/A	DENR_HUMAN Density-regulated protein
O43615	TIMM44	12.0547	18.6581	28.0286	1.54778	2.32511	lysosome	TIM44_HUMAN Mitochondrial import inner membrane translocase subunit TIM44
O43617	TRAPPC3	6.27794	N/A	6.15092	N/A	0.979768	N/A	TPPC3_HUMAN Trafficking protein particle complex subunit 3
O43633	CHMP2A	9.03006	>200	6.80356	22.1483	0.753435	proteasome	CHM2A_HUMAN Charged multivesicular body protein 2a
O43657	TSPAN6	6.88671	N/A	11.2927	N/A	1.63978	N/A	TSN6_HUMAN Tetraspanin-6
O43660	PLRG1	N/A	N/A	43.6216	N/A	N/A	N/A	PLRG1_HUMAN Pleiotropic regulator 1
O43663	PRC1	6.1471	14.2652	7.80044	2.32064	1.26896	proteasome	PRC1_HUMAN Protein regulator of cytokinesis 1
O43665-3	RGS10	9.95472	N/A	6.85334	N/A	0.688452	N/A	RGS10_HUMAN Isoform 3 of Regulator of G-protein signaling 10
O43670-4	ZNF207	10.0998	18.1215	12.4175	1.79425	1.22949	not certain	ZN207_HUMAN Isoform 4 of Zinc finger protein 207
O43674	NDUFB5	6.18716	10.4737	8.58599	1.69281	1.38771	not certain	NDUB5_HUMAN NADH dehydrogenase [ubiquinone] 1 beta subcomplex subunit 5, mitochondrial
O43681	ASNA1	18.3372	46.8976	N/A	2.55751	N/A	N/A	ASNA_HUMAN ATPase ASNA1
O43683	BUB1	N/A	N/A	4.01661	N/A	N/A	N/A	BUB1_HUMAN Mitotic checkpoint serine/threonine-protein kinase BUB1
O43684	BUB3	13.0536	N/A	49.8667	N/A	3.82014	N/A	BUB3_HUMAN Mitotic checkpoint protein BUB3
O43707	ACTN4	16.6943	58.1499	>200	3.48322	11.9801	both	ACTN4_HUMAN Alpha-actinin-4
O43708	GSTZ1	12.8147	N/A	N/A	N/A	N/A	N/A	MAAI_HUMAN Maleylacetoacetate isomerase
O43709	WBSCR22	5.42793	6.93633	5.70867	1.27789	1.05172	not certain	WBS22_HUMAN Ribosome biogenesis methyltransferase WBSCR22
O43719	HTATSF1	14.2799	N/A	N/A	N/A	N/A	N/A	HTSF1_HUMAN HIV Tat-specific factor 1
O43747-2	AP1G1	8.01141	16.8854	9.05365	2.10767	1.13009	proteasome	AP1G1_HUMAN Isoform 2 of AP-1 complex subunit gamma-1
O43752	STX6	N/A	37.8769	16.3671	N/A	N/A	N/A	STX6_HUMAN Syntaxin-6
O43768-4	ENSA	7.01921	38.7666	10.3842	5.52293	1.4794	proteasome	ENSA_HUMAN Isoform 4 of Alpha-endosulfine
O43776	NARS	17.6553	15.2709	16.317	0.864948	0.9242	not certain	SYNC_HUMAN Asparagine--tRNA ligase, cytoplasmic
O43795	MYO1B	11.4855	27.6816	18.3082	2.41014	1.59403	proteasome	MYO1B_HUMAN Unconventional myosin-Ib
O43809	NUDT21	34.849	34.5021	16.9267	0.990045	0.485714	not certain	CPSF5_HUMAN Cleavage and polyadenylation specificity factor subunit 5
O43813	LANCL1	N/A	21.7424	N/A	N/A	N/A	N/A	LANC1_HUMAN LanC-like protein 1
O43823	AKAP8	N/A	N/A	19.0112	N/A	N/A	N/A	AKAP8_HUMAN A-kinase anchor protein 8
O43824	GTPBP6	N/A	21.0427	N/A	N/A	N/A	N/A	GTPB6_HUMAN Putative GTP-binding protein 6
O43837	IDH3B	11.7682	11.1456	N/A	0.947098	N/A	N/A	IDH3B_HUMAN Isocitrate dehydrogenase [NAD] subunit beta, mitochondrial
O43865	AHCYL1	5.97489	19.2916	12.621	3.22878	2.11235	both	SAHH2_HUMAN Putative adenosylhomocysteinase 2
O43913	ORC5	N/A	15.2945	8.18646	N/A	N/A	N/A	ORC5_HUMAN Origin recognition complex subunit 5
O43920	NDUFS5	N/A	N/A	3.78686	N/A	N/A	N/A	NDUS5_HUMAN NADH dehydrogenase [ubiquinone] iron-sulfur protein 5
O43933	PEX1	6.89424	30.4948	7.11577	4.42323	1.03213	proteasome	PEX1_HUMAN Peroxisome biogenesis factor 1
O60216	RAD21	7.15396	13.7175	N/A	1.91747	N/A	N/A	RAD21_HUMAN Double-strand-break repair protein rad21 homolog
O60231	DHX16	N/A	N/A	>200	N/A	N/A	N/A	DHX16_HUMAN Putative pre-mRNA-splicing factor ATP-dependent RNA helicase DHX16
O60237	PPP1R12B	14.4195	N/A	N/A	N/A	N/A	N/A	MYPT2_HUMAN Protein phosphatase 1 regulatory subunit 12B
O60238	BNIP3L	2.46295	9.77365	3.96152	3.96827	1.60845	proteasome	BNI3L_HUMAN BCL2/adenovirus E1B 19 kDa protein-interacting protein 3-like
O60239	SH3BP5	N/A	8.06736	N/A	N/A	N/A	N/A	3BP5_HUMAN SH3 domain-binding protein 5
O60264	SMARCA5	5.18202	9.21003	N/A	1.77731	N/A	N/A	SMCA5_HUMAN SWI/SNF-related matrix-associated actin-dependent regulator of chromatin subfamily A member 5
O60271	SPAG9	10.9174	N/A	11.7702	N/A	1.07811	N/A	JIP4_HUMAN C-Jun-amino-terminal kinase-interacting protein 4
O60292	SIPA1L3	17.6733	N/A	21.5934	N/A	1.22181	N/A	SI1L3_HUMAN Signal-induced proliferation-associated 1-like protein 3
O60293	ZFC3H1	N/A	N/A	8.92656	N/A	N/A	N/A	ZC3H1_HUMAN Zinc finger C3H1 domain-containing protein
O60306	AQR	N/A	6.85809	N/A	N/A	N/A	N/A	AQR_HUMAN Intron-binding protein aquarius
O60313-2	OPA1	12.5707	26.3855	20.4227	2.09897	1.62463	proteasome	OPA1_HUMAN Isoform 2 of Dynamin-like 120 kDa protein, mitochondrial
O60333-3	KIF1B	6.38904	N/A	N/A	N/A	N/A	N/A	KIF1B_HUMAN Isoform 3 of Kinesin-like protein KIF1B
O60333-4	KIF1B	6.96071	N/A	N/A	N/A	N/A	N/A	KIF1B_HUMAN Isoform 4 of Kinesin-like protein KIF1B
O60341-2	KDM1A	N/A	11.5737	N/A	N/A	N/A	N/A	KDM1A_HUMAN Isoform 2 of Lysine-specific histone demethylase 1A
O60353	FZD6	N/A	18.313	N/A	N/A	N/A	N/A	FZD6_HUMAN Frizzled-6
O60437	PPL	9.74069	N/A	N/A	N/A	N/A	N/A	PEPL_HUMAN Periplakin
O60476	MAN1A2	9.79298	N/A	N/A	N/A	N/A	N/A	MA1A2_HUMAN Mannosyl-oligosaccharide 1,2-alpha-mannosidase IB
O60493	SNX3	6.9204	70.2989	4.61636	10.1582	0.667066	proteasome	SNX3_HUMAN Sorting nexin-3
O60499	STX10	N/A	19.8382	N/A	N/A	N/A	N/A	STX10_HUMAN Syntaxin-10
O60502	MGEA5	3.59647	5.64912	N/A	1.57074	N/A	N/A	NCOAT_HUMAN Bifunctional protein NCOAT
O60506	SYNCRIP	14.8362	19.9639	44.8059	1.34562	3.02004	lysosome	HNRPQ_HUMAN Heterogeneous nuclear ribonucleoprotein Q
O60508	CDC40	4.10171	N/A	N/A	N/A	N/A	N/A	PRP17_HUMAN Pre-mRNA-processing factor 17
O60513	B4GALT4	7.57869	N/A	9.77365	N/A	1.28962	N/A	B4GT4_HUMAN Beta-1,4-galactosyltransferase 4
O60524	NEMF	N/A	22.1949	N/A	N/A	N/A	N/A	NEMF_HUMAN Nuclear export mediator factor NEMF
O60563	CCNT1	14.3005	N/A	31.1527	N/A	2.17843	N/A	CCNT1_HUMAN Cyclin-T1
O60573	EIF4E2	N/A	16.4526	8.03183	N/A	N/A	N/A	IF4E2_HUMAN Eukaryotic translation initiation factor 4E type 2
O60610	DIAPH1	5.61253	43.0794	N/A	7.67557	N/A	N/A	DIAP1_HUMAN Protein diaphanous homolog 1
O60645	EXOC3	12.1647	N/A	32.3749	N/A	2.66137	N/A	EXOC3_HUMAN Exocyst complex component 3
O60664	PLIN3	8.35117	>200	23.9843	23.9487	2.87197	both	PLIN3_HUMAN Perilipin-3
O60669	SLC16A7	5.20889	13.6259	N/A	2.61588	N/A	N/A	MOT2_HUMAN Monocarboxylate transporter 2
O60675	MAFK	N/A	30.1368	N/A	N/A	N/A	N/A	MAFK_HUMAN Transcription factor MafK
O60678	PRMT3	10.7715	N/A	N/A	N/A	N/A	N/A	ANM3_HUMAN Protein arginine N-methyltransferase 3
O60684	KPNA6	11.2214	37.4472	27.8261	3.33712	2.47973	both	IMA7_HUMAN Importin subunit alpha-7
O60701	UGDH	15.9528	14.945	>200	0.936826	12.537	lysosome	UGDH_HUMAN UDP-glucose 6-dehydrogenase
O60716	CTNND1	10.1799	20.0447	22.6964	1.96906	2.22954	lysosome	CTND1_HUMAN Catenin delta-1
O60716-3	CTNND1	N/A	>200	N/A	N/A	N/A	N/A	CTND1_HUMAN Isoform 1AC of Catenin delta-1
O60749	SNX2	13.6178	22.8761	10.5921	1.67987	0.777812	not certain	SNX2_HUMAN Sorting nexin-2
O60762	DPM1	11.8588	18.2263	16.5627	1.53694	1.39665	not certain	DPM1_HUMAN Dolichol-phosphate mannosyltransferase
O60763-2	USO1	N/A	16.2026	N/A	N/A	N/A	N/A	USO1_HUMAN Isoform 2 of General vesicular transport factor p115
O60825	PFKFB2	14.4466	N/A	N/A	N/A	N/A	N/A	F262_HUMAN 6-phosphofructo-2-kinase/fructose-2,6-bisphosphatase 2
O60832	DKC1	3.90682	5.92687	5.51123	1.51706	1.41067	not certain	DKC1_HUMAN H/ACA ribonucleoprotein complex subunit 4
O60841	EIF5B	10.0151	28.338	19.3346	2.82952	1.93054	proteasome	IF2P_HUMAN Eukaryotic translation initiation factor 5B
O60870	KIN	7.97913	N/A	14.3896	N/A	1.8034	N/A	KIN17_HUMAN DNA/RNA-binding protein KIN17
O60884	DNAJA2	11.0939	47.1208	18.1738	4.24745	1.63818	proteasome	DNJA2_HUMAN DnaJ homolog subfamily A member 2
O60885	BRD4	5.78925	45.4523	8.02068	7.85115	1.38544	proteasome	BRD4_HUMAN Bromodomain-containing protein 4
O60911	CTSV	2.21439	5.03741	7.8366	2.27485	3.53895	both	CATL2_HUMAN Cathepsin L2
O60925	PFDN1	14.6203	27.9382	N/A	1.91092	N/A	N/A	PFD1_HUMAN Prefoldin subunit 1
O60930	RNASEH1	3.42346	N/A	N/A	N/A	N/A	N/A	RNH1_HUMAN Ribonuclease H1
O60934	NBN	9.023	N/A	N/A	N/A	N/A	N/A	NBN_HUMAN Nibrin
O60942	RNGTT	N/A	N/A	>200	N/A	N/A	N/A	MCE1_HUMAN mRNA-capping enzyme
O75044	SRGAP2	N/A	40.9661	N/A	N/A	N/A	N/A	SRGP2_HUMAN SLIT-ROBO Rho GTPase-activating protein 2
O75083	WDR1	10.5038	N/A	N/A	N/A	N/A	N/A	WDR1_HUMAN WD repeat-containing protein 1
O75110	ATP9A	6.10487	N/A	N/A	N/A	N/A	N/A	ATP9A_HUMAN Probable phospholipid-transporting ATPase IIA
O75112-7	LDB3	11.0904	29.1238	14.2887	2.62605	1.28839	proteasome	LDB3_HUMAN Isoform 7 of LIM domain-binding protein 3
O75116	ROCK2	5.84737	25.5021	N/A	4.3613	N/A	N/A	ROCK2_HUMAN Rho-associated protein kinase 2
O75122	CLASP2	15.4101	23.1744	21.6812	1.50384	1.40694	not certain	CLAP2_HUMAN CLIP-associating protein 2
O75127	PTCD1	7.56381	9.55011	6.11025	1.26261	0.807828	not certain	PTCD1_HUMAN Pentatricopeptide repeat-containing protein 1, mitochondrial
O75128-2	COBL	13.3786	25.8541	15.3453	1.93249	1.147	not certain	COBL_HUMAN Isoform 2 of Protein cordon-bleu
O75131	CPNE3	13.9691	45.2151	17.0348	3.23679	1.21946	proteasome	CPNE3_HUMAN Copine-3
O75146	HIP1R	14.3717	59.7026	65.6389	4.15418	4.56723	both	HIP1R_HUMAN Huntingtin-interacting protein 1-related protein
O75150	RNF40	N/A	11.3575	13.3016	N/A	N/A	N/A	BRE1B_HUMAN E3 ubiquitin-protein ligase BRE1B
O75151	PHF2	12.8958	N/A	N/A	N/A	N/A	N/A	PHF2_HUMAN Lysine-specific demethylase PHF2
O75152	ZC3H11A	9.97334	>200	18.892	20.0535	1.89425	proteasome	ZC11A_HUMAN Zinc finger CCCH domain-containing protein 11A
O75153	CLUH	N/A	27.4949	20.2438	N/A	N/A	N/A	CLU_HUMAN Clustered mitochondria protein homolog
O75155	CAND2	14.773	133.042	23.5045	9.00576	1.59105	proteasome	CAND2_HUMAN Cullin-associated NEDD8-dissociated protein 2
O75165	DNAJC13	N/A	99.1627	N/A	N/A	N/A	N/A	DJC13_HUMAN DnaJ homolog subfamily C member 13
O75175	CNOT3	6.14492	29.6597	8.25962	4.8267	1.34414	proteasome	CNOT3_HUMAN CCR4-NOT transcription complex subunit 3
O75179	ANKRD17	N/A	26.4863	12.3468	N/A	N/A	N/A	ANR17_HUMAN Ankyrin repeat domain-containing protein 17
O75190	DNAJB6	6.57261	10.7166	4.39786	1.63049	0.66912	not certain	DNJB6_HUMAN DnaJ homolog subfamily B member 6
O75190-2	DNAJB6	4.58643	18.7286	4.38423	4.08349	0.955914	proteasome	DNJB6_HUMAN Isoform B of DnaJ homolog subfamily B member 6
O75208	COQ9	10.2765	N/A	24.076	N/A	2.34283	N/A	COQ9_HUMAN Ubiquinone biosynthesis protein COQ9, mitochondrial
O75306	NDUFS2	6.44968	N/A	5.61026	N/A	0.86985	N/A	NDUS2_HUMAN NADH dehydrogenase [ubiquinone] iron-sulfur protein 2, mitochondrial
O75319	DUSP11	4.69867	8.10793	5.19406	1.72558	1.10543	not certain	DUS11_HUMAN RNA/RNP complex-1-interacting phosphatase
O75323	GBAS	15.7105	156.821	18.3615	9.9819	1.16874	proteasome	NIPS2_HUMAN Protein NipSnap homolog 2
O75330-3	HMMR	3.3738	15.5624	8.26553	4.61271	2.44992	both	HMMR_HUMAN Isoform 3 of Hyaluronan mediated motility receptor
O75334	PPFIA2	13.0659	44.8059	N/A	3.42922	N/A	N/A	LIPA2_HUMAN Liprin-alpha-2
O75340	PDCD6	N/A	50.0467	35.8586	N/A	N/A	N/A	PDCD6_HUMAN Programmed cell death protein 6
O75347	TBCA	N/A	>200	N/A	N/A	N/A	N/A	TBCA_HUMAN Tubulin-specific chaperone A
O75348	ATP6V1G1	N/A	5.48202	2.40292	N/A	N/A	N/A	VATG1_HUMAN V-type proton ATPase subunit G 1
O75351	VPS4B	9.43956	>200	10.3254	21.1874	1.09385	proteasome	VPS4B_HUMAN Vacuolar protein sorting-associated protein 4B
O75352	MPDU1	13.65	41.5556	21.03	3.04436	1.54066	proteasome	MPU1_HUMAN Mannose-P-dolichol utilization defect 1 protein
O75362	ZNF217	3.7784	9.71202	3.69442	2.57041	0.977774	proteasome	ZN217_HUMAN Zinc finger protein 217
O75367	H2AFY	14.9289	N/A	N/A	N/A	N/A	N/A	H2AY_HUMAN Core histone macro-H2A.1
O75368	SH3BGRL	N/A	161.197	7.63042	N/A	N/A	N/A	SH3L1_HUMAN SH3 domain-binding glutamic acid-rich-like protein
O75369-8	FLNB	12.3512	33.3404	22.117	2.69937	1.79068	proteasome	FLNB_HUMAN Isoform 8 of Filamin-B
O75376	NCOR1	9.61103	N/A	10.8321	N/A	1.12705	N/A	NCOR1_HUMAN Nuclear receptor corepressor 1
O75386	TULP3	4.3414	32.4659	N/A	7.47822	N/A	N/A	TULP3_HUMAN Tubby-related protein 3
O75390	CS	15.0455	26.5269	33.3886	1.76311	2.21917	lysosome	CISY_HUMAN Citrate synthase, mitochondrial
O75391	SPAG7	9.66463	54.7077	7.03846	5.66062	0.72827	proteasome	SPAG7_HUMAN Sperm-associated antigen 7
O75394	MRPL33	9.01831	N/A	8.71226	N/A	0.966063	N/A	RM33_HUMAN 39S ribosomal protein L33, mitochondrial
O75396	SEC22B	11.4969	26.7315	14.1257	2.32511	1.22865	proteasome	SC22B_HUMAN Vesicle-trafficking protein SEC22b
O75400	PRPF40A	9.37699	23.1744	22.2591	2.47141	2.3738	both	PR40A_HUMAN Pre-mRNA-processing factor 40 homolog A
O75431	MTX2	7.84014	15.7964	8.61052	2.01481	1.09826	proteasome	MTX2_HUMAN Metaxin-2
O75436	VPS26A	15.2073	56.9554	N/A	3.74528	N/A	N/A	VP26A_HUMAN Vacuolar protein sorting-associated protein 26A
O75438-2	NDUFB1	1.55883	3.771	1.9586	2.41913	1.25646	proteasome	NDUB1_HUMAN Isoform 2 of NADH dehydrogenase [ubiquinone] 1 beta subcomplex subunit 1
O75439	PMPCB	8.27638	9.61369	15.6361	1.16158	1.88924	not certain	MPPB_HUMAN Mitochondrial-processing peptidase subunit beta
O75449	KATNA1	6.41387	N/A	N/A	N/A	N/A	N/A	KTNA1_HUMAN Katanin p60 ATPase-containing subunit A1
O75475	PSIP1	13.4959	23.7868	12.0046	1.76253	0.889505	not certain	PSIP1_HUMAN PC4 and SFRS1-interacting protein
O75489	NDUFS3	N/A	N/A	2.55831	N/A	N/A	N/A	NDUS3_HUMAN NADH dehydrogenase [ubiquinone] iron-sulfur protein 3, mitochondrial
O75496	GMNN	5.45399	N/A	N/A	N/A	N/A	N/A	GEMI_HUMAN Geminin
O75521	ECI2	16.5271	35.4732	38.9627	2.14637	2.3575	both	ECI2_HUMAN Enoyl-CoA delta isomerase 2, mitochondrial
O75526	RBMXL2	38.0223	>200	N/A	5.26007	N/A	N/A	RMXL2_HUMAN RNA-binding motif protein, X-linked-like-2
O75528	TADA3	3.48105	11.6829	4.59251	3.35614	1.31929	proteasome	TADA3_HUMAN Transcriptional adapter 3
O75530-2	EED	5.62118	9.60437	9.02888	1.7086	1.60623	not certain	EED_HUMAN Isoform 2 of Polycomb protein EED
O75531	BANF1	16.4409	N/A	N/A	N/A	N/A	N/A	BAF_HUMAN Barrier-to-autointegration factor
O75533	SF3B1	9.90493	29.6851	27.9157	2.997	2.81836	both	SF3B1_HUMAN Splicing factor 3B subunit 1
O75534-3	CSDE1	2.19782	15.0947	3.28615	6.86803	1.49519	proteasome	CSDE1_HUMAN Isoform 3 of Cold shock domain-containing protein E1
O75582	RPS6KA5	8.67084	14.2652	N/A	1.64519	N/A	N/A	KS6A5_HUMAN Ribosomal protein S6 kinase alpha-5
O75608	LYPLA1	12.1861	44.922	18.0085	3.68633	1.47779	proteasome	LYPA1_HUMAN Acyl-protein thioesterase 1
O75616	ERAL1	11.0058	18.8611	15.026	1.71374	1.36527	not certain	ERAL1_HUMAN GTPase Era, mitochondrial
O75643	SNRNP200	3.48385	6.89219	4.12563	1.97832	1.18422	not certain	U520_HUMAN U5 small nuclear ribonucleoprotein 200 kDa helicase
O75648	TRMU	14.1228	84.7368	24.398	6	1.72756	proteasome	MTU1_HUMAN Mitochondrial tRNA-specific 2-thiouridylase 1
O75674	TOM1L1	5.72565	N/A	N/A	N/A	N/A	N/A	TM1L1_HUMAN TOM1-like protein 1
O75676	RPS6KA4	6.68416	N/A	9.20025	N/A	1.37643	N/A	KS6A4_HUMAN Ribosomal protein S6 kinase alpha-4
O75683	SURF6	7.58201	>200	15.0227	26.3782	1.98136	proteasome	SURF6_HUMAN Surfeit locus protein 6
O75688	PPM1B	N/A	39.3163	N/A	N/A	N/A	N/A	PPM1B_HUMAN Protein phosphatase 1B
O75691	UTP20	9.08569	18.3324	N/A	2.01772	N/A	N/A	UTP20_HUMAN Small subunit processome component 20 homolog
O75694	NUP155	10.2537	14.4255	11.6711	1.40687	1.13824	not certain	NU155_HUMAN Nuclear pore complex protein Nup155
O75717	WDHD1	12.2768	57.3323	16.7346	4.66998	1.36311	proteasome	WDHD1_HUMAN WD repeat and HMG-box DNA-binding protein 1
O75718	CRTAP	3.14467	6.47015	4.17735	2.0575	1.32839	proteasome	CRTAP_HUMAN Cartilage-associated protein
O75746	SLC25A12	12.4532	N/A	40.6062	N/A	3.26069	N/A	CMC1_HUMAN Calcium-binding mitochondrial carrier protein Aralar1
O75787	ATP6AP2	5.30213	9.11796	2.73668	1.71968	0.516148	not certain	RENR_HUMAN Renin receptor
O75792	RNASEH2A	N/A	7.85881	2.33077	N/A	N/A	N/A	RNH2A_HUMAN Ribonuclease H2 subunit A
O75794	CDC123	N/A	>200	6.98455	N/A	N/A	N/A	CD123_HUMAN Cell division cycle protein 123 homolog
O75815	BCAR3	N/A	12.4042	N/A	N/A	N/A	N/A	BCAR3_HUMAN Breast cancer anti-estrogen resistance protein 3
O75821	EIF3G	14.8712	>200	25.2054	13.4488	1.69491	proteasome	EIF3G_HUMAN Eukaryotic translation initiation factor 3 subunit G
O75822	EIF3J	25.2054	41.8567	77.9693	1.66063	3.09336	lysosome	EIF3J_HUMAN Eukaryotic translation initiation factor 3 subunit J
O75828	CBR3	20.8152	N/A	N/A	N/A	N/A	N/A	CBR3_HUMAN Carbonyl reductase [NADPH] 3
O75832	PSMD10	12.903	>200	N/A	15.5003	N/A	N/A	PSD10_HUMAN 26S proteasome non-ATPase regulatory subunit 10
O75844	ZMPSTE24	21.1713	28.6306	>200	1.35233	9.44677	lysosome	FACE1_HUMAN CAAX prenyl protease 1 homolog
O75845	SC5D	7.28172	N/A	9.76401	N/A	1.34089	N/A	SC5D_HUMAN Lathosterol oxidase
O75874	IDH1	12.3843	80.1326	10.7615	6.47052	0.868964	proteasome	IDHC_HUMAN Isocitrate dehydrogenase [NADP] cytoplasmic
O75879	PET112	9.08093	78.4103	N/A	8.63462	N/A	N/A	GATB_HUMAN Glutamyl-tRNA(Gln) amidotransferase subunit B, mitochondrial
O75880	SCO1	N/A	52.4714	N/A	N/A	N/A	N/A	SCO1_HUMAN Protein SCO1 homolog, mitochondrial
O75884	RBBP9	13.4097	>200	13.2331	14.9146	0.986827	proteasome	RBBP9_HUMAN Putative hydrolase RBBP9
O75909-4	CCNK	10.4186	11.8487	12.4488	1.13726	1.19486	not certain	CCNK_HUMAN Isoform 4 of Cyclin-K
O75914-3	PAK3	14.6388	N/A	29.1238	N/A	1.9895	N/A	PAK3_HUMAN Isoform 3 of Serine/threonine-protein kinase PAK 3
O75915	ARL6IP5	11.2396	37.2259	10.7232	3.31203	0.954053	proteasome	PRAF3_HUMAN PRA1 family protein 3
O75923-13	DYSF	11.6829	N/A	N/A	N/A	N/A	N/A	DYSF_HUMAN Isoform 13 of Dysferlin
O75925	PIAS1	N/A	15.5939	5.55584	N/A	N/A	N/A	PIAS1_HUMAN E3 SUMO-protein ligase PIAS1
O75928	PIAS2	N/A	11.8914	N/A	N/A	N/A	N/A	PIAS2_HUMAN E3 SUMO-protein ligase PIAS2
O75934	BCAS2	1.73878	5.93194	2.02734	3.41155	1.16595	proteasome	SPF27_HUMAN Pre-mRNA-splicing factor SPF27
O75937	DNAJC8	15.8724	23.9429	39.6992	1.50846	2.50115	lysosome	DNJC8_HUMAN DnaJ homolog subfamily C member 8
O75940	SMNDC1	9.89927	25.4086	12.199	2.56672	1.23231	proteasome	SPF30_HUMAN Survival of motor neuron-related-splicing factor 30
O75947	ATP5H	8.71774	15.6114	13.4383	1.79077	1.54149	not certain	ATP5H_HUMAN ATP synthase subunit d, mitochondrial
O75955	FLOT1	4.55209	11.5602	5.29565	2.53953	1.16334	proteasome	FLOT1_HUMAN Flotillin-1
O75956	CDK2AP2	N/A	21.8108	N/A	N/A	N/A	N/A	CDKA2_HUMAN Cyclin-dependent kinase 2-associated protein 2
O75962	TRIO	10.1116	N/A	N/A	N/A	N/A	N/A	TRIO_HUMAN Triple functional domain protein
O75964	ATP5L	3.89606	6.66937	5.42623	1.71183	1.39275	not certain	ATP5L_HUMAN ATP synthase subunit g, mitochondrial
O76003	GLRX3	14.9321	30.2552	17.9665	2.02619	1.20321	proteasome	GLRX3_HUMAN Glutaredoxin-3
O76021	RSL1D1	16.6103	>200	61.4492	12.0407	3.69947	both	RL1D1_HUMAN Ribosomal L1 domain-containing protein 1
O76031	CLPX	10.9519	20.6663	>200	1.887	18.2616	lysosome	CLPX_HUMAN ATP-dependent Clp protease ATP-binding subunit clpX-like, mitochondrial
O76041	NEBL	N/A	N/A	16.0302	N/A	N/A	N/A	NEBL_HUMAN Nebulette
O76041-2	NEBL	12.8076	36.0451	10.3889	2.81435	0.811151	proteasome	NEBL_HUMAN Isoform 2 of Nebulette
O76062	TM7SF2	6.91419	12.3865	9.98052	1.79146	1.44348	not certain	ERG24_HUMAN Delta(14)-sterol reductase
O76080	ZFAND5	1.76661	43.4848	2.94705	24.6148	1.6682	proteasome	ZFAN5_HUMAN AN1-type zinc finger protein 5
O76094	SRP72	10.8034	20.9031	18.8049	1.93486	1.74064	not certain	SRP72_HUMAN Signal recognition particle subunit SRP72
O76095	JTB	8.29421	13.0462	N/A	1.57293	N/A	N/A	JTB_HUMAN Protein JTB
O94776	MTA2	6.02265	10.6868	13.6608	1.77444	2.26823	lysosome	MTA2_HUMAN Metastasis-associated protein MTA2
O94804	STK10	17.8004	N/A	44.5181	N/A	2.50096	N/A	STK10_HUMAN Serine/threonine-protein kinase 10
O94822-3	LTN1	5.442	35.8586	N/A	6.58924	N/A	N/A	LTN1_HUMAN Isoform 3 of E3 ubiquitin-protein ligase listerin
O94826	TOMM70A	11.9797	25.1962	61.3405	2.10324	5.12035	both	TOM70_HUMAN Mitochondrial import receptor subunit TOM70
O94832	MYO1D	N/A	N/A	8.86718	N/A	N/A	N/A	MYO1D_HUMAN Unconventional myosin-Id
O94855-2	SEC24D	8.25568	8.66434	10.7066	1.0495	1.29688	not certain	SC24D_HUMAN Isoform 2 of Protein transport protein Sec24D
O94874	UFL1	13.7067	32.1945	>200	2.34882	14.5914	both	UFL1_HUMAN E3 UFM1-protein ligase 1
O94874-3	UFL1	>200	N/A	N/A	N/A	N/A	N/A	UFL1_HUMAN Isoform 3 of E3 UFM1-protein ligase 1
O94885	SASH1	5.83506	16.8731	N/A	2.89167	N/A	N/A	SASH1_HUMAN SAM and SH3 domain-containing protein 1
O94887	FARP2	N/A	19.8553	N/A	N/A	N/A	N/A	FARP2_HUMAN FERM, RhoGEF and pleckstrin domain-containing protein 2
O94888	UBXN7	12.0192	38.551	18.1357	3.20745	1.5089	proteasome	UBXN7_HUMAN UBX domain-containing protein 7
O94901-9	SUN1	N/A	4.16455	N/A	N/A	N/A	N/A	SUN1_HUMAN Isoform 9 of SUN domain-containing protein 1
O94903	PROSC	13.5327	N/A	15.847	N/A	1.17101	N/A	PROSC_HUMAN Proline synthase co-transcribed bacterial homolog protein
O94905	ERLIN2	N/A	6.96001	N/A	N/A	N/A	N/A	ERLN2_HUMAN Erlin-2
O94906	PRPF6	4.85567	8.64597	6.2071	1.78059	1.27832	not certain	PRP6_HUMAN Pre-mRNA-processing factor 6
O94913	PCF11	7.78817	14.5253	14.2652	1.86505	1.83165	not certain	PCF11_HUMAN Pre-mRNA cleavage complex 2 protein Pcf11
O94925	GLS	13.9186	21.6812	19.9985	1.55771	1.43681	not certain	GLSK_HUMAN Glutaminase kidney isoform, mitochondrial
O94952	FBXO21	4.8229	27.8484	7.75766	5.77421	1.60851	proteasome	FBX21_HUMAN F-box only protein 21
O94955	RHOBTB3	2.96483	5.05725	N/A	1.70575	N/A	N/A	RHBT3_HUMAN Rho-related BTB domain-containing protein 3
O94964-2	SOGA1	10.9209	N/A	N/A	N/A	N/A	N/A	SOGA1_HUMAN Isoform 2 of Protein SOGA1
O94966-5	USP19	8.83891	147.165	N/A	16.6497	N/A	N/A	UBP19_HUMAN Isoform 5 of Ubiquitin carboxyl-terminal hydrolase 19
O94972	TRIM37	1.34333	3.0035	1.3646	2.23585	1.01583	proteasome	TRI37_HUMAN E3 ubiquitin-protein ligase TRIM37
O94979-8	SEC31A	15.8	30.3347	45.512	1.91991	2.8805	lysosome	SC31A_HUMAN Isoform 8 of Protein transport protein Sec31A
O95067	CCNB2	2.9428	15.8434	5.01264	5.38377	1.70336	proteasome	CCNB2_HUMAN G2/mitotic-specific cyclin-B2
O95071	UBR5	6.13513	8.07676	11.1979	1.31648	1.8252	not certain	UBR5_HUMAN E3 ubiquitin-protein ligase UBR5
O95084	PRSS23	0.411083	0.415616	0.107046	1.01103	0.260401	not certain	PRS23_HUMAN Serine protease 23
O95104	SCAF4	11.1421	16.9143	N/A	1.51806	N/A	N/A	SFR15_HUMAN Splicing factor, arginine/serine-rich 15
O95139	NDUFB6	7.13849	17.6149	7.38176	2.4676	1.03408	proteasome	NDUB6_HUMAN NADH dehydrogenase [ubiquinone] 1 beta subcomplex subunit 6
O95140	MFN2	7.54323	39.1167	12.8766	5.18567	1.70704	proteasome	MFN2_HUMAN Mitofusin-2
O95163	IKBKAP	7.44199	N/A	13.8242	N/A	1.8576	N/A	ELP1_HUMAN Elongator complex protein 1
O95166	GABARAP	4.81586	12.2811	6.20821	2.55014	1.28912	proteasome	GBRAP_HUMAN Gamma-aminobutyric acid receptor-associated protein
O95169	NDUFB8	N/A	8.68823	N/A	N/A	N/A	N/A	NDUB8_HUMAN NADH dehydrogenase [ubiquinone] 1 beta subcomplex subunit 8, mitochondrial
O95182	NDUFA7	7.01779	20.5255	11.6515	2.92479	1.66028	proteasome	NDUA7_HUMAN NADH dehydrogenase [ubiquinone] 1 alpha subcomplex subunit 7
O95197	RTN3	20.0274	37.186	61.2321	1.85676	3.05742	lysosome	RTN3_HUMAN Reticulon-3
O95197-5	RTN3	N/A	N/A	27.2249	N/A	N/A	N/A	RTN3_HUMAN Isoform 5 of Reticulon-3
O95201	ZNF205	4.733	N/A	N/A	N/A	N/A	N/A	ZN205_HUMAN Zinc finger protein 205
O95202	LETM1	11.5853	22.534	49.2642	1.94506	4.25231	lysosome	LETM1_HUMAN LETM1 and EF-hand domain-containing protein 1, mitochondrial
O95208	EPN2	9.32527	33.8782	41.0146	3.63294	4.39822	both	EPN2_HUMAN Epsin-2
O95218	ZRANB2	11.9077	N/A	91.3237	N/A	7.6693	N/A	ZRAB2_HUMAN Zinc finger Ran-binding domain-containing protein 2
O95219	SNX4	N/A	29.2467	9.18806	N/A	N/A	N/A	SNX4_HUMAN Sorting nexin-4
O95229	ZWINT	2.24858	10.9433	N/A	4.86675	N/A	N/A	ZWINT_HUMAN ZW10 interactor
O95232	LUC7L3	10.3671	>200	20.5012	19.2917	1.97752	proteasome	LC7L3_HUMAN Luc7-like protein 3
O95235	KIF20A	N/A	8.06736	5.4751	N/A	N/A	N/A	KI20A_HUMAN Kinesin-like protein KIF20A
O95239	KIF4A	12.5072	13.2482	21.0747	1.05925	1.68501	not certain	KIF4A_HUMAN Chromosome-associated kinesin KIF4A
O95243	MBD4	7.63546	8.40688	5.69133	1.10103	0.745381	not certain	MBD4_HUMAN Methyl-CpG-binding domain protein 4
O95249	GOSR1	10.304	36.5199	13.8963	3.54426	1.34864	proteasome	GOSR1_HUMAN Golgi SNAP receptor complex member 1
O95251	KAT7	N/A	7.15913	N/A	N/A	N/A	N/A	KAT7_HUMAN Histone acetyltransferase KAT7
O95292	VAPB	17.7684	41.6805	88.865	2.34576	5.00128	both	VAPB_HUMAN Vesicle-associated membrane protein-associated protein B/C
O95298	NDUFC2	3.8745	N/A	3.89978	N/A	1.00653	N/A	NDUC2_HUMAN NADH dehydrogenase [ubiquinone] 1 subunit C2
O95299	NDUFA10	6.45629	7.51053	11.457	1.16329	1.77455	not certain	NDUAA_HUMAN NADH dehydrogenase [ubiquinone] 1 alpha subcomplex subunit 10, mitochondrial
O95302	FKBP9	N/A	N/A	20.0158	N/A	N/A	N/A	FKBP9_HUMAN Peptidyl-prolyl cis-trans isomerase FKBP9
O95319-3	CELF2	12.7043	11.1798	21.688	0.88	1.70713	not certain	CELF2_HUMAN Isoform 3 of CUGBP Elav-like family member 2
O95340-2	PAPSS2	12.3776	19.5033	133.812	1.57569	10.8108	lysosome	PAPS2_HUMAN Isoform B of Bifunctional 3'-phosphoadenosine 5'-phosphosulfate synthase 2
O95347	SMC2	5.0543	7.8022	8.72981	1.54367	1.7272	not certain	SMC2_HUMAN Structural maintenance of chromosomes protein 2
O95363	FARS2	N/A	N/A	22.7336	N/A	N/A	N/A	SYFM_HUMAN Phenylalanine--tRNA ligase, mitochondrial
O95365	ZBTB7A	N/A	>200	16.0562	N/A	N/A	N/A	ZBT7A_HUMAN Zinc finger and BTB domain-containing protein 7A
O95372	LYPLA2	11.4098	>200	N/A	17.5287	N/A	N/A	LYPA2_HUMAN Acyl-protein thioesterase 2
O95373	IPO7	14.6822	29.4831	>200	2.00808	13.6219	both	IPO7_HUMAN Importin-7
O95376	ARIH2	N/A	N/A	20.6601	N/A	N/A	N/A	ARI2_HUMAN E3 ubiquitin-protein ligase ARIH2
O95391	SLU7	5.60617	27.1503	9.45115	4.84293	1.68585	proteasome	SLU7_HUMAN Pre-mRNA-splicing factor SLU7
O95394-4	PGM3	N/A	16.771	21.8383	N/A	N/A	N/A	AGM1_HUMAN Isoform 3 of Phosphoacetylglucosamine mutase
O95402	MED26	4.72783	24.5536	5.22342	5.19341	1.10482	proteasome	MED26_HUMAN Mediator of RNA polymerase II transcription subunit 26
O95425	SVIL	15.0423	37.3262	56.1708	2.48142	3.7342	both	SVIL_HUMAN Supervillin
O95433	AHSA1	12.5958	24.9154	9.32276	1.97807	0.740148	not certain	AHSA1_HUMAN Activator of 90 kDa heat shock protein ATPase homolog 1
O95453	PARN	8.67844	N/A	10.307	N/A	1.18766	N/A	PARN_HUMAN Poly(A)-specific ribonuclease PARN
O95456	PSMG1	6.72632	16.5864	N/A	2.4659	N/A	N/A	PSMG1_HUMAN Proteasome assembly chaperone 1
O95470	SGPL1	17.06	32.016	24.5275	1.87667	1.43772	not certain	SGPL1_HUMAN Sphingosine-1-phosphate lyase 1
O95471	CLDN7	8.86151	28.7971	9.80406	3.24969	1.10636	proteasome	CLD7_HUMAN Claudin-7
O95563	MPC2	6.82567	N/A	N/A	N/A	N/A	N/A	MPC2_HUMAN Mitochondrial pyruvate carrier 2
O95573	ACSL3	7.03774	22.6519	15.5379	3.21863	2.2078	both	ACSL3_HUMAN Long-chain-fatty-acid--CoA ligase 3
O95619	YEATS4	N/A	64.9622	N/A	N/A	N/A	N/A	YETS4_HUMAN YEATS domain-containing protein 4
O95628-6	CNOT4	N/A	N/A	10.6819	N/A	N/A	N/A	CNOT4_HUMAN Isoform 6 of CCR4-NOT transcription complex subunit 4
O95630	STAMBP	9.83187	N/A	N/A	N/A	N/A	N/A	STABP_HUMAN STAM-binding protein
O95671	ASMTL	7.91083	N/A	7.0029	N/A	0.885229	N/A	ASML_HUMAN N-acetylserotonin O-methyltransferase-like protein
O95685	PPP1R3D	N/A	>200	N/A	N/A	N/A	N/A	PPR3D_HUMAN Protein phosphatase 1 regulatory subunit 3D
O95714	HERC2	N/A	41.5556	N/A	N/A	N/A	N/A	HERC2_HUMAN E3 ubiquitin-protein ligase HERC2
O95716	RAB3D	15.7498	24.8975	>200	1.58082	12.6986	lysosome	RAB3D_HUMAN Ras-related protein Rab-3D
O95747	OXSR1	17.3417	29.1361	69.4536	1.68012	4.00501	lysosome	OXSR1_HUMAN Serine/threonine-protein kinase OSR1
O95749	GGPS1	11.2433	N/A	N/A	N/A	N/A	N/A	GGPPS_HUMAN Geranylgeranyl pyrophosphate synthase
O95758-4	PTBP3	11.0444	22.8385	28.4193	2.06787	2.57319	both	PTBP3_HUMAN Isoform 4 of Polypyrimidine tract-binding protein 3
O95782	AP2A1	13.0266	66.0769	30.4948	5.07245	2.34096	both	AP2A1_HUMAN AP-2 complex subunit alpha-1
O95785	WIZ	18.583	40.02	20.1848	2.15358	1.0862	proteasome	WIZ_HUMAN Protein Wiz
O95793	STAU1	12.0694	>200	7.58616	16.5708	0.628543	proteasome	STAU1_HUMAN Double-stranded RNA-binding protein Staufen homolog 1
O95801	TTC4	11.9302	19.5694	10.1322	1.64032	0.849291	not certain	TTC4_HUMAN Tetratricopeptide repeat protein 4
O95817	BAG3	6.34634	92.0514	9.99924	14.5046	1.57559	proteasome	BAG3_HUMAN BAG family molecular chaperone regulator 3
O95831	AIFM1	11.595	13.827	41.0146	1.1925	3.53728	lysosome	AIFM1_HUMAN Apoptosis-inducing factor 1, mitochondrial
O95858	TSPAN15	5.82526	11.0603	6.79223	1.89868	1.166	not certain	TSN15_HUMAN Tetraspanin-15
O95870	ABHD16A	N/A	25.2881	N/A	N/A	N/A	N/A	ABHGA_HUMAN Abhydrolase domain-containing protein 16A
O95873	C6orf47	11.8547	N/A	N/A	N/A	N/A	N/A	CF047_HUMAN Uncharacterized protein C6orf47
O95881	TXNDC12	6.4383	18.7998	N/A	2.91999	N/A	N/A	TXD12_HUMAN Thioredoxin domain-containing protein 12
O95900	TRUB2	2.22569	5.37115	N/A	2.41325	N/A	N/A	TRUB2_HUMAN Probable tRNA pseudouridine synthase 2
O95926	SYF2	N/A	9.71202	3.76485	N/A	N/A	N/A	SYF2_HUMAN Pre-mRNA-splicing factor SYF2
O95983	MBD3	N/A	21.7219	21.2101	N/A	N/A	N/A	MBD3_HUMAN Methyl-CpG-binding domain protein 3
O95994	AGR2	10.4421	27.9045	11.2451	2.6723	1.0769	proteasome	AGR2_HUMAN Anterior gradient protein 2 homolog
O96000	NDUFB10	3.49721	5.97901	3.89387	1.70965	1.11342	not certain	NDUBA_HUMAN NADH dehydrogenase [ubiquinone] 1 beta subcomplex subunit 10
O96005	CLPTM1	14.3183	27.2036	27.0972	1.89992	1.89249	not certain	CLPT1_HUMAN Cleft lip and palate transmembrane protein 1
O96008	TOMM40	10.5614	20.8528	N/A	1.97443	N/A	N/A	TOM40_HUMAN Mitochondrial import receptor subunit TOM40 homolog
O96011	PEX11B	12.8313	N/A	N/A	N/A	N/A	N/A	PX11B_HUMAN Peroxisomal membrane protein 11B
O96013	PAK4	9.60038	25.5397	N/A	2.66028	N/A	N/A	PAK4_HUMAN Serine/threonine-protein kinase PAK 4
O96019	ACTL6A	N/A	21.7697	N/A	N/A	N/A	N/A	ACL6A_HUMAN Actin-like protein 6A
P00156	MT-CYB	13.2685	14.3064	N/A	1.07822	N/A	N/A	CYB_HUMAN Cytochrome b
P00167	CYB5A	12.2768	15.9601	21.0619	1.30002	1.71559	not certain	CYB5_HUMAN Cytochrome b5
P00338-3	LDHA	14.7667	27.3215	10.7832	1.85022	0.730243	not certain	LDHA_HUMAN Isoform 3 of L-lactate dehydrogenase A chain
P00367	GLUD1	5.86965	8.38552	7.19929	1.42862	1.22653	not certain	DHE3_HUMAN Glutamate dehydrogenase 1, mitochondrial
P00374	DHFR	N/A	49.688	9.45631	N/A	N/A	N/A	DYR_HUMAN Dihydrofolate reductase
P00387-3	CYB5R3	11.7922	49.3695	41.0876	4.18661	3.48429	both	NB5R3_HUMAN Isoform 3 of NADH-cytochrome b5 reductase 3
P00390	GSR	4.10049	13.9719	7.61031	3.40738	1.85595	proteasome	GSHR_HUMAN Glutathione reductase, mitochondrial
P00491	PNP	6.4599	9.82212	N/A	1.52048	N/A	N/A	PNPH_HUMAN Purine nucleoside phosphorylase
P00492	HPRT1	37.712	184.348	13.098	4.8883	0.347317	proteasome	HPRT_HUMAN Hypoxanthine-guanine phosphoribosyltransferase
P00505	GOT2	22.7038	>200	>200	8.8091	8.8091	both	AATM_HUMAN Aspartate aminotransferase, mitochondrial
P00558	PGK1	17.5658	63.1857	56.3993	3.59708	3.21074	both	PGK1_HUMAN Phosphoglycerate kinase 1
P00568	AK1	12.5185	166.222	7.99109	13.2782	0.638344	proteasome	KAD1_HUMAN Adenylate kinase isoenzyme 1
P00846	MT-ATP6	N/A	15.2676	18.3712	N/A	N/A	N/A	ATP6_HUMAN ATP synthase subunit a
P00918	CA2	N/A	N/A	21.5531	N/A	N/A	N/A	CAH2_HUMAN Carbonic anhydrase 2
P00966	ASS1	10.9901	21.3407	12.9391	1.94181	1.17734	not certain	ASSY_HUMAN Argininosuccinate synthase
P00973-3	OAS1	14.3717	73.4266	N/A	5.10911	N/A	N/A	OAS1_HUMAN Isoform p48 of 2'-5'-oligoadenylate synthase 1
P01111	NRAS	65.2681	22.5781	>200	0.345928	3.06428	lysosome	RASN_HUMAN GTPase NRas
P01116	KRAS	16.6182	22.9747	54.7942	1.3825	3.29723	lysosome	RASK_HUMAN GTPase KRas
P02545	LMNA	9.74069	17.3939	37.3262	1.7857	3.83199	lysosome	LMNA_HUMAN Prelamin-A/C
P02647	APOA1	N/A	47.5736	14.7698	N/A	N/A	N/A	APOA1_HUMAN Apolipoprotein A-I
P02786	TFRC	7.46363	N/A	21.1454	N/A	2.83313	N/A	TFR1_HUMAN Transferrin receptor protein 1
P02794	FTH1	3.26586	N/A	3.07192	N/A	0.940613	N/A	FRIH_HUMAN Ferritin heavy chain
P03372	ESR1	2.43124	5.22381	N/A	2.14862	N/A	N/A	ESR1_HUMAN Estrogen receptor
P04040	CAT	N/A	9.57121	14.1719	N/A	N/A	N/A	CATA_HUMAN Catalase
P04049-2	RAF1	9.57782	N/A	N/A	N/A	N/A	N/A	RAF1_HUMAN Isoform 2 of RAF proto-oncogene serine/threonine-protein kinase
P04062	GBA	4.87103	5.21712	4.77967	1.07105	0.981244	not certain	GLCM_HUMAN Glucosylceramidase
P04075-2	ALDOA	108.814	>200	>200	1.83799	1.83799	not certain	ALDOA_HUMAN Isoform 2 of Fructose-bisphosphate aldolase A
P04080	CSTB	18.8304	N/A	12.8289	N/A	0.681288	N/A	CYTB_HUMAN Cystatin-B
P04083	ANXA1	11.9385	N/A	N/A	N/A	N/A	N/A	ANXA1_HUMAN Annexin A1
P04150-3	NR3C1	9.72565	>200	N/A	20.5642	N/A	N/A	GCR_HUMAN Isoform Alpha-2 of Glucocorticoid receptor
P04156	PRNP	6.32088	7.10046	2.98359	1.12334	0.472021	not certain	PRIO_HUMAN Major prion protein
P04181	OAT	10.0442	23.5524	13.1452	2.34489	1.30874	proteasome	OAT_HUMAN Ornithine aminotransferase, mitochondrial
P04183	TK1	8.36932	22.5487	8.3967	2.69421	1.00327	proteasome	KITH_HUMAN Thymidine kinase, cytosolic
P04406	GAPDH	13.8353	>200	12.9367	14.4558	0.93505	proteasome	G3P_HUMAN Glyceraldehyde-3-phosphate dehydrogenase
P04632	CAPNS1	1.91583	10.1873	2.22662	5.31746	1.16222	proteasome	CPNS1_HUMAN Calpain small subunit 1
P04792	HSPB1	7.49186	169.474	9.50298	22.621	1.26844	proteasome	HSPB1_HUMAN Heat shock protein beta-1
P04798	CYP1A1	1.71431	4.19225	2.86023	2.44545	1.66844	proteasome	CP1A1_HUMAN Cytochrome P450 1A1
P04843	RPN1	9.51211	11.7602	13.8879	1.23634	1.46003	not certain	RPN1_HUMAN Dolichyl-diphosphooligosaccharide--protein glycosyltransferase subunit 1
P04844	RPN2	5.78394	24.7199	6.44189	4.27389	1.11375	proteasome	RPN2_HUMAN Dolichyl-diphosphooligosaccharide--protein glycosyltransferase subunit 2
P04899-4	GNAI2	9.24936	13.0733	26.1171	1.41343	2.82366	lysosome	GNAI2_HUMAN Isoform sGi2 of Guanine nucleotide-binding protein G(i) subunit alpha-2
P04908	HIST1H2AB	N/A	19.0792	11.2287	N/A	N/A	N/A	H2A1B_HUMAN Histone H2A type 1-B/E
P05023	ATP1A1	N/A	11.423	9.99347	N/A	N/A	N/A	AT1A1_HUMAN Sodium/potassium-transporting ATPase subunit alpha-1
P05026	ATP1B1	6.0521	10.4911	10.9623	1.73346	1.81132	not certain	AT1B1_HUMAN Sodium/potassium-transporting ATPase subunit beta-1
P05067	APP	N/A	6.28705	N/A	N/A	N/A	N/A	A4_HUMAN Amyloid beta A4 protein
P05114	HMGN1	33.453	>200	>200	5.97853	5.97853	both	HMGN1_HUMAN Non-histone chromosomal protein HMG-14
P05141	SLC25A5	12.9078	32.742	29.736	2.53661	2.30373	both	ADT2_HUMAN ADP/ATP translocase 2
P05161	ISG15	11.151	18.7845	8.08712	1.68455	0.725236	not certain	ISG15_HUMAN Ubiquitin-like protein ISG15
P05166-2	PCCB	N/A	5.82183	3.64527	N/A	N/A	N/A	PCCB_HUMAN Isoform 2 of Propionyl-CoA carboxylase beta chain, mitochondrial
P05198	EIF2S1	14.6419	29.5459	13.8519	2.0179	0.946043	proteasome	IF2A_HUMAN Eukaryotic translation initiation factor 2 subunit 1
P05204	HMGN2	35.1495	N/A	>200	N/A	5.68999	N/A	HMGN2_HUMAN Non-histone chromosomal protein HMG-17
P05362	ICAM1	N/A	N/A	29.7106	N/A	N/A	N/A	ICAM1_HUMAN Intercellular adhesion molecule 1
P05386	RPLP1	6.8351	N/A	N/A	N/A	N/A	N/A	RLA1_HUMAN 60S acidic ribosomal protein P1
P05387	RPLP2	9.73658	17.4201	10.5438	1.78914	1.0829	not certain	RLA2_HUMAN 60S acidic ribosomal protein P2
P05388	RPLP0	14.5956	12.1434	16.6702	0.83199	1.14214	not certain	RLA0_HUMAN 60S acidic ribosomal protein P0
P05412	JUN	N/A	10.6967	2.94643	N/A	N/A	N/A	JUN_HUMAN Transcription factor AP-1
P05423	POLR3D	N/A	34.3312	N/A	N/A	N/A	N/A	RPC4_HUMAN DNA-directed RNA polymerase III subunit RPC4
P05455	SSB	11.9016	7.50565	73.194	0.630644	6.14995	lysosome	LA_HUMAN Lupus La protein
P05556	ITGB1	4.24436	N/A	6.90798	N/A	1.62757	N/A	ITB1_HUMAN Integrin beta-1
P05556-3	ITGB1	13.2457	26.8558	13.8991	2.02751	1.04933	proteasome	ITB1_HUMAN Isoform 3 of Integrin beta-1
P06280	GLA	4.45553	6.36323	3.66009	1.42816	0.82147	not certain	AGAL_HUMAN Alpha-galactosidase A
P06396	GSN	15.8217	44.461	27.7815	2.81013	1.75591	proteasome	GELS_HUMAN Gelsolin
P06400	RB1	8.90248	14.2887	24.7818	1.60503	2.7837	lysosome	RB_HUMAN Retinoblastoma-associated protein
P06401	PGR	9.02066	N/A	14.8394	N/A	1.64504	N/A	PRGR_HUMAN Progesterone receptor
P06493	CDK1	10.2506	23.9677	8.13458	2.33817	0.793569	proteasome	CDK1_HUMAN Cyclin-dependent kinase 1
P06576	ATP5B	4.96773	6.51822	6.19268	1.31211	1.24658	not certain	ATPB_HUMAN ATP synthase subunit beta, mitochondrial
P06703	S100A6	11.0216	N/A	N/A	N/A	N/A	N/A	S10A6_HUMAN Protein S100-A6
P06730-2	EIF4E	17.86	46.6452	26.1466	2.61171	1.46398	proteasome	IF4E_HUMAN Isoform 2 of Eukaryotic translation initiation factor 4E
P06733	ENO1	11.9611	20.6478	15.7677	1.72624	1.31824	not certain	ENOA_HUMAN Alpha-enolase
P06737	PYGL	N/A	14.8872	13.9579	N/A	N/A	N/A	PYGL_HUMAN Glycogen phosphorylase, liver form
P06744-2	GPI	2.58676	7.11869	4.58007	2.75198	1.77058	proteasome	G6PI_HUMAN Isoform 2 of Glucose-6-phosphate isomerase
P06748	NPM1	12.6004	25.3807	78.6773	2.01428	6.24404	both	NPM_HUMAN Nucleophosmin
P06753	TPM3	7.36842	15.3148	13.704	2.07844	1.85983	proteasome	TPM3_HUMAN Tropomyosin alpha-3 chain
P06865	HEXA	N/A	11.1313	N/A	N/A	N/A	N/A	HEXA_HUMAN Beta-hexosaminidase subunit alpha
P07099	EPHX1	10.9537	33.007	N/A	3.01333	N/A	N/A	HYEP_HUMAN Epoxide hydrolase 1
P07108-5	DBI	29.877	>200	10.8186	6.6941	0.362104	proteasome	ACBP_HUMAN Isoform 5 of Acyl-CoA-binding protein
P07195	LDHB	80.9751	N/A	N/A	N/A	N/A	N/A	LDHB_HUMAN L-lactate dehydrogenase B chain
P07237	P4HB	7.54487	>200	20.6478	26.5081	2.73667	both	PDIA1_HUMAN Protein disulfide-isomerase
P07305	H1F0	14.8904	>200	20.5134	13.4315	1.37763	proteasome	H10_HUMAN Histone H1.0
P07355-2	ANXA2	14.729	N/A	N/A	N/A	N/A	N/A	ANXA2_HUMAN Isoform 2 of Annexin A2
P07384	CAPN1	10.2658	19.9582	9.91343	1.94414	0.965675	not certain	CAN1_HUMAN Calpain-1 catalytic subunit
P07602-3	PSAP	10.4547	N/A	>200	N/A	19.1301	N/A	SAP_HUMAN Isoform Sap-mu-9 of Prosaposin
P07686	HEXB	18.8151	N/A	38.1479	N/A	2.02752	N/A	HEXB_HUMAN Beta-hexosaminidase subunit beta
P07737	PFN1	9.38334	21.3473	9.88798	2.27502	1.05378	proteasome	PROF1_HUMAN Profilin-1
P07814	EPRS	7.7317	23.4488	30.9027	3.03281	3.99688	both	SYEP_HUMAN Bifunctional glutamate/proline--tRNA ligase
P07858	CTSB	26.3855	23.6166	58.3457	0.89506	2.21128	lysosome	CATB_HUMAN Cathepsin B
P07900-2	HSP90AA1	10.7565	16.8485	79.3075	1.56636	7.373	lysosome	HS90A_HUMAN Isoform 2 of Heat shock protein HSP 90-alpha
P07910	HNRNPC	7.45881	N/A	9.97908	N/A	1.33789	N/A	HNRPC_HUMAN Heterogeneous nuclear ribonucleoproteins C1/C2
P07948	LYN	N/A	21.6001	43.3488	N/A	N/A	N/A	LYN_HUMAN Tyrosine-protein kinase Lyn
P07949	RET	N/A	3.28911	2.14676	N/A	N/A	N/A	RET_HUMAN Proto-oncogene tyrosine-protein kinase receptor Ret
P07954	FH	5.2187	11.8103	5.15389	2.26308	0.987583	proteasome	FUMH_HUMAN Fumarate hydratase, mitochondrial
P08047	SP1	11.4912	16.3324	N/A	1.4213	N/A	N/A	SP1_HUMAN Transcription factor Sp1
P08107	HSPA1A	9.28529	16.7144	>200	1.8001	21.5394	lysosome	HSP71_HUMAN Heat shock 70 kDa protein 1A/1B
P08134	RHOC	14.3124	31.5785	11.0921	2.20638	0.775004	proteasome	RHOC_HUMAN Rho-related GTP-binding protein RhoC
P08183	ABCB1	N/A	94.4342	N/A	N/A	N/A	N/A	MDR1_HUMAN Multidrug resistance protein 1
P08195-4	SLC3A2	8.89563	13.7748	28.9052	1.54849	3.24937	lysosome	4F2_HUMAN Isoform 4 of 4F2 cell-surface antigen heavy chain
P08236	GUSB	2.59285	N/A	N/A	N/A	N/A	N/A	BGLR_HUMAN Beta-glucuronidase
P08237-3	PFKM	6.57697	19.3671	11.151	2.94468	1.69546	proteasome	K6PF_HUMAN Isoform 3 of 6-phosphofructokinase, muscle type
P08238	HSP90AB1	7.83306	58.6915	29.9028	7.4928	3.81752	both	HS90B_HUMAN Heat shock protein HSP 90-beta
P08240	SRPR	12.5889	54.8376	40.1824	4.35601	3.19188	both	SRPR_HUMAN Signal recognition particle receptor subunit alpha
P08243	ASNS	9.6217	19.2755	10.8423	2.00334	1.12686	proteasome	ASNS_HUMAN Asparagine synthetase [glutamine-hydrolyzing]
P08397	HMBS	4.5704	8.92656	6.0995	1.95312	1.33457	not certain	HEM3_HUMAN Porphobilinogen deaminase
P08473	MME	N/A	28.2686	N/A	N/A	N/A	N/A	NEP_HUMAN Neprilysin
P08559-4	PDHA1	5.38325	8.87058	5.27269	1.64781	0.979461	not certain	ODPA_HUMAN Isoform 4 of Pyruvate dehydrogenase E1 component subunit alpha, somatic form, mitochondrial
P08574	CYC1	9.45631	17.3634	N/A	1.83617	N/A	N/A	CY1_HUMAN Cytochrome c1, heme protein, mitochondrial
P08579	SNRPB2	4.51033	6.06853	5.6326	1.34547	1.24882	not certain	RU2B_HUMAN U2 small nuclear ribonucleoprotein B''
P08621	SNRNP70	11.0198	24.0843	21.4996	2.18555	1.95099	proteasome	RU17_HUMAN U1 small nuclear ribonucleoprotein 70 kDa
P08631	HCK	N/A	43.5121	N/A	N/A	N/A	N/A	HCK_HUMAN Tyrosine-protein kinase HCK
P08651	NFIC	8.66217	27.8484	N/A	3.21495	N/A	N/A	NFIC_HUMAN Nuclear factor 1 C-type
P08670	VIM	5.7556	N/A	N/A	N/A	N/A	N/A	VIME_HUMAN Vimentin
P08754	GNAI3	8.16716	13.4435	13.3632	1.64604	1.63621	not certain	GNAI3_HUMAN Guanine nucleotide-binding protein G(k) subunit alpha
P08758	ANXA5	15.7856	39.6311	13.0635	2.51058	0.827554	proteasome	ANXA5_HUMAN Annexin A5
P08865	RPSA	9.03712	13.5885	12.6533	1.50363	1.40015	not certain	RSSA_HUMAN 40S ribosomal protein SA
P08922	ROS1	N/A	11.9839	10.5198	N/A	N/A	N/A	ROS1_HUMAN Proto-oncogene tyrosine-protein kinase ROS
P08962	CD63	8.54893	16.4136	17.4772	1.91996	2.04438	lysosome	CD63_HUMAN CD63 antigen
P09001	MRPL3	5.64222	4.91176	3.78355	0.870536	0.670579	not certain	RM03_HUMAN 39S ribosomal protein L3, mitochondrial
P09012	SNRPA	10.4453	13.3374	8.08335	1.27689	0.773878	not certain	SNRPA_HUMAN U1 small nuclear ribonucleoprotein A
P09110	ACAA1	13.9691	20.3627	>200	1.4577	14.3173	lysosome	THIK_HUMAN 3-ketoacyl-CoA thiolase, peroxisomal
P09132	SRP19	14.4195	74.7732	13.6581	5.18554	0.947192	proteasome	SRP19_HUMAN Signal recognition particle 19 kDa protein
P09234	SNRPC	13.6393	33.1332	23.8359	2.42925	1.74759	proteasome	RU1C_HUMAN U1 small nuclear ribonucleoprotein C
P09382	LGALS1	13.0462	>200	15.1111	15.3301	1.15827	proteasome	LEG1_HUMAN Galectin-1
P09429	HMGB1	27.3323	48.9857	9.60437	1.79223	0.351393	not certain	HMGB1_HUMAN High mobility group protein B1
P09467	FBP1	11.8751	>200	18.3859	16.842	1.54828	proteasome	F16P1_HUMAN Fructose-1,6-bisphosphatase 1
P09493-8	TPM1	13.294	34.5193	19.1108	2.59661	1.43755	proteasome	TPM1_HUMAN Isoform 8 of Tropomyosin alpha-1 chain
P09493-9	TPM1	8.6352	15.2441	19.2862	1.76534	2.23344	lysosome	TPM1_HUMAN Isoform 9 of Tropomyosin alpha-1 chain
P09496	CLTA	11.0726	N/A	N/A	N/A	N/A	N/A	CLCA_HUMAN Clathrin light chain A
P09525	ANXA4	10.6116	65.2067	15.9564	6.14487	1.50368	proteasome	ANXA4_HUMAN Annexin A4
P09543	CNP	9.90069	>200	32.8039	20.2006	3.3133	both	CN37_HUMAN 2',3'-cyclic-nucleotide 3'-phosphodiesterase
P09601	HMOX1	N/A	N/A	11.2269	N/A	N/A	N/A	HMOX1_HUMAN Heme oxygenase 1
P09622	DLD	7.03417	26.5167	10.3811	3.7697	1.47581	proteasome	DLDH_HUMAN Dihydrolipoyl dehydrogenase, mitochondrial
P09651	HNRNPA1	10.3873	>200	24.5797	19.2542	2.36631	both	ROA1_HUMAN Heterogeneous nuclear ribonucleoprotein A1
P09661	SNRPA1	6.98455	10.4879	9.51994	1.50159	1.363	not certain	RU2A_HUMAN U2 small nuclear ribonucleoprotein A'
P09669	COX6C	1.38541	1.48292	1.12294	1.07039	0.81055	not certain	COX6C_HUMAN Cytochrome c oxidase subunit 6C
P09758	TACSTD2	N/A	13.3452	N/A	N/A	N/A	N/A	TACD2_HUMAN Tumor-associated calcium signal transducer 2
P09874	PARP1	21.6473	33.0385	48.9857	1.52622	2.2629	lysosome	PARP1_HUMAN Poly [ADP-ribose] polymerase 1
P09914	IFIT1	7.95258	27.9045	6.71004	3.50886	0.843756	proteasome	IFIT1_HUMAN Interferon-induced protein with tetratricopeptide repeats 1
P09960	LTA4H	22.1241	>200	12.3688	9.03993	0.559065	proteasome	LKHA4_HUMAN Leukotriene A-4 hydrolase
P09972	ALDOC	N/A	>200	N/A	N/A	N/A	N/A	ALDOC_HUMAN Fructose-bisphosphate aldolase C
P0C221	CCDC175	N/A	N/A	>200	N/A	N/A	N/A	CC175_HUMAN Coiled-coil domain-containing protein 175
P0C7P4	UQCRFS1P1	N/A	18.1168	18.3033	N/A	N/A	N/A	UCRIL_HUMAN Putative cytochrome b-c1 complex subunit Rieske-like protein 1
P0C7X2	ZNF688	10.4673	>200	17.464	19.1071	1.66843	proteasome	ZN688_HUMAN Zinc finger protein 688
P0CG08	GPR89B	10.5953	18.4054	16.1422	1.73712	1.52352	not certain	GPHRB_HUMAN Golgi pH regulator B
P0CG48	UBC	5.9909	29.0141	24.5449	4.84303	4.09703	both	UBC_HUMAN Polyubiquitin-C
P0CW22	RPS17L	5.97077	7.40463	3.92473	1.24015	0.657324	not certain	RS17L_HUMAN 40S ribosomal protein S17-like
P0DJ07	PET100	N/A	N/A	5.32412	N/A	N/A	N/A	PT100_HUMAN Protein PET100 homolog, mitochondrial
P10155	TROVE2	6.01586	8.0309	5.02791	1.33496	0.835775	not certain	RO60_HUMAN 60 kDa SS-A/Ro ribonucleoprotein
P10244	MYBL2	6.25471	N/A	N/A	N/A	N/A	N/A	MYBB_HUMAN Myb-related protein B
P10276	RARA	N/A	N/A	6.29962	N/A	N/A	N/A	RARA_HUMAN Retinoic acid receptor alpha
P10301	RRAS	N/A	14.0228	>200	N/A	N/A	N/A	RRAS_HUMAN Ras-related protein R-Ras
P10316	HLA-A	7.54323	21.9837	8.17873	2.91437	1.08425	proteasome	1A69_HUMAN HLA class I histocompatibility antigen, A-69 alpha chain
P10412	HIST1H1E	N/A	>200	N/A	N/A	N/A	N/A	H14_HUMAN Histone H1.4
P10599	TXN	11.3408	>200	13.8685	17.6355	1.22289	proteasome	THIO_HUMAN Thioredoxin
P10606	COX5B	4.20778	N/A	4.19023	N/A	0.995829	N/A	COX5B_HUMAN Cytochrome c oxidase subunit 5B, mitochondrial
P10619	CTSA	5.27831	7.90091	7.59197	1.49687	1.43834	not certain	PPGB_HUMAN Lysosomal protective protein
P10620	MGST1	15.2106	73.3489	11.1924	4.82222	0.735831	proteasome	MGST1_HUMAN Microsomal glutathione S-transferase 1
P10632	CYP2C8	N/A	N/A	11.0638	N/A	N/A	N/A	CP2C8_HUMAN Cytochrome P450 2C8
P10644	PRKAR1A	5.71291	14.2917	5.9355	2.50165	1.03896	proteasome	KAP0_HUMAN cAMP-dependent protein kinase type I-alpha regulatory subunit
P10768	ESD	14.5926	26.9917	11.8751	1.84969	0.813774	not certain	ESTD_HUMAN S-formylglutathione hydrolase
P10809	HSPD1	12.6027	46.8659	37.3463	3.71873	2.96336	both	CH60_HUMAN 60 kDa heat shock protein, mitochondrial
P10909-2	CLU	4.0445	6.88397	4.68248	1.70206	1.15774	not certain	CLUS_HUMAN Isoform 2 of Clusterin
P11021	HSPA5	25.6816	38.4868	26.4762	1.49861	1.03094	not certain	GRP78_HUMAN 78 kDa glucose-regulated protein
P11142	HSPA8	9.51864	15.5693	18.613	1.63567	1.95542	not certain	HSP7C_HUMAN Heat shock cognate 71 kDa protein
P11166	SLC2A1	N/A	18.9644	40.5824	N/A	N/A	N/A	GTR1_HUMAN Solute carrier family 2, facilitated glucose transporter member 1
P11172	UMPS	11.5737	14.3153	23.4171	1.23689	2.02331	lysosome	UMPS_HUMAN Uridine 5'-monophosphate synthase
P11177	PDHB	7.89461	11.9118	6.04682	1.50885	0.765943	not certain	ODPB_HUMAN Pyruvate dehydrogenase E1 component subunit beta, mitochondrial
P11182	DBT	7.00644	N/A	N/A	N/A	N/A	N/A	ODB2_HUMAN Lipoamide acyltransferase component of branched-chain alpha-keto acid dehydrogenase complex, mitochondrial
P11216	PYGB	N/A	20.9854	N/A	N/A	N/A	N/A	PYGB_HUMAN Glycogen phosphorylase, brain form
P11233	RALA	11.4324	55.0117	62.842	4.8119	5.49683	both	RALA_HUMAN Ras-related protein Ral-A
P11234	RALB	13.3016	13.9074	>200	1.04555	15.0358	lysosome	RALB_HUMAN Ras-related protein Ral-B
P11310-2	ACADM	N/A	11.4343	6.87441	N/A	N/A	N/A	ACADM_HUMAN Isoform 2 of Medium-chain specific acyl-CoA dehydrogenase, mitochondrial
P11387	TOP1	11.1403	69.1074	55.8539	6.20339	5.0137	both	TOP1_HUMAN DNA topoisomerase 1
P11388-4	TOP2A	6.22606	12.5117	N/A	2.00957	N/A	N/A	TOP2A_HUMAN Isoform 4 of DNA topoisomerase 2-alpha
P11413-2	G6PD	8.80634	20.2261	12.8408	2.29676	1.45813	proteasome	G6PD_HUMAN Isoform Long of Glucose-6-phosphate 1-dehydrogenase
P11474	ESRRA	5.98056	N/A	N/A	N/A	N/A	N/A	ERR1_HUMAN Steroid hormone receptor ERR1
P11498	PC	N/A	13.6366	N/A	N/A	N/A	N/A	PYC_HUMAN Pyruvate carboxylase, mitochondrial
P11586	MTHFD1	11.1349	19.6415	10.6984	1.76396	0.960796	not certain	C1TC_HUMAN C-1-tetrahydrofolate synthase, cytoplasmic
P11908	PRPS2	N/A	24.8173	N/A	N/A	N/A	N/A	PRPS2_HUMAN Ribose-phosphate pyrophosphokinase 2
P11908-2	PRPS2	6.8963	N/A	13.0659	N/A	1.89463	N/A	PRPS2_HUMAN Isoform 2 of Ribose-phosphate pyrophosphokinase 2
P11940	PABPC1	6.97893	11.2744	24.1263	1.61548	3.45701	lysosome	PABP1_HUMAN Polyadenylate-binding protein 1
P12004	PCNA	19.2434	15.3896	144.707	0.799734	7.51983	lysosome	PCNA_HUMAN Proliferating cell nuclear antigen
P12081	HARS	11.216	147.478	21.7492	13.1489	1.93913	proteasome	SYHC_HUMAN Histidine--tRNA ligase, cytoplasmic
P12235	SLC25A4	4.81653	6.41625	N/A	1.33213	N/A	N/A	ADT1_HUMAN ADP/ATP translocase 1
P12236	SLC25A6	17.5258	24.076	9.19171	1.37374	0.524466	not certain	ADT3_HUMAN ADP/ATP translocase 3
P12268	IMPDH2	8.87853	49.5813	31.8542	5.58441	3.58778	both	IMDH2_HUMAN Inosine-5'-monophosphate dehydrogenase 2
P12270	TPR	2.94881	17.6643	5.5908	5.99032	1.89595	proteasome	TPR_HUMAN Nucleoprotein TPR
P12429	ANXA3	N/A	87.2981	21.3145	N/A	N/A	N/A	ANXA3_HUMAN Annexin A3
P12532-2	CKMT1A	N/A	110.55	12.8694	N/A	N/A	N/A	KCRU_HUMAN Isoform 2 of Creatine kinase U-type, mitochondrial
P12814-4	ACTN1	13.3093	52.0772	37.4674	3.91285	2.81514	both	ACTN1_HUMAN Isoform 4 of Alpha-actinin-1
P12956	XRCC6	12.7323	13.1827	15.6255	1.03537	1.22723	not certain	XRCC6_HUMAN X-ray repair cross-complementing protein 6
P13010	XRCC5	6.60266	9.95758	9.74891	1.50812	1.47651	not certain	XRCC5_HUMAN X-ray repair cross-complementing protein 5
P13051	UNG	6.97472	10.8304	5.16311	1.55281	0.740261	not certain	UNG_HUMAN Uracil-DNA glycosylase
P13073	COX4I1	5.07428	8.44478	7.11942	1.66423	1.40304	not certain	COX41_HUMAN Cytochrome c oxidase subunit 4 isoform 1, mitochondrial
P13196	ALAS1	N/A	N/A	3.76056	N/A	N/A	N/A	HEM1_HUMAN 5-aminolevulinate synthase, nonspecific, mitochondrial
P13284	IFI30	N/A	24.0593	8.9949	N/A	N/A	N/A	GILT_HUMAN Gamma-interferon-inducible lysosomal thiol reductase
P13498	CYBA	2.43517	6.75648	3.73906	2.77454	1.53544	proteasome	CY24A_HUMAN Cytochrome b-245 light chain
P13639	EEF2	5.58539	16.3594	5.37615	2.92896	0.962538	proteasome	EF2_HUMAN Elongation factor 2
P13640	MT1G	12.4398	44.748	N/A	3.59716	N/A	N/A	MT1G_HUMAN Metallothionein-1G
P13667	PDIA4	21.473	97.2156	195.804	4.52735	9.11864	both	PDIA4_HUMAN Protein disulfide-isomerase A4
P13674	P4HA1	11.3333	24.3637	26.1368	2.14974	2.30618	both	P4HA1_HUMAN Prolyl 4-hydroxylase subunit alpha-1
P13693	TPT1	5.24277	10.8457	4.56739	2.06869	0.871178	proteasome	TCTP_HUMAN Translationally-controlled tumor protein
P13796	LCP1	N/A	N/A	20.5926	N/A	N/A	N/A	PLSL_HUMAN Plastin-2
P13798	APEH	4.84244	11.0762	7.72395	2.28731	1.59505	proteasome	ACPH_HUMAN Acylamino-acid-releasing enzyme
P13804	ETFA	17.2768	14.5497	>200	0.842149	11.5762	lysosome	ETFA_HUMAN Electron transfer flavoprotein subunit alpha, mitochondrial
P13929	ENO3	14.8936	55.4962	14.3866	3.72618	0.965961	proteasome	ENOB_HUMAN Beta-enolase
P13984	GTF2F2	10.8951	N/A	15.4307	N/A	1.4163	N/A	T2FB_HUMAN General transcription factor IIF subunit 2
P13995	MTHFD2	5.6727	N/A	4.9514	N/A	0.872848	N/A	MTDC_HUMAN Bifunctional methylenetetrahydrofolate dehydrogenase/cyclohydrolase, mitochondrial
P14174	MIF	14.0541	N/A	6.81695	N/A	0.485051	N/A	MIF_HUMAN Macrophage migration inhibitory factor
P14314	PRKCSH	11.9922	N/A	43.4031	N/A	3.61929	N/A	GLU2B_HUMAN Glucosidase 2 subunit beta
P14317	HCLS1	N/A	>200	N/A	N/A	N/A	N/A	HCLS1_HUMAN Hematopoietic lineage cell-specific protein
P14324	FDPS	9.38715	17.3287	7.76635	1.846	0.827339	not certain	FPPS_HUMAN Farnesyl pyrophosphate synthase
P14406	COX7A2	5.75943	16.0191	N/A	2.78137	N/A	N/A	CX7A2_HUMAN Cytochrome c oxidase subunit 7A2, mitochondrial
P14550	AKR1A1	11.5294	36.8108	21.2296	3.19278	1.84135	proteasome	AK1A1_HUMAN Alcohol dehydrogenase [NADP(+)]
P14618	PKM	17.5258	N/A	14.9128	N/A	0.850904	N/A	KPYM_HUMAN Pyruvate kinase PKM
P14618-2	PKM	10.9467	20.1555	14.9708	1.84123	1.3676	not certain	KPYM_HUMAN Isoform M1 of Pyruvate kinase PKM
P14625	HSP90B1	11.9426	21.4066	156.821	1.79246	13.1312	lysosome	ENPL_HUMAN Endoplasmin
P14635	CCNB1	3.28646	15.1607	6.91833	4.61308	2.1051	both	CCNB1_HUMAN G2/mitotic-specific cyclin-B1
P14678-3	SNRPB	6.11241	13.9494	5.04841	2.28215	0.825929	proteasome	RSMB_HUMAN Isoform SM-B1 of Small nuclear ribonucleoprotein-associated proteins B and B'
P14735	IDE	N/A	45.8128	N/A	N/A	N/A	N/A	IDE_HUMAN Insulin-degrading enzyme
P14854	COX6B1	N/A	N/A	7.09102	N/A	N/A	N/A	CX6B1_HUMAN Cytochrome c oxidase subunit 6B1
P14866	HNRNPL	9.32652	>200	14.8172	21.4442	1.58871	proteasome	HNRPL_HUMAN Heterogeneous nuclear ribonucleoprotein L
P14868	DARS	7.51053	14.4016	10.7765	1.91752	1.43486	not certain	SYDC_HUMAN Aspartate--tRNA ligase, cytoplasmic
P14927	UQCRB	N/A	6.44668	3.99071	N/A	N/A	N/A	QCR7_HUMAN Cytochrome b-c1 complex subunit 7
P14927-2	UQCRB	4.70345	7.86149	6.17228	1.67143	1.31229	not certain	QCR7_HUMAN Isoform 2 of Cytochrome b-c1 complex subunit 7
P15104	GLUL	N/A	5.73323	4.89165	N/A	N/A	N/A	GLNA_HUMAN Glutamine synthetase
P15170-3	GSPT1	10.0065	>200	19.9869	19.9871	1.9974	proteasome	ERF3A_HUMAN Isoform 3 of Eukaryotic peptide chain release factor GTP-binding subunit ERF3A
P15291	B4GALT1	6.65847	8.66651	8.95886	1.30158	1.34548	not certain	B4GT1_HUMAN Beta-1,4-galactosyltransferase 1
P15311	EZR	15.0162	42.1622	43.8701	2.80779	2.92152	both	EZRI_HUMAN Ezrin
P15408	FOSL2	3.3262	13.8325	3.84526	4.15865	1.15605	proteasome	FOSL2_HUMAN Fos-related antigen 2
P15514	AREG	2.21743	3.16087	N/A	1.42546	N/A	N/A	AREG_HUMAN Amphiregulin
P15559	NQO1	4.53008	9.28654	7.18958	2.04997	1.58708	proteasome	NQO1_HUMAN NAD(P)H dehydrogenase [quinone] 1
P15586	GNS	4.28662	N/A	10.2385	N/A	2.38848	N/A	GNS_HUMAN N-acetylglucosamine-6-sulfatase
P15822	HIVEP1	N/A	17.5792	N/A	N/A	N/A	N/A	ZEP1_HUMAN Zinc finger protein 40
P15880	RPS2	5.29767	8.29223	4.09783	1.56526	0.773515	not certain	RS2_HUMAN 40S ribosomal protein S2
P15923	TCF3	N/A	89.7859	6.13839	N/A	N/A	N/A	TFE2_HUMAN Transcription factor E2-alpha
P15927-3	RPA2	20.8779	54.5356	23.5845	2.61212	1.12964	proteasome	RFA2_HUMAN Isoform 3 of Replication protein A 32 kDa subunit
P16104	H2AFX	N/A	14.2711	15.0162	N/A	N/A	N/A	H2AX_HUMAN Histone H2AX
P16152	CBR1	12.7981	35.0428	27.6705	2.73812	2.16208	both	CBR1_HUMAN Carbonyl reductase [NADPH] 1
P16278	GLB1	N/A	8.72981	7.34811	N/A	N/A	N/A	BGAL_HUMAN Beta-galactosidase
P16333	NCK1	N/A	35.2388	15.2777	N/A	N/A	N/A	NCK1_HUMAN Cytoplasmic protein NCK1
P16401	HIST1H1B	24.1179	>200	26.4056	8.29261	1.09486	proteasome	H15_HUMAN Histone H1.5
P16402	HIST1H1D	20.0274	>200	42.4983	9.98634	2.12201	both	H13_HUMAN Histone H1.3
P16403	HIST1H1C	16.7751	>200	49.7236	11.9224	2.96413	both	H12_HUMAN Histone H1.2
P16435	POR	11.8487	33.534	27.9495	2.83019	2.35887	both	NCPR_HUMAN NADPH--cytochrome P450 reductase
P16455	MGMT	11.5969	78.6773	N/A	6.78434	N/A	N/A	MGMT_HUMAN Methylated-DNA--protein-cysteine methyltransferase
P16615	ATP2A2	8.74965	155.066	9.85704	17.7226	1.12656	proteasome	AT2A2_HUMAN Sarcoplasmic/endoplasmic reticulum calcium ATPase 2
P16989	YBX3	9.46793	>200	73.1168	21.1239	7.72257	both	YBOX3_HUMAN Y-box-binding protein 3
P17010	ZFX	10.7548	44.7769	N/A	4.16344	N/A	N/A	ZFX_HUMAN Zinc finger X-chromosomal protein
P17028	ZNF24	N/A	N/A	13.8242	N/A	N/A	N/A	ZNF24_HUMAN Zinc finger protein 24
P17029	ZKSCAN1	5.99764	13.3786	9.03712	2.23065	1.50678	proteasome	ZKSC1_HUMAN Zinc finger protein with KRAB and SCAN domains 1
P17036	ZNF3	N/A	N/A	3.65912	N/A	N/A	N/A	ZNF3_HUMAN Zinc finger protein 3
P17066	HSPA6	N/A	N/A	10.3532	N/A	N/A	N/A	HSP76_HUMAN Heat shock 70 kDa protein 6
P17152	TMEM11	N/A	>200	N/A	N/A	N/A	N/A	TMM11_HUMAN Transmembrane protein 11, mitochondrial
P17252	PRKCA	12.9246	50.301	32.8506	3.89187	2.54171	both	KPCA_HUMAN Protein kinase C alpha type
P17275	JUNB	2.12147	7.81892	2.95346	3.68562	1.39218	proteasome	JUNB_HUMAN Transcription factor jun-B
P17480	UBTF	11.2927	17.0432	7.89731	1.50922	0.699328	not certain	UBF1_HUMAN Nucleolar transcription factor 1
P17535	JUND	N/A	6.2283	4.87103	N/A	N/A	N/A	JUND_HUMAN Transcription factor jun-D
P17568	NDUFB7	2.45971	5.01554	1.81528	2.03907	0.738005	proteasome	NDUB7_HUMAN NADH dehydrogenase [ubiquinone] 1 beta subcomplex subunit 7
P17612	PRKACA	9.21738	24.6672	12.7206	2.67616	1.38007	proteasome	KAPCA_HUMAN cAMP-dependent protein kinase catalytic subunit alpha
P17676	CEBPB	5.13709	N/A	N/A	N/A	N/A	N/A	CEBPB_HUMAN CCAAT/enhancer-binding protein beta
P17706	PTPN2	13.3272	22.5121	32.742	1.68918	2.45678	lysosome	PTN2_HUMAN Tyrosine-protein phosphatase non-receptor type 2
P17812	CTPS1	20.9094	23.5845	16.9019	1.12793	0.808339	not certain	PYRG1_HUMAN CTP synthase 1
P17844	DDX5	10.1724	12.1797	11.3855	1.19733	1.11925	not certain	DDX5_HUMAN Probable ATP-dependent RNA helicase DDX5
P17858	PFKL	N/A	11.3668	N/A	N/A	N/A	N/A	K6PL_HUMAN 6-phosphofructokinase, liver type
P17858-2	PFKL	5.8627	6.65592	8.23802	1.1353	1.40516	not certain	K6PL_HUMAN Isoform 2 of 6-phosphofructokinase, liver type
P17931	LGALS3	12.1349	15.5763	10.672	1.2836	0.879446	not certain	LEG3_HUMAN Galectin-3
P17980	PSMC3	4.01429	9.27908	5.62574	2.31151	1.40143	proteasome	PRS6A_HUMAN 26S protease regulatory subunit 6A
P17987	TCP1	23.2055	30.2817	>200	1.30494	8.61866	lysosome	TCPA_HUMAN T-complex protein 1 subunit alpha
P18031	PTPN1	13.1253	22.9215	19.2916	1.74636	1.4698	not certain	PTN1_HUMAN Tyrosine-protein phosphatase non-receptor type 1
P18065	IGFBP2	0.708595	N/A	N/A	N/A	N/A	N/A	IBP2_HUMAN Insulin-like growth factor-binding protein 2
P18077	RPL35A	7.66332	9.68353	6.34692	1.26362	0.828221	not certain	RL35A_HUMAN 60S ribosomal protein L35a
P18084	ITGB5	7.72051	N/A	N/A	N/A	N/A	N/A	ITB5_HUMAN Integrin beta-5
P18124	RPL7	12.9126	>200	14.1372	15.4888	1.09484	proteasome	RL7_HUMAN 60S ribosomal protein L7
P18146	EGR1	1.93882	N/A	N/A	N/A	N/A	N/A	EGR1_HUMAN Early growth response protein 1
P18206	VCL	13.4959	36.597	84.3245	2.71172	6.24818	both	VINC_HUMAN Vinculin
P18583-9	SON	12.1264	N/A	7.94985	N/A	0.65558	N/A	SON_HUMAN Isoform I of Protein SON
P18615	NELFE	14.0998	26.7109	7.56628	1.89441	0.536623	not certain	NELFE_HUMAN Negative elongation factor E
P18621-3	RPL17	7.28555	9.55538	6.98104	1.31155	0.958203	not certain	RL17_HUMAN Isoform 3 of 60S ribosomal protein L17
P18669	PGAM1	16.8649	177.73	15.5904	10.5385	0.924426	proteasome	PGAM1_HUMAN Phosphoglycerate mutase 1
P18754-2	RCC1	N/A	76.8456	30.2949	N/A	N/A	N/A	RCC1_HUMAN Isoform 2 of Regulator of chromosome condensation
P18827	SDC1	5.01554	5.67177	8.88309	1.13084	1.77111	not certain	SDC1_HUMAN Syndecan-1
P18846	ATF1	N/A	N/A	39.7903	N/A	N/A	N/A	ATF1_HUMAN Cyclic AMP-dependent transcription factor ATF-1
P18858	LIG1	14.037	53.7323	11.9077	3.82791	0.848308	proteasome	DNLI1_HUMAN DNA ligase 1
P18887	XRCC1	N/A	14.5253	16.8854	N/A	N/A	N/A	XRCC1_HUMAN DNA repair protein XRCC1
P19338	NCL	10.8491	>200	30.9856	18.4348	2.85606	both	NUCL_HUMAN Nucleolin
P19367-3	HK1	14.4165	16.9102	13.3169	1.17297	0.923727	not certain	HXK1_HUMAN Isoform 3 of Hexokinase-1
P19388	POLR2E	N/A	15.0684	5.38953	N/A	N/A	N/A	RPAB1_HUMAN DNA-directed RNA polymerases I, II, and III subunit RPABC1
P19404	NDUFV2	4.26054	10.5022	5.2547	2.465	1.23334	proteasome	NDUV2_HUMAN NADH dehydrogenase [ubiquinone] flavoprotein 2, mitochondrial
P19419	ELK1	4.58249	N/A	N/A	N/A	N/A	N/A	ELK1_HUMAN ETS domain-containing protein Elk-1
P19447	ERCC3	4.15955	N/A	N/A	N/A	N/A	N/A	ERCC3_HUMAN TFIIH basal transcription factor complex helicase XPB subunit
P19525	EIF2AK2	12.4131	54.1099	14.6574	4.35909	1.1808	proteasome	E2AK2_HUMAN Interferon-induced, double-stranded RNA-activated protein kinase
P19623	SRM	N/A	N/A	30.0454	N/A	N/A	N/A	SPEE_HUMAN Spermidine synthase
P19784	CSNK2A2	14.4737	N/A	17.7366	N/A	1.22544	N/A	CSK22_HUMAN Casein kinase II subunit alpha'
P19793	RXRA	N/A	17.0306	N/A	N/A	N/A	N/A	RXRA_HUMAN Retinoic acid receptor RXR-alpha
P19838-2	NFKB1	10.2461	10.4975	18.15	1.02453	1.77141	not certain	NFKB1_HUMAN Isoform 2 of Nuclear factor NF-kappa-B p105 subunit
P20042	EIF2S2	12.6487	>200	50.78	15.8119	4.01465	both	IF2B_HUMAN Eukaryotic translation initiation factor 2 subunit 2
P20248	CCNA2	N/A	12.2313	10.0456	N/A	N/A	N/A	CCNA2_HUMAN Cyclin-A2
P20290	BTF3	7.84369	>200	11.0233	25.4982	1.40538	proteasome	BTF3_HUMAN Transcription factor BTF3
P20338	RAB4A	N/A	36.1957	>200	N/A	N/A	N/A	RAB4A_HUMAN Ras-related protein Rab-4A
P20339	RAB5A	12.573	16.2482	79.0362	1.29231	6.2862	lysosome	RAB5A_HUMAN Ras-related protein Rab-5A
P20340-2	RAB6A	12.1222	41.781	27.7926	3.44665	2.2927	both	RAB6A_HUMAN Isoform 2 of Ras-related protein Rab-6A
P20393	NR1D1	N/A	9.85424	N/A	N/A	N/A	N/A	NR1D1_HUMAN Nuclear receptor subfamily 1 group D member 1
P20618	PSMB1	0.965386	1.31367	0.910801	1.36078	0.943458	not certain	PSB1_HUMAN Proteasome subunit beta type-1
P20645	M6PR	N/A	20.1145	N/A	N/A	N/A	N/A	MPRD_HUMAN Cation-dependent mannose-6-phosphate receptor
P20671	HIST1H2AD	15.7641	N/A	N/A	N/A	N/A	N/A	H2A1D_HUMAN Histone H2A type 1-D
P20674	COX5A	8.61373	N/A	N/A	N/A	N/A	N/A	COX5A_HUMAN Cytochrome c oxidase subunit 5A, mitochondrial
P20700	LMNB1	8.48198	9.35674	12.927	1.10313	1.52406	not certain	LMNB1_HUMAN Lamin-B1
P20839-6	IMPDH1	10.4248	38.359	12.9851	3.67958	1.2456	proteasome	IMDH1_HUMAN Isoform 6 of Inosine-5'-monophosphate dehydrogenase 1
P20962	PTMS	N/A	>200	17.2425	N/A	N/A	N/A	PTMS_HUMAN Parathymosin
P21127	CDK11B	6.94258	15.3216	13.2432	2.2069	1.90753	proteasome	CD11B_HUMAN Cyclin-dependent kinase 11B
P21266	GSTM3	15.1375	16.0898	25.0505	1.06291	1.65486	not certain	GSTM3_HUMAN Glutathione S-transferase Mu 3
P21281	ATP6V1B2	N/A	22.6371	>200	N/A	N/A	N/A	VATB2_HUMAN V-type proton ATPase subunit B, brain isoform
P21283	ATP6V1C1	8.90706	14.1084	12.6556	1.58396	1.42085	not certain	VATC1_HUMAN V-type proton ATPase subunit C 1
P21291	CSRP1	19.6805	25.6911	12.227	1.30541	0.621274	not certain	CSRP1_HUMAN Cysteine and glycine-rich protein 1
P21333	FLNA	12.9973	33.9279	32.5116	2.61038	2.50141	both	FLNA_HUMAN Filamin-A
P21399	ACO1	13.1054	28.9777	16.7914	2.21112	1.28125	proteasome	ACOC_HUMAN Cytoplasmic aconitate hydratase
P21579	SYT1	N/A	N/A	18.131	N/A	N/A	N/A	SYT1_HUMAN Synaptotagmin-1
P21580	TNFAIP3	4.25975	10.0748	6.31339	2.36512	1.4821	proteasome	TNAP3_HUMAN Tumor necrosis factor alpha-induced protein 3
P21741	MDK	0.491545	N/A	0.660492	N/A	1.34371	N/A	MK_HUMAN Midkine
P21781	FGF7	N/A	16.2711	5.59486	N/A	N/A	N/A	FGF7_HUMAN Fibroblast growth factor 7
P21796	VDAC1	19.2327	23.425	26.2357	1.21798	1.36412	not certain	VDAC1_HUMAN Voltage-dependent anion-selective channel protein 1
P21860	ERBB3	4.19479	5.34053	N/A	1.27313	N/A	N/A	ERBB3_HUMAN Receptor tyrosine-protein kinase erbB-3
P21912	SDHB	9.01245	22.4975	8.43347	2.49627	0.935759	proteasome	DHSB_HUMAN Succinate dehydrogenase [ubiquinone] iron-sulfur subunit, mitochondrial
P21926	CD9	14.4647	>200	55.8539	13.8268	3.8614	both	CD9_HUMAN CD9 antigen
P21964	COMT	N/A	N/A	11.0111	N/A	N/A	N/A	COMT_HUMAN Catechol O-methyltransferase
P22033	MUT	6.60392	N/A	7.00573	N/A	1.06084	N/A	MUTA_HUMAN Methylmalonyl-CoA mutase, mitochondrial
P22059	OSBP	9.2395	46.2715	45.9038	5.00801	4.96821	both	OSBP1_HUMAN Oxysterol-binding protein 1
P22061	PCMT1	N/A	12.6625	N/A	N/A	N/A	N/A	PIMT_HUMAN Protein-L-isoaspartate(D-aspartate) O-methyltransferase
P22061-2	PCMT1	10.2234	13.6931	8.98674	1.33939	0.879035	not certain	PIMT_HUMAN Isoform 2 of Protein-L-isoaspartate(D-aspartate) O-methyltransferase
P22087	FBL	12.6096	8.82878	11.0041	0.700166	0.872678	not certain	FBRL_HUMAN rRNA 2'-O-methyltransferase fibrillarin
P22234	PAICS	N/A	>200	N/A	N/A	N/A	N/A	PUR6_HUMAN Multifunctional protein ADE2
P22234-2	PAICS	11.6222	>200	65.5768	17.2085	5.64238	both	PUR6_HUMAN Isoform 2 of Multifunctional protein ADE2
P22307	SCP2	27.2356	>200	36.3285	7.34332	1.33386	proteasome	NLTP_HUMAN Non-specific lipid-transfer protein
P22314	UBA1	14.4496	30.2684	63.6499	2.09476	4.40496	both	UBA1_HUMAN Ubiquitin-like modifier-activating enzyme 1
P22392-2	NME2	13.8991	95.871	10.7182	6.89765	0.771146	proteasome	NDKB_HUMAN Isoform 3 of Nucleoside diphosphate kinase B
P22570-3	FDXR	19.6248	N/A	>200	N/A	10.1912	N/A	ADRO_HUMAN Isoform 3 of NADPH:adrenodoxin oxidoreductase, mitochondrial
P22626	HNRNPA2B1	13.955	26.3855	9.77503	1.89075	0.700465	not certain	ROA2_HUMAN Heterogeneous nuclear ribonucleoproteins A2/B1
P22670	RFX1	N/A	23.3619	N/A	N/A	N/A	N/A	RFX1_HUMAN MHC class II regulatory factor RFX1
P22694-2	PRKACB	11.3855	17.1021	7.16135	1.5021	0.628991	not certain	KAPCB_HUMAN Isoform 2 of cAMP-dependent protein kinase catalytic subunit beta
P22695	UQCRC2	10.672	17.2768	22.3164	1.61889	2.09111	lysosome	QCR2_HUMAN Cytochrome b-c1 complex subunit 2, mitochondrial
P22736-2	NR4A1	N/A	N/A	1.46623	N/A	N/A	N/A	NR4A1_HUMAN Isoform 2 of Nuclear receptor subfamily 4 group A member 1
P22830-2	FECH	8.36629	N/A	15.6785	N/A	1.87401	N/A	HEMH_HUMAN Isoform 2 of Ferrochelatase, mitochondrial
P23025	XPA	N/A	9.01831	12.0338	N/A	N/A	N/A	XPA_HUMAN DNA repair protein complementing XP-A cells
P23193	TCEA1	9.48477	N/A	8.26356	N/A	0.871245	N/A	TCEA1_HUMAN Transcription elongation factor A protein 1
P23246	SFPQ	8.79963	25.9411	14.5895	2.94798	1.65797	proteasome	SFPQ_HUMAN Splicing factor, proline- and glutamine-rich
P23284	PPIB	8.78291	17.5258	44.8349	1.99545	5.10479	lysosome	PPIB_HUMAN Peptidyl-prolyl cis-trans isomerase B
P23381	WARS	9.97621	81.4509	12.9924	8.16451	1.30234	proteasome	SYWC_HUMAN Tryptophan--tRNA ligase, cytoplasmic
P23396	RPS3	N/A	21.2948	N/A	N/A	N/A	N/A	RS3_HUMAN 40S ribosomal protein S3
P23396-2	RPS3	5.73607	19.2755	6.31167	3.3604	1.10035	proteasome	RS3_HUMAN Isoform 2 of 40S ribosomal protein S3
P23443	RPS6KB1	7.44359	27.0338	7.09974	3.63183	0.953805	proteasome	KS6B1_HUMAN Ribosomal protein S6 kinase beta-1
P23458	JAK1	1.7672	6.88261	2.85704	3.89465	1.61671	proteasome	JAK1_HUMAN Tyrosine-protein kinase JAK1
P23470	PTPRG	29.7744	N/A	45.5419	N/A	1.52957	N/A	PTPRG_HUMAN Receptor-type tyrosine-protein phosphatase gamma
P23497	SP100	10.7332	13.9973	13.5911	1.30412	1.26627	not certain	SP100_HUMAN Nuclear autoantigen Sp-100
P23511	NFYA	N/A	N/A	28.2341	N/A	N/A	N/A	NFYA_HUMAN Nuclear transcription factor Y subunit alpha
P23526	AHCY	8.56266	10.2704	24.3295	1.19944	2.84135	lysosome	SAHH_HUMAN Adenosylhomocysteinase
P23528	CFL1	10.1784	21.3407	7.91083	2.09667	0.77722	proteasome	COF1_HUMAN Cofilin-1
P23588	EIF4B	9.35548	16.2634	97.6264	1.73839	10.4352	lysosome	IF4B_HUMAN Eukaryotic translation initiation factor 4B
P23763	VAMP1	17.7776	N/A	11.7722	N/A	0.662194	N/A	VAMP1_HUMAN Vesicle-associated membrane protein 1
P23771-2	GATA3	6.45509	9.67542	N/A	1.49888	N/A	N/A	GATA3_HUMAN Isoform 2 of Trans-acting T-cell-specific transcription factor GATA-3
P23786	CPT2	14.7919	20.068	21.6406	1.35669	1.463	not certain	CPT2_HUMAN Carnitine O-palmitoyltransferase 2, mitochondrial
P23919	DTYMK	13.012	141.171	20.5134	10.8493	1.5765	proteasome	KTHY_HUMAN Thymidylate kinase
P23921	RRM1	5.67549	7.29091	5.71197	1.28463	1.00643	not certain	RIR1_HUMAN Ribonucleoside-diphosphate reductase large subunit
P24311	COX7B	N/A	N/A	31.5354	N/A	N/A	N/A	COX7B_HUMAN Cytochrome c oxidase subunit 7B, mitochondrial
P24390	KDELR1	18.4201	11.1456	103.609	0.605081	5.62481	lysosome	ERD21_HUMAN ER lumen protein retaining receptor 1
P24468	NR2F2	6.41744	N/A	6.84657	N/A	1.06687	N/A	COT2_HUMAN COUP transcription factor 2
P24534	EEF1B2	12.3776	147.478	18.6581	11.9149	1.5074	proteasome	EF1B_HUMAN Elongation factor 1-beta
P24539	ATP5F1	11.0497	28.4193	22.6519	2.57196	2.05	both	AT5F1_HUMAN ATP synthase F(0) complex subunit B1, mitochondrial
P24666	ACP1	14.0712	>200	N/A	14.2134	N/A	N/A	PPAC_HUMAN Low molecular weight phosphotyrosine protein phosphatase
P24752	ACAT1	9.46793	9.76814	10.1888	1.03171	1.07614	not certain	THIL_HUMAN Acetyl-CoA acetyltransferase, mitochondrial
P24928	POLR2A	N/A	N/A	2.10127	N/A	N/A	N/A	RPB1_HUMAN DNA-directed RNA polymerase II subunit RPB1
P24941	CDK2	11.6144	26.1861	12.7604	2.25463	1.09867	proteasome	CDK2_HUMAN Cyclin-dependent kinase 2
P25054	APC	N/A	N/A	7.26569	N/A	N/A	N/A	APC_HUMAN Adenomatous polyposis coli protein
P25098	ADRBK1	N/A	15.5589	8.66001	N/A	N/A	N/A	ARBK1_HUMAN Beta-adrenergic receptor kinase 1
P25106	ACKR3	N/A	N/A	2.82571	N/A	N/A	N/A	ACKR3_HUMAN Atypical chemokine receptor 3
P25205	MCM3	10.5038	10.7732	13.6527	1.02565	1.29978	not certain	MCM3_HUMAN DNA replication licensing factor MCM3
P25398	RPS12	12.2356	24.5362	9.17468	2.00531	0.749835	proteasome	RS12_HUMAN 40S ribosomal protein S12
P25440-2	BRD2	4.11754	9.76814	6.30535	2.37232	1.53134	proteasome	BRD2_HUMAN Isoform 2 of Bromodomain-containing protein 2
P25490	YY1	10.6474	17.0223	15.531	1.59872	1.45866	not certain	TYY1_HUMAN Transcriptional repressor protein YY1
P25685	DNAJB1	8.02625	>200	18.9695	24.9182	2.36344	both	DNJB1_HUMAN DnaJ homolog subfamily B member 1
P25705	ATP5A1	10.1829	15.2608	57.5226	1.49868	5.64896	lysosome	ATPA_HUMAN ATP synthase subunit alpha, mitochondrial
P25786-2	PSMA1	1.99846	2.16785	2.66657	1.08476	1.33431	not certain	PSA1_HUMAN Isoform Long of Proteasome subunit alpha type-1
P25787	PSMA2	N/A	2.09309	N/A	N/A	N/A	N/A	PSA2_HUMAN Proteasome subunit alpha type-2
P25788	PSMA3	1.70445	3.41687	2.33406	2.00468	1.3694	proteasome	PSA3_HUMAN Proteasome subunit alpha type-3
P25789	PSMA4	1.97018	2.68672	2.24756	1.3637	1.14079	not certain	PSA4_HUMAN Proteasome subunit alpha type-4
P25815	S100P	N/A	N/A	27.4188	N/A	N/A	N/A	S100P_HUMAN Protein S100-P
P26196	DDX6	10.234	11.9653	13.7885	1.16917	1.34732	not certain	DDX6_HUMAN Probable ATP-dependent RNA helicase DDX6
P26232	CTNNA2	6.67193	17.2898	9.34791	2.59142	1.40108	proteasome	CTNA2_HUMAN Catenin alpha-2
P26358-2	DNMT1	20.0854	22.5487	>200	1.12264	9.95748	lysosome	DNMT1_HUMAN Isoform 2 of DNA (cytosine-5)-methyltransferase 1
P26368	U2AF2	12.5525	12.4331	15.9711	0.990493	1.27235	not certain	U2AF2_HUMAN Splicing factor U2AF 65 kDa subunit
P26373	RPL13	5.5474	10.1575	3.44781	1.83104	0.621518	not certain	RL13_HUMAN 60S ribosomal protein L13
P26440	IVD	5.09854	6.91557	6.1422	1.35638	1.2047	not certain	IVD_HUMAN Isovaleryl-CoA dehydrogenase, mitochondrial
P26572	MGAT1	N/A	N/A	>200	N/A	N/A	N/A	MGAT1_HUMAN Alpha-1,3-mannosyl-glycoprotein 2-beta-N-acetylglucosaminyltransferase
P26583	HMGB2	17.6328	42.2393	21.8245	2.39549	1.23772	proteasome	HMGB2_HUMAN High mobility group protein B2
P26599-3	PTBP1	12.6487	14.3538	20.7965	1.13481	1.64416	not certain	PTBP1_HUMAN Isoform 3 of Polypyrimidine tract-binding protein 1
P26639-2	TARS	N/A	20.3567	N/A	N/A	N/A	N/A	SYTC_HUMAN Isoform 2 of Threonine--tRNA ligase, cytoplasmic
P26640	VARS	14.3153	18.0931	23.0972	1.2639	1.61346	not certain	SYVC_HUMAN Valine--tRNA ligase
P26641	EEF1G	13.986	10.7465	44.0373	0.768372	3.14867	lysosome	EF1G_HUMAN Elongation factor 1-gamma
P26885	FKBP2	24.0176	N/A	71.5322	N/A	2.97833	N/A	FKBP2_HUMAN Peptidyl-prolyl cis-trans isomerase FKBP2
P27105	STOM	11.44	14.5895	19.4268	1.27531	1.69815	not certain	STOM_HUMAN Erythrocyte band 7 integral membrane protein
P27144	AK4	17.5926	32.5421	18.0179	1.84977	1.02417	not certain	KAD4_HUMAN Adenylate kinase 4, mitochondrial
P27348	YWHAQ	13.6769	47.0568	23.7786	3.4406	1.73859	proteasome	1433T_HUMAN 14-3-3 protein theta
P27361	MAPK3	10.0587	47.7374	15.5275	4.74587	1.54368	proteasome	MK03_HUMAN Mitogen-activated protein kinase 3
P27448	MARK3	N/A	>200	N/A	N/A	N/A	N/A	MARK3_HUMAN MAP/microtubule affinity-regulating kinase 3
P27448-7	MARK3	7.39436	20.809	12.1095	2.81417	1.63767	proteasome	MARK3_HUMAN Isoform 6 of MAP/microtubule affinity-regulating kinase 3
P27635	RPL10	5.44542	10.3455	4.72042	1.89985	0.866862	not certain	RL10_HUMAN 60S ribosomal protein L10
P27694	RPA1	12.0778	13.2584	189.903	1.09774	15.7233	lysosome	RFA1_HUMAN Replication protein A 70 kDa DNA-binding subunit
P27695	APEX1	17.8738	>200	30.1631	11.1895	1.68755	proteasome	APEX1_HUMAN DNA-(apurinic or apyrimidinic site) lyase
P27797	CALR	15.417	56.9086	>200	3.6913	12.9727	both	CALR_HUMAN Calreticulin
P27816	MAP4	11.5563	23.5764	>200	2.04014	17.3066	both	MAP4_HUMAN Microtubule-associated protein 4
P27824	CANX	15.3623	22.9823	104.076	1.49602	6.77477	lysosome	CALX_HUMAN Calnexin
P27986-4	PIK3R1	5.02426	N/A	N/A	N/A	N/A	N/A	P85A_HUMAN Isoform 4 of Phosphatidylinositol 3-kinase regulatory subunit alpha
P28066	PSMA5	N/A	19.1213	N/A	N/A	N/A	N/A	PSA5_HUMAN Proteasome subunit alpha type-5
P28288	ABCD3	16.9308	25.2421	N/A	1.4909	N/A	N/A	ABCD3_HUMAN ATP-binding cassette sub-family D member 3
P28324	ELK4	N/A	12.1605	N/A	N/A	N/A	N/A	ELK4_HUMAN ETS domain-containing protein Elk-4
P28331-2	NDUFS1	3.60676	N/A	3.57514	N/A	0.991232	N/A	NDUS1_HUMAN Isoform 2 of NADH-ubiquinone oxidoreductase 75 kDa subunit, mitochondrial
P28340	POLD1	N/A	12.9078	N/A	N/A	N/A	N/A	DPOD1_HUMAN DNA polymerase delta catalytic subunit
P28347	TEAD1	N/A	55.4074	N/A	N/A	N/A	N/A	TEAD1_HUMAN Transcriptional enhancer factor TEF-1
P28360	MSX1	N/A	4.20573	1.65634	N/A	N/A	N/A	MSX1_HUMAN Homeobox protein MSX-1
P28370	SMARCA1	N/A	N/A	8.62231	N/A	N/A	N/A	SMCA1_HUMAN Probable global transcription activator SNF2L1
P28482	MAPK1	9.74205	13.6662	9.6903	1.4028	0.994688	not certain	MK01_HUMAN Mitogen-activated protein kinase 1
P28676	GCA	6.4611	39.0066	6.96001	6.03714	1.07722	proteasome	GRAN_HUMAN Grancalcin
P28702-3	RXRB	8.53945	85.7855	7.23687	10.0458	0.847463	proteasome	RXRB_HUMAN Isoform 2 of Retinoic acid receptor RXR-beta
P28838	LAP3	9.28405	26.7624	11.0886	2.88263	1.19437	proteasome	AMPL_HUMAN Cytosol aminopeptidase
P29083	GTF2E1	11.7363	N/A	N/A	N/A	N/A	N/A	T2EA_HUMAN General transcription factor IIE subunit 1
P29084	GTF2E2	13.4435	24.4928	18.3761	1.82191	1.36691	not certain	T2EB_HUMAN Transcription initiation factor IIE subunit beta
P29144	TPP2	10.9364	66.8416	N/A	6.11186	N/A	N/A	TPP2_HUMAN Tripeptidyl-peptidase 2
P29317	EPHA2	5.81548	8.90134	5.32453	1.53063	0.915578	not certain	EPHA2_HUMAN Ephrin type-A receptor 2
P29350-4	PTPN6	12.7253	N/A	N/A	N/A	N/A	N/A	PTN6_HUMAN Isoform 4 of Tyrosine-protein phosphatase non-receptor type 6
P29372	MPG	7.1695	26.4863	10.3951	3.69431	1.44991	proteasome	3MG_HUMAN DNA-3-methyladenine glycosylase
P29373	CRABP2	11.3649	>200	10.861	17.598	0.955657	proteasome	RABP2_HUMAN Cellular retinoic acid-binding protein 2
P29401-2	TKT	4.78197	12.0736	11.4931	2.52482	2.40342	both	TKT_HUMAN Isoform 2 of Transketolase
P29692-2	EEF1D	11.2946	41.2342	38.3166	3.6508	3.39248	both	EF1D_HUMAN Isoform 2 of Elongation factor 1-delta
P29992	GNA11	10.5022	16.4331	21.3342	1.56472	2.03139	lysosome	GNA11_HUMAN Guanine nucleotide-binding protein subunit alpha-11
P30038	ALDH4A1	13.103	19.9295	21.7288	1.52099	1.65831	not certain	AL4A1_HUMAN Delta-1-pyrroline-5-carboxylate dehydrogenase, mitochondrial
P30040	ERP29	12.6811	81.6428	16.2558	6.43816	1.28189	proteasome	ERP29_HUMAN Endoplasmic reticulum resident protein 29
P30041	PRDX6	10.6181	97.3521	22.0888	9.16854	2.08031	both	PRDX6_HUMAN Peroxiredoxin-6
P30042	C21orf33	17.7639	18.1976	49.5105	1.02442	2.78714	lysosome	ES1_HUMAN ES1 protein homolog, mitochondrial
P30043	BLVRB	8.73421	50.2645	5.62482	5.75489	0.643999	proteasome	BLVRB_HUMAN Flavin reductase (NADPH)
P30044	PRDX5	26.068	>200	20.3388	7.67225	0.780223	proteasome	PRDX5_HUMAN Peroxiredoxin-5, mitochondrial
P30048	PRDX3	18.131	>200	41.0146	11.0308	2.26213	both	PRDX3_HUMAN Thioredoxin-dependent peroxide reductase, mitochondrial
P30050	RPL12	3.01526	4.61299	2.72753	1.52988	0.904576	not certain	RL12_HUMAN 60S ribosomal protein L12
P30084	ECHS1	5.66436	21.4663	10.7249	3.78972	1.89339	proteasome	ECHM_HUMAN Enoyl-CoA hydratase, mitochondrial
P30085	CMPK1	16.7306	>200	10.4579	11.9542	0.625075	proteasome	KCY_HUMAN UMP-CMP kinase
P30086	PEBP1	132.028	>200	30.7246	1.51483	0.232713	not certain	PEBP1_HUMAN Phosphatidylethanolamine-binding protein 1
P30101	PDIA3	14.1257	36.4431	>200	2.57992	14.1586	both	PDIA3_HUMAN Protein disulfide-isomerase A3
P30153	PPP2R1A	6.57385	20.7716	5.53058	3.15972	0.841299	proteasome	2AAA_HUMAN Serine/threonine-protein phosphatase 2A 65 kDa regulatory subunit A alpha isoform
P30281	CCND3	N/A	17.6868	N/A	N/A	N/A	N/A	CCND3_HUMAN G1/S-specific cyclin-D3
P30405	PPIF	15.3216	43.9814	19.2648	2.87056	1.25737	proteasome	PPIF_HUMAN Peptidyl-prolyl cis-trans isomerase F, mitochondrial
P30419	NMT1	14.5803	34.9898	17.7321	2.3998	1.21617	proteasome	NMT1_HUMAN Glycylpeptide N-tetradecanoyltransferase 1
P30457	HLA-A	N/A	N/A	7.02918	N/A	N/A	N/A	1A66_HUMAN HLA class I histocompatibility antigen, A-66 alpha chain
P30519	HMOX2	12.3095	83.311	18.0038	6.76803	1.4626	proteasome	HMOX2_HUMAN Heme oxygenase 2
P30520	ADSS	17.6328	>200	N/A	11.3425	N/A	N/A	PURA2_HUMAN Adenylosuccinate synthetase isozyme 2
P30533	LRPAP1	N/A	N/A	28.4894	N/A	N/A	N/A	AMRP_HUMAN Alpha-2-macroglobulin receptor-associated protein
P30536	TSPO	N/A	72.9629	17.0936	N/A	N/A	N/A	TSPOA_HUMAN Translocator protein
P30613	PKLR	10.2552	34.3653	16.0339	3.35102	1.5635	proteasome	KPYR_HUMAN Pyruvate kinase PKLR
P30626	SRI	11.0886	>200	N/A	18.0366	N/A	N/A	SORCN_HUMAN Sorcin
P30740	SERPINB1	14.7228	47.0249	N/A	3.19403	N/A	N/A	ILEU_HUMAN Leukocyte elastase inhibitor
P30837	ALDH1B1	N/A	N/A	10.0851	N/A	N/A	N/A	AL1B1_HUMAN Aldehyde dehydrogenase X, mitochondrial
P30876	POLR2B	N/A	15.8942	N/A	N/A	N/A	N/A	RPB2_HUMAN DNA-directed RNA polymerase II subunit RPB2
P31040	SDHA	N/A	5.92484	4.13301	N/A	N/A	N/A	DHSA_HUMAN Succinate dehydrogenase [ubiquinone] flavoprotein subunit, mitochondrial
P31146	CORO1A	6.10004	N/A	9.72565	N/A	1.59436	N/A	COR1A_HUMAN Coronin-1A
P31150	GDI1	22.2163	55.1869	26.6698	2.48408	1.20046	proteasome	GDIA_HUMAN Rab GDP dissociation inhibitor alpha
P31153	MAT2A	7.1547	36.3285	8.50279	5.07757	1.18842	proteasome	METK2_HUMAN S-adenosylmethionine synthase isoform type-2
P31350-2	RRM2	3.82489	21.0491	6.00804	5.50319	1.57077	proteasome	RIR2_HUMAN Isoform 2 of Ribonucleoside-diphosphate reductase subunit M2
P31431	SDC4	4.70249	3.30874	N/A	0.703614	N/A	N/A	SDC4_HUMAN Syndecan-4
P31483	TIA1	7.66841	36.9285	11.5198	4.81566	1.50224	proteasome	TIA1_HUMAN Nucleolysin TIA-1 isoform p40
P31641	SLC6A6	3.62051	N/A	N/A	N/A	N/A	N/A	SC6A6_HUMAN Sodium- and chloride-dependent taurine transporter
P31689	DNAJA1	5.14701	25.6152	5.92029	4.97672	1.15024	proteasome	DNJA1_HUMAN DnaJ homolog subfamily A member 1
P31749	AKT1	10.9105	15.7749	12.4398	1.44584	1.14017	not certain	AKT1_HUMAN RAC-alpha serine/threonine-protein kinase
P31751	AKT2	10.7182	17.119	11.4249	1.59718	1.06593	not certain	AKT2_HUMAN RAC-beta serine/threonine-protein kinase
P31930	UQCRC1	20.8277	15.9785	42.9459	0.767174	2.06196	lysosome	QCR1_HUMAN Cytochrome b-c1 complex subunit 1, mitochondrial
P31937	HIBADH	N/A	18.7286	N/A	N/A	N/A	N/A	3HIDH_HUMAN 3-hydroxyisobutyrate dehydrogenase, mitochondrial
P31939	ATIC	10.1116	33.599	16.1648	3.32283	1.59865	proteasome	PUR9_HUMAN Bifunctional purine biosynthesis protein PURH
P31942	HNRNPH3	N/A	N/A	9.37572	N/A	N/A	N/A	HNRH3_HUMAN Heterogeneous nuclear ribonucleoprotein H3
P31943	HNRNPH1	19.5804	N/A	22.0047	N/A	1.12381	N/A	HNRH1_HUMAN Heterogeneous nuclear ribonucleoprotein H
P31946	YWHAB	13.0217	19.9352	19.7365	1.53092	1.51566	not certain	1433B_HUMAN 14-3-3 protein beta/alpha
P31947	SFN	N/A	199.754	15.2173	N/A	N/A	N/A	1433S_HUMAN 14-3-3 protein sigma
P31948	STIP1	12.6695	37.671	>200	2.97337	15.786	both	STIP1_HUMAN Stress-induced-phosphoprotein 1
P31949	S100A11	7.14806	>200	15.3896	27.9796	2.15298	both	S10AB_HUMAN Protein S100-A11
P32119	PRDX2	N/A	>200	N/A	N/A	N/A	N/A	PRDX2_HUMAN Peroxiredoxin-2
P32121-4	ARRB2	12.5935	N/A	N/A	N/A	N/A	N/A	ARRB2_HUMAN Isoform 4 of Beta-arrestin-2
P32321-2	DCTD	N/A	>200	N/A	N/A	N/A	N/A	DCTD_HUMAN Isoform 2 of Deoxycytidylate deaminase
P32322	PYCR1	10.018	N/A	37.3262	N/A	3.7259	N/A	P5CR1_HUMAN Pyrroline-5-carboxylate reductase 1, mitochondrial
P32519	ELF1	2.67728	N/A	N/A	N/A	N/A	N/A	ELF1_HUMAN ETS-related transcription factor Elf-1
P32969	RPL9	7.43162	16.4292	7.76723	2.21071	1.04516	proteasome	RL9_HUMAN 60S ribosomal protein L9
P33121	ACSL1	10.5086	N/A	47.2493	N/A	4.49625	N/A	ACSL1_HUMAN Long-chain-fatty-acid--CoA ligase 1
P33176	KIF5B	11.8995	194.704	>200	16.3624	16.8074	both	KINH_HUMAN Kinesin-1 heavy chain
P33316	DUT	16.3594	N/A	N/A	N/A	N/A	N/A	DUT_HUMAN Deoxyuridine 5'-triphosphate nucleotidohydrolase, mitochondrial
P33552	CKS2	0.98492	5.76806	N/A	5.85637	N/A	N/A	CKS2_HUMAN Cyclin-dependent kinases regulatory subunit 2
P33897	ABCD1	N/A	N/A	33.6643	N/A	N/A	N/A	ABCD1_HUMAN ATP-binding cassette sub-family D member 1
P33908	MAN1A1	N/A	7.23914	N/A	N/A	N/A	N/A	MA1A1_HUMAN Mannosyl-oligosaccharide 1,2-alpha-mannosidase IA
P33947	KDELR2	19.3779	11.278	43.1867	0.582005	2.22866	lysosome	ERD22_HUMAN ER lumen protein retaining receptor 2
P33981	TTK	6.67965	>200	8.55526	29.9417	1.28079	proteasome	TTK_HUMAN Dual specificity protein kinase TTK
P33991	MCM4	7.94347	8.8097	10.9588	1.10905	1.3796	not certain	MCM4_HUMAN DNA replication licensing factor MCM4
P33992	MCM5	12.2551	12.1519	11.1888	0.991585	0.912994	not certain	MCM5_HUMAN DNA replication licensing factor MCM5
P33993	MCM7	3.30369	6.11672	5.00395	1.85148	1.51465	not certain	MCM7_HUMAN DNA replication licensing factor MCM7
P34896	SHMT1	N/A	N/A	4.22728	N/A	N/A	N/A	GLYC_HUMAN Serine hydroxymethyltransferase, cytosolic
P34897	SHMT2	14.4496	19.8155	17.3939	1.37136	1.20376	not certain	GLYM_HUMAN Serine hydroxymethyltransferase, mitochondrial
P34932	HSPA4	N/A	30.4012	39.7903	N/A	N/A	N/A	HSP74_HUMAN Heat shock 70 kDa protein 4
P35080	PFN2	N/A	15.0881	7.91354	N/A	N/A	N/A	PROF2_HUMAN Profilin-2
P35080-2	PFN2	6.00075	18.0413	7.24898	3.00651	1.20801	proteasome	PROF2_HUMAN Isoform IIb of Profilin-2
P35221-2	CTNNA1	6.47317	20.5743	9.68895	3.17839	1.49679	proteasome	CTNA1_HUMAN Isoform 2 of Catenin alpha-1
P35226	BMI1	9.76264	>200	15.8361	20.4863	1.62212	proteasome	BMI1_HUMAN Polycomb complex protein BMI-1
P35227	PCGF2	11.6125	>200	20.4107	17.2229	1.75766	proteasome	PCGF2_HUMAN Polycomb group RING finger protein 2
P35232	PHB	N/A	10.3486	6.20544	N/A	N/A	N/A	PHB_HUMAN Prohibitin
P35237	SERPINB6	14.6388	32.3447	18.598	2.20952	1.27046	proteasome	SPB6_HUMAN Serpin B6
P35240-2	NF2	11.9797	30.0584	10.8135	2.50911	0.902652	proteasome	MERL_HUMAN Isoform 2 of Merlin
P35241-5	RDX	17.6104	23.4013	>200	1.32883	11.3569	lysosome	RADI_HUMAN Isoform 5 of Radixin
P35244	RPA3	N/A	N/A	8.21751	N/A	N/A	N/A	RFA3_HUMAN Replication protein A 14 kDa subunit
P35249	RFC4	11.9901	44.0373	13.266	3.67281	1.10641	proteasome	RFC4_HUMAN Replication factor C subunit 4
P35250	RFC2	5.9294	18.0978	5.10493	3.05222	0.860952	proteasome	RFC2_HUMAN Replication factor C subunit 2
P35251	RFC1	8.54155	48.4718	11.8568	5.67483	1.38813	proteasome	RFC1_HUMAN Replication factor C subunit 1
P35268	RPL22	4.20752	6.33648	3.73483	1.50599	0.887656	not certain	RL22_HUMAN 60S ribosomal protein L22
P35269	GTF2F1	9.55275	31.0411	12.9198	3.24944	1.35247	proteasome	T2FA_HUMAN General transcription factor IIF subunit 1
P35270	SPR	12.0338	N/A	14.7824	N/A	1.22841	N/A	SPRE_HUMAN Sepiapterin reductase
P35520-2	CBS	N/A	N/A	2.16961	N/A	N/A	N/A	CBS_HUMAN Isoform 2 of Cystathionine beta-synthase
P35579	MYH9	7.14511	7.55721	14.0712	1.05768	1.96935	not certain	MYH9_HUMAN Myosin-9
P35606	COPB2	11.0497	19.7422	9.76814	1.78667	0.884019	not certain	COPB2_HUMAN Coatomer subunit beta'
P35610	SOAT1	8.40382	35.9703	29.5711	4.28023	3.51877	both	SOAT1_HUMAN Sterol O-acyltransferase 1
P35611-3	ADD1	2.95409	N/A	N/A	N/A	N/A	N/A	ADDA_HUMAN Isoform 3 of Alpha-adducin
P35637	FUS	8.84568	31.6217	10.116	3.57482	1.14361	proteasome	FUS_HUMAN RNA-binding protein FUS
P35658-5	NUP214	12.1583	44.9512	19.1319	3.69715	1.57356	proteasome	NU214_HUMAN Isoform 5 of Nuclear pore complex protein Nup214
P35659	DEK	18.4593	38.1059	35.5096	2.06432	1.92367	proteasome	DEK_HUMAN Protein DEK
P35712	SOX6	N/A	9.96044	N/A	N/A	N/A	N/A	SOX6_HUMAN Transcription factor SOX-6
P35716	SOX11	N/A	>200	N/A	N/A	N/A	N/A	SOX11_HUMAN Transcription factor SOX-11
P35749-2	MYH11	5.32903	7.41889	7.62287	1.39217	1.43044	not certain	MYH11_HUMAN Isoform 2 of Myosin-11
P35813-3	PPM1A	11.595	>200	N/A	17.2489	N/A	N/A	PPM1A_HUMAN Isoform 3 of Protein phosphatase 1A
P35869	AHR	N/A	7.32559	N/A	N/A	N/A	N/A	AHR_HUMAN Aryl hydrocarbon receptor
P35914	HMGCL	23.7298	25.2329	22.4683	1.06334	0.94684	not certain	HMGCL_HUMAN Hydroxymethylglutaryl-CoA lyase, mitochondrial
P35998	PSMC2	6.41625	9.89503	5.47899	1.54218	0.853925	not certain	PRS7_HUMAN 26S protease regulatory subunit 7
P36405	ARL3	13.0709	>200	12.0129	15.3012	0.919064	proteasome	ARL3_HUMAN ADP-ribosylation factor-like protein 3
P36507	MAP2K2	9.10239	14.5834	12.6464	1.60215	1.38935	not certain	MP2K2_HUMAN Dual specificity mitogen-activated protein kinase kinase 2
P36542	ATP5C1	5.17776	6.7816	5.97489	1.30975	1.15395	not certain	ATPG_HUMAN ATP synthase subunit gamma, mitochondrial
P36543	ATP6V1E1	6.18771	39.8132	5.9213	6.43423	0.956945	proteasome	VATE1_HUMAN V-type proton ATPase subunit E 1
P36578	RPL4	6.82366	>200	5.13138	29.3098	0.751999	proteasome	RL4_HUMAN 60S ribosomal protein L4
P36776	LONP1	11.8812	8.65028	51.2683	0.728067	4.31509	lysosome	LONM_HUMAN Lon protease homolog, mitochondrial
P36957	DLST	15.3896	32.9756	57.4273	2.14272	3.73157	both	ODO2_HUMAN Dihydrolipoyllysine-residue succinyltransferase component of 2-oxoglutarate dehydrogenase complex, mitochondrial
P36969	GPX4	12.8313	19.4595	17.0181	1.51656	1.3263	not certain	GPX4_HUMAN Phospholipid hydroperoxide glutathione peroxidase, mitochondrial
P37108	SRP14	7.19704	14.6326	8.64273	2.03314	1.20087	proteasome	SRP14_HUMAN Signal recognition particle 14 kDa protein
P37198	NUP62	8.0777	23.5444	N/A	2.91474	N/A	N/A	NUP62_HUMAN Nuclear pore glycoprotein p62
P37268	FDFT1	4.3414	10.8287	N/A	2.4943	N/A	N/A	FDFT_HUMAN Squalene synthase
P37802	TAGLN2	13.6959	11.0992	7.63799	0.810408	0.557686	not certain	TAGL2_HUMAN Transgelin-2
P37837	TALDO1	17.1699	17.5658	>200	1.02306	11.6483	lysosome	TALDO_HUMAN Transaldolase
P38117	ETFB	N/A	14.3242	17.1912	N/A	N/A	N/A	ETFB_HUMAN Electron transfer flavoprotein subunit beta
P38117-2	ETFB	8.16043	13.6877	29.8642	1.67733	3.65963	lysosome	ETFB_HUMAN Isoform 2 of Electron transfer flavoprotein subunit beta
P38159	RBMX	20.0505	>200	32.8817	9.97479	1.63994	proteasome	RBMX_HUMAN RNA-binding motif protein, X chromosome
P38432	COIL	N/A	N/A	10.005	N/A	N/A	N/A	COIL_HUMAN Coilin
P38571	LIPA	N/A	5.24079	N/A	N/A	N/A	N/A	LICH_HUMAN Lysosomal acid lipase/cholesteryl ester hydrolase
P38606	ATP6V1A	N/A	4.55928	N/A	N/A	N/A	N/A	VATA_HUMAN V-type proton ATPase catalytic subunit A
P38646	HSPA9	10.9537	21.3473	20.9981	1.94888	1.91699	not certain	GRP75_HUMAN Stress-70 protein, mitochondrial
P38919	EIF4A3	9.75851	8.20778	8.79071	0.841089	0.900824	not certain	IF4A3_HUMAN Eukaryotic initiation factor 4A-III
P39019	RPS19	8.88536	27.0549	7.18138	3.04489	0.808226	proteasome	RS19_HUMAN 40S ribosomal protein S19
P39023	RPL3	3.38616	10.7765	4.19886	3.18252	1.24	proteasome	RL3_HUMAN 60S ribosomal protein L3
P39210	MPV17	13.9382	N/A	20.3747	N/A	1.46179	N/A	MPV17_HUMAN Protein Mpv17
P39656	DDOST	7.04203	11.5659	7.86238	1.64242	1.11649	not certain	OST48_HUMAN Dolichyl-diphosphooligosaccharide--protein glycosyltransferase 48 kDa subunit
P39748	FEN1	6.56079	7.47651	6.34692	1.13958	0.967402	not certain	FEN1_HUMAN Flap endonuclease 1
P39880-3	CUX1	16.5311	16.9391	22.8761	1.02468	1.38383	not certain	CUX1_HUMAN Isoform 3 of Homeobox protein cut-like 1
P40121	CAPG	N/A	N/A	24.6584	N/A	N/A	N/A	CAPG_HUMAN Macrophage-capping protein
P40227	CCT6A	5.59351	12.0736	7.50891	2.15851	1.34243	proteasome	TCPZ_HUMAN T-complex protein 1 subunit zeta
P40424	PBX1	5.83801	>200	N/A	34.2582	N/A	N/A	PBX1_HUMAN Pre-B-cell leukemia transcription factor 1
P40426	PBX3	N/A	N/A	8.35419	N/A	N/A	N/A	PBX3_HUMAN Pre-B-cell leukemia transcription factor 3
P40429	RPL13A	4.05444	7.57124	7.27637	1.86739	1.79467	not certain	RL13A_HUMAN 60S ribosomal protein L13a
P40616	ARL1	12.1031	18.5731	53.2371	1.53457	4.39862	lysosome	ARL1_HUMAN ADP-ribosylation factor-like protein 1
P40692	MLH1	N/A	7.39909	N/A	N/A	N/A	N/A	MLH1_HUMAN DNA mismatch repair protein Mlh1
P40763	STAT3	11.4836	49.0897	22.2519	4.27479	1.93772	proteasome	STAT3_HUMAN Signal transducer and activator of transcription 3
P40818	USP8	12.2681	>200	9.45502	16.3025	0.7707	proteasome	UBP8_HUMAN Ubiquitin carboxyl-terminal hydrolase 8
P40925-3	MDH1	16.0748	58.891	13.1802	3.66355	0.819928	proteasome	MDHC_HUMAN Isoform 3 of Malate dehydrogenase, cytoplasmic
P40926	MDH2	49.3695	>200	>200	4.05109	4.05109	both	MDHM_HUMAN Malate dehydrogenase, mitochondrial
P40937	RFC5	7.89012	7.29015	6.24513	0.923959	0.791513	not certain	RFC5_HUMAN Replication factor C subunit 5
P40938	RFC3	5.71904	N/A	6.54098	N/A	1.14372	N/A	RFC3_HUMAN Replication factor C subunit 3
P40939	HADHA	9.15046	13.7857	30.5755	1.50656	3.34142	lysosome	ECHA_HUMAN Trifunctional enzyme subunit alpha, mitochondrial
P41091	EIF2S3	N/A	26.5574	>200	N/A	N/A	N/A	IF2G_HUMAN Eukaryotic translation initiation factor 2 subunit 3
P41208	CETN2	N/A	N/A	11.6183	N/A	N/A	N/A	CETN2_HUMAN Centrin-2
P41212	ETV6	7.23687	54.2793	9.76952	7.50039	1.34996	proteasome	ETV6_HUMAN Transcription factor ETV6
P41214	EIF2D	11.474	35.8958	13.9635	3.12843	1.21696	proteasome	EIF2D_HUMAN Eukaryotic translation initiation factor 2D
P41223	BUD31	5.79554	21.4133	5.69882	3.69478	0.98331	proteasome	BUD31_HUMAN Protein BUD31 homolog
P41227	NAA10	3.92829	10.5743	N/A	2.69184	N/A	N/A	NAA10_HUMAN N-alpha-acetyltransferase 10
P41240	CSK	13.8768	>200	10.2325	14.4125	0.737378	proteasome	CSK_HUMAN Tyrosine-protein kinase CSK
P41250	GARS	11.8426	14.1487	13.4149	1.19473	1.13277	not certain	SYG_HUMAN Glycine--tRNA ligase
P41252	IARS	10.4911	23.1512	139.747	2.20675	13.3206	both	SYIC_HUMAN Isoleucine--tRNA ligase, cytoplasmic
P41440	SLC19A1	N/A	16.5547	N/A	N/A	N/A	N/A	S19A1_HUMAN Folate transporter 1
P41743	PRKCI	N/A	12.3798	N/A	N/A	N/A	N/A	KPCI_HUMAN Protein kinase C iota type
P42025	ACTR1B	9.21493	N/A	10.8712	N/A	1.17974	N/A	ACTY_HUMAN Beta-centractin
P42126	ECI1	7.34422	N/A	N/A	N/A	N/A	N/A	ECI1_HUMAN Enoyl-CoA delta isomerase 1, mitochondrial
P42166	TMPO	12.2964	32.7265	21.0683	2.66147	1.71337	proteasome	LAP2A_HUMAN Lamina-associated polypeptide 2, isoform alpha
P42167	TMPO	18.9695	76.2538	17.2596	4.0198	0.909861	proteasome	LAP2B_HUMAN Lamina-associated polypeptide 2, isoforms beta/gamma
P42224	STAT1	11.7782	16.116	12.2399	1.36829	1.0392	not certain	STAT1_HUMAN Signal transducer and activator of transcription 1-alpha/beta
P42285	SKIV2L2	7.52276	12.1562	N/A	1.61592	N/A	N/A	SK2L2_HUMAN Superkiller viralicidic activity 2-like 2
P42677	RPS27	2.15967	N/A	N/A	N/A	N/A	N/A	RS27_HUMAN 40S ribosomal protein S27
P42694	HELZ	N/A	19.6861	11.6125	N/A	N/A	N/A	HELZ_HUMAN Probable helicase with zinc finger domain
P42696	RBM34	6.89356	N/A	11.2964	N/A	1.63869	N/A	RBM34_HUMAN RNA-binding protein 34
P42704	LRPPRC	9.29401	9.98771	16.8117	1.07464	1.80888	not certain	LPPRC_HUMAN Leucine-rich PPR motif-containing protein, mitochondrial
P42765	ACAA2	13.0266	14.4075	23.3069	1.10601	1.78917	not certain	THIM_HUMAN 3-ketoacyl-CoA thiolase, mitochondrial
P42766	RPL35	1.68797	4.88751	1.47922	2.8955	0.876331	proteasome	RL35_HUMAN 60S ribosomal protein L35
P42892	ECE1	N/A	N/A	4.29114	N/A	N/A	N/A	ECE1_HUMAN Endothelin-converting enzyme 1
P43155	CRAT	N/A	12.1413	10.0939	N/A	N/A	N/A	CACP_HUMAN Carnitine O-acetyltransferase
P43243	MATR3	12.8289	18.15	60.9092	1.41477	4.7478	lysosome	MATR3_HUMAN Matrin-3
P43246	MSH2	N/A	7.65063	N/A	N/A	N/A	N/A	MSH2_HUMAN DNA mismatch repair protein Msh2
P43250-2	GRK6	N/A	10.7615	13.9214	N/A	N/A	N/A	GRK6_HUMAN Isoform GRK6B of G protein-coupled receptor kinase 6
P43251	BTD	N/A	N/A	24.9783	N/A	N/A	N/A	BTD_HUMAN Biotinidase
P43304	GPD2	7.6053	6.2021	18.0884	0.815497	2.37839	lysosome	GPDM_HUMAN Glycerol-3-phosphate dehydrogenase, mitochondrial
P43307	SSR1	16.8076	39.0505	>200	2.32338	11.8993	both	SSRA_HUMAN Translocon-associated protein subunit alpha
P43308	SSR2	N/A	N/A	6.84184	N/A	N/A	N/A	SSRB_HUMAN Translocon-associated protein subunit beta
P43487	RANBP1	14.3896	>200	9.74205	13.8989	0.67702	proteasome	RANG_HUMAN Ran-specific GTPase-activating protein
P43490	NAMPT	21.3736	39.7447	29.7233	1.85952	1.39065	not certain	NAMPT_HUMAN Nicotinamide phosphoribosyltransferase
P43686	PSMC4	5.29362	25.0686	6.38728	4.73562	1.2066	proteasome	PRS6B_HUMAN 26S protease regulatory subunit 6B
P43897	TSFM	N/A	N/A	53.8995	N/A	N/A	N/A	EFTS_HUMAN Elongation factor Ts, mitochondrial
P43897-2	TSFM	15.6255	16.7427	65.8885	1.0715	4.21673	lysosome	EFTS_HUMAN Isoform 2 of Elongation factor Ts, mitochondrial
P45877	PPIC	10.5454	14.4165	22.2805	1.3671	2.11283	lysosome	PPIC_HUMAN Peptidyl-prolyl cis-trans isomerase C
P45880-1	VDAC2	18.7845	25.6247	>200	1.36414	10.6471	lysosome	VDAC2_HUMAN Isoform 1 of Voltage-dependent anion-selective channel protein 2
P45954	ACADSB	15.1177	20.3807	53.0334	1.34813	3.50803	lysosome	ACDSB_HUMAN Short/branched chain specific acyl-CoA dehydrogenase, mitochondrial
P45973	CBX5	9.04184	15.4101	36.7522	1.70431	4.06469	lysosome	CBX5_HUMAN Chromobox protein homolog 5
P45974	USP5	N/A	17.8508	N/A	N/A	N/A	N/A	UBP5_HUMAN Ubiquitin carboxyl-terminal hydrolase 5
P45983	MAPK8	6.37435	N/A	N/A	N/A	N/A	N/A	MK08_HUMAN Mitogen-activated protein kinase 8
P46013	MKI67	8.98441	59.2433	16.3017	6.59402	1.81444	proteasome	KI67_HUMAN Antigen KI-67
P46019	PHKA2	10.7682	35.7477	N/A	3.31975	N/A	N/A	KPB2_HUMAN Phosphorylase b kinase regulatory subunit alpha, liver isoform
P46060	RANGAP1	7.92984	71.4585	8.74744	9.01134	1.1031	proteasome	RAGP1_HUMAN Ran GTPase-activating protein 1
P46063	RECQL	9.84025	19.6248	188.868	1.99434	19.1935	lysosome	RECQ1_HUMAN ATP-dependent DNA helicase Q1
P46087-4	NOP2	14.945	42.7605	N/A	2.8612	N/A	N/A	NOP2_HUMAN Isoform 4 of Putative ribosomal RNA methyltransferase NOP2
P46109	CRKL	N/A	>200	N/A	N/A	N/A	N/A	CRKL_HUMAN Crk-like protein
P46199	MTIF2	8.34413	13.7447	15.9491	1.64723	1.91141	not certain	IF2M_HUMAN Translation initiation factor IF-2, mitochondrial
P46379-3	BAG6	8.16043	N/A	N/A	N/A	N/A	N/A	BAG6_HUMAN Isoform 3 of Large proline-rich protein BAG6
P46379-5	BAG6	N/A	N/A	10.3285	N/A	N/A	N/A	BAG6_HUMAN Isoform 5 of Large proline-rich protein BAG6
P46459	NSF	11.6183	35.203	19.34	3.02996	1.66462	proteasome	NSF_HUMAN Vesicle-fusing ATPase
P46527	CDKN1B	N/A	10.9415	N/A	N/A	N/A	N/A	CDN1B_HUMAN Cyclin-dependent kinase inhibitor 1B
P46734-3	MAP2K3	N/A	29.1483	N/A	N/A	N/A	N/A	MP2K3_HUMAN Isoform 2 of Dual specificity mitogen-activated protein kinase kinase 3
P46776	RPL27A	9.27411	12.2033	8.90935	1.31585	0.960668	not certain	RL27A_HUMAN 60S ribosomal protein L27a
P46777	RPL5	12.81	27.129	21.1842	2.11781	1.65373	proteasome	RL5_HUMAN 60S ribosomal protein L5
P46778	RPL21	14.5344	34.3312	17.7684	2.36206	1.22251	proteasome	RL21_HUMAN 60S ribosomal protein L21
P46779-3	RPL28	7.58865	55.319	6.71915	7.2897	0.885421	proteasome	RL28_HUMAN Isoform 3 of 60S ribosomal protein L28
P46781	RPS9	5.0407	9.57518	4.87514	1.89957	0.967154	not certain	RS9_HUMAN 40S ribosomal protein S9
P46782	RPS5	1.89338	4.86795	3.60826	2.57104	1.90573	proteasome	RS5_HUMAN 40S ribosomal protein S5
P46783	RPS10	N/A	2.50369	2.02414	N/A	N/A	N/A	RS10_HUMAN 40S ribosomal protein S10
P46939-2	UTRN	N/A	N/A	56.862	N/A	N/A	N/A	UTRO_HUMAN Isoform 2 of Utrophin
P46940	IQGAP1	13.9382	24.3637	17.4245	1.74798	1.25013	not certain	IQGA1_HUMAN Ras GTPase-activating-like protein IQGAP1
P46977	STT3A	13.7366	15.9785	41.0146	1.16321	2.9858	lysosome	STT3A_HUMAN Dolichyl-diphosphooligosaccharide--protein glycosyltransferase subunit STT3A
P47755	CAPZA2	N/A	13.294	>200	N/A	N/A	N/A	CAZA2_HUMAN F-actin-capping protein subunit alpha-2
P47756	CAPZB	15.4824	21.5799	141.459	1.39384	9.13673	lysosome	CAPZB_HUMAN F-actin-capping protein subunit beta
P47756-2	CAPZB	N/A	N/A	25.1049	N/A	N/A	N/A	CAPZB_HUMAN Isoform 2 of F-actin-capping protein subunit beta
P47813	EIF1AX	10.672	17.3373	12.8171	1.62456	1.201	not certain	IF1AX_HUMAN Eukaryotic translation initiation factor 1A, X-chromosomal
P47897	QARS	14.8776	21.7424	>200	1.46142	13.443	lysosome	SYQ_HUMAN Glutamine--tRNA ligase
P47914	RPL29	3.67055	6.88329	3.81542	1.87527	1.03947	not certain	RL29_HUMAN 60S ribosomal protein L29
P47974	ZFP36L2	N/A	33.9945	N/A	N/A	N/A	N/A	TISD_HUMAN Zinc finger protein 36, C3H1 type-like 2
P47985	UQCRFS1	N/A	N/A	17.6194	N/A	N/A	N/A	UCRI_HUMAN Cytochrome b-c1 complex subunit Rieske, mitochondrial
P47989	XDH	13.6715	43.1867	28.4077	3.15888	2.07787	both	XDH_HUMAN Xanthine dehydrogenase/oxidase
P48047	ATP5O	12.1456	27.8261	11.3111	2.29105	0.931299	proteasome	ATPO_HUMAN ATP synthase subunit O, mitochondrial
P48059-3	LIMS1	10.8917	40.5824	14.9224	3.726	1.37008	proteasome	LIMS1_HUMAN Isoform 3 of LIM and senescent cell antigen-like-containing domain protein 1
P48382	RFX5	12.2011	N/A	19.0739	N/A	1.56329	N/A	RFX5_HUMAN DNA-binding protein RFX5
P48426	PIP4K2A	20.7903	N/A	N/A	N/A	N/A	N/A	PI42A_HUMAN Phosphatidylinositol 5-phosphate 4-kinase type-2 alpha
P48431	SOX2	N/A	21.3342	N/A	N/A	N/A	N/A	SOX2_HUMAN Transcription factor SOX-2
P48443	RXRG	5.9909	18.638	N/A	3.11105	N/A	N/A	RXRG_HUMAN Retinoic acid receptor RXR-gamma
P48444	ARCN1	7.94802	16.0599	45.6318	2.02062	5.74128	both	COPD_HUMAN Coatomer subunit delta
P48509	CD151	6.33416	N/A	17.9386	N/A	2.83204	N/A	CD151_HUMAN CD151 antigen
P48552	NRIP1	2.75441	8.59238	3.26756	3.1195	1.1863	proteasome	NRIP1_HUMAN Nuclear receptor-interacting protein 1
P48556	PSMD8	11.2269	20.4649	10.4927	1.82285	0.934605	not certain	PSMD8_HUMAN 26S proteasome non-ATPase regulatory subunit 8
P48634	PRRC2A	13.7666	57.9554	8.94614	4.20987	0.649845	proteasome	PRC2A_HUMAN Protein PRRC2A
P48643	CCT5	4.58309	8.30912	6.13567	1.81299	1.33876	not certain	TCPE_HUMAN T-complex protein 1 subunit epsilon
P48651	PTDSS1	18.7998	20.097	43.2406	1.06901	2.30006	lysosome	PTSS1_HUMAN Phosphatidylserine synthase 1
P48729-2	CSNK1A1	N/A	22.8761	9.41776	N/A	N/A	N/A	KC1A_HUMAN Isoform 2 of Casein kinase I isoform alpha
P48735	IDH2	14.2447	13.2053	13.1377	0.927034	0.92229	not certain	IDHP_HUMAN Isocitrate dehydrogenase [NADP], mitochondrial
P48739-2	PITPNB	10.0675	19.5694	16.9184	1.94382	1.6805	not certain	PIPNB_HUMAN Isoform 2 of Phosphatidylinositol transfer protein beta isoform
P49005	POLD2	5.96153	N/A	N/A	N/A	N/A	N/A	DPOD2_HUMAN DNA polymerase delta subunit 2
P49023-3	PXN	9.50037	98.3187	10.0777	10.3489	1.06077	proteasome	PAXI_HUMAN Isoform Gamma of Paxillin
P49069	CAMLG	12.1647	35.0961	24.1852	2.88506	1.98814	proteasome	CAMLG_HUMAN Calcium signal-modulating cyclophilin ligand
P49137	MAPKAPK2	7.25049	21.8658	6.49622	3.01577	0.89597	proteasome	MAPK2_HUMAN MAP kinase-activated protein kinase 2
P49189	ALDH9A1	N/A	83.5117	21.1454	N/A	N/A	N/A	AL9A1_HUMAN 4-trimethylaminobutyraldehyde dehydrogenase
P49207	RPL34	N/A	>200	36.3475	N/A	N/A	N/A	RL34_HUMAN 60S ribosomal protein L34
P49321-3	NASP	16.4643	N/A	N/A	N/A	N/A	N/A	NASP_HUMAN Isoform 3 of Nuclear autoantigenic sperm protein
P49326	FMO5	N/A	13.4149	10.5824	N/A	N/A	N/A	FMO5_HUMAN Dimethylaniline monooxygenase [N-oxide-forming] 5
P49327	FASN	7.53585	9.77503	4.97629	1.29714	0.660349	not certain	FAS_HUMAN Fatty acid synthase
P49336	CDK8	11.6987	N/A	N/A	N/A	N/A	N/A	CDK8_HUMAN Cyclin-dependent kinase 8
P49366	DHPS	9.90918	N/A	N/A	N/A	N/A	N/A	DHYS_HUMAN Deoxyhypusine synthase
P49368	CCT3	2.52182	4.06872	3.2634	1.61341	1.29407	not certain	TCPG_HUMAN T-complex protein 1 subunit gamma
P49407	ARRB1	11.8487	N/A	N/A	N/A	N/A	N/A	ARRB1_HUMAN Beta-arrestin-1
P49411	TUFM	20.5255	19.8553	49.0897	0.967345	2.39164	lysosome	EFTU_HUMAN Elongation factor Tu, mitochondrial
P49419	ALDH7A1	15.7749	28.8091	41.9073	1.82627	2.65659	lysosome	AL7A1_HUMAN Alpha-aminoadipic semialdehyde dehydrogenase
P49447	CYB561	N/A	N/A	9.68488	N/A	N/A	N/A	CY561_HUMAN Cytochrome b561
P49454	CENPF	4.82256	19.9066	9.55933	4.1278	1.98221	proteasome	CENPF_HUMAN Centromere protein F
P49458	SRP9	7.88384	14.4707	22.914	1.83549	2.90645	lysosome	SRP09_HUMAN Signal recognition particle 9 kDa protein
P49585	PCYT1A	15.4997	13.955	19.6526	0.900342	1.26793	not certain	PCY1A_HUMAN Choline-phosphate cytidylyltransferase A
P49588	AARS	10.153	27.4949	11.6086	2.70805	1.14336	proteasome	SYAC_HUMAN Alanine--tRNA ligase, cytoplasmic
P49589-3	CARS	9.57782	58.9912	25.2697	6.15915	2.63835	both	SYCC_HUMAN Isoform 3 of Cysteine--tRNA ligase, cytoplasmic
P49590	HARS2	N/A	50.2281	20.7778	N/A	N/A	N/A	SYHM_HUMAN Probable histidine--tRNA ligase, mitochondrial
P49591	SARS	5.83555	9.2965	4.6708	1.59308	0.800404	not certain	SYSC_HUMAN Serine--tRNA ligase, cytoplasmic
P49642	PRIM1	N/A	15.1144	6.34053	N/A	N/A	N/A	PRI1_HUMAN DNA primase small subunit
P49643	PRIM2	8.09941	23.2522	6.00647	2.87085	0.741594	proteasome	PRI2_HUMAN DNA primase large subunit
P49674	CSNK1E	N/A	N/A	6.68545	N/A	N/A	N/A	KC1E_HUMAN Casein kinase I isoform epsilon
P49711	CTCF	13.2154	N/A	25.3621	N/A	1.91914	N/A	CTCF_HUMAN Transcriptional repressor CTCF
P49720	PSMB3	4.15332	N/A	N/A	N/A	N/A	N/A	PSB3_HUMAN Proteasome subunit beta type-3
P49736	MCM2	11.4589	12.1074	12.1797	1.05659	1.06291	not certain	MCM2_HUMAN DNA replication licensing factor MCM2
P49748-3	ACADVL	6.95093	19.1689	14.9385	2.75774	2.14914	both	ACADV_HUMAN Isoform 3 of Very long-chain specific acyl-CoA dehydrogenase, mitochondrial
P49750-4	YLPM1	13.3683	40.8454	27.0972	3.05539	2.02697	both	YLPM1_HUMAN Isoform 4 of YLP motif-containing protein 1
P49753	ACOT2	11.6241	N/A	N/A	N/A	N/A	N/A	ACOT2_HUMAN Acyl-coenzyme A thioesterase 2, mitochondrial
P49755	TMED10	8.74634	11.423	7.34967	1.30603	0.840314	not certain	TMEDA_HUMAN Transmembrane emp24 domain-containing protein 10
P49756	RBM25	10.515	20.1204	30.0324	1.9135	2.85615	lysosome	RBM25_HUMAN RNA-binding protein 25
P49757	NUMB	8.92196	17.0056	10.6327	1.90604	1.19175	not certain	NUMB_HUMAN Protein numb homolog
P49770	EIF2B2	N/A	52.7108	7.84725	N/A	N/A	N/A	EI2BB_HUMAN Translation initiation factor eIF-2B subunit beta
P49773	HINT1	16.8772	89.5539	10.1963	5.3062	0.604148	proteasome	HINT1_HUMAN Histidine triad nucleotide-binding protein 1
P49790	NUP153	16.4487	38.8971	63.1857	2.36476	3.84139	both	NU153_HUMAN Nuclear pore complex protein Nup153
P49792	RANBP2	8.85698	20.2912	19.2541	2.29098	2.17389	both	RBP2_HUMAN E3 SUMO-protein ligase RanBP2
P49821	NDUFV1	5.5926	6.19656	7.08016	1.10799	1.26599	not certain	NDUV1_HUMAN NADH dehydrogenase [ubiquinone] flavoprotein 1, mitochondrial
P49840	GSK3A	14.3064	20.3209	20.2438	1.4204	1.41501	not certain	GSK3A_HUMAN Glycogen synthase kinase-3 alpha
P49841-2	GSK3B	N/A	N/A	9.23211	N/A	N/A	N/A	GSK3B_HUMAN Isoform 2 of Glycogen synthase kinase-3 beta
P49848-3	TAF6	1.61543	N/A	2.25465	N/A	1.3957	N/A	TAF6_HUMAN Isoform 3 of Transcription initiation factor TFIID subunit 6
P49902	NT5C2	8.68062	22.9064	7.66671	2.6388	0.883199	proteasome	5NTC_HUMAN Cytosolic purine 5'-nucleotidase
P49903	SEPHS1	19.0164	13.8713	>200	0.729438	10.5172	lysosome	SPS1_HUMAN Selenide, water dikinase 1
P49915	GMPS	17.4026	17.8923	54.5356	1.02814	3.13375	lysosome	GUAA_HUMAN GMP synthase [glutamine-hydrolyzing]
P49959	MRE11A	N/A	30.7655	N/A	N/A	N/A	N/A	MRE11_HUMAN Double-strand break repair protein MRE11A
P50148	GNAQ	19.7422	N/A	N/A	N/A	N/A	N/A	GNAQ_HUMAN Guanine nucleotide-binding protein G(q) subunit alpha
P50151	GNG10	N/A	35.0074	N/A	N/A	N/A	N/A	GBG10_HUMAN Guanine nucleotide-binding protein G(I)/G(S)/G(O) subunit gamma-10
P50213	IDH3A	12.3732	43.4848	34.8666	3.51443	2.81791	both	IDH3A_HUMAN Isocitrate dehydrogenase [NAD] subunit alpha, mitochondrial
P50219	MNX1	6.98174	22.2448	6.97472	3.18614	0.998994	proteasome	MNX1_HUMAN Motor neuron and pancreas homeobox protein 1
P50224-3	SULT1A3	N/A	15.0914	N/A	N/A	N/A	N/A	ST1A3_HUMAN Isoform 3 of Sulfotransferase 1A3/1A4
P50395	GDI2	12.2898	58.4441	28.5716	4.75548	2.32481	both	GDIB_HUMAN Rab GDP dissociation inhibitor beta
P50402	EMD	14.1922	N/A	20.3747	N/A	1.43563	N/A	EMD_HUMAN Emerin
P50416	CPT1A	14.0427	>200	22.3668	14.2423	1.59277	proteasome	CPT1A_HUMAN Carnitine O-palmitoyltransferase 1, liver isoform
P50454	SERPINH1	8.46954	34.3312	17.251	4.05349	2.03683	both	SERPH_HUMAN Serpin H1
P50461	CSRP3	10.5246	19.3023	9.21738	1.83403	0.875798	not certain	CSRP3_HUMAN Cysteine and glycine-rich protein 3
P50502	ST13	10.9814	11.8507	24.6672	1.07916	2.24626	lysosome	F10A1_HUMAN Hsc70-interacting protein
P50548	ERF	N/A	14.4828	N/A	N/A	N/A	N/A	ERF_HUMAN ETS domain-containing transcription factor ERF
P50552	VASP	12.0589	14.277	26.0386	1.18393	2.15928	lysosome	VASP_HUMAN Vasodilator-stimulated phosphoprotein
P50570-4	DNM2	10.2491	20.1966	11.8649	1.97057	1.15765	not certain	DYN2_HUMAN Isoform 4 of Dynamin-2
P50579	METAP2	N/A	>200	9.45244	N/A	N/A	N/A	MAP2_HUMAN Methionine aminopeptidase 2
P50750-2	CDK9	4.52919	5.1516	5.03741	1.13742	1.11221	not certain	CDK9_HUMAN Isoform 2 of Cyclin-dependent kinase 9
P50897	PPT1	2.94818	6.567	4.96275	2.22748	1.68332	proteasome	PPT1_HUMAN Palmitoyl-protein thioesterase 1
P50914	RPL14	N/A	N/A	5.93855	N/A	N/A	N/A	RL14_HUMAN 60S ribosomal protein L14
P50990	CCT8	8.82878	14.0798	13.783	1.59476	1.56115	not certain	TCPQ_HUMAN T-complex protein 1 subunit theta
P50991	CCT4	10.5905	19.8952	13.012	1.87859	1.22865	not certain	TCPD_HUMAN T-complex protein 1 subunit delta
P50995	ANXA11	12.6973	56.1253	18.1357	4.42024	1.42831	proteasome	ANX11_HUMAN Annexin A11
P51003	PAPOLA	N/A	15.8361	>200	N/A	N/A	N/A	PAPOA_HUMAN Poly(A) polymerase alpha
P51114	FXR1	10.6132	24.4583	15.0032	2.30452	1.41364	proteasome	FXR1_HUMAN Fragile X mental retardation syndrome-related protein 1
P51116	FXR2	9.446	N/A	17.1529	N/A	1.81589	N/A	FXR2_HUMAN Fragile X mental retardation syndrome-related protein 2
P51148-2	RAB5C	11.8285	26.3855	46.2098	2.23068	3.90667	both	RAB5C_HUMAN Isoform 2 of Ras-related protein Rab-5C
P51149	RAB7A	20.1262	11.1385	>200	0.553431	9.93728	lysosome	RAB7A_HUMAN Ras-related protein Rab-7a
P51153	RAB13	12.6904	12.5411	23.5764	0.98824	1.85782	not certain	RAB13_HUMAN Ras-related protein Rab-13
P51159	RAB27A	75.5886	N/A	>200	N/A	2.6459	N/A	RB27A_HUMAN Ras-related protein Rab-27A
P51160	PDE6C	10.4705	25.5774	N/A	2.4428	N/A	N/A	PDE6C_HUMAN Cone cGMP-specific 3',5'-cyclic phosphodiesterase subunit alpha'
P51398	DAP3	8.10604	9.62838	6.3685	1.1878	0.785649	not certain	RT29_HUMAN 28S ribosomal protein S29, mitochondrial
P51452	DUSP3	12.4109	N/A	N/A	N/A	N/A	N/A	DUS3_HUMAN Dual specificity protein phosphatase 3
P51532	SMARCA4	N/A	6.69061	7.62203	N/A	N/A	N/A	SMCA4_HUMAN Transcription activator BRG1
P51571	SSR4	N/A	N/A	7.83571	N/A	N/A	N/A	SSRD_HUMAN Translocon-associated protein subunit delta
P51572-2	BCAP31	24.1431	19.6081	33.1332	0.812164	1.37237	not certain	BAP31_HUMAN Isoform 2 of B-cell receptor-associated protein 31
P51610-4	HCFC1	22.3812	N/A	>200	N/A	8.93605	N/A	HCFC1_HUMAN Isoform 4 of Host cell factor 1
P51617	IRAK1	N/A	13.6796	N/A	N/A	N/A	N/A	IRAK1_HUMAN Interleukin-1 receptor-associated kinase 1
P51648-2	ALDH3A2	10.1337	65.5149	14.9321	6.46503	1.4735	proteasome	AL3A2_HUMAN Isoform 2 of Fatty aldehyde dehydrogenase
P51649-2	ALDH5A1	6.26093	6.76835	6.68996	1.08105	1.06853	not certain	SSDH_HUMAN Isoform 2 of Succinate-semialdehyde dehydrogenase, mitochondrial
P51659-2	HSD17B4	17.0936	>200	>200	11.7003	11.7003	both	DHB4_HUMAN Isoform 2 of Peroxisomal multifunctional enzyme type 2
P51665	PSMD7	6.92801	12.4622	15.2608	1.79881	2.20277	lysosome	PSMD7_HUMAN 26S proteasome non-ATPase regulatory subunit 7
P51668	UBE2D1	12.1519	167.023	N/A	13.7446	N/A	N/A	UB2D1_HUMAN Ubiquitin-conjugating enzyme E2 D1
P51784	USP11	4.60532	24.7111	N/A	5.36578	N/A	N/A	UBP11_HUMAN Ubiquitin carboxyl-terminal hydrolase 11
P51809	VAMP7	N/A	N/A	24.7023	N/A	N/A	N/A	VAMP7_HUMAN Vesicle-associated membrane protein 7
P51809-2	VAMP7	12.6787	58.1499	94.9517	4.58641	7.48904	both	VAMP7_HUMAN Isoform 2 of Vesicle-associated membrane protein 7
P51825-2	AFF1	7.44919	N/A	3.8693	N/A	0.519426	N/A	AFF1_HUMAN Isoform 2 of AF4/FMR2 family member 1
P51858-3	HDGF	11.7762	17.6733	10.5663	1.50076	0.897256	not certain	HDGF_HUMAN Isoform 3 of Hepatoma-derived growth factor
P51946	CCNH	N/A	35.5278	9.319	N/A	N/A	N/A	CCNH_HUMAN Cyclin-H
P51965	UBE2E1	9.21371	38.8971	11.9016	4.22166	1.29172	proteasome	UB2E1_HUMAN Ubiquitin-conjugating enzyme E2 E1
P51970	NDUFA8	6.11079	19.6917	5.83801	3.22244	0.955361	proteasome	NDUA8_HUMAN NADH dehydrogenase [ubiquinone] 1 alpha subcomplex subunit 8
P51991	HNRNPA3	13.5778	16.8731	17.6868	1.2427	1.30263	not certain	ROA3_HUMAN Heterogeneous nuclear ribonucleoprotein A3
P52209	PGD	10.6458	14.1257	14.5131	1.32688	1.36327	not certain	6PGD_HUMAN 6-phosphogluconate dehydrogenase, decarboxylating
P52272	HNRNPM	12.7698	28.6188	15.3317	2.24112	1.20062	proteasome	HNRPM_HUMAN Heterogeneous nuclear ribonucleoprotein M
P52272-2	HNRNPM	11.6241	23.8605	16.2064	2.05267	1.3942	proteasome	HNRPM_HUMAN Isoform 2 of Heterogeneous nuclear ribonucleoprotein M
P52292	KPNA2	5.31107	31.4495	5.14892	5.92151	0.96947	proteasome	IMA1_HUMAN Importin subunit alpha-1
P52294	KPNA1	12.2227	50.4841	9.61103	4.13037	0.786328	proteasome	IMA5_HUMAN Importin subunit alpha-5
P52298	NCBP2	N/A	N/A	22.7038	N/A	N/A	N/A	NCBP2_HUMAN Nuclear cap-binding protein subunit 2
P52306-5	RAP1GDS1	12.169	N/A	N/A	N/A	N/A	N/A	GDS1_HUMAN Isoform 5 of Rap1 GTPase-GDP dissociation stimulator 1
P52435	POLR2J	N/A	6.59952	2.63204	N/A	N/A	N/A	RPB11_HUMAN DNA-directed RNA polymerase II subunit RPB11-a
P52569-3	SLC7A2	6.90317	7.59697	6.39199	1.1005	0.92595	not certain	CTR2_HUMAN Isoform 3 of Low affinity cationic amino acid transporter 2
P52594-4	AGFG1	10.4927	>200	24.1515	19.0609	2.30174	both	AGFG1_HUMAN Isoform 4 of Arf-GAP domain and FG repeat-containing protein 1
P52597	HNRNPF	10.2994	28.0854	18.3275	2.7269	1.77948	proteasome	HNRPF_HUMAN Heterogeneous nuclear ribonucleoprotein F
P52701	MSH6	5.0754	6.7453	7.00644	1.32902	1.38047	not certain	MSH6_HUMAN DNA mismatch repair protein Msh6
P52735	VAV2	10.9814	146.234	15.4135	13.3165	1.4036	proteasome	VAV2_HUMAN Guanine nucleotide exchange factor VAV2
P52756	RBM5	11.0286	45.512	N/A	4.12672	N/A	N/A	RBM5_HUMAN RNA-binding protein 5
P52788	SMS	10.5454	53.9414	12.5457	5.11518	1.18968	proteasome	SPSY_HUMAN Spermine synthase
P52907	CAPZA1	13.3529	48.8476	25.1687	3.65821	1.88489	proteasome	CAZA1_HUMAN F-actin-capping protein subunit alpha-1
P52926-2	HMGA2	N/A	>200	N/A	N/A	N/A	N/A	HMGA2_HUMAN Isoform 2 of High mobility group protein HMGI-C
P52943	CRIP2	14.1286	N/A	>200	N/A	14.1557	N/A	CRIP2_HUMAN Cysteine-rich protein 2
P52943-2	CRIP2	20.9473	>200	103.92	9.54776	4.96102	both	CRIP2_HUMAN Isoform 2 of Cysteine-rich protein 2
P52948	NUP98	11.8003	39.836	14.9321	3.37586	1.2654	proteasome	NUP98_HUMAN Nuclear pore complex protein Nup98-Nup96
P53004	BLVRA	14.5131	26.8662	21.7356	1.85116	1.49765	not certain	BIEA_HUMAN Biliverdin reductase A
P53007	SLC25A1	14.143	12.6256	32.0753	0.892714	2.26793	lysosome	TXTP_HUMAN Tricarboxylate transport protein, mitochondrial
P53041	PPP5C	6.67386	18.628	9.46276	2.79119	1.41788	proteasome	PPP5_HUMAN Serine/threonine-protein phosphatase 5
P53350	PLK1	5.1348	18.1928	N/A	3.54304	N/A	N/A	PLK1_HUMAN Serine/threonine-protein kinase PLK1
P53355-3	DAPK1	2.88944	N/A	N/A	N/A	N/A	N/A	DAPK1_HUMAN Isoform 3 of Death-associated protein kinase 1
P53365	ARFIP2	13.3067	23.5204	16.4253	1.76756	1.23436	not certain	ARFP2_HUMAN Arfaptin-2
P53367	ARFIP1	15.2407	43.1867	N/A	2.83364	N/A	N/A	ARFP1_HUMAN Arfaptin-1
P53396	ACLY	4.08743	N/A	10.05	N/A	2.45875	N/A	ACLY_HUMAN ATP-citrate synthase
P53582	METAP1	17.5836	N/A	10.6164	N/A	0.603768	N/A	MAP11_HUMAN Methionine aminopeptidase 1
P53597	SUCLG1	12.4757	19.6917	19.8269	1.57841	1.58924	not certain	SUCA_HUMAN Succinyl-CoA ligase [ADP/GDP-forming] subunit alpha, mitochondrial
P53602	MVD	N/A	34.4678	N/A	N/A	N/A	N/A	MVD1_HUMAN Diphosphomevalonate decarboxylase
P53618	COPB1	9.13598	124.891	52.1163	13.6703	5.70451	both	COPB_HUMAN Coatomer subunit beta
P53621-2	COPA	11.7722	>200	14.5162	16.9892	1.23309	proteasome	COPA_HUMAN Isoform 2 of Coatomer subunit alpha
P53701	HCCS	15.1707	10.2234	N/A	0.673894	N/A	N/A	CCHL_HUMAN Cytochrome c-type heme lyase
P53779	MAPK10	8.25568	N/A	N/A	N/A	N/A	N/A	MK10_HUMAN Mitogen-activated protein kinase 10
P53801	PTTG1IP	5.36243	5.76566	7.42923	1.0752	1.38542	not certain	PTTG_HUMAN Pituitary tumor-transforming gene 1 protein-interacting protein
P53804	TTC3	N/A	26.6903	28.4193	N/A	N/A	N/A	TTC3_HUMAN E3 ubiquitin-protein ligase TTC3
P53814-6	SMTN	N/A	N/A	9.52911	N/A	N/A	N/A	SMTN_HUMAN Isoform B3 of Smoothelin
P53816	PLA2G16	N/A	19.4268	N/A	N/A	N/A	N/A	HRSL3_HUMAN HRAS-like suppressor 3
P53985	SLC16A1	15.2642	18.9955	34.0948	1.24445	2.23364	lysosome	MOT1_HUMAN Monocarboxylate transporter 1
P53990-5	IST1	12.4622	35.6374	10.9658	2.85964	0.879924	proteasome	IST1_HUMAN Isoform 5 of IST1 homolog
P53999	SUB1	7.82863	16.7548	41.2833	2.1402	5.27338	both	TCP4_HUMAN Activated RNA polymerase II transcriptional coactivator p15
P54132	BLM	N/A	N/A	3.71681	N/A	N/A	N/A	BLM_HUMAN Bloom syndrome protein
P54136	RARS	12.3688	47.639	29.9804	3.85155	2.42388	both	SYRC_HUMAN Arginine--tRNA ligase, cytoplasmic
P54577	YARS	11.2946	29.3831	18.4495	2.60153	1.63348	proteasome	SYYC_HUMAN Tyrosine--tRNA ligase, cytoplasmic
P54578	USP14	11.5737	23.5684	23.7379	2.03638	2.05103	both	UBP14_HUMAN Ubiquitin carboxyl-terminal hydrolase 14
P54619-3	PRKAG1	N/A	27.1184	N/A	N/A	N/A	N/A	AAKG1_HUMAN Isoform 3 of 5'-AMP-activated protein kinase subunit gamma-1
P54709	ATP1B3	4.35914	8.43553	5.42454	1.93513	1.2444	not certain	AT1B3_HUMAN Sodium/potassium-transporting ATPase subunit beta-3
P54727	RAD23B	N/A	N/A	18.5731	N/A	N/A	N/A	RD23B_HUMAN UV excision repair protein RAD23 homolog B
P54764	EPHA4	N/A	19.0373	N/A	N/A	N/A	N/A	EPHA4_HUMAN Ephrin type-A receptor 4
P54819	AK2	11.0093	>200	18.7896	18.1664	1.7067	proteasome	KAD2_HUMAN Adenylate kinase 2, mitochondrial
P54886	ALDH18A1	11.9839	28.3844	>200	2.36855	16.6891	both	P5CS_HUMAN Delta-1-pyrroline-5-carboxylate synthase
P54920	NAPA	11.2615	21.2426	10.4895	1.8863	0.931447	not certain	SNAA_HUMAN Alpha-soluble NSF attachment protein
P55010	EIF5	13.0906	24.8529	11.3463	1.89853	0.866754	not certain	IF5_HUMAN Eukaryotic translation initiation factor 5
P55011	SLC12A2	6.00908	8.62552	10.8934	1.43542	1.81282	not certain	S12A2_HUMAN Solute carrier family 12 member 2
P55036	PSMD4	N/A	12.1669	N/A	N/A	N/A	N/A	PSMD4_HUMAN 26S proteasome non-ATPase regulatory subunit 4
P55039	DRG2	8.48925	32.4355	7.92984	3.82078	0.934104	proteasome	DRG2_HUMAN Developmentally-regulated GTP-binding protein 2
P55060	CSE1L	7.33024	15.8072	11.0251	2.15644	1.50406	proteasome	XPO2_HUMAN Exportin-2
P55061	TMBIM6	1.67415	N/A	2.67243	N/A	1.59629	N/A	BI1_HUMAN Bax inhibitor 1
P55072	VCP	47.4109	>200	>200	4.21844	4.21844	both	TERA_HUMAN Transitional endoplasmic reticulum ATPase
P55081	MFAP1	7.57124	16.9806	9.61369	2.24277	1.26976	proteasome	MFAP1_HUMAN Microfibrillar-associated protein 1
P55084	HADHB	11.278	21.3342	11.4665	1.89166	1.01671	not certain	ECHB_HUMAN Trifunctional enzyme subunit beta, mitochondrial
P55145	MANF	14.7384	N/A	98.8798	N/A	6.70899	N/A	MANF_HUMAN Mesencephalic astrocyte-derived neurotrophic factor
P55196-5	MLLT4	N/A	13.5698	N/A	N/A	N/A	N/A	AFAD_HUMAN Isoform 5 of Afadin
P55199	ELL	8.90019	41.6555	15.2474	4.68029	1.71315	proteasome	ELL_HUMAN RNA polymerase II elongation factor ELL
P55201-2	BRPF1	6.60077	N/A	N/A	N/A	N/A	N/A	BRPF1_HUMAN Isoform 2 of Peregrin
P55209	NAP1L1	5.26068	>200	9.80545	38.0179	1.86391	proteasome	NP1L1_HUMAN Nucleosome assembly protein 1-like 1
P55263	ADK	12.879	38.637	28.1653	3	2.18692	both	ADK_HUMAN Adenosine kinase
P55265-4	ADAR	9.93759	12.5912	12.1158	1.26703	1.21919	not certain	DSRAD_HUMAN Isoform 4 of Double-stranded RNA-specific adenosine deaminase
P55317	FOXA1	3.82933	10.6753	N/A	2.78777	N/A	N/A	FOXA1_HUMAN Hepatocyte nuclear factor 3-alpha
P55735	SEC13	N/A	59.1423	N/A	N/A	N/A	N/A	SEC13_HUMAN Protein SEC13 homolog
P55769	NHP2L1	4.88063	7.05853	7.00715	1.44623	1.43571	not certain	NH2L1_HUMAN NHP2-like protein 1
P55786	NPEPPS	11.5698	N/A	14.9611	N/A	1.29311	N/A	PSA_HUMAN Puromycin-sensitive aminopeptidase
P55795	HNRNPH2	11.2378	13.7912	28.0854	1.22722	2.49919	lysosome	HNRH2_HUMAN Heterogeneous nuclear ribonucleoprotein H2
P55854	SUMO3	12.0401	12.1733	18.3567	1.01106	1.52463	not certain	SUMO3_HUMAN Small ubiquitin-related modifier 3
P55884-2	EIF3B	10.7465	45.9952	27.3539	4.28003	2.54538	both	EIF3B_HUMAN Isoform 2 of Eukaryotic translation initiation factor 3 subunit B
P56159	GFRA1	4.53987	5.11774	4.93343	1.12729	1.08669	not certain	GFRA1_HUMAN GDNF family receptor alpha-1
P56181	NDUFV3	5.57327	N/A	5.80477	N/A	1.04154	N/A	NDUV3_HUMAN NADH dehydrogenase [ubiquinone] flavoprotein 3, mitochondrial
P56181-2	NDUFV3	14.0741	28.9173	15.7784	2.05465	1.1211	proteasome	NDUV3_HUMAN Isoform 2 of NADH dehydrogenase [ubiquinone] flavoprotein 3, mitochondrial
P56182	RRP1	4.4803	9.74616	4.46875	2.17534	0.997421	proteasome	RRP1_HUMAN Ribosomal RNA processing protein 1 homolog A
P56192	MARS	14.6978	18.1073	87.0788	1.23197	5.92462	lysosome	SYMC_HUMAN Methionine--tRNA ligase, cytoplasmic
P56211	ARPP19	8.44683	28.8211	17.934	3.41206	2.12316	both	ARP19_HUMAN cAMP-regulated phosphoprotein 19
P56270-2	MAZ	10.5695	25.3436	7.36294	2.39781	0.696622	proteasome	MAZ_HUMAN Isoform 2 of Myc-associated zinc finger protein
P56282	POLE2	N/A	27.2785	N/A	N/A	N/A	N/A	DPOE2_HUMAN DNA polymerase epsilon subunit 2
P56378	MP68	4.48988	N/A	4.29167	N/A	0.955854	N/A	68MP_HUMAN 6.8 kDa mitochondrial proteolipid
P56378-2	MP68	N/A	5.85082	N/A	N/A	N/A	N/A	68MP_HUMAN Isoform 2 of 6.8 kDa mitochondrial proteolipid
P56381	ATP5E	N/A	5.0407	N/A	N/A	N/A	N/A	ATP5E_HUMAN ATP synthase subunit epsilon, mitochondrial
P56385	ATP5I	N/A	11.2287	N/A	N/A	N/A	N/A	ATP5I_HUMAN ATP synthase subunit e, mitochondrial
P56545-2	CTBP2	8.4079	35.3106	47.1529	4.19969	5.60816	both	CTBP2_HUMAN Isoform 2 of C-terminal-binding protein 2
P56556	NDUFA6	4.66295	6.94884	5.0821	1.49023	1.08989	not certain	NDUA6_HUMAN NADH dehydrogenase [ubiquinone] 1 alpha subcomplex subunit 6
P56589	PEX3	6.66937	11.1528	N/A	1.67224	N/A	N/A	PEX3_HUMAN Peroxisomal biogenesis factor 3
P56715	RP1	N/A	98.3187	N/A	N/A	N/A	N/A	RP1_HUMAN Oxygen-regulated protein 1
P56937	HSD17B7	N/A	19.7309	N/A	N/A	N/A	N/A	DHB7_HUMAN 3-keto-steroid reductase
P56945-6	BCAR1	N/A	18.9229	11.7642	N/A	N/A	N/A	BCAR1_HUMAN Isoform 6 of Breast cancer anti-estrogen resistance protein 1
P56962	STX17	10.6213	17.2596	N/A	1.625	N/A	N/A	STX17_HUMAN Syntaxin-17
P57076	C21orf59	4.57493	38.7883	N/A	8.47846	N/A	N/A	CU059_HUMAN UPF0769 protein C21orf59
P57088	TMEM33	11.0146	N/A	22.5928	N/A	2.05117	N/A	TMM33_HUMAN Transmembrane protein 33
P57105	SYNJ2BP	19.0373	55.0117	N/A	2.88968	N/A	N/A	SYJ2B_HUMAN Synaptojanin-2-binding protein
P57721	PCBP3	10.5776	N/A	N/A	N/A	N/A	N/A	PCBP3_HUMAN Poly(rC)-binding protein 3
P57723	PCBP4	9.77916	20.7033	20.7157	2.11708	2.11835	both	PCBP4_HUMAN Poly(rC)-binding protein 4
P57735	RAB25	N/A	N/A	>200	N/A	N/A	N/A	RAB25_HUMAN Ras-related protein Rab-25
P57737-3	CORO7	10.7232	13.546	10.5727	1.26324	0.985967	not certain	CORO7_HUMAN Isoform 3 of Coronin-7
P57740	NUP107	N/A	8.35822	N/A	N/A	N/A	N/A	NU107_HUMAN Nuclear pore complex protein Nup107
P57772	EEFSEC	2.8015	>200	40.02	71.3903	14.2852	both	SELB_HUMAN Selenocysteine-specific elongation factor
P58107	EPPK1	12.338	8.45714	41.6305	0.685456	3.37417	lysosome	EPIPL_HUMAN Epiplakin
P58546	MTPN	14.2126	>200	10.2826	14.072	0.723483	proteasome	MTPN_HUMAN Myotrophin
P59998-2	ARPC4	3.87688	11.7502	5.90465	3.03085	1.52304	proteasome	ARPC4_HUMAN Isoform 2 of Actin-related protein 2/3 complex subunit 4
P60033	CD81	8.21362	N/A	8.49133	N/A	1.03381	N/A	CD81_HUMAN CD81 antigen
P60059	SEC61G	5.58224	16.5232	7.49348	2.95995	1.34238	proteasome	SC61G_HUMAN Protein transport protein Sec61 subunit gamma
P60174	TPI1	26.7728	175.48	13.1005	6.55443	0.489321	proteasome	TPIS_HUMAN Triosephosphate isomerase
P60228	EIF3E	4.76914	16.5035	5.21359	3.46048	1.09319	proteasome	EIF3E_HUMAN Eukaryotic translation initiation factor 3 subunit E
P60468	SEC61B	6.87782	13.223	5.72612	1.92255	0.832549	not certain	SC61B_HUMAN Protein transport protein Sec61 subunit beta
P60520	GABARAPL2	8.12885	15.0521	19.1424	1.85168	2.35487	lysosome	GBRL2_HUMAN Gamma-aminobutyric acid receptor-associated protein-like 2
P60604	UBE2G2	N/A	8.70679	N/A	N/A	N/A	N/A	UB2G2_HUMAN Ubiquitin-conjugating enzyme E2 G2
P60660-2	MYL6	6.5262	10.1263	2.80547	1.55164	0.429878	not certain	MYL6_HUMAN Isoform Smooth muscle of Myosin light polypeptide 6
P60709	ACTB	14.9289	24.2359	15.3351	1.62343	1.02721	not certain	ACTB_HUMAN Actin, cytoplasmic 1
P60842	EIF4A1	6.27794	28.4777	8.28826	4.53615	1.32022	proteasome	IF4A1_HUMAN Eukaryotic initiation factor 4A-I
P60866-2	RPS20	5.35621	11.8669	4.6664	2.21555	0.871213	proteasome	RS20_HUMAN Isoform 2 of 40S ribosomal protein S20
P60891	PRPS1	16.8896	N/A	N/A	N/A	N/A	N/A	PRPS1_HUMAN Ribose-phosphate pyrophosphokinase 1
P60900	PSMA6	2.2185	3.71024	2.7882	1.67241	1.2568	not certain	PSA6_HUMAN Proteasome subunit alpha type-6
P60903	S100A10	2.99002	5.11774	7.34266	1.71161	2.45572	lysosome	S10AA_HUMAN Protein S100-A10
P60953	CDC42	20.9663	>200	14.9708	9.5391	0.714039	proteasome	CDC42_HUMAN Cell division control protein 42 homolog
P60953-1	CDC42	13.7175	51.6888	79.4894	3.76808	5.79472	both	CDC42_HUMAN Isoform 1 of Cell division control protein 42 homolog
P60981	DSTN	13.5275	31.7957	10.1116	2.35046	0.747484	proteasome	DEST_HUMAN Destrin
P60983	GMFB	12.2227	>200	N/A	16.363	N/A	N/A	GMFB_HUMAN Glia maturation factor beta
P61006	RAB8A	16.48	14.2447	>200	0.864365	12.136	lysosome	RAB8A_HUMAN Ras-related protein Rab-8A
P61009	SPCS3	15.2777	25.758	>200	1.68599	13.091	lysosome	SPCS3_HUMAN Signal peptidase complex subunit 3
P61011	SRP54	5.58404	20.9284	9.08688	3.74789	1.62729	proteasome	SRP54_HUMAN Signal recognition particle 54 kDa protein
P61018-2	RAB4B	N/A	N/A	>200	N/A	N/A	N/A	RAB4B_HUMAN Isoform 2 of Ras-related protein Rab-4B
P61019	RAB2A	N/A	14.0171	>200	N/A	N/A	N/A	RAB2A_HUMAN Ras-related protein Rab-2A
P61020	RAB5B	N/A	N/A	46.4887	N/A	N/A	N/A	RAB5B_HUMAN Ras-related protein Rab-5B
P61026	RAB10	13.1677	12.5981	>200	0.956743	15.1887	lysosome	RAB10_HUMAN Ras-related protein Rab-10
P61077-3	UBE2D3	11.3705	21.6203	N/A	1.90143	N/A	N/A	UB2D3_HUMAN Isoform 3 of Ubiquitin-conjugating enzyme E2 D3
P61081	UBE2M	16.4331	54.6646	10.8866	3.3265	0.662478	proteasome	UBC12_HUMAN NEDD8-conjugating enzyme Ubc12
P61086	UBE2K	19.8666	>200	18.8458	10.0671	0.948613	proteasome	UBE2K_HUMAN Ubiquitin-conjugating enzyme E2 K
P61088	UBE2N	12.3578	N/A	8.34916	N/A	0.67562	N/A	UBE2N_HUMAN Ubiquitin-conjugating enzyme E2 N
P61106	RAB14	34.0111	11.9282	>200	0.350714	5.88042	lysosome	RAB14_HUMAN Ras-related protein Rab-14
P61158	ACTR3	11.9632	18.4544	17.1401	1.5426	1.43274	not certain	ARP3_HUMAN Actin-related protein 3
P61160-2	ACTR2	12.7746	42.6815	15.9381	3.34113	1.24764	proteasome	ARP2_HUMAN Isoform 2 of Actin-related protein 2
P61163	ACTR1A	4.76914	13.0832	6.7211	2.7433	1.40929	proteasome	ACTZ_HUMAN Alpha-centractin
P61165	TMEM258	N/A	21.4398	N/A	N/A	N/A	N/A	TM258_HUMAN Transmembrane protein 258
P61201-2	COPS2	8.61909	N/A	N/A	N/A	N/A	N/A	CSN2_HUMAN Isoform 2 of COP9 signalosome complex subunit 2
P61204	ARF3	32.2544	N/A	17.6868	N/A	0.548354	N/A	ARF3_HUMAN ADP-ribosylation factor 3
P61221	ABCE1	17.6553	95.871	N/A	5.43015	N/A	N/A	ABCE1_HUMAN ATP-binding cassette sub-family E member 1
P61225	RAP2B	14.2506	23.0972	50.6316	1.62079	3.55296	lysosome	RAP2B_HUMAN Ras-related protein Rap-2b
P61247	RPS3A	3.17724	5.82036	4.19962	1.83189	1.32178	not certain	RS3A_HUMAN 40S ribosomal protein S3a
P61254	RPL26	2.46338	3.97082	3.57606	1.61194	1.45168	not certain	RL26_HUMAN 60S ribosomal protein L26
P61289-2	PSME3	14.5558	14.342	47.639	0.985309	3.27285	lysosome	PSME3_HUMAN Isoform 2 of Proteasome activator complex subunit 3
P61313	RPL15	1.22674	N/A	0.974192	N/A	0.794128	N/A	RL15_HUMAN 60S ribosomal protein L15
P61353	RPL27	3.04012	5.93143	3.98635	1.95105	1.31125	not certain	RL27_HUMAN 60S ribosomal protein L27
P61421	ATP6V0D1	4.47885	N/A	7.02989	N/A	1.56957	N/A	VA0D1_HUMAN V-type proton ATPase subunit d 1
P61513	RPL37A	N/A	18.1738	8.26159	N/A	N/A	N/A	RL37A_HUMAN 60S ribosomal protein L37a
P61586	RHOA	11.9467	N/A	N/A	N/A	N/A	N/A	RHOA_HUMAN Transforming protein RhoA
P61587	RND3	2.80241	8.76181	6.98104	3.12653	2.49109	both	RND3_HUMAN Rho-related GTP-binding protein RhoE
P61604	HSPE1	15.121	>200	45.7825	13.2266	3.02774	both	CH10_HUMAN 10 kDa heat shock protein, mitochondrial
P61619	SEC61A1	10.3409	14.565	17.1063	1.40849	1.65424	not certain	S61A1_HUMAN Protein transport protein Sec61 subunit alpha isoform 1
P61758	VBP1	8.66001	>200	14.2858	23.0947	1.64963	proteasome	PFD3_HUMAN Prefoldin subunit 3
P61769	B2M	N/A	4.55359	12.3622	N/A	N/A	N/A	B2MG_HUMAN Beta-2-microglobulin
P61923	COPZ1	8.08523	15.5693	7.86773	1.92565	0.973099	not certain	COPZ1_HUMAN Coatomer subunit zeta-1
P61927	RPL37	3.37495	9.2642	6.27112	2.74499	1.85814	proteasome	RL37_HUMAN 60S ribosomal protein L37
P61956	SUMO2	8.65244	9.78745	15.3998	1.13118	1.77983	not certain	SUMO2_HUMAN Small ubiquitin-related modifier 2
P61960	UFM1	10.7531	N/A	N/A	N/A	N/A	N/A	UFM1_HUMAN Ubiquitin-fold modifier 1
P61962	DCAF7	4.71368	8.7729	N/A	1.86116	N/A	N/A	DCAF7_HUMAN DDB1- and CUL4-associated factor 7
P61970	NUTF2	N/A	>200	12.402	N/A	N/A	N/A	NTF2_HUMAN Nuclear transport factor 2
P61978-2	HNRNPK	16.8362	38.4228	15.8833	2.28215	0.943401	proteasome	HNRPK_HUMAN Isoform 2 of Heterogeneous nuclear ribonucleoprotein K
P61978-3	HNRNPK	8.32109	N/A	23.6086	N/A	2.83719	N/A	HNRPK_HUMAN Isoform 3 of Heterogeneous nuclear ribonucleoprotein K
P61981	YWHAG	12.6371	17.934	51.8047	1.41915	4.0994	lysosome	1433G_HUMAN 14-3-3 protein gamma
P62070	RRAS2	N/A	N/A	>200	N/A	N/A	N/A	RRAS2_HUMAN Ras-related protein R-Ras2
P62072	TIMM10	5.47726	15.7426	5.36118	2.87418	0.978807	proteasome	TIM10_HUMAN Mitochondrial import inner membrane translocase subunit Tim10
P62081	RPS7	4.57251	6.27964	2.92147	1.37335	0.638919	not certain	RS7_HUMAN 40S ribosomal protein S7
P62136-2	PPP1CA	10.3578	19.3725	15.224	1.87032	1.4698	not certain	PP1A_HUMAN Isoform 2 of Serine/threonine-protein phosphatase PP1-alpha catalytic subunit
P62140	PPP1CB	N/A	N/A	15.8579	N/A	N/A	N/A	PP1B_HUMAN Serine/threonine-protein phosphatase PP1-beta catalytic subunit
P62158	CALM1	N/A	12.4109	8.52475	N/A	N/A	N/A	CALM_HUMAN Calmodulin
P62191	PSMC1	4.30687	13.5778	3.39828	3.1526	0.789038	proteasome	PRS4_HUMAN 26S protease regulatory subunit 4
P62195	PSMC5	2.95736	16.0711	2.88187	5.43427	0.974472	proteasome	PRS8_HUMAN 26S protease regulatory subunit 8
P62241	RPS8	5.80477	16.9267	N/A	2.916	N/A	N/A	RS8_HUMAN 40S ribosomal protein S8
P62244	RPS15A	5.1185	8.85585	4.11705	1.73016	0.804348	not certain	RS15A_HUMAN 40S ribosomal protein S15a
P62249	RPS16	16.0154	22.4829	11.4816	1.40383	0.716912	not certain	RS16_HUMAN 40S ribosomal protein S16
P62256	UBE2H	8.98092	>200	6.30478	22.2694	0.702019	proteasome	UBE2H_HUMAN Ubiquitin-conjugating enzyme E2 H
P62258	YWHAE	7.93619	10.7967	44.3189	1.36044	5.5844	lysosome	1433E_HUMAN 14-3-3 protein epsilon
P62263	RPS14	4.22599	21.1648	4.96773	5.00824	1.17552	proteasome	RS14_HUMAN 40S ribosomal protein S14
P62266	RPS23	6.8642	N/A	6.7929	N/A	0.989612	N/A	RS23_HUMAN 40S ribosomal protein S23
P62269	RPS18	7.7908	14.568	7.64641	1.8699	0.981467	not certain	RS18_HUMAN 40S ribosomal protein S18
P62273	RPS29	N/A	69.663	N/A	N/A	N/A	N/A	RS29_HUMAN 40S ribosomal protein S29
P62273-2	RPS29	12.7981	N/A	19.3562	N/A	1.51243	N/A	RS29_HUMAN Isoform 2 of 40S ribosomal protein S29
P62277	RPS13	9.89786	14.2242	6.27339	1.4371	0.633813	not certain	RS13_HUMAN 40S ribosomal protein S13
P62280	RPS11	4.96737	11.7842	5.71715	2.37232	1.15094	proteasome	RS11_HUMAN 40S ribosomal protein S11
P62304	SNRPE	N/A	13.5858	3.23462	N/A	N/A	N/A	RUXE_HUMAN Small nuclear ribonucleoprotein E
P62306	SNRPF	N/A	20.2734	6.51087	N/A	N/A	N/A	RUXF_HUMAN Small nuclear ribonucleoprotein F
P62312	LSM6	N/A	>200	10.4579	N/A	N/A	N/A	LSM6_HUMAN U6 snRNA-associated Sm-like protein LSm6
P62314	SNRPD1	14.9967	>200	N/A	13.3363	N/A	N/A	SMD1_HUMAN Small nuclear ribonucleoprotein Sm D1
P62316	SNRPD2	7.91535	10.034	4.84515	1.26766	0.612121	not certain	SMD2_HUMAN Small nuclear ribonucleoprotein Sm D2
P62318	SNRPD3	4.90619	9.299	10.5663	1.89536	2.15366	lysosome	SMD3_HUMAN Small nuclear ribonucleoprotein Sm D3
P62330	ARF6	9.41648	N/A	11.8507	N/A	1.25851	N/A	ARF6_HUMAN ADP-ribosylation factor 6
P62333	PSMC6	4.62499	14.2213	5.58629	3.07489	1.20785	proteasome	PRS10_HUMAN 26S protease regulatory subunit 10B
P62341	SELT	13.9607	N/A	19.1371	N/A	1.37079	N/A	SELT_HUMAN Selenoprotein T
P62424	RPL7A	2.80116	5.04694	2.26904	1.80173	0.810037	not certain	RL7A_HUMAN 60S ribosomal protein L7a
P62487	POLR2G	6.44968	>200	12.2356	31.0093	1.89709	proteasome	RPB7_HUMAN DNA-directed RNA polymerase II subunit RPB7
P62495	ETF1	13.2584	26.5066	42.8398	1.99924	3.23115	lysosome	ERF1_HUMAN Eukaryotic peptide chain release factor subunit 1
P62701	RPS4X	5.08695	10.7749	7.18362	2.11814	1.41217	proteasome	RS4X_HUMAN 40S ribosomal protein S4, X isoform
P62714	PPP2CB	8.69586	32.588	N/A	3.74753	N/A	N/A	PP2AB_HUMAN Serine/threonine-protein phosphatase 2A catalytic subunit beta isoform
P62736	ACTA2	13.1852	20.6294	10.7498	1.56458	0.815292	not certain	ACTA_HUMAN Actin, aortic smooth muscle
P62745	RHOB	5.30944	16.0599	6.2367	3.02479	1.17464	proteasome	RHOB_HUMAN Rho-related GTP-binding protein RhoB
P62750	RPL23A	4.90932	7.30474	5.24555	1.48793	1.06849	not certain	RL23A_HUMAN 60S ribosomal protein L23a
P62753	RPS6	6.31454	15.524	5.28555	2.45845	0.837044	proteasome	RS6_HUMAN 40S ribosomal protein S6
P62805	HIST1H4A	19.776	3.0998	2.95421	0.156746	0.149384	other	H4_HUMAN Histone H4
P62820	RAB1A	15.3487	9.00308	38.2954	0.58657	2.49503	lysosome	RAB1A_HUMAN Ras-related protein Rab-1A
P62826	RAN	12.1776	50.78	29.6597	4.16996	2.4356	both	RAN_HUMAN GTP-binding nuclear protein Ran
P62829	RPL23	7.96996	32.3749	8.93346	4.06212	1.12089	proteasome	RL23_HUMAN 60S ribosomal protein L23
P62834	RAP1A	19.3131	15.7034	>200	0.813095	10.3557	lysosome	RAP1A_HUMAN Ras-related protein Rap-1A
P62841	RPS15	6.33821	22.0818	5.8906	3.48391	0.929379	proteasome	RS15_HUMAN 40S ribosomal protein S15
P62847-4	RPS24	6.6368	14.565	5.3131	2.19458	0.800552	proteasome	RS24_HUMAN Isoform 4 of 40S ribosomal protein S24
P62851	RPS25	2.51013	4.85329	4.06991	1.93348	1.6214	not certain	RS25_HUMAN 40S ribosomal protein S25
P62861	FAU	N/A	13.0193	N/A	N/A	N/A	N/A	RS30_HUMAN 40S ribosomal protein S30
P62873	GNB1	N/A	N/A	55.6298	N/A	N/A	N/A	GBB1_HUMAN Guanine nucleotide-binding protein G(I)/G(S)/G(T) subunit beta-1
P62875	POLR2L	N/A	N/A	4.87582	N/A	N/A	N/A	RPAB5_HUMAN DNA-directed RNA polymerases I, II, and III subunit RPABC5
P62879	GNB2	N/A	N/A	14.4105	N/A	N/A	N/A	GBB2_HUMAN Guanine nucleotide-binding protein G(I)/G(S)/G(T) subunit beta-2
P62888	RPL30	2.21892	7.09974	2.30151	3.19963	1.03722	proteasome	RL30_HUMAN 60S ribosomal protein L30
P62891	RPL39	6.23839	N/A	N/A	N/A	N/A	N/A	RL39_HUMAN 60S ribosomal protein L39
P62899-2	RPL31	N/A	13.8353	1.41748	N/A	N/A	N/A	RL31_HUMAN Isoform 2 of 60S ribosomal protein L31
P62906	RPL10A	5.16311	10.8695	4.7639	2.10522	0.92268	proteasome	RL10A_HUMAN 60S ribosomal protein L10a
P62910	RPL32	2.75825	7.05134	2.9423	2.55646	1.06673	proteasome	RL32_HUMAN 60S ribosomal protein L32
P62913	RPL11	5.39918	8.3311	9.37445	1.54303	1.73627	not certain	RL11_HUMAN 60S ribosomal protein L11
P62917	RPL8	2.45449	6.56514	N/A	2.67475	N/A	N/A	RL8_HUMAN 60S ribosomal protein L8
P62937	PPIA	9.14684	32.4052	10.7866	3.54278	1.17927	proteasome	PPIA_HUMAN Peptidyl-prolyl cis-trans isomerase A
P62979	RPS27A	5.18396	12.4532	N/A	2.40226	N/A	N/A	RS27A_HUMAN Ubiquitin-40S ribosomal protein S27a
P62987	UBA52	N/A	N/A	5.81695	N/A	N/A	N/A	RL40_HUMAN Ubiquitin-60S ribosomal protein L40
P62993	GRB2	9.01596	17.3939	7.57207	1.92923	0.839851	not certain	GRB2_HUMAN Growth factor receptor-bound protein 2
P63000-2	RAC1	10.6951	82.9123	30.7519	7.75239	2.87533	both	RAC1_HUMAN Isoform B of Ras-related C3 botulinum toxin substrate 1
P63010-2	AP2B1	10.563	38.5082	15.417	3.64556	1.45952	proteasome	AP2B1_HUMAN Isoform 2 of AP-2 complex subunit beta
P63092-4	GNAS	5.60799	6.62728	24.2869	1.18176	4.33076	lysosome	GNAS2_HUMAN Isoform 4 of Guanine nucleotide-binding protein G(s) subunit alpha isoforms short
P63098	PPP3R1	N/A	17.9015	N/A	N/A	N/A	N/A	CANB1_HUMAN Calcineurin subunit B type 1
P63104	YWHAZ	15.9564	>200	25.6626	12.5341	1.60829	proteasome	1433Z_HUMAN 14-3-3 protein zeta/delta
P63151-2	PPP2R2A	N/A	23.7217	N/A	N/A	N/A	N/A	2ABA_HUMAN Isoform 2 of Serine/threonine-protein phosphatase 2A 55 kDa regulatory subunit B alpha isoform
P63165	SUMO1	5.58	13.6098	9.30274	2.43903	1.66716	proteasome	SUMO1_HUMAN Small ubiquitin-related modifier 1
P63167	DYNLL1	N/A	9.32276	N/A	N/A	N/A	N/A	DYL1_HUMAN Dynein light chain 1, cytoplasmic
P63172	DYNLT1	N/A	N/A	25.2881	N/A	N/A	N/A	DYLT1_HUMAN Dynein light chain Tctex-type 1
P63208	SKP1	N/A	10.461	10.7799	N/A	N/A	N/A	SKP1_HUMAN S-phase kinase-associated protein 1
P63218	GNG5	10.5663	23.3147	12.6418	2.20653	1.19643	proteasome	GBG5_HUMAN Guanine nucleotide-binding protein G(I)/G(S)/G(O) subunit gamma-5
P63220	RPS21	2.58792	8.07581	4.23736	3.12059	1.63736	proteasome	RS21_HUMAN 40S ribosomal protein S21
P63241-2	EIF5A	12.4824	20.3329	7.83217	1.62892	0.627458	not certain	IF5A1_HUMAN Isoform 2 of Eukaryotic translation initiation factor 5A-1
P63244	GNB2L1	7.40463	17.5703	11.516	2.37288	1.55524	proteasome	GBLP_HUMAN Guanine nucleotide-binding protein subunit beta-2-like 1
P63272	SUPT4H1	N/A	8.68605	N/A	N/A	N/A	N/A	SPT4H_HUMAN Transcription elongation factor SPT4
P63279	UBE2I	12.5821	19.5308	9.75989	1.55227	0.775697	not certain	UBC9_HUMAN SUMO-conjugating enzyme UBC9
P63313	TMSB10	6.43411	N/A	N/A	N/A	N/A	N/A	TYB10_HUMAN Thymosin beta-10
P67775	PPP2CA	7.77245	20.9663	14.1286	2.69752	1.81777	proteasome	PP2AA_HUMAN Serine/threonine-protein phosphatase 2A catalytic subunit alpha isoform
P67809	YBX1	9.6324	>200	16.8158	20.7633	1.74575	proteasome	YBOX1_HUMAN Nuclease-sensitive element-binding protein 1
P67812	SEC11A	5.57506	10.24	10.6918	1.83676	1.91778	not certain	SC11A_HUMAN Signal peptidase complex catalytic subunit SEC11A
P67870	CSNK2B	5.25789	N/A	6.26432	N/A	1.19141	N/A	CSK2B_HUMAN Casein kinase II subunit beta
P68036	UBE2L3	N/A	>200	N/A	N/A	N/A	N/A	UB2L3_HUMAN Ubiquitin-conjugating enzyme E2 L3
P68036-3	UBE2L3	11.9385	26.196	7.1165	2.19426	0.596099	proteasome	UB2L3_HUMAN Isoform 3 of Ubiquitin-conjugating enzyme E2 L3
P68363	TUBA1B	15.0947	173.721	17.3808	11.5088	1.15145	proteasome	TBA1B_HUMAN Tubulin alpha-1B chain
P68371	TUBB4B	9.93475	>200	N/A	20.1314	N/A	N/A	TBB4B_HUMAN Tubulin beta-4B chain
P68402	PAFAH1B2	11.6534	N/A	9.68624	N/A	0.831191	N/A	PA1B2_HUMAN Platelet-activating factor acetylhydrolase IB subunit beta
P68431	HIST1H3A	1.28185	2.14344	1.77552	1.67215	1.38513	not certain	H31_HUMAN Histone H3.1
P78312	FAM193A	N/A	63.767	N/A	N/A	N/A	N/A	F193A_HUMAN Protein FAM193A
P78316	NOP14	5.89762	14.1922	8.18162	2.40643	1.38728	proteasome	NOP14_HUMAN Nucleolar protein 14
P78318	IGBP1	11.5352	>200	N/A	17.3383	N/A	N/A	IGBP1_HUMAN Immunoglobulin-binding protein 1
P78332	RBM6	11.457	19.8723	12.5434	1.73452	1.09482	not certain	RBM6_HUMAN RNA-binding protein 6
P78344	EIF4G2	6.99089	38.6585	9.13237	5.52984	1.30632	proteasome	IF4G2_HUMAN Eukaryotic translation initiation factor 4 gamma 2
P78345	RPP38	N/A	N/A	17.9062	N/A	N/A	N/A	RPP38_HUMAN Ribonuclease P protein subunit p38
P78346-2	RPP30	9.02418	N/A	N/A	N/A	N/A	N/A	RPP30_HUMAN Isoform 2 of Ribonuclease P protein subunit p30
P78347	GTF2I	10.3905	23.9099	21.2752	2.30114	2.04758	both	GTF2I_HUMAN General transcription factor II-I
P78356	PIP4K2B	18.9644	N/A	157.176	N/A	8.28798	N/A	PI42B_HUMAN Phosphatidylinositol 5-phosphate 4-kinase type-2 beta
P78362-2	SRPK2	N/A	N/A	29.2467	N/A	N/A	N/A	SRPK2_HUMAN Isoform 2 of SRSF protein kinase 2
P78371	CCT2	7.16209	13.8796	14.4406	1.93793	2.01625	lysosome	TCPB_HUMAN T-complex protein 1 subunit beta
P78382	SLC35A1	N/A	N/A	126.027	N/A	N/A	N/A	S35A1_HUMAN CMP-sialic acid transporter
P78383	SLC35B1	N/A	21.8866	N/A	N/A	N/A	N/A	S35B1_HUMAN Solute carrier family 35 member B1
P78406	RAE1	8.13171	14.8203	7.17544	1.82254	0.882402	not certain	RAE1L_HUMAN mRNA export factor
P78411	IRX5	N/A	13.827	3.51994	N/A	N/A	N/A	IRX5_HUMAN Iroquois-class homeodomain protein IRX-5
P78413	IRX4	5.52925	10.005	N/A	1.80947	N/A	N/A	IRX4_HUMAN Iroquois-class homeodomain protein IRX-4
P78417	GSTO1	12.8029	46.8659	37.427	3.66058	2.92333	both	GSTO1_HUMAN Glutathione S-transferase omega-1
P78527	PRKDC	25.0324	16.2634	29.3582	0.649695	1.17281	not certain	PRKDC_HUMAN DNA-dependent protein kinase catalytic subunit
P78549	NTHL1	5.01155	N/A	6.02842	N/A	1.2029	N/A	NTHL1_HUMAN Endonuclease III-like protein 1
P80404	ABAT	7.90813	9.47958	7.80308	1.19871	0.986716	not certain	GABT_HUMAN 4-aminobutyrate aminotransferase, mitochondrial
P81274	GPSM2	5.41564	26.0386	N/A	4.80804	N/A	N/A	GPSM2_HUMAN G-protein-signaling modulator 2
P82650	MRPS22	8.60198	9.45502	8.74744	1.09917	1.01691	not certain	RT22_HUMAN 28S ribosomal protein S22, mitochondrial
P82663	MRPS25	3.75791	6.86692	4.50359	1.82732	1.19843	not certain	RT25_HUMAN 28S ribosomal protein S25, mitochondrial
P82673	MRPS35	2.57589	5.45227	3.57458	2.11665	1.38771	proteasome	RT35_HUMAN 28S ribosomal protein S35, mitochondrial
P82675	MRPS5	9.55275	17.2768	10.4943	1.80857	1.09856	not certain	RT05_HUMAN 28S ribosomal protein S5, mitochondrial
P82912	MRPS11	5.99764	N/A	11.0216	N/A	1.83765	N/A	RT11_HUMAN 28S ribosomal protein S11, mitochondrial
P82914	MRPS15	3.8719	5.82672	3.98635	1.50488	1.02956	not certain	RT15_HUMAN 28S ribosomal protein S15, mitochondrial
P82930	MRPS34	3.95564	6.81762	N/A	1.72352	N/A	N/A	RT34_HUMAN 28S ribosomal protein S34, mitochondrial
P82932	MRPS6	6.77629	N/A	N/A	N/A	N/A	N/A	RT06_HUMAN 28S ribosomal protein S6, mitochondrial
P82933	MRPS9	7.78642	18.7185	7.5845	2.404	0.974067	proteasome	RT09_HUMAN 28S ribosomal protein S9, mitochondrial
P82979	SARNP	13.0193	55.0117	>200	4.2254	15.3618	both	SARNP_HUMAN SAP domain-containing ribonucleoprotein
P83111	LACTB	6.19933	7.49267	6.72175	1.20863	1.08427	not certain	LACTB_HUMAN Serine beta-lactamase-like protein LACTB, mitochondrial
P83436	COG7	4.66892	15.5904	N/A	3.33918	N/A	N/A	COG7_HUMAN Conserved oligomeric Golgi complex subunit 7
P83731	RPL24	5.6436	13.3272	5.47769	2.36147	0.970602	proteasome	RL24_HUMAN 60S ribosomal protein L24
P83881	RPL36A	4.14116	11.1492	2.15772	2.6923	0.521043	proteasome	RL36A_HUMAN 60S ribosomal protein L36a
P84022	SMAD3	N/A	49.8309	N/A	N/A	N/A	N/A	SMAD3_HUMAN Mothers against decapentaplegic homolog 3
P84090	ERH	11.0339	51.117	13.7203	4.63274	1.24347	proteasome	ERH_HUMAN Enhancer of rudimentary homolog
P84095	RHOG	N/A	178.187	41.7056	N/A	N/A	N/A	RHOG_HUMAN Rho-related GTP-binding protein RhoG
P84098	RPL19	3.51192	11.5853	7.33567	3.29885	2.08879	both	RL19_HUMAN 60S ribosomal protein L19
P84101	SERF2	4.06419	9.98627	4.47048	2.45714	1.09997	proteasome	SERF2_HUMAN Small EDRK-rich factor 2
P84101-2	SERF2	N/A	10.3362	2.92615	N/A	N/A	N/A	SERF2_HUMAN Isoform 2 of Small EDRK-rich factor 2
P84103	SRSF3	12.3182	67.4268	29.1483	5.47374	2.36627	both	SRSF3_HUMAN Serine/arginine-rich splicing factor 3
P84243	H3F3A	0.955551	0.861256	0.72297	0.901318	0.7566	not certain	H33_HUMAN Histone H3.3
P85037	FOXK1	N/A	46.7711	26.8454	N/A	N/A	N/A	FOXK1_HUMAN Forkhead box protein K1
P86791	CCZ1	3.23387	N/A	3.97972	N/A	1.23064	N/A	CCZ1_HUMAN Vacuolar fusion protein CCZ1 homolog
P98170	XIAP	N/A	N/A	10.3873	N/A	N/A	N/A	XIAP_HUMAN E3 ubiquitin-protein ligase XIAP
P98175	RBM10	11.5198	>200	14.4798	17.3614	1.25695	proteasome	RBM10_HUMAN RNA-binding protein 10
P99999	CYCS	8.64812	148.744	9.19415	17.1996	1.06314	proteasome	CYC_HUMAN Cytochrome c
Q00005-7	PPP2R2B	N/A	20.8215	N/A	N/A	N/A	N/A	2ABB_HUMAN Isoform 7 of Serine/threonine-protein phosphatase 2A 55 kDa regulatory subunit B beta isoform
Q00059	TFAM	11.9901	25.3158	10.8085	2.1114	0.90145	proteasome	TFAM_HUMAN Transcription factor A, mitochondrial
Q00169	PITPNA	10.0777	21.7629	16.1912	2.1595	1.60663	proteasome	PIPNA_HUMAN Phosphatidylinositol transfer protein alpha isoform
Q00266	MAT1A	6.83038	18.131	10.7132	2.65446	1.56847	proteasome	METK1_HUMAN S-adenosylmethionine synthase isoform type-1
Q00325	SLC25A3	12.2033	57.0961	26.2159	4.67875	2.14826	both	MPCP_HUMAN Phosphate carrier protein, mitochondrial
Q00341	HDLBP	12.4086	19.6526	23.1744	1.58378	1.8676	not certain	VIGLN_HUMAN Vigilin
Q00403	GTF2B	6.19767	N/A	9.15046	N/A	1.47644	N/A	TF2B_HUMAN Transcription initiation factor IIB
Q00526	CDK3	7.51135	16.2978	5.71998	2.16976	0.761512	proteasome	CDK3_HUMAN Cyclin-dependent kinase 3
Q00535	CDK5	12.4064	123.336	N/A	9.94128	N/A	N/A	CDK5_HUMAN Cyclin-dependent kinase 5
Q00536-2	CDK16	9.09165	N/A	9.77089	N/A	1.07471	N/A	CDK16_HUMAN Isoform 2 of Cyclin-dependent kinase 16
Q00537	CDK17	7.49754	N/A	7.97821	N/A	1.06411	N/A	CDK17_HUMAN Cyclin-dependent kinase 17
Q00610	CLTC	5.27509	9.07855	5.90516	1.72102	1.11944	not certain	CLH1_HUMAN Clathrin heavy chain 1
Q00613	HSF1	11.2964	26.3254	N/A	2.33042	N/A	N/A	HSF1_HUMAN Heat shock factor protein 1
Q00653	NFKB2	5.80525	11.6888	6.13948	2.01349	1.05757	proteasome	NFKB2_HUMAN Nuclear factor NF-kappa-B p100 subunit
Q00688	FKBP3	9.87671	54.3219	14.0798	5.5	1.42555	proteasome	FKBP3_HUMAN Peptidyl-prolyl cis-trans isomerase FKBP3
Q00765	REEP5	28.4894	>200	99.4472	7.02015	3.49067	both	REEP5_HUMAN Receptor expression-enhancing protein 5
Q00839	HNRNPU	12.2681	23.1899	10.7581	1.89026	0.876921	not certain	HNRPU_HUMAN Heterogeneous nuclear ribonucleoprotein U
Q00839-2	HNRNPU	18.7489	N/A	10.6605	N/A	0.568594	N/A	HNRPU_HUMAN Isoform Short of Heterogeneous nuclear ribonucleoprotein U
Q00978	IRF9	3.66009	5.12455	4.26946	1.40012	1.16649	not certain	IRF9_HUMAN Interferon regulatory factor 9
Q01081	U2AF1	7.65401	8.61695	8.84681	1.12581	1.15584	not certain	U2AF1_HUMAN Splicing factor U2AF 35 kDa subunit
Q01082	SPTBN1	21.9837	165.035	96.8083	7.50714	4.40363	both	SPTB2_HUMAN Spectrin beta chain, non-erythrocytic 1
Q01082-3	SPTBN1	13.4749	N/A	N/A	N/A	N/A	N/A	SPTB2_HUMAN Isoform 2 of Spectrin beta chain, non-erythrocytic 1
Q01085-2	TIAL1	8.47058	20.5743	14.3449	2.42891	1.6935	proteasome	TIAR_HUMAN Isoform 2 of Nucleolysin TIAR
Q01130	SRSF2	20.5255	N/A	45.692	N/A	2.2261	N/A	SRSF2_HUMAN Serine/arginine-rich splicing factor 2
Q01167	FOXK2	6.37494	N/A	N/A	N/A	N/A	N/A	FOXK2_HUMAN Forkhead box protein K2
Q01518	CAP1	10.2902	28.2571	52.912	2.74603	5.14198	both	CAP1_HUMAN Adenylyl cyclase-associated protein 1
Q01581	HMGCS1	N/A	28.7971	N/A	N/A	N/A	N/A	HMCS1_HUMAN Hydroxymethylglutaryl-CoA synthase, cytoplasmic
Q01628	IFITM3	8.06736	8.77957	6.18164	1.08828	0.766253	not certain	IFM3_HUMAN Interferon-induced transmembrane protein 3
Q01650	SLC7A5	6.68158	10.4832	N/A	1.56897	N/A	N/A	LAT1_HUMAN Large neutral amino acids transporter small subunit 1
Q01780	EXOSC10	9.27784	16.4059	13.9438	1.76828	1.50292	not certain	EXOSX_HUMAN Exosome component 10
Q01804	OTUD4	N/A	N/A	46.5825	N/A	N/A	N/A	OTUD4_HUMAN OTU domain-containing protein 4
Q01813	PFKP	14.3866	29.408	21.1972	2.04412	1.47339	proteasome	K6PP_HUMAN 6-phosphofructokinase type C
Q01831	XPC	7.63799	N/A	N/A	N/A	N/A	N/A	XPC_HUMAN DNA repair protein complementing XP-C cells
Q01844-5	EWSR1	8.35318	21.7219	8.71664	2.60044	1.04351	proteasome	EWS_HUMAN Isoform 5 of RNA-binding protein EWS
Q01995	TAGLN	N/A	19.032	12.5525	N/A	N/A	N/A	TAGL_HUMAN Transgelin
Q02086	SP2	N/A	165.825	9.7999	N/A	N/A	N/A	SP2_HUMAN Transcription factor Sp2
Q02156	PRKCE	18.5185	N/A	15.3419	N/A	0.828464	N/A	KPCE_HUMAN Protein kinase C epsilon type
Q02218	OGDH	9.79298	10.5374	14.0086	1.07601	1.43048	not certain	ODO1_HUMAN 2-oxoglutarate dehydrogenase, mitochondrial
Q02224	CENPE	N/A	34.2972	>200	N/A	N/A	N/A	CENPE_HUMAN Centromere-associated protein E
Q02241	KIF23	6.64953	18.6731	9.41265	2.80819	1.41554	proteasome	KIF23_HUMAN Kinesin-like protein KIF23
Q02252	ALDH6A1	6.35274	10.1933	6.1866	1.60456	0.973849	not certain	MMSA_HUMAN Methylmalonate-semialdehyde dehydrogenase [acylating], mitochondrial
Q02338	BDH1	6.44728	11.4513	9.26915	1.77614	1.43768	not certain	BDH_HUMAN D-beta-hydroxybutyrate dehydrogenase, mitochondrial
Q02388	COL7A1	N/A	>200	N/A	N/A	N/A	N/A	CO7A1_HUMAN Collagen alpha-1(VII) chain
Q02447	SP3	7.19929	N/A	N/A	N/A	N/A	N/A	SP3_HUMAN Transcription factor Sp3
Q02543	RPL18A	9.35548	80.6923	15.5554	8.62515	1.6627	proteasome	RL18A_HUMAN 60S ribosomal protein L18a
Q02750	MAP2K1	11.6908	19.2221	14.611	1.6442	1.24979	not certain	MP2K1_HUMAN Dual specificity mitogen-activated protein kinase kinase 1
Q02790	FKBP4	11.337	28.4543	53.2371	2.50985	4.69585	both	FKBP4_HUMAN Peptidyl-prolyl cis-trans isomerase FKBP4
Q02809	PLOD1	6.07012	N/A	N/A	N/A	N/A	N/A	PLOD1_HUMAN Procollagen-lysine,2-oxoglutarate 5-dioxygenase 1
Q02878	RPL6	3.68303	63.9435	6.06853	17.3616	1.6477	proteasome	RL6_HUMAN 60S ribosomal protein L6
Q02880	TOP2B	N/A	38.3802	N/A	N/A	N/A	N/A	TOP2B_HUMAN DNA topoisomerase 2-beta
Q02978	SLC25A11	19.0216	N/A	N/A	N/A	N/A	N/A	M2OM_HUMAN Mitochondrial 2-oxoglutarate/malate carrier protein
Q03001	DST	11.4684	54.751	20.9981	4.77409	1.83096	proteasome	DYST_HUMAN Dystonin
Q03060-6	CREM	9.95758	N/A	16.1912	N/A	1.62602	N/A	CREM_HUMAN Isoform 3 of cAMP-responsive element modulator
Q03112-3	MECOM	N/A	16.9681	6.60644	N/A	N/A	N/A	EVI1_HUMAN Isoform 2 of MDS1 and EVI1 complex locus protein EVI1
Q03113	GNA12	8.89448	23.0895	N/A	2.59594	N/A	N/A	GNA12_HUMAN Guanine nucleotide-binding protein subunit alpha-12
Q03164-3	KMT2A	9.73932	N/A	N/A	N/A	N/A	N/A	KMT2A_HUMAN Isoform 3 of Histone-lysine N-methyltransferase 2A
Q03167	TGFBR3	9.07736	N/A	N/A	N/A	N/A	N/A	TGBR3_HUMAN Transforming growth factor beta receptor type 3
Q03252	LMNB2	7.84902	N/A	11.5621	N/A	1.47306	N/A	LMNB2_HUMAN Lamin-B2
Q03519	TAP2	N/A	10.9037	18.4544	N/A	N/A	N/A	TAP2_HUMAN Antigen peptide transporter 2
Q03701	CEBPZ	9.04892	91.565	19.0425	10.1189	2.1044	both	CEBPZ_HUMAN CCAAT/enhancer-binding protein zeta
Q04637-9	EIF4G1	10.3796	19.9237	136.986	1.91952	13.1976	lysosome	IF4G1_HUMAN Isoform 9 of Eukaryotic translation initiation factor 4 gamma 1
Q04724	TLE1	N/A	58.1988	N/A	N/A	N/A	N/A	TLE1_HUMAN Transducin-like enhancer protein 1
Q04726	TLE3	7.62706	N/A	N/A	N/A	N/A	N/A	TLE3_HUMAN Transducin-like enhancer protein 3
Q04727-3	TLE4	7.15618	N/A	6.44788	N/A	0.901023	N/A	TLE4_HUMAN Isoform 3 of Transducin-like enhancer protein 4
Q04760	GLO1	N/A	N/A	9.80961	N/A	N/A	N/A	LGUL_HUMAN Lactoylglutathione lyase
Q04837	SSBP1	20.3448	>200	>200	9.83052	9.83052	both	SSBP_HUMAN Single-stranded DNA-binding protein, mitochondrial
Q04917	YWHAH	13.4175	13.4331	18.4495	1.00116	1.37503	not certain	1433F_HUMAN 14-3-3 protein eta
Q05048	CSTF1	8.14318	57.5704	14.7478	7.06977	1.81106	proteasome	CSTF1_HUMAN Cleavage stimulation factor subunit 1
Q05084	ICA1	5.76662	N/A	N/A	N/A	N/A	N/A	ICA69_HUMAN Islet cell autoantigen 1
Q05084-2	ICA1	7.27027	33.9113	N/A	4.66438	N/A	N/A	ICA69_HUMAN Isoform 2 of Islet cell autoantigen 1
Q05086	UBE3A	16.0972	N/A	32.835	N/A	2.03979	N/A	UBE3A_HUMAN Ubiquitin-protein ligase E3A
Q05193	DNM1	12.0736	73.9752	28.3264	6.127	2.34614	both	DYN1_HUMAN Dynamin-1
Q05209	PTPN12	20.4891	>200	N/A	9.76127	N/A	N/A	PTN12_HUMAN Tyrosine-protein phosphatase non-receptor type 12
Q05397-5	PTK2	11.6456	N/A	13.6419	N/A	1.17142	N/A	FAK1_HUMAN Isoform 5 of Focal adhesion kinase 1
Q05481	ZNF91	4.92852	11.16	4.71689	2.26437	0.95706	proteasome	ZNF91_HUMAN Zinc finger protein 91
Q05519	SRSF11	N/A	16.824	17.7185	N/A	N/A	N/A	SRS11_HUMAN Serine/arginine-rich splicing factor 11
Q05639	EEF1A2	5.67642	7.58533	5.21987	1.33629	0.919572	not certain	EF1A2_HUMAN Elongation factor 1-alpha 2
Q05655-2	PRKCD	10.507	17.1486	17.9293	1.63211	1.70641	not certain	KPCD_HUMAN Isoform 2 of Protein kinase C delta type
Q06124	PTPN11	10.3393	N/A	10.5921	N/A	1.02445	N/A	PTN11_HUMAN Tyrosine-protein phosphatase non-receptor type 11
Q06210	GFPT1	N/A	N/A	26.8558	N/A	N/A	N/A	GFPT1_HUMAN Glutamine--fructose-6-phosphate aminotransferase [isomerizing] 1
Q06323-2	PSME1	16.4839	11.8873	22.4756	0.721146	1.36349	not certain	PSME1_HUMAN Isoform 2 of Proteasome activator complex subunit 1
Q06546	GABPA	N/A	19.8212	N/A	N/A	N/A	N/A	GABPA_HUMAN GA-binding protein alpha chain
Q06587	RING1	16.4136	24.219	N/A	1.47554	N/A	N/A	RING1_HUMAN E3 ubiquitin-protein ligase RING1
Q06787	FMR1	9.69708	N/A	N/A	N/A	N/A	N/A	FMR1_HUMAN Fragile X mental retardation protein 1
Q06830	PRDX1	15.3216	46.1483	35.5096	3.01198	2.31762	both	PRDX1_HUMAN Peroxiredoxin-1
Q07000	HLA-C	N/A	N/A	1.51227	N/A	N/A	N/A	1C15_HUMAN HLA class I histocompatibility antigen, Cw-15 alpha chain
Q07020	RPL18	5.24476	11.3538	3.6468	2.16478	0.695323	proteasome	RL18_HUMAN 60S ribosomal protein L18
Q07157	TJP1	10.1501	21.8314	25.1596	2.15087	2.47877	both	ZO1_HUMAN Tight junction protein ZO-1
Q07617	SPAG1	12.3622	>200	12.2877	16.1784	0.993973	proteasome	SPAG1_HUMAN Sperm-associated antigen 1
Q07666	KHDRBS1	36.7328	>200	>200	5.44473	5.44473	both	KHDR1_HUMAN KH domain-containing, RNA-binding, signal transduction-associated protein 1
Q07820	MCL1	1.58738	5.14509	1.89805	3.24124	1.19571	proteasome	MCL1_HUMAN Induced myeloid leukemia cell differentiation protein Mcl-1
Q07866-9	KLC1	7.88743	21.7219	9.28032	2.754	1.1766	proteasome	KLC1_HUMAN Isoform I of Kinesin light chain 1
Q07889	SOS1	15.6963	33.9113	N/A	2.16047	N/A	N/A	SOS1_HUMAN Son of sevenless homolog 1
Q07955	SRSF1	N/A	N/A	15.4893	N/A	N/A	N/A	SRSF1_HUMAN Serine/arginine-rich splicing factor 1
Q07955-2	SRSF1	11.7145	>200	90.1362	17.0729	7.69441	both	SRSF1_HUMAN Isoform ASF-2 of Serine/arginine-rich splicing factor 1
Q07960	ARHGAP1	11.1349	48.7445	20.0216	4.37764	1.79809	proteasome	RHG01_HUMAN Rho GTPase-activating protein 1
Q08050-3	FOXM1	8.25863	N/A	N/A	N/A	N/A	N/A	FOXM1_HUMAN Isoform 4 of Forkhead box protein M1
Q08117-2	AES	N/A	8.49341	N/A	N/A	N/A	N/A	AES_HUMAN Isoform 2 of Amino-terminal enhancer of split
Q08170	SRSF4	N/A	95.7386	>200	N/A	N/A	N/A	SRSF4_HUMAN Serine/arginine-rich splicing factor 4
Q08209	PPP3CA	11.5256	186.832	12.6556	16.2102	1.09805	proteasome	PP2BA_HUMAN Serine/threonine-protein phosphatase 2B catalytic subunit alpha isoform
Q08209-2	PPP3CA	10.8017	78.7667	14.1487	7.29205	1.30986	proteasome	PP2BA_HUMAN Isoform 2 of Serine/threonine-protein phosphatase 2B catalytic subunit alpha isoform
Q08211	DHX9	15.1441	>200	17.2082	13.2064	1.1363	proteasome	DHX9_HUMAN ATP-dependent RNA helicase A
Q08345-5	DDR1	N/A	5.23802	N/A	N/A	N/A	N/A	DDR1_HUMAN Isoform 4 of Epithelial discoidin domain-containing receptor 1
Q08379	GOLGA2	7.1695	106.802	N/A	14.8968	N/A	N/A	GOGA2_HUMAN Golgin subfamily A member 2
Q08380	LGALS3BP	1.7815	N/A	3.50517	N/A	1.96753	N/A	LG3BP_HUMAN Galectin-3-binding protein
Q08623-4	HDHD1	23.9677	>200	N/A	8.34455	N/A	N/A	HDHD1_HUMAN Isoform 4 of Pseudouridine-5'-monophosphatase
Q08722	CD47	15.1045	49.7593	18.4741	3.29433	1.22308	proteasome	CD47_HUMAN Leukocyte surface antigen CD47
Q08752	PPID	12.3843	30.0845	11.0093	2.42925	0.888977	proteasome	PPID_HUMAN Peptidyl-prolyl cis-trans isomerase D
Q08945	SSRP1	7.17098	N/A	11.4551	N/A	1.59742	N/A	SSRP1_HUMAN FACT complex subunit SSRP1
Q08AD1	CAMSAP2	17.7776	21.942	23.2366	1.23425	1.30707	not certain	CAMP2_HUMAN Calmodulin-regulated spectrin-associated protein 2
Q08AF3	SLFN5	15.1508	28.2111	28.7017	1.86203	1.89441	not certain	SLFN5_HUMAN Schlafen family member 5
Q08J23	NSUN2	12.9126	18.613	23.8441	1.44146	1.84658	not certain	NSUN2_HUMAN tRNA (cytosine(34)-C(5))-methyltransferase
Q09161	NCBP1	11.378	25.1231	18.7135	2.20805	1.64471	proteasome	NCBP1_HUMAN Nuclear cap-binding protein subunit 1
Q09328	MGAT5	N/A	12.2464	9.76676	N/A	N/A	N/A	MGT5A_HUMAN Alpha-1,6-mannosylglycoprotein 6-beta-N-acetylglucosaminyltransferase A
Q09666	AHNAK	13.5539	28.8211	>200	2.1264	14.7559	both	AHNK_HUMAN Neuroblast differentiation-associated protein AHNAK
Q10471	GALNT2	14.0285	23.5125	16.8158	1.67605	1.19869	not certain	GALT2_HUMAN Polypeptide N-acetylgalactosaminyltransferase 2
Q10472	GALNT1	13.7148	N/A	N/A	N/A	N/A	N/A	GALT1_HUMAN Polypeptide N-acetylgalactosaminyltransferase 1
Q10567	AP1B1	6.6636	N/A	13.1627	N/A	1.97531	N/A	AP1B1_HUMAN AP-1 complex subunit beta-1
Q10713	PMPCA	N/A	17.606	N/A	N/A	N/A	N/A	MPPA_HUMAN Mitochondrial-processing peptidase subunit alpha
Q11201	ST3GAL1	10.7498	47.5084	26.4762	4.41947	2.46295	both	SIA4A_HUMAN CMP-N-acetylneuraminate-beta-galactosamide-alpha-2,3-sialyltransferase 1
Q11206-4	ST3GAL4	N/A	>200	N/A	N/A	N/A	N/A	SIA4C_HUMAN Isoform 4 of CMP-N-acetylneuraminate-beta-galactosamide-alpha-2,3-sialyltransferase 4
Q12778	FOXO1	4.32541	N/A	6.56141	N/A	1.51694	N/A	FOXO1_HUMAN Forkhead box protein O1
Q12792	TWF1	10.6425	N/A	61.8881	N/A	5.81518	N/A	TWF1_HUMAN Twinfilin-1
Q12792-3	TWF1	17.039	12.2464	43.2676	0.718728	2.53933	lysosome	TWF1_HUMAN Isoform 3 of Twinfilin-1
Q12797	ASPH	30.2288	12.1095	21.1972	0.400594	0.701223	not certain	ASPH_HUMAN Aspartyl/asparaginyl beta-hydroxylase
Q12802-2	AKAP13	N/A	38.4015	N/A	N/A	N/A	N/A	AKP13_HUMAN Isoform 2 of A-kinase anchor protein 13
Q12816	TRO	N/A	18.7236	6.33532	N/A	N/A	N/A	TROP_HUMAN Trophinin
Q12824	SMARCB1	7.56959	19.7422	N/A	2.60809	N/A	N/A	SNF5_HUMAN SWI/SNF-related matrix-associated actin-dependent regulator of chromatin subfamily B member 1
Q12830	BPTF	10.563	>200	8.38552	18.9339	0.793854	proteasome	BPTF_HUMAN Nucleosome-remodeling factor subunit BPTF
Q12834	CDC20	2.70824	5.85181	N/A	2.16074	N/A	N/A	CDC20_HUMAN Cell division cycle protein 20 homolog
Q12840	KIF5A	17.1954	N/A	>200	N/A	11.631	N/A	KIF5A_HUMAN Kinesin heavy chain isoform 5A
Q12846	STX4	9.85004	17.1105	N/A	1.7371	N/A	N/A	STX4_HUMAN Syntaxin-4
Q12849	GRSF1	7.39988	13.0095	12.5388	1.75807	1.69446	not certain	GRSF1_HUMAN G-rich sequence factor 1
Q12857-4	NFIA	N/A	17.9293	N/A	N/A	N/A	N/A	NFIA_HUMAN Isoform 4 of Nuclear factor 1 A-type
Q12872-2	SFSWAP	11.3111	53.278	N/A	4.71022	N/A	N/A	SFSWA_HUMAN Isoform 2 of Splicing factor, suppressor of white-apricot homolog
Q12873-3	CHD3	6.78359	20.9727	N/A	3.09168	N/A	N/A	CHD3_HUMAN Isoform 3 of Chromodomain-helicase-DNA-binding protein 3
Q12874	SF3A3	13.1577	32.7574	51.8435	2.4896	3.94016	both	SF3A3_HUMAN Splicing factor 3A subunit 3
Q12882	DPYD	N/A	20.4649	N/A	N/A	N/A	N/A	DPYD_HUMAN Dihydropyrimidine dehydrogenase [NADP(+)]
Q12894	IFRD2	6.46834	N/A	N/A	N/A	N/A	N/A	IFRD2_HUMAN Interferon-related developmental regulator 2
Q12904-2	AIMP1	12.5479	22.1241	15.8072	1.76317	1.25975	not certain	AIMP1_HUMAN Isoform 2 of Aminoacyl tRNA synthase complex-interacting multifunctional protein 1
Q12905	ILF2	8.50592	10.0983	11.8568	1.18721	1.39394	not certain	ILF2_HUMAN Interleukin enhancer-binding factor 2
Q12906-7	ILF3	11.1997	24.7199	55.9441	2.2072	4.99516	both	ILF3_HUMAN Isoform 7 of Interleukin enhancer-binding factor 3
Q12907	LMAN2	14.1142	N/A	>200	N/A	14.1702	N/A	LMAN2_HUMAN Vesicular integral-membrane protein VIP36
Q12929	EPS8	11.7443	54.1099	10.844	4.60734	0.923342	proteasome	EPS8_HUMAN Epidermal growth factor receptor kinase substrate 8
Q12931	TRAP1	13.4045	10.2521	31.4924	0.764828	2.34939	lysosome	TRAP1_HUMAN Heat shock protein 75 kDa, mitochondrial
Q12948	FOXC1	N/A	7.5024	N/A	N/A	N/A	N/A	FOXC1_HUMAN Forkhead box protein C1
Q12955	ANK3	17.3373	N/A	N/A	N/A	N/A	N/A	ANK3_HUMAN Ankyrin-3
Q12972	PPP1R8	12.9706	31.7375	18.1262	2.44689	1.39749	proteasome	PP1R8_HUMAN Nuclear inhibitor of protein phosphatase 1
Q12979	ABR	N/A	25.0686	14.8712	N/A	N/A	N/A	ABR_HUMAN Active breakpoint cluster region-related protein
Q12981-1	BNIP1	10.0573	N/A	53.3601	N/A	5.30562	N/A	SEC20_HUMAN Isoform 3 of Vesicle transport protein SEC20
Q12982-2	BNIP2	14.198	N/A	12.169	N/A	0.857093	N/A	BNIP2_HUMAN Isoform 2 of BCL2/adenovirus E1B 19 kDa protein-interacting protein 2
Q12983	BNIP3	N/A	5.85478	N/A	N/A	N/A	N/A	BNIP3_HUMAN BCL2/adenovirus E1B 19 kDa protein-interacting protein 3
Q12986	NFX1	N/A	85.258	N/A	N/A	N/A	N/A	NFX1_HUMAN Transcriptional repressor NF-X1
Q12996	CSTF3	13.6877	>200	63.5332	14.6116	4.64161	both	CSTF3_HUMAN Cleavage stimulation factor subunit 3
Q12999	TSPAN31	N/A	36.7133	N/A	N/A	N/A	N/A	TSN31_HUMAN Tetraspanin-31
Q13011	ECH1	5.66528	10.6786	7.75766	1.88492	1.36933	not certain	ECH1_HUMAN Delta(3,5)-Delta(2,4)-dienoyl-CoA isomerase, mitochondrial
Q13045	FLII	5.41352	N/A	N/A	N/A	N/A	N/A	FLII_HUMAN Protein flightless-1 homolog
Q13057-2	COASY	11.2342	N/A	N/A	N/A	N/A	N/A	COASY_HUMAN Isoform 2 of Bifunctional coenzyme A synthase
Q13084	MRPL28	4.24566	4.57734	3.22784	1.07812	0.760268	not certain	RM28_HUMAN 39S ribosomal protein L28, mitochondrial
Q13107	USP4	N/A	24.5275	N/A	N/A	N/A	N/A	UBP4_HUMAN Ubiquitin carboxyl-terminal hydrolase 4
Q13112	CHAF1B	N/A	10.2279	18.8049	N/A	N/A	N/A	CAF1B_HUMAN Chromatin assembly factor 1 subunit B
Q13118	KLF10	N/A	2.20131	N/A	N/A	N/A	N/A	KLF10_HUMAN Krueppel-like factor 10
Q13123	IK	5.53367	13.7803	8.39161	2.49026	1.51646	proteasome	RED_HUMAN Protein Red
Q13127	REST	2.18094	5.34382	2.46812	2.45024	1.13168	proteasome	REST_HUMAN RE1-silencing transcription factor
Q13131-2	PRKAA1	N/A	>200	N/A	N/A	N/A	N/A	AAPK1_HUMAN Isoform 2 of 5'-AMP-activated protein kinase catalytic subunit alpha-1
Q13136	PPFIA1	12.688	48.6761	>200	3.83638	15.7629	both	LIPA1_HUMAN Liprin-alpha-1
Q13137-4	CALCOCO2	N/A	N/A	14.1603	N/A	N/A	N/A	CACO2_HUMAN Isoform 4 of Calcium-binding and coiled-coil domain-containing protein 2
Q13144	EIF2B5	11.3836	26.3956	15.5205	2.31874	1.36341	proteasome	EI2BE_HUMAN Translation initiation factor eIF-2B subunit epsilon
Q13148	TARDBP	9.66328	13.8574	14.2535	1.43403	1.47502	not certain	TADBP_HUMAN TAR DNA-binding protein 43
Q13151	HNRNPA0	8.45405	73.7391	13.538	8.72234	1.60137	proteasome	ROA0_HUMAN Heterogeneous nuclear ribonucleoprotein A0
Q13155	AIMP2	5.33354	14.3836	8.14605	2.69683	1.52732	proteasome	AIMP2_HUMAN Aminoacyl tRNA synthase complex-interacting multifunctional protein 2
Q13158	FADD	N/A	62.502	N/A	N/A	N/A	N/A	FADD_HUMAN Protein FADD
Q13177	PAK2	10.1308	49.3695	15.8036	4.87322	1.55996	proteasome	PAK2_HUMAN Serine/threonine-protein kinase PAK 2
Q13185	CBX3	21.9073	53.278	23.8687	2.43198	1.08953	proteasome	CBX3_HUMAN Chromobox protein homolog 3
Q13188	STK3	7.11577	196.359	N/A	27.5949	N/A	N/A	STK3_HUMAN Serine/threonine-protein kinase 3
Q13190	STX5	14.6079	13.0266	11.457	0.89175	0.784298	not certain	STX5_HUMAN Syntaxin-5
Q13191	CBLB	6.49683	37.0469	13.6473	5.7023	2.10061	both	CBLB_HUMAN E3 ubiquitin-protein ligase CBL-B
Q13200	PSMD2	6.11349	27.9382	5.98676	4.56993	0.979271	proteasome	PSMD2_HUMAN 26S proteasome non-ATPase regulatory subunit 2
Q13207	TBX2	N/A	14.9417	N/A	N/A	N/A	N/A	TBX2_HUMAN T-box transcription factor TBX2
Q13217	DNAJC3	12.6371	14.6018	23.746	1.15547	1.87907	not certain	DNJC3_HUMAN DnaJ homolog subfamily C member 3
Q13227	GPS2	8.72103	N/A	N/A	N/A	N/A	N/A	GPS2_HUMAN G protein pathway suppressor 2
Q13228	SELENBP1	6.85131	N/A	N/A	N/A	N/A	N/A	SBP1_HUMAN Selenium-binding protein 1
Q13242	SRSF9	7.6279	28.9173	9.72838	3.79099	1.27537	proteasome	SRSF9_HUMAN Serine/arginine-rich splicing factor 9
Q13243	SRSF5	10.7149	13.0291	9.62838	1.21598	0.898597	not certain	SRSF5_HUMAN Serine/arginine-rich splicing factor 5
Q13247	SRSF6	N/A	>200	N/A	N/A	N/A	N/A	SRSF6_HUMAN Serine/arginine-rich splicing factor 6
Q13257	MAD2L1	N/A	N/A	47.2171	N/A	N/A	N/A	MD2L1_HUMAN Mitotic spindle assembly checkpoint protein MAD2A
Q13263	TRIM28	16.3555	21.0172	>200	1.28502	12.2283	lysosome	TIF1B_HUMAN Transcription intermediary factor 1-beta
Q13283	G3BP1	6.85131	14.0998	32.2244	2.05797	4.70339	both	G3BP1_HUMAN Ras GTPase-activating protein-binding protein 1
Q13310-3	PABPC4	8.85132	16.476	15.3998	1.86142	1.73984	not certain	PABP4_HUMAN Isoform 3 of Polyadenylate-binding protein 4
Q13325	IFIT5	N/A	>200	11.8244	N/A	N/A	N/A	IFIT5_HUMAN Interferon-induced protein with tetratricopeptide repeats 5
Q13330	MTA1	9.4576	8.08146	12.0799	0.854495	1.27727	not certain	MTA1_HUMAN Metastasis-associated protein MTA1
Q13347	EIF3I	7.13702	16.0562	10.4374	2.24971	1.46243	proteasome	EIF3I_HUMAN Eukaryotic translation initiation factor 3 subunit I
Q13356	PPIL2	9.45115	N/A	10.6213	N/A	1.12381	N/A	PPIL2_HUMAN Peptidyl-prolyl cis-trans isomerase-like 2
Q13356-2	PPIL2	6.65783	15.0947	10.0939	2.2672	1.51609	proteasome	PPIL2_HUMAN Isoform 2 of Peptidyl-prolyl cis-trans isomerase-like 2
Q13362-2	PPP2R5C	14.5772	49.3695	13.2255	3.38675	0.90727	proteasome	2A5G_HUMAN Isoform Gamma-1 of Serine/threonine-protein phosphatase 2A 56 kDa regulatory subunit gamma isoform
Q13362-4	PPP2R5C	N/A	17.4333	N/A	N/A	N/A	N/A	2A5G_HUMAN Isoform 4 of Serine/threonine-protein phosphatase 2A 56 kDa regulatory subunit gamma isoform
Q13362-5	PPP2R5C	11.9859	168.24	14.5711	14.0364	1.21568	proteasome	2A5G_HUMAN Isoform 5 of Serine/threonine-protein phosphatase 2A 56 kDa regulatory subunit gamma isoform
Q13363	CTBP1	N/A	16.161	N/A	N/A	N/A	N/A	CTBP1_HUMAN C-terminal-binding protein 1
Q13404-1	UBE2V1	13.3554	22.3957	12.4198	1.6769	0.929941	not certain	UB2V1_HUMAN Isoform 1 of Ubiquitin-conjugating enzyme E2 variant 1
Q13405	MRPL49	4.54702	10.3625	3.91056	2.27897	0.860028	proteasome	RM49_HUMAN 39S ribosomal protein L49, mitochondrial
Q13409	DYNC1I2	8.14413	54.881	11.8588	6.73872	1.45612	proteasome	DC1I2_HUMAN Cytoplasmic dynein 1 intermediate chain 2
Q13416	ORC2	11.3075	23.2366	12.4331	2.05498	1.09955	proteasome	ORC2_HUMAN Origin recognition complex subunit 2
Q13418	ILK	5.29039	11.3408	15.7141	2.14365	2.9703	both	ILK_HUMAN Integrin-linked protein kinase
Q13423	NNT	N/A	24.398	13.6312	N/A	N/A	N/A	NNTM_HUMAN NAD(P) transhydrogenase, mitochondrial
Q13425	SNTB2	N/A	N/A	19.2487	N/A	N/A	N/A	SNTB2_HUMAN Beta-2-syntrophin
Q13427	PPIG	N/A	N/A	121.18	N/A	N/A	N/A	PPIG_HUMAN Peptidyl-prolyl cis-trans isomerase G
Q13428-4	TCOF1	N/A	34.4849	N/A	N/A	N/A	N/A	TCOF_HUMAN Isoform 4 of Treacle protein
Q13433	SLC39A6	N/A	N/A	3.77141	N/A	N/A	N/A	S39A6_HUMAN Zinc transporter ZIP6
Q13435	SF3B2	7.20602	11.2087	29.5459	1.55547	4.10017	lysosome	SF3B2_HUMAN Splicing factor 3B subunit 2
Q13439-5	GOLGA4	13.3503	31.7085	45.5419	2.37511	3.4113	both	GOGA4_HUMAN Isoform 5 of Golgin subfamily A member 4
Q13442	PDAP1	10.3578	34.5709	14.504	3.33766	1.40029	proteasome	HAP28_HUMAN 28 kDa heat- and acid-stable phosphoprotein
Q13443	ADAM9	5.2771	N/A	N/A	N/A	N/A	N/A	ADAM9_HUMAN Disintegrin and metalloproteinase domain-containing protein 9
Q13445	TMED1	21.8935	39.0286	19.4486	1.78266	0.888328	not certain	TMED1_HUMAN Transmembrane emp24 domain-containing protein 1
Q13451	FKBP5	14.987	36.3094	109.502	2.42273	7.30648	both	FKBP5_HUMAN Peptidyl-prolyl cis-trans isomerase FKBP5
Q13492	PICALM	9.16255	19.5253	11.6672	2.13099	1.27335	proteasome	PICAL_HUMAN Phosphatidylinositol-binding clathrin assembly protein
Q13496	MTM1	N/A	96.4043	N/A	N/A	N/A	N/A	MTM1_HUMAN Myotubularin
Q13501	SQSTM1	8.03369	7.55556	12.867	0.940484	1.60163	not certain	SQSTM_HUMAN Sequestosome-1
Q13505	MTX1	9.33406	16.7914	8.67193	1.79893	0.929063	not certain	MTX1_HUMAN Metaxin-1
Q13509	TUBB3	13.1827	N/A	13.8574	N/A	1.05118	N/A	TBB3_HUMAN Tubulin beta-3 chain
Q13523	PRPF4B	23.3147	83.4112	N/A	3.57762	N/A	N/A	PRP4B_HUMAN Serine/threonine-protein kinase PRP4 homolog
Q13526	PIN1	10.2279	141.171	N/A	13.8024	N/A	N/A	PIN1_HUMAN Peptidyl-prolyl cis-trans isomerase NIMA-interacting 1
Q13530	SERINC3	6.23895	7.24746	6.81695	1.16165	1.09264	not certain	SERC3_HUMAN Serine incorporator 3
Q13546	RIPK1	6.92247	N/A	7.89641	N/A	1.14069	N/A	RIPK1_HUMAN Receptor-interacting serine/threonine-protein kinase 1
Q13547	HDAC1	7.0306	9.43956	8.52789	1.34264	1.21297	not certain	HDAC1_HUMAN Histone deacetylase 1
Q13557-11	CAMK2D	N/A	10.8118	N/A	N/A	N/A	N/A	KCC2D_HUMAN Isoform Delta 11 of Calcium/calmodulin-dependent protein kinase type II subunit delta
Q13561-2	DCTN2	N/A	N/A	6.79223	N/A	N/A	N/A	DCTN2_HUMAN Isoform 2 of Dynactin subunit 2
Q13564	NAE1	N/A	11.267	10.1308	N/A	N/A	N/A	ULA1_HUMAN NEDD8-activating enzyme E1 regulatory subunit
Q13569	TDG	N/A	11.5256	N/A	N/A	N/A	N/A	TDG_HUMAN G/T mismatch-specific thymine DNA glycosylase
Q13572	ITPK1	10.5679	>200	12.3578	18.9253	1.16937	proteasome	ITPK1_HUMAN Inositol-tetrakisphosphate 1-kinase
Q13573	SNW1	4.99206	45.1856	7.17321	9.0515	1.43692	proteasome	SNW1_HUMAN SNW domain-containing protein 1
Q13595	TRA2A	N/A	21.9073	N/A	N/A	N/A	N/A	TRA2A_HUMAN Transformer-2 protein homolog alpha
Q13596-3	SNX1	10.0224	26.0484	14.676	2.59902	1.46432	proteasome	SNX1_HUMAN Isoform 3 of Sorting nexin-1
Q13601	KRR1	7.11504	27.3431	10.8017	3.843	1.51815	proteasome	KRR1_HUMAN KRR1 small subunit processome component homolog
Q13610	PWP1	11.5371	N/A	>200	N/A	17.3354	N/A	PWP1_HUMAN Periodic tryptophan protein 1 homolog
Q13616	CUL1	13.4827	15.4755	43.6766	1.1478	3.23945	lysosome	CUL1_HUMAN Cullin-1
Q13617-2	CUL2	9.08212	58.6419	N/A	6.45685	N/A	N/A	CUL2_HUMAN Isoform 2 of Cullin-2
Q13618	CUL3	12.695	41.6305	10.9209	3.27928	0.860249	proteasome	CUL3_HUMAN Cullin-3
Q13619	CUL4A	9.60703	30.8614	12.0443	3.21238	1.25369	proteasome	CUL4A_HUMAN Cullin-4A
Q13620	CUL4B	14.2976	42.4203	>200	2.96695	13.9884	both	CUL4B_HUMAN Cullin-4B
Q13625-3	TP53BP2	6.67193	>200	7.79956	29.9763	1.16901	proteasome	ASPP2_HUMAN Isoform 3 of Apoptosis-stimulating of p53 protein 2
Q13627	DYRK1A	9.74205	N/A	32.742	N/A	3.36089	N/A	DYR1A_HUMAN Dual specificity tyrosine-phosphorylation-regulated kinase 1A
Q13636	RAB31	15.2173	16.7023	14.0285	1.09759	0.921878	not certain	RAB31_HUMAN Ras-related protein Rab-31
Q13637	RAB32	21.7151	26.0288	110.726	1.19865	5.09904	lysosome	RAB32_HUMAN Ras-related protein Rab-32
Q13642	FHL1	22.8309	N/A	>200	N/A	8.76004	N/A	FHL1_HUMAN Four and a half LIM domains protein 1
Q13686	ALKBH1	N/A	N/A	7.95715	N/A	N/A	N/A	ALKB1_HUMAN Alkylated DNA repair protein alkB homolog 1
Q13724	MOGS	13.2991	N/A	22.3308	N/A	1.67912	N/A	MOGS_HUMAN Mannosyl-oligosaccharide glucosidase
Q13765-2	NACA	6.58823	43.2406	10.4895	6.56332	1.59216	proteasome	NACA_HUMAN Isoform 2 of Nascent polypeptide-associated complex subunit alpha
Q13795	ARFRP1	12.1264	N/A	N/A	N/A	N/A	N/A	ARFRP_HUMAN ADP-ribosylation factor-related protein 1
Q13796	SHROOM2	10.5342	145.619	N/A	13.8235	N/A	N/A	SHRM2_HUMAN Protein Shroom2
Q13813-2	SPTAN1	11.313	10.9658	>200	0.969309	17.6788	lysosome	SPTN1_HUMAN Isoform 2 of Spectrin alpha chain, non-erythrocytic 1
Q13823	GNL2	8.38451	N/A	N/A	N/A	N/A	N/A	NOG2_HUMAN Nucleolar GTP-binding protein 2
Q13838-2	DDX39B	13.4801	13.8105	39.0946	1.02451	2.90017	lysosome	DX39B_HUMAN Isoform 2 of Spliceosome RNA helicase DDX39B
Q13885	TUBB2A	13.4123	56.676	12.1392	4.22567	0.905079	proteasome	TBB2A_HUMAN Tubulin beta-2A chain
Q13895	BYSL	6.31569	11.6711	7.74899	1.84795	1.22694	not certain	BYST_HUMAN Bystin
Q13901	C1D	N/A	17.3547	N/A	N/A	N/A	N/A	C1D_HUMAN Nuclear nucleic acid-binding protein C1D
Q13907-2	IDI1	7.68626	31.0133	10.7166	4.0349	1.39425	proteasome	IDI1_HUMAN Isoform 2 of Isopentenyl-diphosphate Delta-isomerase 1
Q13936-2	CACNA1C	N/A	21.7424	N/A	N/A	N/A	N/A	CAC1C_HUMAN Isoform 2 of Voltage-dependent L-type calcium channel subunit alpha-1C
Q13948	CUX1	N/A	38.359	N/A	N/A	N/A	N/A	CASP_HUMAN Protein CASP
Q13952	NFYC	N/A	N/A	53.278	N/A	N/A	N/A	NFYC_HUMAN Nuclear transcription factor Y subunit gamma
Q14004	CDK13	9.71202	33.6643	29.9804	3.46625	3.08694	both	CDK13_HUMAN Cyclin-dependent kinase 13
Q14008-3	CKAP5	7.85258	42.3425	17.9665	5.39218	2.28797	both	CKAP5_HUMAN Isoform 3 of Cytoskeleton-associated protein 5
Q14011	CIRBP	5.35084	12.5139	7.93801	2.33869	1.48351	proteasome	CIRBP_HUMAN Cold-inducible RNA-binding protein
Q14061	COX17	N/A	9.39224	5.35952	N/A	N/A	N/A	COX17_HUMAN Cytochrome c oxidase copper chaperone
Q14103	HNRNPD	14.0826	21.0875	22.9823	1.49741	1.63196	not certain	HNRPD_HUMAN Heterogeneous nuclear ribonucleoprotein D0
Q14103-3	HNRNPD	N/A	1.47827	N/A	N/A	N/A	N/A	HNRPD_HUMAN Isoform 3 of Heterogeneous nuclear ribonucleoprotein D0
Q14119	VEZF1	7.18809	18.2647	12.3182	2.54097	1.7137	proteasome	VEZF1_HUMAN Vascular endothelial zinc finger 1
Q14139-2	UBE4A	N/A	15.4617	7.44439	N/A	N/A	N/A	UBE4A_HUMAN Isoform 2 of Ubiquitin conjugation factor E4 A
Q14151	SAFB2	9.43442	32.8817	21.9142	3.48529	2.32279	both	SAFB2_HUMAN Scaffold attachment factor B2
Q14152	EIF3A	10.0311	34.9898	19.9524	3.48814	1.98906	proteasome	EIF3A_HUMAN Eukaryotic translation initiation factor 3 subunit A
Q14157-1	UBAP2L	24.1431	N/A	N/A	N/A	N/A	N/A	UBP2L_HUMAN Isoform 2 of Ubiquitin-associated protein 2-like
Q14157-5	UBAP2L	12.1349	77.6201	7.06644	6.39642	0.582322	proteasome	UBP2L_HUMAN Isoform 5 of Ubiquitin-associated protein 2-like
Q14161	GIT2	N/A	18.0931	N/A	N/A	N/A	N/A	GIT2_HUMAN ARF GTPase-activating protein GIT2
Q14165	MLEC	17.5614	37.8562	19.6026	2.15565	1.11623	proteasome	MLEC_HUMAN Malectin
Q14166	TTLL12	21.1004	>200	N/A	9.47851	N/A	N/A	TTL12_HUMAN Tubulin--tyrosine ligase-like protein 12
Q14192	FHL2	9.49907	21.0045	9.1396	2.21121	0.962157	proteasome	FHL2_HUMAN Four and a half LIM domains protein 2
Q14197	ICT1	4.22909	10.0602	5.39372	2.37881	1.27539	proteasome	ICT1_HUMAN Peptidyl-tRNA hydrolase ICT1, mitochondrial
Q14203	DCTN1	8.58174	12.279	10.0602	1.43082	1.17228	not certain	DCTN1_HUMAN Dynactin subunit 1
Q14204	DYNC1H1	6.48043	16.2558	8.85359	2.50844	1.3662	proteasome	DYHC1_HUMAN Cytoplasmic dynein 1 heavy chain 1
Q14232	EIF2B1	15.3793	59.0918	29.9675	3.84228	1.94855	proteasome	EI2BA_HUMAN Translation initiation factor eIF-2B subunit alpha
Q14240-2	EIF4A2	7.18511	19.2487	13.9466	2.67898	1.94105	proteasome	IF4A2_HUMAN Isoform 2 of Eukaryotic initiation factor 4A-II
Q14241	TCEB3	15.8869	57.2849	17.1401	3.60579	1.07888	proteasome	ELOA1_HUMAN Transcription elongation factor B polypeptide 3
Q14244-7	MAP7	10.7765	35.8586	11.0093	3.32747	1.0216	proteasome	MAP7_HUMAN Isoform 7 of Ensconsin
Q14247	CTTN	31.3499	N/A	>200	N/A	6.3796	N/A	SRC8_HUMAN Src substrate cortactin
Q14247-2	CTTN	10.2719	25.6057	17.9665	2.4928	1.74909	proteasome	SRC8_HUMAN Isoform 2 of Src substrate cortactin
Q14249	ENDOG	4.76816	N/A	N/A	N/A	N/A	N/A	NUCG_HUMAN Endonuclease G, mitochondrial
Q14258	TRIM25	8.64381	31.723	37.427	3.67002	4.32991	both	TRI25_HUMAN E3 ubiquitin/ISG15 ligase TRIM25
Q14315	FLNC	15.3896	15.0064	36.9481	0.975103	2.40085	lysosome	FLNC_HUMAN Filamin-C
Q14318-2	FKBP8	11.5679	19.4814	20.9031	1.68409	1.807	not certain	FKBP8_HUMAN Isoform 2 of Peptidyl-prolyl cis-trans isomerase FKBP8
Q14320	FAM50A	11.0957	26.0386	10.2688	2.34673	0.925481	proteasome	FA50A_HUMAN Protein FAM50A
Q14344	GNA13	11.0462	27.8932	33.4208	2.52515	3.02555	both	GNA13_HUMAN Guanine nucleotide-binding protein subunit alpha-13
Q14435	GALNT3	13.1253	27.0233	9.05128	2.05887	0.689606	proteasome	GALT3_HUMAN Polypeptide N-acetylgalactosaminyltransferase 3
Q14444	CAPRIN1	6.07917	20.8591	6.05792	3.43124	0.996504	proteasome	CAPR1_HUMAN Caprin-1
Q14457	BECN1	5.83949	N/A	N/A	N/A	N/A	N/A	BECN1_HUMAN Beclin-1
Q14469	HES1	1.09706	4.95494	N/A	4.51655	N/A	N/A	HES1_HUMAN Transcription factor HES-1
Q14493	SLBP	3.33806	8.72871	N/A	2.61491	N/A	N/A	SLBP_HUMAN Histone RNA hairpin-binding protein
Q14498	RBM39	8.83215	45.4821	16.5508	5.14961	1.87393	proteasome	RBM39_HUMAN RNA-binding protein 39
Q14511-3	NEDD9	3.82722	N/A	N/A	N/A	N/A	N/A	CASL_HUMAN Isoform 3 of Enhancer of filamentation 1
Q14527	HLTF	12.1349	16.8403	7.53995	1.38776	0.621342	not certain	HLTF_HUMAN Helicase-like transcription factor
Q14534	SQLE	4.67017	13.5169	6.71459	2.89431	1.43776	proteasome	ERG1_HUMAN Squalene monooxygenase
Q14554	PDIA5	9.33657	28.0854	49.0897	3.0081	5.25779	both	PDIA5_HUMAN Protein disulfide-isomerase A5
Q14558-2	PRPSAP1	N/A	>200	N/A	N/A	N/A	N/A	KPRA_HUMAN Isoform 2 of Phosphoribosyl pyrophosphate synthase-associated protein 1
Q14566	MCM6	10.0224	15.9822	>200	1.59465	19.9554	lysosome	MCM6_HUMAN DNA replication licensing factor MCM6
Q14571	ITPR2	N/A	>200	N/A	N/A	N/A	N/A	ITPR2_HUMAN Inositol 1,4,5-trisphosphate receptor type 2
Q14592	ZNF460	N/A	20.7778	N/A	N/A	N/A	N/A	ZN460_HUMAN Zinc finger protein 460
Q14643	ITPR1	N/A	7.19182	N/A	N/A	N/A	N/A	ITPR1_HUMAN Inositol 1,4,5-trisphosphate receptor type 1
Q14651	PLS1	14.2272	37.186	19.759	2.61373	1.38883	proteasome	PLSI_HUMAN Plastin-1
Q14653-4	IRF3	7.25049	33.453	N/A	4.6139	N/A	N/A	IRF3_HUMAN Isoform 4 of Interferon regulatory factor 3
Q14669-3	TRIP12	7.91625	22.6815	8.31012	2.86518	1.04975	proteasome	TRIPC_HUMAN Isoform 3 of E3 ubiquitin-protein ligase TRIP12
Q14671-3	PUM1	9.80129	20.9537	12.8718	2.13785	1.31328	proteasome	PUM1_HUMAN Isoform 3 of Pumilio homolog 1
Q14677-3	CLINT1	11.3631	27.8932	13.6366	2.45473	1.20008	proteasome	EPN4_HUMAN Isoform 3 of Clathrin interactor 1
Q14680	MELK	5.10493	N/A	4.79322	N/A	0.938939	N/A	MELK_HUMAN Maternal embryonic leucine zipper kinase
Q14684	RRP1B	N/A	45.3334	21.7834	N/A	N/A	N/A	RRP1B_HUMAN Ribosomal RNA processing protein 1 homolog B
Q14687	GSE1	2.36529	6.61779	3.16824	2.79788	1.33947	proteasome	GSE1_HUMAN Genetic suppressor element 1
Q14690	PDCD11	5.94619	79.0362	8.60625	13.2919	1.44736	proteasome	RRP5_HUMAN Protein RRP5 homolog
Q14692	BMS1	8.69259	39.3163	10.7715	4.52297	1.23916	proteasome	BMS1_HUMAN Ribosome biogenesis protein BMS1 homolog
Q14694-2	USP10	10.4374	49.9386	16.6622	4.78458	1.59639	proteasome	UBP10_HUMAN Isoform 2 of Ubiquitin carboxyl-terminal hydrolase 10
Q14696	MESDC2	15.5345	35.9144	>200	2.31192	12.8746	both	MESD_HUMAN LDLR chaperone MESD
Q14697-2	GANAB	14.3836	25.5209	45.7221	1.7743	3.17876	lysosome	GANAB_HUMAN Isoform 2 of Neutral alpha-glucosidase AB
Q14728	MFSD10	N/A	33.2924	87.7401	N/A	N/A	N/A	MFS10_HUMAN Major facilitator superfamily domain-containing protein 10
Q14738	PPP2R5D	10.3178	84.0178	16.8567	8.14303	1.63375	proteasome	2A5D_HUMAN Serine/threonine-protein phosphatase 2A 56 kDa regulatory subunit delta isoform
Q14739	LBR	15.1144	46.8659	15.0848	3.10074	0.998041	proteasome	LBR_HUMAN Lamin-B receptor
Q14789-2	GOLGB1	14.565	N/A	N/A	N/A	N/A	N/A	GOGB1_HUMAN Isoform 2 of Golgin subfamily B member 1
Q14790-9	CASP8	N/A	48.7103	N/A	N/A	N/A	N/A	CASP8_HUMAN Isoform 9 of Caspase-8
Q14807	KIF22	3.38137	8.88195	5.65927	2.62673	1.67366	proteasome	KIF22_HUMAN Kinesin-like protein KIF22
Q14839-2	CHD4	9.45115	25.3807	28.2802	2.68546	2.99225	both	CHD4_HUMAN Isoform 2 of Chromodomain-helicase-DNA-binding protein 4
Q14847	LASP1	12.1158	>200	N/A	16.5073	N/A	N/A	LASP1_HUMAN LIM and SH3 domain protein 1
Q14847-2	LASP1	10.5118	22.4174	11.2725	2.1326	1.07237	proteasome	LASP1_HUMAN Isoform 2 of LIM and SH3 domain protein 1
Q14865	ARID5B	1.64984	6.51454	2.12635	3.94859	1.28882	proteasome	ARI5B_HUMAN AT-rich interactive domain-containing protein 5B
Q14919-2	DRAP1	4.1688	5.53942	6.03209	1.32878	1.44696	not certain	NC2A_HUMAN Isoform 2 of Dr1-associated corepressor
Q14966	ZNF638	10.8406	35.7477	22.8837	3.29758	2.11093	both	ZN638_HUMAN Zinc finger protein 638
Q14974	KPNB1	15.0947	25.6531	27.8932	1.69948	1.84789	not certain	IMB1_HUMAN Importin subunit beta-1
Q14978-2	NOLC1	12.1669	N/A	>200	N/A	16.4381	N/A	NOLC1_HUMAN Isoform Beta of Nucleolar and coiled-body phosphoprotein 1
Q14980	NUMA1	11.9385	29.5711	34.1957	2.47696	2.86433	both	NUMA1_HUMAN Nuclear mitotic apparatus protein 1
Q14997	PSME4	N/A	N/A	46.8976	N/A	N/A	N/A	PSME4_HUMAN Proteasome activator complex subunit 4
Q14C86-6	GAPVD1	12.1349	53.278	34.6574	4.39047	2.856	both	GAPD1_HUMAN Isoform 6 of GTPase-activating protein and VPS9 domain-containing protein 1
Q14CX7	NAA25	18.7489	N/A	17.1741	N/A	0.916006	N/A	NAA25_HUMAN N-alpha-acetyltransferase 25, NatB auxiliary subunit
Q14CZ7	FASTKD3	N/A	N/A	12.9876	N/A	N/A	N/A	FAKD3_HUMAN FAST kinase domain-containing protein 3
Q15003	NCAPH	3.96379	N/A	N/A	N/A	N/A	N/A	CND2_HUMAN Condensin complex subunit 2
Q15004	KIAA0101	2.53297	N/A	2.62397	N/A	1.03593	N/A	PAF15_HUMAN PCNA-associated factor
Q15005	SPCS2	7.01495	44.1214	8.239	6.28962	1.17449	proteasome	SPCS2_HUMAN Signal peptidase complex subunit 2
Q15006	EMC2	13.4019	25.4273	N/A	1.89729	N/A	N/A	EMC2_HUMAN ER membrane protein complex subunit 2
Q15007	WTAP	5.90818	6.33185	9.51994	1.07171	1.61132	not certain	FL2D_HUMAN Pre-mRNA-splicing regulator WTAP
Q15008	PSMD6	1.83154	7.51053	1.19496	4.10066	0.652433	proteasome	PSMD6_HUMAN 26S proteasome non-ATPase regulatory subunit 6
Q15014	MORF4L2	2.95989	4.18567	1.63024	1.41413	0.550778	not certain	MO4L2_HUMAN Mortality factor 4-like protein 2
Q15019-2	SEPT2	3.83357	13.2634	6.0558	3.45982	1.57968	proteasome	SEPT2_HUMAN Isoform 2 of Septin-2
Q15020	SART3	12.7417	55.6298	22.8611	4.36597	1.7942	proteasome	SART3_HUMAN Squamous cell carcinoma antigen recognized by T-cells 3
Q15025	TNIP1	N/A	6.17668	N/A	N/A	N/A	N/A	TNIP1_HUMAN TNFAIP3-interacting protein 1
Q15029	EFTUD2	N/A	29.5333	N/A	N/A	N/A	N/A	U5S1_HUMAN 116 kDa U5 small nuclear ribonucleoprotein component
Q15031	LARS2	8.93116	4.84109	10.7415	0.542045	1.2027	not certain	SYLM_HUMAN Probable leucine--tRNA ligase, mitochondrial
Q15032	R3HDM1	N/A	100.895	17.2168	N/A	N/A	N/A	R3HD1_HUMAN R3H domain-containing protein 1
Q15035	TRAM2	N/A	13.7638	N/A	N/A	N/A	N/A	TRAM2_HUMAN Translocating chain-associated membrane protein 2
Q15041	ARL6IP1	8.81642	36.4239	8.9082	4.13137	1.01041	proteasome	AR6P1_HUMAN ADP-ribosylation factor-like protein 6-interacting protein 1
Q15046	KARS	N/A	11.5621	24.9154	N/A	N/A	N/A	SYK_HUMAN Lysine--tRNA ligase
Q15046-2	KARS	11.8852	18.3469	20.4529	1.54367	1.72086	not certain	SYK_HUMAN Isoform Mitochondrial of Lysine--tRNA ligase
Q15047	SETDB1	4.34439	N/A	6.03892	N/A	1.39005	N/A	SETB1_HUMAN Histone-lysine N-methyltransferase SETDB1
Q15050	RRS1	N/A	N/A	13.4566	N/A	N/A	N/A	RRS1_HUMAN Ribosome biogenesis regulatory protein homolog
Q15054	POLD3	9.43186	18.9281	24.5275	2.00683	2.6005	both	DPOD3_HUMAN DNA polymerase delta subunit 3
Q15056	EIF4H	N/A	30.4814	11.7165	N/A	N/A	N/A	IF4H_HUMAN Eukaryotic translation initiation factor 4H
Q15058	KIF14	7.682	N/A	N/A	N/A	N/A	N/A	KIF14_HUMAN Kinesin-like protein KIF14
Q15059	BRD3	N/A	31.6506	10.2234	N/A	N/A	N/A	BRD3_HUMAN Bromodomain-containing protein 3
Q15061	WDR43	4.68754	8.01048	5.5514	1.70889	1.18429	not certain	WDR43_HUMAN WD repeat-containing protein 43
Q15070	OXA1L	8.73201	25.1596	13.6635	2.88131	1.56475	proteasome	OXA1L_HUMAN Mitochondrial inner membrane protein OXA1L
Q15075	EEA1	12.0192	N/A	40.6777	N/A	3.38439	N/A	EEA1_HUMAN Early endosome antigen 1
Q15084-2	PDIA6	15.2073	74.372	30.468	4.89056	2.00352	both	PDIA6_HUMAN Isoform 2 of Protein disulfide-isomerase A6
Q15118	PDK1	N/A	N/A	26.2556	N/A	N/A	N/A	PDK1_HUMAN [Pyruvate dehydrogenase (acetyl-transferring)] kinase isozyme 1, mitochondrial
Q15119	PDK2	N/A	12.8076	N/A	N/A	N/A	N/A	PDK2_HUMAN [Pyruvate dehydrogenase (acetyl-transferring)] kinase isozyme 2, mitochondrial
Q15120-2	PDK3	7.97913	8.79628	8.63412	1.10241	1.08209	not certain	PDK3_HUMAN Isoform 2 of [Pyruvate dehydrogenase (acetyl-transferring)] kinase isozyme 3, mitochondrial
Q15131	CDK10	N/A	6.98737	N/A	N/A	N/A	N/A	CDK10_HUMAN Cyclin-dependent kinase 10
Q15149	PLEC	8.11078	16.7104	22.3524	2.06027	2.75589	both	PLEC_HUMAN Plectin
Q15149-4	PLEC	9.93048	N/A	56.0345	N/A	5.64268	N/A	PLEC_HUMAN Isoform 4 of Plectin
Q15170-2	TCEAL1	N/A	13.4279	N/A	N/A	N/A	N/A	TCAL1_HUMAN Isoform 2 of Transcription elongation factor A protein-like 1
Q15172	PPP2R5A	12.9102	>200	14.3331	15.4917	1.11022	proteasome	2A5A_HUMAN Serine/threonine-protein phosphatase 2A 56 kDa regulatory subunit alpha isoform
Q15173	PPP2R5B	11.6593	145.926	N/A	12.5158	N/A	N/A	2A5B_HUMAN Serine/threonine-protein phosphatase 2A 56 kDa regulatory subunit beta isoform
Q15181	PPA1	13.3042	21.473	38.6585	1.614	2.90574	lysosome	IPYR_HUMAN Inorganic pyrophosphatase
Q15185	PTGES3	18.2167	37.9599	33.6806	2.08379	1.84888	proteasome	TEBP_HUMAN Prostaglandin E synthase 3
Q15198	PDGFRL	0.929214	N/A	N/A	N/A	N/A	N/A	PGFRL_HUMAN Platelet-derived growth factor receptor-like protein
Q15208	STK38	5.28032	N/A	6.86488	N/A	1.30009	N/A	STK38_HUMAN Serine/threonine-protein kinase 38
Q15233	NONO	9.74069	12.4109	30.7382	1.27413	3.15565	lysosome	NONO_HUMAN Non-POU domain-containing octamer-binding protein
Q15257	PPP2R4	11.7982	36.6163	12.5004	3.10354	1.05951	proteasome	PTPA_HUMAN Serine/threonine-protein phosphatase 2A activator
Q15257-2	PPP2R4	N/A	113.817	N/A	N/A	N/A	N/A	PTPA_HUMAN Isoform 1 of Serine/threonine-protein phosphatase 2A activator
Q15269	PWP2	N/A	7.27943	N/A	N/A	N/A	N/A	PWP2_HUMAN Periodic tryptophan protein 2 homolog
Q15286	RAB35	14.2917	10.705	>200	0.749035	13.9941	lysosome	RAB35_HUMAN Ras-related protein Rab-35
Q15287	RNPS1	9.14804	17.9618	N/A	1.96346	N/A	N/A	RNPS1_HUMAN RNA-binding protein with serine-rich domain 1
Q15306	IRF4	N/A	N/A	10.2234	N/A	N/A	N/A	IRF4_HUMAN Interferon regulatory factor 4
Q15334	LLGL1	13.5064	N/A	N/A	N/A	N/A	N/A	L2GL1_HUMAN Lethal(2) giant larvae protein homolog 1
Q15345	LRRC41	N/A	9.5567	8.18452	N/A	N/A	N/A	LRC41_HUMAN Leucine-rich repeat-containing protein 41
Q15349-2	RPS6KA2	15.7498	>200	10.6507	12.6986	0.676245	proteasome	KS6A2_HUMAN Isoform 2 of Ribosomal protein S6 kinase alpha-2
Q15363	TMED2	13.4566	12.8503	12.8194	0.95495	0.952654	not certain	TMED2_HUMAN Transmembrane emp24 domain-containing protein 2
Q15365	PCBP1	13.9747	N/A	17.934	N/A	1.28331	N/A	PCBP1_HUMAN Poly(rC)-binding protein 1
Q15366-2	PCBP2	10.6067	>200	29.5333	18.856	2.78441	both	PCBP2_HUMAN Isoform 2 of Poly(rC)-binding protein 2
Q15369	TCEB1	13.2406	14.7793	N/A	1.1162	N/A	N/A	ELOC_HUMAN Transcription elongation factor B polypeptide 1
Q15370-2	TCEB2	4.92467	17.6284	6.29676	3.5796	1.27862	proteasome	ELOB_HUMAN Isoform 2 of Transcription elongation factor B polypeptide 2
Q15382	RHEB	38.9409	90.1362	>200	2.31469	5.13599	both	RHEB_HUMAN GTP-binding protein Rheb
Q15386	UBE3C	10.5711	26.4257	17.3939	2.49981	1.64542	proteasome	UBE3C_HUMAN Ubiquitin-protein ligase E3C
Q15388	TOMM20	9.66598	23.2055	15.8289	2.40074	1.63759	proteasome	TOM20_HUMAN Mitochondrial import receptor subunit TOM20 homolog
Q15392	DHCR24	7.56794	9.81656	10.5502	1.29713	1.39406	not certain	DHC24_HUMAN Delta(24)-sterol reductase
Q15393	SF3B3	N/A	75.3421	N/A	N/A	N/A	N/A	SF3B3_HUMAN Splicing factor 3B subunit 3
Q15397	KIAA0020	N/A	N/A	9.94472	N/A	N/A	N/A	K0020_HUMAN Pumilio domain-containing protein KIAA0020
Q15398	DLGAP5	4.62684	26.3554	6.39789	5.6962	1.38278	proteasome	DLGP5_HUMAN Disks large-associated protein 5
Q15404	RSU1	11.7443	57.4749	17.6598	4.89386	1.50369	proteasome	RSU1_HUMAN Ras suppressor protein 1
Q15417	CNN3	N/A	69.7331	7.39909	N/A	N/A	N/A	CNN3_HUMAN Calponin-3
Q15418-2	RPS6KA1	N/A	N/A	22.6149	N/A	N/A	N/A	KS6A1_HUMAN Isoform 2 of Ribosomal protein S6 kinase alpha-1
Q15424-3	SAFB	9.69979	N/A	12.1477	N/A	1.25237	N/A	SAFB1_HUMAN Isoform 3 of Scaffold attachment factor B1
Q15427	SF3B4	4.39563	26.1861	8.05891	5.95731	1.83339	proteasome	SF3B4_HUMAN Splicing factor 3B subunit 4
Q15428	SF3A2	10.4358	12.7464	>200	1.2214	19.1648	lysosome	SF3A2_HUMAN Splicing factor 3A subunit 2
Q15435	PPP1R7	9.53173	N/A	12.7887	N/A	1.3417	N/A	PP1R7_HUMAN Protein phosphatase 1 regulatory subunit 7
Q15437	SEC23B	N/A	38.7233	21.4199	N/A	N/A	N/A	SC23B_HUMAN Protein transport protein Sec23B
Q15459	SF3A1	10.8152	22.6371	43.9814	2.09308	4.06662	both	SF3A1_HUMAN Splicing factor 3A subunit 1
Q15465	SHH	4.88717	10.9346	7.12601	2.23742	1.45811	proteasome	SHH_HUMAN Sonic hedgehog protein
Q15475	SIX1	N/A	N/A	1.3851	N/A	N/A	N/A	SIX1_HUMAN Homeobox protein SIX1
Q15526	SURF1	8.92081	13.2863	11.1153	1.48936	1.24599	not certain	SURF1_HUMAN Surfeit locus protein 1
Q15527	SURF2	9.24936	N/A	14.0455	N/A	1.51854	N/A	SURF2_HUMAN Surfeit locus protein 2
Q15554-3	TERF2	8.07017	16.3017	12.422	2.01999	1.53925	proteasome	TERF2_HUMAN Isoform 3 of Telomeric repeat-binding factor 2
Q15555	MAPRE2	12.7793	11.5872	10.4484	0.90672	0.817606	not certain	MARE2_HUMAN Microtubule-associated protein RP/EB family member 2
Q15560	TCEA2	N/A	11.6163	N/A	N/A	N/A	N/A	TCEA2_HUMAN Transcription elongation factor A protein 2
Q15562-2	TEAD2	N/A	27.5058	N/A	N/A	N/A	N/A	TEAD2_HUMAN Isoform 2 of Transcriptional enhancer factor TEF-4
Q15583	TGIF1	N/A	N/A	3.2974	N/A	N/A	N/A	TGIF1_HUMAN Homeobox protein TGIF1
Q15596	NCOA2	1.58768	4.84413	2.04849	3.05109	1.29024	proteasome	NCOA2_HUMAN Nuclear receptor coactivator 2
Q15599	SLC9A3R2	13.3838	N/A	N/A	N/A	N/A	N/A	NHRF2_HUMAN Na(+)/H(+) exchange regulatory cofactor NHE-RF2
Q15629	TRAM1	9.43314	16.6662	22.4247	1.76677	2.37722	lysosome	TRAM1_HUMAN Translocating chain-associated membrane protein 1
Q15631	TSN	7.37783	12.1541	9.83885	1.64738	1.33357	not certain	TSN_HUMAN Translin
Q15637-5	SF1	10.9954	26.2357	46.4887	2.38607	4.22803	both	SF01_HUMAN Isoform 5 of Splicing factor 1
Q15643	TRIP11	16.7023	>200	>200	11.9744	11.9744	both	TRIPB_HUMAN Thyroid receptor-interacting protein 11
Q15649	ZNHIT3	3.64201	7.88563	4.3184	2.16519	1.18572	proteasome	ZNHI3_HUMAN Zinc finger HIT domain-containing protein 3
Q15691	MAPRE1	10.9467	91.565	11.2414	8.3646	1.02692	proteasome	MARE1_HUMAN Microtubule-associated protein RP/EB family member 1
Q15700-2	DLG2	N/A	>200	N/A	N/A	N/A	N/A	DLG2_HUMAN Isoform 2 of Disks large homolog 2
Q15717	ELAVL1	11.8083	44.6041	11.7642	3.77735	0.996266	proteasome	ELAV1_HUMAN ELAV-like protein 1
Q15738	NSDHL	10.4768	17.8923	23.7298	1.7078	2.26498	lysosome	NSDHL_HUMAN Sterol-4-alpha-carboxylate 3-dehydrogenase, decarboxylating
Q15742	NAB2	9.63641	22.0117	10.7099	2.28422	1.1114	proteasome	NAB2_HUMAN NGFI-A-binding protein 2
Q15758	SLC1A5	10.439	25.8348	23.425	2.47484	2.244	both	AAAT_HUMAN Neutral amino acid transporter B(0)
[truncated: 2,044 more rows]
