# Supplementary material for: Systematic quantification of the dynamics of newly synthesized proteins unveiling their degradation pathways in human cells
Source: Chem Sci. 2020 Mar 10;11(13):3557–68. doi: 10.1039/c9sc06479f (PMC8152571; doi:10.1039/c9sc06479f)
Supplement: SC-011-C9SC06479F-s006 [file SC-011-C9SC06479F-s006.xlsx]

## Sheet: Proteasome
Table S5a - Degradation pathways of proteins in the proteasome
Uniprot ID	Gene Symbol	Fold change (Btz/Ctrl)	Fold change (3MA/Ctrl)	Degradation pathway	Systematic nomenclature	Chain#	Annotation
P25786-2	PSMA1	1.08476	1.33431	not certain	α6	G, m	PSA1_HUMAN Isoform Long of Proteasome subunit alpha type-1
P25788	PSMA3	2.00468	1.3694	proteasome	α7	X, n	PSA3_HUMAN Proteasome subunit alpha type-3
P25789	PSMA4	1.3637	1.14079	not certain	α3	D, j	PSA4_HUMAN Proteasome subunit alpha type-4
P60900	PSMA6	1.67241	1.2568	not certain	α1	B, h	PSA6_HUMAN Proteasome subunit alpha type-6
O14818	PSMA7	2.05141	1.34454	proteasome	α4	E, k	PSA7_HUMAN Proteasome subunit alpha type-7
P20618	PSMB1	1.36078	0.943458	not certain	β6	f, t	PSB1_HUMAN Proteasome subunit beta type-1
P62191	PSMC1	3.1526	0.789038	proteasome	Rpt2	I, w	PRS4_HUMAN 26S protease regulatory subunit 4
P35998	PSMC2	1.54218	0.853925	not certain	Rpt1	H, v	PRS7_HUMAN 26S protease regulatory subunit 7
P17980	PSMC3	2.31151	1.40143	proteasome	Rpt5	M, 0	PRS6A_HUMAN 26S protease regulatory subunit 6A
P43686	PSMC4	4.73562	1.2066	proteasome	Rpt3	K, y	PRS6B_HUMAN 26S protease regulatory subunit 6B
P62195	PSMC5	5.43427	0.974472	proteasome	Rpt6	J, x	PRS8_HUMAN 26S protease regulatory subunit 8
P62333	PSMC6	3.07489	1.20785	proteasome	Rpt4	L, z	PRS10_HUMAN 26S protease regulatory subunit 10B
Q99460	PSMD1	30.1292	3.32442	both	Rpn2	N, 1	PSMD1_HUMAN 26S proteasome non-ATPase regulatory subunit 1
O00231-2	PSMD11	1.11337	0.504255	not certain	Rpn6	Q, 4	PSD11_HUMAN Isoform 2 of 26S proteasome non-ATPase regulatory subunit 11
O00232	PSMD12	2.31619	0.839786	proteasome	Rpn5	P, 3	PSD12_HUMAN 26S proteasome non-ATPase regulatory subunit 12
Q9UNM6-2	PSMD13	2.52934	1.33173	proteasome	Rpn9	O, 2	PSD13_HUMAN Isoform 2 of 26S proteasome non-ATPase regulatory subunit 13
O00487	PSMD14	2.11134	0.958848	proteasome	Rpn11	V, 9	PSDE_HUMAN 26S proteasome non-ATPase regulatory subunit 14
Q13200	PSMD2	4.56993	0.979271	proteasome	Rpn1	Z, AC	PSMD2_HUMAN 26S proteasome non-ATPase regulatory subunit 2
O43242	PSMD3	2.20545	2.12455	both	Rpn3	S, 6	PSMD3_HUMAN 26S proteasome non-ATPase regulatory subunit 3
Q15008	PSMD6	4.10066	0.652433	proteasome	Rpn7	R, 5	PSMD6_HUMAN 26S proteasome non-ATPase regulatory subunit 6
P51665	PSMD7	1.79881	2.20277	lysosome	Rpn8	U, 8	PSMD7_HUMAN 26S proteasome non-ATPase regulatory subunit 7
P48556	PSMD8	1.82285	0.934605	not certain	Rpn12	T, 7	PSMD8_HUMAN 26S proteasome non-ATPase regulatory subunit 8
Q16186	ADRM1	1.33707	0.793686	not certain	Rpn13	Not shown	ADRM1_HUMAN Proteasomal ubiquitin receptor

## Sheet: Ribosome
Table S5b - Degradation pathways of proteins in the ribosome
Uniprot ID	Gene Symbol	Fold change (Btz/Ctrl)	Fold change (3MA/Ctrl)	Degradation pathway	Chain#	Annotation
P08865	RPSA	1.50363	1.40015	not certain	SA	RSSA_HUMAN 40S ribosomal protein SA
P46781	RPS9	1.89957	0.967154	not certain	SJ	RS9_HUMAN 40S ribosomal protein S9
P62081	RPS7	1.37335	0.638919	not certain	SH	RS7_HUMAN 40S ribosomal protein S7
P62753	RPS6	2.45845	0.837044	proteasome	SG	RS6_HUMAN 40S ribosomal protein S6
P46782	RPS5	2.57104	1.90573	proteasome	SF	RS5_HUMAN 40S ribosomal protein S5
P62701	RPS4X	2.11814	1.41217	proteasome	SE	RS4X_HUMAN 40S ribosomal protein S4, X isoform
P61247	RPS3A	1.83189	1.32178	not certain	SB	RS3A_HUMAN 40S ribosomal protein S3a
P62851	RPS25	1.93348	1.6214	not certain	SZ	RS25_HUMAN 40S ribosomal protein S25
P63220	RPS21	3.12059	1.63736	proteasome	SV	RS21_HUMAN 40S ribosomal protein S21
P15880	RPS2	1.56526	0.773515	not certain	SC	RS2_HUMAN 40S ribosomal protein S2
P39019	RPS19	3.04489	0.808226	proteasome	ST	RS19_HUMAN 40S ribosomal protein S19
P62269	RPS18	1.8699	0.981467	not certain	SS	RS18_HUMAN 40S ribosomal protein S18
P0CW22	RPS17L	1.24015	0.657324	not certain	SR	RS17L_HUMAN 40S ribosomal protein S17-like
P62249	RPS16	1.40383	0.716912	not certain	SQ	RS16_HUMAN 40S ribosomal protein S16
P62244	RPS15A	1.73016	0.804348	not certain	SW	RS15A_HUMAN 40S ribosomal protein S15a
P62841	RPS15	3.48391	0.929379	proteasome	SP	RS15_HUMAN 40S ribosomal protein S15
P62263	RPS14	5.00824	1.17552	proteasome	SO	RS14_HUMAN 40S ribosomal protein S14
P62277	RPS13	1.4371	0.633813	not certain	SN	RS13_HUMAN 40S ribosomal protein S13
P25398	RPS12	2.00531	0.749835	proteasome	not shown	RS12_HUMAN 40S ribosomal protein S12
P62280	RPS11	2.37232	1.15094	proteasome	SL	RS11_HUMAN 40S ribosomal protein S11
Q9NQ39	RPS10P5	2.1499	1.6775	proteasome	SK	RS10L_HUMAN Putative 40S ribosomal protein S10-like
P05387	RPLP2	1.78914	1.0829	not certain	not shown	RLA2_HUMAN 60S acidic ribosomal protein P2
Q8NHW5	RPLP0P6	0.738371	2.15711	lysosome	not shown	RLA0L_HUMAN 60S acidic ribosomal protein P0-like
P05388	RPLP0	0.83199	1.14214	not certain	not shown	RLA0_HUMAN 60S acidic ribosomal protein P0
P32969	RPL9	2.21071	1.04516	proteasome	LH	RL9_HUMAN 60S ribosomal protein L9
Q6DKI1	RPL7L1	4.29916	1.44893	proteasome	not shown	RL7L_HUMAN 60S ribosomal protein L7-like 1
P62424	RPL7A	1.80173	0.810037	not certain	LG	RL7A_HUMAN 60S ribosomal protein L7a
P18124	RPL7	15.4888	1.09484	proteasome	LF	RL7_HUMAN 60S ribosomal protein L7
Q02878	RPL6	17.3616	1.6477	proteasome	LE	RL6_HUMAN 60S ribosomal protein L6
P46777	RPL5	2.11781	1.65373	proteasome	LD	RL5_HUMAN 60S ribosomal protein L5
P36578	RPL4	29.3098	0.751999	proteasome	LC	RL4_HUMAN 60S ribosomal protein L4
P61927	RPL37	2.74499	1.85814	proteasome	Lj	RL37_HUMAN 60S ribosomal protein L37
P83881	RPL36A	2.6923	0.521043	proteasome	Lo	RL36A_HUMAN 60S ribosomal protein L36a
P18077	RPL35A	1.26362	0.828221	not certain	Lf	RL35A_HUMAN 60S ribosomal protein L35a
P42766	RPL35	2.8955	0.876331	proteasome	Lh	RL35_HUMAN 60S ribosomal protein L35
P62910	RPL32	2.55646	1.06673	proteasome	Le	RL32_HUMAN 60S ribosomal protein L32
P62888	RPL30	3.19963	1.03722	proteasome	Lc	RL30_HUMAN 60S ribosomal protein L30
P39023	RPL3	3.18252	1.24	proteasome	LB	RL3_HUMAN 60S ribosomal protein L3
P47914	RPL29	1.87527	1.03947	not certain	Lr	RL29_HUMAN 60S ribosomal protein L29
P46776	RPL27A	1.31585	0.960668	not certain	La	RL27A_HUMAN 60S ribosomal protein L27a
P61353	RPL27	1.95105	1.31125	not certain	LZ	RL27_HUMAN 60S ribosomal protein L27
P61254	RPL26	1.61194	1.45168	not certain	LY	RL26_HUMAN 60S ribosomal protein L26
P83731	RPL24	2.36147	0.970602	proteasome	LW	RL24_HUMAN 60S ribosomal protein L24
P62750	RPL23A	1.48793	1.06849	not certain	LX	RL23A_HUMAN 60S ribosomal protein L23a
P62829	RPL23	4.06212	1.12089	proteasome	LV	RL23_HUMAN 60S ribosomal protein L23
P35268	RPL22	1.50599	0.887656	not certain	LU	RL22_HUMAN 60S ribosomal protein L22
P46778	RPL21	2.36206	1.22251	proteasome	LT	RL21_HUMAN 60S ribosomal protein L21
P84098	RPL19	3.29885	2.08879	both	LR	RL19_HUMAN 60S ribosomal protein L19
Q02543	RPL18A	8.62515	1.6627	proteasome	LS	RL18A_HUMAN 60S ribosomal protein L18a
Q07020	RPL18	2.16478	0.695323	proteasome	LQ	RL18_HUMAN 60S ribosomal protein L18
P40429	RPL13A	1.86739	1.79467	not certain	LO	RL13A_HUMAN 60S ribosomal protein L13a
P26373	RPL13	1.83104	0.621518	not certain	LL	RL13_HUMAN 60S ribosomal protein L13
P30050	RPL12	1.52988	0.904576	not certain	not shown	RL12_HUMAN 60S ribosomal protein L12
P62913	RPL11	1.54303	1.73627	not certain	Lj	RL11_HUMAN 60S ribosomal protein L11
Q96L21	RPL10L	1.58136	1.19216	not certain	LI	RL10L_HUMAN 60S ribosomal protein L10-like
P62906	RPL10A	2.10522	0.92268	proteasome	Lz	RL10A_HUMAN 60S ribosomal protein L10a
P27635	RPL10	1.89985	0.866862	not certain	not shown	RL10_HUMAN 60S ribosomal protein L10
P82933	MRPS9	2.404	0.974067	proteasome	AI	RT09_HUMAN 28S ribosomal protein S9, mitochondrial
Q9Y2R9	MRPS7	1.32648	0.690092	not certain	AG	RT07_HUMAN 28S ribosomal protein S7, mitochondrial
P82675	MRPS5	1.80857	1.09856	not certain	AE	RT05_HUMAN 28S ribosomal protein S5, mitochondrial
P82673	MRPS35	2.11665	1.38771	proteasome	Ak Af	RT35_HUMAN 28S ribosomal protein S35, mitochondrial
Q92552	MRPS27	12.7703	1.65552	proteasome	Ae	RT27_HUMAN 28S ribosomal protein S27, mitochondrial
Q9BYN8	MRPS26	1.65768	0.885085	not certain	Ad	RT26_HUMAN 28S ribosomal protein S26, mitochondrial
P82663	MRPS25	1.82732	1.19843	not certain	Ac	RT25_HUMAN 28S ribosomal protein S25, mitochondrial
P82650	MRPS22	1.09917	1.01691	not certain	Aa	RT22_HUMAN 28S ribosomal protein S22, mitochondrial
Q9Y399	MRPS2	1.92049	1.02045	not certain	AB	RT02_HUMAN 28S ribosomal protein S2, mitochondrial
P82914	MRPS15	1.50488	1.02956	not certain	AO	RT15_HUMAN 28S ribosomal protein S15, mitochondrial
Q9BYD2	MRPL9	2.23451	0.948442	proteasome	BI	RM09_HUMAN 39S ribosomal protein L9, mitochondrial
Q13405	MRPL49	2.27897	0.860028	proteasome	Bl	RM49_HUMAN 39S ribosomal protein L49, mitochondrial
Q96GC5	MRPL48	2.57998	1.93564	proteasome	Bk	RM48_HUMAN 39S ribosomal protein L48, mitochondrial
Q9HD33	MRPL47	5.7149	1.07278	proteasome	B2	RM47_HUMAN 39S ribosomal protein L47, mitochondrial
Q9H2W6	MRPL46	1.49881	1.40246	not certain	Bj	RM46_HUMAN 39S ribosomal protein L46, mitochondrial
Q9H9J2	MRPL44	1.61064	1.05852	not certain	Bh	RM44_HUMAN 39S ribosomal protein L44, mitochondrial
Q8IXM3	MRPL41	1.8736	0.80033	not certain	Be	RM41_HUMAN 39S ribosomal protein L41, mitochondrial
Q9NQ50	MRPL40	2.42403	1.11954	proteasome	Bd	RM40_HUMAN 39S ribosomal protein L40, mitochondrial
Q9BYD3	MRPL4	1.73258	0.915351	not certain	BF	RM04_HUMAN 39S ribosomal protein L4, mitochondrial
Q9BZE1	MRPL37	1.99308	0.99013	not certain	Ba BD	RM37_HUMAN 39S ribosomal protein L37, mitochondrial
P09001	MRPL3	0.870536	0.670579	not certain	BE	RM03_HUMAN 39S ribosomal protein L3, mitochondrial
Q13084	MRPL28	1.07812	0.760268	not certain	B1	RM28_HUMAN 39S ribosomal protein L28, mitochondrial
Q9Y3B7	MRPL11	2.35482	1.10361	proteasome	BK	RM11_HUMAN 39S ribosomal protein L11, mitochondrial
Q9BYD6	MRPL1	1.17728	1.21752	not certain	not shown	RM01_HUMAN 39S ribosomal protein L1, mitochondrial
P51398	DAP3	1.1878	0.785649	not certain	Ag	RT29_HUMAN 28S ribosomal protein S29, mitochondrial

## Sheet: Term
proteasome	Ubiquitin-proteasome pathway
lysosome	Autophagy-lysosome pathway
Chain#	Location in the complex structure
